# Supplementary material for: Altered hepatic metabolism mediates sepsis preventive effects of reduced glucose supply in infected preterm newborns
Source: bioRxiv preprint, doi:10.1101/2023.09.11.557116, version 3 (2024-08-28)
Supplement: Sup. Table 2 [file 557116_file03.xlsx]

## Sheet: overview
Whole blood transcriptome
Table 1	DEGs between High_SE vs Low_SE
Table 2	DEGs between High_control vs Low_control
Table 3	DEGs between High_control vs High_SE
Table 4	DEGs between low_control vs Low_SE
Table 5	label code
High: High PN glucose 21%
low: Low PN glucose 5%

## Sheet: DEGSEhighvsLow
ENSID	GeneName	GeneDescription	baseMean	log2FoldChange	lfcSE	stat	pvalue	padj	IAIPSBlood1	IAIPSBlood2	IAIPSBlood3	IAIPSBlood4	IAIPSBlood5	IAIPSBlood6	IAIPSBlood7	IAIPSBlood8	IAIPSBlood9	IAIPSBlood10	IAIPSBlood11	IAIPSBlood12	IAIPSBlood13	IAIPSBlood14	IAIPSBlood15	IAIPSBlood16	IAIPSBlood17	IAIPSBlood18	IAIPSBlood19	IAIPSBlood20	IAIPSBlood21	IAIPSBlood22	IAIPSBlood23	IAIPSBlood24	IAIPSBlood25	IAIPSBlood26	IAIPSBlood27	IAIPSBlood28	IAIPSBlood29	IAIPSBlood30	IAIPSBlood31	IAIPSBlood32	IAIPSBlood33	IAIPSBlood34	IAIPSBlood35	IAIPSBlood36	IAIPSBlood37	IAIPSBlood38	IAIPSBlood39
ENSSSCG00000035805	DLK1	delta like non-canonical Notch ligand 1	8.99244	-4.32278	1.32645	-3.2589	0.00111843	0.038277	0	99.0379	11.8559	0	1.10215	0	2.50082	0	0	0	0	0	1.13597	1.64605	2.76264	0	4.01953	1.43761	0	0	0	1.37277	0	30.148	0	0	8.20437	2.7671	29.3949	0	14.7787	0	1.10179	0	41.8926	21.2071	74.3391	0	0
ENSSSCG00000011147	AKR1C2	aldo-keto reductase family 1, member C1	3.9095	-2.9216	0.991103	-2.94782	0.00320019	0.0678764	0	0	0	0	1.10215	5.62288	1.66721	0	7.85563	0	32.9349	0.980846	21.5835	7.40721	13.8132	1.81384	7.23515	2.87522	0	1.50635	0.512971	6.86386	0	0	2.71641	0	2.73479	0	4.81008	0	0	0	0	0	0	0	3.77995	0	24.6544
ENSSSCG00000024933	SLC36A4	solute carrier family 36 member 4	5.16303	-1.72981	0.490049	-3.52987	0.000415766	0.0201831	7.53899	5.03583	10.6703	4.81298	9.91938	9.37146	9.16967	8.1829	9.42676	0	18.0611	4.57728	2.27194	9.05326	1.38132	0	2.81367	1.43761	6.55526	5.27223	3.84728	4.11832	1.02786	0	14.9403	1.7161	0	0	6.94789	0	4.43362	1.70864	2.20358	2.87444	3.3967	4.54438	1.25998	4.56433	18.2228
ENSSSCG00000002746	DHODH	dihydroorotate dehydrogenase (quinone)	10.5281	-1.72936	0.544742	-3.17465	0.00150019	0.0455189	0	25.1791	2.37117	0	30.8603	0.624764	4.16803	4.67594	1.57113	9.54198	0	13.0779	0	16.4605	15.1945	18.1384	6.8332	0	13.1105	6.02541	3.84728	11.6686	7.19501	33.4977	23.0895	25.7415	0	0	13.8958	16.4363	2.95574	8.54318	3.30538	2.87444	36.2315	6.05918	22.6797	6.52047	18.2228
ENSSSCG00000030408	DDX58	DExD/H-box helicase 58	3.35197	-1.62495	0.537466	-3.02336	0.00249987	0.061408	2.513	0	14.227	1.20325	7.71507	0.624764	2.08402	0	0	0	4.24966	1.30779	3.40792	5.76117	6.9066	1.81384	0.803906	2.87522	6.55526	1.88294	1.28243	8.23663	2.05572	3.34977	10.8656	8.58049	0	2.7671	0	4.10909	0	0	0	0	3.3967	2.52466	5.03994	0.652047	13.9351
ENSSSCG00000048933	-	-	15.5246	-1.5982	0.308477	-5.18093	2.20782e-07	9.28756e-05	8.79549	26.8577	20.1549	12.0325	20.9409	15.6191	5.83524	12.2743	23.5669	5.72519	13.8114	10.1354	18.1756	12.3454	15.1945	3.62768	11.2547	7.18805	19.6658	12.804	9.48997	6.86386	0	5.58296	8.14923	46.3346	5.46958	8.30131	17.1025	22.6	15.764	6.83454	19.8323	7.18611	22.6447	19.6923	36.5396	7.82456	63.244
ENSSSCG00000040550	CASC1	cancer susceptibility 1	3.19743	-1.58044	0.563326	-2.80554	0.00502316	0.086618	1.2565	0	13.0414	2.40649	6.61292	1.87429	2.08402	5.26043	4.71338	0	1.06242	2.61559	10.2237	5.76117	4.14396	0	3.21562	0	9.83289	1.50635	2.05188	0.686386	1.02786	4.46637	5.43282	1.7161	10.9392	2.7671	2.67226	0	2.46312	3.41727	0	1.43722	0	3.02959	5.03994	0.869395	1.07193
ENSSSCG00000031278	-	G-protein coupled receptor 183-like	9.33401	-1.55365	0.533565	-2.91183	0.00359324	0.072082	2.513	0	7.11351	14.4389	27.5538	16.2439	5.83524	14.0278	20.4246	1.9084	4.24966	10.1354	21.5835	19.7526	12.4319	0	28.1367	0	0	16.1933	18.9799	1.37277	8.22287	3.34977	9.50744	8.58049	2.73479	0	21.9126	0	29.5574	0	3.30538	1.43722	3.3967	11.6134	7.55991	6.73781	3.2158
ENSSSCG00000003040	ARHGEF1	Rho guanine nucleotide exchange factor 1	8.07794	-1.51664	0.384191	-3.94762	7.8931e-05	0.006811	6.28249	18.4647	7.11351	6.01623	7.71507	12.4953	7.91926	11.6899	14.9257	0	7.43691	4.90423	11.3597	13.9914	16.5759	3.62768	11.6566	0	3.27763	21.8421	13.8502	4.8047	5.13929	5.58296	14.9403	0	2.73479	2.7671	8.55125	2.05454	14.7787	1.70864	0	4.31166	7.92563	6.05918	11.3399	13.693	7.50353
ENSSSCG00000037950	NIPAL1	NIPA like domain containing 1	5.39927	-1.50041	0.51569	-2.90952	0.00361981	0.072082	5.02599	1.67861	2.37117	0	12.1237	7.49717	13.3377	3.50696	3.14225	0	1.06242	10.4624	2.27194	9.05326	4.14396	1.81384	7.6371	0	0	14.6869	15.3891	4.11832	1.02786	3.34977	5.43282	3.4322	2.73479	0	8.55125	2.05454	15.2713	1.70864	1.10179	0	2.26447	13.1282	5.03994	15.4318	10.7193
ENSSSCG00000017876	CYB5D2	neuferricin	7.12474	-1.43751	0.42158	-3.40982	0.000650058	0.0267877	8.79549	23.5005	16.5982	2.40649	2.20431	8.74669	5.83524	8.1829	8.6412	3.81679	2.12483	6.53897	17.0396	1.64605	16.5759	1.81384	12.0586	4.31283	0	5.64882	7.95105	3.43193	2.05572	14.5157	5.43282	8.58049	5.46958	8.30131	5.87898	8.21817	3.44837	3.41727	0	0	12.4546	5.55424	10.0799	5.86842	10.7193
ENSSSCG00000007185	SIRPB2	signal regulatory protein beta 2	4.39525	-1.38951	0.498525	-2.78725	0.00531576	0.0884151	5.02599	11.7503	3.55676	0	1.10215	3.12382	2.08402	4.67594	5.49894	1.9084	7.43691	3.92338	11.3597	2.46907	9.66925	0	4.42148	5.75044	0	4.51906	2.05188	4.8047	0	2.23318	2.71641	3.4322	0	0	6.41343	2.05454	7.38936	10.2518	0	0	5.66117	6.56411	6.29992	8.25926	15.0071
ENSSSCG00000004478	MYO6	myosin VI	3.90513	-1.38385	0.507533	-2.72662	0.00639874	0.0972171	1.2565	5.03583	3.55676	0	7.71507	4.37335	1.25041	2.92246	3.14225	0	1.06242	7.19287	2.27194	7.40721	8.28793	0	7.23515	0	9.83289	3.01271	6.41214	6.86386	1.02786	7.81614	1.35821	5.14829	0	0	6.94789	2.05454	6.89674	0	6.61075	2.87444	4.52893	4.54438	6.29992	5.21637	2.14386
ENSSSCG00000035403	RFX2	regulatory factor X2	27.1241	-1.37901	0.254327	-5.42217	5.88798e-08	3.54742e-05	22.617	55.3941	58.0937	18.0487	38.5754	14.3696	9.16967	15.7813	29.0658	9.54198	23.3731	22.5595	11.3597	56.7886	60.7781	1.81384	15.2742	21.5641	40.9704	13.5572	15.9021	26.7691	17.4736	30.148	17.6567	54.9151	27.3479	16.6026	23.5159	6.16363	20.1976	25.6295	15.4251	15.8094	72.4629	19.1874	52.9194	9.56335	51.4527
ENSSSCG00000032902	KLK7	kallikrein related peptidase 7	11.1987	-1.34933	0.400191	-3.37172	0.000747013	0.0294603	0	5.03583	2.37117	0	8.81723	23.1163	17.5057	26.8867	22.7813	0	6.37449	26.8098	20.4475	10.6993	11.0506	1.81384	23.7152	0	1.63881	30.1271	40.5247	6.86386	7.19501	2.23318	10.8656	8.58049	0	0	22.9815	6.16363	27.5869	1.70864	3.30538	4.31166	5.66117	20.7022	5.03994	18.4747	5.35966
ENSSSCG00000025349	CCDC14	coiled-coil domain containing 14	5.76991	-1.33403	0.467054	-2.85626	0.00428659	0.0799241	6.28249	18.4647	3.55676	0	2.20431	2.49906	2.50082	13.4433	4.71338	1.9084	9.56174	7.84677	13.6317	5.76117	4.14396	0	9.64687	5.75044	9.83289	9.03812	7.69457	4.11832	8.22287	0	8.14923	13.7288	0	0	9.62015	2.05454	5.91149	1.70864	1.10179	1.43722	3.3967	9.08876	3.77995	5.65107	8.57546
ENSSSCG00000024065	TMTC2	transmembrane O-mannosyltransferase targeting cadherins 2	3.92436	-1.31744	0.476413	-2.76533	0.00568645	0.0914179	2.513	0	9.48468	3.60974	5.51077	1.24953	2.50082	0	0.785563	0	8.49932	3.26949	1.13597	9.87628	5.52528	0	2.81367	0	4.91644	2.63612	1.02594	2.74554	6.16715	11.1659	8.14923	8.58049	5.46958	2.7671	3.74117	0	3.44837	3.41727	4.40717	2.87444	3.3967	3.53452	0	2.82553	15.0071
ENSSSCG00000011712	P2RY14	purinergic receptor P2Y14	24.6134	-1.30306	0.330947	-3.93738	8.23763e-05	0.00704806	51.5164	18.4647	85.3621	10.8292	28.656	2.49906	3.33442	2.33797	2.35669	32.4427	65.8698	3.26949	10.2237	54.3196	51.1089	32.6491	3.21562	7.18805	52.4421	1.50635	1.28243	34.3193	11.3064	33.4977	52.97	70.36	30.0827	11.0684	0.534453	8.21817	2.95574	3.41727	3.30538	18.6839	53.215	3.02959	52.9194	5.21637	43.9492
ENSSSCG00000002752	ZFHX3	zinc finger homeobox 3	20.5371	-1.30258	0.301942	-4.31399	1.60332e-05	0.00242015	17.591	53.7155	67.5783	15.6422	12.1237	5.62288	9.16967	9.93638	11.7834	43.8931	25.498	9.48151	10.2237	15.6375	45.5836	3.62768	10.4508	24.4394	54.0809	10.9211	10.5159	11.6686	6.16715	25.6816	27.1641	32.6059	19.1435	2.7671	12.2924	16.4363	7.88199	3.41727	4.40717	27.3072	40.7604	6.56411	36.5396	7.60721	45.0212
ENSSSCG00000010451	IFIT2	interferon induced protein with tetratricopeptide repeats 2	611.465	-1.28754	0.289995	-4.43987	9.00133e-06	0.00159434	815.467	1218.67	1535.33	469.266	855.271	181.806	323.439	277.634	260.021	137.405	812.748	150.723	851.979	983.513	1523.6	736.418	322.366	255.894	570.307	69.6688	123.37	1126.36	26.7243	870.941	1595.89	839.172	511.406	423.367	210.04	221.891	146.309	584.353	185.101	376.552	1315.66	251.456	1365.82	105.632	1215.57
ENSSSCG00000035455	FAM219A	family with sequence similarity 219 member A	3.70464	-1.26598	0.466677	-2.71276	0.00667259	0.0990743	6.28249	1.67861	4.74234	1.20325	3.30646	3.74858	2.08402	4.67594	0	3.81679	9.56174	4.90423	10.2237	1.64605	8.28793	0	1.20586	1.43761	0	3.01271	5.12971	3.43193	1.02786	7.81614	4.07462	3.4322	0	0	5.87898	2.05454	5.91149	0	5.50896	1.43722	4.52893	5.55424	6.29992	5.21637	5.35966
ENSSSCG00000010929	CYB5R1	cytochrome b5 reductase 1	5.34466	-1.26366	0.386606	-3.26861	0.00108079	0.0374969	1.2565	8.39305	4.74234	0	5.51077	1.24953	2.50082	7.59841	3.14225	5.72519	9.56174	4.25033	2.27194	5.76117	8.28793	1.81384	1.60781	7.18805	8.19407	5.27223	0.769457	0.686386	6.16715	7.81614	13.5821	5.14829	2.73479	2.7671	7.48234	4.10909	4.92624	6.83454	3.30538	5.74888	10.1901	5.55424	7.55991	5.86842	12.8632
ENSSSCG00000009075	MFSD8	major facilitator superfamily domain containing 8	5.74497	-1.26285	0.455277	-2.77381	0.00554046	0.0903658	3.76949	1.67861	9.48468	2.40649	4.40861	6.24764	8.33606	5.26043	1.57113	0	5.31208	7.84677	2.27194	3.29209	8.28793	0	10.8527	2.87522	3.27763	6.77859	7.1816	4.11832	0	18.9821	13.5821	12.0127	8.20437	5.5342	13.3613	2.05454	4.43362	6.83454	2.20358	0	1.13223	11.1085	11.3399	5.86842	2.14386
ENSSSCG00000048430	-	-	7.11324	-1.24139	0.440455	-2.81844	0.00482581	0.0850247	0	10.0717	14.227	1.20325	7.71507	9.99622	11.6705	16.3658	8.6412	3.81679	6.37449	6.53897	11.3597	5.76117	4.14396	1.81384	15.2742	8.62566	3.27763	2.25953	15.3891	6.17747	2.05572	3.34977	6.79103	3.4322	8.20437	0	8.55125	4.10909	16.7492	0	4.40717	1.43722	13.5868	14.1381	13.8598	2.82553	3.2158
ENSSSCG00000037577	CHAC2	ChaC cation transport regulator homolog 2	86.7791	-1.2402	0.183538	-6.75721	1.40678e-11	4.73428e-08	32.6689	147.718	125.672	55.3493	108.011	67.4745	45.0147	70.7236	88.7687	49.6183	131.74	48.0614	107.917	49.3814	143.657	59.8566	38.1855	47.4411	181.908	67.4093	37.4469	39.8104	48.3094	79.278	158.91	132.14	87.5133	63.6433	75.8923	71.909	56.6518	63.2195	122.299	45.9911	137	60.0868	147.418	48.0341	242.257
ENSSSCG00000031666	C11orf95	chromosome 2 C11orf95 homolog	6.28083	-1.22341	0.436466	-2.80298	0.00506321	0.0867881	7.53899	1.67861	5.92793	3.60974	4.40861	17.4934	8.33606	11.1054	6.28451	5.72519	8.49932	5.55813	12.4957	13.9914	9.66925	0	8.03906	0	13.1105	7.90835	12.8243	1.37277	4.11144	3.34977	4.07462	3.4322	2.73479	0	14.4302	8.21817	13.3008	0	2.20358	0	2.26447	6.05918	5.03994	5.86842	4.28773
ENSSSCG00000014116	MTX3	metaxin 3	9.0392	-1.19353	0.348609	-3.42371	0.000617733	0.0261327	5.02599	10.0717	10.6703	0	15.4301	13.7448	11.2537	7.59841	6.28451	3.81679	3.18725	17.6552	23.8554	9.87628	12.4319	1.81384	14.0684	4.31283	8.19407	15.4401	18.467	4.8047	5.13929	5.58296	2.71641	8.58049	16.4087	0	13.3613	4.10909	21.1828	5.12591	2.20358	4.31166	10.1901	9.08876	10.0799	11.0848	5.35966
ENSSSCG00000035420	HES4	hes family bHLH transcription factor 4	17.2389	-1.1806	0.376478	-3.1359	0.00171329	0.0492878	16.3345	23.5005	22.5261	2.40649	42.984	1.87429	0.416803	0.584493	0	19.084	3.18725	0.980846	26.1274	34.567	35.9143	39.9044	0.401953	12.9385	32.7763	0.376588	0.256486	2.05916	3.08358	40.1973	28.5223	63.4956	10.9392	8.30131	0.534453	10.2727	0	39.2986	14.3233	18.6839	36.2315	1.00986	62.9992	0.217349	15.0071
ENSSSCG00000015789	SNX25	sorting nexin 25	6.10038	-1.17856	0.424758	-2.77466	0.00552595	0.0902751	1.2565	8.39305	5.92793	1.20325	0	14.9943	7.91926	5.26043	12.569	5.72519	1.06242	8.50066	6.81583	7.40721	2.76264	3.62768	8.03906	2.87522	4.91644	4.89565	7.1816	1.37277	3.08358	14.5157	13.5821	0	5.46958	0	13.8958	6.16363	8.37461	3.41727	2.20358	4.31166	11.3223	4.03945	8.81989	10.6501	5.35966
ENSSSCG00000006904	GLMN	glomulin, FKBP associated protein	5.6535	-1.15864	0.420674	-2.75425	0.00588272	0.093237	2.513	1.67861	5.92793	10.8292	9.91938	6.24764	8.33606	2.92246	7.85563	1.9084	2.12483	11.4432	11.3597	5.76117	4.14396	0	6.8332	0	6.55526	4.14247	10.2594	0.686386	3.08358	8.93273	10.8656	1.7161	2.73479	0	9.0857	2.05454	3.94099	8.54318	2.20358	4.31166	9.05787	10.0986	10.0799	8.04191	4.28773
ENSSSCG00000004148	CCDC28A	coiled-coil domain containing 28A	75.8095	-1.09648	0.236789	-4.63062	3.64581e-06	0.000788177	40.2079	117.503	142.27	90.2434	176.345	45.6078	17.5057	72.4771	73.0574	91.603	184.86	58.8508	53.3907	21.3986	102.218	30.8352	20.0976	30.1898	75.3855	29.7505	24.3661	21.9644	45.2258	31.2646	88.2833	49.7668	21.8783	47.0407	46.4974	113	46.3067	49.5504	181.796	30.1816	120.017	53.5227	195.298	106.718	210.099
ENSSSCG00000003684	MTCL1	microtubule crosslinking factor 1	15.7225	-1.0891	0.33825	-3.21981	0.00128274	0.0415083	13.8215	30.215	46.2378	7.21947	20.9409	5.62288	6.25205	4.09145	16.4968	1.9084	8.49932	6.53897	17.0396	13.9914	12.4319	0	5.22539	14.3761	44.248	10.9211	4.10377	26.0827	16.4457	20.0986	24.4477	41.1863	13.674	22.1368	9.62015	12.3273	9.85248	3.41727	8.81433	17.2467	44.1571	7.57397	30.2396	1.73879	13.9351
ENSSSCG00000037251	-	adipogenesis associated Mth938 domain containing	9.10424	-1.08401	0.343111	-3.15936	0.00158113	0.0470889	8.79549	8.39305	15.4126	0	19.8388	12.4953	8.75286	12.2743	11.7834	15.2672	6.37449	4.90423	6.81583	23.0447	5.52528	5.44151	8.44101	4.31283	9.83289	6.77859	4.87323	4.11832	8.22287	11.1659	6.79103	17.161	5.46958	2.7671	11.2235	0	11.3304	6.83454	12.1197	4.31166	7.92563	6.05918	27.7197	3.91228	8.57546
ENSSSCG00000035507	-	uncharacterized LOC110255961	8.76003	-1.08233	0.371927	-2.91007	0.00361347	0.072082	5.02599	5.03583	9.48468	1.20325	13.2258	10.621	10.0033	8.76739	14.1401	3.81679	8.49932	20.2708	19.3115	14.8144	9.66925	10.883	18.4898	1.43761	4.91644	22.9719	22.0578	7.55025	9.25073	1.11659	14.9403	12.0127	0	2.7671	11.758	0	11.823	5.12591	0	0	3.3967	9.5937	2.51997	9.7807	5.35966
ENSSSCG00000000854	-	stabilin 2	16.7254	-1.07853	0.288196	-3.74236	0.000182297	0.0123274	15.078	72.1802	23.7117	26.4714	23.1452	4.99811	2.08402	6.42942	9.42676	15.2672	18.0611	17.9822	14.7676	18.1065	16.5759	3.62768	2.41172	20.1265	18.027	2.63612	4.87323	12.3549	4.11144	34.6143	24.4477	24.0254	5.46958	33.2052	12.2924	12.3273	6.40411	8.54318	12.1197	27.3072	23.7769	6.56411	47.8794	4.78167	16.079
ENSSSCG00000016520	CREB3L2	cAMP responsive element binding protein 3 like 2	7.83108	-1.07599	0.367225	-2.93004	0.00338916	0.0699734	2.513	13.4289	14.227	0	3.30646	5.62288	5.41844	8.1829	8.6412	5.72519	5.31208	7.84677	7.95181	5.76117	16.5759	16.3245	4.42148	1.43761	8.19407	6.402	3.33431	8.92302	8.22287	12.2825	13.5821	8.58049	0	8.30131	12.2924	4.10909	15.764	0	5.50896	4.31166	21.5124	6.05918	12.5998	6.30312	6.43159
ENSSSCG00000009720	DDX60	DExD/H-box helicase 60	71.8296	-1.06695	0.306191	-3.48458	0.000492901	0.022723	90.4678	114.145	141.085	25.2682	78.2529	6.8724	7.91926	19.8728	6.28451	51.5267	75.4315	2.94254	94.2857	74.8952	114.65	88.8781	6.02929	27.3146	121.272	1.88294	6.66862	59.0292	15.4179	217.735	244.477	240.254	46.4914	83.0131	7.48234	94.509	3.94099	148.651	71.6165	38.805	115.488	3.02959	200.338	2.60819	52.5247
ENSSSCG00000023033	PARP3	poly(ADP-ribose) polymerase family member 3	39.1449	-1.06524	0.212278	-5.01814	5.21743e-07	0.000188126	35.1819	57.0727	100.775	33.6909	51.8012	18.1182	17.0889	19.8728	10.2123	24.8091	82.8684	19.29	31.8072	37.8591	53.8715	38.0906	9.64687	18.6889	80.3019	4.14247	9.48997	44.6151	25.6965	93.7937	65.1938	37.7542	35.5523	38.7394	9.62015	41.0909	6.40411	39.2986	29.7484	22.9955	90.5787	17.1677	104.579	8.04191	61.1001
ENSSSCG00000011854	LRCH3	leucine rich repeats and calponin homology domain containing 3	11.2724	-1.06215	0.323871	-3.27954	0.00103977	0.0366359	2.513	5.03583	21.3405	9.62596	8.81723	16.2439	15.4217	22.7952	11.7834	3.81679	14.8738	10.7893	6.81583	13.9914	9.66925	19.9522	14.8723	2.87522	24.5822	12.4274	18.7234	7.55025	13.3622	24.565	21.7313	13.7288	5.46958	0	6.41343	8.21817	12.3156	3.41727	0	4.31166	16.9835	8.0789	1.25998	12.3889	12.8632
ENSSSCG00000031421	DYNLRB2	dynein light chain roadblock-type 2	14.7173	-1.06139	0.30513	-3.47849	0.000504246	0.0231403	5.02599	41.9652	23.7117	14.4389	31.9624	11.8705	5.00164	16.9503	14.9257	11.4504	9.56174	7.51982	14.7676	12.3454	20.7198	7.25535	5.22539	5.75044	36.0539	5.64882	1.53891	2.05916	9.25073	7.81614	12.2238	15.4449	13.674	11.0684	21.9126	14.3818	7.38936	18.795	30.8502	14.3722	27.1736	11.6134	25.1997	3.47758	23.5825
ENSSSCG00000001865	SCAPER	S-phase cyclin A associated protein in the ER	6.52485	-1.04794	0.380877	-2.75139	0.00593438	0.0936148	1.2565	5.03583	8.2991	3.60974	15.4301	7.49717	9.16967	4.67594	8.6412	0	6.37449	8.50066	12.4957	7.40721	6.9066	10.883	9.64687	0	3.27763	11.2976	7.43808	8.92302	3.08358	6.69955	10.8656	1.7161	8.20437	0	16.0336	0	5.91149	5.12591	1.10179	4.31166	3.3967	5.55424	6.29992	7.60721	11.7913
ENSSSCG00000015753	ANGPT2	angiopoietin 2	21.9679	-1.03918	0.29461	-3.5273	0.000419815	0.0201831	7.53899	6.71444	18.9694	18.0487	8.81723	34.9868	46.6819	59.6183	54.9894	0	10.6242	61.1394	26.1274	27.9828	6.9066	0	24.1172	1.43761	14.7493	61.3839	45.1415	8.23663	13.3622	7.81614	19.0149	24.0254	5.46958	0	33.6705	6.16363	38.9173	10.2518	9.91613	12.935	20.3802	36.86	15.1198	39.3401	19.2948
ENSSSCG00000015137	CRTAM	cytotoxic and regulatory T cell molecule	5.27438	-1.03548	0.381355	-2.71526	0.00662247	0.0987598	1.2565	5.03583	7.11351	2.40649	5.51077	4.37335	8.33606	6.42942	8.6412	0	8.49932	4.57728	6.81583	2.46907	5.52528	1.81384	8.03906	7.18805	3.27763	9.03812	8.72051	2.74554	2.05572	8.93273	6.79103	3.4322	2.73479	0	3.20672	8.21817	6.89674	8.54318	2.20358	0	5.66117	5.04931	8.81989	8.9113	6.43159
ENSSSCG00000013302	CAT	catalase	279.634	-1.035	0.243421	-4.25189	2.11975e-05	0.00289203	170.884	229.969	260.829	128.747	404.49	104.336	68.7725	159.567	143.758	269.084	486.586	153.012	118.141	113.577	613.306	268.448	92.8511	172.513	730.911	178.503	161.586	72.7569	187.07	207.686	188.791	528.558	166.822	298.847	298.225	234.218	154.191	336.601	506.824	163.843	720.1	293.365	822.77	199.961	495.233
ENSSSCG00000027070	ENTPD6	ectonucleoside triphosphate diphosphohydrolase 6	14.2077	-1.03127	0.244013	-4.22627	2.37595e-05	0.0031099	6.28249	13.4289	10.6703	6.01623	22.0431	12.4953	15.8385	13.4433	16.4968	5.72519	14.8738	17.3283	14.7676	25.5137	20.7198	0	19.6957	7.18805	18.027	16.9465	24.1096	16.4733	8.22287	10.0493	19.0149	15.4449	2.73479	8.30131	24.5848	16.4363	18.2271	8.54318	9.91613	8.62333	22.6447	17.1677	16.3798	10.4327	19.2948
ENSSSCG00000031610	-	GTPase, very large interferon inducible 1	49.3072	-1.01445	0.243335	-4.16893	3.06032e-05	0.00351102	49.0034	50.3583	103.146	37.3006	70.5378	19.9924	24.5914	20.4572	4.71338	20.9924	82.8684	26.1559	32.9432	77.3642	91.1672	52.6013	15.2742	21.5641	104.884	9.03812	5.64268	64.5203	47.2815	119.475	115.447	97.8176	71.1046	19.3697	25.1193	20.5454	7.88199	30.7554	38.5627	58.9261	93.9754	29.286	73.0791	19.5614	69.6756
ENSSSCG00000026552	MFSD14B	major facilitator superfamily domain containing 14B	136.164	-1.0144	0.20937	-4.84499	1.26615e-06	0.00036523	268.891	236.684	247.787	109.495	176.345	45.6078	67.1053	46.7594	40.0637	51.5267	281.54	33.6757	244.234	217.278	308.035	125.155	81.5964	76.1933	204.852	45.9438	31.2912	253.963	55.5044	211.036	249.91	192.203	194.17	47.0407	39.0151	65.7454	44.3362	73.4713	57.2932	94.8566	288.72	38.8797	182.698	48.9035	232.609
ENSSSCG00000042386	-	-	9.33469	-0.999551	0.367998	-2.71619	0.00660383	0.0986738	5.02599	6.71444	11.8559	2.40649	0	14.9943	18.7561	12.8588	13.3546	0	8.49932	10.7893	10.2237	4.93814	6.9066	10.883	12.0586	2.87522	4.91644	15.0635	18.9799	2.05916	6.16715	17.8655	27.1641	1.7161	0	0	12.8269	2.05454	19.705	11.9604	4.40717	10.0605	9.05787	10.6036	7.55991	16.9532	11.7913
ENSSSCG00000028201	CWF19L2	CWF19 like cell cycle control factor 2	75.2271	-0.996446	0.179958	-5.53711	3.07509e-08	2.82996e-05	40.2079	90.6449	67.5783	25.2682	117.93	35.6115	45.0147	50.8509	36.1359	82.061	115.803	47.4075	71.5662	77.3642	89.7859	74.3674	53.0578	30.1898	119.633	49.333	43.6025	26.7691	40.0865	51.3632	100.507	108.114	87.5133	80.246	65.7377	67.7999	72.4157	68.3454	112.383	41.6794	110.959	66.146	162.538	61.2924	246.544
ENSSSCG00000034802	-	receptor transporter protein 4	9.22993	-0.976965	0.330457	-2.9564	0.00311252	0.0671453	2.513	16.7861	13.0414	1.20325	18.7366	1.87429	1.25041	0.584493	0	9.54198	12.749	2.28864	12.4957	17.2835	12.4319	16.3245	0	5.75044	14.7493	0.376588	1.28243	2.05916	7.19501	32.3812	21.7313	18.8771	5.46958	16.6026	2.13781	18.4909	0	10.2518	15.4251	8.62333	12.4546	2.01973	15.1198	0.217349	9.64739
ENSSSCG00000008844	KDR	kinase insert domain receptor	64.5519	-0.974793	0.238227	-4.09187	4.2791e-05	0.00450019	101.776	102.395	173.095	70.9915	46.2904	21.242	18.3393	14.0278	42.4204	49.6183	80.7436	31.714	63.6144	73.2491	103.599	36.2768	20.9015	27.3146	154.049	43.3076	19.7494	79.6208	17.4736	71.4619	81.4923	142.436	35.5523	91.3144	44.894	51.3636	38.9173	58.0936	38.5627	61.8005	120.017	25.7515	156.238	14.5624	93.2581
ENSSSCG00000027628	IL6R	interleukin 6 receptor	116.912	-0.971169	0.264759	-3.66812	0.000244338	0.0145967	64.0814	38.608	65.2072	61.3655	66.1292	278.645	185.894	223.276	327.58	36.2595	64.8073	187.669	271.497	91.3556	96.6925	19.9522	188.918	56.0668	36.0539	251.561	155.174	94.0349	34.9472	81.5112	89.6415	34.322	43.7567	8.30131	221.798	45.1999	276.362	39.2986	23.1376	43.1166	81.5208	146.935	79.379	311.244	138.279
ENSSSCG00000020906	GHSR	TNF superfamily member 10	95.1653	-0.960689	0.233569	-4.11309	3.90401e-05	0.00427553	119.367	105.752	213.405	52.9428	104.705	29.9887	42.0971	39.7455	28.2803	57.2519	93.4926	17.9822	172.668	120.984	189.241	125.155	40.5972	54.6292	111.439	21.0889	30.5218	78.9344	23.6408	215.502	260.775	212.796	109.392	96.8486	18.7058	76.0181	33.9911	187.95	44.0717	41.6794	99.6365	26.7614	275.937	19.5614	117.913
ENSSSCG00000025485	-	chromosome 4 C1orf162 homolog	19.9737	-0.958789	0.312575	-3.06739	0.00215934	0.0560425	22.617	35.2508	34.382	34.8941	28.656	3.74858	5.00164	8.76739	20.4246	20.9924	26.5604	12.0971	47.7108	16.4605	35.9143	9.06919	8.84296	21.5641	27.8598	4.14247	4.61674	38.4376	5.13929	14.5157	25.8059	8.58049	16.4087	8.30131	5.34453	10.2727	11.823	13.6691	6.61075	10.0605	41.8926	11.1085	27.7197	17.6053	76.1072
ENSSSCG00000039161	MEIS1	Meis homeobox 1	30.6326	-0.958107	0.260712	-3.67497	0.00023788	0.0145554	21.3605	55.3941	65.2072	22.8617	23.1452	18.7429	10.8369	12.8588	26.7092	17.1756	32.9349	7.84677	14.7676	31.2749	55.2528	19.9522	12.8625	30.1898	73.7466	12.0508	9.23348	24.0235	1.02786	29.0314	36.6715	85.8049	51.961	33.2052	26.1882	30.8181	18.7197	22.2123	25.3412	44.5539	67.934	13.1282	52.9194	9.56335	47.165
ENSSSCG00000024223	ARHGEF16	Rho guanine nucleotide exchange factor 16	33.1965	-0.922694	0.282073	-3.27112	0.00107122	0.0372931	26.3865	35.2508	58.0937	6.01623	41.8818	23.1163	27.509	43.2525	29.8514	41.9847	22.3107	29.7523	52.2547	23.8677	42.8209	21.7661	21.7055	2.87522	37.6927	21.0889	25.6486	36.3785	6.16715	102.726	47.5372	34.322	43.7567	16.6026	26.7226	14.3818	17.7345	54.6763	36.3591	12.935	47.5538	38.8797	60.4793	26.9513	35.3738
ENSSSCG00000016052	MFSD6	major facilitator superfamily domain containing 6	44.8917	-0.903491	0.202696	-4.45738	8.2967e-06	0.00152297	54.0294	60.4299	61.6504	36.0974	25.3495	44.3582	32.5106	35.6541	28.2803	38.1679	50.9959	27.4637	30.6712	77.3642	52.4902	27.2076	21.3035	34.5026	81.9407	42.5545	22.5707	32.9465	15.4179	70.3453	63.8356	94.3854	30.0827	47.0407	49.1697	32.8727	35.4689	11.9604	45.1735	44.5539	95.1076	53.0178	71.8191	28.038	43.9492
ENSSSCG00000007531	FAM217B	family with sequence similarity 217 member B	55.4479	-0.899104	0.184391	-4.87608	1.08214e-06	0.000321332	41.4644	127.574	116.187	46.9266	57.312	53.1049	56.6852	48.5129	51.8472	41.9847	66.9322	34.0027	55.6626	87.2405	81.4979	27.2076	33.3621	47.4411	80.3019	49.7096	38.2163	63.8339	15.4179	63.6457	80.1341	63.4956	35.5523	105.15	43.8251	26.7091	48.7698	37.59	29.7484	28.7444	64.5373	28.7811	68.0392	45.6433	69.6756
ENSSSCG00000009896	BICDL1	BICD family like cargo adaptor 1	9.62326	-0.8982	0.326232	-2.75325	0.00590065	0.0933746	6.28249	3.35722	10.6703	2.40649	1.10215	19.9924	18.3393	9.35188	10.2123	1.9084	7.43691	14.7127	4.54389	9.05326	12.4319	3.62768	14.0684	2.87522	19.6658	11.2976	15.3891	11.6686	5.13929	4.46637	12.2238	17.161	10.9392	5.5342	12.8269	2.05454	15.2713	3.41727	6.61075	0	13.5868	15.1479	11.3399	18.4747	10.7193
ENSSSCG00000008512	TTC27	tetratricopeptide repeat domain 27	10.0893	-0.890623	0.292507	-3.04479	0.0023284	0.0580432	3.76949	18.4647	8.2991	4.81298	7.71507	17.4934	16.2553	11.6899	7.85563	0	9.56174	13.7318	10.2237	7.40721	13.8132	5.44151	15.6762	0	19.6658	16.5699	11.7983	11.6686	7.19501	23.4484	9.50744	8.58049	5.46958	5.5342	10.1546	16.4363	8.37461	8.54318	5.50896	1.43722	9.05787	12.1184	8.81989	11.7368	9.64739
ENSSSCG00000017733	C17orf75	chromosome 12 C17orf75 homolog	24.0532	-0.884791	0.236922	-3.73453	0.000188069	0.0124917	18.8475	15.1075	14.227	12.0325	15.4301	25.6153	28.3426	25.7177	29.0658	1.9084	41.4342	22.2325	34.0792	30.4519	30.3891	10.883	26.9308	8.62566	32.7763	24.8548	30.0088	36.3785	9.25073	24.565	38.0297	49.7668	24.6131	2.7671	15.4991	22.6	34.4837	15.3777	8.81433	27.3072	33.967	26.7614	20.1598	28.038	40.7334
ENSSSCG00000000299	TESPA1	thymocyte expressed, positive selection associated 1	20.548	-0.880986	0.258785	-3.40431	0.000663313	0.0271627	22.617	20.1433	42.6811	20.4552	17.6345	31.2382	20.4233	22.7952	12.569	3.81679	21.2483	26.8098	20.4475	34.567	11.0506	25.3937	28.9406	10.0633	18.027	31.6334	24.6226	17.1597	9.25073	23.4484	36.6715	15.4449	8.20437	2.7671	20.8437	4.10909	21.1828	3.41727	28.6466	7.18611	23.7769	29.286	34.0196	24.1257	24.6544
ENSSSCG00000016916	IL6ST	interleukin 6 signal transducer	101.202	-0.876526	0.204553	-4.28509	1.82666e-05	0.00261109	70.3639	87.2877	167.167	56.5525	95.8873	131.2	103.784	131.511	80.1275	40.0763	74.3691	80.4294	81.79	118.515	110.506	101.575	81.5964	23.0018	95.0512	89.2514	105.929	70.6978	79.1451	276.915	173.85	173.326	51.961	77.4789	72.6856	71.909	66.0116	148.651	96.9577	64.675	114.356	86.8482	210.417	79.9844	105.049
ENSSSCG00000000732	CRACR2A	calcium release activated channel regulator 2A	9.87021	-0.871951	0.295381	-2.95195	0.00315773	0.067582	15.078	6.71444	13.0414	9.62596	5.51077	16.2439	8.75286	14.6123	7.07007	0	14.8738	15.0396	15.9036	13.9914	6.9066	5.44151	7.23515	7.18805	14.7493	6.02541	7.1816	7.55025	4.11144	24.565	9.50744	8.58049	13.674	0	8.55125	10.2727	7.88199	10.2518	2.20358	5.74888	18.1157	9.5937	11.3399	11.0848	10.7193
ENSSSCG00000034879	MAML2	mastermind like transcriptional coactivator 2	11.4144	-0.869944	0.316113	-2.75201	0.00592315	0.0935839	13.8215	5.03583	16.5982	4.81298	11.0215	18.7429	11.6705	23.9642	10.9979	5.72519	30.81	12.751	11.3597	12.3454	12.4319	5.44151	14.0684	7.18805	24.5822	10.1679	12.3113	6.17747	5.13929	2.23318	8.14923	30.8898	16.4087	2.7671	14.4302	8.21817	7.38936	13.6691	3.30538	2.87444	10.1901	14.643	10.0799	7.38986	5.35966
ENSSSCG00000011946	ALCAM	activated leukocyte cell adhesion molecule	13.5746	-0.866768	0.291408	-2.97442	0.00293546	0.0658587	21.3605	6.71444	23.7117	14.4389	7.71507	15.6191	4.58483	5.26043	10.2123	3.81679	24.4356	3.92338	21.5835	24.6907	27.6264	29.0214	8.84296	12.9385	19.6658	8.28494	4.87323	8.92302	3.08358	18.9821	28.5223	25.7415	21.8783	0	9.62015	6.16363	4.43362	1.70864	9.91613	12.935	14.719	6.05918	27.7197	7.17251	22.5106
ENSSSCG00000008887	NAF1	nuclear assembly factor 1 ribonucleoprotein	8.81472	-0.863676	0.30884	-2.79651	0.00516572	0.087887	5.02599	11.7503	8.2991	4.81298	9.91938	13.12	9.58647	16.3658	7.07007	0	2.12483	7.84677	10.2237	7.40721	9.66925	3.62768	8.44101	2.87522	14.7493	10.1679	14.6197	11.6686	4.11144	11.1659	10.8656	10.2966	5.46958	5.5342	15.4991	0	11.3304	5.12591	5.50896	11.4978	7.92563	15.1479	16.3798	7.82456	10.7193
ENSSSCG00000022961	CLMP	CXADR like membrane protein	37.9831	-0.860143	0.269823	-3.18781	0.00143356	0.0446705	49.0034	53.7155	43.8666	21.6584	20.9409	17.4934	9.58647	22.7952	19.6391	7.63358	45.6839	14.0588	31.8072	62.5498	82.8793	18.1384	12.0586	31.6274	70.469	21.8421	12.8243	61.7747	1.02786	61.4125	76.0595	73.7922	51.961	35.9723	17.6369	30.8181	22.1681	22.2123	42.9699	61.8005	104.165	13.6331	65.5192	13.4756	54.6685
ENSSSCG00000010176	C1orf131	chromosome 14 C1orf131 homolog	12.8525	-0.855159	0.28912	-2.9578	0.00309846	0.0670471	8.79549	13.4289	18.9694	12.0325	11.0215	21.8667	15.4217	19.8728	9.42676	3.81679	6.37449	22.2325	22.7194	7.40721	13.8132	10.883	26.9308	4.31283	24.5822	15.4401	18.2105	7.55025	5.13929	15.6323	23.0895	10.2966	13.674	2.7671	23.5159	6.16363	21.6755	3.41727	6.61075	4.31166	2.26447	15.6529	8.81989	12.3889	10.7193
ENSSSCG00000004464	TENT5A	terminal nucleotidyltransferase 5A	13.0594	-0.854282	0.284014	-3.00789	0.00263068	0.0622816	23.8735	6.71444	18.9694	10.8292	15.4301	15.6191	12.5041	15.1968	8.6412	11.4504	23.3731	7.51982	15.9036	12.3454	23.4825	7.25535	10.4508	12.9385	8.19407	9.79129	10.7724	12.3549	6.16715	24.565	21.7313	8.58049	10.9392	0	8.01679	20.5454	10.8377	3.41727	5.50896	4.31166	13.5868	7.06904	15.1198	15.6491	39.6615
ENSSSCG00000036639	STOM	stomatin	155.117	-0.846348	0.244221	-3.46549	0.000529257	0.0237218	167.114	169.54	392.429	147.999	65.027	34.9868	42.0971	33.3161	45.5627	129.771	265.604	36.2913	253.322	144.029	428.209	139.666	24.1172	127.947	140.938	45.5672	26.1615	248.472	72.978	145.157	340.909	111.546	131.27	201.998	61.9965	90.3999	36.9468	150.36	105.772	194.025	329.48	67.6608	158.758	90.4171	651.735
ENSSSCG00000015102	CCDC84	coiled-coil domain containing 84	28.1354	-0.845709	0.226888	-3.72744	0.000193437	0.0127643	8.79549	25.1791	7.11351	14.4389	27.5538	22.4915	19.5897	22.2107	19.6391	15.2672	24.4356	9.15456	39.759	69.134	26.2451	21.7661	20.0976	5.75044	26.221	24.8548	18.9799	24.7099	27.7522	40.1973	47.5372	80.6566	62.9002	19.3697	28.8605	32.8727	17.2418	20.5036	20.934	17.2467	45.2893	18.6825	47.8794	21.3002	54.6685
ENSSSCG00000001201	ZKSCAN8	zinc finger with KRAB and SCAN domains 8	12.657	-0.835125	0.30519	-2.73641	0.00621135	0.0955942	3.76949	8.39305	20.1549	3.60974	7.71507	24.9906	19.5897	22.7952	16.4968	0	14.8738	11.1163	24.9914	10.6993	17.9572	19.9522	12.0586	1.43761	4.91644	22.9719	25.1356	7.55025	13.3622	13.3991	9.50744	15.4449	8.20437	8.30131	22.9815	10.2727	12.3156	1.70864	9.91613	4.31166	13.5868	18.1775	13.8598	11.7368	5.35966
ENSSSCG00000039562	TDRP	testis development related protein	12.2432	-0.833648	0.264612	-3.15046	0.00163015	0.0479826	8.79549	33.5722	29.6396	15.6422	11.0215	9.37146	2.08402	14.0278	9.42676	9.54198	31.8725	9.15456	7.95181	14.8144	6.9066	7.25535	6.43125	23.0018	13.1105	7.90835	3.5908	9.60941	3.08358	12.2825	6.79103	22.3093	5.46958	16.6026	8.01679	18.4909	8.86723	5.12591	6.61075	11.4978	12.4546	4.54438	22.6797	4.34698	23.5825
ENSSSCG00000016053	NEMP2	nuclear envelope integral membrane protein 2	20.7791	-0.820196	0.270227	-3.03521	0.00240368	0.0594792	12.565	35.2508	53.3513	9.62596	17.6345	7.49717	15.0049	9.35188	8.6412	17.1756	31.8725	10.1354	12.4957	25.5137	27.6264	34.4629	6.43125	5.75044	26.221	12.4274	13.5937	19.9052	16.4457	53.5964	74.7013	24.0254	8.20437	30.4381	13.3613	16.4363	11.3304	34.1727	12.1197	17.2467	20.3802	19.6923	23.9397	7.82456	13.9351
ENSSSCG00000037735	-	hydroxycarboxylic acid receptor 2	52.3271	-0.816922	0.271758	-3.00607	0.00264647	0.0622816	81.6724	45.3224	144.641	21.6584	42.984	21.8667	12.9209	19.8728	25.9236	28.6259	42.4966	15.3666	55.6626	55.9656	142.276	136.038	14.4703	31.6274	58.9973	16.1933	11.0289	87.171	21.585	80.3946	133.104	82.3727	27.3479	44.2736	12.8269	20.5454	8.86723	56.385	38.5627	35.9305	95.1076	11.6134	114.659	24.3431	120.056
ENSSSCG00000040007	PIGV	phosphatidylinositol glycan anchor biosynthesis class V	9.38836	-0.810696	0.28366	-2.85799	0.00426334	0.079875	5.02599	6.71444	13.0414	6.01623	12.1237	8.74669	6.25205	7.01391	16.4968	1.9084	7.43691	11.4432	11.3597	14.8144	17.9572	12.6969	11.6566	1.43761	11.4717	5.27223	8.46402	8.92302	4.11144	6.69955	9.50744	13.7288	10.9392	8.30131	7.48234	4.10909	7.88199	10.2518	12.1197	5.74888	20.3802	8.58383	12.5998	4.56433	12.8632
ENSSSCG00000028561	CD28	CD28 molecule	22.1294	-0.810231	0.276605	-2.9292	0.0033984	0.0700209	7.53899	10.0717	32.0108	9.62596	25.3495	23.1163	28.3426	23.3797	14.1401	36.2595	16.9986	49.0423	20.4475	25.5137	20.7198	16.3245	21.3035	4.31283	6.55526	29.3739	23.8532	9.60941	11.3064	63.6457	31.2387	48.0507	21.8783	8.30131	30.4638	12.3273	19.2123	22.2123	14.3233	15.8094	23.7769	21.712	21.4197	28.4727	15.0071
ENSSSCG00000005994	SNTB1	syntrophin beta 1	52.1044	-0.808406	0.200377	-4.03443	5.47347e-05	0.00541766	81.6724	78.8946	78.2486	61.3655	58.4141	33.1125	33.761	14.6123	16.4968	20.9924	65.8698	18.963	68.1583	83.9484	100.836	50.7875	25.725	54.6292	55.7197	28.6207	22.0578	75.5025	22.6129	79.278	114.089	82.3727	73.8394	22.1368	17.1025	43.1454	20.1976	46.1331	19.8323	27.3072	96.2398	13.6331	78.1191	26.5166	121.128
ENSSSCG00000015549	RNASEL	ribonuclease L	36.2977	-0.802877	0.223918	-3.58558	0.000336326	0.0177777	85.4419	72.1802	60.4648	26.4714	29.7581	19.3677	18.3393	14.0278	14.1401	13.3588	56.308	13.7318	42.031	65.8419	87.0232	32.6491	15.6762	34.5026	24.5822	6.02541	8.72051	38.4376	17.4736	46.8968	86.9251	41.1863	27.3479	16.6026	11.758	55.4727	8.37461	35.8813	18.7305	40.2422	64.5373	16.6627	55.4393	12.6062	80.3949
ENSSSCG00000046224	-	-	59.6777	-0.800982	0.183411	-4.36715	1.25881e-05	0.00204982	41.4644	87.2877	56.9081	51.7395	111.317	57.4783	25.0082	38.5765	44.7771	43.8931	104.117	27.7906	99.9656	42.7972	98.0738	68.9258	41.8031	69.0053	68.8302	41.0481	24.3661	31.5738	23.6408	55.8296	78.7759	111.546	79.3089	41.5065	41.1529	59.5817	27.5869	46.1331	78.2272	34.4933	58.8761	44.9389	99.5388	29.1247	140.423
ENSSSCG00000027516	CIR1	corepressor interacting with RBPJ, 1	265.769	-0.800976	0.238498	-3.35841	0.00078391	0.0302906	158.319	295.435	228.818	209.365	429.84	94.9641	85.4446	204.572	172.824	322.519	444.09	170.013	224.922	206.579	284.552	224.916	102.498	99.195	206.491	72.6815	84.6402	61.0884	77.0894	110.543	267.566	425.592	303.562	251.806	189.731	394.472	161.581	290.468	710.656	176.778	518.563	140.876	922.309	99.5458	940.085
ENSSSCG00000021803	RANBP10	RAN binding protein 10	873.286	-0.799311	0.181852	-4.3954	1.10569e-05	0.00186051	402.079	1116.28	1103.78	555.899	1347.93	357.365	401.798	759.256	718.79	1192.75	1375.83	718.96	993.976	766.235	1044.28	796.275	324.778	493.1	1465.1	370.563	373.187	241.608	444.035	799.479	998.281	1534.19	820.437	1461.03	587.364	840.308	537.945	1047.39	1488.52	623.754	1167.33	615.006	1726.18	509.031	1938.05
ENSSSCG00000009650	DOCK5	dedicator of cytokinesis 5	54.6755	-0.796076	0.280155	-2.84156	0.00448936	0.0821098	79.1594	58.7513	48.609	63.772	56.2098	98.7127	64.1877	64.2942	60.4884	9.54198	87.1181	40.2147	76.1101	65.0189	109.124	14.5107	63.1066	35.9402	91.7736	84.7323	56.1703	80.9936	27.7522	22.3318	65.1938	24.0254	43.7567	33.2052	52.9108	32.8727	56.6518	1.70864	15.4251	31.6189	87.182	50.9981	36.5396	73.0292	68.6037
ENSSSCG00000006802	KCNA3	potassium voltage-gated channel subfamily A member 3	44.3311	-0.7942	0.201043	-3.95039	7.80233e-05	0.00681072	23.8735	50.3583	43.8666	40.9103	34.1667	61.2269	66.6885	74.2306	43.206	3.81679	31.8725	61.4663	38.6231	46.0893	45.5836	14.5107	42.607	14.3761	58.9973	68.1625	64.6344	40.4968	20.5572	68.1121	51.6118	54.9151	71.1046	33.2052	48.1008	24.6545	38.9173	23.9209	13.2215	38.805	44.1571	45.4438	74.3391	65.2047	42.8773
ENSSSCG00000001983	SDR39U1	short chain dehydrogenase/reductase family 39U member 1	11.8278	-0.784834	0.266003	-2.95047	0.00317293	0.067582	5.02599	20.1433	24.8973	3.60974	13.2258	8.74669	6.66885	6.42942	9.42676	1.9084	7.43691	13.4049	15.9036	20.5756	15.1945	12.6969	9.24492	15.8137	16.3881	9.4147	5.89917	6.17747	8.22287	11.1659	13.5821	13.7288	21.8783	5.5342	14.4302	14.3818	5.91149	20.5036	7.71254	5.74888	10.1901	9.5937	23.9397	11.5195	15.0071
ENSSSCG00000037583	GNB4	G protein subunit beta 4	44.4899	-0.784308	0.268554	-2.92049	0.00349484	0.0707119	69.1074	77.216	61.6504	44.5201	54.0055	34.9868	45.8483	38.5765	32.9937	3.81679	79.6812	30.4062	23.8554	54.3196	74.5913	39.9044	40.1953	48.8787	24.5822	21.4655	24.1096	77.5616	13.3622	73.695	57.0446	60.0634	49.2262	8.30131	31.5327	39.0363	35.9616	5.12591	28.6466	38.805	76.9919	26.7614	59.2193	31.5156	97.5458
ENSSSCG00000003570	WDTC1	WD and tetratricopeptide repeats 1	224.564	-0.779608	0.161314	-4.83287	1.34581e-06	0.000377424	129.419	275.292	230.004	168.454	401.184	145.57	136.711	161.904	150.828	202.29	309.163	146.146	353.287	162.136	248.638	175.942	108.929	189.764	357.261	125.78	106.698	150.319	120.26	265.749	391.163	616.079	218.783	271.176	233.556	240.382	167.492	189.658	274.346	182.527	189.083	222.17	244.437	122.367	373.032
ENSSSCG00000006059	NCALD	neurocalcin delta	15.3496	-0.778816	0.262939	-2.96197	0.0030568	0.0670471	8.79549	8.39305	16.5982	4.81298	11.0215	27.4896	24.1746	26.3022	16.4968	1.9084	7.43691	18.3091	13.6317	19.7526	13.8132	10.883	26.1269	0	22.9434	25.608	27.444	8.92302	16.4457	21.2152	17.6567	13.7288	2.73479	5.5342	21.3781	14.3818	27.5869	11.9604	18.7305	4.31166	12.4546	10.0986	26.4597	21.3002	11.7913
ENSSSCG00000023866	ACSF3	acyl-CoA synthetase family member 3	21.0644	-0.777903	0.228681	-3.4017	0.000669686	0.0271665	15.078	8.39305	17.7838	3.60974	15.4301	16.8686	36.6787	23.9642	29.0658	13.3588	18.0611	35.3105	27.2633	19.7526	19.3385	16.3245	26.5289	5.75044	31.1375	22.9719	32.3172	13.7277	24.6686	22.3318	25.8059	36.0381	19.1435	5.5342	46.4974	14.3818	26.6017	11.9604	6.61075	14.3722	18.1157	24.2367	35.2796	19.7787	21.4386
ENSSSCG00000012890	TCIRG1	T cell immune regulator 1, ATPase H+ transporting V0 subunit a3	51.5283	-0.772312	0.269575	-2.86493	0.00417103	0.0792118	90.4678	94.0021	65.2072	66.1785	61.7206	37.4858	11.2537	22.2107	25.138	57.2519	111.554	11.4432	114.733	153.905	147.801	16.3245	14.8723	107.821	52.4421	28.6207	15.6456	85.7983	38.0308	39.0807	86.9251	51.4829	38.2871	11.0684	19.7748	53.4181	12.8082	11.9604	30.8502	17.2467	38.4959	16.1578	39.0595	23.039	90.0423
ENSSSCG00000046640	OAS1	2'-5'-oligoadenylate synthetase 1	115.94	-0.770475	0.235526	-3.2713	0.00107055	0.0372931	341.767	293.757	304.695	56.5525	259.006	25.6153	34.5947	26.3022	33.7792	127.863	186.985	11.7702	119.277	248.553	276.264	177.756	27.7347	135.135	131.105	9.4147	16.928	173.656	27.7522	145.157	267.566	133.856	114.861	91.3144	6.41343	67.7999	7.88199	68.3454	33.0538	71.8611	133.604	15.1479	158.758	5.43372	154.358
ENSSSCG00000047776	-	-	22.6545	-0.768206	0.245069	-3.13465	0.00172058	0.0493494	41.4644	47.0011	58.0937	22.8617	54.0055	12.4953	4.16803	7.59841	9.42676	7.63358	39.3094	10.1354	11.3597	41.9742	17.9572	30.8352	7.6371	28.7522	42.6092	6.402	6.92511	33.6329	8.22287	48.0134	42.1044	29.1737	46.4914	8.30131	2.67226	20.5454	4.43362	8.54318	7.71254	14.3722	22.6447	3.02959	26.4597	5.65107	42.8773
ENSSSCG00000014171	ERAP1	endoplasmic reticulum aminopeptidase 1	123.708	-0.7621	0.128448	-5.93314	2.97194e-09	7.50117e-06	118.111	159.468	177.838	105.886	106.909	139.947	114.621	144.37	138.259	36.2595	137.052	116.721	160.172	128.392	128.463	105.203	115.36	70.4429	144.216	136.325	128.243	116.686	96.6187	215.502	181.999	185.339	120.331	83.0131	118.114	100.673	99.0174	93.9749	69.4129	51.74	112.091	108.055	195.298	104.762	159.718
ENSSSCG00000010862	CDC42BPA	CDC42 binding protein kinase alpha	39.5708	-0.762069	0.275389	-2.76725	0.00565313	0.091027	54.0294	68.823	84.1765	34.8941	38.5754	19.3677	13.3377	32.7316	24.3525	7.63358	50.9959	24.1942	22.7194	73.2491	77.354	25.3937	30.9504	38.8155	80.3019	24.8548	16.4151	77.5616	13.3622	49.13	36.6715	53.199	60.1654	33.2052	31.5327	28.7636	16.2566	3.41727	14.3233	51.74	60.0084	31.8107	78.1191	11.5195	49.3089
ENSSSCG00000031354	DMAC2L	distal membrane arm assembly complex 2 like	11.6966	-0.760128	0.260036	-2.92317	0.00346489	0.0703853	10.052	15.1075	11.8559	13.2357	19.8388	11.2458	5.41844	13.4433	10.2123	15.2672	13.8114	3.92338	10.2237	8.23024	13.8132	7.25535	3.61758	7.18805	13.1105	5.64882	5.12971	6.17747	8.22287	20.0986	13.5821	17.161	5.46958	19.3697	6.41343	2.05454	12.3156	13.6691	15.4251	12.935	19.248	14.1381	25.1997	3.47758	23.5825
ENSSSCG00000016050	INPP1	inositol polyphosphate-1-phosphatase	13.904	-0.758349	0.276636	-2.74133	0.00611919	0.0950451	18.8475	38.608	20.1549	3.60974	13.2258	15.6191	13.7545	9.93638	14.9257	22.9008	7.43691	13.4049	21.5835	14.8144	8.28793	10.883	11.6566	7.18805	26.221	17.3231	7.95105	8.23663	13.3622	33.4977	21.7313	15.4449	13.674	5.5342	4.27562	4.10909	12.3156	11.9604	13.2215	5.74888	22.6447	7.57397	7.55991	6.95516	16.079
ENSSSCG00000004541	FECH	ferrochelatase	5853.73	-0.756006	0.182653	-4.13903	3.48779e-05	0.00395648	2869.84	6939.37	8373.79	3630.19	7113.3	3473.69	2238.23	4491.83	3723.57	5261.45	8704.37	3155.05	5435.63	2069.9	5059.78	3473.5	2206.72	3631.4	7590.99	1730.42	1502.75	1854.62	3152.44	5062.63	6107.85	8333.37	6683.83	9303	4975.76	6860.12	3437.04	7629.06	13149.9	5536.18	10814	7450.26	13154.2	3066.14	19049.3
ENSSSCG00000007530	PPP1R3D	protein phosphatase 1 regulatory subunit 3D	102.843	-0.755304	0.269351	-2.80416	0.00504471	0.086618	168.371	125.896	253.715	109.495	74.9464	73.0974	45.0147	47.3439	94.2676	38.1679	175.299	51.3309	96.5576	178.596	149.183	34.4629	46.2246	139.448	229.434	82.4728	41.0377	163.36	28.7801	68.1121	107.298	75.5083	98.4525	138.355	83.3746	57.5272	76.3567	25.6295	44.0717	145.159	228.711	36.3551	141.118	44.3392	194.02
ENSSSCG00000006382	SLAMF6	SLAM family member 6	78.2388	-0.752447	0.203855	-3.69109	0.000223292	0.0137461	106.802	125.896	162.425	73.398	100.296	49.9811	63.7709	39.7455	24.3525	45.8015	129.615	38.5799	93.1497	120.161	149.183	79.8089	44.2148	63.2548	95.0512	43.3076	50.7841	153.064	29.8079	130.641	96.4326	96.1015	144.944	19.3697	40.6184	32.8727	32.5132	68.3454	29.7484	47.4283	76.9919	44.434	138.598	33.6891	136.135
ENSSSCG00000033613	FOXS1	forkhead box S1	170.839	-0.745787	0.237826	-3.13585	0.00171355	0.0492878	255.069	209.826	454.079	102.276	138.871	33.7373	60.4364	68.9701	48.7049	103.053	190.172	59.8316	197.659	272.421	299.747	282.959	69.5378	63.2548	176.992	25.2314	39.2423	295.832	79.1451	444.403	384.372	350.084	175.027	224.135	36.8772	86.2908	48.7698	249.461	110.179	104.917	258.149	69.6805	420.835	41.731	130.776
ENSSSCG00000032241	GPNMB	glycoprotein nmb	94.1954	-0.741807	0.223125	-3.32462	0.000885391	0.0332431	62.8249	114.145	82.991	90.2434	144.382	34.9868	42.5139	50.8509	54.2039	120.229	150.863	61.4663	98.8296	111.931	96.6925	99.7611	45.0187	57.5044	62.2749	50.8394	31.0348	43.9287	18.5015	52.4798	152.119	154.449	71.1046	174.327	61.9965	92.4544	30.0501	107.644	190.61	54.6144	151.719	80.789	163.798	44.9912	364.457
ENSSSCG00000016475	-	-	42.2251	-0.73942	0.198523	-3.7246	0.000195623	0.0128247	26.3865	38.608	50.9802	13.2357	42.984	96.8384	58.7692	97.6103	73.0574	28.6259	26.5604	54.9274	34.0792	21.3986	31.7704	19.9522	55.8714	2.87522	31.1375	85.4855	77.7151	17.1597	30.8358	39.0807	38.0297	34.322	35.5523	5.5342	51.3075	20.5454	100.003	27.3382	18.7305	22.9955	29.4381	38.8797	30.2396	99.3284	38.5896
ENSSSCG00000010450	LIPA	lipase A, lysosomal acid type	26.4498	-0.734898	0.19757	-3.71969	0.000199469	0.0128285	11.3085	21.8219	33.1964	19.2519	27.5538	22.4915	38.3459	31.5626	25.9236	15.2672	22.3107	26.4828	20.4475	26.3368	24.8638	34.4629	40.9992	11.5009	26.221	21.8421	34.6256	13.7277	13.3622	46.8968	25.8059	22.3093	5.46958	8.30131	53.9797	22.6	47.2919	34.1727	26.443	14.3722	33.967	31.8107	32.7596	26.0819	35.3738
ENSSSCG00000006923	GBP2	guanylate binding protein 2, interferon-inducible	224.175	-0.731527	0.229007	-3.19435	0.00140148	0.043942	579.246	325.65	526.4	187.706	313.012	29.9887	39.5963	59.6183	33.7792	238.55	555.643	42.8303	131.773	440.318	390.914	192.267	32.1562	135.135	272.043	27.1143	20.0059	329.465	69.8944	437.704	551.431	411.863	358.258	113.451	21.9126	182.854	19.2123	312.68	123.401	153.783	391.753	39.8896	410.755	16.7359	224.034
ENSSSCG00000028978	CAD	carbamoyl-phosphate synthetase 2, aspartate transcarbamylase, and dihydroorotase	42.3787	-0.730025	0.190586	-3.83042	0.000127924	0.00935884	13.8215	41.9652	52.1657	8.42272	37.4732	55.604	65.8549	52.0199	35.3503	0	24.4356	44.792	39.759	47.7354	63.5408	23.5799	56.6754	20.1265	57.3585	59.1243	80.28	52.8517	43.1701	58.0628	62.4774	48.0507	46.4914	11.0684	50.773	18.4909	53.2034	44.4245	38.5627	27.3072	27.1736	42.9192	46.6194	51.729	49.3089
ENSSSCG00000005951	TMEM71	transmembrane protein 71	52.14	-0.72215	0.210951	-3.42331	0.000618632	0.0261327	28.8995	20.1433	22.5261	22.8617	23.1452	139.322	89.6127	107.547	106.051	17.1756	44.6215	75.8521	69.2943	61.7268	26.2451	14.5107	77.1749	31.6274	39.3315	143.103	78.9976	33.6329	23.6408	40.1973	28.5223	22.3093	19.1435	16.6026	97.2704	14.3818	88.6723	18.795	28.6466	11.4978	36.2315	89.3728	55.4393	139.321	30.0141
ENSSSCG00000020666	EHD4	EH domain containing 4	201.058	-0.719259	0.215755	-3.33368	0.000857039	0.0327752	198.527	498.547	534.699	299.608	177.447	105.585	52.1004	89.4274	131.189	108.779	294.289	97.4307	127.229	137.445	319.085	230.357	56.6754	189.764	406.426	61.7605	41.0377	186.697	54.4765	297.013	285.223	322.626	188.701	362.49	101.546	191.072	104.436	134.982	181.796	238.579	373.637	75.7397	361.616	34.5585	188.66
ENSSSCG00000023862	MTMR8	myotubularin related protein 8	126.318	-0.716167	0.167392	-4.27838	1.88256e-05	0.00263977	84.1854	302.15	168.353	120.325	229.248	125.578	26.6754	67.8012	68.344	164.122	254.98	104.951	56.7986	68.311	104.98	94.3196	31.3523	112.134	93.4124	26.3612	35.1385	37.7512	76.0616	98.26	77.4177	139.004	87.5133	179.862	147.509	184.909	82.7608	112.77	202.73	102.043	199.273	148.45	312.476	77.5935	320.508
ENSSSCG00000005078	DAAM1	dishevelled associated activator of morphogenesis 1	52.3434	-0.713626	0.205227	-3.47726	0.000506564	0.0231415	54.0294	94.0021	133.971	43.3168	47.3926	19.3677	12.9209	22.2107	45.5627	34.3511	45.6839	25.175	65.8864	99.5859	62.1594	48.9736	28.1367	35.9402	106.523	29.3739	16.4151	56.97	17.4736	98.26	52.97	60.0634	62.9002	71.9447	20.8437	57.5272	23.1533	46.1331	52.886	64.675	113.223	25.7515	75.5991	11.0848	58.9563
ENSSSCG00000013094	DDB1	damage specific DNA binding protein 1	220.304	-0.712211	0.122241	-5.8263	5.66682e-09	9.53537e-06	165.858	209.826	180.209	200.942	365.915	140.572	146.715	198.143	176.752	145.038	226.295	182.11	290.809	251.845	274.883	195.894	157.164	119.322	385.121	192.06	155.943	125.609	163.43	301.48	275.716	356.948	153.148	174.327	208.971	219.836	197.05	182.824	344.861	206.96	242.298	150.47	345.236	195.397	385.896
ENSSSCG00000024481	-	myomegalin	73.0655	-0.71169	0.241416	-2.94798	0.0031986	0.0678764	70.3639	184.647	148.198	95.0564	35.2689	46.8573	42.9307	42.0835	47.9194	43.8931	65.8698	51.004	26.1274	65.0189	111.887	43.5321	40.5972	58.942	175.353	44.4374	41.5507	98.8396	33.9193	99.3766	67.9103	118.411	95.7177	107.917	53.9797	71.909	53.2034	25.6295	40.7663	57.4888	181.157	43.929	105.839	24.1257	87.8984
ENSSSCG00000032652	-	schlafen family member 11	89.9093	-0.711038	0.233222	-3.04875	0.00229793	0.0578204	150.78	99.0379	122.115	90.2434	77.1507	15.6191	56.2684	29.8091	21.9958	26.7175	158.3	16.6744	74.9742	162.136	232.062	88.8781	38.5875	106.383	67.1914	19.5826	21.0318	181.892	54.4765	108.309	168.417	157.881	114.861	66.4105	33.1361	82.1817	29.0648	41.0072	56.1914	70.4238	192.48	32.3156	194.038	16.3012	231.537
ENSSSCG00000014060	KIAA1191	KIAA1191 ortholog	324.813	-0.708915	0.137443	-5.15788	2.49763e-07	0.00010023	252.556	387.759	545.369	234.633	386.856	265.525	194.23	276.465	271.019	270.992	428.153	161.84	269.225	260.075	339.805	246.682	192.133	254.457	616.194	260.599	180.053	186.011	189.126	315.995	427.835	554.3	339.114	442.736	355.411	252.709	241.878	295.594	427.495	261.574	341.934	303.969	472.494	296.029	668.886
ENSSSCG00000011402	IFRD2	interferon related developmental regulator 2	180.281	-0.707715	0.198221	-3.57033	0.000356534	0.0184443	135.702	246.756	231.189	170.861	190.673	153.692	100.033	139.109	157.113	112.595	210.358	153.339	237.418	79.0103	221.011	152.362	106.518	169.638	334.318	94.5236	56.1703	72.7569	93.5352	218.852	161.626	315.762	175.027	379.093	257.606	98.6181	111.826	164.029	245.7	120.727	176.628	196.923	279.717	86.7222	423.413
ENSSSCG00000011679	ATR	ATR serine/threonine kinase	21.9291	-0.706965	0.204251	-3.46125	0.000537671	0.0238226	13.8215	15.1075	26.0829	18.0487	20.9409	22.4915	35.8451	30.9781	25.138	5.72519	20.1859	30.0793	31.8072	35.39	22.1011	12.6969	32.5582	5.75044	29.4987	34.6461	31.5477	25.3963	13.3622	37.9641	23.0895	20.5932	13.674	5.5342	10.1546	6.16363	25.6165	23.9209	15.4251	20.1211	28.3058	26.2564	20.1598	18.692	20.3667
ENSSSCG00000007116	CD93	CD93 molecule	124.57	-0.706929	0.222344	-3.17944	0.00147562	0.0455189	95.4938	273.613	206.292	140.78	170.834	54.3545	43.3475	70.7236	102.909	120.229	113.678	92.1995	115.869	186.826	149.183	67.112	55.0675	117.884	301.542	52.7223	41.8071	178.46	17.4736	211.036	86.9251	192.203	98.4525	229.669	75.3579	176.691	59.1149	97.3922	109.077	97.731	257.017	57.0572	192.778	38.9054	110.409
ENSSSCG00000004195	ARG1	arginase 1	4445.78	-0.703009	0.161623	-4.34968	1.36335e-05	0.00218483	2977.9	6462.65	6760.21	3585.67	5388.43	3145.06	1984.4	3283.1	4056.65	6543.89	6078.08	2587.8	5043.72	2947.25	4663.34	3868.92	1739.65	3749.29	6427.43	2375.89	1427.86	1583.49	2334.27	5182.1	4359.84	6975.94	3888.87	7003.54	4461.61	3400.27	2592.68	5267.72	6690.08	3092.9	6289.56	4764.53	9664.08	1657.5	9079.27
ENSSSCG00000010787	SCART1	scavenger receptor cysteine-rich domain-containing protein SCART1-like	27.6935	-0.701866	0.254478	-2.75807	0.00581445	0.0927372	13.8215	8.39305	43.8666	12.0325	29.7581	41.2344	42.9307	46.1749	62.0595	11.4504	29.7476	31.0601	15.9036	31.2749	31.7704	21.7661	47.0285	15.8137	11.4717	39.5418	31.8042	31.5738	7.19501	10.0493	27.1641	37.7542	24.6131	16.6026	35.8083	20.5454	68.4747	17.0864	4.40717	12.935	30.5703	25.2466	32.7596	34.7758	23.5825
ENSSSCG00000011239	TRANK1	tetratricopeptide repeat and ankyrin repeat containing 1	455.092	-0.698959	0.18616	-3.75462	0.000173605	0.0119744	733.795	713.409	819.239	465.656	566.507	167.437	240.495	192.883	102.909	171.756	673.571	149.089	530.499	706.154	939.298	491.55	193.741	537.666	499.838	119.755	152.865	864.846	146.984	743.65	810.848	633.24	484.058	235.204	125.062	466.381	131.531	396.403	348.166	390.924	823.134	159.558	742.131	126.497	951.876
ENSSSCG00000010606	SLK	STE20 like kinase	113.1	-0.693752	0.186712	-3.71563	0.000202695	0.0129519	123.137	189.683	181.395	105.886	77.1507	76.846	60.0196	80.0755	75.4141	24.8091	160.425	91.5456	86.3339	130.038	140.895	83.4365	69.9398	107.821	149.132	85.4855	72.3289	197.679	60.6437	167.489	146.686	180.19	87.5133	121.752	92.4603	88.3453	74.3862	58.0936	74.9218	132.224	258.149	104.016	160.018	61.9444	172.581
ENSSSCG00000006287	SELL	selectin L	745.589	-0.690978	0.248694	-2.77842	0.00546233	0.0896711	819.237	788.946	992.335	883.182	720.808	642.257	677.305	724.771	596.243	446.565	1425.76	438.765	1283.65	1207.38	1334.36	341.002	533.391	1211.9	444.119	685.767	493.735	1571.14	268.271	409.789	846.162	494.236	689.167	329.285	587.898	349.272	582.282	269.964	358.082	488.655	1125.44	526.138	648.892	873.742	1968.07
ENSSSCG00000034569	-	obscurin, cytoskeletal calmodulin and titin-interacting RhoGEF	28.8587	-0.690466	0.246206	-2.80442	0.00504071	0.086618	15.078	23.5005	27.2685	14.4389	19.8388	61.8516	47.5155	46.1749	31.4225	5.72519	28.6852	42.5033	51.1187	28.8058	37.2957	7.25535	35.3719	5.75044	24.5822	52.7223	61.3001	26.7691	45.2258	41.3139	17.6567	32.6059	8.20437	22.1368	52.9108	30.8181	25.6165	11.9604	4.40717	11.4978	21.5124	25.2466	21.4197	38.6881	19.2948
ENSSSCG00000033843	ETFRF1	electron transfer flavoprotein regulatory factor 1	20.1584	-0.690304	0.241938	-2.85323	0.00432779	0.0804027	15.078	40.2866	29.6396	36.0974	16.5323	19.9924	14.1713	15.7813	25.9236	19.084	15.9362	15.6935	22.7194	9.87628	22.1011	12.6969	8.44101	17.2513	21.3046	10.5445	10.7724	8.23663	5.13929	17.8655	39.3879	39.4703	5.46958	13.8355	16.0336	20.5454	19.2123	34.1727	33.0538	15.8094	22.6447	12.6233	27.7197	11.0848	43.9492
ENSSSCG00000012399	FOXO4	forkhead box O4	190.108	-0.674327	0.14172	-4.75815	1.95378e-06	0.000492074	116.854	213.183	176.652	174.471	387.958	154.317	106.702	144.37	174.395	154.58	236.919	155.628	198.795	163.782	171.284	112.458	106.518	196.952	255.655	129.923	99.5164	158.555	132.594	237.834	226.82	272.86	169.557	273.943	214.316	189.018	157.147	126.439	237.987	113.54	191.347	223.18	390.595	110.631	356.953
ENSSSCG00000030241	TSC22D3	TSC22 domain family member 3	730.381	-0.669614	0.122611	-5.46127	4.72751e-08	3.26516e-05	753.899	1128.03	1001.82	490.924	758.281	929.649	716.068	1019.36	1177.56	601.145	571.58	814.102	648.64	648.543	813.598	341.002	789.837	629.673	722.717	795.354	679.174	650.008	304.246	717.968	715.774	966.163	533.284	633.666	881.313	484.872	1176.88	456.206	380.118	490.092	989.572	661.46	976.488	869.83	565.98
ENSSSCG00000010160	TARBP1	TAR (HIV-1) RNA binding protein 1	19.9928	-0.668362	0.239173	-2.79448	0.0051984	0.0881303	15.078	15.1075	41.4955	12.0325	22.0431	30.6134	21.257	19.8728	24.3525	1.9084	7.43691	25.175	24.9914	22.2216	17.9572	5.44151	29.7445	20.1265	16.3881	22.5953	36.6774	17.846	13.3622	21.2152	28.5223	29.1737	13.674	19.3697	27.2571	12.3273	16.7492	6.83454	25.3412	5.74888	23.7769	31.3057	22.6797	21.3002	10.7193
ENSSSCG00000016073	PGAP1	post-GPI attachment to proteins inositol deacylase 1	22.8051	-0.667529	0.224697	-2.97079	0.00297032	0.0662367	27.643	25.1791	24.8973	13.2357	14.328	28.7391	31.2602	34.4851	13.3546	5.72519	30.81	26.4828	24.9914	22.2216	20.7198	29.0214	29.7445	17.2513	39.3315	31.6334	34.882	16.4733	21.585	31.2646	24.4477	34.322	27.3479	8.30131	29.9294	14.3818	20.6902	5.12591	9.91613	7.18611	13.5868	21.2071	47.8794	16.9532	12.8632
ENSSSCG00000027157	SLC40A1	solute carrier family 40 member 1	544.014	-0.666351	0.154824	-4.30394	1.6779e-05	0.00249118	569.194	1069.27	979.293	555.899	520.216	238.66	218.822	244.318	432.845	402.672	485.524	379.26	620.241	517.682	843.987	353.698	234.74	639.736	1268.44	259.469	154.917	687.759	292.94	653.206	612.551	811.714	604.389	608.762	324.413	460.218	340.896	435.702	498.01	541.832	870.687	379.203	934.909	402.965	767.503
ENSSSCG00000017146	-	-	1182.96	-0.665446	0.182005	-3.65619	0.000255993	0.0147686	1952.6	1883.4	2227.71	1224.9	1311.56	313.631	390.544	383.427	213.673	345.42	1976.09	267.117	1231.39	2063.32	2165.91	1741.28	305.082	1418.92	1622.43	270.014	302.909	1766.76	529.347	2417.42	2359.2	1825.93	1411.15	708.378	272.036	1499.82	200.005	676.619	917.793	1365.36	1792.33	278.217	2139.45	205.395	2158.87
ENSSSCG00000010452	IFIT1	interferon-induced protein with tetratricopeptide repeats 1	1993.14	-0.662626	0.177117	-3.74119	0.000183153	0.0123274	2236.57	3518.36	3176.18	1254.98	2455.6	481.068	771.502	835.825	756.497	3692.75	3248.87	609.759	2847.88	2176.07	3335.89	2722.57	592.88	1316.85	2576.22	295.998	414.737	1706.36	598.214	2438.64	3179.56	2740.61	1810.43	2767.1	616.224	1662.13	467.008	3133.64	2743.46	1303.56	3288.01	601.878	4372.15	703.124	4283.44
ENSSSCG00000022692	RINL	Ras and Rab interactor like	100.005	-0.660096	0.157437	-4.19278	2.75561e-05	0.00339277	118.111	73.8588	110.259	70.9915	105.807	91.2155	94.6143	90.0119	63.6306	70.6107	157.237	79.4485	151.084	145.675	162.996	65.2982	89.2335	107.821	124.55	108.081	118.496	165.419	43.1701	132.874	153.477	92.6693	92.9829	44.2736	83.3746	49.309	77.342	52.9677	67.2093	70.4238	125.678	74.7298	112.139	100.198	162.934
ENSSSCG00000035264	UBQLN2	ubiquilin 2	18.6889	-0.659762	0.221389	-2.9801	0.00288154	0.0651213	20.104	28.5364	30.8252	21.6584	40.7797	24.3658	20.8402	18.1193	20.4246	11.4504	11.6866	22.2325	15.9036	13.9914	30.3891	7.25535	19.6957	17.2513	16.3881	19.5826	21.2883	28.8282	7.19501	22.3318	29.8805	25.7415	8.20437	8.30131	13.3613	14.3818	19.705	11.9604	7.71254	10.0605	24.9091	13.1282	21.4197	18.2573	10.7193
ENSSSCG00000006110	RBM12B	RNA binding motif protein 12B	22.8521	-0.656759	0.190794	-3.44225	0.000576902	0.0252139	13.8215	13.4289	21.3405	16.8454	23.1452	29.3639	38.7627	32.1471	22.7813	5.72519	15.9362	28.1176	42.031	27.9828	31.7704	12.6969	23.3133	12.9385	18.027	36.529	28.7264	11.6686	13.3622	26.7982	25.8059	24.0254	10.9392	16.6026	26.7226	18.4909	31.0353	15.3777	27.5448	21.5583	29.4381	22.7219	13.8598	34.1238	25.7264
ENSSSCG00000037572	EPSTI1	epithelial stromal interaction 1	210.128	-0.653883	0.21315	-3.06772	0.002157	0.0560425	356.845	357.544	450.522	113.105	297.581	8.74669	15.0049	18.7038	9.42676	242.366	313.413	15.0396	141.997	364.6	379.863	466.156	10.0488	175.388	293.348	10.1679	14.3632	212.093	59.6158	357.309	556.864	279.724	251.601	190.93	22.9815	221.891	4.92624	310.972	192.814	214.146	412.133	16.6627	430.915	16.0838	389.111
ENSSSCG00000011079	PIP4K2A	phosphatidylinositol-5-phosphate 4-kinase type 2 alpha	524.841	-0.65134	0.154209	-4.22375	2.40266e-05	0.0031099	733.795	924.914	1055.17	601.623	446.372	315.506	232.159	316.211	413.992	568.702	719.255	302.754	391.91	562.948	856.419	306.539	260.063	472.973	929.208	303.53	226.477	540.872	224.073	628.641	628.849	871.778	453.975	821.829	368.238	480.763	335.477	340.018	360.286	557.642	932.96	327.196	888.289	211.046	556.333
ENSSSCG00000025953	OGFOD1	2-oxoglutarate and iron dependent oxygenase domain containing 1	18.7304	-0.648664	0.223618	-2.90077	0.00372244	0.0735455	7.53899	21.8219	23.7117	7.21947	34.1667	26.2401	21.257	19.2883	9.42676	11.4504	10.6242	17.0013	11.3597	18.9295	27.6264	9.06919	23.7152	12.9385	26.221	28.2441	23.8532	12.3549	15.4179	20.0986	19.0149	15.4449	21.8783	13.8355	20.3092	14.3818	36.4542	15.3777	22.0358	11.4978	21.5124	24.7416	12.5998	17.1706	24.6544
ENSSSCG00000017328	ARHGAP27	Rho GTPase activating protein 27	120.003	-0.64737	0.152467	-4.24596	2.17655e-05	0.00292992	134.445	122.538	170.724	90.2434	109.113	98.7127	120.873	112.807	121.762	30.5343	196.547	132.414	143.132	149.79	208.579	90.6919	129.831	103.508	134.383	95.6534	114.906	182.579	78.1173	104.96	139.895	125.275	84.7785	85.7802	128.269	90.3999	109.363	105.935	72.7183	67.5494	169.835	107.55	125.998	99.1111	190.804
ENSSSCG00000022159	FNDC3A	fibronectin type III domain containing 3A	43.1763	-0.641442	0.172446	-3.71966	0.000199492	0.0128285	45.2339	77.216	61.6504	45.7233	33.0646	23.741	35.8451	29.2246	19.6391	19.084	65.8698	33.6757	31.8072	55.9656	77.354	52.6013	26.1269	44.5659	54.0809	33.5163	28.9829	55.5973	20.5572	53.5964	76.0595	51.4829	54.6958	35.9723	21.3781	36.9818	28.0796	35.8813	18.7305	31.6189	73.5952	36.3551	54.1794	28.038	76.1072
ENSSSCG00000037019	CAMK4	calcium/calmodulin dependent protein kinase IV	68.7381	-0.641012	0.196177	-3.26753	0.00108492	0.0375116	41.4644	43.6438	99.5891	25.2682	57.312	74.9717	107.535	98.1948	83.2697	28.6259	32.9349	93.1804	45.4389	93.0017	58.0155	70.7397	69.9398	20.1265	52.4421	119.755	111.571	63.8339	79.1451	167.489	82.8505	84.0888	38.2871	16.6026	68.41	51.3636	65.0264	61.5109	58.395	37.3678	65.6695	69.6805	91.9789	83.462	68.6037
ENSSSCG00000023842	TRAT1	T-cell receptor-associated transmembrane adapter 1	63.3057	-0.640934	0.20879	-3.06976	0.00214232	0.0560333	52.7729	23.5005	67.5783	44.5201	66.1292	161.814	86.695	110.469	102.123	24.8091	26.5604	116.067	47.7108	61.7268	35.9143	29.0214	84.0081	11.5009	57.3585	127.287	104.39	52.8517	39.0586	89.3273	89.6415	37.7542	41.0219	33.2052	88.7192	32.8727	107.392	47.8418	22.0358	8.62333	48.686	83.8186	60.4793	94.3294	49.3089
ENSSSCG00000016266	CAB39	calcium binding protein 39	217.77	-0.638876	0.187117	-3.41432	0.000639424	0.0265664	260.095	310.543	365.16	233.43	186.264	108.084	131.71	107.547	201.104	242.366	232.669	122.606	143.132	214.809	367.431	96.1334	147.517	184.014	386.76	173.984	129.782	253.276	108.953	171.955	331.402	398.135	284.418	268.409	145.371	129.436	141.876	134.982	120.095	240.016	546.869	166.627	338.936	116.282	250.832
ENSSSCG00000030801	-	guanylate-binding protein 6-like	519.669	-0.636207	0.214846	-2.96123	0.00306415	0.0670471	825.519	602.621	1104.97	302.015	732.932	73.7221	151.3	176.517	61.2739	454.198	795.749	126.202	351.015	963.761	942.061	622.146	91.2433	323.462	786.631	63.2668	65.9168	903.97	428.617	1218.2	1068.91	1178.96	757.537	387.394	72.1511	458.163	39.4099	772.303	364.693	398.11	746.142	137.341	1073.51	37.384	607.786
ENSSSCG00000009881	OAS2	2'-5'-oligoadenylate synthetase 2	668.664	-0.635113	0.221703	-2.8647	0.004174	0.0792118	1355.76	1208.6	1330.23	960.19	964.384	100.587	224.24	317.38	100.552	944.656	2020.71	85.3336	716.798	845.245	1422.76	955.893	136.262	1407.42	821.046	51.216	89.7699	735.806	125.399	1004.93	1464.15	935.273	691.902	442.736	99.4082	419.127	47.2919	469.875	385.627	455.599	782.373	75.2348	879.469	66.7261	937.941
ENSSSCG00000030108	ZNFX1	zinc finger NFX1-type containing 1	697.086	-0.632369	0.182267	-3.46947	0.000521485	0.0236177	1163.52	1035.7	1291.1	501.753	848.658	101.212	161.72	134.433	71.4863	400.763	1245.15	104.624	537.315	1139.06	1502.88	1003.05	125.007	612.422	768.604	84.7323	82.5884	1019.97	251.825	1191.4	1532.06	1093.15	921.625	650.269	101.012	653.345	64.5338	1108.9	603.782	830.714	1271.5	119.164	1355.74	95.1988	1406.38
ENSSSCG00000023785	TMEM156	transmembrane protein 156	58.658	-0.628468	0.190141	-3.30527	0.000948843	0.0344587	98.0068	112.467	81.8054	42.1136	98.0916	15.6191	23.7578	22.2107	24.3525	24.8091	52.0584	24.1942	49.9828	69.134	111.887	103.389	37.3816	54.6292	106.523	25.9846	20.7753	68.6386	20.5572	83.7444	131.746	77.2244	32.8175	52.5749	20.8437	53.4181	18.7197	78.5972	66.1075	50.3027	87.182	26.7614	98.2788	20.2134	100.762
ENSSSCG00000012643	SH2D1A	SH2 domain containing 1A	28.1504	-0.627043	0.212344	-2.95296	0.0031474	0.067582	30.1559	10.0717	17.7838	4.81298	22.0431	43.7335	44.1811	44.4214	40.8493	15.2672	7.43691	47.4075	40.895	19.7526	41.4396	16.3245	40.9992	15.8137	27.8598	46.3203	41.5507	17.1597	16.4457	42.4305	40.7462	20.5932	13.674	11.0684	40.084	18.4909	36.9468	27.3382	13.2215	11.4978	28.3058	40.3945	31.4996	49.5555	19.2948
ENSSSCG00000038953	UBE2B	ubiquitin conjugating enzyme E2 B	548.456	-0.625692	0.17053	-3.6691	0.00024341	0.0145967	366.897	673.122	567.895	422.339	874.007	513.556	251.749	419.081	494.905	664.122	923.239	290.003	603.201	279.828	516.614	355.512	281.367	412.594	637.499	221.81	185.952	231.312	324.803	338.327	675.028	645.253	689.167	689.008	467.646	589.654	346.807	504.047	1146.97	408.171	870.687	471.101	1184.39	253.863	1598.25
ENSSSCG00000016882	PARP8	poly(ADP-ribose) polymerase family member 8	54.3207	-0.625355	0.19687	-3.17649	0.00149068	0.0455189	59.0554	47.0011	66.3928	31.2844	25.3495	91.2155	78.359	67.8012	49.4905	28.6259	35.0597	73.2365	51.1187	46.0893	58.0155	45.3459	72.7535	15.8137	44.248	71.5517	75.1503	61.0884	27.7522	94.9103	61.1192	49.7668	49.2262	11.0684	54.5142	20.5454	59.6075	54.6763	35.2573	37.3678	81.5208	71.1953	97.0188	57.8148	61.1001
ENSSSCG00000016846	WDR70	WD repeat domain 70	14.219	-0.623508	0.228751	-2.72571	0.00641636	0.0972666	10.052	25.1791	15.4126	12.0325	16.5323	20.6172	15.4217	20.4572	22.7813	15.2672	12.749	17.0013	10.2237	9.87628	9.66925	9.06919	13.2644	11.5009	6.55526	15.4401	17.954	13.0413	9.25073	10.0493	20.3731	17.161	8.20437	8.30131	14.4302	4.10909	13.7935	11.9604	4.40717	12.935	19.248	18.6825	11.3399	18.04	32.158
ENSSSCG00000025503	ADGRG5	adhesion G protein-coupled receptor G5	36.3184	-0.621714	0.217418	-2.85954	0.00424258	0.079875	6.28249	31.8936	27.2685	15.6422	22.0431	88.7165	55.8516	64.2942	54.9894	13.3588	18.0611	53.2926	45.4389	38.6821	29.0077	3.62768	87.2238	7.18805	31.1375	94.9002	86.1792	34.3193	34.9472	12.2825	39.3879	27.4576	27.3479	5.5342	68.9444	24.6545	53.2034	10.2518	15.4251	15.8094	20.3802	50.9981	21.4197	53.2505	25.7264
ENSSSCG00000008498	HEATR5B	HEAT repeat containing 5B	33.2054	-0.618675	0.174647	-3.54244	0.000396447	0.0199131	41.4644	18.4647	55.7225	20.4552	26.4517	45.6078	43.7643	57.2803	41.6349	13.3588	32.9349	35.6374	39.759	33.744	42.8209	14.5107	41.8031	20.1265	40.9704	35.7759	49.2452	21.278	31.8636	46.8968	28.5223	37.7542	19.1435	19.3697	28.326	22.6	43.8435	30.7554	20.934	15.8094	29.4381	49.4833	34.0196	30.2115	33.2299
ENSSSCG00000022815	PYGB	glycogen phosphorylase B	96.8045	-0.618582	0.18643	-3.31804	0.000906515	0.0336072	75.3899	141.003	103.146	114.308	168.629	87.4669	75.0245	87.6739	108.408	62.9771	94.555	130.779	69.2943	67.4879	187.86	87.0642	95.2628	83.3813	108.162	83.9792	103.364	99.526	48.3094	112.776	129.029	84.0888	71.1046	130.054	78.5646	98.6181	108.87	41.0072	44.0717	64.675	103.033	62.6115	225.537	63.2485	75.0353
ENSSSCG00000039408	ADCY7	adenylate cyclase 7	134.854	-0.616632	0.140072	-4.40224	1.07138e-05	0.00183333	75.3899	105.752	99.5891	77.0077	105.807	278.02	226.741	214.509	206.603	36.2595	111.554	248.154	169.26	119.338	124.319	54.4151	228.711	70.4429	90.1348	313.698	297.267	120.118	106.897	108.309	115.447	96.1015	84.7785	58.1091	210.04	63.6908	229.07	23.9209	35.2573	73.2983	91.7109	146.935	120.959	243.431	78.2511
ENSSSCG00000016692	TAX1BP1	Tax1 binding protein 1	1071.16	-0.613314	0.154355	-3.97339	7.08575e-05	0.00641208	730.025	1445.28	1203.37	997.49	1701.72	572.908	399.297	810.691	958.387	1314.88	1353.52	633.626	1206.4	748.952	1371.65	917.802	430.492	753.307	1438.88	475.254	353.181	464.683	503.651	915.605	1465.5	1467.26	1337.31	1436.13	856.193	1349.83	631.544	1129.41	1882.96	980.185	1656.46	775.575	2175.99	440.783	2489.03
ENSSSCG00000037536	SLC25A28	solute carrier family 25 member 28	59.097	-0.612931	0.20044	-3.05793	0.00222873	0.0569653	120.624	80.5732	106.703	37.3006	105.807	38.7354	26.2586	42.0835	40.0637	68.7023	161.487	31.714	32.9432	92.1787	110.506	41.7183	27.7347	51.7539	31.1375	24.1016	21.8013	74.1297	21.585	59.1793	67.9103	49.7668	82.0437	27.671	40.6184	36.9818	22.6607	46.1331	56.1914	68.9866	92.8431	35.3452	84.419	39.3401	105.049
ENSSSCG00000006625	RFX5	regulatory factor X5	57.5709	-0.611225	0.156967	-3.89396	9.86204e-05	0.00809198	84.1854	57.0727	98.4036	36.0974	62.8227	56.8535	67.1053	46.1749	34.5648	47.7099	65.8698	56.2352	57.9346	75.7182	88.4045	56.229	47.8324	18.6889	60.6361	39.9183	50.5277	48.7334	63.7273	75.9282	73.3431	75.5083	73.8394	41.5065	51.3075	47.2545	34.4837	34.1727	41.8681	40.2422	79.2563	41.9093	107.099	29.9941	76.1072
ENSSSCG00000003973	CTPS1	CTP synthase 1	26.8426	-0.610989	0.177857	-3.43528	0.000591931	0.0256487	16.3345	30.215	29.6396	14.4389	19.8388	29.9887	41.2635	30.9781	22.7813	13.3588	26.5604	44.1381	39.759	20.5756	24.8638	16.3245	27.7347	17.2513	29.4987	44.0608	30.7783	18.5324	22.6129	33.4977	31.2387	32.6059	35.5523	35.9723	36.3428	12.3273	30.0501	22.2123	12.1197	11.4978	28.3058	22.217	31.4996	37.384	22.5106
ENSSSCG00000038422	TMX1	thioredoxin related transmembrane protein 1	338.741	-0.608512	0.17758	-3.4267	0.000610957	0.0261327	163.345	441.474	464.749	212.974	414.41	164.313	210.069	337.252	238.026	364.504	457.901	272.021	322.616	264.191	426.828	371.837	184.496	215.641	329.402	146.116	183.131	188.07	168.569	242.3	435.984	398.135	366.462	448.271	216.988	332.836	245.819	334.892	707.35	319.063	425.72	266.604	570.773	176.487	1181.27
ENSSSCG00000040673	TMEM140	transmembrane protein 140	264.83	-0.606072	0.202422	-2.9941	0.00275254	0.0638842	434.748	530.441	692.382	263.511	199.49	137.448	90.0295	143.201	135.117	265.267	355.909	105.931	197.659	364.6	363.287	174.128	106.116	267.395	586.695	67.0327	38.4728	262.886	56.5322	321.578	283.865	260.847	309.031	572.79	115.442	197.236	86.2092	348.562	241.292	229.955	501.579	129.262	496.434	66.9434	329.083
ENSSSCG00000015882	BAZ2B	bromodomain adjacent to zinc finger domain 2B	30.1932	-0.606056	0.210053	-2.88525	0.00391098	0.0757519	28.8995	58.7513	46.2378	16.8454	23.1452	46.8573	30.8434	37.992	29.0658	7.63358	46.7463	31.3871	19.3115	26.3368	34.533	32.6491	29.7445	20.1265	39.3315	40.6715	34.882	54.2245	20.5572	33.4977	38.0297	41.1863	27.3479	13.8355	21.3781	14.3818	34.9763	13.6691	8.81433	21.5583	23.7769	30.8008	23.9397	33.9064	39.6615
ENSSSCG00000030318	SDHC	succinate dehydrogenase complex subunit C	41.6619	-0.604135	0.174354	-3.465	0.000530232	0.0237218	27.643	68.823	69.9495	45.7233	100.296	28.7391	24.1746	31.5626	30.637	49.6183	65.8698	33.0218	36.3511	26.3368	37.2957	34.4629	26.5289	27.3146	63.9138	22.5953	26.6745	14.4141	16.4457	43.5471	55.6864	37.7542	35.5523	41.5065	38.4806	45.1999	32.5132	71.7627	59.4968	44.5539	50.9505	35.8501	61.7393	22.1696	39.6615
ENSSSCG00000025272	HEMK1	HemK methyltransferase family member 1	21.6313	-0.602853	0.216697	-2.78202	0.00540225	0.0892987	12.565	8.39305	23.7117	10.8292	40.7797	21.242	26.2586	26.8867	32.9937	11.4504	21.2483	24.1942	26.1274	33.744	9.66925	29.0214	29.7445	12.9385	32.7763	25.608	23.0837	19.2188	10.2786	21.2152	39.3879	10.2966	16.4087	16.6026	26.1882	16.4363	18.2271	17.0864	23.1376	8.62333	24.9091	20.7022	18.8998	31.2982	21.4386
ENSSSCG00000011874	PARP14	poly(ADP-ribose) polymerase family member 14	408.858	-0.602633	0.16664	-3.61638	0.000298753	0.0161295	624.479	564.013	681.711	405.494	532.34	88.7165	127.959	122.159	69.1296	288.168	589.641	93.8343	565.714	695.455	932.392	533.268	93.655	557.792	496.561	62.5136	64.8908	807.876	203.516	629.758	838.013	612.647	544.223	221.368	88.1847	361.6	50.7403	403.238	262.226	390.924	630.654	109.065	709.372	54.9893	837.179
ENSSSCG00000022496	STK39	serine/threonine kinase 39	23.8615	-0.597417	0.217558	-2.74602	0.00603237	0.094504	16.3345	11.7503	18.9694	4.81298	16.5323	38.7354	40.4299	50.8509	35.3503	0	16.9986	37.5991	21.5835	11.5223	24.8638	5.44151	34.9699	17.2513	18.027	38.412	48.2193	16.4733	23.6408	26.7982	27.1641	27.4576	16.4087	33.2052	39.0151	8.21817	35.9616	13.6691	14.3233	2.87444	27.1736	35.8501	15.1198	36.0799	22.5106
ENSSSCG00000000449	DTX3	deltex E3 ubiquitin ligase 3	81.7924	-0.596226	0.1918	-3.10858	0.00187986	0.0522838	65.3379	102.395	147.013	44.5201	108.011	89.966	77.1086	73.6461	62.8451	61.0687	53.1208	78.4677	105.645	83.1254	98.0738	96.1334	59.891	17.2513	93.4124	57.618	74.1243	63.1475	54.4765	127.291	141.253	102.966	87.5133	66.4105	72.6856	71.909	68.4747	146.943	53.9878	71.8611	58.8761	70.1855	166.318	62.1618	54.6685
ENSSSCG00000030326	TCP11L1	t-complex 11 like 1	29.8457	-0.594987	0.184185	-3.23038	0.00123626	0.0408602	28.8995	63.7872	39.1243	16.8454	40.7797	29.3639	22.0906	22.2107	18.068	11.4504	30.81	24.8481	37.4871	23.0447	41.4396	32.6491	30.1465	10.0633	65.5526	22.5953	18.7234	35.6921	26.7243	32.3812	40.7462	39.4703	16.4087	24.9039	24.5848	30.8181	23.646	18.795	47.377	27.3072	31.7025	25.2466	37.7995	17.1706	33.2299
ENSSSCG00000006682	-	RNA polymerase III subunit G like	17.2832	-0.59242	0.214314	-2.76426	0.00570518	0.0915732	10.052	16.7861	23.7117	13.2357	16.5323	21.242	17.5057	15.1968	11.7834	24.8091	19.1235	16.6744	15.9036	13.1684	19.3385	5.44151	19.2937	20.1265	13.1105	15.4401	17.954	12.3549	13.3622	26.7982	44.8208	24.0254	16.4087	8.30131	14.4302	14.3818	23.646	10.2518	11.0179	15.8094	13.5868	18.6825	26.4597	19.344	13.9351
ENSSSCG00000030486	TBC1D23	TBC1 domain family member 23	31.8969	-0.588736	0.20338	-2.89476	0.00379445	0.0747397	27.643	25.1791	35.5676	24.0649	28.656	43.1087	22.9242	30.9781	31.4225	13.3588	50.9959	32.041	29.5353	49.3814	38.677	25.3937	29.3426	21.5641	26.221	37.2822	30.7783	41.8696	32.8915	17.8655	31.2387	66.9278	32.8175	5.5342	33.1361	12.3273	27.5869	18.795	33.0538	33.0561	49.8183	24.2367	28.9797	34.3411	65.3879
ENSSSCG00000025425	FCSK	fucose kinase	68.495	-0.587684	0.127069	-4.62493	3.74728e-06	0.000788177	35.1819	40.2866	56.9081	37.3006	59.5163	111.833	124.624	106.378	102.909	20.9924	56.308	108.22	70.4303	49.3814	44.2023	36.2768	125.409	34.5026	55.7197	112.223	123.37	43.9287	58.588	100.493	62.4774	75.5083	60.1654	30.4381	102.615	32.8727	120.2	46.1331	30.8502	31.6189	57.7439	108.56	42.8395	89.9824	64.3159
ENSSSCG00000002276	PLEKHG3	pleckstrin homology and RhoGEF domain containing G3	39.7487	-0.586516	0.207268	-2.82974	0.00465858	0.0832689	21.3605	15.1075	42.6811	20.4552	33.0646	83.7184	53.7676	91.1809	109.193	41.9847	40.3718	54.9274	29.5353	25.5137	37.2957	19.9522	68.7339	27.3146	21.3046	53.0989	45.9109	32.9465	11.3064	21.2152	32.5969	17.161	13.674	24.9039	65.2032	18.4909	103.451	5.12591	17.6287	15.8094	40.7604	46.9586	27.7197	79.115	39.6615
ENSSSCG00000008437	SOCS5	suppressor of cytokine signaling 5	69.1815	-0.584799	0.170675	-3.42639	0.000611652	0.0261327	77.9029	122.538	91.29	70.9915	116.828	73.0974	43.7643	63.7097	29.0658	99.2366	96.6798	40.8686	57.9346	84.7714	64.9221	47.1598	34.9699	35.9402	81.9407	39.9183	37.4469	24.0235	47.2815	44.6637	88.2833	68.6439	24.6131	88.5473	45.4285	117.109	41.873	61.5109	127.808	63.2377	112.091	55.5424	122.219	37.384	116.841
ENSSSCG00000011833	DLG1	discs large MAGUK scaffold protein 1	54.5803	-0.582597	0.155212	-3.75355	0.00017435	0.0119744	66.5944	85.6091	73.5063	49.3331	34.1667	50.6059	56.6852	58.4493	64.4162	30.5343	84.9932	43.1572	32.9432	66.6649	75.9726	58.0428	46.2246	33.065	99.9677	53.4755	42.8331	51.479	53.4487	75.9282	84.2087	54.9151	38.2871	47.0407	44.894	34.9272	39.4099	47.8418	23.1376	44.5539	71.3307	47.4635	75.5991	38.6881	48.2369
ENSSSCG00000013747	RAD23A	RAD23 homolog A, nucleotide excision repair protein	1775.71	-0.580252	0.16328	-3.55373	0.000379806	0.0192689	1759.1	3078.57	2199.26	1975.73	3741.81	1327.62	753.58	1556.5	1922.27	2173.66	3159.62	1241.75	1836.87	1012.32	1493.21	1082.86	664.428	1568.43	2676.18	653.757	325.993	715.214	956.937	1392.39	1912.35	1983.81	1826.84	2581.71	1271.46	1814.16	591.642	1747.93	3382.5	1616.87	2493.18	1548.12	3000.02	589.885	3624.2
ENSSSCG00000040257	ZNF862	zinc finger protein 862	28.4006	-0.577356	0.18904	-3.05415	0.00225697	0.0573965	17.591	20.1433	27.2685	20.4552	19.8388	46.2325	44.5979	33.9006	30.637	28.6259	18.0611	32.6949	40.895	26.3368	33.1517	16.3245	43.4109	11.5009	22.9434	43.3076	46.9369	32.2601	13.3622	41.3139	16.2985	34.322	19.1435	5.5342	43.2907	8.21817	42.3657	15.3777	18.7305	25.87	44.1571	27.7712	35.2796	38.036	21.4386
ENSSSCG00000015599	PPP2R5A	protein phosphatase 2 regulatory subunit B'alpha	253.991	-0.576663	0.161566	-3.5692	0.000358071	0.0184443	425.953	394.473	395.985	218.991	306.399	163.063	164.637	175.932	212.102	171.756	361.221	186.361	252.186	395.874	436.497	137.852	172.036	334.963	347.429	210.136	153.635	370.648	128.482	185.354	255.343	255.699	218.783	268.409	203.627	162.309	200.005	158.903	135.52	271.635	489.125	151.479	354.056	161.49	317.292
ENSSSCG00000003755	MCOLN2	mucolipin 2	280.662	-0.575968	0.178526	-3.22624	0.00125429	0.0412487	245.017	399.509	333.149	299.608	500.378	148.069	109.202	229.121	238.811	265.267	313.413	199.766	314.664	377.768	454.455	228.544	90.8413	227.142	172.075	175.49	113.88	124.236	131.566	351.726	169.776	511.397	188.701	556.188	174.232	297.909	124.634	415.198	441.819	333.435	417.794	247.416	408.235	101.937	513.456
ENSSSCG00000037360	CST3	cystatin C	85.4097	-0.575562	0.210758	-2.73092	0.00631581	0.0966348	51.5164	52.0369	74.6919	58.959	54.0055	117.456	90.8631	97.6103	241.168	78.2442	97.7422	108.22	105.645	90.5326	102.218	34.4629	161.183	64.6924	103.245	108.457	85.6662	77.5616	41.1144	16.7489	74.7013	41.1863	35.5523	77.4789	149.112	55.4727	144.339	42.7159	34.1555	50.3027	87.182	113.61	51.6594	114.76	144.711
ENSSSCG00000004438	TSPYL1	TSPY like 1	40.5958	-0.57047	0.172262	-3.31165	0.00092748	0.033927	30.1559	53.7155	47.4234	40.9103	49.5969	27.4896	25.425	29.8091	29.0658	19.084	38.247	30.4062	23.8554	35.39	41.4396	41.7183	24.1172	27.3146	57.3585	18.8294	18.2105	18.5324	25.6965	33.4977	62.4774	29.1737	49.2262	55.342	40.6184	78.0726	35.4689	42.7159	49.5806	33.0561	50.9505	38.3748	88.1989	24.7778	117.913
ENSSSCG00000000840	WASHC4	WASH complex subunit 4	90.693	-0.570396	0.180747	-3.15577	0.00160074	0.0475327	98.0068	129.253	105.517	108.292	96.9895	74.3469	70.8565	71.8926	56.5606	11.4504	164.674	60.1585	127.229	108.639	128.463	119.713	69.5378	70.4429	75.3855	88.4982	61.5565	159.242	53.4487	83.7444	124.955	132.14	68.3698	66.4105	80.7024	59.5817	70.4452	51.2591	74.9218	77.6099	116.62	74.2249	108.359	77.8109	159.718
ENSSSCG00000012853	IRF7	interferon regulatory factor 7	590.274	-0.569939	0.182701	-3.11951	0.00181151	0.0512297	1140.9	872.877	1191.51	610.045	844.249	114.332	109.619	149.63	98.1954	895.038	1025.23	96.4498	703.167	997.505	1306.73	732.79	74.7632	868.316	685.024	51.216	39.2423	959.568	150.067	704.569	1068.91	724.193	464.914	542.352	123.459	558.836	72.9084	717.627	412.07	636.689	1071.09	66.6509	884.509	94.5467	1160.9
ENSSSCG00000008540	PPP1CB	protein phosphatase 1 catalytic subunit beta	526.935	-0.566975	0.121163	-4.67946	2.87638e-06	0.000670897	272.66	574.084	556.039	329.689	560.996	391.727	453.482	462.918	381.784	461.832	441.965	397.57	653.184	392.582	562.198	448.018	395.12	421.22	648.97	332.151	351.385	424.187	308.358	695.636	677.744	1010.78	653.615	586.626	448.94	495.145	534.99	481.835	675.398	523.149	665.753	543.811	734.571	436.219	1164.12
ENSSSCG00000022559	USP14	ubiquitin specific peptidase 14	147.295	-0.563153	0.159427	-3.53237	0.000411859	0.0201831	109.315	139.325	197.993	103.479	193.979	83.0936	65.8549	145.539	123.333	166.03	239.043	94.4882	149.948	143.206	236.206	128.782	84.4101	119.322	240.906	102.809	75.1503	91.2893	106.897	131.758	177.925	235.105	164.087	132.821	87.1158	226	77.8346	131.565	261.125	99.1683	158.513	93.4123	214.197	74.768	338.731
ENSSSCG00000001984	KHNYN	KH and NYN domain containing	142.756	-0.562389	0.159377	-3.52868	0.000417641	0.0201831	255.069	156.111	206.292	128.747	166.425	95.5889	100.033	95.2723	77.7708	72.519	185.923	79.7755	223.787	170.366	234.825	121.527	92.4492	143.761	155.687	88.4982	77.2022	238.176	86.3402	232.251	211.88	168.178	199.64	69.1776	94.0637	113	92.1207	93.9749	107.976	93.4194	184.554	68.1657	187.738	95.8508	303.357
ENSSSCG00000021822	RNF169	ring finger protein 169	32.2916	-0.561014	0.188955	-2.96904	0.00298732	0.0662856	16.3345	16.7861	33.1964	31.2844	28.656	58.7278	56.2684	63.1252	40.0637	3.81679	19.1235	49.0423	23.8554	25.5137	27.6264	19.9522	48.2343	15.8137	49.1644	45.1906	44.6285	26.0827	24.6686	44.6637	31.2387	15.4449	27.3479	19.3697	44.894	20.5454	37.9321	10.2518	25.3412	11.4978	28.3058	46.9586	36.5396	56.5107	35.3738
ENSSSCG00000004983	-	MIA SH3 domain ER export factor 2	18.3404	-0.560921	0.200212	-2.80164	0.00508435	0.0870026	13.8215	16.7861	21.3405	14.4389	19.8388	24.9906	22.5074	26.8867	21.2102	7.63358	20.1859	22.2325	20.4475	25.5137	20.7198	18.1384	18.0879	14.3761	9.83289	20.7123	19.7494	19.2188	14.39	30.148	20.3731	17.161	8.20437	11.0684	29.9294	4.10909	24.6312	22.2123	12.1197	7.18611	11.3223	16.6627	17.6398	25.8645	23.5825
ENSSSCG00000033089	-	interferon-induced very large GTPase 1-like	273.521	-0.56014	0.187724	-2.98384	0.00284652	0.0650192	380.719	391.116	608.205	220.194	403.388	54.3545	99.1991	127.419	41.6349	190.84	332.536	72.2556	251.05	437.026	512.47	297.469	67.93	163.887	467.062	47.0735	53.6055	371.335	288.828	626.408	494.387	459.914	404.749	240.738	90.3225	357.49	27.5869	382.734	214.849	228.518	326.083	115.629	500.214	44.7739	273.343
ENSSSCG00000029901	UBE2O	ubiquitin conjugating enzyme E2 O	14509.5	-0.558166	0.190045	-2.93702	0.00331383	0.0691249	8756.53	19166.4	21014.5	13144.3	23496.8	6599.38	5220.87	7693.09	8813.23	15433.2	18081.2	7685.25	10370.3	8841.74	20610.7	14367.4	7700.21	11084	20542.5	6715.7	3422.54	5836.34	5457.93	12295.9	13155.6	23644.4	19611.2	25011.8	14977.5	16006.9	8797.28	21272.5	25043.7	13446.6	20397.2	13435.2	35099.4	3296.53	30325
ENSSSCG00000000657	-	C-type lectin domain family 2 member D	277.502	-0.558109	0.194529	-2.86903	0.00411737	0.078432	241.248	198.076	295.211	244.259	231.452	396.1	332.609	384.596	483.121	150.763	362.284	293.6	475.972	284.766	366.05	139.666	317.945	297.585	122.911	307.673	289.829	380.944	140.817	180.888	282.507	156.165	229.722	121.752	363.962	121.218	422.671	133.274	174.083	119.289	378.166	320.126	183.958	480.341	416.982
ENSSSCG00000026689	-	coiled-coil domain containing 114	47.6676	-0.557553	0.194907	-2.86062	0.00422816	0.0797897	23.8735	36.9294	29.6396	10.8292	36.3711	49.3563	107.952	65.4632	62.8451	5.72519	19.1235	102.008	44.3029	27.9828	69.066	34.4629	92.8511	17.2513	50.8032	47.0735	107.467	45.3015	38.0308	42.4305	50.2536	46.3346	49.2262	19.3697	82.3057	30.8181	97.5396	15.3777	24.2394	15.8094	32.8348	68.6707	37.7995	92.3733	28.9422
ENSSSCG00000006140	CA2	carbonic anhydrase 2	333.129	-0.555946	0.172049	-3.23133	0.00123215	0.0408602	236.222	428.045	227.632	190.113	309.705	150.568	152.967	156.644	265.52	469.465	495.086	182.11	280.585	284.766	542.859	382.72	213.035	186.889	778.437	157.037	163.125	173.656	305.274	366.242	472.655	622.944	462.18	354.189	260.813	435.563	170.941	396.403	391.136	199.774	516.298	236.813	475.014	213.654	684.965
ENSSSCG00000011733	IFT80	intraflagellar transport 80	20.4858	-0.554299	0.20433	-2.71276	0.00667261	0.0990743	8.79549	6.71444	22.5261	3.60974	16.5323	28.1144	27.9258	35.0696	29.8514	3.81679	12.749	27.4637	18.1756	20.5756	17.9572	14.5107	25.323	10.0633	26.221	41.8013	35.395	16.4733	13.3622	26.7982	25.8059	29.1737	24.6131	2.7671	21.3781	24.6545	24.6312	18.795	12.1197	15.8094	16.9835	22.7219	22.6797	34.1238	12.8632
ENSSSCG00000033377	FOPNL	FGFR1OP N-terminal like	21.0801	-0.55369	0.198374	-2.79113	0.00525238	0.0883442	20.104	35.2508	28.454	25.2682	22.0431	16.2439	20.0065	22.7952	25.9236	15.2672	26.5604	23.8672	28.3993	15.6375	24.8638	12.6969	14.4703	18.6889	24.5822	18.8294	13.8502	19.2188	12.3343	26.7982	12.2238	36.0381	27.3479	19.3697	21.3781	34.9272	13.3008	11.9604	16.5269	4.31166	37.3637	10.6036	26.4597	15.6491	22.5106
ENSSSCG00000036383	LGALS3BP	galectin 3 binding protein	117.113	-0.551985	0.170639	-3.23481	0.00121723	0.0408277	183.449	177.933	228.818	70.9915	217.124	28.7391	40.4299	41.499	40.0637	127.863	200.797	41.8494	145.404	193.411	216.867	137.852	29.3426	73.3181	155.687	22.5953	23.8532	153.064	56.5322	168.605	225.462	166.461	172.292	107.917	25.1193	123.273	18.2271	182.824	126.706	96.2938	121.149	27.7712	226.797	11.3021	159.718
ENSSSCG00000016743	OGDH	oxoglutarate dehydrogenase	472.705	-0.548132	0.150293	-3.64708	0.000265239	0.0151291	310.355	632.836	746.919	392.258	535.646	323.628	295.513	387.519	444.629	520.992	803.186	529.984	569.122	333.325	509.707	382.72	252.426	518.977	703.051	227.836	181.592	322.601	290.884	572.811	358.566	580.041	412.953	794.158	533.918	262.981	348.285	466.457	711.758	320.5	578.571	622.075	691.732	301.463	663.526
ENSSSCG00000034733	CMAS	cytidine monophosphate N-acetylneuraminic acid synthetase	815.066	-0.54454	0.181131	-3.00632	0.00264426	0.0622816	459.878	961.843	860.735	725.557	1654.33	348.618	269.672	668.075	620.595	1520.99	1258.96	364.548	808.812	483.938	773.54	783.578	269.308	442.784	1043.92	300.141	280.852	308.187	755.476	672.188	996.923	1009.07	757.537	1117.91	466.043	873.181	381.291	912.411	1511.66	757.416	1278.29	449.389	1496.86	610.098	2532.98
ENSSSCG00000000687	CD4	CD4 molecule	42.3187	-0.541014	0.181637	-2.97854	0.00289621	0.0652683	33.9254	28.5364	35.5676	33.6909	28.656	68.724	65.4381	88.8429	60.4884	15.2672	23.3731	102.662	37.4871	40.3282	44.2023	16.3245	56.6754	7.18805	49.1644	100.549	79.5105	26.0827	39.0586	24.565	50.2536	29.1737	10.9392	27.671	66.8066	26.7091	49.755	13.6691	28.6466	15.8094	44.1571	56.5523	28.9797	64.9873	30.0141
ENSSSCG00000014557	RIC8A	RIC8 guanine nucleotide exchange factor A	29.712	-0.54068	0.193925	-2.7881	0.00530188	0.0884151	18.8475	11.7503	24.8973	10.8292	44.0861	27.4896	46.2651	49.6819	26.7092	24.8091	35.0597	41.8494	48.8468	34.567	26.2451	25.3937	55.8714	11.5009	22.9434	44.4374	63.3519	19.2188	30.8358	20.0986	42.1044	27.4576	10.9392	13.8355	37.9462	10.2727	44.3362	29.0468	20.934	17.2467	28.3058	30.2959	15.1198	43.9045	21.4386
ENSSSCG00000033768	LAX1	lymphocyte transmembrane adaptor 1	35.1315	-0.539218	0.174541	-3.08936	0.00200591	0.0539913	31.4124	41.9652	36.7531	25.2682	17.6345	71.8478	42.9307	54.3578	43.206	11.4504	22.3107	44.792	47.7108	37.0361	44.2023	32.6491	68.332	15.8137	52.4421	58.7478	51.0406	28.8282	25.6965	36.8475	38.0297	25.7415	19.1435	11.0684	50.773	18.4909	50.7403	22.2123	19.8323	18.6839	18.1157	35.8501	32.7596	33.2544	32.158
ENSSSCG00000011465	PDE12	phosphodiesterase 12	24.811	-0.537728	0.183321	-2.93326	0.00335419	0.0695706	32.6689	38.608	36.7531	16.8454	30.8603	19.3677	13.3377	20.4572	11.7834	22.9008	16.9986	15.0396	27.2633	31.2749	45.5836	32.6491	9.64687	20.1265	29.4987	13.1806	11.2854	23.3371	16.4457	43.5471	46.179	58.3473	24.6131	24.9039	8.55125	18.4909	10.8377	34.1727	16.5269	27.3072	22.6447	12.1184	37.7995	16.7359	28.9422
ENSSSCG00000010493	PDLIM1	PDZ and LIM domain 1	570.181	-0.537156	0.194599	-2.76032	0.00577454	0.092256	811.698	1128.03	1056.36	770.077	583.039	168.686	160.886	236.135	300.871	627.862	722.443	207.285	500.964	697.924	1018.03	515.13	143.899	665.613	1091.45	252.691	120.035	492.139	164.457	924.538	802.699	1048.54	500.467	1007.23	285.932	922.49	213.799	398.112	418.681	718.611	1082.42	139.866	762.291	98.6764	477.01
ENSSSCG00000030253	NOL9	nucleolar protein 9	94.6068	-0.5313	0.159894	-3.32282	0.00089112	0.0332431	30.1559	43.6438	80.6198	67.3817	101.398	128.077	158.385	143.785	93.482	51.5267	57.3704	125.221	74.9742	102.878	103.599	88.8781	120.184	38.8155	96.69	124.651	137.22	70.0114	96.6187	168.605	137.179	142.436	57.4306	22.1368	118.114	90.3999	113.304	102.518	61.7003	58.9261	95.1076	113.105	95.7589	100.198	77.1791
ENSSSCG00000013111	CD6	CD6 molecule	55.4279	-0.529877	0.166967	-3.17355	0.00150588	0.0455189	45.2339	58.7513	47.4234	21.6584	48.4947	106.21	87.1118	93.5188	91.9109	32.4427	28.6852	83.3719	43.1669	50.2044	34.533	32.6491	100.488	15.8137	37.6927	83.9792	101.568	35.0057	26.7243	69.2287	65.1938	27.4576	30.0827	44.2736	82.3057	41.0909	85.224	44.4245	44.0717	12.935	57.7439	81.7989	60.4793	81.9405	26.7983
ENSSSCG00000029615	VAMP7	vesicle associated membrane protein 7	56.1918	-0.52895	0.192712	-2.74477	0.00605529	0.094504	51.5164	147.718	101.96	56.5525	24.2474	36.2363	22.9242	35.0696	36.9215	41.9847	58.4329	31.0601	47.7108	65.0189	55.2528	47.1598	35.7738	84.819	95.0512	28.6207	30.7783	63.8339	28.7801	84.8609	104.582	104.682	65.635	44.2736	43.8251	61.6363	37.4394	41.0072	62.8021	57.4888	83.7853	20.1973	70.5592	18.04	63.244
ENSSSCG00000027372	SAMD9	sterile alpha motif domain-containing protein 9	1022.4	-0.527966	0.192494	-2.74277	0.00609232	0.0947736	1873.44	1505.71	1860.18	1427.05	1288.42	308.009	357.2	365.892	159.469	589.694	1921.91	228.864	1610.81	1748.1	2001.53	1157.23	254.034	1690.63	1040.65	169.841	179.54	2294.59	484.122	1243.88	1583.67	1178.96	1124	644.735	208.437	867.017	198.527	606.565	754.727	990.245	1514.93	309.523	1427.56	266.47	2437.57
ENSSSCG00000011876	DTX3L	deltex E3 ubiquitin ligase 3L	123.69	-0.527542	0.141804	-3.72021	0.000199056	0.0128285	250.043	164.504	196.807	145.593	168.629	40.6097	42.5139	30.3936	27.4947	101.145	249.668	30.0793	198.795	218.101	248.638	121.527	39.7933	172.513	137.66	18.4528	23.0837	191.502	76.0616	139.574	205.089	190.487	134.005	83.0131	29.3949	143.818	25.1238	134.982	88.1433	102.043	165.306	35.8501	205.378	20.8655	227.25
ENSSSCG00000006628	PSMD4	proteasome 26S subunit, non-ATPase 4	218.516	-0.526755	0.182474	-2.88674	0.00389251	0.0757519	175.91	276.971	269.128	249.072	319.624	95.5889	82.527	120.406	135.117	349.236	380.345	105.931	230.602	198.349	215.486	282.959	67.5281	87.6942	319.569	80.2133	61.0436	54.9109	129.51	227.785	362.641	398.135	185.966	379.093	151.785	254.763	104.929	293.885	362.49	264.449	298.91	124.718	396.895	66.7261	361.241
ENSSSCG00000035430	YPEL3	yippee like 3	1166.45	-0.525587	0.136829	-3.8412	0.000122434	0.00902255	1046.66	1797.79	1304.14	1005.91	1703.93	991.5	516.836	962.66	1376.31	1427.48	1830.54	831.103	1314.32	942.362	1266.67	765.44	623.831	928.696	1491.32	696.688	506.815	630.789	563.267	893.273	969.758	1453.53	1009.14	2144.5	1134.64	1058.09	873.915	1177.25	2148.49	948.566	1285.08	1015.92	2121.81	666.826	2065.61
ENSSSCG00000030548	HERC5	HECT and RLD domain containing E3 ubiquitin protein ligase 5	402.058	-0.519093	0.176646	-2.9386	0.00329699	0.0690589	693.587	641.229	703.052	423.542	577.528	57.4783	138.379	90.0119	73.0574	349.236	698.007	51.9848	674.767	585.993	776.302	647.54	83.6062	511.789	417.898	30.5036	40.5247	606.765	122.315	569.462	771.461	504.533	437.567	409.531	65.2032	371.872	34.4837	457.914	355.879	462.785	732.555	80.2841	598.493	66.7261	766.432
ENSSSCG00000028679	PLEKHB2	pleckstrin homology domain containing B2	260.999	-0.516074	0.118992	-4.33704	1.44414e-05	0.00224309	288.995	501.904	490.832	268.324	335.055	116.831	107.118	141.447	172.038	223.282	314.475	167.725	264.682	302.873	385.389	232.171	103.302	309.086	404.787	145.363	106.698	279.359	161.374	259.049	335.477	355.232	248.866	406.764	150.716	316.4	184.734	164.029	273.244	277.384	413.265	114.619	422.095	99.5458	334.443
ENSSSCG00000014780	TRIM21	tripartite motif containing 21	80.6853	-0.513619	0.154273	-3.32928	0.000870703	0.0330474	129.419	149.396	150.569	77.0077	87.0701	33.7373	29.1762	30.9781	28.2803	116.412	127.49	27.1367	84.0619	97.9398	133.988	87.0642	23.3133	112.134	93.4124	24.4782	25.905	144.827	43.1701	131.758	119.522	132.14	62.9002	49.8078	16.0336	59.5817	19.2123	85.4318	57.2932	94.8566	127.942	16.6627	136.078	17.6053	162.934
ENSSSCG00000021712	HERC6	HECT and RLD domain containing E3 ubiquitin protein ligase family member 6	555.638	-0.512062	0.183046	-2.79744	0.00515086	0.087843	942.373	936.664	934.241	450.014	890.54	84.3431	156.301	156.06	87.9831	404.58	906.24	71.2748	782.685	927.548	1154.78	930.499	130.635	720.242	719.439	36.9056	84.1273	917.698	191.182	758.166	927.654	674.426	716.515	605.995	75.3579	491.036	58.6223	671.494	471.567	537.521	912.58	91.8975	874.43	99.3284	1086.94
ENSSSCG00000029608	SEC62	SEC62 homolog, preprotein translocation factor	1265	-0.510692	0.177608	-2.87538	0.0040354	0.0771617	1188.65	2019.37	759.96	1058.86	2289.17	689.115	574.771	998.898	767.495	1538.17	1388.58	716.344	1514.25	1167.05	1356.46	934.126	495.608	977.574	1604.4	402.196	520.409	488.021	570.462	876.524	1350.06	1484.42	1692.84	1651.96	725.787	1820.32	708.393	1254.14	2795.25	1467.4	1863.66	637.728	2872.77	507.944	3605.98
ENSSSCG00000006079	RIDA	reactive intermediate imine deaminase A homolog	47.4677	-0.506371	0.175064	-2.89249	0.00382202	0.0749264	59.0554	68.823	43.8666	50.5363	76.0486	45.6078	33.761	45.5904	41.6349	5.72519	40.3718	30.0793	60.2065	42.7972	49.7276	25.3937	25.725	43.1283	73.7466	30.8802	27.1875	35.6921	27.7522	39.0807	78.7759	60.0634	62.9002	71.9447	50.773	30.8181	38.9173	59.8022	57.2932	44.5539	55.4794	51.503	65.5192	26.5166	73.9633
ENSSSCG00000009793	CLIP1	CAP-Gly domain containing linker protein 1	201.435	-0.50489	0.169832	-2.97288	0.00295022	0.066043	245.017	364.258	315.366	199.739	154.301	151.193	152.967	149.046	170.467	127.863	258.167	119.336	230.602	241.969	313.56	210.405	113.753	227.142	255.655	140.467	119.779	286.223	77.0894	208.803	205.089	173.326	226.988	201.998	138.958	195.182	121.186	76.8886	121.197	286.007	403.075	124.718	293.576	116.934	337.659
ENSSSCG00000013115	CD5	CD5 molecule	107.174	-0.504801	0.156139	-3.23301	0.00122492	0.0408602	51.5164	48.6797	117.373	46.9266	115.726	183.056	164.22	209.248	205.818	51.5267	66.9322	173.61	78.3821	76.5412	77.354	54.4151	200.976	41.6907	78.6631	228.212	177.488	41.8696	42.1422	100.493	76.0595	68.6439	62.9002	63.6433	208.437	65.7454	165.522	100.809	121.197	38.805	99.6365	149.46	79.379	183.442	63.244
ENSSSCG00000028905	TNIK	TRAF2 and NCK interacting kinase	107.949	-0.503761	0.151529	-3.32451	0.000885727	0.0332431	101.776	154.432	176.652	117.918	103.602	133.075	106.285	90.5964	126.476	59.1603	77.5563	105.604	96.5576	159.667	154.708	47.1598	101.292	76.1933	160.604	145.74	131.321	122.863	79.1451	137.341	152.119	101.25	123.066	94.0815	116.511	84.2363	99.0174	41.0072	83.7362	76.1727	122.281	87.3531	118.439	86.0701	58.9563
ENSSSCG00000028512	LDLR	low density lipoprotein receptor	127.117	-0.503583	0.172432	-2.92048	0.00349497	0.0707119	155.806	189.683	167.167	110.699	211.613	63.1012	65.8549	69.5546	65.9873	72.519	297.476	69.967	93.1497	148.967	167.14	116.086	73.9593	172.513	83.5795	111.47	112.341	212.78	107.925	173.072	154.835	144.152	147.679	83.0131	69.4789	119.163	51.7255	133.274	84.838	90.5449	270.604	55.0375	185.218	64.77	190.804
ENSSSCG00000017402	STAT5A	signal transducer and activator of transcription 5A	233.584	-0.50253	0.124471	-4.03732	5.4065e-05	0.00541766	265.121	258.506	418.512	155.219	364.813	98.7127	129.209	138.525	142.187	213.74	389.906	109.528	214.699	291.35	363.287	246.682	129.429	224.267	352.345	102.432	115.162	438.601	193.237	334.977	316.462	319.194	251.601	168.793	109.028	176.691	114.781	295.594	183.999	214.146	400.811	104.521	347.756	98.6764	317.292
ENSSSCG00000010674	FAM204A	family with sequence similarity 204 member A	253.682	-0.502455	0.161412	-3.11288	0.00185272	0.0519408	188.475	246.756	302.324	209.365	395.673	126.202	117.538	152.553	207.389	274.809	280.478	117.702	229.466	171.189	269.358	284.773	118.174	130.822	314.652	96.03	92.0783	107.076	124.371	215.502	346.342	329.491	257.07	381.86	194.541	373.927	185.719	360.522	576.237	219.895	360.05	201.973	656.452	107.588	569.196
ENSSSCG00000030680	TCF7	transcription factor 7 (T-cell specific, HMG-box)	368.943	-0.502373	0.128804	-3.90029	9.60793e-05	0.00795096	198.527	219.898	493.203	258.698	342.77	616.017	560.183	526.043	454.056	173.664	258.167	526.06	363.511	392.582	327.373	263.006	489.981	127.947	311.375	619.111	548.623	251.217	365.918	437.704	366.715	434.173	322.705	160.492	461.767	242.436	447.795	394.695	250.107	208.397	414.397	443.33	386.815	468.821	260.48
ENSSSCG00000017398	COASY	Coenzyme A synthase	42.4366	-0.501475	0.167324	-2.99703	0.00272628	0.063567	32.6689	21.8219	41.4955	20.4552	56.2098	42.4839	55.4348	69.5546	52.6327	43.8931	37.1845	49.0423	53.3907	40.3282	48.3462	9.06919	45.8226	25.877	49.1644	51.216	60.0176	27.4554	49.3372	53.5964	52.97	48.0507	41.0219	11.0684	44.894	36.9818	50.2477	41.0072	39.6645	21.5583	39.6282	53.5227	22.6797	55.2066	60.0282
ENSSSCG00000009090	KIAA1109	KIAA1109 ortholog	117.625	-0.499054	0.182497	-2.73459	0.00624577	0.0959777	110.572	139.325	109.074	91.4466	76.0486	273.647	208.818	230.29	120.977	41.9847	101.992	155.628	96.5576	142.383	116.031	74.3674	153.546	61.8172	95.0512	279.805	214.165	161.987	65.783	70.3453	97.7908	111.546	109.392	35.9723	128.803	49.309	126.112	25.6295	39.6645	61.8005	92.8431	142.391	76.8591	160.403	137.207
ENSSSCG00000027860	ERAP2	endoplasmic reticulum aminopeptidase 2	129.747	-0.498755	0.123176	-4.04914	5.14054e-05	0.00529581	164.601	147.718	201.549	108.292	155.404	79.9698	111.703	106.378	105.265	106.87	132.802	110.509	170.396	131.684	183.716	185.011	114.557	92.007	142.577	64.02	86.4356	143.455	80.173	208.803	186.074	199.067	142.209	85.7802	91.3914	100.673	94.5838	128.148	109.077	86.2333	192.48	119.669	170.098	74.9854	145.783
ENSSSCG00000011131	PRKCQ	protein kinase C theta	51.7692	-0.498527	0.178523	-2.79251	0.00523012	0.0883021	38.9514	23.5005	55.7225	30.0811	39.6775	52.4802	64.6045	40.9145	51.0616	36.2595	24.4356	46.7537	59.0706	49.3814	58.0155	39.9044	73.1554	34.5026	65.5526	47.8267	49.2452	28.1418	24.6686	102.726	62.4774	114.979	46.4914	63.6433	53.9797	53.4181	50.2477	75.1799	46.2753	33.0561	66.8018	57.0572	80.639	37.384	40.7334
ENSSSCG00000027349	-	TBC1 domain family member 14	62.0432	-0.498104	0.165665	-3.00669	0.00264106	0.0622816	50.2599	57.0727	79.4342	40.9103	58.4141	70.5983	85.0278	106.962	102.909	34.3511	41.4342	80.1024	77.2461	46.0893	63.5408	43.5321	80.3906	56.0668	37.6927	73.8113	79.254	69.325	21.585	50.2466	63.8356	37.7542	30.0827	47.0407	94.5982	36.9818	114.289	20.5036	46.2753	30.1816	64.5373	93.4123	39.0595	110.196	84.6826
ENSSSCG00000004222	NCOA7	nuclear receptor coactivator 7	408.667	-0.496996	0.174712	-2.84466	0.00444595	0.0817601	310.355	352.508	590.421	252.682	355.995	268.024	239.662	258.346	300.085	259.542	446.215	267.444	357.831	238.677	469.649	263.006	242.378	339.276	663.72	180.009	122.857	217.584	216.878	490.184	421.044	710.465	650.88	705.611	356.48	454.054	265.032	469.875	787.781	409.608	455.158	625.105	849.23	241.475	832.891
ENSSSCG00000017614	TRIM25	tripartite motif containing 25	154.124	-0.494458	0.167187	-2.95751	0.00310133	0.0670471	305.329	176.254	253.715	126.341	276.64	75.5964	62.9373	80.0755	65.2018	57.2519	196.547	60.8124	128.365	264.191	226.537	163.245	96.0667	107.821	298.264	56.8648	66.4298	161.301	86.3402	307.063	264.85	243.686	218.783	166.026	49.7041	182.854	53.696	174.281	123.401	165.28	173.232	55.0375	231.837	44.9912	164.006
ENSSSCG00000015446	PNPLA8	patatin like phospholipase domain containing 8	114.184	-0.491646	0.134216	-3.6631	0.000249184	0.014645	76.6464	147.718	139.899	122.731	146.586	63.1012	45.8483	80.66	65.9873	95.4198	175.299	55.5813	156.764	122.631	116.031	83.4365	52.2539	129.385	152.41	41.8013	32.5737	100.212	81.2009	118.359	123.597	142.436	172.292	124.52	108.494	84.2363	44.3362	172.572	172.981	116.415	187.951	88.363	167.578	87.5916	257.264
ENSSSCG00000031538	RNASE4	angiogenin	316.427	-0.491135	0.168904	-2.90778	0.00363999	0.0722742	462.391	454.903	542.998	374.209	285.458	148.694	135.878	143.785	186.179	347.328	499.335	129.472	371.463	448.548	577.392	321.049	125.811	424.095	627.666	146.869	76.6892	463.311	82.2287	446.637	410.178	451.334	366.462	276.71	180.111	304.072	163.551	158.903	267.735	386.613	442.703	144.41	352.796	186.051	426.629
ENSSSCG00000010765	INPP5A	inositol polyphosphate-5-phosphatase A	78.6462	-0.491078	0.167967	-2.92366	0.00345943	0.0703853	64.0814	167.861	98.4036	120.325	111.317	59.9773	34.5947	57.2803	93.482	127.863	123.24	63.755	80.654	42.7972	89.7859	48.9736	49.8422	115.009	96.69	48.5799	42.8331	78.9344	24.6686	110.543	88.2833	104.682	71.1046	105.15	59.8587	51.3636	62.5633	41.0072	41.8681	99.1683	113.223	45.4438	100.799	46.5127	84.6826
ENSSSCG00000014852	ARRB1	arrestin beta 1	114.276	-0.488552	0.143013	-3.41614	0.000635157	0.0264981	86.6984	141.003	132.786	122.731	106.909	144.32	150.883	160.151	159.469	82.061	131.74	143.203	89.7418	85.5945	102.218	50.7875	147.115	47.4411	90.1348	169.088	177.488	88.5438	51.3929	109.426	92.3579	142.436	125.8	66.4105	141.096	110.945	155.177	92.2663	50.6824	74.7355	157.38	126.738	128.518	160.186	61.1001
ENSSSCG00000022145	RPF1	ribosome production factor 1 homolog	61.2245	-0.488357	0.154796	-3.15484	0.00160584	0.0475441	36.4384	52.0369	64.0216	33.6909	51.8012	63.1012	75.0245	75.3996	38.4926	34.3511	56.308	63.428	80.654	65.0189	60.7781	59.8566	55.8714	44.5659	50.8032	56.4882	65.1473	30.201	48.3094	99.3766	67.9103	106.398	68.3698	58.1091	64.6688	55.4727	56.1591	46.1331	96.9577	53.1772	47.5538	65.1361	89.4589	58.9015	92.1862
ENSSSCG00000014670	TRIM22	tripartite motif protein TRIM5	436.251	-0.48474	0.123882	-3.91293	9.11813e-05	0.00760799	621.966	703.337	828.724	446.404	449.679	148.069	227.158	199.897	110.764	370.229	608.764	159.551	485.06	703.685	758.345	569.545	159.575	580.794	483.45	180.386	173.641	604.706	300.135	650.973	795.908	507.965	519.61	345.888	166.749	417.072	119.708	435.702	349.268	405.296	721.233	154.004	646.372	132.365	771.791
ENSSSCG00000013392	COPB1	COPI coat complex subunit beta 1	38.0843	-0.482053	0.150753	-3.19764	0.00138556	0.0435784	30.1559	53.7155	48.609	27.6746	25.3495	46.2325	54.6012	47.9284	32.2081	30.5343	42.4966	46.0998	38.6231	44.4433	37.2957	34.4629	46.2246	30.1898	45.8868	53.8521	45.6544	26.7691	21.585	36.8475	31.2387	29.1737	16.4087	27.671	47.5663	14.3818	35.9616	42.7159	38.5627	35.9305	49.8183	30.8008	44.0995	50.6423	42.8773
ENSSSCG00000009886	TRAFD1	TRAF-type zinc finger domain containing 1	151.405	-0.477195	0.161011	-2.96375	0.0030392	0.066995	273.917	176.254	266.757	156.422	209.409	59.3526	63.7709	63.1252	52.6327	97.3282	313.413	56.2352	145.404	252.668	269.358	166.873	71.5476	217.079	152.41	62.8902	55.4009	282.791	83.2566	157.439	262.134	152.733	131.27	88.5473	61.4621	154.091	60.1001	126.439	141.029	146.597	254.753	62.6115	201.598	64.1179	291.566
ENSSSCG00000017492	ORMDL3	ORMDL sphingolipid biosynthesis regulator 3	169.422	-0.476751	0.170965	-2.78858	0.00529397	0.0884151	108.059	251.791	183.766	115.512	171.936	134.949	103.367	122.743	188.535	318.702	231.607	154.974	185.163	121.808	205.817	112.458	91.2433	104.945	298.264	89.628	79.254	69.325	173.708	198.753	176.567	226.525	218.783	190.93	190.265	141.763	80.2977	175.989	231.376	129.35	198.141	196.923	282.237	123.671	228.322
ENSSSCG00000015769	SPCS3	signal peptidase complex subunit 3	29.4241	-0.476496	0.175255	-2.71888	0.00655037	0.0985582	21.3605	47.0011	22.5261	14.4389	24.2474	36.2363	29.593	30.3936	38.4926	22.9008	36.1221	33.0218	28.3993	24.6907	33.1517	29.0214	43.009	11.5009	27.8598	23.3485	34.3691	15.7869	28.7801	18.9821	35.3133	30.8898	32.8175	16.6026	35.8083	20.5454	38.4247	37.59	26.443	20.1211	26.0414	31.8107	54.1794	39.9922	25.7264
ENSSSCG00000006071	VPS13B	vacuolar protein sorting 13 homolog B	43.4381	-0.476152	0.173262	-2.74816	0.00599312	0.0942469	36.4384	70.5016	33.1964	42.1136	28.656	53.1049	71.2733	59.6183	26.7092	22.9008	50.9959	55.2543	34.0792	55.1426	48.3462	38.0906	59.891	33.065	37.6927	60.6307	65.4038	43.9287	46.2537	54.713	61.1192	54.9151	41.0219	8.30131	49.7041	24.6545	45.814	17.0864	8.81433	34.4933	31.7025	55.0375	31.4996	53.6852	48.2369
ENSSSCG00000017248	COG1	component of oligomeric golgi complex 1	40.0367	-0.475251	0.170084	-2.79421	0.00520262	0.0881303	33.9254	53.7155	56.9081	21.6584	47.3926	55.604	62.5205	54.3578	44.7771	13.3588	23.3731	43.4842	30.6712	46.0893	42.8209	36.2768	49.0382	12.9385	19.6658	56.1116	57.4528	23.3371	47.2815	39.0807	44.8208	39.4703	27.3479	38.7394	42.7562	49.309	36.9468	27.3382	26.443	31.6189	47.5538	43.4241	39.0595	47.5994	47.165
ENSSSCG00000005915	-	-	194.387	-0.474464	0.113263	-4.18906	2.80113e-05	0.00339992	193.501	243.398	285.726	168.454	180.753	183.056	130.043	188.791	214.459	234.733	345.285	180.476	199.931	120.984	209.961	145.107	153.144	230.018	283.515	126.534	108.237	136.591	135.677	187.587	158.91	248.834	166.822	260.108	200.954	110.945	142.861	187.95	187.305	152.345	246.827	202.982	255.777	173.444	299.069
ENSSSCG00000004551	ZNF609	zinc finger protein 609	57.5472	-0.473275	0.172431	-2.74472	0.00605627	0.094504	42.7209	109.11	62.836	80.6174	49.5969	78.7203	89.1958	59.6183	60.4884	9.54198	54.1832	79.4485	55.6626	80.6563	52.4902	63.4843	80.7925	31.6274	39.3315	75.3176	72.5854	50.7926	47.2815	73.695	50.2536	54.9151	38.2871	22.1368	60.9276	43.1454	69.46	20.5036	49.5806	48.8655	57.7439	61.0967	52.9194	48.2514	66.4598
ENSSSCG00000010931	-	adiponectin receptor 1	3453.84	-0.472523	0.154503	-3.05834	0.00222567	0.0569653	3098.52	5485.69	4641.57	4077.8	4490.17	2309.75	1469.65	2175.48	2588.43	4314.88	4775.56	1919.84	3606.71	2058.38	3696.41	2443.24	1246.46	3744.97	4760.76	1493.55	794.849	1503.19	1705.22	3439.1	3247.47	4997.28	4249.87	5047.19	3645.5	4456.3	2017.79	3509.54	5717.2	3692.22	4367.02	3204.8	6338.98	880.045	7488.52
ENSSSCG00000031114	SLFN14	schlafen family member 14	589.414	-0.471888	0.141952	-3.32428	0.000886457	0.0332431	483.752	809.09	663.928	511.379	669.007	244.283	150.049	330.823	312.654	797.71	808.498	282.811	667.952	451.84	589.824	542.338	130.635	424.095	888.237	216.915	129.525	283.477	441.979	611.892	590.819	878.642	590.715	874.404	611.949	1119.73	370.946	722.753	1067.64	643.875	833.324	413.539	1185.65	362.755	1277.74
ENSSSCG00000031871	ENTPD4	ectonucleoside triphosphate diphosphohydrolase 4	98.032	-0.471079	0.157312	-2.99456	0.00274841	0.0638842	86.6984	55.3941	154.126	73.398	101.398	98.0879	92.1135	74.8151	83.2697	43.8931	138.114	99.7193	118.141	108.639	117.412	108.83	73.5574	71.8805	80.3019	71.5517	64.3779	129.727	102.786	232.251	126.313	111.546	92.9829	55.342	66.2722	76.0181	71.9231	136.691	74.9218	80.4844	117.752	92.4024	141.118	82.1579	116.841
ENSSSCG00000016512	ZC3HAV1	zinc finger CCCH-type containing, antiviral 1	182.2	-0.468551	0.120717	-3.88141	0.000103853	0.00825587	190.988	218.219	220.519	151.609	190.673	249.906	161.72	173.594	128.047	72.519	216.733	164.782	249.914	194.234	248.638	215.847	159.173	130.822	175.353	207.5	170.819	184.638	135.677	242.3	258.059	192.203	183.231	138.355	169.956	125.327	177.837	216.997	135.52	127.913	178.893	111.59	224.277	174.531	236.897
ENSSSCG00000006736	CD2	CD2 molecule	191.427	-0.463946	0.154285	-3.00708	0.00263772	0.0622816	120.624	117.503	289.283	109.495	189.57	262.401	267.588	244.902	245.096	131.679	83.9308	267.444	178.348	181.888	140.895	134.224	274.936	61.8172	181.908	309.932	291.624	131.786	130.538	227.785	195.582	233.389	172.292	118.985	258.675	127.382	244.834	271.673	142.131	76.1727	155.116	242.872	236.877	255.82	158.646
ENSSSCG00000012727	FMR1	FMRP translational regulator 1	64.8057	-0.46206	0.159964	-2.88853	0.00387049	0.0755831	61.5684	53.7155	77.063	25.2682	66.1292	56.2288	54.1844	70.1391	51.8472	43.8931	49.9335	65.3897	70.4303	68.311	85.6419	116.086	61.9007	58.942	73.7466	59.8775	68.4816	56.97	47.2815	119.475	127.671	60.0634	43.7567	66.4105	51.8419	39.0363	52.7108	76.8886	50.6824	33.0561	65.6695	72.7101	98.2788	53.2505	72.8914
ENSSSCG00000009148	LEF1	lymphoid enhancer binding factor 1	153.881	-0.461012	0.155514	-2.96444	0.00303235	0.0669903	111.828	83.9305	144.641	83.0239	94.7852	283.018	238.828	243.149	196.391	57.2519	84.9932	250.77	155.628	131.684	145.039	90.6919	256.446	23.0018	134.383	307.296	265.206	109.822	123.343	203.22	177.925	132.14	139.474	94.0815	223.936	73.9635	214.291	169.155	81.5326	60.3633	110.959	179.251	162.538	251.907	111.481
ENSSSCG00000004385	SNX3	sorting nexin 3	1213.81	-0.456317	0.140183	-3.25516	0.00113329	0.0385243	1253.98	2155.33	2027.35	1325.98	2194.39	1125.2	496.829	834.071	967.814	1351.14	1322.71	683.65	995.112	1013.97	1225.23	1026.63	319.151	976.137	1488.04	517.056	331.636	655.499	564.295	655.439	1426.12	1196.12	1219.72	1707.3	929.948	2159.32	652.727	1182.38	2150.7	1248.95	2079.91	904.332	1999.6	526.419	2448.29
ENSSSCG00000032984	-	BEN domain containing 7	75.1122	-0.456085	0.148544	-3.07038	0.00213786	0.0560333	59.0554	125.896	77.063	101.073	65.027	56.8535	64.1877	90.5964	91.9109	38.1679	112.616	59.5046	71.5662	89.7096	77.354	74.3674	55.8714	51.7539	62.2749	79.0835	60.0176	68.6386	52.4208	72.5784	73.3431	120.127	84.7785	74.7118	55.5831	51.3636	75.3715	42.7159	83.7362	79.0472	83.7853	63.6213	115.919	49.7729	117.913
ENSSSCG00000014239	CEP120	centrosomal protein 120	47.5912	-0.455862	0.131396	-3.46938	0.000521667	0.0236177	37.6949	40.2866	58.0937	46.9266	39.6775	53.1049	54.6012	40.9145	47.9194	34.3511	45.6839	48.7153	48.8468	46.9124	51.1089	36.2768	50.2441	38.8155	55.7197	47.0735	52.0666	48.7334	39.0586	66.9955	55.6864	63.4956	30.0827	27.671	47.0319	57.5272	44.8288	47.8418	36.3591	20.1211	48.686	62.6115	46.6194	49.7729	87.8984
ENSSSCG00000038619	PAFAH2	platelet activating factor acetylhydrolase 2	49.6315	-0.453644	0.161204	-2.81411	0.00489131	0.0853767	64.0814	60.4299	86.5477	26.4714	41.8818	27.4896	29.1762	47.9284	43.9915	40.0763	70.1194	54.9274	69.2943	77.3642	74.5913	54.4151	33.764	48.8787	29.4987	33.1398	51.0406	41.1832	48.3094	70.3453	76.0595	29.1737	35.5523	44.2736	53.9797	41.0909	39.9025	41.0072	50.6824	48.8655	45.2893	43.929	61.7393	38.036	61.1001
ENSSSCG00000016237	DOCK10	dedicator of cytokinesis 10	204.048	-0.449917	0.140117	-3.21101	0.00132272	0.0422599	304.072	256.827	296.396	214.178	228.146	179.307	142.963	160.736	117.834	95.4198	261.354	127.51	149.948	278.182	379.863	232.171	144.301	143.761	196.658	173.984	139.015	265.631	120.26	322.695	347.701	291.737	284.418	146.656	138.958	184.909	130.053	158.903	163.065	182.527	263.81	115.124	264.597	111.935	242.257
ENSSSCG00000035454	B4GALT1	beta-1,4-galactosyltransferase 1	110.932	-0.449045	0.151794	-2.95825	0.00309388	0.0670471	162.088	119.181	180.209	149.202	111.317	71.8478	70.8565	60.2028	79.3419	80.1526	150.863	72.5826	146.54	159.667	176.809	97.9472	63.9105	165.325	113.078	72.6815	71.5595	181.206	59.6158	121.708	124.955	145.868	87.5133	105.15	72.6856	59.5817	63.5485	71.7627	90.3469	97.731	184.554	77.2545	110.879	73.6813	222.962
ENSSSCG00000007637	TRIM4	tripartite motif containing 4	71.9916	-0.446232	0.16115	-2.76905	0.00562208	0.0910236	65.3379	35.2508	86.5477	39.7071	45.1883	111.208	128.375	84.167	69.1296	32.4427	73.3067	83.6988	78.3821	70.78	67.6847	41.7183	90.0374	34.5026	50.8032	139.338	119.522	67.9522	89.4237	116.126	110.015	51.4829	51.961	30.4381	95.6671	45.1999	84.2387	47.8418	39.6645	56.0516	62.2728	85.3334	98.2788	76.0721	52.5247
ENSSSCG00000033272	DNAJB6	DnaJ heat shock protein family (Hsp40) member B6	502.73	-0.443511	0.13766	-3.22177	0.00127401	0.0414916	403.336	666.408	533.513	416.323	621.614	384.855	269.255	340.175	329.151	400.763	443.027	210.555	596.385	506.16	592.587	451.646	230.721	487.35	945.596	310.685	196.724	350.057	269.299	514.749	656.013	813.43	519.61	1007.23	466.577	632.799	294.097	567.267	743.709	523.149	613.67	497.357	826.55	199.092	775.007
ENSSSCG00000015284	MDM4	MDM4 regulator of p53	153.564	-0.436749	0.123016	-3.55033	0.000384754	0.0194224	120.624	156.111	212.22	122.731	101.398	215.544	245.08	248.409	122.548	80.1526	171.049	193.881	163.58	152.259	165.759	117.899	191.732	130.822	91.7736	199.592	222.373	152.378	141.845	212.152	179.283	133.856	123.066	77.4789	200.42	96.5635	175.867	80.3058	88.1433	102.043	134.736	197.933	123.479	176.705	167.221
ENSSSCG00000035209	-	acidic nuclear phosphoprotein 32 family member E	389.576	-0.435861	0.160958	-2.70791	0.00677077	0.0999382	231.196	495.19	429.182	380.226	564.302	199.924	168.805	215.678	168.111	582.061	549.269	228.21	276.041	258.429	437.879	509.688	212.231	231.455	355.623	161.556	147.479	170.91	247.714	420.955	437.342	655.549	407.484	760.953	330.292	408.854	291.633	545.055	579.543	300.379	672.547	381.728	832.85	202.134	744.993
ENSSSCG00000038752	C6orf62	chromosome 7 C6orf62 homolog	271.969	-0.434	0.10814	-4.0133	5.98745e-05	0.00575708	245.017	337.4	339.077	233.43	230.35	291.14	246.747	291.077	229.384	160.305	285.79	262.54	336.248	198.349	270.739	179.57	241.976	211.329	381.844	278.299	225.451	235.43	224.073	332.744	311.029	387.838	388.34	298.847	287.536	244.491	251.238	218.705	197.221	195.462	303.439	326.186	282.237	264.296	381.608
ENSSSCG00000016074	ANKRD44	ankyrin repeat domain 44	84.9842	-0.433046	0.142295	-3.0433	0.00233997	0.0581881	46.4904	65.4658	75.8774	48.1298	47.3926	129.326	138.379	134.433	115.478	36.2595	44.6215	159.551	61.3425	59.2577	62.1594	77.995	136.262	48.8787	95.0512	114.106	129.525	67.2658	70.9223	139.574	93.7162	92.6693	46.4914	49.8078	118.649	73.9635	135.964	59.8022	44.0717	31.6189	69.0662	127.748	75.5991	112.152	79.323
ENSSSCG00000024881	TCP11L2	t-complex 11 like 2	287.638	-0.432029	0.152366	-2.83547	0.00457576	0.0826421	163.345	377.687	259.643	217.787	327.34	276.77	239.245	303.352	260.021	213.74	252.855	240.634	441.893	184.357	334.28	192.267	198.967	253.019	450.674	155.531	157.226	203.857	266.215	393.04	334.118	439.321	415.688	487.01	244.245	217.782	148.28	251.169	319.52	280.258	330.612	341.334	391.855	276.685	376.248
ENSSSCG00000039751	NLRC5	NLR family CARD domain containing 5	467.329	-0.430453	0.128147	-3.35907	0.000782062	0.0302906	706.152	528.762	672.227	453.623	567.609	415.468	395.963	451.813	281.232	267.175	745.816	336.43	556.626	665.826	576.011	442.576	308.298	539.104	470.34	303.53	281.621	743.356	441.979	640.923	594.894	446.185	426.627	320.984	296.621	431.454	250.253	358.813	262.226	400.985	583.1	336.789	633.772	306.027	784.654
ENSSSCG00000003763	IFI44	interferon induced protein 44	184.971	-0.428735	0.153588	-2.79145	0.00524718	0.0883442	307.842	270.256	336.706	134.763	254.597	18.7429	23.341	16.9503	21.9958	265.267	295.352	19.9439	174.94	333.325	341.186	266.634	24.9211	257.332	255.655	14.6869	19.7494	218.271	56.5322	270.215	335.477	226.525	199.64	201.998	14.9647	221.891	15.764	312.68	218.155	229.955	314.761	18.1775	361.616	18.2573	324.795
ENSSSCG00000022299	ACTR10	actin related protein 10	321.56	-0.428226	0.151551	-2.82563	0.00471883	0.0838756	330.459	612.692	350.933	411.51	600.673	218.667	127.125	263.022	218.387	368.32	498.273	163.474	253.322	168.72	279.027	299.283	109.733	245.831	488.367	111.847	87.9746	146.887	185.015	241.184	457.715	329.491	333.644	453.805	246.383	486.927	164.536	374.191	564.117	346.37	432.513	252.971	517.854	119.977	679.605
ENSSSCG00000005631	FAM102A	family with sequence similarity 102 member A	112.221	-0.426641	0.114995	-3.71008	0.000207194	0.0130143	82.9289	68.823	128.043	79.4142	104.705	193.052	165.054	150.215	189.321	47.7099	69.057	174.918	115.869	108.639	85.6419	54.4151	179.271	73.3181	90.1348	230.849	191.851	89.9166	71.9501	88.2107	127.671	77.2244	60.1654	60.8762	165.68	71.909	184.734	75.1799	83.7362	47.4283	90.5787	136.331	85.679	173.227	102.905
ENSSSCG00000027660	IFI44L	interferon-induced protein 44-like	264.168	-0.426586	0.149793	-2.84783	0.00440184	0.0813099	415.901	362.58	497.946	205.755	412.205	91.8403	65.8549	92.3499	54.2039	213.74	361.221	91.5456	299.897	344.847	378.482	420.81	96.8706	255.894	296.625	50.0862	78.9976	288.969	114.092	444.403	450.924	319.194	388.34	293.313	61.9965	308.181	64.0411	452.788	260.023	263.011	431.381	68.6707	510.294	66.5087	428.773
ENSSSCG00000037609	-	-	34.4181	-0.424881	0.156381	-2.71696	0.0065884	0.0986738	28.8995	20.1433	35.5676	10.8292	40.7797	41.8592	47.9323	40.33	48.7049	26.7175	30.81	50.677	43.1669	27.9828	44.2023	25.3937	35.3719	33.065	27.8598	38.7886	49.5017	23.3371	22.6129	44.6637	39.3879	25.7415	30.0827	16.6026	36.8772	22.6	52.7108	23.9209	38.5627	31.6189	24.9091	43.929	37.7995	39.7748	38.5896
ENSSSCG00000004169	HBS1L	HBS1 like translational GTPase	156.151	-0.420129	0.147023	-2.85757	0.00426899	0.079875	126.906	285.364	129.229	149.202	205	128.701	66.6885	126.25	131.189	326.336	304.913	108.874	141.997	124.277	122.938	116.086	63.5086	92.007	175.353	73.0581	63.0955	98.1532	129.51	138.457	137.179	154.449	147.679	229.669	100.477	113	140.398	158.903	250.107	156.657	287.587	105.531	311.216	103.023	266.911
ENSSSCG00000034444	EIF4EBP2	eukaryotic translation initiation factor 4E binding protein 2	126.775	-0.41766	0.129593	-3.22287	0.00126914	0.0414916	172.14	250.113	157.683	90.2434	126.748	153.067	142.963	105.793	138.259	135.496	110.491	146.473	107.917	130.861	104.98	97.9472	112.145	132.26	145.854	158.92	125.934	119.431	88.3959	128.408	137.179	168.178	98.4525	138.355	135.217	92.4544	136.949	56.385	81.5326	79.0472	120.017	103.511	165.058	113.239	136.135
ENSSSCG00000000257	ITGB7	integrin subunit beta 7	309.554	-0.416403	0.126586	-3.2895	0.00100367	0.0359328	255.069	208.148	265.571	168.454	243.576	529.175	451.814	479.284	502.761	175.572	293.227	493.039	452.117	269.129	247.256	96.1334	560.322	169.638	278.598	503.122	552.213	293.087	242.575	180.888	309.671	240.254	194.17	196.464	451.078	178.745	540.409	172.572	211.544	137.973	217.389	326.691	206.638	487.731	290.494
ENSSSCG00000001680	ABCC10	ATP binding cassette subfamily C member 10	69.0414	-0.413653	0.134072	-3.0853	0.00203347	0.0540261	69.1074	47.0011	81.8054	63.772	66.1292	69.9736	105.451	108.716	83.2697	34.3511	78.6187	113.778	98.8296	76.5412	63.5408	34.4629	110.537	35.9402	62.2749	99.0427	120.805	58.3428	57.5601	83.7444	101.865	65.2117	51.961	44.2736	68.9444	24.6545	70.9379	42.7159	45.1735	61.8005	33.967	59.077	49.1394	84.9834	64.3159
ENSSSCG00000014820	FCHSD2	FCH and double SH3 domains 2	213.348	-0.413649	0.122074	-3.38852	0.000702715	0.0281287	285.225	228.291	316.551	180.487	247.984	185.555	249.665	172.425	131.975	166.03	267.729	163.801	204.475	241.146	328.754	243.054	191.33	129.385	193.38	135.572	174.923	245.04	146.984	331.628	305.596	295.169	180.496	177.095	120.252	240.382	149.758	164.029	204.933	227.081	237.769	141.381	282.237	123.237	309.788
ENSSSCG00000038003	ITK	IL2 inducible T cell kinase	82.4251	-0.412773	0.151763	-2.71985	0.00653123	0.0985582	57.7989	60.4299	105.517	63.772	50.699	136.199	110.453	119.821	113.121	32.4427	42.4966	115.086	73.8382	76.5412	67.6847	29.0214	126.213	24.4394	86.8572	148.752	135.937	49.4198	65.783	92.6771	76.0595	60.0634	68.3698	63.6433	149.112	84.2363	111.826	73.4713	38.5627	63.2377	57.7439	107.55	103.319	111.283	61.1001
ENSSSCG00000013744	TRMT1	tRNA methyltransferase 1	37.0232	-0.411762	0.148336	-2.77587	0.00550535	0.0900843	13.8215	25.1791	42.6811	24.0649	54.0055	50.6059	54.6012	38.5765	36.9215	38.1679	25.498	41.1955	45.4389	49.3814	26.2451	32.6491	46.2246	33.065	45.8868	53.8521	46.6804	31.5738	34.9472	30.148	40.7462	48.0507	24.6131	24.9039	56.1175	26.7091	38.9173	27.3382	29.7484	21.5583	39.6282	39.8896	34.0196	42.383	27.8702
ENSSSCG00000009042	OTUD4	OTU deubiquitinase 4	50.7138	-0.410982	0.136163	-3.01831	0.00254192	0.0620525	50.2599	40.2866	45.0522	32.4876	66.1292	63.1012	62.1037	59.0338	43.9915	32.4427	61.6201	61.4663	60.2065	62.5498	52.4902	19.9522	50.6461	35.9402	55.7197	65.9029	63.0955	46.6743	38.0308	87.0941	54.3282	66.9278	38.2871	41.5065	44.3596	61.6363	48.7698	58.0936	50.6824	31.6189	40.7604	39.8896	50.3994	44.9912	49.3089
ENSSSCG00000002404	SPTLC2	serine palmitoyltransferase long chain base subunit 2	105.504	-0.407099	0.127666	-3.18879	0.00142871	0.0446572	131.932	105.752	132.786	90.2434	91.4787	147.444	128.792	169.503	91.9109	59.1603	107.304	155.628	97.6936	88.8866	124.319	94.3196	102.096	56.0668	81.9407	153.648	119.779	74.1297	89.4237	118.359	131.746	101.25	68.3698	88.5473	127.734	67.7999	167	95.6836	63.9039	60.3633	70.1985	85.3334	124.739	131.496	117.913
ENSSSCG00000000370	DGKA	diacylglycerol kinase alpha	106.604	-0.403159	0.135044	-2.98539	0.0028322	0.0648387	84.1854	92.3235	143.456	50.5363	70.5378	171.185	165.054	168.918	130.404	59.1603	77.5563	171.648	98.8296	99.5859	104.98	39.9044	151.134	58.942	81.9407	238.004	173.897	91.2893	77.0894	149.623	71.9849	80.6566	87.5133	52.5749	170.49	73.9635	138.427	82.0145	70.5147	73.2983	86.0497	99.4715	93.2389	152.144	75.0353
ENSSSCG00000030289	PTPN11	protein tyrosine phosphatase non-receptor type 11	84.761	-0.402094	0.128189	-3.13673	0.00170842	0.0492878	76.6464	87.2877	126.858	73.398	85.9679	59.3526	80.0262	86.5049	69.9151	47.7099	87.1181	85.9875	84.0619	75.7182	121.556	76.1812	50.6461	74.7557	83.5795	76.4474	73.0984	76.8752	66.8108	152.973	122.238	101.25	125.8	63.6433	82.8402	86.2908	69.9526	70.054	69.4129	100.605	89.4464	76.7496	109.619	53.2505	105.049
ENSSSCG00000010151	LYST	lysosomal trafficking regulator	105.682	-0.401756	0.141967	-2.82992	0.00465591	0.0832689	75.3899	67.1444	107.888	64.9752	55.1077	268.648	186.311	176.517	162.612	19.084	82.8684	163.801	109.053	99.5859	70.4474	65.2982	172.036	66.13	99.9677	259.469	192.621	91.2893	76.0616	85.9775	80.1341	60.0634	57.4306	38.7394	158.732	69.8545	157.147	49.5504	47.377	41.6794	60.0084	145.42	83.159	170.401	83.6107
ENSSSCG00000030820	STK4	serine/threonine kinase 4	237.002	-0.401734	0.0971604	-4.13475	3.55336e-05	0.00398608	256.326	329.007	270.313	209.365	216.022	306.759	272.172	294	252.951	139.313	248.605	294.908	219.243	257.606	313.56	168.687	249.613	172.513	172.075	312.568	289.829	251.217	179.875	284.731	209.164	233.389	185.966	163.259	255.468	178.745	309.861	205.036	120.095	191.15	236.637	234.288	245.697	254.733	258.336
ENSSSCG00000011121	CELF2	CUGBP Elav-like family member 2	150.362	-0.400916	0.137043	-2.92547	0.00343936	0.0701934	148.267	224.934	164.796	137.17	112.42	223.041	152.133	151.968	128.047	68.7023	194.422	179.168	137.453	190.118	160.233	146.921	140.684	181.139	163.881	191.307	177.744	216.212	134.65	136.224	181.999	175.042	95.7177	99.6157	146.975	104.782	162.073	58.0936	100.263	94.8566	135.868	135.322	158.758	160.186	192.948
ENSSSCG00000016263	-	nuclear body protein SP140-like protein	205.656	-0.395708	0.132384	-2.98909	0.00279814	0.0642045	211.092	258.506	282.169	157.625	135.565	142.446	220.489	192.883	91.1253	164.122	230.544	162.493	231.738	209.871	255.544	248.496	157.566	184.014	147.493	186.035	197.494	188.07	164.457	291.43	327.327	274.576	246.131	182.629	106.891	135.6	193.109	158.903	241.292	196.899	281.926	202.982	308.696	142.581	309.788
ENSSSCG00000035747	YIPF4	Yip1 domain family member 4	59.3357	-0.393549	0.140931	-2.7925	0.00523025	0.0883021	75.3899	70.5016	68.7639	49.3331	83.7636	58.103	40.0131	59.6183	64.4162	53.4351	62.6825	49.6962	68.1583	41.9742	42.8209	34.4629	34.166	50.3163	77.0243	41.4247	34.882	34.3193	42.1422	52.4798	55.6864	80.6566	65.635	60.8762	60.9276	67.7999	47.7845	90.5577	83.7362	40.2422	58.8761	61.0967	99.5388	37.1667	113.625
ENSSSCG00000004635	SPPL2A	signal peptide peptidase like 2A	62.1603	-0.389469	0.129313	-3.01183	0.00259681	0.0622816	77.9029	77.216	87.7333	52.9428	50.699	51.8554	70.0229	69.5546	58.9172	34.3511	87.1181	65.3897	76.1101	74.0721	84.2606	65.2982	55.0675	56.0668	45.8868	62.5136	67.1992	52.1653	52.4208	54.713	78.7759	77.2244	98.4525	49.8078	48.6352	32.8727	62.0706	42.7159	46.2753	44.5539	66.8018	57.0572	50.3994	46.9474	92.1862
ENSSSCG00000001507	ZBTB22	zinc finger and BTB domain containing 22	413.195	-0.384977	0.108844	-3.53696	0.000404768	0.0200692	559.142	515.333	564.338	471.672	534.544	215.544	286.344	275.296	253.737	410.305	674.634	270.06	519.139	612.33	683.754	400.858	243.583	541.979	416.259	207.123	202.111	617.061	348.444	460.036	562.297	403.283	443.036	326.518	219.126	306.127	262.569	466.457	267.735	330.561	580.836	262.059	521.634	202.352	676.389
ENSSSCG00000025704	DENND2D	DENN domain containing 2D	119.994	-0.384932	0.124631	-3.08858	0.00201119	0.0539913	114.341	90.6449	151.755	56.5525	83.7636	159.315	159.219	144.954	157.898	74.4274	90.3053	198.785	132.909	139.091	110.506	117.899	135.458	56.0668	137.66	193.566	157.739	91.2893	103.814	140.691	120.88	123.559	87.5133	63.6433	132.544	98.6181	149.758	117.896	105.772	74.7355	116.62	120.679	157.498	126.714	84.6826
ENSSSCG00000012956	PACS1	phosphofurin acidic cluster sorting protein 1	229.166	-0.382594	0.130789	-2.92527	0.00344154	0.0701934	267.634	411.259	386.501	311.641	209.409	226.165	195.897	228.537	304.013	234.733	251.792	201.727	219.243	154.728	273.502	166.873	217.858	192.64	254.016	195.449	182.105	190.815	141.845	252.35	221.387	295.169	142.209	318.217	239.969	152.036	229.563	191.367	148.742	199.774	312.496	227.724	254.517	203.873	129.704
ENSSSCG00000013533	RANBP3	RAN binding protein 3	60.2611	-0.378612	0.138229	-2.73903	0.00616214	0.0954186	45.2339	73.8588	68.7639	49.3331	54.0055	61.2269	83.7774	80.0755	80.913	36.2595	54.1832	68.3323	82.926	64.1958	51.1089	30.8352	73.5574	46.0035	40.9704	64.7732	64.6344	59.0292	76.0616	65.8789	63.8356	70.36	24.6131	55.342	81.7713	53.4181	82.2682	32.4641	42.9699	56.0516	89.4464	65.6411	40.3195	61.075	54.6685
ENSSSCG00000017072	GALNT10	polypeptide N-acetylgalactosaminyltransferase 10	94.4072	-0.378466	0.13869	-2.72886	0.00635538	0.097071	124.393	94.0021	113.816	101.073	84.8658	116.206	107.952	97.0258	111.55	68.7023	130.677	95.7959	130.637	88.0635	113.268	79.8089	112.547	113.571	75.3855	90.3812	75.4068	115.313	76.0616	69.2287	92.3579	114.979	73.8394	55.342	111.166	49.309	110.348	54.6763	48.4788	64.675	105.298	89.8778	81.899	89.5477	154.358
ENSSSCG00000008942	-	MOB kinase activator 1B	313.458	-0.37816	0.138177	-2.73677	0.00620455	0.0955942	276.43	510.297	404.285	433.168	384.651	178.058	167.138	220.938	212.888	435.114	420.717	157.589	369.191	222.216	366.05	331.932	96.0667	251.582	594.89	139.714	93.3607	209.348	250.798	426.538	363.999	561.164	391.075	456.572	177.973	345.163	133.501	314.389	390.034	290.319	377.034	247.416	467.454	151.709	404.118
ENSSSCG00000001912	PML	promyelocytic leukemia	362.037	-0.375678	0.122473	-3.06744	0.00215901	0.0560425	552.859	478.404	563.153	286.372	406.695	119.955	187.978	161.32	145.329	341.603	470.65	124.24	402.134	549.78	620.213	516.944	165.203	311.961	449.035	102.809	123.113	485.961	218.934	621.941	632.924	466.779	429.362	337.586	173.697	417.072	98.5248	565.558	376.813	336.31	495.918	156.024	628.732	98.0243	499.52
ENSSSCG00000011201	SATB1	SATB homeobox 1	103.248	-0.370606	0.13385	-2.76883	0.00562587	0.0910236	62.8249	72.1802	118.559	74.6012	60.6184	144.32	163.387	146.123	120.977	47.7099	61.6201	122.279	99.9656	93.0017	93.9298	92.5057	148.723	37.3778	116.356	134.819	144.914	55.5973	96.6187	149.623	126.313	85.8049	68.3698	49.8078	138.423	94.509	119.215	104.227	107.976	79.0472	100.769	162.083	118.439	139.103	73.9633
ENSSSCG00000003512	EIF4G3	eukaryotic translation initiation factor 4 gamma 3	122.216	-0.369734	0.132933	-2.78136	0.00541311	0.0892987	123.137	125.896	143.456	128.747	112.42	143.696	118.372	122.159	87.1975	83.9694	186.985	119.009	145.404	167.897	149.183	116.086	122.194	142.323	137.66	117.872	111.571	184.638	92.5073	127.291	110.015	118.411	76.5741	47.0407	120.786	96.5635	143.846	64.9281	105.772	113.54	126.81	115.629	125.998	105.414	185.444
ENSSSCG00000009403	ITM2B	integral membrane protein 2B	282.417	-0.367154	0.126533	-2.90164	0.00371214	0.0734858	271.404	317.257	320.108	312.844	247.984	294.889	235.911	295.169	384.926	316.794	321.912	236.384	315.8	231.27	385.389	134.224	295.435	257.332	303.181	309.179	232.889	259.454	96.6187	330.511	234.969	302.033	191.435	376.326	269.899	246.545	359.123	242.626	296.382	255.825	292.116	237.823	341.456	323.198	337.659
ENSSSCG00000017406	STAT5B	signal transducer and activator of transcription 5B	194.279	-0.366071	0.106905	-3.42425	0.000616505	0.0261327	212.348	275.292	309.438	196.129	223.737	148.694	133.377	160.151	169.682	194.656	286.852	147.781	156.764	206.579	266.595	125.155	127.017	221.392	216.323	139.338	137.476	307.501	131.566	235.601	249.91	171.61	164.087	160.492	144.302	176.691	147.787	199.91	176.287	175.341	276.265	146.935	204.118	162.142	291.566
ENSSSCG00000009293	-	spermatogenesis associated 13	164.72	-0.365829	0.0957684	-3.81994	0.000133484	0.0096261	92.9808	87.2877	142.27	93.8531	131.156	226.789	273.006	249.578	192.463	93.5114	113.678	221.671	160.172	198.349	164.377	145.107	262.073	69.0053	167.159	301.271	306.244	121.49	174.736	178.655	196.94	159.597	161.353	94.0815	173.163	121.218	217.247	134.982	105.772	66.1122	166.438	185.815	148.678	199.309	126.488
ENSSSCG00000016261	SP110	SP110 nuclear body protein	99.1297	-0.365435	0.115949	-3.15169	0.00162328	0.04792	131.932	115.824	136.342	72.1947	114.624	92.4651	98.3655	100.533	82.4841	61.0687	87.1181	99.3924	121.549	121.808	117.412	65.2982	112.547	83.3813	104.884	82.4728	100.542	120.804	86.3402	123.942	118.164	104.682	82.0437	91.3144	75.3579	88.3453	94.0912	99.1008	89.2451	73.2983	75.8596	93.4123	132.298	67.5955	147.927
ENSSSCG00000012619	SEPTIN6	septin 6	161.925	-0.361484	0.113988	-3.17124	0.00151792	0.045727	111.828	78.8946	141.085	90.2434	119.033	291.765	222.99	222.107	227.028	99.2366	111.554	222.652	170.396	203.287	135.369	97.9472	259.662	58.942	152.41	282.818	282.134	126.981	155.207	135.108	165.701	139.004	112.126	102.383	231.418	129.436	210.35	114.479	141.029	80.4844	148.323	182.785	178.918	240.605	139.351
ENSSSCG00000015782	IRF2	interferon regulatory factor 2	114.877	-0.360648	0.108999	-3.30873	0.000937195	0.0341585	149.523	142.682	165.982	101.073	116.828	75.5964	73.3573	69.5546	62.0595	103.053	147.676	74.2173	134.045	196.703	147.801	108.83	84.0081	156.699	142.577	68.539	61.0436	144.141	86.3402	108.309	206.447	154.449	117.596	102.383	53.4453	119.163	84.2387	128.148	92.5505	107.792	142.661	73.72	171.358	65.2047	140.423
ENSSSCG00000035875	OS9	OS9 endoplasmic reticulum lectin	161.453	-0.352568	0.127943	-2.75566	0.00585735	0.0931273	138.215	218.219	167.167	103.479	111.317	169.311	171.723	193.467	289.873	122.137	184.86	198.458	176.076	104.524	183.716	152.362	208.212	162.45	183.547	147.999	137.22	181.206	106.897	126.175	176.567	142.436	95.7177	168.793	200.954	123.273	247.79	124.73	94.7541	114.978	163.042	174.201	178.918	163.229	188.66
ENSSSCG00000009658	BNIP3L	BCL2 interacting protein 3 like	3825.24	-0.350573	0.128816	-2.72149	0.00649876	0.0982208	3804.68	5393.37	5256.88	4196.92	5220.9	2499.68	1746.82	2184.25	2483.17	5286.26	4729.87	1989.48	3295.46	2675.65	4387.08	4133.74	1591.73	4274.01	6402.85	1370.4	1194.45	2132.6	1905.65	3607.71	4374.78	6325.54	4413.95	6748.96	2974.76	4396.72	1891.68	4181.03	5730.42	4048.65	5513.98	2830.14	5886.65	1507.97	6595.6
ENSSSCG00000027196	-	-	112.519	-0.346943	0.117565	-2.95107	0.00316679	0.067582	82.9289	134.289	135.157	64.9752	119.033	119.955	119.206	116.899	116.263	70.6107	89.2429	126.856	130.637	116.869	85.6419	108.83	190.526	77.6309	176.992	112.976	130.551	112.567	95.5909	132.874	118.164	133.856	95.7177	94.0815	157.664	80.1272	120.693	75.1799	111.281	122.164	129.075	104.016	94.4989	97.807	86.8265
ENSSSCG00000031381	-	FKBP prolyl isomerase 11	106.074	-0.34491	0.122091	-2.82502	0.00472781	0.0838874	120.624	151.075	101.96	86.6337	137.769	108.084	95.4479	96.4413	103.694	198.473	149.801	119.99	141.997	95.4708	99.4551	94.3196	81.1945	90.5694	150.771	61.0073	68.2252	82.3663	70.9223	88.2107	104.582	104.682	68.3698	152.191	105.287	78.0726	87.6871	114.479	68.3111	90.5449	112.091	105.026	124.739	88.0263	138.279
ENSSSCG00000005164	HACD4	3-hydroxyacyl-CoA dehydratase 4	150.048	-0.339693	0.124989	-2.71778	0.00657218	0.0985925	183.449	174.575	264.385	176.877	188.468	70.5983	67.9389	94.1033	93.482	167.939	230.544	87.6222	148.812	97.9398	165.759	123.341	57.0773	172.513	226.156	71.9283	52.3231	136.591	71.9501	147.39	162.985	211.08	169.557	226.902	82.8402	228.054	91.6281	102.518	242.394	171.029	224.182	95.432	223.017	71.9425	276.559
ENSSSCG00000040920	PRKACB	protein kinase cAMP-activated catalytic subunit beta	101.172	-0.331663	0.122113	-2.71603	0.00660692	0.0986738	79.1594	68.823	73.5063	69.7882	76.0486	146.195	161.303	170.672	133.546	40.0763	74.3691	161.186	79.5181	102.878	80.1166	52.6013	145.909	41.6907	103.245	167.205	168.255	95.4077	79.1451	116.126	127.671	97.8176	101.187	55.342	141.096	86.2908	157.147	93.9749	48.4788	51.74	105.298	127.748	84.419	111.065	69.6756
ENSSSCG00000003680	RALBP1	ralA binding protein 1	216.35	-0.32713	0.115262	-2.83813	0.00453783	0.0824737	224.913	271.935	279.798	280.356	264.517	129.951	125.875	147.292	194.82	160.305	277.29	141.896	186.299	158.844	287.315	215.847	125.811	161.012	352.345	122.391	103.62	161.301	127.455	302.596	245.835	243.686	229.722	343.121	189.731	271.2	162.566	252.878	272.143	251.514	324.951	165.113	299.876	166.055	215.458
ENSSSCG00000001341	-	-	1765.67	-0.320178	0.116648	-2.74484	0.00605413	0.094504	2207.67	2791.53	2700.76	1792.84	1957.42	674.12	729.822	808.938	1119.43	2908.4	2670.91	963.191	1653.98	1831.23	2368.97	1906.34	723.113	1936.46	2073.1	589.737	540.672	1653.5	689.693	2200.8	1889.26	2035.29	1733.86	3337.13	1022.41	2029.89	925.148	1982.02	2298.34	1862.64	2870.21	887.669	3134.84	702.471	2657.32
ENSSSCG00000033176	SAP30L	SAP30 like	101.998	-0.319014	0.115691	-2.75747	0.00582499	0.0927588	129.419	83.9305	129.229	93.8531	98.0916	118.08	126.291	116.314	98.1954	53.4351	106.242	102.335	110.189	134.976	135.369	117.899	137.87	77.6309	86.8572	97.9129	132.86	81.6799	74.0058	121.708	108.656	96.1015	103.922	74.7118	105.287	78.0726	116.259	78.5972	92.5505	61.8005	78.1241	81.2939	128.518	93.8947	115.769
ENSSSCG00000004144	HECA	hdc homolog, cell cycle regulator	134.717	-0.317074	0.0951511	-3.33232	0.000861237	0.0328115	135.702	139.325	151.755	147.999	95.8873	201.799	181.726	186.453	160.255	95.4198	114.741	161.84	107.917	127.569	165.759	90.6919	172.84	86.2566	114.717	187.164	168.768	96.7804	117.176	128.408	154.835	135.572	98.4525	94.0815	184.386	90.3999	179.808	82.0145	85.9398	89.1077	124.546	175.211	117.179	188.659	116.841
ENSSSCG00000010092	PI4KA	phosphatidylinositol 4-kinase alpha	121.536	-0.308747	0.103533	-2.98213	0.00286255	0.0650907	86.6984	68.823	131.6	90.2434	99.1938	156.191	165.888	163.658	147.686	43.8931	133.864	141.896	127.229	122.631	127.082	117.899	166.81	67.5676	93.4124	152.895	178.001	118.058	105.869	123.942	162.985	126.991	125.8	88.5473	158.198	98.6181	157.147	68.3454	116.79	86.2333	120.017	136.331	125.998	140.407	96.4739
ENSSSCG00000031459	KMT5B	lysine methyltransferase 5B	112.815	-0.308442	0.105214	-2.93158	0.00337245	0.0697711	109.315	125.896	100.775	95.0564	150.995	120.579	84.611	110.469	105.265	87.7862	118.991	92.5265	124.957	114.4	109.124	107.016	87.6257	109.258	101.606	117.119	85.1532	113.94	76.0616	100.493	96.4326	101.25	117.596	102.383	128.803	137.654	104.929	128.148	124.502	70.4238	167.571	117.144	194.038	96.9376	162.934
ENSSSCG00000007206	RBCK1	RANBP2-type and C3HC4-type zinc finger containing 1	207.275	-0.302258	0.0864595	-3.49595	0.000472381	0.0220794	238.735	332.365	302.324	182.893	240.269	139.947	124.624	154.306	148.471	295.801	242.231	120.644	229.466	251.845	327.373	177.756	131.037	240.081	222.879	102.432	135.424	254.649	160.346	223.318	264.85	235.105	180.496	226.902	122.39	176.691	150.743	256.295	200.526	219.895	269.472	137.846	257.037	126.497	279.774
ENSSSCG00000030460	ARHGEF6	Rac/Cdc42 guanine nucleotide exchange factor 6	111.727	-0.301761	0.106282	-2.83924	0.00452217	0.0824737	85.4419	67.1444	99.5891	85.4304	85.9679	209.296	180.059	137.356	130.404	47.7099	78.6187	156.935	111.325	115.223	124.319	72.5535	162.791	79.0685	88.496	187.917	171.589	116.686	84.2844	115.009	112.731	113.262	62.9002	69.1776	156.595	100.673	140.89	52.9677	83.7362	76.1727	108.694	145.925	93.2389	141.059	106.121
ENSSSCG00000005240	DOCK8	dedicator of cytokinesis 8	195.729	-0.299272	0.0987831	-3.02958	0.00244893	0.0603033	148.267	189.683	156.497	147.999	138.871	314.881	285.927	261.853	302.442	93.5114	176.361	260.251	224.922	176.95	179.572	166.873	290.612	158.137	185.186	343.448	287.264	221.703	104.842	170.838	168.417	166.461	164.087	102.383	251.193	135.6	303.949	121.313	106.874	113.54	186.819	233.783	142.378	265.383	184.372
ENSSSCG00000005518	-	glycoprotein alpha-galactosyltransferase 1, pseudogene	146.689	-0.294661	0.096518	-3.05291	0.00226635	0.057481	173.397	161.146	221.704	123.934	159.812	126.202	140.879	133.849	126.476	125.954	155.113	126.202	113.597	176.95	156.089	114.272	127.419	113.571	204.852	130.676	124.652	157.869	113.064	165.256	161.626	202.5	194.17	171.56	127.734	141.763	131.038	131.565	103.568	149.471	175.496	122.193	185.218	98.8937	151.142
ENSSSCG00000015235	ETS1	ETS proto-oncogene 1, transcription factor	586.44	-0.293742	0.101542	-2.89281	0.00381809	0.0749264	410.875	379.366	509.802	333.299	487.152	834.685	953.229	932.85	853.907	251.908	383.532	965.806	518.003	533.319	442.023	502.433	953.03	230.018	506.394	1031.1	1099.3	409.086	529.347	620.825	603.043	489.088	494.997	262.875	882.916	408.854	942.882	517.716	416.477	352.119	486.86	664.995	601.013	694.43	381.608
ENSSSCG00000011720	MBNL1	muscleblind like splicing regulator 1	289.079	-0.290938	0.099983	-2.90988	0.00361573	0.072082	301.559	317.257	333.149	240.649	222.635	281.769	308.017	271.205	237.24	173.664	275.166	257.962	303.305	298.758	335.661	228.544	256.044	184.014	340.873	252.314	267.514	377.512	202.488	415.372	296.089	331.207	377.401	320.984	253.331	316.4	289.663	304.137	237.987	229.955	379.298	248.931	360.356	261.905	383.752
ENSSSCG00000026006	KLF13	Kruppel like factor 13	312.165	-0.287917	0.0868349	-3.31569	0.000914183	0.0336846	268.891	280.328	342.634	208.161	290.968	423.59	398.881	417.912	417.134	188.931	295.352	344.931	286.265	269.129	269.358	290.214	397.933	207.016	322.846	403.326	359.336	251.217	346.388	391.924	376.223	302.033	281.683	177.095	388.013	250.654	393.607	288.759	191.712	270.198	334.009	329.72	313.736	361.016	243.329
ENSSSCG00000003017	TGFB1	transforming growth factor beta 1	372.085	-0.271992	0.0839765	-3.23891	0.00119988	0.0403799	345.537	397.83	416.14	345.331	363.711	457.952	445.146	500.326	390.425	270.992	271.978	449.881	314.664	451.017	375.719	244.868	468.677	288.959	376.927	545.676	449.363	319.856	373.113	470.085	448.208	413.58	333.644	243.505	416.873	277.363	457.155	329.767	275.448	287.444	312.496	324.166	422.095	358.843	276.559
ENSSSCG00000017817	PRPF8	pre-mRNA processing factor 8	228.606	-0.251732	0.0844618	-2.98042	0.0028785	0.0651213	196.014	191.361	205.106	151.609	211.613	268.648	303.433	293.415	215.244	103.053	202.921	251.423	211.291	241.969	240.35	275.703	303.474	173.951	267.127	263.612	304.961	226.507	243.603	273.565	279.79	205.932	166.822	163.259	258.141	199.291	293.111	175.989	207.137	159.532	203.802	247.921	254.517	236.041	244.401
ENSSSCG00000010203	-	heterogeneous nuclear ribonucleoprotein F	441.214	0.211968	0.0734425	2.88617	0.0038996	0.0757519	511.395	444.831	367.531	451.217	401.184	372.359	364.286	362.386	380.998	517.175	422.841	346.566	402.134	444.433	392.295	464.342	334.827	697.241	473.617	358.512	295.471	407.713	469.732	446.637	347.701	507.965	445.771	558.955	395.495	476.654	392.129	563.85	468.262	629.503	475.538	443.835	454.855	484.036	433.061
ENSSSCG00000021845	ATXN2L	ataxin 2 like	207.864	0.269366	0.0866862	3.10736	0.00188764	0.0523561	168.371	156.111	142.27	211.771	210.511	204.923	224.24	184.115	201.104	145.038	189.11	179.822	186.299	192.588	161.615	192.267	198.967	268.833	175.353	220.304	178.514	186.011	284.717	236.717	180.641	166.461	199.64	249.039	254.934	265.036	200.991	285.342	299.687	229.955	208.331	260.545	200.338	213.219	192.948
ENSSSCG00000007249	NOL4L	COMM domain containing 7	107.641	0.279787	0.0935222	2.99166	0.00277463	0.0642045	144.497	83.9305	92.4756	109.495	79.355	95.5889	115.454	129.173	114.692	112.595	101.992	107.566	87.4699	105.347	96.6925	107.016	103.302	117.884	91.7736	96.4066	105.929	132.473	118.204	138.457	82.8505	135.572	95.7177	135.588	115.442	123.273	102.466	111.061	124.502	104.917	79.2563	90.3827	114.659	101.285	93.2581
ENSSSCG00000012322	KDM5C	lysine demethylase 5C	218.333	0.288124	0.0885898	3.25234	0.00114457	0.0386475	194.757	141.003	176.652	267.12	220.431	184.305	207.151	183.531	175.966	244.275	241.168	171.648	270.361	196.703	226.537	221.288	182.085	217.079	252.377	192.437	187.491	306.128	278.55	200.986	177.925	169.894	196.905	301.614	228.746	254.763	187.197	247.752	267.735	278.821	185.686	206.517	181.438	258.428	231.537
ENSSSCG00000013522	SAFB	scaffold attachment factor B	215.733	0.290189	0.104003	2.79019	0.00526775	0.0883442	160.832	156.111	154.126	196.129	182.957	197.425	200.482	200.481	256.094	259.542	201.859	195.188	289.673	222.216	187.86	270.262	192.937	247.269	247.461	227.459	194.16	194.247	293.968	215.502	191.507	169.894	243.396	282.244	179.576	178.745	183.256	261.421	246.801	290.319	164.174	221.665	221.757	269.513	165.078
ENSSSCG00000008164	MAP4K4	mitogen-activated protein kinase kinase kinase kinase 4	174.538	0.292885	0.0946988	3.09281	0.00198271	0.0538102	229.939	171.218	162.425	206.958	190.673	157.441	139.629	122.743	106.051	234.733	185.923	141.896	194.251	218.101	167.14	239.427	149.526	278.896	117.995	157.79	129.525	165.419	227.157	173.072	177.925	145.868	235.192	213.067	121.855	147.927	114.289	187.95	201.628	211.272	195.876	131.787	134.818	106.284	213.315
ENSSSCG00000017836	PAFAH1B1	platelet activating factor acetylhydrolase 1b regulatory subunit 1	98.2499	0.296477	0.0938005	3.16072	0.00157378	0.0470086	115.598	85.6091	75.8774	126.341	76.0486	97.4632	80.0262	91.1809	91.1253	87.7862	111.554	80.4294	81.79	97.1168	89.7859	117.899	88.8316	127.947	108.162	85.1089	94.3867	124.236	113.064	104.96	90.9997	77.2244	117.596	127.287	65.2032	92.4544	84.2387	136.691	100.263	104.917	96.2398	85.8383	81.899	86.7222	131.848
ENSSSCG00000030255	EIF4G1	eukaryotic translation initiation factor 4 gamma 1	209.861	0.297153	0.0913561	3.25268	0.00114321	0.0386475	152.036	181.29	136.342	179.284	195.081	199.3	237.578	236.72	193.249	276.717	135.989	245.865	227.194	177.773	164.377	273.89	202.986	199.828	196.658	209.383	216.474	193.561	232.296	209.919	218.671	152.733	216.048	254.573	266.158	207.509	238.923	232.374	215.951	283.133	184.554	255.495	201.598	234.085	148.999
ENSSSCG00000000068	EP300	E1A binding protein p300	310.437	0.2973	0.105082	2.82922	0.00466615	0.0832689	354.332	266.899	286.912	389.851	231.452	252.405	275.09	292.246	219.958	236.641	386.719	184.726	341.928	292.996	243.112	382.72	238.358	393.905	326.124	268.131	243.405	411.832	427.589	288.081	240.402	279.724	344.584	445.503	244.245	351.327	247.297	283.633	293.077	482.906	304.571	315.077	280.977	362.755	395.543
ENSSSCG00000008433	STPG4	sperm-tail PG-rich repeat containing 4	157.636	0.306901	0.113138	2.71263	0.00667517	0.0990743	124.393	90.6449	97.218	129.95	114.624	183.056	182.143	191.129	194.82	188.931	67.9946	214.805	120.413	101.232	100.836	143.293	209.819	165.325	170.437	207.123	226.477	120.118	171.652	128.408	213.238	157.881	147.679	168.793	166.749	160.254	259.613	157.194	164.167	132.224	126.81	172.182	119.699	216.045	140.423
ENSSSCG00000011390	IP6K1	inositol hexakisphosphate kinase 1	181.661	0.307946	0.110927	2.77612	0.00550113	0.0900843	164.601	194.719	168.353	144.389	176.345	166.812	113.787	144.954	171.253	314.885	163.612	124.24	178.348	113.577	139.513	217.661	129.831	181.139	188.464	132.559	114.136	142.768	210.711	154.09	148.044	188.771	226.988	345.888	180.111	205.454	152.713	295.594	211.544	225.644	185.686	195.408	180.178	213.002	179.013
ENSSSCG00000010357	WAPL	WAPL cohesin release factor	100.558	0.327743	0.110634	2.96242	0.00305231	0.0670471	71.6204	102.395	81.8054	131.154	76.0486	74.3469	89.6127	70.1391	69.1296	122.137	110.491	87.6222	89.7418	109.462	73.21	145.107	76.371	104.945	114.717	99.4193	70.277	109.822	161.374	97.1435	90.9997	109.83	117.596	121.752	77.4957	100.673	65.519	129.856	106.874	155.22	88.3142	99.4715	100.799	107.805	111.481
ENSSSCG00000012793	-	host cell factor C1	121.243	0.328182	0.10452	3.13991	0.00168998	0.0491701	135.702	95.6807	92.4756	93.8531	78.2529	128.701	129.209	118.068	88.7687	74.4274	87.1181	109.201	132.909	109.462	110.506	152.362	141.085	148.074	99.9677	142.35	145.94	136.591	192.21	113.892	110.015	116.695	139.474	94.0815	120.786	110.945	110.348	104.227	138.826	186.839	122.281	147.945	142.378	127.149	99.6897
ENSSSCG00000010083	PPIL2	peptidylprolyl isomerase like 2	78.8228	0.335328	0.114325	2.93311	0.00335587	0.0695706	74.1334	85.6091	67.5783	98.6661	83.7636	66.225	61.27	85.9204	81.6986	85.8778	78.6187	71.6017	61.3425	74.0721	66.3034	87.0642	52.6558	99.195	75.3855	81.343	69.5076	71.3842	118.204	64.7623	71.9849	90.9532	150.414	69.1776	83.3746	88.3453	70.4452	93.9749	73.8201	76.1727	72.4629	86.8482	52.9194	64.5526	66.4598
ENSSSCG00000000808	SLC38A2	solute carrier family 38 member 2	341.885	0.339725	0.108505	3.13095	0.00174239	0.0495527	378.206	280.328	305.881	381.429	203.898	306.759	305.933	286.401	199.533	349.236	343.16	253.712	352.151	313.572	331.517	504.247	239.162	401.093	345.79	256.457	226.22	400.849	453.286	362.892	323.253	351.8	470.384	406.764	253.331	433.509	220.203	398.112	380.118	416.794	246.827	374.659	352.796	479.472	443.78
ENSSSCG00000031083	SZRD1	SUZ RNA binding domain containing 1	101.382	0.345763	0.102065	3.38767	0.000704889	0.0281287	108.059	60.4299	105.517	117.918	105.807	83.0936	85.8614	85.9204	98.981	164.122	100.929	110.182	81.79	102.055	85.6419	139.666	101.694	103.508	121.272	77.9537	90.5394	91.9757	116.148	104.96	92.3579	54.9151	112.126	127.287	97.2704	123.273	110.84	124.73	122.299	99.1683	79.2563	93.4123	94.4989	85.2007	93.2581
ENSSSCG00000032996	SLC7A5	solute carrier family 7 member 5	410.935	0.349011	0.126697	2.7547	0.00587466	0.093237	307.842	411.259	452.893	421.136	341.667	289.266	280.092	296.922	312.654	540.076	437.715	261.559	389.638	236.208	332.898	489.736	255.24	589.42	508.032	203.358	171.076	330.838	518.041	401.973	347.701	406.715	538.754	805.227	358.083	495.145	224.144	762.051	626.92	633.815	271.736	508.466	519.114	204.525	544.542
ENSSSCG00000040157	AP3D1	adaptor related protein complex 3 subunit delta 1	117.273	0.350819	0.0856803	4.09451	4.23061e-05	0.00449603	131.932	105.752	75.8774	117.918	94.7852	144.32	137.545	150.215	144.544	131.679	96.6798	129.145	105.645	102.878	117.412	139.666	122.194	133.698	117.995	155.907	137.733	118.058	156.235	88.2107	86.9251	85.8049	103.922	102.383	123.993	131.491	117.245	105.935	85.9398	132.224	96.2398	125.728	112.139	119.759	87.8984
ENSSSCG00000000288	HNRNPA1	heterogeneous nuclear ribonucleoprotein A1	347.787	0.351451	0.119292	2.94614	0.00321763	0.0681032	262.608	241.72	253.715	263.511	278.845	321.129	381.792	359.463	383.355	358.778	175.299	329.564	413.494	232.916	192.004	409.927	376.228	414.032	337.596	301.647	336.766	348.684	477.954	475.668	289.298	392.986	443.036	412.298	348.998	359.545	439.913	440.828	383.424	298.942	300.042	423.132	313.736	532.505	258.336
ENSSSCG00000027294	CDV3	CDV3 homolog	92.6764	0.35255	0.109612	3.21636	0.00129828	0.0417434	135.702	83.9305	81.8054	102.276	83.7636	86.8422	56.6852	61.9562	89.5542	99.2366	66.9322	89.9109	102.237	73.2491	87.0232	136.038	76.371	129.385	106.523	67.7859	62.839	126.295	89.4237	85.9775	80.1341	82.3727	114.861	124.52	92.9948	106.836	66.9969	119.604	92.5505	99.1683	138.132	79.7792	83.159	75.42	76.1072
ENSSSCG00000002723	AARS1	alanyl-tRNA synthetase 1	168.322	0.355543	0.118458	3.00143	0.00268717	0.0629459	147.01	139.325	147.013	146.796	173.038	120.579	165.888	147.877	112.336	211.832	96.6798	140.261	145.404	226.332	160.233	181.384	135.458	209.891	145.854	110.34	124.139	256.022	196.321	221.085	158.91	157.881	172.292	260.108	153.388	158.2	107.392	280.216	224.766	241.453	191.347	200.963	127.258	110.631	158.646
ENSSSCG00000035570	HNRNPL	heterogeneous nuclear ribonucleoprotein L	177.803	0.35627	0.0925218	3.85066	0.0001178	0.00887544	125.65	159.468	135.157	151.609	175.242	189.928	193.397	167.749	201.104	206.107	158.3	206.632	148.812	157.198	142.276	174.128	196.153	202.703	137.66	207.5	182.105	158.555	203.516	155.206	142.612	187.055	284.418	265.642	187.058	209.563	186.705	205.036	160.862	188.276	131.339	188.844	167.578	181.704	111.481
ENSSSCG00000004029	QKI	QKI, KH domain containing RNA binding	111.719	0.361021	0.119673	3.01673	0.00255518	0.0620525	126.906	88.9663	88.9189	128.747	149.893	156.816	109.202	109.885	104.48	99.2366	113.678	93.1804	86.3339	83.9484	129.844	141.479	91.6453	152.387	131.105	128.417	89.7699	132.473	190.154	68.1121	124.955	123.559	95.7177	118.985	102.08	117.109	93.5986	99.1008	127.808	117.852	90.5787	89.8778	76.8591	100.85	82.5388
ENSSSCG00000008242	KCMF1	potassium channel modulatory factor 1	48.6287	0.361441	0.123534	2.92585	0.00343519	0.0701934	69.1074	58.7513	52.1657	62.5688	55.1077	44.983	42.5139	47.3439	51.0616	83.9694	70.1194	36.6182	44.3029	46.9124	33.1517	45.3459	47.0285	63.2548	65.5526	36.1525	35.908	67.9522	64.7551	23.4484	36.6715	41.1863	49.2262	47.0407	42.7562	57.5272	33.0058	34.1727	48.4788	68.9866	38.4959	34.8403	44.0995	25.8645	46.0931
ENSSSCG00000003046	RABAC1	Rab acceptor 1	68.3959	0.363754	0.11935	3.04778	0.0023054	0.0578204	71.6204	48.6797	60.4648	91.4466	82.6615	51.2306	51.6836	59.6183	74.6285	122.137	84.9932	68.9862	68.1583	61.7268	60.7781	85.2504	60.6949	90.5694	83.5795	56.1116	45.6544	70.0114	74.0058	36.8475	58.4028	58.3473	68.3698	113.451	71.6167	73.9635	60.1001	73.4713	91.4487	47.4283	57.7439	60.5918	54.1794	58.9015	57.8843
ENSSSCG00000003637	MAP7D1	MAP7 domain containing 1	94.4674	0.364228	0.133578	2.72671	0.00639691	0.0972171	99.2633	78.8946	88.9189	96.2596	69.4357	114.332	97.9487	88.8429	111.55	124.046	84.9932	89.9109	63.6144	102.055	93.9298	65.2982	102.9	152.387	106.523	99.4193	104.903	132.473	94.563	63.6457	62.4774	42.9024	106.657	135.588	119.183	82.1817	123.649	93.9749	65.0057	99.1683	91.7109	79.2742	61.7393	90.6345	103.977
ENSSSCG00000025164	TSC22D4	TSC22 domain family protein 4	157.438	0.368951	0.125443	2.94118	0.00326962	0.068628	134.445	100.717	93.6612	180.487	117.93	214.919	142.13	159.567	183.036	173.664	202.921	179.822	180.62	120.984	122.938	134.224	149.125	253.019	147.493	176.243	134.398	201.111	179.875	113.892	90.9997	109.83	134.005	207.533	129.338	110.945	154.684	208.453	171.88	185.402	143.794	180.765	157.498	200.178	157.574
ENSSSCG00000017136	TBCD	tubulin folding cofactor D	52.6739	0.371415	0.120598	3.07977	0.00207159	0.0548945	62.8249	38.608	41.4955	26.4714	35.2689	59.9773	65.0213	63.7097	76.9852	45.8015	31.8725	72.9095	48.8468	46.0893	44.2023	54.4151	69.1359	54.6292	37.6927	72.6815	79.254	61.0884	62.6994	39.0807	52.97	37.7542	27.3479	58.1091	61.4621	53.4181	73.401	42.7159	63.9039	51.74	33.967	60.0868	49.1394	59.9883	37.5176
ENSSSCG00000009746	RAN	RAN, member RAS oncogene family	104.502	0.371959	0.112593	3.30357	0.000954637	0.0345448	106.802	94.0021	74.6919	77.0077	105.807	107.459	112.12	88.8429	117.834	167.939	89.2429	109.855	84.0619	119.338	70.4474	107.016	117.37	110.696	77.0243	133.312	140.041	96.0941	141.845	78.1614	85.5669	96.1015	101.187	102.383	128.803	100.673	102.958	112.77	158.658	93.4194	89.4464	94.4222	89.4589	109.109	83.6107
ENSSSCG00000017584	PPP1R9B	protein phosphatase 1 regulatory subunit 9B	151.189	0.3727	0.116953	3.18676	0.00143878	0.0446953	113.085	132.61	111.445	163.641	130.054	213.669	215.07	187.038	205.818	148.855	103.054	208.92	174.94	88.0635	85.6419	146.921	268.906	97.7574	104.884	210.889	199.546	110.508	185.015	84.8609	104.582	104.682	150.414	110.684	207.902	158.2	252.716	162.32	152.047	143.722	120.017	164.103	118.439	174.966	80.3949
ENSSSCG00000035505	YTHDC1	YTH domain containing 1	130.138	0.373186	0.0931102	4.008	6.12348e-05	0.00583232	95.4938	85.6091	116.187	137.17	125.645	132.45	132.96	141.447	108.408	145.038	108.366	122.606	114.733	139.091	87.0232	177.756	119.782	142.323	132.744	141.221	138.759	129.727	138.761	102.726	84.2087	121.843	185.966	190.93	114.373	147.927	124.141	165.738	138.826	136.536	114.356	124.718	119.699	174.314	115.769
ENSSSCG00000022659	CLTC	clathrin heavy chain	149.487	0.374488	0.0935427	4.0034	6.24397e-05	0.00583695	150.78	141.003	123.301	181.69	134.463	134.324	159.219	119.821	108.408	110.687	156.175	118.682	139.725	162.959	131.225	166.873	128.625	227.142	137.66	156.284	149.018	203.857	186.042	119.475	129.029	101.25	142.209	141.122	130.406	201.345	122.171	205.036	198.323	172.467	123.413	158.548	141.118	148.884	167.221
ENSSSCG00000017752	WSB1	WD repeat and SOCS box containing 1	131.651	0.377466	0.112251	3.36268	0.000771895	0.0302906	103.033	115.824	94.8468	173.267	119.033	100.587	134.211	129.757	107.622	137.405	122.178	115.74	139.725	100.409	99.4551	195.894	130.635	156.699	104.884	91.1343	123.113	118.745	207.628	148.507	103.224	159.597	114.861	204.766	102.615	119.163	112.318	175.989	152.047	172.467	142.661	149.965	102.059	124.758	127.56
ENSSSCG00000005601	HSPA5	heat shock protein family A (Hsp70) member 5	142.311	0.37755	0.123346	3.0609	0.00220673	0.0568345	129.419	120.86	119.744	162.438	135.565	103.711	115.871	97.0258	117.049	227.099	103.054	135.684	138.589	128.392	113.268	143.293	112.145	153.824	114.717	107.328	119.266	144.827	193.237	99.3766	130.388	151.017	155.883	188.163	117.58	135.6	157.147	194.784	167.472	178.215	132.471	137.846	125.998	308.853	132.92
ENSSSCG00000003195	PNKP	polynucleotide kinase 3'-phosphatase	173.15	0.390946	0.126097	3.10037	0.0019328	0.0528821	185.962	122.538	135.157	162.438	166.425	172.435	143.38	170.087	140.616	194.656	206.109	134.703	256.73	142.383	133.988	214.033	141.889	286.084	149.132	152.518	153.122	285.537	192.21	138.457	168.417	149.301	237.927	132.821	137.354	156.145	143.354	292.177	152.047	173.904	167.571	195.913	115.919	186.485	162.934
ENSSSCG00000001958	BAZ1A	bromodomain adjacent to zinc finger domain 1A	145.91	0.391966	0.101194	3.8734	0.000107326	0.008452	177.166	162.825	113.816	180.487	149.893	107.459	85.8614	94.6878	65.9873	185.114	144.489	76.506	135.181	143.206	183.716	179.57	74.7632	231.455	163.881	94.5236	79.767	178.46	261.076	161.906	141.253	113.262	155.883	152.191	88.7192	226	89.6576	211.871	200.526	189.713	141.529	113.105	124.739	126.932	183.3
ENSSSCG00000014337	ETF1	eukaryotic translation termination factor 1	57.6916	0.39219	0.114068	3.43821	0.000585582	0.0254829	42.7209	43.6438	41.4955	52.9428	73.8443	48.7316	60.0196	50.2664	48.7049	78.2442	46.7463	46.7537	49.9828	51.0275	44.2023	77.995	53.8617	63.2548	50.8032	47.8267	53.349	69.325	77.0894	44.6637	47.5372	54.9151	54.6958	44.2736	53.4453	86.2908	46.3067	107.644	78.2272	73.2983	56.6117	50.4931	65.5192	48.9035	64.3159
ENSSSCG00000017690	DHRS11	mitochondrial rRNA methyltransferase 1	127.941	0.392384	0.12923	3.03632	0.00239487	0.0594069	198.527	122.538	122.115	168.454	162.017	69.3488	64.6045	58.4493	145.329	190.84	154.05	70.6209	99.9656	139.914	179.572	143.293	54.2636	172.513	91.7736	68.539	55.4009	131.1	161.374	84.8609	95.0744	133.856	169.557	149.424	87.1158	117.109	55.1739	258.004	250.107	173.904	140.397	109.57	133.558	68.0302	139.351
ENSSSCG00000035120	ALKBH5	alkB homolog 5, RNA demethylase	43.8564	0.393137	0.140151	2.8051	0.00503016	0.086618	49.0034	26.8577	55.7225	31.2844	39.6775	50.6059	41.2635	36.2386	58.1317	34.3511	27.6228	39.5608	49.9828	46.9124	34.533	54.4151	47.4304	60.3796	40.9704	45.9438	37.1904	46.6743	53.4487	44.6637	29.8805	44.6185	54.6958	30.4381	59.8587	47.2545	39.9025	76.8886	44.0717	57.4888	27.1736	42.9192	32.7596	40.6442	28.9422
ENSSSCG00000006740	ATP1A1	ATPase Na+/K+ transporting subunit alpha 1	139.512	0.394898	0.10262	3.84818	0.000118998	0.00889929	138.215	68.823	107.888	151.609	134.463	124.328	159.219	128.588	147.686	162.214	164.674	130.779	123.821	134.976	147.801	163.245	131.439	103.508	113.078	136.701	120.805	187.383	174.736	119.475	100.507	97.8176	196.905	110.684	167.818	195.182	145.817	194.784	154.251	145.159	124.546	124.718	124.739	158.23	124.344
ENSSSCG00000001436	RNF5	ring finger protein 5	34.463	0.395608	0.13881	2.84999	0.00437203	0.0809909	38.9514	21.8219	29.6396	34.8941	31.9624	26.2401	29.1762	27.4712	25.138	24.8091	29.7476	28.4445	28.3993	18.1065	26.2451	43.5321	27.7347	50.3163	32.7763	25.2314	18.7234	27.4554	41.1144	34.6143	28.5223	20.5932	27.3479	74.7118	42.2218	51.3636	37.9321	37.59	51.7842	47.4283	44.1571	51.503	35.2796	39.9922	31.086
ENSSSCG00000039267	ATP6V0B	ATPase H+ transporting V0 subunit b	137.776	0.397238	0.121698	3.26412	0.00109805	0.0377071	189.731	181.29	87.7333	206.958	197.285	99.3375	69.6061	98.1948	156.327	248.091	143.426	59.5046	124.957	135.799	124.319	146.921	82.4003	250.144	103.245	74.941	57.7093	128.354	126.427	79.278	78.7759	132.14	98.4525	229.669	122.39	154.091	81.7756	246.043	212.646	188.276	124.546	121.184	162.538	99.7631	148.999
ENSSSCG00000005944	NDRG1	N-myc downstream regulated 1	82.4693	0.397624	0.140442	2.83123	0.00463699	0.0832689	75.3899	50.3583	68.7639	114.308	88.1723	98.0879	83.7774	77.7375	104.48	53.4351	47.8087	84.6797	82.926	75.7182	73.21	76.1812	103.302	97.7574	108.162	95.2768	82.8448	63.8339	107.925	42.4305	65.1938	94.3854	60.1654	102.383	72.6856	86.2908	85.7166	141.817	83.7362	106.354	60.0084	101.491	61.7393	88.461	49.3089
ENSSSCG00000017525	NFE2L1	nuclear factor, erythroid 2 like 1	144.734	0.398279	0.132475	3.00644	0.00264324	0.0622816	242.504	149.396	158.868	205.755	187.366	79.9698	68.3557	78.322	79.3419	208.015	169.986	65.7167	169.26	193.411	178.19	206.778	73.1554	327.775	109.801	63.2668	60.7871	327.406	127.455	122.825	124.955	106.398	177.761	138.355	77.4957	168.473	82.2682	136.691	150.945	201.211	166.438	83.3137	108.359	83.8967	184.372
ENSSSCG00000003199	AP2A1	adaptor related protein complex 2 subunit alpha 1	87.0056	0.399	0.143451	2.78144	0.00541188	0.0892987	61.5684	94.0021	37.9387	77.0077	104.705	89.3412	70.8565	98.7793	82.4841	146.946	90.3053	76.179	94.2857	68.311	71.8287	110.644	88.4296	129.385	78.6631	79.0835	64.3779	109.822	121.287	72.5784	73.3431	54.9151	68.3698	66.4105	88.1847	76.0181	100.003	121.313	74.9218	145.159	65.6695	79.7792	74.3391	102.371	83.6107
ENSSSCG00000001520	LEMD2	LEM domain containing 2	91.6725	0.401613	0.136532	2.94154	0.00326589	0.068628	64.0814	75.5374	46.2378	78.2109	60.6184	116.831	115.871	98.7793	142.973	167.939	91.3677	117.375	85.1979	70.78	59.3968	87.0642	131.037	84.819	65.5526	120.885	126.704	97.4668	101.758	54.713	73.3431	82.3727	54.6958	71.9447	132.01	71.909	142.368	133.274	68.3111	60.3633	67.934	122.698	60.4793	123.019	49.3089
ENSSSCG00000013523	SAFB2	scaffold attachment factor B2	155.041	0.403122	0.113897	3.53935	0.000401107	0.0200474	149.523	94.0021	122.115	168.454	149.893	222.416	162.136	143.201	136.688	158.397	125.365	144.511	191.979	101.232	99.4551	186.825	152.742	191.202	122.911	187.541	150.814	133.159	222.018	146.273	149.403	126.991	139.474	149.424	151.785	189.018	140.398	146.943	185.101	217.02	103.033	184.3	147.418	214.089	139.351
ENSSSCG00000036488	KLF3	Kruppel like factor 3	144.955	0.404891	0.134974	2.99977	0.00270187	0.0631437	116.854	112.467	81.8054	164.845	141.076	142.446	122.54	156.644	147.686	158.397	97.7422	145.165	118.141	102.878	77.354	170.501	113.351	129.385	204.852	144.986	121.574	109.822	185.015	137.341	84.2087	135.572	125.8	221.368	139.492	170.527	123.156	310.972	200.526	143.722	126.81	169.657	141.118	210.611	146.855
ENSSSCG00000032962	ZNF664	zinc finger protein 664	55.4922	0.408556	0.12865	3.17572	0.00149467	0.0455189	66.5944	58.7513	68.7639	60.1623	34.1667	54.9792	42.0971	47.3439	40.8493	61.0687	31.8725	42.5033	53.3907	46.0893	41.4396	77.995	55.4695	73.3181	63.9138	50.8394	47.9628	59.0292	52.4208	51.3632	46.179	60.0634	112.126	94.0815	47.0319	63.6908	51.2329	44.4245	51.7842	67.5494	55.4794	52.5129	56.6993	36.0799	42.8773
ENSSSCG00000014016	SQSTM1	sequestosome 1	293.684	0.408738	0.138964	2.94133	0.00326806	0.068628	272.66	322.293	243.045	322.47	285.458	134.949	165.054	144.37	200.319	625.954	241.168	95.142	370.327	232.916	251.4	346.443	125.811	457.16	345.79	114.859	98.7469	285.537	343.305	293.664	207.805	429.024	322.705	702.844	194.006	425.29	141.876	449.371	409.867	462.785	295.513	329.215	371.696	163.446	229.393
ENSSSCG00000023318	MARS1	methionyl-tRNA synthetase 1	68.4531	0.410794	0.132401	3.10264	0.00191805	0.0526213	49.0034	62.1085	50.9802	60.1623	78.2529	67.4745	87.1118	70.7236	58.1317	68.7023	36.1221	72.2556	65.8864	72.4261	59.3968	105.203	85.214	70.4429	47.5256	61.3839	67.4557	82.3663	100.73	46.8968	48.8954	78.9405	49.2262	102.383	73.22	69.8545	55.1739	97.3922	94.7541	63.2377	46.4216	79.2742	56.6993	49.9902	78.2511
ENSSSCG00000014149	MEF2C	myocyte enhancer factor 2C	49.9319	0.418649	0.151287	2.76725	0.0056531	0.091027	46.4904	40.2866	24.8973	48.1298	33.0646	56.2288	69.1893	72.4771	60.4884	24.8091	39.3094	77.4868	49.9828	33.744	49.7276	77.995	66.3222	46.0035	22.9434	54.6053	60.2741	43.9287	53.4487	36.8475	46.179	41.1863	38.2871	41.5065	65.2032	55.4727	83.2535	30.7554	67.2093	60.3633	28.3058	77.2545	23.9397	51.5117	48.2369
ENSSSCG00000017069	LARP1	La ribonucleoprotein 1, translational regulator	283.134	0.420102	0.128611	3.26647	0.00108898	0.0375235	267.634	246.756	243.045	244.259	212.716	214.294	277.174	234.966	267.092	349.236	168.924	244.231	253.322	172.835	189.241	337.374	219.064	276.021	275.321	204.864	215.191	200.425	506.734	395.273	241.761	319.194	330.91	531.284	218.591	318.454	255.179	471.583	354.777	333.435	258.149	328.71	342.716	291.03	230.465
ENSSSCG00000003648	RRAGC	Ras related GTP binding C	51.2691	0.424295	0.123727	3.42928	0.00060518	0.0261107	77.9029	52.0369	47.4234	69.7882	52.9034	59.3526	55.4348	49.6819	45.5627	59.1603	46.7463	50.677	57.9346	58.4347	29.0077	63.4843	47.0285	67.5676	67.1914	56.8648	51.2971	65.2067	65.783	36.8475	59.761	24.0254	46.4914	55.342	49.1697	41.0909	49.755	34.1727	52.886	61.8005	43.0249	39.8896	27.7197	47.8167	33.2299
ENSSSCG00000036595	-	TNF receptor superfamily member 6b	71.1406	0.424442	0.135547	3.13133	0.00174016	0.0495527	104.289	30.215	40.3099	61.3655	70.5378	68.724	70.0229	80.66	99.7665	114.504	58.4329	73.8904	60.2065	59.2577	60.7781	65.2982	80.7925	71.8805	49.1644	88.1216	68.4816	74.1297	78.1173	56.9462	76.0595	48.0507	73.8394	35.9723	82.8402	86.2908	88.6723	123.022	70.5147	47.4283	64.5373	84.3235	56.6993	82.8099	67.5317
ENSSSCG00000038436	HYPK	huntingtin interacting protein K	97.1446	0.436706	0.146044	2.99024	0.00278757	0.0642045	109.315	149.396	156.497	123.934	96.9895	94.9641	42.9307	56.1113	75.4141	253.817	111.554	64.4089	54.5267	81.4793	95.3111	146.921	47.8324	116.446	73.7466	48.2033	44.885	89.9166	125.399	91.5605	61.1192	152.733	139.474	141.122	65.2032	125.327	46.7993	140.108	81.5326	127.913	69.0662	67.1559	98.2788	55.8587	65.3879
ENSSSCG00000000458	MON2	MON2 homolog, regulator of endosome-to-Golgi trafficking	37.2507	0.439266	0.145619	3.01653	0.00255684	0.0620525	31.4124	38.608	26.0829	33.6909	25.3495	35.6115	35.8451	29.8091	25.9236	38.1679	35.0597	31.3871	36.3511	26.3368	33.1517	45.3459	31.7543	47.4411	19.6658	27.8675	26.1615	48.047	58.588	56.9462	32.5969	29.1737	51.961	47.0407	28.326	41.0909	33.4984	56.385	40.7663	56.0516	36.2315	48.4734	22.6797	36.732	47.165
ENSSSCG00000026904	NFKBIB	NFKB inhibitor beta	113.169	0.440496	0.147821	2.97992	0.00288324	0.0651213	148.267	115.824	133.971	128.747	131.156	39.9849	53.7676	54.3578	54.9894	293.893	125.365	51.9848	90.8778	79.8333	87.0232	136.038	59.891	208.453	106.523	28.2441	32.3172	102.272	117.176	109.426	71.9849	123.559	114.861	168.793	90.857	139.709	43.3509	232.374	235.783	132.224	79.2563	127.243	133.558	50.6423	179.013
ENSSSCG00000005300	VCP	valosin containing protein	165.548	0.44147	0.0999721	4.41593	1.00576e-05	0.00175072	138.215	152.753	116.187	190.113	188.468	131.2	151.716	152.553	126.476	257.633	128.552	152.685	137.453	111.931	132.607	246.682	168.418	145.199	140.938	131.429	144.401	175.715	166.513	146.273	167.059	156.165	188.701	224.135	170.49	211.618	147.295	264.838	174.083	217.02	164.174	215.606	129.778	153.014	138.279
ENSSSCG00000007907	USP7	ubiquitin specific peptidase 7	407.276	0.444109	0.160893	2.76028	0.00577514	0.092256	273.917	392.795	233.56	328.486	316.318	285.517	204.233	230.29	247.452	511.45	271.978	221.998	450.981	344.024	270.739	542.338	214.643	451.409	532.615	251.184	183.9	308.874	879.847	549.363	292.014	482.224	464.914	691.776	307.845	684.163	176.852	883.364	563.016	599.321	384.959	590.265	475.014	401.009	389.111
ENSSSCG00000025525	-	glutamine amidotransferase like class 1 domain containing 3A	45.8114	0.45109	0.152432	2.95929	0.0030835	0.0670471	70.3639	30.215	32.0108	50.5363	31.9624	56.8535	70.0229	56.6958	61.2739	62.9771	32.9349	68.9862	32.9432	25.5137	34.533	48.9736	54.6656	23.0018	26.221	55.735	60.2741	26.0827	44.1979	26.7982	47.5372	37.7542	46.4914	44.2736	61.4621	51.3636	53.2034	41.0072	67.2093	30.1816	41.8926	57.0572	46.6194	52.1637	24.6544
ENSSSCG00000014901	PCF11	PCF11 cleavage and polyadenylation factor subunit	156.343	0.451951	0.124452	3.63154	0.000281739	0.0157342	189.731	159.468	98.4036	187.706	111.317	191.803	172.14	143.201	115.478	89.6946	118.991	135.684	144.268	146.498	147.801	190.453	118.576	274.583	152.41	155.154	149.018	170.224	202.488	150.74	103.224	101.25	191.435	190.93	124.528	160.254	133.501	196.493	137.724	205.523	148.323	200.963	131.038	193.44	162.934
ENSSSCG00000009432	DGKD	diacylglycerol kinase delta	204.877	0.459971	0.130971	3.51201	0.000444734	0.0209815	203.553	231.648	175.467	220.194	135.565	303.635	222.573	217.431	317.368	190.84	142.364	208.593	152.22	148.144	146.42	181.384	213.035	225.705	217.962	204.111	176.975	168.851	282.661	174.188	139.895	224.809	147.679	262.875	238.366	244.491	255.672	280.216	191.712	300.379	160.777	209.042	123.479	271.686	78.2511
ENSSSCG00000009777	KMT5A	lysine methyltransferase 5A	39.5009	0.460337	0.144949	3.17585	0.00149399	0.0455189	64.0814	65.4658	30.8252	46.9266	60.6184	27.4896	21.257	32.7316	32.2081	45.8015	39.3094	27.1367	28.3993	35.39	34.533	74.3674	25.725	54.6292	36.0539	19.5826	25.905	39.8104	46.2537	31.2646	31.2387	27.4576	30.0827	38.7394	32.0672	57.5272	22.1681	75.1799	59.4968	47.4283	37.3637	46.4537	30.2396	27.1686	32.158
ENSSSCG00000013448	MKNK2	MAPK interacting serine/threonine kinase 2	100.854	0.460604	0.125456	3.67143	0.000241195	0.0145967	91.7243	77.216	62.836	83.0239	77.1507	103.711	95.8647	91.1809	113.121	200.382	84.9932	121.298	102.237	65.0189	78.7353	110.644	95.6648	142.323	117.995	123.144	108.237	93.3485	129.51	88.2107	77.4177	65.2117	103.922	66.4105	108.494	125.327	119.215	102.518	124.502	79.0472	81.5208	122.193	80.639	141.059	78.2511
ENSSSCG00000013178	ZDHHC5	zinc finger DHHC-type containing 5	91.8377	0.462129	0.135214	3.41775	0.000631403	0.0264508	101.776	109.11	71.1351	80.6174	102.5	59.3526	64.6045	61.9562	84.0553	127.863	69.057	68.3323	124.957	102.878	91.1672	112.458	67.1261	159.575	50.8032	66.6561	56.6833	121.49	116.148	74.8116	88.2833	54.9151	128.535	130.054	72.6856	69.8545	64.5338	138.399	124.502	125.038	93.9754	107.55	59.2193	94.3294	84.6826
ENSSSCG00000024240	CCDC9	coiled-coil domain containing 9	174.709	0.46528	0.146153	3.18352	0.00145494	0.0450584	139.471	240.041	132.786	221.397	219.328	123.703	99.1991	119.821	116.263	391.221	149.801	85.6605	195.387	144.029	128.463	281.145	110.135	209.891	260.571	98.6661	112.854	153.75	279.578	182.004	110.015	187.055	202.375	243.505	91.3914	201.345	101.973	251.169	211.544	277.384	153.984	161.578	158.758	150.623	115.769
ENSSSCG00000010772	ADAM8	ADAM metallopeptidase domain 8	165.45	0.469626	0.165917	2.83049	0.00464774	0.0832689	212.348	174.575	128.043	190.113	195.081	185.555	124.624	126.835	248.238	381.679	166.799	67.0245	193.115	148.967	106.362	174.128	68.332	365.153	149.132	79.8367	43.859	168.165	185.015	96.0269	107.298	202.5	232.457	174.327	111.166	211.618	114.781	199.91	190.61	215.583	113.223	128.253	108.359	115.847	247.616
ENSSSCG00000014338	HSPA9	heat shock protein family A (Hsp70) member 9	123.717	0.470788	0.112843	4.17205	3.01872e-05	0.00350311	121.88	78.8946	98.4036	115.512	112.42	112.458	92.5303	98.1948	83.2697	158.397	92.4301	101.354	113.597	125.1	81.4979	130.596	117.37	136.573	122.911	143.103	112.597	134.532	162.402	126.175	112.731	139.004	161.353	135.588	99.9427	139.709	86.7018	259.713	137.724	194.025	107.562	149.46	128.518	99.9805	100.762
ENSSSCG00000010858	SDE2	SDE2 telomere maintenance homolog	178.742	0.477143	0.175294	2.72196	0.00648958	0.0982208	150.78	166.182	138.713	93.8531	149.893	93.0898	100.45	98.7793	161.04	427.481	123.24	73.8904	205.611	143.206	96.6925	224.916	95.6648	286.084	276.96	78.3303	67.1992	188.07	337.138	145.157	156.194	229.957	216.048	304.381	121.321	215.727	96.0617	314.389	250.107	208.397	192.48	178.746	223.017	171.271	170.437
ENSSSCG00000034455	RNF166	ring finger protein 166	28.0704	0.479848	0.164384	2.91907	0.00351083	0.0708906	30.1559	23.5005	14.227	24.0649	19.8388	42.4839	35.8451	36.823	37.707	32.4427	22.3107	43.8111	20.4475	16.4605	19.3385	30.8352	45.0187	24.4394	16.3881	35.0227	39.7553	15.1005	26.7243	24.565	24.4477	20.5932	35.5523	8.30131	47.0319	24.6545	41.873	27.3382	33.0538	37.3678	19.248	38.3748	10.0799	31.2982	18.2228
ENSSSCG00000016532	WDR91	WD repeat domain 91	33.2877	0.479907	0.170626	2.81262	0.00491399	0.0853767	26.3865	20.1433	24.8973	34.8941	40.7797	45.6078	39.1795	32.1471	25.9236	40.0763	27.6228	35.9643	34.0792	25.5137	41.4396	63.4843	31.3523	44.5659	27.8598	30.5036	36.1645	41.1832	46.2537	44.6637	27.1641	22.3093	13.674	52.5749	30.4638	14.3818	34.9763	42.7159	45.1735	31.6189	28.3058	28.7811	10.0799	31.7329	23.5825
ENSSSCG00000004414	CD164	CD164 molecule	99.4565	0.483103	0.117163	4.12333	3.73438e-05	0.00414311	120.624	67.1444	73.5063	107.089	82.6615	81.8441	82.527	77.153	91.9109	145.038	96.6798	63.1011	53.3907	101.232	67.6847	123.341	90.0374	150.949	90.1348	74.1879	69.2511	124.236	107.925	62.5291	80.1341	128.707	117.596	143.889	119.183	102.727	101.973	136.691	156.454	94.8566	99.6365	68.6707	118.439	99.5458	106.121
ENSSSCG00000009978	AP1B1	adaptor related protein complex 1 subunit beta 1	41.0123	0.483879	0.174745	2.76907	0.00562172	0.0910236	16.3345	28.5364	23.7117	36.0974	37.4732	33.1125	38.7627	40.33	49.4905	57.2519	31.8725	46.7537	23.8554	42.7972	53.8715	56.229	37.3816	28.7522	16.3881	47.8267	52.836	32.2601	62.6994	30.148	36.6715	36.0381	87.5133	24.9039	45.9629	63.6908	59.1149	52.9677	33.0538	56.0516	35.0992	33.8304	28.9797	47.5994	33.2299
ENSSSCG00000004542	NARS1	asparaginyl-tRNA synthetase 1	295.719	0.486954	0.154762	3.14646	0.00165259	0.0484211	268.891	211.505	222.89	304.421	230.35	205.547	229.242	200.481	173.609	318.702	207.171	205.324	305.577	162.136	204.435	386.347	160.379	457.16	303.181	140.844	149.788	194.247	406.004	382.991	251.268	374.109	494.997	625.365	232.487	347.218	171.433	536.511	419.783	395.236	226.447	519.069	355.316	212.785	339.803
ENSSSCG00000007979	LUC7L	LUC7 like	109.514	0.4909	0.135041	3.63519	0.000277779	0.0156674	77.9029	57.0727	68.7639	89.0402	131.156	138.698	110.87	130.926	152.399	206.107	74.3691	130.452	97.6936	101.232	84.2606	121.527	116.566	83.3813	116.356	120.508	128.756	100.899	158.29	77.0448	77.4177	92.6693	95.7177	110.684	114.907	121.218	108.377	123.022	104.67	160.969	75.8596	124.213	62.9992	143.668	80.3949
ENSSSCG00000007790	PRR14	proline rich 14	77.8537	0.491065	0.152502	3.22006	0.00128163	0.0415083	59.0554	60.4299	45.0522	90.2434	91.4787	61.2269	55.018	53.1888	58.9172	137.405	101.992	42.5033	82.926	79.0103	59.3968	132.41	39.7933	90.5694	40.9704	44.0608	42.3201	104.331	93.5352	39.0807	65.1938	78.9405	79.3089	149.424	56.1175	73.9635	56.1591	143.525	136.622	79.0472	79.2563	83.3137	66.7792	78.6803	105.049
ENSSSCG00000038359	-	eukaryotic translation initiation factor 5A	289.69	0.492314	0.0982562	5.01051	5.42847e-07	0.000188513	300.303	308.864	225.261	308.031	319.624	263.65	272.589	189.96	267.877	446.565	213.546	204.997	273.769	231.27	219.63	292.028	261.671	438.471	291.709	196.956	183.644	241.608	336.11	262.399	198.298	350.084	402.014	395.696	298.759	458.163	242.371	415.198	349.268	405.296	236.637	320.631	244.437	238.649	191.876
ENSSSCG00000039473	-	ubiquitin specific peptidase 32	307.813	0.493104	0.130859	3.76822	0.000164414	0.0115711	285.225	325.65	230.004	452.42	234.759	254.279	197.981	189.96	233.312	440.839	286.852	158.897	283.993	238.677	301.128	475.226	172.036	484.474	321.208	179.633	124.908	271.123	507.762	302.596	214.596	300.317	309.031	478.709	176.904	408.854	183.749	408.364	449.531	478.595	259.281	272.158	274.677	395.358	441.636
ENSSSCG00000024813	MAP3K3	mitogen-activated protein kinase kinase kinase 3	44.1841	0.494729	0.177734	2.78354	0.00537697	0.0891394	38.9514	40.2866	22.5261	48.1298	42.984	72.4726	60.4364	61.9562	77.7708	40.0763	30.81	56.5621	24.9914	38.6821	23.4825	27.2076	71.5476	67.5676	32.7763	71.1752	57.7093	65.8931	32.8915	29.0314	24.4477	15.4449	27.3479	52.5749	64.1343	41.0909	85.224	30.7554	29.7484	25.87	26.0414	50.9981	10.0799	59.5536	43.9492
ENSSSCG00000021443	SGK1	serum/glucocorticoid regulated kinase 1	187.1	0.495601	0.182943	2.70905	0.00674756	0.0997414	159.575	77.216	73.5063	129.95	79.355	615.392	370.121	365.308	509.045	118.321	144.489	297.85	166.988	132.507	75.9726	87.0642	341.258	208.453	58.9973	275.286	284.442	152.378	133.622	88.2107	35.3133	51.4829	142.209	69.1776	361.825	82.1817	434.494	111.061	88.1433	135.099	98.5043	282.762	44.0995	312.33	102.905
ENSSSCG00000002008	DCAF11	DDB1 and CUL4 associated factor 11	86.985	0.495835	0.101237	4.89775	9.69415e-07	0.000296582	111.828	88.9663	75.8774	89.0402	62.8227	96.8384	81.6934	79.491	91.1253	104.962	70.1194	64.7358	74.9742	89.7096	77.354	126.969	88.0277	96.3198	78.6631	83.226	83.8708	100.899	102.786	72.5784	66.5521	65.2117	62.9002	94.0815	60.3932	133.545	63.5485	117.896	116.79	110.666	83.7853	92.4024	78.1191	89.3304	64.3159
ENSSSCG00000017529	CBX1	chromobox 1	29.9718	0.499852	0.164064	3.04669	0.00231373	0.0578204	22.617	36.9294	17.7838	32.4876	22.0431	34.362	32.0938	34.4851	30.637	34.3511	14.8738	30.7332	21.5835	23.8677	13.8132	47.1598	41.4011	15.8137	27.8598	43.3076	35.1385	19.2188	41.1144	25.6816	35.3133	27.4576	49.2262	38.7394	34.7394	36.9818	29.5574	25.6295	30.8502	34.4933	23.7769	35.3452	23.9397	29.5594	13.9351
ENSSSCG00000025514	RUFY3	RUN and FYVE domain containing 3	26.4143	0.500801	0.17382	2.88114	0.00396242	0.0763447	42.7209	15.1075	23.7117	25.2682	20.9409	31.2382	37.0955	28.6401	27.4947	30.5343	24.4356	32.6949	10.2237	23.0447	15.1945	32.6491	29.3426	30.1898	34.4151	31.2568	25.3921	28.1418	37.0029	40.1973	17.6567	37.7542	46.4914	16.6026	27.7915	18.4909	29.5574	27.3382	24.2394	20.1211	18.1157	22.217	17.6398	19.5614	9.64739
ENSSSCG00000022777	SLC35C2	solute carrier family 35 member C2	54.155	0.507101	0.136777	3.70751	0.000209304	0.013044	55.2859	20.1433	46.2378	61.3655	51.8012	76.2212	57.102	59.6183	70.7007	70.6107	40.3718	68.3323	62.4785	46.9124	49.7276	61.6705	76.371	51.7539	37.6927	59.5009	70.0206	54.2245	87.368	29.0314	57.0446	36.0381	30.0827	71.9447	61.9965	49.309	67.9821	59.8022	34.1555	57.4888	32.8348	65.6411	31.4996	57.3801	34.3018
ENSSSCG00000027988	-	-	24.4656	0.511282	0.164036	3.11689	0.00182768	0.0515426	31.4124	18.4647	13.0414	28.8779	15.4301	23.1163	26.2586	28.6401	32.9937	34.3511	26.5604	33.3488	21.5835	20.5756	8.28793	30.8352	32.1562	25.877	13.1105	25.608	26.1615	23.3371	20.5572	12.2825	29.8805	15.4449	27.3479	16.6026	24.0504	30.8181	30.0501	34.1727	23.1376	25.87	21.5124	31.8107	16.3798	29.5594	24.6544
ENSSSCG00000000018	KIAA0930	KIAA0930 ortholog	73.6204	0.51631	0.171663	3.00769	0.00263243	0.0622816	91.7243	85.6091	58.0937	92.6499	46.2904	63.1012	27.0922	68.9701	113.907	99.2366	114.741	62.1202	42.031	54.3196	59.3968	74.3674	49.0382	221.392	77.0243	47.8267	38.4728	93.3485	50.3651	46.8968	44.8208	41.1863	43.7567	110.684	60.3932	59.5817	90.1502	117.896	105.772	93.4194	81.5208	58.0671	51.6594	67.8128	66.4598
ENSSSCG00000035564	MCM6	minichromosome maintenance complex component 6	26.7816	0.519573	0.161587	3.21543	0.00130248	0.0417454	26.3865	25.1791	11.8559	38.5039	24.2474	21.8667	22.9242	24.5487	15.7113	30.5343	25.498	25.8289	20.4475	25.5137	17.9572	25.3937	22.1074	33.065	19.6658	31.6334	23.8532	15.7869	39.0586	20.0986	32.5969	15.4449	30.0827	30.4381	27.2571	36.9818	33.4984	56.385	41.8681	28.7444	24.9091	23.7318	25.1997	27.1686	22.5106
ENSSSCG00000012088	-	protein O-fucosyltransferase 2	40.4171	0.520495	0.182955	2.84494	0.00444197	0.0817601	66.5944	16.7861	36.7531	51.7395	25.3495	37.4858	44.1811	39.161	39.2782	51.5267	30.81	55.2543	30.6712	32.0979	29.0077	32.6491	40.1953	44.5659	27.8598	60.6307	51.0406	38.4376	61.6715	33.4977	28.5223	48.0507	49.2262	11.0684	42.7562	43.1454	56.1591	51.2591	51.7842	12.935	16.9835	55.5424	55.4393	50.4249	25.7264
ENSSSCG00000006738	CD58	CD58 molecule	38.9312	0.525095	0.159178	3.29878	0.000971047	0.0349621	28.8995	28.5364	29.6396	72.1947	16.5323	23.741	20.0065	21.6262	18.068	40.0763	42.4966	22.2325	38.6231	46.0893	30.3891	50.7875	20.4996	40.2531	39.3315	22.5953	24.1096	41.1832	66.8108	40.1973	29.8805	46.3346	32.8175	91.3144	19.2403	78.0726	18.7197	42.7159	70.5147	66.1122	54.3472	36.86	44.0995	30.2115	32.158
ENSSSCG00000013776	DDX39A	DExD-box helicase 39A	48.2388	0.525323	0.148545	3.53647	0.000405519	0.0200692	40.2079	43.6438	39.1243	44.5201	58.4141	38.7354	32.0938	46.7594	34.5648	78.2442	40.3718	40.8686	42.031	45.2663	16.5759	83.4365	42.607	37.3778	60.6361	42.1779	35.1385	49.4198	59.6158	31.2646	32.5969	25.7415	49.2262	96.8486	39.0151	69.8545	40.8878	59.8022	60.5986	77.6099	47.5538	55.0375	47.8794	59.1189	36.4457
ENSSSCG00000006061	-	zinc finger protein 706	26.7523	0.536748	0.193785	2.76981	0.00560887	0.0910236	16.3345	13.4289	23.7117	18.0487	22.0431	30.6134	55.018	36.823	33.7792	19.084	24.4356	34.6566	23.8554	18.1065	24.8638	27.2076	30.5484	24.4394	19.6658	42.5545	50.5277	30.201	35.9751	11.1659	24.4477	22.3093	19.1435	49.8078	31.5327	30.8181	39.9025	23.9209	13.2215	34.4933	12.4546	25.2466	3.77995	26.9513	18.2228
ENSSSCG00000039198	PCGF2	polycomb group ring finger 2	24.5479	0.543417	0.185737	2.92573	0.00343647	0.0701934	22.617	21.8219	28.454	33.6909	28.656	18.1182	21.257	26.8867	23.5669	55.3435	25.498	22.8864	23.8554	35.39	13.8132	14.5107	22.5094	37.3778	14.7493	18.0762	12.5678	27.4554	37.0029	12.2825	12.2238	6.86439	38.2871	35.9723	27.2571	36.9818	20.1976	20.5036	34.1555	22.9955	26.0414	17.1677	18.8998	19.9961	21.4386
ENSSSCG00000014168	ELL2	elongation factor for RNA polymerase II 2	42.524	0.547258	0.19771	2.76799	0.00564039	0.091027	65.3379	50.3583	33.1964	57.7558	58.4141	11.8705	12.0873	11.1054	9.42676	57.2519	36.1221	8.17372	59.0706	62.5498	59.3968	63.4843	12.8625	84.819	32.7763	6.402	13.0808	74.8161	94.563	37.9641	27.1641	39.4703	73.8394	74.7118	11.758	51.3636	9.85248	52.9677	44.0717	71.8611	44.1571	15.6529	31.4996	36.0799	61.1001
ENSSSCG00000013437	TCF3	transcription factor 3	62.0789	0.550894	0.136546	4.03448	5.47226e-05	0.00541766	87.9549	21.8219	48.609	62.5688	54.0055	49.9811	78.359	82.998	51.0616	68.7023	41.4342	93.5073	51.1187	46.0893	48.3462	79.8089	76.773	48.8787	68.8302	80.5899	97.208	45.3015	92.5073	55.8296	54.3282	66.9278	60.1654	44.2736	67.8755	76.0181	86.7018	70.054	74.9218	45.9911	31.7025	67.6608	41.5795	66.2914	34.3018
ENSSSCG00000030369	YARS1	tyrosyl-tRNA synthetase 1	63.6149	0.553695	0.16884	3.2794	0.00104027	0.0366359	47.7469	58.7513	35.5676	69.7882	73.8443	47.4821	71.2733	65.4632	77.7708	74.4274	28.6852	80.4294	22.7194	70.78	53.8715	67.112	70.3418	44.5659	36.0539	50.8394	57.7093	52.8517	83.2566	62.5291	74.7013	42.9024	71.1046	132.821	73.7545	92.4544	58.6223	97.3922	90.3469	81.9216	47.5538	71.7003	51.6594	41.9483	48.2369
ENSSSCG00000033033	TOLLIP	toll interacting protein	35.0022	0.554198	0.183796	3.0153	0.00256728	0.0621565	30.1559	28.5364	24.8973	54.146	48.4947	23.1163	39.5963	20.4572	36.1359	55.3435	22.3107	34.9835	21.5835	27.1598	48.3462	23.5799	41.8031	41.6907	26.221	34.6461	30.7783	48.7334	68.8666	30.148	27.1641	25.7415	38.2871	22.1368	36.3428	61.6363	38.4247	22.2123	35.2573	53.1772	32.8348	24.7416	16.3798	30.4288	38.5896
ENSSSCG00000008682	NSD2	nuclear receptor binding SET domain protein 2	59.2932	0.554338	0.184	3.0127	0.00258933	0.0622816	47.7469	48.6797	42.6811	45.7233	80.4572	88.7165	69.6061	66.0477	83.2697	104.962	36.1221	90.8917	39.759	41.1512	49.7276	48.9736	68.332	35.9402	24.5822	63.6434	60.2741	44.6151	128.482	52.4798	31.2387	29.1737	49.2262	91.3144	60.3932	69.8545	69.9526	44.4245	58.395	81.9216	64.5373	55.0375	32.7596	68.4649	42.8773
ENSSSCG00000040060	APEX1	apurinic/apyrimidinic endodeoxyribonuclease 1	44.0027	0.556829	0.1491	3.7346	0.000188013	0.0124917	35.1819	25.1791	29.6396	33.6909	39.6775	38.7354	55.018	50.2664	48.7049	45.8015	38.247	45.7728	23.8554	46.9124	26.2451	81.6227	54.6656	44.5659	26.221	46.6969	48.9887	39.124	53.4487	42.4305	43.4626	51.4829	92.9829	33.2052	52.3764	47.2545	52.7108	59.8022	36.3591	41.6794	29.4381	53.0178	23.9397	54.1199	23.5825
ENSSSCG00000013729	GCDH	glutaryl-CoA dehydrogenase	22.5759	0.55692	0.189675	2.93618	0.00332285	0.0691702	10.052	15.1075	9.48468	34.8941	14.328	27.4896	31.677	21.6262	21.9958	32.4427	21.2483	21.2517	17.0396	18.9295	22.1011	19.9522	22.5094	24.4394	21.3046	21.4655	22.0578	17.846	18.5015	14.5157	17.6567	17.161	21.8783	30.4381	22.447	20.5454	25.1238	47.8418	47.377	24.4328	21.5124	18.6825	13.8598	26.7339	22.5106
ENSSSCG00000013655	ICAM1	intercellular adhesion molecule 1	102.198	0.557617	0.197884	2.81789	0.00483401	0.0850247	153.293	139.325	139.899	103.479	154.301	12.4953	16.2553	9.93638	17.2824	221.374	142.364	6.86592	57.9346	184.357	110.506	195.894	12.8625	287.522	101.606	4.14247	6.92511	256.022	133.622	117.242	61.1192	92.6693	259.805	66.4105	21.3781	125.327	12.3156	99.1008	152.047	158.094	132.471	20.1973	74.3391	13.4756	111.481
ENSSSCG00000030696	SLC19A1	solute carrier family 19 member 1	249.334	0.5596	0.196152	2.85289	0.00433232	0.0804027	224.913	312.221	221.704	400.681	185.162	105.585	112.12	104.624	158.684	423.664	199.734	90.5648	388.502	116.046	129.844	330.118	77.1749	307.648	422.814	85.8621	43.6025	167.478	434.784	308.179	224.104	286.588	470.384	611.53	113.838	363.654	86.7018	486.961	310.705	405.296	152.852	245.397	291.057	105.632	217.602
ENSSSCG00000015140	HSPA8	heat shock protein family A (Hsp70) member 8	922.36	0.560677	0.19717	2.84363	0.00446029	0.0818747	1888.52	1055.85	545.369	1286.27	806.776	1383.85	499.33	673.92	578.96	1280.53	1199.47	651.936	648.64	1612.3	946.205	700.141	560.724	1896.21	1148.81	1190.4	631.211	1116.06	1999.19	437.704	634.282	593.77	598.919	819.062	676.617	1220.4	571.444	743.256	815.326	1158.4	624.993	501.397	633.772	1040.67	601.354
ENSSSCG00000016991	DUSP1	dual specificity phosphatase 1	117.795	0.562588	0.18307	3.07309	0.00211857	0.0557009	84.1854	80.5732	98.4036	114.308	135.565	70.5983	66.2717	78.322	103.694	221.374	86.0557	56.8891	177.212	108.639	74.5913	235.799	56.2734	156.699	117.995	52.3458	64.1214	124.922	159.318	84.8609	48.8954	90.9532	161.353	196.464	51.3075	121.218	65.0264	179.407	181.796	209.834	131.339	117.649	165.058	167.141	97.5458
ENSSSCG00000001379	TUBB	tubulin beta class I	303.371	0.563416	0.134569	4.18683	2.82878e-05	0.00339992	267.634	276.971	205.106	364.583	385.754	207.422	238.411	205.157	220.743	526.717	282.603	209.247	162.444	257.606	186.478	395.417	280.563	286.084	345.79	257.963	234.684	218.957	486.177	244.534	245.835	315.762	265.275	492.544	268.295	507.472	238.43	500.63	540.98	438.352	272.868	227.219	347.756	236.476	186.516
ENSSSCG00000016095	CLK1	CDC like kinase 1	373.65	0.564313	0.152094	3.71029	0.000207023	0.0130143	306.585	241.72	227.632	430.762	299.786	413.594	270.505	288.155	302.442	515.267	326.162	202.708	496.42	310.28	233.443	496.992	256.848	461.473	409.704	325.372	260.846	416.636	688.666	378.524	321.895	296.885	489.528	531.284	215.384	421.181	184.241	519.425	420.884	528.897	343.067	466.052	347.756	633.789	291.566
ENSSSCG00000000753	WNK1	WNK lysine deficient protein kinase 1	207.307	0.569893	0.134704	4.2307	2.32961e-05	0.00309471	138.215	174.575	150.569	250.275	146.586	164.313	158.802	174.179	114.692	242.366	190.172	143.53	174.94	202.464	128.463	351.885	148.321	245.831	278.598	172.101	144.145	186.011	415.255	218.852	137.179	214.512	205.109	293.313	161.939	330.781	131.531	254.587	267.735	376.552	187.951	230.249	195.298	235.171	147.927
ENSSSCG00000027514	ELP5	elongator acetyltransferase complex subunit 5	27.0802	0.575326	0.203863	2.82212	0.00477073	0.0845005	23.8735	13.4289	9.48468	13.2357	23.1452	35.6115	33.3442	32.7316	26.7092	24.8091	22.3107	34.0027	44.3029	24.6907	9.66925	21.7661	32.1562	34.5026	29.4987	33.5163	32.3172	32.2601	33.9193	25.6816	6.79103	12.0127	46.4914	52.5749	27.7915	28.7636	30.0501	39.2986	25.3412	15.8094	21.5124	32.8205	12.5998	35.8626	21.4386
ENSSSCG00000038913	HERC4	HECT and RLD domain containing E3 ubiquitin protein ligase 4	51.2146	0.577003	0.158956	3.62994	0.000283483	0.0157342	69.1074	16.7861	45.0522	40.9103	60.6184	51.8554	47.5155	35.0696	36.9215	85.8778	52.0584	35.3105	54.5267	60.9038	30.3891	56.229	34.5679	99.195	45.8868	45.1906	43.6025	74.1297	94.563	44.6637	52.97	24.0254	62.9002	52.5749	30.9983	43.1454	44.3362	73.4713	41.8681	80.4844	47.5538	43.929	41.5795	40.8616	55.7405
ENSSSCG00000046003	TSC1	TSC complex subunit 1	140.473	0.578068	0.144016	4.01393	5.97164e-05	0.00575708	108.059	95.6807	90.1045	161.235	103.602	156.191	92.1135	130.342	96.6243	232.824	122.178	112.143	180.62	130.861	91.1672	232.171	105.714	230.018	113.078	136.325	114.649	155.81	227.157	96.0269	74.7013	126.991	125.8	166.026	101.012	182.854	108.87	191.367	114.586	201.211	133.604	183.795	162.538	151.057	139.351
ENSSSCG00000013895	MAST3	microtubule associated serine/threonine kinase 3	189.938	0.578292	0.151572	3.8153	0.000136015	0.00973906	145.754	157.789	103.146	204.552	246.882	208.046	159.636	171.256	172.038	301.527	167.862	147.781	224.922	154.728	114.65	172.315	155.154	192.64	175.353	132.936	143.119	146.887	420.394	108.309	131.746	181.906	185.966	235.204	174.766	363.654	143.846	223.831	240.191	333.435	152.852	229.239	168.838	184.747	129.704
ENSSSCG00000029226	UBC	ubiquitin C	252.702	0.578711	0.195635	2.95812	0.00309521	0.0670471	237.478	347.472	201.549	279.153	162.017	129.951	142.13	120.99	135.902	354.962	141.301	107.566	380.551	159.667	175.428	473.412	137.87	336.401	347.429	85.1089	57.9657	270.436	274.438	338.327	171.134	351.8	434.832	639.201	126.131	347.218	106.407	577.519	265.532	354.994	177.761	238.833	215.457	265.6	185.444
ENSSSCG00000025582	-	PX domain containing 1	80.4302	0.582256	0.187661	3.1027	0.00191764	0.0526213	59.0554	82.2519	29.6396	73.398	58.4141	46.8573	63.7709	54.9423	47.1338	127.863	86.0557	72.5826	55.6626	56.7886	53.8715	85.2504	72.7535	80.5061	77.0243	42.1779	54.8879	64.5203	125.399	43.5471	42.1044	108.114	109.392	163.259	57.7209	168.473	62.0706	111.061	136.622	110.666	37.3637	125.728	68.0392	72.8119	148.999
ENSSSCG00000007807	CD19	CD19 molecule	66.8796	0.582262	0.18365	3.17049	0.00152182	0.045727	87.9549	47.0011	32.0108	67.3817	56.2098	56.8535	96.6983	91.1809	63.6306	59.1603	67.9946	111.163	54.5267	34.567	45.5836	90.6919	83.2042	51.7539	98.3289	73.4347	89.0005	50.7926	87.368	42.4305	66.5521	72.0761	60.1654	88.5473	61.4621	80.1272	82.2682	29.0468	133.317	73.2983	32.8348	62.1066	40.3195	47.5994	39.6615
ENSSSCG00000017947	ACADVL	acyl-CoA dehydrogenase very long chain	36.2435	0.58993	0.160914	3.66611	0.000246268	0.0146254	23.8735	23.5005	20.1549	40.9103	20.9409	21.8667	37.5123	29.8091	15.7113	68.7023	36.1221	32.041	35.2151	47.7354	26.2451	43.5321	45.4207	35.9402	32.7763	35.7759	34.1126	37.7512	54.4765	34.6143	19.0149	32.6059	32.8175	55.342	36.8772	41.0909	30.0501	64.9281	44.0717	50.3027	36.2315	33.8304	31.4996	46.5127	23.5825
ENSSSCG00000023323	-	chromosome 2 C11orf98 homolog	19.1305	0.593251	0.216062	2.74574	0.00603741	0.094504	32.6689	11.7503	15.4126	20.4552	8.81723	11.2458	27.0922	15.1968	14.1401	43.8931	21.2483	20.2708	23.8554	11.5223	12.4319	34.4629	26.5289	8.62566	13.1105	20.7123	22.0578	15.1005	26.7243	15.6323	25.8059	18.8771	8.20437	19.3697	20.3092	22.6	15.2713	25.6295	12.1197	25.87	13.5868	22.217	12.5998	16.7359	13.9351
ENSSSCG00000003030	CIC	capicua transcriptional repressor	304.455	0.59409	0.123787	4.7993	1.59217e-06	0.000423015	261.352	171.218	225.261	392.258	317.42	189.303	230.492	186.453	229.384	324.427	334.661	185.38	424.854	224.685	215.486	487.922	217.456	462.91	258.933	202.604	197.75	340.447	576.629	305.946	209.164	219.661	309.031	381.86	220.195	417.072	182.764	497.213	418.681	580.637	277.397	272.663	263.337	304.94	355.881
ENSSSCG00000003928	PLK3	polo like kinase 3	29.296	0.596571	0.200849	2.97025	0.00297562	0.0662367	30.1559	23.5005	13.0414	31.2844	37.4732	15.6191	19.1729	22.2107	28.2803	45.8015	38.247	20.9247	34.0792	37.0361	15.1945	52.6013	20.4996	56.0668	21.3046	21.8421	17.441	33.6329	57.5601	11.1659	35.3133	27.4576	32.8175	41.5065	22.447	22.6	27.5869	23.9209	42.9699	40.2422	24.9091	25.2466	7.55991	27.386	36.4457
ENSSSCG00000003931	KIF2C	kinesin family member 2C	30.2195	0.598626	0.212817	2.81287	0.00491018	0.0853767	17.591	28.5364	29.6396	13.2357	25.3495	8.12193	12.0873	10.5209	17.2824	24.8091	21.2483	12.0971	17.0396	21.3986	26.2451	43.5321	10.8527	41.6907	24.5822	7.15517	9.74645	22.6507	43.1701	26.7982	25.8059	20.5932	60.1654	113.451	48.1008	67.7999	7.88199	49.5504	41.8681	80.4844	36.2315	32.3156	28.9797	15.6491	34.3018
ENSSSCG00000034211	-	Spi-B transcription factor	101.894	0.610999	0.157064	3.89014	0.000100188	0.00809198	126.906	73.8588	73.5063	126.341	84.8658	91.2155	132.127	106.378	90.3398	104.962	82.8684	171.648	78.3821	80.6563	80.1166	112.458	187.712	123.634	90.1348	96.4066	151.07	94.0349	158.29	54.713	96.4326	106.398	79.3089	74.7118	125.062	110.945	164.536	61.5109	132.215	109.229	35.0992	115.629	64.2592	66.9434	58.9563
ENSSSCG00000009100	TNIP3	TNFAIP3 interacting protein 3	28.9146	0.613904	0.217928	2.817	0.0048475	0.0851137	43.9774	53.7155	35.5676	46.9266	37.4732	3.12382	5.41844	5.84493	6.28451	26.7175	44.6215	2.61559	21.5835	37.8591	16.5759	99.7611	2.81367	64.6924	27.8598	4.14247	2.30837	42.5559	22.6129	30.148	23.0895	29.1737	38.2871	41.5065	0.534453	36.9818	0.985248	44.4245	60.5986	64.675	46.4216	4.03945	27.7197	1.52144	22.5106
ENSSSCG00000008192	TMEM131	transmembrane protein 131	226.418	0.617694	0.135749	4.55027	5.35761e-06	0.0010606	232.452	191.361	175.467	253.885	170.834	141.197	115.038	120.99	102.123	314.885	218.858	123.914	227.194	204.11	147.801	333.746	145.507	392.467	288.431	114.106	98.4905	261.513	426.561	203.22	175.208	240.254	336.379	354.189	136.82	283.527	113.796	410.072	287.568	326.249	167.571	326.186	210.417	187.789	270.127
ENSSSCG00000032097	DUSP16	dual specificity phosphatase 16	40.31	0.618372	0.186638	3.31322	0.00092229	0.0338598	55.2859	41.9652	29.6396	62.5688	39.6775	27.4896	27.0922	19.8728	50.2761	30.5343	43.559	38.5799	46.5749	52.6735	29.0077	61.6705	25.725	94.8822	26.221	33.1398	34.3691	40.4968	59.6158	30.148	23.0895	34.322	49.2262	77.4789	32.0672	67.7999	33.9911	27.3382	42.9699	28.7444	19.248	21.712	26.4597	44.7739	41.8054
ENSSSCG00000006263	ATP6V1H	ATPase H+ transporting V1 subunit H	27.9164	0.618697	0.19679	3.14394	0.00166688	0.0486383	33.9254	25.1791	33.1964	39.7071	18.7366	32.4877	30.0098	32.7316	21.2102	55.3435	32.9349	18.3091	32.9432	15.6375	17.9572	72.5535	31.3523	40.2531	18.027	24.4782	23.0837	37.0648	34.9472	13.3991	51.6118	8.58049	19.1435	16.6026	18.1714	22.6	19.2123	25.6295	28.6466	33.0561	22.6447	22.7219	18.8998	22.1696	23.5825
ENSSSCG00000004561	HERC1	HECT and RLD domain containing E3 ubiquitin protein ligase family member 1	336.489	0.62119	0.160829	3.86242	0.000112272	0.00865262	262.608	318.936	283.355	364.583	222.635	235.536	192.563	229.121	167.325	324.427	342.098	166.09	316.936	212.34	211.342	500.619	207.408	543.416	412.981	247.042	213.652	315.738	843.872	422.072	232.253	351.8	360.992	611.53	216.988	451.999	184.734	379.317	434.106	717.173	311.364	404.955	255.777	373.623	279.774
ENSSSCG00000015485	SUCO	SUN domain containing ossification factor	35.0916	0.623359	0.202799	3.07378	0.00211362	0.0557009	51.5164	30.215	16.5982	44.5201	19.8388	21.242	20.0065	23.3797	21.2102	103.053	32.9349	24.1942	20.4475	32.9209	31.7704	43.5321	26.9308	44.5659	27.8598	23.7251	18.9799	22.6507	64.7551	51.3632	33.9551	44.6185	35.5523	47.0407	21.9126	36.9818	25.6165	58.0936	30.8502	53.1772	50.9505	22.7219	31.4996	42.383	15.0071
ENSSSCG00000003152	RUVBL2	RuvB like AAA ATPase 2	28.0744	0.624375	0.20934	2.98258	0.00285828	0.0650907	26.3865	15.1075	7.11351	30.0811	33.0646	28.7391	35.0115	28.6401	36.9215	45.8015	10.6242	37.2721	42.031	29.6289	16.5759	43.5321	36.9797	25.877	16.3881	39.9183	39.4988	16.4733	30.8358	23.4484	24.4477	30.8898	16.4087	16.6026	26.1882	30.8181	39.9025	25.6295	45.1735	45.9911	18.1157	23.2268	16.3798	27.386	11.7913
ENSSSCG00000025374	DVL3	dishevelled segment polarity protein 3	21.4755	0.625522	0.207877	3.0091	0.00262024	0.0622816	17.591	21.8219	9.48468	52.9428	19.8388	20.6172	22.9242	19.8728	20.4246	9.54198	18.0611	22.2325	20.4475	22.2216	23.4825	23.5799	14.0684	30.1898	13.1105	21.8421	22.3142	33.6329	28.7801	7.81614	14.9403	10.2966	30.0827	27.671	18.1714	28.7636	26.6017	5.12591	22.0358	33.0561	19.248	21.712	16.3798	23.039	23.5825
ENSSSCG00000001052	PHACTR1	phosphatase and actin regulator 1	81.7069	0.630545	0.146992	4.28965	1.78954e-05	0.00261109	86.6984	107.431	67.5783	141.983	83.7636	79.345	61.6868	61.3717	98.981	145.038	58.4329	69.967	71.5662	102.878	49.7276	132.41	57.8812	125.072	91.7736	54.2287	52.5795	76.1889	112.037	87.0941	55.6864	56.6312	79.3089	124.52	49.7041	115.054	63.0559	83.7231	147.64	71.8611	83.7853	35.8501	44.0995	49.5555	50.3808
ENSSSCG00000016078	HSPE1	heat shock protein family E (Hsp10) member 1	63.7662	0.63302	0.219092	2.8893	0.00386106	0.075545	82.9289	36.9294	32.0108	43.3168	68.3335	97.4632	58.7692	54.9423	75.4141	120.229	40.3718	54.6004	57.9346	74.0721	51.1089	39.9044	85.616	53.1915	77.0243	146.116	69.7641	45.3015	150.067	26.7982	55.6864	20.5932	76.5741	27.671	68.41	55.4727	64.5338	78.5972	90.3469	54.6144	41.8926	43.4241	49.1394	80.2017	37.5176
ENSSSCG00000010306	SEC24C	SEC24 homolog C, COPII coat complex component	84.5281	0.633864	0.14153	4.47866	7.51144e-06	0.00144365	61.5684	68.823	62.836	77.0077	78.2529	73.7221	67.5221	69.5546	65.2018	175.572	62.6825	77.4868	68.1583	65.8419	71.8287	105.203	86.4199	104.945	63.9138	83.226	80.0235	70.6978	170.625	85.9775	58.4028	78.9405	49.2262	127.287	77.4957	108.891	93.5986	134.982	109.077	103.48	47.5538	60.5918	75.5991	100.415	73.9633
ENSSSCG00000017283	CD79B	CD79b molecule	181.924	0.637405	0.183976	3.4646	0.000531014	0.0237218	179.679	151.075	122.115	157.625	154.301	157.441	249.665	209.248	175.966	265.267	158.3	300.139	157.9	114.4	142.276	228.544	266.495	119.322	198.297	132.936	225.964	118.745	293.968	125.058	190.149	132.14	95.7177	246.272	204.695	207.509	268.973	259.713	315.112	192.588	78.1241	225.199	76.8591	97.5896	99.6897
ENSSSCG00000034742	MECP2	methyl-CpG binding protein 2	32.9632	0.642467	0.158642	4.0498	5.12616e-05	0.00529581	33.9254	21.8219	33.1964	49.3331	16.5323	26.8648	25.8418	23.3797	31.4225	59.1603	38.247	22.2325	30.6712	35.39	29.0077	47.1598	26.9308	57.5044	36.0539	27.4909	20.5188	30.8874	35.9751	25.6816	17.6567	41.1863	19.1435	60.8762	19.7748	63.6908	20.6902	41.0072	55.0896	44.5539	29.4381	15.6529	23.9397	18.692	28.9422
ENSSSCG00000007763	BCKDK	branched chain keto acid dehydrogenase kinase	17.382	0.645937	0.22968	2.81234	0.00491831	0.0853767	20.104	26.8577	13.0414	12.0325	15.4301	19.3677	29.1762	24.5487	30.637	17.1756	12.749	23.8672	18.1756	8.23024	9.66925	16.3245	31.7543	11.5009	9.83289	17.3231	26.931	31.5738	23.6408	5.58296	9.50744	15.4449	10.9392	13.8355	14.9647	22.6	19.2123	29.0468	11.0179	12.935	16.9835	16.6627	7.55991	16.3012	5.35966
ENSSSCG00000006378	SLAMF7	SLAM family member 7	135.141	0.646933	0.226412	2.85733	0.00427223	0.079875	371.923	142.682	124.486	175.674	234.759	108.709	61.6868	56.1113	72.2718	295.801	149.801	31.714	65.8864	364.6	59.3968	170.501	83.2042	304.773	181.908	74.5645	42.5766	157.869	130.538	148.507	108.656	126.991	153.148	146.656	43.8251	172.582	49.755	152.069	132.215	273.072	67.934	24.7416	95.7589	58.4668	54.6685
ENSSSCG00000013742	NFIX	nuclear factor I X	43.8046	0.64968	0.175132	3.70966	0.000207538	0.0130143	46.4904	45.3224	47.4234	22.8617	40.7797	34.362	22.9242	31.5626	28.2803	91.603	26.5604	27.7906	31.8072	36.213	22.1011	43.5321	41.8031	92.007	45.8868	27.1143	25.905	47.3606	44.1979	43.5471	27.1641	39.4703	84.7785	96.8486	37.4117	59.5817	26.1091	68.3454	60.5986	40.2422	37.3637	38.3748	37.7995	49.3382	37.5176
ENSSSCG00000006538	FLAD1	flavin adenine dinucleotide synthetase 1	51.2616	0.651177	0.188142	3.46109	0.000537992	0.0238226	70.3639	63.7872	50.9802	37.3006	33.0646	46.2325	51.6836	37.992	33.7792	103.053	31.8725	35.3105	69.2943	28.8058	37.2957	59.8566	33.764	89.1318	50.8032	40.2949	40.2682	69.325	56.5322	34.6143	42.1044	41.1863	60.1654	132.821	30.9983	39.0363	23.1533	78.5972	51.7842	47.4283	30.5703	69.1756	40.3195	56.076	50.3808
ENSSSCG00000038643	KLF11	Kruppel like factor 11	29.6963	0.652807	0.192217	3.39621	0.000683266	0.0274831	18.8475	10.0717	11.8559	24.0649	28.656	48.1068	51.2668	43.2525	39.2782	22.9008	9.56174	50.3501	13.6317	18.9295	6.9066	30.8352	49.4402	30.1898	19.6658	52.3458	53.6055	18.5324	49.3372	30.148	31.2387	10.2966	35.5523	13.8355	47.5663	22.6	35.4689	30.7554	25.3412	34.4933	19.248	44.9389	22.6797	35.2105	17.1509
ENSSSCG00000031299	-	trans-2,3-enoyl-CoA reductase	19.9025	0.658692	0.2416	2.72637	0.00640346	0.0972171	18.8475	15.1075	17.7838	14.4389	19.8388	20.6172	20.8402	12.8588	29.8514	61.0687	8.49932	22.5595	5.67986	17.2835	13.8132	10.883	26.5289	20.1265	21.3046	18.0762	24.6226	15.1005	31.8636	10.0493	14.9403	22.3093	13.674	8.30131	17.1025	34.9272	21.6755	44.4245	22.0358	15.8094	18.1157	16.1578	15.1198	22.1696	11.7913
ENSSSCG00000007947	PAM16	mitochondrial import inner membrane translocase subunit TIM16	18.5484	0.659149	0.240702	2.73845	0.00617297	0.09544	21.3605	30.215	23.7117	19.2519	14.328	11.8705	8.75286	16.9503	19.6391	20.9924	11.6866	6.86592	2.27194	17.2835	12.4319	30.8352	10.4508	27.3146	21.3046	7.15517	11.5419	26.0827	19.5293	26.7982	19.0149	18.8771	35.5523	60.8762	11.758	14.3818	7.38936	20.5036	25.3412	25.87	16.9835	19.1874	12.5998	9.99805	6.43159
ENSSSCG00000030996	XBP1	X-box binding protein 1	32.0914	0.660261	0.200926	3.28609	0.00101589	0.0361141	13.8215	23.5005	21.3405	25.2682	17.6345	21.242	23.7578	31.5626	25.138	49.6183	15.9362	27.7906	27.2633	24.6907	19.3385	18.1384	22.9113	50.3163	26.221	32.3866	25.1356	40.4968	53.4487	20.0986	17.6567	51.4829	51.961	94.0815	42.2218	55.4727	25.1238	34.1727	24.2394	41.6794	32.8348	28.2762	25.1997	31.5156	38.5896
ENSSSCG00000006487	CCT3	chaperonin containing TCP1 subunit 3	132.773	0.661597	0.144158	4.5894	4.4453e-06	0.000897596	232.452	80.5732	97.218	119.121	133.361	178.682	102.95	107.547	99.7665	242.366	96.6798	115.413	118.141	150.613	109.124	150.549	135.056	230.018	124.55	203.734	130.808	133.845	203.516	74.8116	100.507	72.0761	103.922	113.451	133.079	158.2	104.929	160.612	141.029	160.969	90.5787	109.065	129.778	131.496	97.5458
ENSSSCG00000040581	CISH	cytokine inducible SH2 containing protein	118.63	0.66296	0.233661	2.83727	0.00455013	0.0824737	84.1854	68.823	87.7333	99.8694	149.893	28.7391	37.5123	26.3022	34.5648	129.771	118.991	40.5416	81.79	118.515	87.0232	194.081	37.7836	100.633	86.8572	43.3076	23.8532	105.017	107.925	93.7937	92.3579	94.3854	117.596	204.766	26.1882	92.4544	32.5132	821.853	462.753	179.653	121.149	69.6805	141.118	58.2495	124.344
ENSSSCG00000015111	C2CD2L	C2CD2 like	18.4534	0.663048	0.225329	2.94257	0.00325497	0.068628	3.76949	5.03583	16.5982	9.62596	11.0215	23.1163	15.8385	15.7813	18.8535	20.9924	11.6866	17.3283	19.3115	15.6375	5.52528	23.5799	16.882	20.1265	16.3881	21.0889	16.928	19.2188	28.7801	16.7489	17.6567	12.0127	16.4087	22.1368	16.0336	26.7091	32.0206	41.0072	30.8502	25.87	21.5124	26.7614	11.3399	25.2125	4.28773
ENSSSCG00000036695	IGF2BP3	insulin like growth factor 2 mRNA binding protein 3	23.2131	0.66332	0.242899	2.73084	0.00631725	0.0966348	16.3345	10.0717	10.6703	4.81298	14.328	29.3639	32.0938	21.0417	37.707	20.9924	25.498	40.2147	28.3993	16.4605	8.28793	39.9044	24.5191	17.2513	16.3881	26.3612	27.444	13.0413	53.4487	17.8655	17.6567	12.0127	41.0219	19.3697	31.5327	16.4363	35.4689	22.2123	30.8502	35.9305	15.8513	19.1874	17.6398	24.7778	12.8632
ENSSSCG00000017178	SPHK1	sphingosine kinase 1	32.9335	0.666681	0.237285	2.80962	0.00496002	0.0857472	38.9514	26.8577	47.4234	52.9428	34.1667	9.37146	8.75286	12.8588	32.2081	125.954	23.3731	14.0588	32.9432	42.7972	22.1011	14.5107	13.6664	60.3796	22.9434	7.15517	10.0029	58.3428	25.6965	16.7489	17.6567	27.4576	46.4914	91.3144	21.3781	39.0363	11.823	27.3382	55.0896	44.5539	54.3472	33.8304	15.1198	12.6062	32.158
ENSSSCG00000006482	MEF2D	myocyte enhancer factor 2D	142.714	0.667112	0.128093	5.20801	1.9088e-07	8.75964e-05	115.598	92.3235	81.8054	166.048	87.0701	148.694	176.724	152.553	142.187	122.137	117.928	156.608	194.251	125.1	96.6925	157.804	174.448	232.893	72.1078	149.882	163.894	141.396	166.513	121.708	119.522	101.25	213.314	207.533	170.49	156.145	144.831	126.439	128.91	198.337	72.4629	193.389	76.8591	192.788	107.193
ENSSSCG00000000693	NCAPD2	non-SMC condensin I complex subunit D2	47.8875	0.668549	0.182525	3.66277	0.000249498	0.014645	37.6949	48.6797	36.7531	45.7233	35.2689	26.2401	26.6754	32.7316	29.8514	57.2519	37.1845	22.5595	46.5749	48.5584	13.8132	81.6227	21.3035	47.4411	55.7197	22.9719	30.0088	45.9879	105.869	49.13	21.7313	44.6185	49.2262	91.3144	32.6016	94.509	19.705	82.0145	93.6523	81.9216	46.4216	56.0474	61.7393	54.3372	32.158
ENSSSCG00000035238	ELOVL1	ELOVL fatty acid elongase 1	50.2208	0.669552	0.162866	4.11106	3.93844e-05	0.00427553	41.4644	35.2508	35.5676	58.959	42.984	49.9811	48.3492	54.3578	53.4183	108.779	35.0597	45.4459	37.4871	32.0979	34.533	47.1598	37.7836	46.0035	60.6361	57.9946	40.5247	47.3606	55.5044	21.2152	38.0297	48.0507	57.4306	116.218	52.3764	53.4181	54.1886	105.935	37.4609	48.8655	30.5703	55.5424	37.7995	50.8596	43.9492
ENSSSCG00000015659	YOD1	YOD1 deubiquitinase	41.5325	0.671752	0.217406	3.08985	0.00200259	0.0539913	22.617	38.608	47.4234	50.5363	46.2904	24.9906	25.0082	28.6401	26.7092	61.0687	49.9335	22.5595	28.3993	24.6907	24.8638	65.2982	23.7152	74.7557	47.5256	28.6207	18.2105	24.7099	81.2009	35.7309	23.0895	25.7415	46.4914	66.4105	32.0672	88.3453	27.0943	39.2986	63.9039	79.0472	36.2315	29.7909	37.7995	85.2007	17.1509
ENSSSCG00000022507	POLR2H	RNA polymerase II subunit H	13.9976	0.672357	0.237266	2.83377	0.0046002	0.082935	10.052	10.0717	7.11351	16.8454	12.1237	23.1163	20.0065	19.8728	14.1401	3.81679	8.49932	13.7318	4.54389	13.9914	11.0506	19.9522	22.5094	8.62566	9.83289	23.7251	21.5448	6.86386	17.4736	11.1659	12.2238	8.58049	30.0827	19.3697	13.3613	20.5454	13.3008	20.5036	11.0179	14.3722	9.05787	14.1381	11.3399	14.1277	3.2158
ENSSSCG00000012988	EHBP1L1	EH domain binding protein 1 like 1	710.459	0.67776	0.145215	4.66728	3.05216e-06	0.000684768	427.209	553.941	487.275	640.127	655.781	541.67	517.669	534.226	611.954	1507.63	669.322	467.537	557.762	487.23	422.684	865.201	534.597	934.446	668.636	466.593	452.697	467.429	1421.53	744.766	423.76	610.931	735.659	1502.54	556.365	928.653	549.276	1125.99	1065.43	1139.72	664.621	807.89	684.172	742.246	532.75
ENSSSCG00000005511	TRAF1	TNF receptor associated factor 1	27.2814	0.678734	0.237253	2.8608	0.00422569	0.0797897	33.9254	30.215	9.48468	15.6422	56.2098	19.3677	16.6721	12.2743	16.4968	51.5267	22.3107	17.0013	24.9914	27.1598	9.66925	43.5321	10.0488	54.6292	26.221	9.79129	10.2594	21.278	38.0308	10.0493	20.3731	6.86439	62.9002	41.5065	12.2924	30.8181	11.3304	30.7554	58.395	64.675	52.0827	16.1578	30.2396	15.2144	23.5825
ENSSSCG00000012884	PPP6R3	protein phosphatase 6 regulatory subunit 3	291.888	0.681229	0.152306	4.47276	7.72156e-06	0.00144365	204.809	255.149	196.807	294.795	223.737	174.309	153.384	193.467	131.189	406.488	236.919	138.953	248.778	204.11	157.471	393.603	142.693	388.155	278.598	184.905	121.061	250.531	575.601	341.677	264.85	296.885	330.91	545.119	160.336	591.708	141.383	598.022	485.89	602.196	276.265	424.647	337.676	225.825	204.739
ENSSSCG00000024793	PORCN	porcupine O-acyltransferase	31.5141	0.681694	0.242094	2.81582	0.00486525	0.085277	33.9254	47.0011	37.9387	38.5039	38.5754	26.8648	17.5057	21.6262	66.7729	87.7862	44.6215	23.2134	17.0396	14.8144	11.0506	34.4629	18.0879	24.4394	21.3046	22.5953	15.1326	8.92302	66.8108	14.5157	20.3731	17.161	21.8783	44.2736	26.1882	45.1999	12.8082	63.2195	58.395	30.1816	12.4546	31.3057	28.9797	22.3869	40.7334
ENSSSCG00000017983	PER1	period circadian regulator 1	54.8557	0.684713	0.223906	3.05804	0.00222792	0.0569653	45.2339	16.7861	22.5261	36.0974	39.6775	27.4896	28.3426	30.3936	15.7113	95.4198	53.1208	31.3871	137.453	65.0189	40.0583	85.2504	29.3426	90.5694	47.5256	36.9056	35.1385	63.1475	96.6187	43.5471	36.6715	46.3346	106.657	88.5473	29.9294	90.3999	33.0058	71.7627	69.4129	64.675	46.4216	50.9981	52.9194	106.718	32.158
ENSSSCG00000013644	KRI1	KRI1 homolog	34.6673	0.685431	0.218465	3.13749	0.001704	0.0492878	17.591	13.4289	37.9387	45.7233	16.5323	41.8592	16.2553	23.9642	27.4947	55.3435	38.247	23.2134	21.5835	23.0447	19.3385	30.8352	32.5582	92.007	4.91644	15.0635	22.8272	27.4554	39.0586	34.6143	28.5223	44.6185	35.5523	83.0131	25.6537	51.3636	34.4837	70.054	33.0538	50.3027	32.8348	47.9685	37.7995	28.038	27.8702
ENSSSCG00000004048	TCP1	t-complex 1	52.3523	0.689105	0.203967	3.37851	0.00072879	0.028968	32.6689	31.8936	41.4955	64.9752	62.8227	69.3488	35.0115	53.7733	23.5669	53.4351	42.4966	49.3692	36.3511	66.6649	37.2957	56.229	49.4402	99.195	45.8868	66.2795	46.6804	42.5559	144.928	43.5471	50.2536	36.0381	27.3479	41.5065	40.084	90.3999	38.9173	51.2591	80.4308	83.3588	24.9091	45.9488	44.0995	59.1189	32.158
ENSSSCG00000010035	YWHAH	tyrosine 3-monooxygenase/tryptophan 5-monooxygenase activation protein eta	216.589	0.689324	0.164134	4.19976	2.67195e-05	0.00333037	226.17	208.148	169.539	217.787	247.984	188.054	117.122	101.117	164.183	349.236	128.552	93.1804	95.4217	134.153	133.988	228.544	126.615	349.339	262.21	105.821	86.1792	188.756	369.001	249	139.895	274.576	278.949	359.723	168.353	271.2	100.988	471.583	401.052	415.357	140.397	345.373	238.137	148.015	153.286
ENSSSCG00000014088	IQGAP2	IQ motif containing GTPase activating protein 2	21.7577	0.702398	0.243435	2.88537	0.0039096	0.0757519	12.565	8.39305	24.8973	15.6422	13.2258	37.4858	30.8434	30.9781	40.8493	11.4504	14.8738	19.9439	15.9036	18.1065	11.0506	38.0906	30.1465	31.6274	8.19407	20.7123	29.4958	15.1005	38.0308	20.0986	10.8656	10.2966	27.3479	33.2052	26.1882	22.6	43.8435	11.9604	29.7484	15.8094	24.9091	16.6627	8.81989	21.0828	7.50353
ENSSSCG00000000406	PTGES3	prostaglandin E synthase 3	115.878	0.702726	0.178794	3.93038	8.48127e-05	0.00719554	174.653	147.718	68.7639	123.934	122.339	129.326	65.4381	55.5268	71.4863	211.832	100.929	61.4663	99.9656	186.003	77.354	143.293	64.3125	258.77	167.159	115.989	62.0695	95.4077	290.884	88.2107	73.3431	126.991	134.005	146.656	72.1511	160.254	70.9379	126.439	124.502	133.662	58.8761	80.2841	80.639	75.8547	71.8195
ENSSSCG00000022404	SLC3A2	solute carrier family 3 member 2	115.236	0.705091	0.152332	4.62865	3.68063e-06	0.000788177	82.9289	94.0021	68.7639	104.682	94.7852	54.3545	74.6077	56.6958	57.3461	242.366	69.057	56.2352	69.2943	94.6477	77.354	134.224	67.5281	156.699	93.4124	47.0735	39.2423	104.331	190.154	107.193	108.656	114.979	98.4525	290.546	97.8049	133.545	55.6665	273.382	283.161	179.653	122.281	152.994	123.479	100.415	122.2
ENSSSCG00000025114	FMNL3	formin like 3	24.0358	0.70548	0.197386	3.57411	0.000351427	0.0182887	18.8475	15.1075	16.5982	26.4714	34.1667	31.863	32.9274	30.9781	33.7792	28.6259	12.749	22.5595	12.4957	23.8677	20.7198	32.6491	26.5289	17.2513	9.83289	30.8802	32.3172	30.201	47.2815	8.93273	29.8805	15.4449	16.4087	19.3697	34.7394	16.4363	28.0796	32.4641	19.8323	37.3678	11.3223	27.7712	13.8598	24.9951	11.7913
ENSSSCG00000023920	P3H1	prolyl 3-hydroxylase 1	85.2307	0.707465	0.245784	2.8784	0.00399698	0.0766785	65.3379	47.0011	40.3099	68.585	87.0701	61.8516	62.9373	53.7733	80.913	190.84	29.7476	48.0614	63.6144	54.3196	42.8209	150.549	60.2929	21.5641	67.1914	70.422	51.5536	37.7512	89.4237	93.7937	73.3431	116.695	27.3479	207.533	65.7377	156.145	44.8288	191.367	180.694	195.462	55.4794	117.649	84.419	104.327	63.244
ENSSSCG00000010568	NPM3	nucleophosmin/nucleoplasmin 3	23.924	0.712271	0.259102	2.74899	0.00597784	0.0941534	23.8735	21.8219	8.2991	15.6422	23.1452	12.4953	22.0906	19.8728	10.9979	57.2519	13.8114	16.3474	42.031	6.58419	6.9066	41.7183	16.882	27.3146	19.6658	15.0635	24.6226	15.7869	27.7522	26.7982	20.3731	36.0381	38.2871	60.8762	13.8958	18.4909	13.3008	47.8418	36.3591	20.1211	14.719	34.8403	22.6797	20.2134	18.2228
ENSSSCG00000007280	ITCH	itchy E3 ubiquitin protein ligase	168.373	0.712719	0.19815	3.59687	0.000322073	0.0172045	105.546	120.86	118.559	166.048	175.242	63.1012	52.934	74.8151	43.206	456.107	141.301	49.3692	147.676	89.7096	113.268	277.517	46.2246	198.39	150.771	56.4882	39.4988	121.49	326.859	218.852	116.806	147.584	213.314	431.668	67.3411	295.854	53.696	413.49	242.394	314.751	149.455	172.182	223.017	162.142	209.027
ENSSSCG00000025228	TRAF3IP1	TRAF3 interacting protein 1	39.4273	0.716077	0.229521	3.11987	0.00180931	0.0512297	36.4384	40.2866	35.5676	38.5039	39.6775	21.242	22.9242	25.1332	31.4225	89.6946	11.6866	30.4062	27.2633	18.1065	13.8132	34.4629	18.4898	43.1283	57.3585	20.7123	12.3113	26.7691	46.2537	31.2646	31.2387	46.3346	54.6958	102.383	28.326	51.3636	25.6165	121.313	59.4968	51.74	26.0414	70.6904	30.2396	38.4707	26.7983
ENSSSCG00000016340	ASB1	ankyrin repeat and SOCS box containing 1	379.778	0.721526	0.199486	3.61693	0.000298116	0.0161295	299.046	399.509	317.737	427.152	337.259	178.682	137.545	171.841	209.745	929.389	329.349	144.184	223.787	214.809	230.681	674.748	105.312	559.23	493.283	105.821	88.4875	186.011	699.972	412.022	298.805	396.419	388.34	835.665	156.595	669.781	96.5543	784.263	667.686	878.142	309.1	410.004	481.314	306.897	256.192
ENSSSCG00000033180	PSMD10	proteasome 26S subunit, non-ATPase 10	30.3624	0.723157	0.253955	2.84758	0.00440536	0.0813099	23.8735	28.5364	37.9387	13.2357	18.7366	20.6172	30.4266	11.1054	22.7813	59.1603	8.49932	11.1163	35.2151	19.7526	20.7198	41.7183	17.284	46.0035	37.6927	8.66153	9.23348	24.0235	15.4179	26.7982	12.2238	29.1737	82.0437	85.7802	26.1882	65.7454	9.35986	56.385	36.3591	38.805	16.9835	57.5622	32.7596	24.7778	21.4386
ENSSSCG00000013478	DOHH	deoxyhypusine hydroxylase	91.2761	0.725168	0.236471	3.06663	0.00216488	0.0560425	59.0554	102.395	47.4234	72.1947	49.5969	54.3545	65.8549	40.9145	73.843	152.672	42.4966	39.5608	115.869	21.3986	42.8209	94.3196	53.0578	156.699	126.189	24.8548	19.4929	74.8161	121.287	102.726	46.179	123.559	147.679	262.875	68.9444	108.891	27.0943	182.824	167.472	189.713	67.934	174.201	83.159	72.8119	82.5388
ENSSSCG00000009956	GRK3	G protein-coupled receptor kinase 3	18.9172	0.72612	0.216258	3.35765	0.000786067	0.0302906	23.8735	11.7503	7.11351	20.4552	6.61292	31.2382	20.8402	25.7177	18.8535	17.1756	19.1235	20.2708	20.4475	21.3986	19.3385	47.1598	21.3035	11.5009	19.6658	16.5699	19.7494	19.2188	27.7522	17.8655	19.0149	5.14829	27.3479	19.3697	18.1714	20.5454	23.1533	22.2123	26.443	10.0605	10.1901	18.1775	11.3399	11.9542	9.64739
ENSSSCG00000040205	TLCD2	TLC domain containing 2	10.598	0.733213	0.267585	2.74011	0.00614181	0.0952499	8.79549	16.7861	7.11351	12.0325	11.0215	8.12193	6.66885	5.26043	8.6412	20.9924	5.31208	2.94254	9.08778	4.93814	6.9066	12.6969	4.42148	28.7522	8.19407	3.38929	4.61674	14.4141	5.13929	4.46637	6.79103	6.86439	10.9392	35.9723	6.94789	16.4363	4.43362	25.6295	7.71254	15.8094	7.92563	13.6331	18.8998	2.82553	11.7913
ENSSSCG00000003144	DHDH	BCL2 associated X, apoptosis regulator	24.7218	0.744879	0.194694	3.8259	0.000130293	0.00946358	28.8995	23.5005	20.1549	26.4714	20.9409	10.621	14.5881	19.2883	21.2102	47.7099	21.2483	20.9247	27.2633	18.1065	20.7198	27.2076	21.3035	34.5026	9.83289	17.6996	16.6716	34.3193	72.978	23.4484	17.6567	18.8771	30.0827	24.9039	19.7748	22.6	16.7492	32.4641	26.443	38.805	24.9091	31.3057	32.7596	14.345	12.8632
ENSSSCG00000005636	SLC25A25	solute carrier family 25 member 25	34.1808	0.751231	0.209972	3.57776	0.000346549	0.0181283	27.643	23.5005	33.1964	40.9103	25.3495	24.3658	32.9274	28.6401	25.138	34.3511	21.2483	35.3105	65.8864	33.744	8.28793	43.5321	28.9406	60.3796	16.3881	27.1143	26.931	28.1418	63.7273	25.6816	24.4477	27.4576	32.8175	47.0407	33.1361	45.1999	36.9468	78.5972	33.0538	56.0516	7.92563	38.8797	26.4597	33.6891	30.0141
ENSSSCG00000033037	SLC25A37	solute carrier family 25 member 37	437.349	0.753061	0.244013	3.08615	0.00202766	0.0540138	291.508	377.687	265.571	626.891	400.082	160.564	107.118	140.278	155.542	1057.25	453.651	108.874	328.296	271.598	222.393	607.636	73.9593	621.047	626.027	91.5109	68.4816	227.194	1244.74	518.098	400.671	430.741	377.401	1026.59	172.094	754.017	58.6223	1037.14	890.248	863.77	354.389	446.864	438.475	395.14	364.457
ENSSSCG00000024059	VAT1	vesicle amine transport 1	66.0937	0.754957	0.210675	3.58352	0.000338995	0.0178255	54.0294	102.395	35.5676	95.0564	95.8873	35.6115	36.6787	34.4851	32.2081	112.595	79.6812	31.714	55.6626	59.2577	78.7353	123.341	37.3816	165.325	29.4987	31.6334	28.7264	106.39	102.786	37.9641	29.8805	12.0127	79.3089	69.1776	42.2218	67.7999	43.8435	75.1799	128.91	140.848	78.1241	30.2959	30.2396	41.0789	106.121
ENSSSCG00000011570	IRAK2	interleukin 1 receptor associated kinase 2	15.3969	0.755731	0.234942	3.21667	0.00129688	0.0417434	15.078	15.1075	17.7838	19.2519	17.6345	5.62288	2.91762	5.84493	8.6412	43.8931	12.749	9.15456	7.95181	9.87628	8.28793	38.0906	6.8332	28.7522	11.4717	6.77859	3.33431	19.2188	18.5015	13.3991	12.2238	13.7288	24.6131	16.6026	12.2924	18.4909	8.37461	37.59	14.3233	27.3072	26.0414	10.0986	21.4197	3.69493	7.50353
ENSSSCG00000036967	ARL8A	ADP ribosylation factor like GTPase 8A	22.2087	0.75643	0.214731	3.52269	0.000427185	0.0204331	22.617	28.5364	13.0414	22.8617	36.3711	31.863	33.761	22.2107	24.3525	51.5267	14.8738	24.5211	28.3993	16.4605	16.5759	23.5799	24.9211	18.6889	16.3881	25.2314	26.6745	28.8282	32.8915	8.93273	13.5821	6.86439	30.0827	16.6026	14.4302	18.4909	28.5722	25.6295	31.952	17.2467	7.92563	15.6529	6.29992	23.691	15.0071
ENSSSCG00000023890	ATG2A	autophagy related 2A	149.96	0.757721	0.191277	3.96139	7.45157e-05	0.00665761	66.5944	122.538	80.6198	152.812	119.033	114.957	100.866	85.9204	84.8408	339.694	141.301	97.7576	199.931	92.1787	59.3968	252.123	78.7828	173.951	98.3289	100.926	79.767	164.733	336.11	159.673	97.7908	128.707	150.414	254.573	90.3225	242.436	70.9379	218.705	232.478	250.076	177.761	186.825	171.358	179.965	93.2581
ENSSSCG00000012277	TIMP1	TIMP metallopeptidase inhibitor 1	61.6762	0.766808	0.221849	3.45644	0.000547364	0.0241318	55.2859	92.3235	27.2685	92.6499	104.705	7.49717	16.6721	17.5348	7.85563	146.946	92.4301	13.4049	32.9432	75.7182	59.3968	126.969	21.3035	148.074	52.4421	13.5572	14.6197	78.9344	65.783	24.565	40.7462	27.4576	65.635	60.8762	16.0336	131.491	15.764	107.644	191.712	116.415	103.033	17.1677	36.5396	16.3012	69.6756
ENSSSCG00000009410	RUBCNL	rubicon like autophagy enhancer	30.4323	0.76874	0.21069	3.64868	0.000263587	0.0151203	30.1559	18.4647	20.1549	46.9266	19.8388	26.8648	26.2586	30.9781	15.7113	62.9771	19.1235	38.5799	17.0396	31.2749	30.3891	58.0428	26.5289	56.0668	29.4987	13.9338	30.7783	32.9465	33.9193	23.4484	27.1641	32.6059	10.9392	19.3697	27.2571	34.9272	35.9616	18.795	58.395	60.3633	10.1901	28.7811	22.6797	26.2992	33.2299
ENSSSCG00000012534	MORF4L2	mortality factor 4 like 2	40.2387	0.773015	0.219511	3.52153	0.000429063	0.0204331	49.0034	26.8577	35.5676	57.7558	12.1237	59.3526	29.593	32.1471	14.9257	53.4351	36.1221	42.5033	39.759	46.9124	29.0077	39.9044	25.725	58.942	57.3585	55.3585	32.3172	41.1832	66.8108	27.9148	21.7313	27.4576	60.1654	85.7802	30.4638	14.3818	25.6165	42.7159	46.2753	71.8611	27.1736	49.4833	37.7995	42.8177	15.0071
ENSSSCG00000012123	RAB9A	RAB9A, member RAS oncogene family	21.4719	0.773253	0.24168	3.19949	0.00137669	0.0434344	32.6689	8.39305	24.8973	24.0649	16.5323	16.2439	17.0889	15.7813	27.4947	32.4427	26.5604	15.3666	24.9914	13.9914	22.1011	45.3459	16.4801	38.8155	26.221	13.1806	19.7494	15.1005	25.6965	11.1659	21.7313	3.4322	24.6131	11.0684	20.3092	14.3818	9.35986	54.6763	36.3591	25.87	12.4546	16.1578	8.81989	30.6462	17.1509
ENSSSCG00000036423	CCDC50	coiled-coil domain containing 50	78.3527	0.775896	0.193705	4.00556	6.18706e-05	0.00583695	87.9549	77.216	100.775	119.121	100.296	54.3545	60.8532	67.2167	55.775	83.9694	74.3691	93.8343	35.2151	63.3728	60.7781	154.176	51.8519	70.4429	50.8032	41.4247	48.7323	51.479	135.677	70.3453	61.1192	27.4576	41.0219	121.752	64.1343	164.363	61.578	99.1008	193.915	149.471	41.8926	57.5622	59.2193	32.385	70.7475
ENSSSCG00000017473	TOP2A	DNA topoisomerase II alpha	28.0429	0.781228	0.261254	2.99031	0.00278698	0.0642045	22.617	23.5005	13.0414	43.3168	28.656	4.99811	7.50245	12.8588	6.28451	74.4274	20.1859	12.0971	17.0396	24.6907	5.52528	36.2768	6.43125	18.6889	29.4987	7.90835	7.43808	35.0057	72.978	31.2646	39.3879	29.1737	21.8783	58.1091	10.1546	59.5817	5.91149	46.1331	29.7484	89.1077	37.3637	27.7712	37.7995	22.1696	17.1509
ENSSSCG00000013746	CALR	calreticulin	438.579	0.785641	0.188053	4.17776	2.94397e-05	0.0034882	307.842	335.722	253.715	445.201	322.931	198.05	222.573	189.376	245.096	824.427	297.476	219.056	508.916	289.704	212.723	593.125	237.554	756.183	558.836	173.607	220.834	349.371	712.306	509.166	258.059	569.744	713.78	979.554	252.796	573.217	235.967	1033.72	586.153	771.788	304.571	519.574	413.275	615.967	292.637
ENSSSCG00000029239	MZB1	marginal zone B and B1 cell specific protein	24.0702	0.786135	0.278882	2.81888	0.00481917	0.0850247	28.8995	21.8219	13.0414	14.4389	7.71507	21.242	34.5947	23.3797	28.2803	59.1603	21.2483	47.4075	14.7676	25.5137	13.8132	29.0214	32.5582	23.0018	22.9434	18.0762	35.1385	22.6507	38.0308	11.1659	24.4477	13.7288	2.73479	13.8355	22.9815	45.1999	50.2477	27.3382	42.9699	7.18611	21.5124	27.2663	6.29992	15.4318	9.64739
ENSSSCG00000035432	HDGFL3	HDGF like 3	10.3043	0.789821	0.290471	2.7191	0.0065459	0.0985582	15.078	23.5005	4.74234	16.8454	7.71507	11.2458	15.4217	11.6899	9.42676	3.81679	6.37449	11.4432	4.54389	7.40721	8.28793	12.6969	10.4508	1.43761	3.27763	9.03812	16.1586	13.0413	13.3622	15.6323	6.79103	15.4449	27.3479	11.0684	5.87898	12.3273	8.37461	15.3777	8.81433	14.3722	1.13223	4.54438	6.29992	7.17251	4.28773
ENSSSCG00000013757	C19orf53	chromosome 2 C19orf53 homolog	24.7227	0.792081	0.210971	3.75445	0.000173723	0.0119744	17.591	23.5005	5.92793	27.6746	19.8388	29.9887	17.5057	16.3658	29.8514	22.9008	9.56174	28.7715	19.3115	13.9914	17.9572	34.4629	36.1758	25.877	24.5822	28.6207	31.0348	26.0827	37.0029	15.6323	21.7313	20.5932	32.8175	83.0131	30.9983	26.7091	28.5722	22.2123	18.7305	18.6839	22.6447	28.2762	8.81989	21.9522	18.2228
ENSSSCG00000013400	MICAL2	microtubule associated monooxygenase, calponin and LIM domain containing 2	40.2931	0.792174	0.25995	3.04741	0.00230821	0.0578204	37.6949	16.7861	28.454	37.3006	33.0646	23.1163	17.9225	11.6899	15.7113	112.595	40.3718	22.5595	46.5749	20.5756	20.7198	72.5535	18.4898	50.3163	77.0243	8.28494	12.8243	35.0057	66.8108	55.8296	16.2985	56.6312	35.5523	94.0815	18.7058	47.2545	11.3304	75.1799	62.8021	107.792	19.248	50.4931	28.9797	35.8626	28.9422
ENSSSCG00000015850	DUSP4	dual specificity phosphatase 4	16.1151	0.793237	0.281197	2.82093	0.0047884	0.084665	16.3345	13.4289	15.4126	25.2682	14.328	4.37335	8.33606	8.76739	5.49894	1.9084	15.9362	7.51982	22.7194	11.5223	6.9066	45.3459	4.01953	24.4394	27.8598	7.90835	2.56486	11.6686	16.4457	6.69955	10.8656	17.161	24.6131	55.342	3.20672	32.8727	3.94099	23.9209	36.3591	38.805	16.9835	8.0789	10.0799	2.82553	18.2228
ENSSSCG00000017137	METRNL	meteorin like, glial cell differentiation regulator	34.2164	0.795147	0.275633	2.8848	0.00391665	0.0757519	47.7469	23.5005	14.227	61.3655	54.0055	23.741	17.9225	20.4572	27.4947	116.412	46.7463	16.0205	29.5353	37.8591	29.0077	58.0428	16.882	73.3181	14.7493	16.9465	12.3113	50.7926	93.5352	5.58296	13.5821	17.161	38.2871	2.7671	22.9815	30.8181	22.6607	32.4641	31.952	45.9911	47.5538	9.5937	39.0595	29.5594	41.8054
ENSSSCG00000013033	BAD	BCL2 associated agonist of cell death	22.1488	0.799353	0.242361	3.29819	0.000973093	0.0349621	37.6949	8.39305	11.8559	20.4552	24.2474	20.6172	11.2537	14.0278	41.6349	55.3435	15.9362	15.0396	20.4475	7.40721	17.9572	16.3245	13.2644	38.8155	21.3046	18.0762	14.3632	17.846	30.8358	8.93273	20.3731	29.1737	16.4087	22.1368	16.568	24.6545	29.0648	52.9677	35.2573	20.1211	19.248	30.8008	7.55991	22.3869	15.0071
ENSSSCG00000015286	DSTYK	dual serine/threonine and tyrosine protein kinase	68.4537	0.800549	0.255582	3.13226	0.00173464	0.0495527	43.9774	63.7872	21.3405	70.9915	36.3711	28.1144	34.5947	23.9642	26.7092	169.847	36.1221	26.8098	56.7986	66.6649	45.5836	136.038	28.1367	99.195	113.078	16.9465	20.7753	37.7512	157.262	99.3766	44.8208	87.521	125.8	77.4789	26.1882	71.909	27.5869	134.982	102.467	148.034	62.2728	101.996	78.1191	79.5497	40.7334
ENSSSCG00000013238	SLC39A13	solute carrier family 39 member 13	19.2164	0.801049	0.258889	3.09418	0.00197358	0.0537068	15.078	6.71444	18.9694	14.4389	9.91938	22.4915	28.3426	26.3022	18.8535	30.5343	24.4356	19.6169	18.1756	9.87628	12.4319	29.0214	28.1367	34.5026	21.3046	15.8167	19.2364	20.5916	38.0308	13.3991	5.43282	30.8898	32.8175	22.1368	26.1882	2.05454	22.1681	18.795	27.5448	5.74888	2.26447	17.6726	10.0799	19.7787	9.64739
ENSSSCG00000032261	CCDC117	coiled-coil domain containing 117	47.3542	0.801554	0.238573	3.35978	0.000780043	0.0302906	66.5944	25.1791	26.0829	60.1623	30.8603	83.0936	39.1795	38.5765	25.138	64.8855	49.9335	36.2913	28.3993	88.8866	22.1011	25.3937	48.2343	84.819	72.1078	83.9792	37.9599	69.325	82.2287	23.4484	39.3879	17.161	38.2871	58.1091	31.5327	94.509	41.3804	42.7159	45.1735	66.1122	37.3637	21.712	21.4197	45.8606	33.2299
ENSSSCG00000031888	DDIT4	DNA damage inducible transcript 4	116.263	0.802266	0.201687	3.97778	6.95605e-05	0.00641208	118.111	77.216	62.836	155.219	162.017	49.9811	49.1828	53.1888	77.7708	270.992	60.5577	46.7537	112.461	145.675	55.2528	137.852	62.3027	181.139	155.687	73.4347	56.4268	120.118	308.358	151.856	92.3579	66.9278	131.27	110.684	41.1529	135.6	61.578	223.831	221.46	204.085	108.694	81.7989	115.919	131.279	63.244
ENSSSCG00000002959	FAM98C	family with sequence similarity 98 member C	12.1013	0.803118	0.287794	2.7906	0.00526104	0.0883442	22.617	5.03583	3.55676	12.0325	14.328	5.62288	4.58483	6.42942	6.28451	13.3588	10.6242	2.94254	15.9036	13.9914	11.0506	32.6491	9.64687	34.5026	3.27763	10.5445	6.92511	17.846	12.3343	6.69955	8.14923	22.3093	21.8783	16.6026	10.1546	8.21817	10.8377	13.6691	9.91613	20.1211	13.5868	8.58383	1.25998	5.65107	18.2228
ENSSSCG00000027314	CAMSAP2	calmodulin regulated spectrin associated protein family member 2	32.0572	0.804979	0.238425	3.37623	0.000734865	0.0290949	28.8995	33.5722	42.6811	57.7558	14.328	13.7448	32.5106	13.4433	20.4246	40.0763	28.6852	32.041	12.4957	12.3454	22.1011	65.2982	32.5582	46.0035	34.4151	19.9592	26.418	32.9465	65.783	36.8475	28.5223	32.6059	24.6131	55.342	14.4302	49.309	24.6312	68.3454	24.2394	25.87	27.1736	53.5227	15.1198	16.5185	24.6544
ENSSSCG00000001095	GMNN	geminin DNA replication inhibitor	13.9327	0.80627	0.278553	2.8945	0.00379769	0.0747397	18.8475	8.39305	2.37117	26.4714	24.2474	7.49717	16.2553	8.76739	7.85563	36.2595	6.37449	7.51982	15.9036	8.23024	11.0506	19.9522	11.2547	10.0633	11.4717	11.6742	11.5419	14.4141	16.4457	12.2825	6.79103	18.8771	10.9392	5.5342	6.94789	12.3273	19.705	32.4641	30.8502	17.2467	19.248	8.0789	7.55991	16.3012	5.35966
ENSSSCG00000026748	PLK1	polo like kinase 1	19.8485	0.80852	0.243725	3.31735	0.000908753	0.0336072	18.8475	11.7503	15.4126	9.62596	16.5323	12.4953	8.75286	10.5209	18.8535	26.7175	12.749	13.7318	29.5353	15.6375	9.66925	21.7661	16.4801	20.1265	6.55526	5.64882	7.69457	25.3963	53.4487	21.2152	5.43282	6.86439	30.0827	41.5065	8.01679	26.7091	16.2566	47.8418	39.6645	30.1816	20.3802	26.2564	23.9397	14.9971	26.7983
ENSSSCG00000032154	ERF	ETS2 repressor factor	37.1953	0.809889	0.180942	4.47596	7.60692e-06	0.00144365	42.7209	31.8936	23.7117	39.7071	46.2904	59.3526	32.0938	30.3936	36.9215	34.3511	23.3731	25.8289	32.9432	26.3368	27.6264	29.0214	32.9601	48.8787	26.221	25.608	30.2653	31.5738	54.4765	26.7982	31.2387	22.3093	82.0437	35.9723	36.8772	71.909	30.0501	92.2663	38.5627	43.1166	28.3058	42.4142	12.5998	42.1657	21.4386
ENSSSCG00000031513	HRAS	HRas proto-oncogene, GTPase	12.8644	0.813225	0.28647	2.83878	0.00452866	0.0824737	11.3085	5.03583	3.55676	20.4552	7.71507	6.8724	11.6705	12.8588	19.6391	36.2595	6.37449	10.7893	12.4957	9.87628	13.8132	10.883	29.7445	12.9385	14.7493	16.1933	11.2854	15.7869	23.6408	14.5157	8.14923	1.7161	5.46958	2.7671	18.7058	10.2727	15.764	13.6691	6.61075	20.1211	10.1901	21.2071	3.77995	13.0409	11.7913
ENSSSCG00000015273	ATP2B4	ATPase plasma membrane Ca2+ transporting 4	84.1948	0.81389	0.154207	5.27789	1.30678e-07	6.2825e-05	66.5944	53.7155	60.4648	75.8045	63.9249	78.0955	55.8516	64.2942	54.9894	169.847	54.1832	53.6196	60.2065	59.2577	56.6342	121.527	59.0871	71.8805	67.1914	66.6561	63.6084	52.1653	149.04	77.0448	74.7013	63.4956	95.7177	118.985	56.1175	172.582	60.1001	210.162	134.419	137.973	81.5208	85.8383	84.419	101.502	50.3808
ENSSSCG00000030305	SLC15A2	solute carrier family 15 member 2	29.5798	0.815768	0.222853	3.66057	0.000251652	0.014686	49.0034	13.4289	17.7838	33.6909	24.2474	29.9887	30.8434	27.4712	35.3503	43.8931	31.8725	31.3871	27.2633	28.8058	34.533	32.6491	26.5289	20.1265	22.9434	33.8929	32.8302	25.3963	40.0865	15.6323	28.5223	29.1737	19.1435	27.671	33.1361	59.5817	29.5574	15.3777	45.1735	54.6144	9.05787	44.9389	2.51997	34.7758	10.7193
ENSSSCG00000002313	SLC10A1	solute carrier family 10 member 1	15.3103	0.818484	0.226168	3.61891	0.000295842	0.0161295	11.3085	11.7503	5.92793	12.0325	9.91938	9.99622	17.5057	14.6123	21.2102	32.4427	10.6242	21.5786	10.2237	9.05326	8.28793	16.3245	14.8723	14.3761	1.63881	12.4274	16.6716	17.1597	18.5015	14.5157	14.9403	15.4449	5.46958	33.2052	16.0336	14.3818	27.5869	32.4641	16.5269	20.1211	11.3223	17.6726	6.29992	21.9522	10.7193
ENSSSCG00000012581	NXT2	nuclear transport factor 2 like export factor 2	23.8174	0.820241	0.244183	3.35912	0.000781899	0.0302906	31.4124	18.4647	15.4126	26.4714	11.0215	24.3658	9.16967	8.76739	14.9257	38.1679	23.3731	14.0588	15.9036	37.8591	24.8638	32.6491	12.0586	54.6292	39.3315	19.5826	14.1067	45.9879	64.7551	10.0493	14.9403	22.3093	32.8175	38.7394	13.8958	12.3273	11.3304	11.9604	20.934	44.5539	22.6447	15.1479	13.8598	26.7339	19.2948
ENSSSCG00000031741	-	ribonucleotide reductase regulatory subunit M2	56.0864	0.832247	0.238372	3.49138	0.000480527	0.0223567	52.7729	62.1085	35.5676	52.9428	69.4357	25.6153	19.5897	14.0278	18.8535	89.6946	32.9349	9.15456	24.9914	29.6289	19.3385	72.5535	16.0781	58.942	55.7197	11.2976	6.66862	37.7512	150.067	83.7444	40.7462	56.6312	73.8394	113.451	28.326	152.036	9.35986	126.439	157.556	129.35	36.2315	59.5819	69.2992	42.1657	42.8773
ENSSSCG00000003155	PPP1R15A	protein phosphatase 1 regulatory subunit 15A	109.927	0.837821	0.2638	3.17597	0.00149336	0.0455189	111.828	57.0727	81.8054	96.2596	63.9249	43.1087	39.5963	34.4851	43.206	274.809	72.2443	28.4445	149.948	69.957	46.9649	181.384	34.166	168.2	132.744	30.5036	16.928	91.9757	181.931	126.175	55.6864	149.301	213.314	174.327	51.8419	164.363	30.0501	271.673	167.472	194.025	81.5208	123.203	104.579	228.434	99.6897
ENSSSCG00000040386	GINS2	GINS complex subunit 2	27.2448	0.839599	0.227307	3.69368	0.000221031	0.0136903	37.6949	48.6797	13.0414	30.0811	20.9409	43.1087	27.9258	35.6541	42.4204	28.6259	24.4356	28.4445	17.0396	10.6993	31.7704	27.2076	30.5484	46.0035	14.7493	45.1906	32.0607	19.9052	66.8108	14.5157	29.8805	3.4322	21.8783	30.4381	30.9983	30.8181	27.5869	25.6295	17.6287	21.5583	7.92563	20.1973	11.3399	32.8197	12.8632
ENSSSCG00000006340	UAP1	UDP-N-acetylglucosamine pyrophosphorylase 1	15.7983	0.840134	0.304288	2.76098	0.00576282	0.092256	15.078	1.67861	4.74234	32.4876	27.5538	11.2458	7.50245	12.2743	17.2824	38.1679	22.3107	9.48151	9.08778	17.2835	22.1011	29.0214	9.64687	21.5641	11.4717	12.4274	9.48997	24.7099	26.7243	1.11659	5.43282	6.86439	8.20437	0	14.9647	20.5454	11.823	15.3777	26.443	41.6794	15.8513	10.0986	7.55991	13.2583	23.5825
ENSSSCG00000039472	SLC30A1	solute carrier family 30 member 1	44.0347	0.84248	0.271302	3.10532	0.00190071	0.0524306	23.8735	31.8936	16.5982	57.7558	31.9624	11.8705	19.5897	21.6262	16.4968	95.4198	16.9986	16.3474	46.5749	37.0361	15.1945	67.112	18.8918	37.3778	42.6092	25.9846	21.0318	45.9879	97.6466	65.8789	32.5969	51.4829	54.6958	83.0131	17.6369	63.6908	16.7492	93.9749	60.5986	74.7355	26.0414	88.8679	59.2193	90.8518	21.4386
ENSSSCG00000014136	VCAN	X-ray repair cross complementing 4	161.353	0.844558	0.218126	3.87189	0.000107994	0.008452	119.367	167.861	133.971	365.787	229.248	45.6078	68.7725	45.5904	49.4905	118.321	183.798	28.4445	132.909	184.357	171.284	482.481	48.2343	368.028	140.938	47.0735	53.6055	247.785	298.079	139.574	93.7162	94.3854	344.584	118.985	66.2722	232.163	67.9821	83.7231	391.136	360.743	138.132	41.4044	95.7589	86.2875	206.883
ENSSSCG00000044913	-	-	83.6293	0.845271	0.233525	3.61961	0.000295045	0.0161295	66.5944	58.7513	47.4234	62.5688	33.0646	64.9754	55.018	52.0199	31.4225	74.4274	127.49	21.9056	43.1669	69.134	63.5408	195.894	34.5679	115.009	78.6631	50.0862	28.7264	96.7804	145.956	55.8296	38.0297	66.9278	84.7785	135.588	37.9462	160.254	25.1238	205.036	153.149	194.025	47.5538	175.716	78.1191	76.9415	109.337
ENSSSCG00000006539	SHC1	SHC adaptor protein 1	80.7735	0.850601	0.179905	4.72806	2.26678e-06	0.00054489	56.5424	57.0727	55.7225	98.6661	60.6184	46.8573	61.6868	39.7455	60.4884	158.397	66.9322	55.9082	120.413	69.957	52.4902	139.666	55.0675	145.199	65.5526	59.8775	42.3201	74.8161	84.2844	53.5964	39.3879	44.6185	147.679	124.52	59.3243	123.273	42.3657	111.061	106.874	150.908	73.5952	135.827	51.6594	98.2417	58.9563
ENSSSCG00000017986	NDEL1	nudE neurodevelopment protein 1 like 1	209.152	0.862356	0.18771	4.59409	4.3464e-06	0.000895537	125.65	137.646	94.8468	227.413	220.431	114.332	91.6967	95.2723	95.8387	311.069	161.487	76.179	293.081	135.799	124.319	364.581	75.9691	306.211	167.159	102.055	79.767	249.158	411.144	212.152	92.3579	145.868	306.297	415.065	90.3225	388.309	79.3125	471.583	376.813	389.487	212.86	320.631	236.877	211.046	146.855
ENSSSCG00000021576	-	CD83 molecule	16.0099	0.864789	0.283012	3.05566	0.00224562	0.057252	15.078	20.1433	10.6703	21.6584	19.8388	6.24764	11.2537	6.42942	0	32.4427	12.749	10.7893	12.4957	16.4605	22.1011	52.6013	13.2644	11.5009	11.4717	3.76588	8.97699	14.4141	37.0029	26.7982	17.6567	12.0127	8.20437	27.671	6.41343	20.5454	11.3304	29.0468	38.5627	17.2467	4.52893	10.6036	8.81989	6.08577	7.50353
ENSSSCG00000034137	PPIB	peptidylprolyl isomerase B	10.961	0.866824	0.291237	2.97635	0.00291699	0.06559	15.078	8.39305	4.74234	9.62596	5.51077	8.12193	10.0033	11.6899	14.9257	19.084	11.6866	11.1163	3.40792	11.5223	9.66925	14.5107	17.284	8.62566	8.19407	23.3485	10.2594	5.49109	12.3343	7.81614	8.14923	5.14829	5.46958	24.9039	11.758	4.10909	14.7787	5.12591	20.934	21.5583	6.7934	16.6627	2.51997	13.9103	3.2158
ENSSSCG00000016981	CPEB4	cytoplasmic polyadenylation element binding protein 4	752.311	0.867533	0.253638	3.42036	0.00062538	0.0263077	515.164	555.62	356.861	853.101	689.948	329.251	215.904	197.559	197.962	1414.12	508.897	154.647	757.693	548.134	312.179	1333.17	194.143	1273.72	1078.34	181.515	132.347	533.322	2103	826.278	526.984	785.973	987.26	1607.69	257.606	1286.14	120.2	1575.36	1258.25	1730.41	627.257	986.131	777.411	1001.76	548.829
ENSSSCG00000016835	SKP2	S-phase kinase associated protein 2	11.217	0.869891	0.31381	2.77203	0.00557077	0.0907136	7.53899	0	7.11351	12.0325	11.0215	19.3677	10.8369	24.5487	6.28451	38.1679	7.43691	18.6361	18.1756	4.93814	2.76264	7.25535	9.24492	7.18805	9.83289	11.6742	18.467	17.1597	8.22287	4.46637	4.07462	6.86439	19.1435	13.8355	9.62015	12.3273	11.3304	11.9604	14.3233	5.74888	1.13223	8.0789	10.0799	14.7797	11.7913
ENSSSCG00000036886	ZNF792	zinc finger protein 792	11.0936	0.870787	0.288925	3.01388	0.00257926	0.0622816	8.79549	5.03583	7.11351	19.2519	9.91938	18.1182	16.6721	11.1054	16.4968	1.9084	5.31208	12.424	6.81583	10.6993	6.9066	7.25535	12.4605	14.3761	6.55526	34.2695	21.8013	14.4141	11.3064	1.11659	5.43282	3.4322	13.674	5.5342	16.568	16.4363	11.823	10.2518	5.50896	14.3722	3.3967	12.1184	7.55991	18.9093	7.50353
ENSSSCG00000001235	TRIM15	tripartite motif containing 15	18.267	0.871538	0.30221	2.88388	0.00392811	0.0758283	16.3345	15.1075	4.74234	10.8292	7.71507	4.37335	11.6705	5.84493	7.85563	59.1603	6.37449	5.23118	23.8554	7.40721	13.8132	34.4629	7.6371	21.5641	19.6658	3.76588	4.36025	13.0413	15.4179	13.3991	23.0895	13.7288	38.2871	49.8078	4.81008	34.9272	5.41886	42.7159	36.3591	17.2467	12.4546	17.1677	36.5396	25.8645	20.3667
ENSSSCG00000003105	SLC1A5	solute carrier family 1 member 5	250.753	0.872591	0.241034	3.6202	0.000294377	0.0161295	129.419	174.575	132.786	216.584	260.108	66.8497	69.6061	54.9423	73.0574	658.397	125.365	58.1969	243.098	229.624	114.65	371.837	47.4304	347.901	267.127	46.6969	51.8101	144.827	486.177	245.65	167.059	181.906	254.336	561.722	98.3393	441.727	49.2624	1100.36	561.914	511.651	233.24	278.217	246.957	269.078	206.883
ENSSSCG00000011600	SLC6A6	solute carrier family 6 member 6	34.306	0.875436	0.233584	3.74784	0.000178362	0.0121671	18.8475	25.1791	18.9694	42.1136	29.7581	64.9754	41.2635	47.3439	64.4162	66.7939	41.4342	30.7332	6.81583	31.2749	19.3385	56.229	45.8226	54.6292	13.1105	32.7632	33.8561	16.4733	31.8636	12.2825	4.07462	12.0127	24.6131	58.1091	40.084	39.0363	46.3067	17.0864	39.6645	53.1772	22.6447	39.3846	37.7995	45.8606	11.7913
ENSSSCG00000048517	-	-	10.1837	0.876666	0.300858	2.91389	0.00356954	0.0717889	6.28249	10.0717	10.6703	4.81298	15.4301	7.49717	2.91762	5.26043	5.49894	20.9924	5.31208	5.88508	2.27194	4.11512	6.9066	9.06919	2.00976	24.4394	3.27763	1.12976	1.28243	19.2188	5.13929	2.23318	0	8.58049	10.9392	30.4381	8.01679	20.5454	9.35986	23.9209	20.934	21.5583	9.05787	7.57397	10.0799	9.7807	24.6544
ENSSSCG00000005970	SQLE	squalene epoxidase	17.3687	0.88107	0.293373	3.00324	0.00267117	0.0627167	18.8475	15.1075	14.227	14.4389	11.0215	11.2458	15.8385	12.2743	5.49894	15.2672	25.498	16.6744	12.4957	24.6907	6.9066	39.9044	18.8918	30.1898	16.3881	16.5699	31.5477	28.8282	35.9751	25.6816	5.43282	18.8771	0	22.1368	7.48234	14.3818	9.85248	11.9604	35.2573	45.9911	12.4546	9.08876	8.81989	4.12963	7.50353
ENSSSCG00000011309	KIF15	kinesin family member 15	11.4878	0.883703	0.309115	2.85882	0.00425222	0.079875	15.078	11.7503	7.11351	6.01623	8.81723	4.37335	1.66721	0.584493	2.35669	34.3511	6.37449	1.96169	13.6317	7.40721	6.9066	16.3245	4.42148	18.6889	13.1105	2.25953	2.30837	4.11832	28.7801	8.93273	10.8656	15.4449	27.3479	16.6026	4.27562	20.5454	2.46312	22.2123	19.8323	28.7444	15.8513	10.6036	8.81989	10.6501	6.43159
ENSSSCG00000013893	ARRDC2	arrestin domain containing 2	235.606	0.884968	0.259472	3.41065	0.000648072	0.0267877	109.315	92.3235	131.6	190.113	203.898	111.208	109.202	84.167	112.336	541.984	128.552	108.547	396.454	153.905	114.65	322.863	118.978	301.898	196.658	80.5899	93.6172	172.969	570.462	226.668	143.97	204.216	306.297	520.215	97.2704	402.69	101.481	500.63	326.13	442.664	155.116	303.969	278.457	615.749	116.841
ENSSSCG00000025448	SERTAD3	SERTA domain containing 3	67.9276	0.891891	0.225653	3.95248	7.73443e-05	0.00681072	55.2859	38.608	53.3513	61.3655	27.5538	37.4858	27.9258	22.7952	40.0637	137.405	73.3067	19.29	94.2857	42.7972	46.9649	76.1812	29.3426	172.513	77.0243	28.2441	22.8272	92.6621	106.897	60.2959	42.1044	63.4956	125.8	132.821	22.447	80.1272	27.0943	160.612	91.4487	123.601	61.1406	74.2249	64.2592	96.9376	38.5896
ENSSSCG00000033120	PALM2AKAP2	Sus scrofa PALM2-AKAP2 fusion (PALM2AKAP2), transcript variant 1, mRNA.	16.5356	0.893514	0.289365	3.08785	0.00201612	0.0539913	21.3605	10.0717	8.2991	30.0811	26.4517	6.24764	16.2553	12.8588	10.9979	24.8091	19.1235	12.424	3.40792	23.8677	8.28793	59.8566	12.4605	17.2513	18.027	9.4147	18.467	10.9822	46.2537	11.1659	16.2985	30.8898	19.1435	13.8355	9.62015	14.3818	14.2861	22.2123	18.7305	7.18611	5.66117	13.1282	11.3399	7.60721	2.14386
ENSSSCG00000005356	DCAF10	DDB1 and CUL4 associated factor 10	54.1155	0.896187	0.188243	4.76079	1.92837e-06	0.000492074	36.4384	67.1444	34.382	55.3493	24.2474	57.4783	46.6819	40.9145	25.9236	82.061	53.1208	44.465	44.3029	27.1598	37.2957	108.83	40.9992	76.1933	36.0539	40.2949	44.372	53.5381	71.9501	46.8968	28.5223	30.8898	57.4306	121.752	39.5495	32.8727	36.4542	102.518	78.2272	125.038	46.4216	89.8778	37.7995	48.4688	38.5896
ENSSSCG00000037910	DUSP6	dual specificity phosphatase 6	11.6038	0.896721	0.322567	2.77996	0.00543659	0.0893938	10.052	5.03583	1.18559	26.4714	18.7366	14.9943	22.5074	16.9503	26.7092	17.1756	10.6242	14.3857	4.54389	2.46907	6.9066	19.9522	13.2644	5.75044	4.91644	8.66153	8.46402	13.0413	5.13929	8.93273	1.35821	6.86439	16.4087	2.7671	16.0336	16.4363	11.3304	1.70864	27.5448	11.4978	13.5868	14.1381	5.03994	12.3889	8.57546
ENSSSCG00000028879	PLOD3	procollagen-lysine,2-oxoglutarate 5-dioxygenase 3	66.6018	0.902281	0.187528	4.81144	1.49843e-06	0.000408869	69.1074	33.5722	34.382	126.341	61.7206	61.8516	38.3459	39.7455	32.2081	91.603	47.8087	39.5608	96.5576	70.78	55.2528	77.995	34.166	142.323	55.7197	62.5136	39.2423	85.7983	174.736	54.713	57.0446	53.199	82.0437	52.5749	37.4117	113	41.873	75.1799	67.2093	112.103	36.2315	52.5129	39.0595	93.0253	58.9563
ENSSSCG00000024119	GLB1	galactosidase beta 1	19.0481	0.903011	0.2988	3.02213	0.00251003	0.0615079	16.3345	33.5722	17.7838	18.0487	8.81723	19.9924	12.5041	6.42942	21.9958	51.5267	11.6866	11.1163	20.4475	9.87628	0	23.5799	22.5094	25.877	6.55526	10.9211	9.23348	13.7277	26.7243	8.93273	12.2238	25.7415	16.4087	71.9447	3.74117	20.5454	11.823	32.4641	34.1555	30.1816	19.248	7.57397	12.5998	16.7359	19.2948
ENSSSCG00000040186	C12orf57	chromosome 5 C12orf57 homolog	27.8189	0.904598	0.223794	4.04211	5.29735e-05	0.00540223	60.3119	6.71444	5.92793	32.4876	22.0431	33.7373	30.0098	29.2246	71.4863	26.7175	16.9986	21.9056	17.0396	10.6993	23.4825	21.7661	59.0871	46.0035	24.5822	38.412	27.444	30.8874	26.7243	25.6816	13.5821	12.0127	35.5523	30.4381	36.3428	16.4363	31.0353	34.1727	30.8502	11.4978	23.7769	36.86	11.3399	31.2982	20.3667
ENSSSCG00000035923	JMJD6	jumonji domain containing 6, arginine demethylase and lysine hydroxylase	35.7943	0.90662	0.258603	3.50584	0.000455164	0.0213737	61.5684	20.1433	11.8559	44.5201	54.0055	39.9849	12.5041	30.3936	37.707	83.9694	38.247	17.3283	28.3993	52.6735	23.4825	38.0906	24.5191	51.7539	47.5256	30.5036	22.3142	43.9287	119.232	13.3991	16.2985	18.8771	24.6131	33.2052	13.3613	49.309	32.5132	34.1727	44.0717	43.1166	28.3058	27.7712	28.9797	43.6871	9.64739
ENSSSCG00000028372	FAM131A	family with sequence similarity 131 member A	8.45896	0.907952	0.332142	2.73363	0.00626412	0.0961133	5.02599	10.0717	8.2991	12.0325	5.51077	13.12	5.00164	7.59841	9.42676	15.2672	3.18725	6.53897	5.67986	14.8144	4.14396	16.3245	4.42148	4.31283	6.55526	8.66153	5.3862	14.4141	11.3064	3.34977	1.35821	6.86439	10.9392	22.1368	15.4991	0	7.38936	15.3777	9.91613	12.935	2.26447	4.54438	2.51997	9.12865	8.57546
ENSSSCG00000010054	ADORA2A	adenosine A2a receptor	19.3867	0.912275	0.24018	3.7983	0.000145693	0.0103586	23.8735	25.1791	21.3405	38.5039	30.8603	1.87429	2.08402	2.92246	5.49894	49.6183	33.9973	1.63474	17.0396	23.0447	6.9066	30.8352	1.20586	74.7557	11.4717	1.50635	1.28243	26.7691	47.2815	15.6323	9.50744	1.7161	27.3479	47.0407	2.67226	12.3273	4.92624	27.3382	28.6466	34.4933	29.4381	1.51479	16.3798	2.60819	15.0071
ENSSSCG00000001488	GCLC	glutamate-cysteine ligase catalytic subunit	44.0744	0.920205	0.220374	4.17565	2.97133e-05	0.0034882	13.8215	20.1433	17.7838	45.7233	37.4732	39.3601	28.3426	38.5765	38.4926	51.5267	20.1859	17.9822	54.5267	21.3986	29.0077	87.0642	34.166	48.8787	40.9704	33.8929	34.1126	39.8104	96.6187	64.7623	31.2387	29.1737	65.635	58.1091	24.0504	71.909	31.5279	99.1008	79.329	54.6144	28.3058	59.077	30.2396	73.0292	28.9422
ENSSSCG00000035847	TAL1	TAL bHLH transcription factor 1, erythroid differentiation factor	378.108	0.922792	0.271318	3.40114	0.000671054	0.0271665	202.296	399.509	226.447	439.185	330.646	106.21	70.8565	91.1809	107.622	877.862	231.607	69.6401	383.959	292.173	194.766	549.593	82.4003	986.2	491.644	64.7732	50.5277	338.388	946.658	414.255	258.059	339.787	486.793	982.321	100.477	729.363	56.1591	823.562	491.399	816.342	271.736	470.091	357.836	415.571	198.307
ENSSSCG00000034768	CYTH3	cytohesin 3	16.7429	0.923676	0.301293	3.0657	0.00217158	0.0560724	23.8735	1.67861	10.6703	37.3006	9.91938	19.3677	16.2553	23.3797	18.8535	11.4504	6.37449	27.7906	20.4475	9.05326	22.1011	7.25535	12.4605	23.0018	9.83289	15.4401	26.6745	15.7869	21.585	12.2825	32.5969	8.58049	30.0827	13.8355	27.2571	20.5454	29.5574	8.54318	26.443	7.18611	2.26447	14.1381	5.03994	19.7787	4.28773
ENSSSCG00000012730	AFF2	AF4/FMR2 family member 2	10.3309	0.923794	0.322733	2.86242	0.00420426	0.0796364	7.53899	6.71444	8.2991	19.2519	6.61292	5.62288	5.83524	8.76739	1.57113	9.54198	13.8114	6.53897	11.3597	5.76117	9.66925	23.5799	5.22539	28.7522	14.7493	7.15517	6.66862	11.6686	20.5572	5.58296	9.50744	17.161	0	13.8355	5.34453	22.6	9.35986	6.83454	29.7484	5.74888	2.26447	14.643	3.77995	6.95516	4.28773
ENSSSCG00000012014	BTG3	BTG anti-proliferation factor 3	8.08219	0.924732	0.312423	2.95987	0.00307768	0.0670471	18.8475	6.71444	5.92793	14.4389	7.71507	1.87429	1.25041	2.92246	2.35669	20.9924	10.6242	1.63474	6.81583	8.23024	4.14396	3.62768	0.401953	11.5009	8.19407	4.14247	1.7954	6.17747	20.5572	2.23318	4.07462	10.2966	2.73479	30.4381	3.20672	16.4363	0.492624	18.795	8.81433	17.2467	4.52893	2.52466	3.77995	4.78167	13.9351
ENSSSCG00000015961	CDCA7	cell division cycle associated 7	7.65461	0.92785	0.31714	2.92567	0.0034371	0.0701934	7.53899	3.35722	4.74234	12.0325	3.30646	9.99622	12.9209	5.26043	4.71338	13.3588	11.6866	7.19287	6.81583	5.76117	6.9066	1.81384	5.62734	15.8137	3.27763	2.63612	7.43808	8.92302	13.3622	6.69955	5.43282	5.14829	2.73479	0	6.41343	12.3273	6.89674	15.3777	26.443	8.62333	4.52893	7.57397	3.77995	4.56433	7.50353
ENSSSCG00000025542	NEMP1	nuclear envelope integral membrane protein 1	22.9772	0.930478	0.273632	3.40047	0.000672705	0.0271665	12.565	8.39305	13.0414	12.0325	34.1667	13.12	16.2553	10.5209	8.6412	30.5343	12.749	14.0588	20.4475	19.7526	11.0506	77.995	12.0586	37.3778	16.3881	16.1933	12.0548	7.55025	57.5601	26.7982	13.5821	20.5932	30.0827	47.0407	12.2924	30.8181	7.38936	29.0468	35.2573	61.8005	23.7769	23.7318	17.6398	27.8207	13.9351
ENSSSCG00000004554	PCLAF	PCNA clamp associated factor	14.6316	0.931331	0.302882	3.0749	0.00210572	0.0556526	10.052	11.7503	13.0414	18.0487	8.81723	4.99811	2.91762	2.92246	7.85563	53.4351	10.6242	1.63474	10.2237	6.58419	15.1945	27.2076	6.43125	12.9385	11.4717	4.14247	1.28243	6.86386	43.1701	8.93273	12.2238	22.3093	13.674	30.4381	4.81008	14.3818	8.86723	37.59	30.8502	31.6189	14.719	5.04931	17.6398	14.1277	11.7913
ENSSSCG00000008289	MTHFD2	methylenetetrahydrofolate dehydrogenase (NADP+ dependent) 2, methenyltetrahydrofolate cyclohydrolase	8.42617	0.933846	0.306257	3.04923	0.00229432	0.0578204	6.28249	5.03583	8.2991	4.81298	3.30646	10.621	6.25205	8.76739	3.14225	13.3588	5.31208	7.51982	7.95181	12.3454	2.76264	12.6969	8.84296	12.9385	3.27763	8.66153	11.0289	10.2958	28.7801	6.69955	4.07462	3.4322	10.9392	2.7671	8.55125	4.10909	9.35986	11.9604	17.6287	10.0605	4.52893	10.0986	11.3399	4.34698	6.43159
ENSSSCG00000037132	POU2F2	POU class 2 homeobox 2	19.3424	0.934938	0.306316	3.0522	0.00227168	0.057481	11.3085	31.8936	5.92793	6.01623	18.7366	18.1182	15.4217	8.1829	20.4246	20.9924	11.6866	10.7893	11.3597	14.8144	9.66925	19.9522	12.4605	43.1283	37.6927	12.4274	8.97699	19.2188	48.3094	10.0493	4.07462	17.161	43.7567	13.8355	14.4302	22.6	6.40411	46.1331	42.9699	33.0561	7.92563	17.6726	11.3399	30.4288	15.0071
ENSSSCG00000001701	HSP90AB1	heat shock protein 90 alpha family class B member 1	592.726	0.941931	0.165524	5.69059	1.26604e-08	1.59775e-05	774.003	574.084	386.501	713.524	530.136	522.303	386.376	274.127	330.722	578.244	361.221	326.949	533.907	666.649	298.365	941.382	346.885	1541.12	786.631	673.34	330.866	750.906	1553.09	491.3	346.342	605.783	743.863	874.404	419.545	710.872	354.689	661.242	641.243	998.869	363.447	512	466.194	453.607	291.566
ENSSSCG00000032434	PLAUR	plasminogen activator, urokinase receptor	17.9574	0.948752	0.31448	3.01689	0.00255383	0.0620525	28.8995	25.1791	5.92793	30.0811	23.1452	9.37146	7.08565	16.9503	8.6412	51.5267	32.9349	4.25033	11.3597	37.0361	9.66925	30.8352	3.21562	53.1915	8.19407	6.77859	9.74645	24.0235	42.1422	6.69955	12.2238	3.4322	13.674	11.0684	11.758	12.3273	10.3451	8.54318	39.6645	34.4933	16.9835	7.06904	3.77995	16.3012	11.7913
ENSSSCG00000011389	AMIGO3	GDP-mannose pyrophosphorylase B	25.7416	0.951371	0.267646	3.55459	0.00037857	0.0192689	5.02599	23.5005	8.2991	21.6584	22.0431	12.4953	30.0098	14.6123	13.3546	87.7862	15.9362	18.6361	19.3115	27.9828	12.4319	39.9044	14.8723	23.0018	19.6658	23.3485	18.9799	15.7869	76.0616	24.565	31.2387	10.2966	16.4087	35.9723	14.4302	32.8727	19.705	56.385	41.8681	43.1166	24.9091	23.2268	13.8598	29.9941	20.3667
ENSSSCG00000002389	VASH1	vasohibin 1	9.41205	0.957132	0.29189	3.27908	0.00104145	0.0366359	11.3085	5.03583	4.74234	20.4552	7.71507	14.9943	5.83524	8.76739	10.2123	11.4504	11.6866	17.3283	14.7676	5.76117	6.9066	3.62768	12.0586	14.3761	9.83289	7.53176	13.0808	9.60941	16.4457	1.11659	1.35821	8.58049	10.9392	5.5342	6.41343	14.3818	11.823	8.54318	16.5269	12.935	6.7934	5.04931	2.51997	6.73781	4.28773
ENSSSCG00000000766	CECR2	cat eye syndrome critical region protein 2	17.0283	0.957308	0.297099	3.22219	0.00127215	0.0414916	20.104	6.71444	4.74234	19.2519	11.0215	14.9943	25.0082	20.4572	15.7113	0	13.8114	18.963	19.3115	5.76117	13.8132	21.7661	33.3621	20.1265	26.221	11.6742	19.2364	28.1418	21.585	23.4484	20.3731	3.4322	30.0827	13.8355	16.568	28.7636	31.0353	15.3777	31.952	7.18611	2.26447	21.712	3.77995	16.0838	6.43159
ENSSSCG00000007987	DECR2	2,4-dienoyl-CoA reductase 2	43.0451	0.962996	0.226209	4.25711	2.07085e-05	0.00286401	37.6949	30.215	18.9694	50.5363	76.0486	23.1163	23.7578	28.0557	18.8535	104.962	29.7476	31.3871	27.2633	18.1065	29.0077	52.6013	21.7055	47.4411	40.9704	19.9592	15.1326	27.4554	100.73	39.0807	19.0149	30.8898	41.0219	127.287	27.7915	49.309	17.2418	119.604	91.4487	60.3633	32.8348	57.0572	39.0595	21.9522	31.086
ENSSSCG00000009216	SPP1	secreted phosphoprotein 1	10.1232	0.963991	0.340812	2.82851	0.00467645	0.0832689	15.078	10.0717	5.92793	25.2682	3.30646	1.87429	2.50082	0	9.42676	20.9924	2.12483	3.26949	4.54389	9.05326	8.28793	19.9522	1.60781	2.87522	4.91644	3.76588	3.84728	5.49109	22.6129	7.81614	20.3731	1.7161	16.4087	35.9723	3.20672	10.2727	4.92624	18.795	20.934	15.8094	7.92563	4.54438	18.8998	3.26023	17.1509
ENSSSCG00000033757	-	FKBP prolyl isomerase 2	15.6486	0.967007	0.26432	3.65847	0.000253723	0.0147218	15.078	0	3.55676	9.62596	11.0215	19.3677	12.0873	16.3658	18.068	43.8931	16.9986	18.963	13.6317	13.9914	2.76264	36.2768	18.0879	18.6889	9.83289	13.5572	12.3113	13.7277	19.5293	14.5157	5.43282	5.14829	8.20437	22.1368	18.1714	24.6545	10.8377	15.3777	18.7305	25.87	22.6447	24.2367	10.0799	18.2573	8.57546
ENSSSCG00000032909	CDCA8	cell division cycle associated 8	13.9178	0.988477	0.308707	3.20199	0.00136481	0.0434093	22.617	6.71444	10.6703	15.6422	19.8388	3.74858	3.33442	2.92246	0.785563	32.4427	13.8114	0.980846	9.08778	13.1684	6.9066	50.7875	4.42148	15.8137	13.1105	1.88294	4.10377	11.6686	26.7243	13.3991	5.43282	15.4449	2.73479	41.5065	6.41343	30.8181	5.91149	35.8813	25.3412	12.935	7.92563	13.6331	11.3399	12.1715	10.7193
ENSSSCG00000002009	PCK2	phosphoenolpyruvate carboxykinase 2, mitochondrial	46.7464	0.995395	0.25057	3.97252	7.11152e-05	0.00641208	27.643	38.608	29.6396	46.9266	38.5754	19.3677	38.3459	22.2107	25.138	152.672	14.8738	25.502	39.759	23.0447	22.1011	99.7611	30.9504	15.8137	50.8032	10.1679	17.1845	38.4376	84.2844	55.8296	35.3133	30.8898	38.2871	74.7118	30.4638	86.2908	13.3008	164.029	84.838	100.605	41.8926	44.434	59.2193	12.6062	38.5896
ENSSSCG00000015014	ZC3H12C	zinc finger CCCH-type containing 12C	8.0409	0.996421	0.319933	3.11446	0.00184281	0.0518245	6.28249	16.7861	8.2991	7.21947	9.91938	7.49717	2.50082	3.50696	3.92782	7.63358	6.37449	4.57728	3.40792	4.93814	2.76264	9.06919	5.22539	21.5641	11.4717	2.25953	4.36025	17.846	17.4736	3.34977	0	10.2966	8.20437	13.8355	6.94789	16.4363	4.43362	1.70864	14.3233	24.4328	5.66117	4.03945	2.51997	4.99902	7.50353
ENSSSCG00000033998	SLC43A3	solute carrier family 43 member 3	24.5476	0.996986	0.258531	3.85635	0.000115095	0.00880301	32.6689	10.0717	10.6703	26.4714	12.1237	24.9906	20.0065	12.2743	21.2102	47.7099	21.2483	17.0013	37.4871	18.1065	13.8132	38.0906	21.7055	66.13	19.6658	24.1016	26.418	21.9644	44.1979	16.7489	13.5821	13.7288	24.6131	30.4381	21.3781	8.21817	34.4837	51.2591	25.3412	15.8094	10.1901	21.712	6.29992	44.3392	31.086
ENSSSCG00000031874	REM2	RRAD and GEM like GTPase 2	11.6864	0.998177	0.28357	3.52004	0.000431481	0.0204518	18.8475	10.0717	8.2991	13.2357	4.40861	15.6191	10.4201	16.3658	14.1401	3.81679	6.37449	9.15456	9.08778	13.1684	8.28793	5.44151	8.44101	14.3761	8.19407	4.89565	10.0029	11.6686	24.6686	10.0493	5.43282	3.4322	32.8175	13.8355	7.48234	22.6	14.2861	18.795	9.91613	15.8094	6.7934	10.6036	5.03994	22.3869	7.50353
ENSSSCG00000031166	ZNF296	zinc finger protein 296	11.5871	1.00315	0.365594	2.74389	0.00607153	0.094596	18.8475	11.7503	13.0414	3.60974	2.20431	9.37146	14.5881	28.6401	12.569	0	20.1859	16.3474	10.2237	2.46907	8.28793	7.25535	16.4801	17.2513	8.19407	10.5445	14.8762	9.60941	19.5293	4.46637	9.50744	1.7161	8.20437	27.671	12.8269	4.10909	13.7935	13.6691	30.8502	18.6839	2.26447	8.58383	1.25998	14.1277	4.28773
ENSSSCG00000015244	APLP2	amyloid beta precursor like protein 2	177	1.00597	0.226485	4.44165	8.92706e-06	0.00159434	126.906	134.289	151.755	147.999	95.8873	43.7335	48.3492	45.5904	55.775	320.611	97.7422	48.7153	207.883	157.198	131.225	281.145	57.8812	372.341	217.962	38.0354	27.9569	216.212	360.779	192.054	104.582	139.004	270.744	547.886	47.5663	254.763	43.8435	500.63	266.634	425.417	116.62	214.596	142.378	151.709	98.6178
ENSSSCG00000015504	CACYBP	calcyclin binding protein	76.9286	1.01033	0.186421	5.4196	5.97327e-08	3.54742e-05	115.598	47.0011	61.6504	74.6012	52.9034	105.585	59.186	43.837	53.4183	152.672	48.8711	51.6579	68.1583	100.409	42.8209	85.2504	59.0871	219.954	70.469	110.717	59.2482	84.4255	163.43	45.7802	55.6864	44.6185	76.5741	121.752	64.6688	71.909	74.3862	83.7231	68.3111	90.5449	37.3637	55.5424	52.9194	83.6793	41.8054
ENSSSCG00000039663	TWSG1	twisted gastrulation BMP signaling modulator 1	7.19243	1.01091	0.369233	2.73787	0.00618393	0.0954633	2.513	0	3.55676	3.60974	9.91938	8.12193	12.0873	14.0278	7.85563	3.81679	9.56174	5.55813	5.67986	6.58419	2.76264	10.883	3.61758	15.8137	1.63881	8.28494	10.0029	15.1005	10.2786	3.34977	8.14923	5.14829	5.46958	5.5342	9.0857	6.16363	11.3304	5.12591	12.1197	17.2467	1.13223	2.52466	1.25998	11.3021	4.28773
ENSSSCG00000001697	TMEM63B	transmembrane protein 63B	140.781	1.01153	0.239832	4.21767	2.46837e-05	0.00315451	79.1594	161.146	59.2793	134.763	110.215	44.983	37.0955	42.668	55.775	396.946	100.929	39.8877	164.716	73.2491	60.7781	226.73	32.5582	196.952	199.935	34.2695	27.1875	82.3663	341.249	112.776	82.8505	77.2244	232.457	373.559	59.8587	260.927	32.0206	348.562	280.957	300.379	125.678	175.211	156.238	92.808	76.1072
ENSSSCG00000011752	FNDC3B	fibronectin type III domain containing 3B	11.9135	1.01166	0.308678	3.27738	0.00104776	0.0367296	8.79549	6.71444	1.18559	13.2357	14.328	13.12	17.9225	12.8588	21.2102	9.54198	10.6242	15.0396	3.40792	7.40721	6.9066	12.6969	23.3133	15.8137	8.19407	9.79129	10.2594	19.2188	17.4736	0	1.35821	1.7161	8.20437	2.7671	26.7226	22.6	29.5574	10.2518	7.71254	12.935	7.92563	18.6825	3.77995	19.5614	11.7913
ENSSSCG00000039321	FAM222B	family with sequence similarity 222 member B	56.6365	1.01313	0.240987	4.20409	2.6213e-05	0.00330808	37.6949	31.8936	49.7946	61.3655	18.7366	25.6153	26.2586	19.8728	16.4968	78.2442	26.5604	20.9247	23.8554	27.9828	37.2957	155.99	24.9211	93.4446	86.8572	16.1933	16.1586	46.6743	78.1173	78.1614	46.179	97.8176	87.5133	154.958	26.7226	100.673	14.2861	162.32	93.6523	93.4194	31.7025	84.3235	44.0995	32.385	39.6615
ENSSSCG00000004012	THBS2	thrombospondin 2	100.937	1.02259	0.263349	3.88302	0.000103169	0.00825587	120.624	95.6807	55.7225	121.528	113.522	21.8667	20.0065	17.5348	32.9937	183.206	89.2429	18.3091	101.102	62.5498	31.7704	117.899	15.2742	392.467	73.7466	11.6742	14.3632	113.254	132.594	117.242	20.3731	46.3346	136.74	232.437	33.6705	170.527	24.1386	251.169	239.089	196.899	62.2728	165.617	134.818	72.1598	76.1072
ENSSSCG00000011848	TFRC	transferrin receptor	131.976	1.03137	0.239096	4.31361	1.60608e-05	0.00242015	91.7243	73.8588	46.2378	119.121	112.42	41.2344	34.5947	43.2525	35.3503	265.267	76.4939	52.6387	54.5267	86.4175	66.3034	233.985	39.7933	153.824	119.633	28.2441	35.395	76.8752	309.386	120.592	96.4326	121.843	112.126	226.902	48.1008	209.563	41.873	565.558	348.166	317.626	153.984	131.282	138.598	227.782	90.0423
ENSSSCG00000016715	OSBPL3	oxysterol binding protein like 3	8.14359	1.03669	0.315252	3.28843	0.00100747	0.0359414	6.28249	8.39305	13.0414	14.4389	5.51077	3.12382	5.00164	12.8588	10.2123	15.2672	7.43691	6.21202	0	6.58419	6.9066	3.62768	8.84296	5.75044	4.91644	5.27223	7.95105	8.92302	8.22287	3.34977	4.07462	0	24.6131	8.30131	8.55125	16.4363	7.38936	10.2518	11.0179	20.1211	7.92563	6.56411	1.25998	7.60721	5.35966
ENSSSCG00000007493	-	aurora kinase A	14.0164	1.04148	0.295172	3.52837	0.000418125	0.0201831	8.79549	3.35722	7.11351	12.0325	6.61292	2.49906	6.66885	4.67594	2.35669	34.3511	4.24966	3.26949	12.4957	21.3986	16.5759	23.5799	3.61758	14.3761	18.027	6.02541	4.36025	8.92302	25.6965	15.6323	2.71641	10.2966	13.674	58.1091	9.0857	24.6545	1.9705	29.0468	30.8502	37.3678	13.5868	9.5937	12.5998	17.8226	8.57546
ENSSSCG00000010744	DHX32	DEAH-box helicase 32 (putative)	15.4016	1.04512	0.271253	3.85294	0.000116709	0.00885933	13.8215	5.03583	7.11351	9.62596	2.20431	14.3696	17.5057	9.93638	14.1401	22.9008	3.18725	17.0013	13.6317	4.93814	16.5759	18.1384	20.0976	23.0018	9.83289	18.0762	16.6716	9.60941	17.4736	16.7489	20.3731	20.5932	16.4087	13.8355	16.0336	36.9818	15.764	46.1331	11.0179	18.6839	3.3967	23.7318	8.81989	17.6053	9.64739
ENSSSCG00000004699	ELL3	elongation factor for RNA polymerase II 3	36.2805	1.05343	0.245903	4.28393	1.83625e-05	0.00261109	87.9549	16.7861	21.3405	49.3331	29.7581	40.6097	38.3459	26.8867	25.138	78.2442	54.1832	30.7332	27.2633	28.8058	24.8638	52.6013	34.5679	33.065	62.2749	55.735	35.1385	27.4554	106.897	8.93273	31.2387	30.8898	27.3479	47.0407	33.6705	30.8181	33.0058	29.0468	45.1735	25.87	5.66117	30.2959	15.1198	18.9093	13.9351
ENSSSCG00000012050	RCAN1	regulator of calcineurin 1	12.4726	1.05545	0.262269	4.02429	5.71473e-05	0.00560154	16.3345	10.0717	7.11351	15.6422	15.4301	9.99622	14.5881	8.76739	7.85563	15.2672	7.43691	7.51982	4.54389	12.3454	8.28793	36.2768	18.4898	18.6889	6.55526	12.804	6.41214	10.9822	29.8079	8.93273	9.50744	10.2966	13.674	11.0684	15.4991	22.6	6.89674	13.6691	13.2215	15.8094	18.1157	9.08876	2.51997	12.1715	2.14386
ENSSSCG00000010554	SCD	stearoyl-CoA desaturase	9.44909	1.05996	0.343124	3.08915	0.00200732	0.0539913	5.02599	5.03583	8.2991	12.0325	7.71507	9.99622	9.16967	11.6899	6.28451	26.7175	3.18725	12.751	5.67986	11.5223	0	14.5107	10.0488	2.87522	1.63881	22.9719	20.5188	8.92302	25.6965	3.34977	5.43282	3.4322	8.20437	11.0684	11.758	12.3273	3.94099	11.9604	9.91613	8.62333	9.05787	5.55424	6.29992	5.65107	9.64739
ENSSSCG00000033146	CD163	CD163 molecule	128.645	1.06347	0.335088	3.17371	0.00150503	0.0455189	82.9289	233.327	42.6811	231.023	170.834	36.8611	5.83524	18.7038	21.2102	145.038	82.8684	5.23118	81.79	229.624	98.0738	339.188	8.84296	366.59	58.9973	18.4528	23.3402	202.484	148.012	46.8968	16.2985	18.8771	144.944	307.148	27.7915	336.945	25.1238	75.1799	354.777	498.716	184.554	10.0986	89.4589	54.7719	173.653
ENSSSCG00000005423	ABCA1	ATP binding cassette subfamily A member 1	43.4096	1.06918	0.283806	3.76727	0.00016504	0.0115711	35.1819	26.8577	46.2378	45.7233	38.5754	6.24764	20.8402	5.84493	7.07007	41.9847	23.3731	18.6361	32.9432	75.7182	23.4825	190.453	9.24492	102.07	29.4987	9.03812	8.20754	53.5381	93.5352	35.7309	33.9551	29.1737	87.5133	22.1368	11.2235	73.9635	7.88199	44.4245	102.467	126.475	62.2728	19.1874	21.4197	38.6881	32.158
ENSSSCG00000012377	KIF4A	kinesin family member 4A	10.4181	1.06918	0.33079	3.2322	0.0012284	0.0408602	13.8215	8.39305	4.74234	8.42272	5.51077	3.12382	3.33442	2.33797	2.35669	20.9924	4.24966	4.57728	2.27194	7.40721	8.28793	36.2768	1.20586	11.5009	13.1105	2.25953	5.3862	7.55025	27.7522	13.3991	8.14923	3.4322	21.8783	30.4381	3.74117	6.16363	1.47787	10.2518	23.1376	20.1211	4.52893	9.5937	21.4197	8.69395	15.0071
ENSSSCG00000037566	-	myotubularin-related protein 9	22.0146	1.08447	0.272997	3.97247	7.11324e-05	0.00641208	20.104	11.7503	13.0414	27.6746	7.71507	44.3582	34.5947	36.2386	62.0595	20.9924	6.37449	28.4445	21.5835	8.23024	16.5759	10.883	46.6265	25.877	19.6658	19.206	26.6745	24.0235	34.9472	1.11659	9.50744	3.4322	0	16.6026	32.6016	18.4909	35.9616	44.4245	19.8323	21.5583	13.5868	24.7416	2.51997	33.6891	12.8632
ENSSSCG00000039214	-	interleukin 1 beta	17.1785	1.08896	0.366875	2.9682	0.00299545	0.0663202	2.513	16.7861	18.9694	19.2519	15.4301	6.24764	6.25205	4.67594	14.9257	17.1756	7.43691	1.63474	4.54389	13.1684	5.52528	77.995	3.21562	8.62566	16.3881	6.402	4.61674	10.9822	33.9193	17.8655	27.1641	24.0254	32.8175	30.4381	2.67226	45.1999	10.8377	39.2986	52.886	33.0561	6.7934	0.504931	16.3798	3.69493	9.64739
ENSSSCG00000029781	SELENOM	selenoprotein M	28.5309	1.10067	0.340777	3.22988	0.00123843	0.0408602	49.0034	58.7513	32.0108	48.1298	51.8012	23.741	15.8385	6.42942	33.7792	173.664	22.3107	18.963	0	10.6993	17.9572	34.4629	6.02929	56.0668	19.6658	2.25953	3.84728	30.8874	28.7801	30.148	5.43282	18.8771	27.3479	24.9039	13.3613	14.3818	6.40411	35.8813	44.0717	57.4888	1.13223	50.4931	23.9397	3.04288	10.7193
ENSSSCG00000011949	CEP97	centrosomal protein 97	14.296	1.11549	0.282426	3.94969	7.82531e-05	0.00681072	13.8215	5.03583	8.2991	16.8454	6.61292	17.4934	8.75286	14.0278	9.42676	34.3511	20.1859	5.55813	14.7676	5.76117	13.8132	19.9522	10.8527	17.2513	6.55526	10.9211	9.74645	17.1597	22.6129	8.93273	16.2985	13.7288	10.9392	22.1368	8.01679	26.7091	5.41886	18.795	12.1197	53.1772	11.3223	13.6331	5.03994	18.2573	3.2158
ENSSSCG00000007528	PHACTR3	phosphatase and actin regulator 3	15.8946	1.13055	0.364868	3.09851	0.00194497	0.0530713	8.79549	3.35722	7.11351	21.6584	8.81723	1.87429	3.33442	3.50696	3.92782	36.2595	4.24966	1.63474	17.0396	14.8144	8.28793	16.3245	3.61758	12.9385	4.91644	4.89565	1.7954	13.7277	41.1144	21.2152	8.14923	22.3093	19.1435	66.4105	6.94789	24.6545	3.44837	68.3454	17.6287	22.9955	10.1901	13.6331	13.8598	41.9483	15.0071
ENSSSCG00000013653	ICAM5	intercellular adhesion molecule 5	24.3527	1.13293	0.389178	2.91108	0.00360181	0.072082	21.3605	11.7503	23.7117	15.6422	12.1237	6.8724	3.75123	8.1829	8.6412	45.8015	8.49932	2.28864	31.8072	13.9914	15.1945	19.9522	6.43125	90.5694	67.1914	4.51906	3.33431	24.7099	95.5909	36.8475	5.43282	5.14829	41.0219	85.7802	8.55125	18.4909	4.43362	27.3382	39.6645	40.2422	9.05787	22.217	12.5998	30.6462	20.3667
ENSSSCG00000006618	CELF3	CUGBP Elav-like family member 3	12.2501	1.13697	0.4183	2.71806	0.00656656	0.0985925	5.02599	10.0717	4.74234	10.8292	13.2258	17.4934	1.66721	4.09145	9.42676	36.2595	19.1235	4.90423	0	0	9.66925	18.1384	4.01953	10.0633	6.55526	2.63612	2.30837	6.86386	39.0586	13.3991	10.8656	13.7288	41.0219	22.1368	4.27562	12.3273	1.9705	32.4641	25.3412	7.18611	7.92563	20.1973	6.29992	10.6501	11.7913
ENSSSCG00000016210	ABCB6	ATP binding cassette subfamily B member 6 (Langereis blood group)	77.7919	1.13905	0.312789	3.6416	0.000270946	0.0153678	33.9254	40.2866	34.382	83.0239	49.5969	13.12	14.5881	9.93638	14.1401	190.84	27.6228	10.1354	119.277	33.744	38.677	128.782	18.8918	142.323	103.245	9.79129	11.2854	89.9166	218.934	94.9103	48.8954	58.3473	71.1046	190.93	14.4302	178.745	9.35986	193.076	160.862	196.899	64.5373	94.4222	99.5388	95.6335	25.7264
ENSSSCG00000048111	-	-	5.51189	1.14019	0.408833	2.7889	0.00528869	0.0884151	5.02599	3.35722	8.2991	7.21947	6.61292	4.99811	6.25205	7.59841	3.92782	1.9084	9.56174	4.90423	4.54389	2.46907	2.76264	5.44151	6.02929	8.62566	0	6.402	9.23348	3.43193	18.5015	4.46637	6.79103	0	8.20437	5.5342	1.60336	10.2727	1.9705	3.41727	13.2215	5.74888	1.13223	8.58383	1.25998	5.65107	0
ENSSSCG00000003949	CDC20	cell division cycle 20	12.9151	1.14205	0.407901	2.79983	0.00511298	0.0873445	15.078	5.03583	13.0414	3.60974	8.81723	3.12382	3.33442	2.33797	7.07007	85.8778	6.37449	2.28864	12.4957	4.93814	5.52528	30.8352	4.42148	5.75044	19.6658	3.01271	2.30837	7.55025	16.4457	15.6323	1.35821	20.5932	16.4087	38.7394	3.74117	24.6545	3.94099	11.9604	42.9699	7.18611	4.52893	7.57397	5.03994	14.345	16.079
ENSSSCG00000011618	GATA2	GATA binding protein 2	9.67374	1.1461	0.398211	2.87812	0.00400049	0.0766785	10.052	6.71444	9.48468	18.0487	4.40861	4.99811	5.83524	2.92246	6.28451	0	4.24966	0.653897	5.67986	18.9295	5.52528	1.81384	4.42148	23.0018	4.91644	1.88294	5.12971	21.278	6.16715	3.34977	1.35821	3.4322	19.1435	58.1091	12.2924	20.5454	6.89674	5.12591	23.1376	18.6839	13.5868	1.51479	7.55991	4.78167	5.35966
ENSSSCG00000035795	-	small ubiquitin like modifier 3	6.31132	1.15156	0.39607	2.90746	0.00364378	0.0722742	10.052	0	4.74234	2.40649	4.40861	1.24953	3.75123	4.67594	10.2123	7.63358	8.49932	9.48151	2.27194	5.76117	1.38132	1.81384	2.81367	2.87522	0	4.14247	11.2854	5.49109	11.3064	6.69955	2.71641	1.7161	13.674	16.6026	5.87898	18.4909	9.85248	3.41727	9.91613	15.8094	5.66117	8.0789	3.77995	6.52047	1.07193
ENSSSCG00000022672	TRPM4	transient receptor potential cation channel subfamily M member 4	7.30305	1.15252	0.390476	2.95159	0.00316146	0.067582	7.53899	3.35722	7.11351	4.81298	3.30646	2.49906	8.75286	4.67594	3.92782	7.63358	3.18725	5.23118	13.6317	0.823024	1.38132	18.1384	4.01953	5.75044	11.4717	2.25953	5.89917	7.55025	7.19501	0	1.35821	3.4322	8.20437	49.8078	5.34453	8.21817	4.92624	10.2518	6.61075	15.8094	7.92563	7.06904	1.25998	5.86842	8.57546
ENSSSCG00000007692	-	tyrosine 3-monooxygenase/tryptophan 5-monooxygenase activation protein gamma	176.632	1.16135	0.155146	7.4855	7.12767e-14	3.59805e-10	253.813	171.218	110.259	216.584	125.645	174.309	97.5319	86.5049	118.62	223.282	95.6174	81.4102	124.957	188.472	98.0738	235.799	101.694	425.532	196.658	109.211	89.5135	190.815	404.976	125.058	133.104	152.733	339.114	390.161	110.097	207.509	91.1355	264.838	214.849	344.933	116.62	161.578	83.159	143.233	90.0423
ENSSSCG00000037371	TMPPE	transmembrane protein with metallophosphoesterase domain	11.7492	1.19817	0.385791	3.10574	0.00189802	0.0524306	6.28249	10.0717	8.2991	20.4552	7.71507	9.37146	11.6705	7.01391	11.7834	17.1756	9.56174	9.48151	15.9036	9.87628	5.52528	21.7661	4.42148	23.0018	1.63881	11.6742	5.89917	7.55025	37.0029	11.1659	4.07462	12.0127	13.674	27.671	1.60336	18.4909	0.985248	10.2518	11.0179	18.6839	1.13223	17.1677	12.5998	23.4737	1.07193
ENSSSCG00000017776	ERAL1	Era like 12S mitochondrial rRNA chaperone 1	38.8406	1.22136	0.226902	5.38279	7.33414e-08	4.06026e-05	17.591	23.5005	24.8973	38.5039	35.2689	23.1163	27.509	22.2107	18.068	120.229	20.1859	31.0601	21.5835	20.5756	22.1011	56.229	22.9113	84.819	13.1105	18.4528	22.3142	24.0235	87.368	23.4484	24.4477	42.9024	43.7567	102.383	21.3781	57.5272	20.6902	61.5109	52.886	83.3588	24.9091	53.5227	34.0196	43.4698	28.9422
ENSSSCG00000025245	ARMC5	armadillo repeat containing 5	5.06894	1.23071	0.442677	2.78016	0.00543327	0.0893938	18.8475	1.67861	1.18559	6.01623	6.61292	6.24764	8.75286	1.75348	3.92782	9.54198	1.06242	6.21202	3.40792	4.11512	0	5.44151	5.22539	5.75044	11.4717	4.89565	5.3862	4.11832	6.16715	2.23318	4.07462	0	8.20437	8.30131	2.13781	0	1.47787	11.9604	5.50896	1.43722	2.26447	9.5937	3.77995	7.82456	1.07193
ENSSSCG00000031109	HILPDA	hypoxia inducible lipid droplet associated	4.39331	1.23451	0.43641	2.82879	0.00467247	0.0832689	5.02599	6.71444	2.37117	8.42272	1.10215	2.49906	3.33442	4.67594	5.49894	1.9084	1.06242	3.26949	1.13597	1.64605	1.38132	7.25535	8.44101	8.62566	4.91644	3.76588	3.07783	2.05916	9.25073	0	5.43282	8.58049	2.73479	5.5342	8.01679	0	7.38936	5.12591	12.1197	4.31166	2.26447	6.56411	1.25998	4.56433	0
ENSSSCG00000011384	BSN	bassoon presynaptic cytomatrix protein	11.4677	1.23963	0.412254	3.00697	0.00263869	0.0622816	6.28249	0	5.92793	13.2357	5.51077	3.74858	1.66721	4.09145	3.14225	51.5267	8.49932	3.59643	6.81583	7.40721	2.76264	18.1384	4.82343	5.75044	6.55526	6.77859	3.33431	2.74554	22.6129	8.93273	0	3.4322	2.73479	19.3697	5.87898	41.0909	0.985248	17.0864	31.952	30.1816	22.6447	11.6134	18.8998	28.9074	8.57546
ENSSSCG00000020813	FAM20C	FAM20C golgi associated secretory pathway kinase	9.0924	1.24023	0.419829	2.95413	0.00313547	0.0674962	1.2565	0	4.74234	4.81298	5.51077	15.6191	16.6721	7.01391	31.4225	15.2672	3.18725	9.80846	7.95181	3.29209	1.38132	3.62768	20.4996	12.9385	0	7.53176	13.8502	2.05916	15.4179	0	5.43282	6.86439	13.674	13.8355	13.3613	16.4363	29.0648	5.12591	6.61075	4.31166	2.26447	6.56411	3.77995	19.1267	4.28773
ENSSSCG00000039862	TRIB3	tribbles pseudokinase 3	29.7659	1.24036	0.224766	5.51843	3.42033e-08	2.87764e-05	28.8995	13.4289	10.6703	33.6909	18.7366	13.12	17.0889	6.42942	7.85563	34.3511	27.6228	4.57728	42.031	15.6375	11.0506	72.5535	14.8723	57.5044	31.1375	8.66153	12.0548	49.4198	57.5601	27.9148	16.2985	32.6059	60.1654	38.7394	15.4991	57.5272	7.38936	71.7627	49.5806	66.1122	21.5124	55.5424	18.8998	15.2144	17.1509
ENSSSCG00000038144	-	myosin heavy chain 10	67.84	1.24173	0.248124	5.00447	5.60161e-07	0.000188513	47.7469	36.9294	30.8252	69.7882	45.1883	34.9868	25.0082	28.6401	30.637	230.916	56.308	19.6169	96.5576	56.7886	13.8132	108.83	27.7347	107.821	37.6927	19.206	16.4151	68.6386	126.427	68.1121	51.6118	46.3346	82.0437	174.327	22.9815	80.1272	14.7787	259.713	113.485	135.099	45.2893	78.7693	52.9194	50.4249	33.2299
ENSSSCG00000001418	NEU1	neuraminidase 1	24.647	1.24801	0.266892	4.6761	2.92388e-06	0.000670897	30.1559	15.1075	14.227	36.0974	11.0215	23.741	19.5897	6.42942	24.3525	62.9771	27.6228	12.424	26.1274	15.6375	12.4319	48.9736	16.4801	87.6942	27.8598	14.3103	12.5678	24.7099	67.8387	6.69955	12.2238	20.5932	38.2871	41.5065	16.0336	6.16363	18.2271	20.5036	34.1555	15.8094	18.1157	20.7022	16.3798	26.7339	10.7193
ENSSSCG00000003861	ORC1	origin recognition complex subunit 1	4.51004	1.25387	0.413225	3.03435	0.00241054	0.0595032	5.02599	6.71444	1.18559	8.42272	6.61292	0.624764	2.91762	3.50696	0.785563	3.81679	3.18725	2.94254	3.40792	0	1.38132	9.06919	2.00976	4.31283	6.55526	2.63612	2.82134	4.11832	13.3622	3.34977	1.35821	1.7161	0	11.0684	2.67226	8.21817	2.46312	11.9604	7.71254	10.0605	0	2.52466	6.29992	9.99805	1.07193
ENSSSCG00000003592	SDC3	syndecan 3	9.641	1.25499	0.446366	2.81156	0.00493013	0.0853767	1.2565	0	4.74234	1.20325	8.81723	1.24953	2.50082	8.1829	7.07007	61.0687	6.37449	0.653897	13.6317	6.58419	6.9066	12.6969	3.21562	8.62566	6.55526	2.63612	1.7954	7.55025	11.3064	5.58296	2.71641	10.2966	10.9392	35.9723	7.48234	18.4909	5.41886	22.2123	13.2215	20.1211	2.26447	19.6923	3.77995	7.82456	5.35966
ENSSSCG00000003566	NUDC	nuclear distribution C, dynein complex regulator	68.3747	1.25714	0.248464	5.05963	4.20065e-07	0.000157073	86.6984	40.2866	33.1964	58.959	58.4141	48.7316	40.8467	35.6541	49.4905	175.572	28.6852	44.465	56.7986	102.878	31.7704	32.6491	55.8714	125.072	54.0809	83.226	58.7352	91.2893	333.026	46.8968	52.97	44.6185	73.8394	69.1776	65.2032	117.109	51.2329	75.1799	53.9878	61.8005	50.9505	42.9192	28.9797	84.9834	20.3667
ENSSSCG00000013618	EPOR	erythropoietin receptor	70.1505	1.25718	0.342649	3.66901	0.000243494	0.0145967	26.3865	50.3583	14.227	49.3331	30.8603	6.8724	17.5057	12.2743	18.8535	234.733	38.247	10.1354	38.6231	25.5137	30.3891	108.83	14.8723	112.134	91.7736	4.14247	4.36025	39.8104	181.931	69.2287	48.8954	66.9278	79.3089	193.697	18.1714	154.091	8.86723	290.468	154.251	142.285	54.3472	110.075	69.2992	75.2027	38.5896
ENSSSCG00000012848	EPS8L2	EPS8 like 2	4.92543	1.26785	0.426892	2.96994	0.00297855	0.0662367	6.28249	1.67861	8.2991	4.81298	2.20431	3.12382	3.33442	1.75348	2.35669	15.2672	6.37449	6.86592	0	1.64605	6.9066	5.44151	5.22539	4.31283	4.91644	3.01271	3.5908	6.86386	14.39	4.46637	2.71641	3.4322	2.73479	2.7671	3.20672	2.05454	3.44837	1.70864	27.5448	5.74888	3.3967	5.04931	1.25998	2.82553	1.07193
ENSSSCG00000007767	ZNF668	zinc finger protein 668	4.63664	1.26996	0.408062	3.11216	0.00185723	0.0519408	1.2565	0	0	3.60974	2.20431	3.74858	4.58483	4.67594	3.14225	0	0	2.94254	2.27194	6.58419	0	3.62768	8.03906	2.87522	3.27763	6.02541	5.3862	11.6686	11.3064	2.23318	4.07462	1.7161	2.73479	8.30131	8.01679	10.2727	8.37461	11.9604	9.91613	1.43722	3.3967	6.05918	8.81989	5.21637	1.07193
ENSSSCG00000015617	G0S2	G0/G1 switch 2	51.7459	1.27428	0.293546	4.34098	1.4185e-05	0.00223769	45.2339	48.6797	47.4234	69.7882	63.9249	0.624764	2.50082	1.16899	3.92782	270.992	45.6839	1.30779	15.9036	49.3814	26.2451	204.964	4.42148	103.508	44.248	3.38929	1.28243	48.047	90.4516	66.9955	46.179	10.2966	62.9002	96.8486	0.534453	39.0363	1.9705	68.3454	160.862	119.289	83.7853	2.52466	40.3195	1.52144	23.5825
ENSSSCG00000014869	LRRC32	leucine rich repeat containing 32	5.56272	1.27521	0.449542	2.8367	0.00455827	0.0824737	2.513	5.03583	4.74234	6.01623	8.81723	4.99811	0.416803	5.26043	3.92782	1.9084	3.18725	2.28864	0	8.23024	1.38132	27.2076	1.60781	8.62566	3.27763	1.50635	0.769457	10.9822	15.4179	11.1659	1.35821	5.14829	10.9392	0	1.06891	10.2727	1.47787	8.54318	17.6287	7.18611	1.13223	3.53452	5.03994	3.26023	1.07193
ENSSSCG00000007593	ANKRD61	ankyrin repeat domain 61	5.38359	1.27564	0.457632	2.78748	0.00531202	0.0884151	8.79549	0	1.18559	4.81298	4.40861	3.12382	0	0	0.785563	3.81679	2.12483	2.28864	2.27194	0.823024	2.76264	9.06919	0.401953	12.9385	4.91644	0.753176	1.02594	4.11832	23.6408	2.23318	5.43282	5.14829	2.73479	11.0684	0.534453	12.3273	1.47787	8.54318	16.5269	11.4978	6.7934	3.53452	17.6398	8.25926	2.14386
ENSSSCG00000027970	-	proline rich transmembrane protein 2	5.26292	1.2808	0.455544	2.81158	0.00492988	0.0853767	5.02599	0	0	3.60974	2.20431	10.621	10.0033	4.09145	3.14225	7.63358	2.12483	6.21202	7.95181	1.64605	4.14396	3.62768	6.8332	1.43761	1.63881	13.5572	6.66862	1.37277	11.3064	2.23318	1.35821	5.14829	0	2.7671	11.2235	4.10909	6.40411	5.12591	16.5269	15.8094	3.3967	3.53452	0	8.4766	4.28773
ENSSSCG00000044588	-	-	19.2798	1.29811	0.296046	4.38483	1.16076e-05	0.00192115	6.28249	10.0717	3.55676	8.42272	18.7366	9.37146	12.0873	13.4433	13.3546	82.061	18.0611	13.0779	14.7676	11.5223	4.14396	43.5321	10.4508	35.9402	21.3046	8.66153	7.43808	21.9644	31.8636	22.3318	8.14923	12.0127	10.9392	55.342	9.62015	20.5454	7.38936	51.2591	35.2573	34.4933	14.719	18.6825	16.3798	7.17251	7.50353
ENSSSCG00000034731	-	trefoil factor 1	6.04583	1.29929	0.457152	2.84214	0.00448123	0.0821098	1.2565	11.7503	8.2991	13.2357	1.10215	1.24953	4.16803	1.75348	3.92782	34.3511	8.49932	4.25033	2.27194	1.64605	1.38132	1.81384	2.41172	7.18805	1.63881	3.01271	0.769457	5.49109	9.25073	0	8.14923	3.4322	5.46958	27.671	2.67226	0	0.985248	22.2123	9.91613	5.74888	2.26447	6.05918	2.51997	2.60819	5.35966
ENSSSCG00000047067	-	-	5.5487	1.29987	0.462323	2.81161	0.00492939	0.0853767	6.28249	1.67861	1.18559	8.42272	5.51077	4.37335	2.50082	3.50696	2.35669	15.2672	1.06242	6.86592	4.54389	5.76117	1.38132	3.62768	10.8527	8.62566	1.63881	5.27223	8.46402	1.37277	8.22287	0	1.35821	0	0	2.7671	13.3613	22.6	10.3451	15.3777	2.20358	2.87444	5.66117	4.54438	5.03994	9.346	2.14386
ENSSSCG00000029304	STEAP3	STEAP3 metalloreductase	13.9513	1.31816	0.336229	3.92042	8.83938e-05	0.00743686	12.565	5.03583	3.55676	8.42272	7.71507	12.4953	5.83524	9.93638	9.42676	32.4427	6.37449	4.90423	18.1756	10.6993	9.66925	27.2076	5.62734	5.75044	1.63881	6.402	3.84728	13.7277	41.1144	15.6323	8.14923	5.14829	0	16.6026	11.2235	41.0909	13.7935	22.2123	33.0538	53.1772	6.7934	8.58383	8.81989	27.6033	9.64739
ENSSSCG00000021610	CHPF	chondroitin polymerizing factor	6.71377	1.32067	0.370309	3.56639	0.000361934	0.0185487	0	6.71444	0	9.62596	3.30646	3.12382	2.91762	1.75348	4.71338	13.3588	2.12483	6.86592	1.13597	3.29209	2.76264	7.25535	8.44101	7.18805	3.27763	7.15517	7.95105	8.92302	10.2786	4.46637	1.35821	1.7161	10.9392	13.8355	3.20672	12.3273	9.35986	1.70864	19.8323	14.3722	11.3223	11.6134	6.29992	11.9542	5.35966
ENSSSCG00000008197	SEMA4C	semaphorin 4C	23.3894	1.32195	0.460253	2.87222	0.00407593	0.0777895	6.28249	31.8936	3.55676	25.2682	22.0431	4.99811	2.91762	3.50696	14.9257	38.1679	14.8738	3.92338	3.40792	19.7526	11.0506	74.3674	3.61758	27.3146	16.3881	4.89565	6.15565	39.8104	97.6466	49.13	1.35821	32.6059	19.1435	13.8355	0.534453	82.1817	2.95574	71.7627	19.8323	63.2377	13.5868	29.286	7.55991	24.1257	4.28773
ENSSSCG00000021597	PHLDA2	pleckstrin homology like domain family A member 2	6.83007	1.32662	0.489662	2.70925	0.00674348	0.0997414	30.1559	0	10.6703	7.21947	2.20431	0	4.16803	2.33797	0	17.1756	3.18725	1.30779	5.67986	8.23024	17.9572	18.1384	6.02929	5.75044	4.91644	3.38929	1.53891	5.49109	3.08358	3.34977	2.71641	0	19.1435	11.0684	6.94789	20.5454	6.89674	3.41727	6.61075	11.4978	0	2.01973	10.0799	1.30409	2.14386
ENSSSCG00000003251	NLRP12	NLR family pyrin domain containing 12	15.2682	1.33881	0.326814	4.09654	4.1937e-05	0.00449603	12.565	13.4289	8.2991	36.0974	14.328	20.6172	10.8369	7.59841	14.1401	20.9924	11.6866	12.424	7.95181	20.5756	16.5759	38.0906	10.8527	28.7522	11.4717	11.6742	4.36025	9.60941	58.588	3.34977	5.43282	0	10.9392	33.2052	11.758	36.9818	3.94099	11.9604	9.91613	21.5583	13.5868	5.04931	2.51997	11.9542	11.7913
ENSSSCG00000031733	AKAP12	A-kinase anchoring protein 12	6.22626	1.34914	0.494543	2.72806	0.00637086	0.0971604	1.2565	1.67861	0	10.8292	19.8388	3.74858	4.16803	8.76739	0	26.7175	6.37449	1.96169	7.95181	4.11512	1.38132	10.883	4.42148	4.31283	0	2.25953	4.36025	2.05916	18.5015	1.11659	4.07462	0	13.674	13.8355	1.06891	12.3273	5.91149	3.41727	11.0179	10.0605	2.26447	4.03945	1.25998	6.73781	6.43159
ENSSSCG00000015652	IL10	interleukin 10	5.15818	1.3601	0.454935	2.98965	0.00279298	0.0642045	15.078	6.71444	3.55676	6.01623	15.4301	0	1.66721	0.584493	0.785563	9.54198	7.43691	0	3.40792	3.29209	2.76264	19.9522	0	8.62566	0	0.753176	0.256486	7.55025	8.22287	1.11659	2.71641	1.7161	16.4087	0	0	8.21817	1.47787	6.83454	6.61075	21.5583	3.3967	2.01973	3.77995	2.60819	1.07193
ENSSSCG00000038489	BHLHA15	basic helix-loop-helix family member a15	8.51843	1.37215	0.470464	2.91659	0.0035388	0.0713129	7.53899	6.71444	4.74234	2.40649	1.10215	6.8724	6.66885	2.92246	6.28451	0	8.49932	16.0205	1.13597	4.93814	11.0506	30.8352	10.8527	10.0633	13.1105	13.1806	10.7724	1.37277	25.6965	2.23318	2.71641	5.14829	0	13.8355	10.1546	8.21817	5.41886	25.6295	26.443	8.62333	5.66117	10.6036	0	2.60819	2.14386
ENSSSCG00000037621	KIAA1522	KIAA1522 ortholog	57.6882	1.4022	0.239284	5.85999	4.62892e-09	9.34672e-06	23.8735	52.0369	41.4955	74.6012	40.7797	19.3677	17.9225	18.1193	30.637	122.137	43.559	15.3666	46.5749	13.1684	19.3385	101.575	18.8918	107.821	22.9434	7.90835	4.87323	53.5381	121.287	35.7309	32.5969	48.0507	120.331	188.163	24.5848	121.218	14.7787	158.903	130.011	117.852	35.0992	83.3137	51.6594	35.4279	34.3018
ENSSSCG00000011386	MST1	macrophage stimulating 1	10.0808	1.4121	0.441329	3.19965	0.00137594	0.0434344	5.02599	11.7503	0	20.4552	13.2258	3.74858	3.33442	1.16899	2.35669	47.7099	3.18725	0.326949	3.40792	2.46907	8.28793	18.1384	1.60781	14.3761	11.4717	1.50635	1.28243	7.55025	38.0308	12.2825	2.71641	8.58049	16.4087	16.6026	3.20672	4.10909	1.9705	18.795	27.5448	15.8094	11.3223	9.08876	6.29992	14.7797	3.2158
ENSSSCG00000039135	ARHGAP33	proline and serine rich 3	4.23149	1.41769	0.492603	2.87796	0.00400253	0.0766785	2.513	3.35722	3.55676	3.60974	3.30646	2.49906	5.00164	2.92246	6.28451	0	1.06242	2.28864	4.54389	3.29209	1.38132	16.3245	5.22539	2.87522	0	6.02541	6.15565	8.23663	11.3064	0	1.35821	0	0	0	2.67226	8.21817	10.3451	3.41727	3.30538	14.3722	0	3.53452	7.55991	8.4766	0
ENSSSCG00000021620	STIP1	stress induced phosphoprotein 1	117.629	1.42968	0.268625	5.32223	1.02502e-07	5.17429e-05	233.709	65.4658	69.9495	167.251	133.361	113.707	42.5139	32.1471	34.5648	213.74	109.429	37.926	90.8778	157.198	42.8209	170.501	37.3816	376.654	170.437	88.4982	52.836	144.141	526.264	75.9282	63.8356	42.9024	46.4914	154.958	44.3596	211.618	34.9763	128.148	117.892	274.509	55.4794	52.0079	50.3994	80.8538	41.8054
ENSSSCG00000016107	C2CD6	C2 calcium dependent domain containing 6	8.98222	1.43749	0.489352	2.93754	0.00330827	0.0691249	3.76949	0	5.92793	12.0325	12.1237	0	0.833606	2.33797	0.785563	32.4427	7.43691	0.653897	11.3597	6.58419	2.76264	19.9522	1.20586	8.62566	11.4717	1.50635	1.53891	4.11832	46.2537	6.69955	4.07462	0	16.4087	11.0684	2.13781	24.6545	0.492624	15.3777	4.40717	35.9305	11.3223	9.5937	3.77995	9.56335	1.07193
ENSSSCG00000031174	FBP1	fructose-bisphosphatase 1	3.81165	1.44019	0.517221	2.78448	0.0053614	0.0890274	7.53899	1.67861	5.92793	8.42272	0	0.624764	5.83524	5.26043	3.92782	19.084	0	3.92338	1.13597	2.46907	1.38132	0	4.01953	2.87522	3.27763	0.753176	3.07783	4.8047	2.05572	2.23318	0	3.4322	5.46958	11.0684	2.13781	8.21817	3.94099	0	4.40717	7.18611	6.7934	3.53452	0	1.08674	1.07193
ENSSSCG00000037646	DNAJA4	DnaJ heat shock protein family (Hsp40) member A4	7.82719	1.44748	0.468931	3.08676	0.00202354	0.0540138	7.53899	3.35722	2.37117	4.81298	11.0215	5.62288	1.25041	2.33797	2.35669	15.2672	7.43691	1.63474	5.67986	11.5223	4.14396	9.06919	2.41172	25.877	13.1105	16.1933	2.82134	10.2958	51.3929	3.34977	8.14923	0	13.674	11.0684	1.60336	6.16363	1.47787	11.9604	8.81433	0	1.13223	3.53452	3.77995	11.9542	1.07193
ENSSSCG00000038089	COL18A1	collagen type XVIII alpha 1 chain	21.1271	1.45811	0.267216	5.45668	4.85117e-08	3.26516e-05	17.591	15.1075	7.11351	25.2682	13.2258	18.7429	13.3377	12.8588	17.2824	57.2519	9.56174	16.0205	13.6317	16.4605	6.9066	27.2076	16.882	47.4411	11.4717	8.66153	10.2594	10.9822	45.2258	11.1659	1.35821	17.161	5.46958	41.5065	10.6891	20.5454	16.2566	85.4318	40.7663	40.2422	11.3223	36.86	13.8598	17.8226	15.0071
ENSSSCG00000034339	-	CACN subunit beta associated regulatory protein	5.19644	1.48924	0.445566	3.34235	0.000830725	0.0318897	0	0	5.92793	9.62596	1.10215	4.37335	3.75123	8.76739	7.85563	19.084	7.43691	5.88508	1.13597	3.29209	1.38132	0	9.24492	12.9385	1.63881	6.402	3.33431	4.11832	14.39	2.23318	1.35821	1.7161	8.20437	11.0684	4.81008	4.10909	5.41886	3.41727	6.61075	1.43722	0	5.55424	3.77995	8.04191	3.2158
ENSSSCG00000007033	AP3M2	adaptor related protein complex 3 subunit mu 2	3.35803	1.50558	0.555103	2.71225	0.00668281	0.0990743	2.513	0	5.92793	8.42272	1.10215	3.74858	5.00164	2.33797	0.785563	1.9084	1.06242	8.50066	0	0	0	0	2.41172	1.43761	3.27763	7.90835	6.92511	7.55025	8.22287	0	0	3.4322	2.73479	0	6.41343	2.05454	3.44837	3.41727	6.61075	5.74888	2.26447	3.02959	0	8.4766	4.28773
ENSSSCG00000005349	GRHPR	glyoxylate and hydroxypyruvate reductase	9.45451	1.51051	0.433284	3.4862	0.000489928	0.0226895	6.28249	0	5.92793	0	4.40861	4.37335	7.91926	5.84493	18.068	49.6183	8.49932	12.424	0	4.11512	1.38132	10.883	11.6566	11.5009	1.63881	5.64882	9.23348	4.11832	21.585	2.23318	9.50744	13.7288	19.1435	22.1368	7.48234	6.16363	11.3304	17.0864	18.7305	5.74888	6.7934	6.56411	2.51997	4.78167	9.64739
ENSSSCG00000006564	-	RAB13, member RAS oncogene family	4.79698	1.52978	0.486247	3.1461	0.00165464	0.0484211	1.2565	3.35722	1.18559	7.21947	4.40861	0.624764	3.75123	0	2.35669	20.9924	3.18725	1.30779	1.13597	1.64605	4.14396	3.62768	0.803906	12.9385	3.27763	0.753176	1.02594	1.37277	4.11144	2.23318	0	10.2966	16.4087	2.7671	1.06891	32.8727	1.47787	8.54318	8.81433	5.74888	5.66117	0.504931	2.51997	2.60819	1.07193
ENSSSCG00000025993	SGPP2	sphingosine-1-phosphate phosphatase 2	6.97264	1.53476	0.434806	3.52976	0.000415929	0.0201831	1.2565	1.67861	1.18559	3.60974	2.20431	20.6172	14.1713	13.4433	16.4968	5.72519	5.31208	10.1354	0	0	2.76264	7.25535	12.4605	1.43761	1.63881	13.1806	13.5937	7.55025	9.25073	1.11659	2.71641	1.7161	0	2.7671	13.8958	8.21817	11.3304	17.0864	13.2215	1.43722	0	8.0789	6.29992	15.8665	3.2158
ENSSSCG00000016199	CYP27A1	cytochrome P450, family 27, subfamily A, polypeptide 1	11.4089	1.60185	0.482129	3.32245	0.000892322	0.0332431	20.104	0	4.74234	25.2682	0	4.37335	5.41844	6.42942	3.14225	15.2672	2.12483	1.63474	1.13597	5.76117	13.8132	36.2768	1.60781	10.0633	13.1105	1.88294	3.07783	26.0827	22.6129	5.58296	2.71641	0	21.8783	11.0684	0	20.5454	0	32.4641	42.9699	8.62333	20.3802	7.57397	40.3195	2.60819	4.28773
ENSSSCG00000013352	E2F8	E2F transcription factor 8	5.4247	1.60416	0.446319	3.59421	0.000325377	0.0172895	8.79549	6.71444	2.37117	4.81298	5.51077	2.49906	1.25041	1.75348	0	5.72519	0	2.94254	0	2.46907	2.76264	14.5107	2.00976	2.87522	8.19407	1.88294	0.769457	2.74554	19.5293	1.11659	4.07462	0	5.46958	16.6026	0.534453	8.21817	2.46312	22.2123	7.71254	20.1211	6.7934	7.57397	3.77995	3.69493	1.07193
ENSSSCG00000002039	MMP14	matrix metallopeptidase 14	4.75911	1.6266	0.470824	3.4548	0.000550707	0.0241736	0	1.67861	0	7.21947	0	2.49906	2.08402	1.16899	0	11.4504	6.37449	1.96169	4.54389	4.93814	1.38132	16.3245	2.41172	5.75044	1.63881	3.01271	1.7954	1.37277	9.25073	5.58296	0	0	0	11.0684	2.13781	10.2727	2.95574	8.54318	14.3233	27.3072	2.26447	4.54438	6.29992	1.30409	2.14386
ENSSSCG00000001437	AGER	advanced glycosylation end-product specific receptor	3.5452	1.63994	0.578088	2.83684	0.00455624	0.0824737	0	0	1.18559	4.81298	1.10215	3.74858	2.91762	6.42942	7.85563	5.72519	0	2.28864	1.13597	2.46907	0	1.81384	4.42148	7.18805	0	9.03812	3.5908	4.8047	3.08358	1.11659	0	5.14829	8.20437	13.8355	1.06891	0	2.95574	0	4.40717	4.31166	0	9.5937	1.25998	7.38986	5.35966
ENSSSCG00000038453	SYNPO	synaptopodin	5.8055	1.64019	0.503624	3.25677	0.00112688	0.0384357	5.02599	3.35722	2.37117	14.4389	20.9409	1.24953	1.66721	1.75348	3.92782	20.9924	1.06242	2.28864	0	3.29209	2.76264	7.25535	0	2.87522	0	0.753176	1.28243	1.37277	29.8079	1.11659	1.35821	3.4322	13.674	19.3697	0.534453	12.3273	0.492624	3.41727	6.61075	17.2467	10.1901	0.504931	3.77995	1.73879	2.14386
ENSSSCG00000030303	ACHE	acetylcholinesterase (Cartwright blood group)	93.4184	1.66504	0.323201	5.15171	2.58121e-07	0.00010023	70.3639	47.0011	18.9694	86.6337	60.6184	20.6172	15.0049	18.7038	13.3546	333.969	46.7463	12.424	69.2943	26.3368	22.1011	92.5057	20.4996	161.012	62.2749	6.402	6.15565	50.7926	297.051	43.5471	31.2387	51.4829	106.657	276.71	18.1714	228.054	5.91149	387.86	208.239	252.951	79.2563	136.836	123.479	85.8528	48.2369
ENSSSCG00000007671	TFR2	actin like 6B	34.0784	1.69065	0.343784	4.91777	8.75339e-07	0.000276169	22.617	8.39305	14.227	36.0974	23.1452	8.12193	9.16967	8.76739	10.2123	166.03	13.8114	5.88508	19.3115	25.5137	8.28793	76.1812	9.64687	92.007	50.8032	4.89565	2.30837	20.5916	55.5044	33.4977	2.71641	13.7288	35.5523	141.122	4.27562	26.7091	8.37461	71.7627	81.5326	104.917	29.4381	35.3452	25.1997	14.7797	8.57546
ENSSSCG00000034559	-	-	6.68927	1.74514	0.552041	3.16126	0.00157091	0.0470086	2.513	0	1.18559	7.21947	8.81723	1.87429	0.833606	0.584493	0	24.8091	4.24966	1.30779	0	4.11512	2.76264	10.883	0.803906	17.2513	6.55526	0.376588	0.769457	2.05916	26.7243	0	1.35821	5.14829	5.46958	22.1368	0	6.16363	0.985248	27.3382	17.6287	8.62333	3.3967	8.0789	3.77995	15.4318	9.64739
ENSSSCG00000047932	HSPA6	heat shock protein family A (Hsp70) member 6	197.735	1.756	0.454534	3.8633	0.000111866	0.00865262	246.274	99.0379	58.0937	208.161	111.317	120.579	31.677	17.5348	40.0637	599.236	26.5604	15.6935	186.299	423.034	49.7276	304.725	24.1172	530.478	444.119	100.172	15.1326	341.134	894.237	104.96	71.9849	123.559	169.557	318.217	44.894	415.018	13.3008	278.508	298.586	449.85	57.7439	68.1657	50.3994	328.414	31.086
ENSSSCG00000010686	BAG3	BAG cochaperone 3	81.7495	1.78734	0.359254	4.97516	6.51932e-07	0.00021232	129.419	20.1433	47.4234	152.812	45.1883	39.3601	15.4217	16.3658	15.7113	229.008	22.3107	13.0779	64.7504	120.161	33.1517	130.596	15.6762	389.592	158.965	24.8548	4.87323	137.964	302.191	34.6143	25.8059	30.8898	38.2871	143.889	21.9126	96.5635	5.91149	175.989	79.329	176.778	23.7769	82.8087	42.8395	51.9464	27.8702
ENSSSCG00000007554	ZFAND2A	zinc finger AN1-type containing 2A	63.3141	1.83437	0.335918	5.46078	4.74059e-08	3.26516e-05	56.5424	21.8219	18.9694	132.357	45.1883	34.362	15.4217	14.0278	16.4968	202.29	14.8738	8.17372	68.1583	59.2577	13.8132	132.41	16.4801	106.383	72.1078	24.8548	5.64268	77.5616	202.488	43.5471	33.9551	44.6185	87.5133	168.793	20.8437	100.673	4.92624	105.935	74.9218	196.899	22.6447	113.61	31.4996	48.4688	10.7193
ENSSSCG00000008162	IL1R1	interleukin 1 receptor type 1	8.60451	1.89763	0.399199	4.75359	1.99832e-06	0.000492074	10.052	11.7503	0	22.8617	5.51077	2.49906	1.66721	0	0	34.3511	5.31208	0	6.81583	3.29209	1.38132	23.5799	1.20586	8.62566	6.55526	3.01271	0.512971	24.0235	23.6408	0	4.07462	10.2966	16.4087	22.1368	0	16.4363	0.492624	3.41727	9.91613	33.0561	6.7934	1.51479	10.0799	1.08674	3.2158
ENSSSCG00000009334	HSPH1	heat shock protein family H (Hsp110) member 1	297.559	1.98379	0.36905	5.3754	7.64113e-08	4.06026e-05	546.577	161.146	72.3207	385.039	193.979	426.089	86.695	102.286	66.7729	589.694	139.176	67.6784	186.299	565.417	104.98	380.906	82.4003	944.509	439.202	336.67	107.211	469.488	1570.57	92.6771	95.0744	58.3473	216.048	345.888	74.8234	511.581	52.2182	375.9	390.034	763.164	76.9919	108.055	109.619	261.036	48.2369
ENSSSCG00000034167	SLC5A3	solute carrier family 5 member 3	4.48909	1.99104	0.621913	3.20147	0.00136729	0.0434093	7.53899	0	1.18559	3.60974	1.10215	4.37335	5.41844	1.75348	2.35669	1.9084	6.37449	3.59643	0	6.58419	0	1.81384	0.803906	0	4.91644	14.3103	7.1816	8.23663	41.1144	0	0	1.7161	2.73479	0	1.60336	8.21817	0.985248	3.41727	13.2215	4.31166	2.26447	2.01973	0	8.25926	2.14386
ENSSSCG00000033952	-	Cbp/p300 interacting transactivator with Glu/Asp rich carboxy-terminal domain 4	3.12215	1.99828	0.642443	3.11045	0.00186804	0.0520987	6.28249	1.67861	0	3.60974	5.51077	1.87429	0.416803	2.33797	5.49894	0	1.06242	2.61559	0	0	0	5.44151	2.81367	1.43761	0	1.88294	2.56486	1.37277	7.19501	5.58296	0	0	0	24.9039	2.13781	6.16363	1.47787	8.54318	9.91613	4.31166	2.26447	0.504931	0	0.217349	2.14386
ENSSSCG00000013784	DNAJB1	DnaJ heat shock protein family (Hsp40) member B1	419.22	2.01967	0.364783	5.53664	3.08336e-08	2.82996e-05	559.142	223.255	143.456	514.989	322.931	258.027	78.7758	92.9343	77.7708	1889.31	163.612	63.428	220.379	632.082	100.836	692.886	84.8121	1042.27	565.391	172.477	68.4816	484.589	2125.61	119.475	161.626	180.19	229.722	581.091	97.2704	854.69	65.0264	724.461	771.254	1052.05	113.223	166.627	154.978	444.696	55.7405
ENSSSCG00000008601	SDC1	syndecan 1	23.2666	2.14964	0.387207	5.55164	2.82997e-08	2.82996e-05	23.8735	10.0717	10.6703	32.4876	18.7366	4.37335	4.16803	5.84493	7.85563	122.137	3.18725	0.980846	14.7676	7.40721	8.28793	23.5799	3.21562	20.1265	13.1105	2.25953	2.30837	13.0413	116.148	11.1659	8.14923	17.161	32.8175	44.2736	8.55125	67.7999	2.95574	95.6836	22.0358	68.9866	7.92563	14.1381	20.1598	16.9532	0
ENSSSCG00000032299	LEFTY2	left-right determination factor 2	3.08798	2.15126	0.769353	2.79619	0.00517085	0.087887	0	5.03583	0	0	1.10215	1.87429	1.66721	0	0.785563	11.4504	0	0	10.2237	0.823024	0	10.883	4.42148	5.75044	1.63881	1.12976	1.02594	0.686386	8.22287	0	0	1.7161	5.46958	11.0684	0	0	0.492624	20.5036	0	10.0605	0	1.00986	2.51997	0.869395	0
ENSSSCG00000030368	HSPA1L	heat shock protein family A (Hsp70) member 1 like	4.63444	2.25979	0.663902	3.40381	0.000664538	0.0271627	2.513	0	0	3.60974	4.40861	1.24953	0	2.92246	0	34.3511	3.18725	0.653897	2.27194	1.64605	0	5.44151	0.401953	14.3761	1.63881	1.12976	0.256486	22.6507	13.3622	8.93273	1.35821	1.7161	13.674	0	0	12.3273	0	0	2.20358	10.0605	2.26447	1.51479	0	8.4766	2.14386
ENSSSCG00000044205	-	-	5.22022	2.27524	0.63078	3.60703	0.000309727	0.016633	3.76949	5.03583	5.92793	8.42272	0	4.37335	2.50082	2.33797	0	19.084	0	1.30779	3.40792	0	0	21.7661	0	15.8137	8.19407	0.376588	1.53891	11.6686	17.4736	2.23318	0	6.86439	8.20437	16.6026	0	6.16363	0.492624	6.83454	3.30538	2.87444	1.13223	9.5937	0	5.21637	1.07193
ENSSSCG00000001702	SLC35B2	solute carrier family 35 member B2	4.97478	2.33426	0.59982	3.89161	9.9582e-05	0.00809198	5.02599	0	4.74234	2.40649	0	0.624764	0.416803	2.33797	0	36.2595	4.24966	1.63474	1.13597	3.29209	0	5.44151	0.401953	8.62566	3.27763	0.376588	1.02594	5.49109	29.8079	0	2.71641	8.58049	2.73479	0	0	16.4363	1.47787	8.54318	9.91613	14.3722	1.13223	3.53452	1.25998	6.73781	0
ENSSSCG00000008959	CXCL2	chemokine (C-X-C motif) ligand 2	19.8099	2.37265	0.410856	5.77491	7.69959e-09	1.1105e-05	18.8475	3.35722	9.48468	13.2357	15.4301	1.24953	0	0	0.785563	85.8778	8.49932	0	7.95181	11.5223	1.38132	159.618	0.401953	38.8155	27.8598	0	0.512971	11.6686	84.2844	8.93273	10.8656	5.14829	46.4914	41.5065	0	32.8727	0.985248	49.5504	34.1555	15.8094	16.9835	0.504931	7.55991	0.434698	0
ENSSSCG00000008953	CXCL8	C-X-C motif chemokine ligand 8	46.1814	2.38454	0.315077	7.5681	3.78716e-14	3.59805e-10	120.624	18.4647	29.6396	34.8941	33.0646	2.49906	1.66721	1.75348	0.785563	215.649	25.498	1.30779	17.0396	42.7972	6.9066	275.703	2.41172	112.134	13.1105	0	0.512971	52.1653	165.485	27.9148	6.79103	37.7542	109.392	55.342	0.534453	108.891	0	61.5109	130.011	30.1816	27.1736	1.51479	23.9397	0.652047	5.35966
ENSSSCG00000029160	-	-	1402.45	2.46682	0.474545	5.19829	2.01129e-07	8.82868e-05	2393.63	575.763	341.448	1715.83	913.685	1068.97	224.657	96.4413	133.546	6603.05	314.475	61.7933	772.461	1307.78	258.307	2532.12	193.741	5741.81	2486.08	562.246	152.352	3302.89	7188.85	413.139	328.686	435.889	902.481	2266.26	173.697	1955.92	54.1886	1713.76	1851.01	2799.71	203.802	632.679	249.477	1636.64	136.135
ENSSSCG00000036060	RRAD	RRAD, Ras related glycolysis inhibitor and calcium channel regulator	3.6551	2.79757	0.727474	3.84559	0.000120261	0.00892764	0	3.35722	3.55676	3.60974	0	0	0	0	0.785563	30.5343	1.06242	1.96169	0	0	0	1.81384	0.803906	11.5009	3.27763	1.50635	1.02594	6.17747	5.13929	0	0	0	2.73479	13.8355	0	2.05454	0	10.2518	4.40717	18.6839	2.26447	5.55424	2.51997	4.12963	0
ENSSSCG00000028814	SOD3	superoxide dismutase 3	300.707	2.80957	0.983758	2.85596	0.0042907	0.0799241	1135.87	0	1119.19	1590.69	2.20431	3.12382	0	5.26043	0	15.2672	4.24966	2.94254	3.40792	0	2.76264	3.62768	0.401953	1328.35	22.9434	3.38929	0.256486	6.17747	1.02786	6.69955	5.43282	10.2966	13.674	4394.16	3.74117	16.4363	0.492624	6.83454	2.20358	1991.99	15.8513	2.01973	3.77995	0.652047	2.14386
ENSSSCG00000000864	CHPT1	choline phosphotransferase 1	3.0468	2.94683	0.811844	3.6298	0.000283639	0.0157342	1.2565	0	0	3.60974	0	3.12382	3.75123	4.67594	18.8535	15.2672	0	0.653897	0	0.823024	1.38132	0	4.82343	1.43761	0	4.14247	3.33431	6.86386	4.11144	0	0	0	0	0	5.87898	6.16363	11.823	0	2.20358	0	2.26447	1.51479	0	10.8674	0

## Sheet: CONhighvslow
ENSID	GeneName	GeneDescription	baseMean	log2FoldChange	lfcSE	stat	pvalue	padj	IAIPSBlood1	IAIPSBlood2	IAIPSBlood3	IAIPSBlood4	IAIPSBlood5	IAIPSBlood6	IAIPSBlood7	IAIPSBlood8	IAIPSBlood9	IAIPSBlood10	IAIPSBlood11	IAIPSBlood12	IAIPSBlood13	IAIPSBlood14	IAIPSBlood15	IAIPSBlood16	IAIPSBlood17	IAIPSBlood18	IAIPSBlood19	IAIPSBlood20	IAIPSBlood21	IAIPSBlood22	IAIPSBlood23	IAIPSBlood24	IAIPSBlood25	IAIPSBlood26	IAIPSBlood27	IAIPSBlood28	IAIPSBlood29	IAIPSBlood30	IAIPSBlood31	IAIPSBlood32	IAIPSBlood33	IAIPSBlood34	IAIPSBlood35	IAIPSBlood36	IAIPSBlood37	IAIPSBlood38	IAIPSBlood39
ENSSSCG00000038359		eukaryotic translation initiation factor 5A	289.69	0.42578	0.13827	3.07934	0.00207458	0.0885755	300.303	308.864	225.261	308.031	319.624	263.65	272.589	189.96	267.877	446.565	213.546	204.997	273.769	231.27	219.63	292.028	261.671	438.471	291.709	196.956	183.644	241.608	336.11	262.399	198.298	350.084	402.014	395.696	298.759	458.163	242.371	415.198	349.268	405.296	236.637	320.631	244.437	238.649	191.876
ENSSSCG00000017403	STAT3	signal transducer and activator of transcription 3	552.784	0.47191	0.14962	3.15407	0.00161012	0.0746455	644.583	570.727	573.823	767.671	598.469	395.476	268.004	283.479	370.786	688.931	743.691	204.67	544.131	745.659	593.968	678.375	303.072	1046.58	553.919	271.52	176.206	712.469	617.743	438.82	662.804	418.728	667.289	913.144	383.737	680.054	216.262	635.612	636.836	804.844	697.456	328.71	521.634	319.72	878.984
ENSSSCG00000000084	ATF4	activating transcription factor 4	923.07	0.49428	0.164036	3.01324	0.00258474	0.0959741	942.373	904.77	850.064	848.288	875.11	692.863	539.76	551.761	754.141	1280.53	1046.48	461.325	895.146	749.775	1005.6	912.36	629.458	1374.35	1004.59	586.348	387.55	822.291	714.362	1138.92	778.252	1580.53	1288.09	1076.4	834.281	980.017	584.252	1383.99	1234.01	995.994	1046.18	1003.8	1180.61	560.108	1504.99
ENSSSCG00000035622	UBE2D3	ubiquitin conjugating enzyme E2 D3	1481.93	0.568675	0.16378	3.47219	0.00051623	0.0455338	1853.33	2173.8	1478.42	1802.46	1552.93	1020.24	778.588	922.914	1164.2	1942.75	1777.42	723.537	1391.57	1294.62	1629.96	1706.82	739.995	1699.25	2104.24	692.546	457.827	1271.87	1033	1548.71	1513.04	2443.72	2237.06	2086.39	1143.73	1458.73	688.688	1946.14	1864.23	1780.72	1595.32	1292.12	2070.16	625.53	2288.58
ENSSSCG00000032284	CCND3	cyclin D3	1073.57	0.612032	0.192319	3.18237	0.00146074	0.0735613	1295.45	1601.39	1298.22	1236.94	1349.04	822.189	562.267	661.646	1214.48	1591.6	1100.66	612.702	1258.66	1043.59	987.644	1075.61	477.922	1720.82	1275	649.991	324.967	1133.91	600.27	1160.14	829.863	1420.93	1167.76	2091.93	1065.7	1070.42	583.267	1008.09	1231.8	1191.46	1295.27	907.362	1070.99	393.619	1485.7
ENSSSCG00000008602	LAPTM4A	lysosomal protein transmembrane 4 alpha	458.86	0.632682	0.147706	4.2834	1.84062e-05	0.00661845	534.012	580.799	533.513	599.216	437.555	214.294	229.658	184.7	255.308	625.954	589.641	196.496	393.046	419.742	464.124	582.242	158.369	698.678	535.892	144.986	121.574	496.944	456.369	422.072	395.238	566.312	607.124	1015.53	243.176	525.963	143.354	649.281	677.602	642.438	557.059	384.253	705.592	152.796	754.64
ENSSSCG00000000767		ATPase H+ transporting V1 subunit E1	3892.91	0.644606	0.208737	3.08812	0.00201426	0.0879113	4533.44	7041.77	4589.4	5142.67	5654.05	2096.71	1852.27	2080.79	2293.06	7917.94	4937.04	1694.25	3427.23	3065.76	3606.63	5581.18	1366.24	5081.95	6864.99	1052.56	728.932	2593.17	2960.23	4361.41	4749.64	5846.75	5537.95	6948.19	1968.39	5189.78	1236.49	3962.32	5837.29	4650.85	3705.8	2068.2	4324.27	876.785	4397.07
ENSSSCG00000039952	ZFAND3	zinc finger AN1-type containing 3	248.297	0.696452	0.203635	3.4201	0.000625974	0.0455338	348.05	293.757	367.531	383.835	264.517	179.307	132.543	117.483	189.321	442.748	313.413	102.662	273.769	268.306	247.256	203.15	134.654	261.645	329.402	115.236	60.7871	178.46	128.482	202.103	181.999	307.182	243.396	572.79	184.921	287.636	125.619	165.738	338.25	261.574	381.563	182.28	389.335	94.1121	428.773
ENSSSCG00000006835	SARS1	seryl-tRNA synthetase 1	312.017	0.711317	0.223223	3.18658	0.00143967	0.0735613	330.459	268.577	260.829	269.527	396.775	209.921	161.72	229.706	286.731	503.817	181.673	207.612	238.554	253.491	234.825	404.486	216.251	441.346	313.014	123.897	157.739	324.661	409.088	371.825	304.238	379.258	429.362	564.489	328.154	291.745	199.02	551.889	470.465	311.877	346.463	503.417	323.816	99.9805	267.983
ENSSSCG00000026904	NFKBIB	NFKB inhibitor beta	113.169	0.715683	0.214294	3.33972	0.000838619	0.0549016	148.267	115.824	133.971	128.747	131.156	39.9849	53.7676	54.3578	54.9894	293.893	125.365	51.9848	90.8778	79.8333	87.0232	136.038	59.891	208.453	106.523	28.2441	32.3172	102.272	117.176	109.426	71.9849	123.559	114.861	168.793	90.857	139.709	43.3509	232.374	235.783	132.224	79.2563	127.243	133.558	50.6423	179.013
ENSSSCG00000030149	CAPNS1	calpain small subunit 1	222.513	0.728905	0.208219	3.50067	0.000464092	0.0434036	296.533	280.328	299.953	244.259	229.248	143.071	95.0311	108.131	201.89	276.717	189.11	129.145	130.637	192.588	215.486	219.474	100.89	340.713	275.321	101.302	73.0984	155.81	185.015	283.614	183.358	229.957	188.701	387.394	224.47	341.054	121.186	350.27	431.902	366.491	261.546	309.018	292.316	80.4191	142.567
ENSSSCG00000026617	EIF2S2	eukaryotic translation initiation factor 2 subunit beta	249.949	0.730101	0.171286	4.26246	2.02193e-05	0.00661845	261.352	320.614	248.973	285.169	338.361	146.82	136.295	140.863	202.675	311.069	200.797	108.22	178.348	200.818	196.148	297.469	120.586	228.58	304.819	105.068	81.8189	199.052	232.296	292.547	266.208	348.368	273.479	351.422	249.055	351.327	119.708	480.126	450.633	303.254	264.943	304.979	396.895	119.759	329.083
ENSSSCG00000031791	ARF4	ADP ribosylation factor 4	1532.96	0.748881	0.237719	3.15028	0.00163112	0.0746455	1372.1	2455.81	1971.63	1352.45	1663.15	1269.52	1067.43	1140.93	1377.09	1488.55	1561.75	939.65	1836.87	878.166	1649.3	1090.12	590.871	1998.28	2869.56	623.253	417.046	879.947	1030.94	1763.1	1438.34	2176.01	1736.59	2866.72	1350.03	1284.09	600.509	1305.4	2265.28	1776.41	1899.89	2101.52	2111.73	811.146	2774.16
ENSSSCG00000032710	E2F2	E2F transcription factor 2	966.351	0.758448	0.252147	3.00796	0.00263006	0.0959741	748.873	1272.39	853.621	801.361	1178.2	658.501	424.722	635.344	811.487	1469.46	810.623	425.033	1315.46	697.101	814.979	1099.19	432.903	1403.11	1337.27	348.344	226.477	664.422	925.073	1100.96	980.624	1522.18	1783.08	1909.3	693.185	1078.63	364.542	1530.94	1143.66	1240.32	920.506	1376.44	1054.61	555.326	1079.44
ENSSSCG00000010035	YWHAH	tyrosine 3-monooxygenase/tryptophan 5-monooxygenase activation protein eta	216.589	0.773076	0.238241	3.24493	0.00117481	0.0678623	226.17	208.148	169.539	217.787	247.984	188.054	117.122	101.117	164.183	349.236	128.552	93.1804	95.4217	134.153	133.988	228.544	126.615	349.339	262.21	105.821	86.1792	188.756	369.001	249	139.895	274.576	278.949	359.723	168.353	271.2	100.988	471.583	401.052	415.357	140.397	345.373	238.137	148.015	153.286
ENSSSCG00000007504	RBM38	RNA binding motif protein 38	2313.26	0.790639	0.262732	3.0093	0.00261855	0.0959741	2548.18	2625.34	3629.08	2165.84	1776.67	3371.23	1033.25	2051.57	3173.68	2690.84	3562.28	1314.99	2637.73	1260.87	2250.17	1440.19	1060.35	3036.23	4598.51	1090.98	611.462	1121.55	1617.85	2071.28	1867.53	3123.3	2562.5	4006.76	2447.79	1703.22	1012.34	2277.61	3162.14	2151.52	2297.3	2505.97	3176.42	1516.66	3666.01
ENSSSCG00000022351	GSTO1	glutathione S-transferase omega 1	221.927	0.790822	0.261679	3.02211	0.00251019	0.0959741	188.475	446.51	246.602	247.869	357.098	167.437	91.2799	157.229	221.529	423.664	247.543	169.359	185.163	142.383	196.148	223.102	74.3613	313.399	303.181	57.2414	44.885	163.36	194.265	285.847	123.597	217.944	259.805	622.598	221.263	201.345	75.8641	213.579	254.514	270.198	270.604	187.834	277.197	65.422	245.472
ENSSSCG00000033190		aquaporin 1 (Colton blood group)	801.868	0.794451	0.253817	3.13002	0.00174795	0.0780222	841.854	1163.28	1043.31	1001.1	880.62	560.413	342.612	414.405	743.143	1770.99	1139.97	523.445	772.461	310.28	523.521	778.136	313.523	1071.02	1009.51	205.994	167.229	374.08	652.69	787.197	480.805	1065.7	1165.02	1699	564.382	760.181	320.698	1474.55	1312.23	911.198	652.166	768.505	1222.19	280.597	1204.85
ENSSSCG00000035357	BCL2L1	BCL2 like 1	3728.26	0.806003	0.267385	3.01439	0.00257493	0.0959741	2790.68	5134.87	5126.47	4269.11	3796.92	2878.91	2215.31	2269	3143.04	4490.46	3840.63	2057.49	3833.91	1770.32	3362.14	4393.12	1432.96	4489.65	5249.12	1469.82	915.91	1773.62	2297.26	4813.63	3447.12	5316.47	4728.45	9635.05	3373.47	2868.14	1591.67	5638.5	6356.24	3193.51	3737.5	4253.04	5734.19	1292.57	6421.95
ENSSSCG00000013643	CDKN2D	cyclin dependent kinase inhibitor 2D	239.095	0.808434	0.185357	4.36151	1.29171e-05	0.00661845	288.995	238.363	216.962	216.584	287.662	163.688	126.708	102.286	153.185	406.488	300.664	94.1612	266.953	228.801	255.544	212.219	90.0374	311.961	239.267	73.0581	40.5247	211.407	127.455	240.067	149.403	303.749	339.114	484.243	191.869	365.709	97.0469	334.892	499.112	306.128	364.579	192.379	338.936	120.411	344.09
ENSSSCG00000023585	SERINC2	serine incorporator 2	450.892	0.810747	0.243912	3.32394	0.000887561	0.0550551	540.294	817.483	513.358	508.973	685.539	347.993	168.388	173.01	478.408	919.847	788.312	250.443	302.169	282.297	454.455	890.594	139.88	899.943	689.941	147.246	85.6662	321.229	396.754	361.776	264.85	518.262	505.936	882.706	225.539	417.072	116.259	565.558	558.608	528.897	329.48	251.456	578.333	120.411	557.405
ENSSSCG00000001565	CDKN1A	cyclin dependent kinase inhibitor 1A	144.088	0.811713	0.269945	3.00695	0.0026388	0.0959741	255.069	199.754	206.292	244.259	148.791	57.4783	47.5155	35.0696	87.9831	181.298	183.798	35.9643	134.045	274.067	259.688	132.41	38.5875	214.204	255.655	53.0989	28.2134	241.608	95.5909	108.309	156.194	187.055	166.822	290.546	96.736	184.909	42.8583	107.644	117.892	214.146	206.066	54.0277	122.219	21.7349	131.848
ENSSSCG00000009613	DMTN	dematin actin binding protein	6145.9	0.823192	0.224147	3.67256	0.000240132	0.033687	5838.95	9027.56	5933.85	7822.3	7306.17	4768.2	2670.46	2969.22	5553.93	8958.01	8683.12	3054.35	5518.55	4313.47	6979.81	7329.72	2901.3	8624.22	9690.31	2526.15	1546.61	3852.69	4314.95	5595.24	5531.97	8716.06	9322.9	12595.8	5166.02	6480.03	2556.23	7538.5	8611.61	6407.13	5715.51	4165.18	10208.4	1346.69	9548.77
ENSSSCG00000033982	ZNHIT1	zinc finger HIT-type containing 1	923.303	0.823773	0.261539	3.14972	0.0016343	0.0746455	1078.08	1458.71	870.219	1146.69	858.577	447.956	522.254	396.871	751.784	1461.83	845.683	398.877	903.098	855.945	810.835	1235.22	348.091	1068.14	1332.36	419.143	204.932	706.978	726.696	1113.24	1100.15	1429.51	1211.51	2473.79	680.358	908.108	419.716	1864.12	1198.75	873.831	691.795	862.423	1307.86	167.141	857.546
ENSSSCG00000032067		adenylate kinase 2	2339.83	0.841641	0.236789	3.5544	0.000378848	0.0434036	2339.6	4166.31	2451.79	2766.26	2879.93	1725.6	1424.22	1415.06	1816.22	4229.01	2294.82	1314.33	1955.01	1809.83	2146.57	2575.65	1053.12	4357.39	4059.34	861.257	515.792	2004.93	1342.38	2865.17	1898.77	3729.08	3506	4615.53	1451.57	2120.29	752.73	2756.03	2620.06	2726.41	2407.13	2183.83	2613.21	658.132	2844.91
ENSSSCG00000010340	PRXL2A	peroxiredoxin like 2A	3778.4	0.843154	0.263786	3.19636	0.00139175	0.0735613	3993.15	5504.16	4219.5	4296.79	5098.56	1751.84	1750.57	1631.32	2445.46	6583.97	3894.82	1719.75	2276.49	1663.33	2962.93	4514.64	1102.96	3776.6	5499.86	962.936	579.914	1789.41	2598.43	2798.18	3561.21	4894.31	4867.93	10094.4	2285.32	5639.72	1355.21	5939.22	8655.68	4801.76	4617.25	3571.38	6405.76	764.416	6488.41
ENSSSCG00000047087		-	414.387	0.843468	0.27965	3.01616	0.00256002	0.0959741	549.09	780.553	563.153	620.875	589.652	341.121	217.571	261.853	405.351	1141.22	536.52	189.957	530.499	344.024	407.49	480.667	188.516	652.675	629.305	248.925	114.649	288.282	480.01	649.856	503.894	725.909	579.776	315.45	322.81	166.418	177.345	181.115	273.244	494.404	344.199	360.521	185.218	91.7212	227.25
ENSSSCG00000002655	MAP1LC3B	microtubule associated protein 1 light chain 3 beta	1178.68	0.851688	0.247299	3.44396	0.000573256	0.0455338	1379.63	1836.4	1353.94	1212.87	2030.17	1138.94	735.241	711.912	1010.23	1442.75	996.546	495.981	1209.81	981.867	1058.09	1028.45	395.522	1683.44	2730.26	539.274	314.708	875.142	726.696	884.34	1393.52	1856.82	1435.77	2374.17	1011.72	1109.45	474.89	1196.04	1617.43	1264.75	1269.23	998.249	1549.78	347.541	1297.04
ENSSSCG00000003217	ASPDH	aspartate dehydrogenase domain containing	1450.44	0.866743	0.25647	3.37951	0.000726149	0.0497587	1708.84	2229.19	1734.51	1857.81	1569.47	1005.25	715.234	808.938	1568.77	3343.51	1767.86	910.225	1160.96	816.44	1040.13	1465.58	545.048	1985.34	1679.78	581.452	336.253	967.118	1314.63	1683.82	931.729	1946.05	2029.21	3674.71	1182.74	1078.63	630.559	2128.96	1631.75	1652.8	1245.46	1595.58	1932.82	314.504	1795.49
ENSSSCG00000001907	UBL7	ubiquitin like 7	223.498	0.871203	0.244902	3.55736	0.000374605	0.0434036	187.218	416.295	237.117	221.397	386.856	164.938	119.206	132.68	223.886	381.679	316.6	130.779	206.747	144.029	168.521	199.522	85.616	307.648	345.79	69.6688	58.7352	157.869	194.265	311.529	137.179	353.516	314.501	478.709	183.317	215.727	90.1502	251.169	293.077	205.523	204.934	220.15	288.537	65.8567	245.472
ENSSSCG00000034876	PET100	PET100 homolog	121.16	0.876999	0.256134	3.42398	0.000617117	0.0455338	125.65	206.469	94.8468	115.512	166.425	83.0936	41.2635	52.0199	107.622	278.626	130.677	43.8111	96.5576	101.232	69.066	116.086	33.3621	136.573	219.601	38.412	22.3142	119.431	100.73	128.408	122.238	147.584	155.883	251.806	80.7024	147.927	59.6075	201.619	203.831	186.839	133.604	130.272	123.479	35.2105	116.841
ENSSSCG00000013012	SNX15	sorting nexin 15	281.301	0.889164	0.293576	3.02874	0.00245578	0.0959741	373.18	481.761	331.964	339.315	202.796	186.804	147.965	187.038	253.737	461.832	329.349	117.702	311.256	269.129	294.221	257.565	139.88	334.963	691.58	145.363	47.1933	193.561	136.705	314.879	377.581	580.041	289.888	368.025	205.764	345.163	79.3125	288.759	451.735	297.505	187.951	199.953	419.575	47.8167	281.918
ENSSSCG00000013736	PRDX2	peroxiredoxin 2	6358.2	0.898815	0.239934	3.7461	0.000179605	0.0293954	7644.53	9688.93	7669.55	6619.05	9355.08	4623.25	2457.05	3871.68	8028.46	11475.2	7518.71	3240.39	5019.86	4158.74	5711.76	6747.48	2691.48	5795	8593.94	2247.1	1329.88	3107.96	3402.21	5393.14	6041.3	8961.46	8661.08	12474.1	5751.78	6065.01	2556.72	10004.1	10067.1	6290.72	6658.66	6004.14	10682.2	2147.84	9213.26
ENSSSCG00000027237	GATA1	GATA binding protein 1	389.451	0.908206	0.226527	4.00926	6.09094e-05	0.0119626	444.8	515.333	386.501	358.567	598.469	240.534	156.718	172.425	337.007	893.129	404.78	150.069	319.208	231.27	291.459	431.693	104.91	618.172	470.34	119.755	52.0666	234.744	325.831	322.695	344.984	492.52	412.953	996.157	254.934	601.981	151.236	686.871	614.8	534.646	472.141	358.501	434.695	107.153	544.542
ENSSSCG00000005901	GPT	glutamic--pyruvic transaminase	92.5297	0.9272	0.274621	3.37628	0.000734726	0.0497587	64.0814	149.396	106.703	110.699	117.93	46.8573	54.1844	54.3578	121.762	211.832	99.8671	66.3706	71.5662	55.1426	33.1517	114.272	40.9992	110.696	103.245	42.5545	30.7783	75.5025	43.1701	90.4439	99.149	85.8049	71.1046	143.889	129.338	80.1272	53.696	157.194	114.586	104.917	81.5208	182.785	138.598	38.9054	111.481
ENSSSCG00000040701	GYPC	glycophorin C (Gerbich blood group)	4381.75	0.93086	0.271377	3.43014	0.00060327	0.0455338	4882.75	7765.25	5371.89	5250.96	5293.64	2911.4	2176.96	2155.02	3842.98	9414.12	5326.95	2194.81	3161.41	2679.77	3663.26	4436.65	1298.31	6152.97	6863.35	1289.06	667.375	2352.93	2655.99	4281.01	3220.3	6387.32	6968.25	10434.7	2640.2	4172.78	1441.42	6354.41	7856.88	5807.81	4318.34	3069.98	6218.03	671.391	5237.46
ENSSSCG00000014726	HBE1	hemoglobin subunit epsilon 1	4030.03	0.931846	0.289789	3.2156	0.00130173	0.0710167	4110	8728.77	4527.75	4624.07	4094.5	1182.05	1906.87	1631.9	2526.37	8969.46	2222.57	1090.05	2294.66	4313.47	2874.53	4817.55	1750.1	4790.11	3846.3	732.464	570.167	4031.83	2372.3	5100.59	2371.43	4446.41	9708.51	8561.41	2320.59	4752.16	1596.1	6479.14	7653.05	5422.64	3470.3	2809.44	7314.21	1109.57	6047.84
ENSSSCG00000021397	PODXL2	podocalyxin like 2	317.864	0.943148	0.297242	3.173	0.00150875	0.0740795	248.787	627.8	215.776	391.055	341.667	201.799	116.288	139.109	255.308	776.717	307.038	115.413	349.879	232.093	180.953	328.305	153.144	484.474	468.701	115.613	56.1703	286.223	338.166	451.103	305.596	545.719	661.819	799.693	161.939	328.727	91.6281	439.119	265.532	229.955	311.364	216.111	440.995	58.9015	358.025
ENSSSCG00000013654		intercellular adhesion molecule 4 (Landsteiner-Wiener blood group)	1481.01	0.951051	0.264953	3.58951	0.000331305	0.0433789	2024.22	2984.57	1789.05	1458.33	1518.77	679.118	613.534	515.523	1018.09	2900.76	1328.02	598.97	1153.01	848.537	1000.08	1672.36	444.56	2343.3	1989.52	431.947	194.416	1204.61	1306.41	2190.75	1326.97	2680.54	2614.46	3298.39	853.521	2001.12	438.928	2274.19	1691.25	1889.95	1353.02	1115.9	2043.7	260.384	1708.66
ENSSSCG00000016564	UBE2H	ubiquitin conjugating enzyme E2 H	4400.85	0.953288	0.257966	3.6954	0.000219541	0.0331675	3828.55	6521.4	4900.02	3787.82	4945.36	3739.84	3013.07	2495.78	3088.83	3524.81	4235.85	1957.77	4573.42	2990.05	4957.56	2724.38	1621.08	5587.99	9898.44	1838.13	1077.5	3246.61	3022.93	4546.76	5609.39	8654.28	7280.01	7357.72	4018.55	5008.98	1846.85	4468.08	6239.45	5332.09	4785.95	5374.99	6100.85	1276.06	6156.11
ENSSSCG00000000645	GABARAPL1	GABA type A receptor associated protein like 1	1989.99	0.977722	0.29784	3.28271	0.00102814	0.0611897	2210.18	1744.07	2897.57	2330.69	2851.27	1222.66	967.4	767.439	1388.88	845.419	2148.2	404.108	1616.49	1363.75	1838.54	1518.18	659.203	2783.21	5334.34	948.249	338.817	1562.21	1572.62	1931.7	2482.8	3265.73	3147.74	4305.61	1905.86	2453.12	890.172	1708.64	2834.91	3054.1	2148.98	1860.67	2914.35	603.795	2788.1
ENSSSCG00000038844	SMIM5	small integral membrane protein 5	145.055	0.978949	0.279007	3.50869	0.000450311	0.0434036	109.315	219.898	145.827	196.129	143.28	87.4669	30.8434	90.5964	109.979	219.466	191.235	58.5238	129.501	101.232	92.5485	116.086	57.8812	103.508	165.52	33.5163	22.8272	106.39	161.374	144.04	120.88	231.673	191.435	332.052	154.991	147.927	41.873	307.554	260.023	215.583	143.794	177.736	284.757	48.0341	161.862
ENSSSCG00000006996		FSHD region gene 1	130.356	0.986795	0.28549	3.4565	0.000547237	0.0455338	113.085	151.075	125.672	126.341	192.877	151.193	78.359	103.455	123.333	143.13	88.1805	65.3897	115.869	97.1168	103.599	152.362	46.2246	145.199	247.461	54.2287	39.4988	68.6386	92.5073	91.5605	160.268	245.402	213.314	224.135	164.077	141.763	56.1591	158.903	182.897	160.969	105.298	174.706	194.038	44.1218	141.495
ENSSSCG00000004714	EPB42	erythrocyte membrane protein band 4.2	2519.4	1.02735	0.292839	3.50823	0.000451098	0.0434036	1849.56	3321.97	3141.8	1407.8	4956.38	3144.44	1434.22	1998.97	2473.74	2606.87	2722.97	1291.45	3290.91	1424.65	2602.41	1746.73	973.932	4045.43	5798.12	941.47	514.254	1181.27	1943.68	2431.94	2451.56	3917.85	3295.42	3616.6	2360.14	2249.72	793.617	2646.68	4072.22	2630.11	2263.33	3076.04	3223.04	1013.93	3401.24
ENSSSCG00000016346	MAD2L1BP	MAD2L1 binding protein	291.73	1.03305	0.311067	3.32098	0.000897028	0.0550551	188.475	288.721	263.2	253.885	308.603	196.801	175.057	131.511	216.815	412.214	259.229	109.855	285.129	134.976	194.766	252.123	69.1359	458.597	549.003	76.4474	67.7122	181.892	298.079	304.829	266.208	494.236	522.345	738.816	207.902	302.018	69.46	680.037	407.663	388.05	229.843	400.915	476.274	139.321	377.32
ENSSSCG00000007975	HBZ	hemoglobin subunit zeta	1064.82	1.09226	0.268926	4.06158	4.87407e-05	0.0119626	1216.29	1948.87	1344.45	1631.6	983.121	814.067	403.882	518.445	763.568	2723.28	1245.15	322.371	956.489	725.907	606.4	1389.4	313.121	1956.59	1134.06	357.006	191.595	804.444	803.786	1224.9	649.222	1136.06	1550.63	2661.95	835.35	811.544	368.483	1626.62	1419.11	1484.65	636.315	1247.18	1338.1	221.913	1161.97
ENSSSCG00000008195	COX5B	mitochondrial cytochrome c oxidase subunit Vb	799.292	1.11675	0.27747	4.02475	5.70355e-05	0.0119626	1123.31	1737.36	885.632	1044.42	1061.37	471.697	596.445	511.431	833.483	1452.29	549.269	363.24	907.642	783.519	519.377	634.843	306.69	1395.92	883.321	252.314	174.154	470.861	551.96	764.865	630.207	942.138	1350.99	2083.63	765.871	747.854	279.81	1189.21	1199.85	758.853	524.224	700.845	853.01	164.098	706.403
ENSSSCG00000000033	TSPO	translocator protein	517.089	1.1265	0.259526	4.3406	1.42094e-05	0.00661845	572.963	619.407	637.845	587.184	643.657	283.643	280.925	125.666	608.812	1177.48	740.504	181.456	814.492	622.206	495.894	496.992	199.771	921.508	509.671	147.246	90.0264	1168.23	421.422	562.762	336.835	676.143	924.359	810.761	331.895	474.599	153.699	447.662	350.37	495.841	670.282	225.199	410.755	162.577	785.726
ENSSSCG00000024061	TNNI1	troponin I1, slow skeletal type	2766.47	1.16503	0.263342	4.42402	9.68828e-06	0.00661845	2460.22	2563.24	3356.39	3298.1	3365.98	2001.74	1399.62	1237.96	2980.43	6979	3499.6	1103.45	2298.07	1734.11	2378.63	2956.56	1341.32	3440.2	3661.11	1109.05	456.031	1717.34	1732.97	2544.71	2102.5	4616.3	4356.52	6151.27	2347.32	2993.47	1107.42	4165.65	3989.59	2995.17	2725.29	2649.37	3659	541.633	3876.11
ENSSSCG00000037449	CSF1	colony stimulating factor 1	174.253	1.22064	0.30173	4.04547	5.22192e-05	0.0119626	276.43	245.077	202.735	269.527	307.501	4.99811	34.5947	21.6262	19.6391	278.626	277.29	14.0588	143.132	283.943	196.148	319.235	31.3523	323.462	209.768	6.02541	6.15565	347.311	331.998	182.004	202.373	133.856	243.396	224.135	17.6369	174.636	4.92624	254.587	210.442	333.435	280.794	35.8501	128.518	12.8236	205.811
ENSSSCG00000022230	CD9	CD9 molecule	219.126	1.22538	0.310879	3.94167	8.09164e-05	0.0144473	204.809	107.431	214.591	176.877	163.119	238.66	193.397	146.123	274.947	198.473	159.362	68.6592	172.668	139.091	117.412	270.262	137.87	324.9	383.483	82.0962	46.6804	167.478	114.092	188.704	192.865	312.33	385.606	581.091	161.405	302.018	88.6723	575.81	323.927	296.068	328.348	258.525	127.258	116.064	204.739
ENSSSCG00000015287	TMCC2	transmembrane and coiled-coil domain family 2	14837.6	1.29986	0.367377	3.53821	0.000402851	0.0434036	9029.19	17519.6	12538.7	10404.5	12743.1	8487.42	11167	7644	8336.4	15248.1	7517.65	5383.54	20226	6143.05	10539.5	15749.6	5094.35	27288.7	28921.8	3473.27	2098.56	11356.3	14673.7	20702.7	12447.9	27198.4	30933.2	37793.1	10699.7	16849.3	3324.23	24001.2	20819.5	22031.2	10080.3	32104.5	15374.3	6753.03	15969.6
ENSSSCG00000022714	OSER1	oxidative stress responsive serine rich 1	149.965	1.46679	0.34032	4.31002	1.63236e-05	0.00661845	182.192	181.29	109.074	133.56	130.054	172.435	102.95	60.2028	120.977	206.107	127.49	56.8891	224.922	71.6031	92.5485	166.873	50.2441	355.09	263.849	41.0481	27.9569	166.105	68.8666	113.892	86.9251	195.635	325.44	351.422	132.01	147.927	29.5574	234.083	187.305	199.774	93.9754	264.584	163.798	84.5487	125.416
ENSSSCG00000050793	sscmir10390	ssc-mir-10390	308.18	1.47019	0.454772	3.23281	0.00122579	0.0687845	0	0	0	0	0	0.624764	0	0	3.14225	3.81679	0	0.653897	0	0	0	0	0	1.43761	0	0.376588	0	0.686386	0	0	1.35821	0	2.73479	1690.7	839.625	671.836	439.913	1221.67	1463.18	995.994	989.572	1233.55	1462.84	309.287	686.037

## Sheet: HighCONvsSE
ENSID	GeneName	GeneDescription	baseMean	log2FoldChange	lfcSE	stat	pvalue	padj	IAIPSBlood1	IAIPSBlood2	IAIPSBlood3	IAIPSBlood4	IAIPSBlood5	IAIPSBlood6	IAIPSBlood7	IAIPSBlood8	IAIPSBlood9	IAIPSBlood10	IAIPSBlood11	IAIPSBlood12	IAIPSBlood13	IAIPSBlood14	IAIPSBlood15	IAIPSBlood16	IAIPSBlood17	IAIPSBlood18	IAIPSBlood19	IAIPSBlood20	IAIPSBlood21	IAIPSBlood22	IAIPSBlood23	IAIPSBlood24	IAIPSBlood25	IAIPSBlood26	IAIPSBlood27	IAIPSBlood28	IAIPSBlood29	IAIPSBlood30	IAIPSBlood31	IAIPSBlood32	IAIPSBlood33	IAIPSBlood34	IAIPSBlood35	IAIPSBlood36	IAIPSBlood37	IAIPSBlood38	IAIPSBlood39
ENSSSCG00000000002	GTSE1	G2 and S-phase expressed 1	8.43542	-1.50319	0.593467	-2.53289	0.0113127	0.0357541	6.28249	20.1433	3.55676	4.81298	3.30646	5.62288	2.50082	8.76739	3.92782	30.5343	4.24966	2.61559	0	0.823024	11.0506	5.44151	4.01953	2.87522	24.5822	2.63612	1.28243	0	11.3064	6.69955	2.71641	1.7161	8.20437	35.9723	1.60336	12.3273	0.985248	17.0864	26.443	8.62333	13.5868	6.56411	15.1198	4.56433	6.43159
ENSSSCG00000000003	TTC38	tetratricopeptide repeat domain 38	29.051	1.06218	0.249559	4.25625	2.07888e-05	0.000165058	26.3865	23.5005	27.2685	4.81298	33.0646	45.6078	43.7643	57.2803	36.1359	1.9084	15.9362	45.4459	32.9432	28.8058	31.7704	25.3937	47.8324	28.7522	19.6658	41.4247	44.6285	21.9644	35.9751	35.7309	16.2985	8.58049	16.4087	11.0684	27.7915	18.4909	65.519	27.3382	16.5269	11.4978	20.3802	42.4142	17.6398	52.3811	24.6544
ENSSSCG00000000018	KIAA0930	KIAA0930 ortholog	73.6204	-0.67186	0.208331	-3.22496	0.00125989	0.00576624	91.7243	85.6091	58.0937	92.6499	46.2904	63.1012	27.0922	68.9701	113.907	99.2366	114.741	62.1202	42.031	54.3196	59.3968	74.3674	49.0382	221.392	77.0243	47.8267	38.4728	93.3485	50.3651	46.8968	44.8208	41.1863	43.7567	110.684	60.3932	59.5817	90.1502	117.896	105.772	93.4194	81.5208	58.0671	51.6594	67.8128	66.4598
ENSSSCG00000000019	NUP50	nucleoporin 50	212.546	-0.524697	0.122128	-4.2963	1.73674e-05	0.000140457	184.705	236.684	228.818	211.771	255.7	139.322	128.375	170.087	175.966	255.725	213.546	144.838	177.212	238.677	238.969	241.24	117.37	140.886	216.323	149.505	126.447	158.555	197.349	183.121	222.746	279.724	199.64	320.984	198.816	184.909	163.059	341.727	318.418	215.583	257.017	177.231	355.316	176.705	346.234
ENSSSCG00000000022	RTL6	retrotransposon Gag like 6	32.1193	0.575115	0.224267	2.56442	0.0103348	0.0331531	17.591	21.8219	26.0829	10.8292	33.0646	40.6097	49.5996	42.0835	43.9915	36.2595	16.9986	49.3692	27.2633	16.4605	23.4825	41.7183	39.3914	30.1898	42.6092	33.8929	46.9369	24.7099	34.9472	26.7982	48.8954	18.8771	30.0827	13.8355	29.3949	55.4727	43.3509	35.8813	27.5448	15.8094	26.0414	50.9981	13.8598	38.036	27.8702
ENSSSCG00000000024	PARVB	parvin beta	399.721	-1.4288	0.251205	-5.68777	1.28707e-08	2.32046e-07	605.632	590.87	739.805	732.776	516.91	176.808	127.542	109.885	254.523	656.488	601.327	168.379	408.95	335.794	552.528	515.13	141.487	485.912	917.736	162.686	75.4068	385.749	87.368	713.502	460.432	569.744	377.401	592.16	191.334	567.054	166.014	331.475	462.753	504.465	455.158	188.844	367.916	98.2417	192.948
ENSSSCG00000000025	-	parvin gamma	82.0944	1.05989	0.24038	4.40922	1.03743e-05	8.89135e-05	45.2339	33.5722	52.1657	108.292	73.8443	103.711	138.795	101.702	187.75	40.0763	64.8073	131.76	131.773	81.4793	59.3968	56.229	129.429	38.8155	63.9138	90.3812	137.22	94.0349	68.8666	33.4977	57.0446	46.3346	60.1654	41.5065	94.5982	67.7999	141.383	44.4245	89.2451	40.2422	40.7604	121.184	47.8794	134.104	108.265
ENSSSCG00000000029	SCUBE1	signal peptide, CUB domain and EGF like domain containing 1	2.39338	1.62522	0.755518	2.15114	0.0314655	0.081234	0	0	1.18559	0	0	4.99811	1.66721	1.75348	3.14225	0	2.12483	4.25033	0	0.823024	2.76264	1.81384	6.02929	0	0	1.12976	3.33431	3.43193	0	10.0493	1.35821	0	0	2.7671	2.13781	2.05454	2.95574	0	7.71254	1.43722	3.3967	5.55424	1.25998	4.56433	9.64739
ENSSSCG00000000033	TSPO	translocator protein	517.089	-1.10996	0.221762	-5.00517	5.58132e-07	6.89896e-06	572.963	619.407	637.845	587.184	643.657	283.643	280.925	125.666	608.812	1177.48	740.504	181.456	814.492	622.206	495.894	496.992	199.771	921.508	509.671	147.246	90.0264	1168.23	421.422	562.762	336.835	676.143	924.359	810.761	331.895	474.599	153.699	447.662	350.37	495.841	670.282	225.199	410.755	162.577	785.726
ENSSSCG00000000034	TTLL12	tubulin tyrosine ligase like 12	70.8271	0.420573	0.147995	2.8418	0.00448603	0.0168361	66.5944	52.0369	56.9081	39.7071	76.0486	74.9717	86.2782	68.3857	96.6243	83.9694	49.9335	85.3336	53.3907	71.6031	44.2023	72.5535	86.0179	34.5026	57.3585	98.6661	96.1821	89.2302	86.3402	49.13	43.4626	46.3346	71.1046	77.4789	111.701	76.0181	107.885	73.4713	76.0236	43.1166	64.5373	92.4024	69.2992	86.2875	47.165
ENSSSCG00000000036	PACSIN2	protein kinase C and casein kinase substrate in neurons 2	166.985	-0.826451	0.169493	-4.87603	1.08242e-06	1.23073e-05	201.04	229.969	211.034	253.885	167.527	113.082	121.29	101.117	111.55	156.488	281.54	98.0846	109.053	220.57	259.688	139.666	101.292	255.894	129.466	96.7832	99.0034	312.306	114.092	175.305	203.731	178.474	175.027	213.067	105.822	149.982	100.003	146.943	143.233	196.899	241.166	88.8679	170.098	94.9814	244.401
ENSSSCG00000000037	ARFGAP3	ADP ribosylation factor GTPase activating protein 3	39.4853	0.564224	0.166727	3.38412	0.000714068	0.00359319	26.3865	30.215	18.9694	20.4552	44.0861	59.3526	56.2684	51.4354	60.4884	32.4427	21.2483	64.4089	21.5835	27.1598	30.3891	27.2076	45.8226	33.065	31.1375	58.7478	62.0695	37.0648	48.3094	34.6143	28.5223	24.0254	43.7567	49.8078	54.5142	22.6	68.4747	52.9677	31.952	41.6794	38.4959	39.8896	18.8998	58.9015	22.5106
ENSSSCG00000000039	POLDIP3	DNA polymerase delta interacting protein 3	56.7439	0.539952	0.147304	3.66557	0.000246787	0.00143424	42.7209	30.215	40.3099	45.7233	55.1077	74.3469	67.1053	75.9841	75.4141	47.7099	53.1208	72.9095	52.2547	46.9124	45.5836	76.1812	88.4296	31.6274	45.8868	79.4601	73.3549	48.047	52.4208	31.2646	74.7013	51.4829	51.961	30.4381	73.22	53.4181	84.2387	71.7627	38.5627	63.2377	46.4216	58.572	35.2796	67.5955	60.0282
ENSSSCG00000000040	SEPTIN3	septin 3	53.8605	0.927652	0.148337	6.25367	4.00911e-10	1.0083e-08	42.7209	38.608	39.1243	27.6746	44.0861	66.8497	78.359	91.7654	67.5584	32.4427	53.1208	86.3144	48.8468	40.3282	62.1594	48.9736	91.6453	17.2513	34.4151	115.236	94.6432	43.9287	61.6715	39.0807	55.6864	53.199	30.0827	30.4381	76.4268	53.4181	83.7461	32.4641	34.1555	51.74	30.5703	70.6904	37.7995	68.6822	24.6544
ENSSSCG00000000050	NAGA	alpha-N-acetylgalactosaminidase	43.4365	0.796105	0.188736	4.21808	2.46396e-05	0.000191555	26.3865	35.2508	28.454	34.8941	49.5969	46.8573	62.9373	72.4771	65.2018	24.8091	49.9335	66.3706	30.6712	42.7972	44.2023	36.2768	80.3906	33.065	45.8868	64.02	50.7841	42.5559	47.2815	51.3632	24.4477	10.2966	54.6958	44.2736	58.7898	26.7091	68.9674	30.7554	38.5627	18.6839	33.967	53.0178	31.4996	47.5994	19.2948
ENSSSCG00000000068	EP300	E1A binding protein p300	310.437	-0.516816	0.129827	-3.98079	6.86859e-05	0.000471624	354.332	266.899	286.912	389.851	231.452	252.405	275.09	292.246	219.958	236.641	386.719	184.726	341.928	292.996	243.112	382.72	238.358	393.905	326.124	268.131	243.405	411.832	427.589	288.081	240.402	279.724	344.584	445.503	244.245	351.327	247.297	283.633	293.077	482.906	304.571	315.077	280.977	362.755	395.543
ENSSSCG00000000071	ST13	ST13 Hsp70 interacting protein	2426.71	-1.33522	0.169243	-7.88935	3.03765e-15	1.67302e-13	1712.61	3808.76	2207.56	3136.86	3173.1	1140.19	1109.95	1100.02	1038.51	2858.78	2580.61	855.951	2182.2	2001.59	2257.08	4307.86	1045.48	2399.37	3248.13	1235.59	628.646	2019.35	1896.4	3044.94	2901.13	4463.57	3393.88	4206	1307.81	3796.8	1066.04	3067	3098.24	3427.77	2771.71	1461.78	4134.01	874.177	3682.09
ENSSSCG00000000075	MRTFA	myocardin related transcription factor A	33.7619	0.938268	0.19954	4.70215	2.57441e-06	2.61916e-05	27.643	20.1433	18.9694	48.1298	25.3495	57.4783	54.6012	59.6183	49.4905	17.1756	30.81	43.8111	36.3511	31.2749	48.3462	25.3937	51.8519	20.1265	14.7493	54.9819	56.4268	39.124	24.6686	35.7309	27.1641	24.0254	30.0827	16.6026	40.6184	14.3818	54.1886	10.2518	26.443	18.6839	20.3802	39.8896	37.7995	52.1637	11.7913
ENSSSCG00000000076	SGSM3	small G protein signaling modulator 3	48.693	-0.761994	0.306496	-2.48615	0.0129134	0.0395308	32.6689	90.6449	118.559	73.398	39.6775	33.7373	21.6738	26.3022	30.637	38.1679	59.4953	28.4445	38.6231	34.567	59.3968	45.3459	19.6957	43.1283	122.911	27.8675	14.3632	32.9465	14.39	73.695	70.6267	63.4956	38.2871	141.122	34.7394	20.5454	21.1828	76.8886	34.1555	43.1166	79.2563	27.7712	83.159	13.2583	31.086
ENSSSCG00000000078	TNRC6B	trinucleotide repeat containing adaptor 6B	101.46	-0.642997	0.212011	-3.03285	0.00242256	0.010077	71.6204	97.3593	80.6198	73.398	67.2313	87.4669	75.8582	87.0894	58.1317	101.145	96.6798	63.755	77.2461	80.6563	63.5408	130.596	64.7144	79.0685	111.439	83.9792	64.8908	67.2658	213.795	158.556	120.88	113.262	73.8394	229.669	74.8234	127.382	66.0116	114.479	187.305	176.778	78.1241	105.531	119.699	123.019	90.0423
ENSSSCG00000000084	ATF4	activating transcription factor 4	923.07	-0.521045	0.140776	-3.70123	0.000214558	0.00126496	942.373	904.77	850.064	848.288	875.11	692.863	539.76	551.761	754.141	1280.53	1046.48	461.325	895.146	749.775	1005.6	912.36	629.458	1374.35	1004.59	586.348	387.55	822.291	714.362	1138.92	778.252	1580.53	1288.09	1076.4	834.281	980.017	584.252	1383.99	1234.01	995.994	1046.18	1003.8	1180.61	560.108	1504.99
ENSSSCG00000000087	TAB1	TGF-beta activated kinase 1 (MAP3K7) binding protein 1	32.3496	0.952496	0.221806	4.29427	1.7527e-05	0.000141412	15.078	25.1791	32.0108	30.0811	26.4517	42.4839	59.186	37.4075	47.1338	20.9924	36.1221	52.6387	35.2151	31.2749	19.3385	18.1384	55.0675	18.6889	26.221	39.5418	41.5507	18.5324	49.3372	22.3318	25.8059	42.9024	5.46958	8.30131	51.8419	24.6545	55.6665	37.59	19.8323	44.5539	23.7769	32.8205	25.1997	44.9912	18.2228
ENSSSCG00000000094	SUN2	Sad1 and UNC84 domain containing 2	155.916	0.878038	0.120484	7.2876	3.15515e-13	1.32001e-11	104.289	102.395	93.6612	102.276	132.258	263.65	225.907	218.6	233.312	87.7862	113.678	223.306	95.4217	102.055	131.225	154.176	229.917	96.3198	137.66	222.187	246.996	124.922	175.764	128.408	149.403	111.546	120.331	160.492	216.453	145.873	235.474	170.864	116.79	90.5449	126.81	211.061	165.058	203.439	110.409
ENSSSCG00000000095	GTPBP1	GTP binding protein 1	85.552	-0.559927	0.138312	-4.04828	5.15962e-05	0.000367222	111.828	58.7513	77.063	90.2434	99.1938	84.3431	62.9373	70.1391	49.4905	112.595	80.7436	79.4485	93.1497	62.5498	87.0232	97.9472	61.9007	79.0685	111.439	61.3839	76.9457	99.526	124.371	88.2107	97.7908	78.9405	123.066	77.4789	67.8755	65.7454	90.6428	133.274	103.568	91.9822	72.4629	84.3235	61.7393	71.9425	95.402
ENSSSCG00000000107	-	casein kinase I	51.3714	0.748759	0.188531	3.97155	7.14079e-05	0.000488004	32.6689	26.8577	45.0522	36.0974	61.7206	77.4707	70.8565	73.0616	94.2676	61.0687	38.247	80.1024	37.4871	34.567	44.2023	70.7397	62.7046	23.0018	44.248	71.5517	75.9197	41.1832	53.4487	55.8296	59.761	34.322	24.6131	55.342	73.22	53.4181	75.3715	27.3382	44.0717	18.6839	49.8183	42.9192	30.2396	60.2056	41.8054
ENSSSCG00000000108	TMEM184B	transmembrane protein 184B	18.0523	0.660766	0.229843	2.87486	0.00404206	0.0154591	26.3865	8.39305	14.227	4.81298	15.4301	18.1182	28.7594	21.6262	27.4947	15.2672	11.6866	21.5786	19.3115	20.5756	19.3385	16.3245	34.166	12.9385	19.6658	25.2314	27.444	17.1597	20.5572	27.9148	12.2238	20.5932	10.9392	0	24.0504	8.21817	17.7345	13.6691	25.3412	21.5583	4.52893	19.1874	18.8998	23.039	9.64739
ENSSSCG00000000114	PICK1	protein interacting with PRKCA 1	13.0314	0.785999	0.312062	2.51873	0.0117779	0.0368379	0	13.4289	4.74234	3.60974	17.6345	14.3696	18.3393	19.2883	21.2102	15.2672	9.56174	16.3474	13.6317	16.4605	9.66925	7.25535	18.8918	4.31283	24.5822	21.0889	18.467	17.1597	19.5293	12.2825	6.79103	12.0127	19.1435	16.6026	17.6369	2.05454	14.2861	6.83454	13.2215	4.31166	3.3967	10.0986	16.3798	17.6053	10.7193
ENSSSCG00000000116	POLR2F	RNA polymerase II subunit F	32.7921	-0.759998	0.285816	-2.65905	0.00783615	0.0265841	31.4124	52.0369	41.4955	51.7395	46.2904	28.7391	18.7561	16.9503	18.068	124.046	42.4966	29.4254	14.7676	32.0979	30.3891	39.9044	13.6664	15.8137	32.7763	17.3231	11.2854	23.3371	34.9472	18.9821	16.2985	41.1863	30.0827	80.246	28.326	30.8181	17.2418	34.1727	27.5448	25.87	22.6447	37.3649	60.4793	15.2144	24.6544
ENSSSCG00000000119	EIF3L	eukaryotic translation initiation factor 3 subunit L	295.376	-0.896805	0.176825	-5.07171	3.94248e-07	5.05512e-06	276.43	382.723	271.499	375.413	422.125	191.803	195.897	172.425	256.094	515.267	372.908	221.017	204.475	222.216	176.809	449.832	163.595	362.278	349.067	150.259	150.814	341.82	243.603	426.538	198.298	418.728	415.688	503.613	199.885	371.872	218.725	514.299	320.621	258.7	236.637	220.655	349.016	150.405	247.616
ENSSSCG00000000136	CSF2RB	colony stimulating factor 2 receptor beta common subunit	518.613	-0.806652	0.36842	-2.18949	0.0285611	0.0751892	513.908	861.127	406.656	658.175	492.662	363.613	272.589	283.479	351.932	164.122	634.262	232.134	619.105	1193.38	776.302	306.539	262.877	1065.27	250.739	237.627	223.399	1615.75	339.193	219.969	335.477	336.355	916.155	431.668	436.114	271.2	356.66	187.95	372.406	403.859	1407.37	246.406	602.273	422.744	1154.47
ENSSSCG00000000141	EIF3D	eukaryotic translation initiation factor 3 subunit D	415.198	-0.842398	0.292921	-2.87586	0.00402931	0.0154236	306.585	1465.43	327.221	584.777	481.641	269.273	217.154	301.014	347.219	444.656	401.593	384.165	226.058	239.5	266.595	798.089	204.996	454.285	440.841	205.241	141.837	424.873	425.534	406.439	313.745	379.258	276.214	1242.43	458.026	273.254	195.079	367.357	252.31	515.962	601.216	182.28	713.151	227.564	429.845
ENSSSCG00000000145	-	-	436.111	-0.626016	0.218681	-2.86269	0.00420055	0.0159528	522.703	864.484	754.032	635.314	428.738	347.369	258.001	281.141	226.242	230.916	614.076	302.101	376.007	402.459	562.198	302.911	255.24	645.487	563.752	373.575	262.128	604.706	212.767	657.672	453.641	664.13	456.71	611.53	319.603	474.599	273.899	141.817	314.011	543.27	609.142	290.84	505.254	236.041	429.845
ENSSSCG00000000148	-	apolipoprotein L3-like	39.0825	0.530212	0.254332	2.08472	0.0370947	0.0922281	35.1819	16.7861	49.7946	19.2519	27.5538	44.983	37.5123	38.5765	53.4183	20.9924	30.81	49.6962	47.7108	41.1512	55.2528	34.4629	43.009	5.75044	34.4151	56.4882	62.839	39.8104	28.7801	63.6457	48.8954	75.5083	46.4914	13.8355	38.4806	22.6	40.8878	66.6368	34.1555	20.1211	18.1157	36.3551	55.4393	47.382	21.4386
ENSSSCG00000000156	FBXO7	F-box protein 7	372.99	-0.864092	0.204735	-4.22055	2.43711e-05	0.000189694	329.202	579.12	391.243	450.014	620.512	275.521	132.127	313.288	293.015	465.649	304.913	215.132	297.625	287.235	323.229	435.321	139.076	471.536	639.138	179.633	127.73	170.91	283.689	254.583	391.163	490.804	574.306	672.406	336.171	406.799	225.622	512.591	611.494	377.989	375.901	316.087	491.394	189.528	594.922
ENSSSCG00000000161	PWP1	PWP1 homolog, endonuclein	13.5169	0.657965	0.302489	2.17517	0.0296176	0.0773805	5.02599	1.67861	10.6703	4.81298	22.0431	15.6191	17.0889	14.6123	14.9257	3.81679	8.49932	17.6552	15.9036	17.2835	17.9572	14.5107	13.2644	8.62566	22.9434	19.206	17.441	3.43193	9.25073	13.3991	19.0149	6.86439	8.20437	16.6026	19.2403	20.5454	12.8082	29.0468	9.91613	10.0605	13.5868	16.1578	15.1198	12.8236	7.50353
ENSSSCG00000000162	BTBD11	BTB domain containing 11	28.5979	1.12065	0.245348	4.56759	4.93359e-06	4.64298e-05	25.13	26.8577	35.5676	7.21947	18.7366	34.362	41.2635	42.668	40.8493	15.2672	12.749	30.4062	21.5835	32.9209	20.7198	10.883	38.9894	15.8137	11.4717	47.4501	44.1155	15.1005	24.6686	43.5471	39.3879	48.0507	30.0827	8.30131	50.2386	10.2727	25.6165	39.2986	23.1376	18.6839	39.6282	38.8797	21.4197	38.2534	25.7264
ENSSSCG00000000164	CRY1	cryptochrome circadian regulator 1	19.7261	0.494419	0.23123	2.13821	0.0324999	0.0831479	18.8475	8.39305	21.3405	19.2519	17.6345	26.8648	20.8402	40.9145	29.0658	17.1756	16.9986	19.29	20.4475	18.1065	15.1945	14.5107	26.5289	25.877	26.221	21.8421	33.5996	12.3549	26.7243	15.6323	33.9551	18.8771	24.6131	11.0684	25.1193	14.3818	15.2713	10.2518	15.4251	17.2467	5.66117	20.1973	12.5998	24.5604	6.43159
ENSSSCG00000000167	RIC8B	RIC8 guanine nucleotide exchange factor B	12.4285	0.852938	0.258764	3.2962	0.000980006	0.00466862	6.28249	5.03583	10.6703	14.4389	8.81723	24.9906	22.9242	19.8728	13.3546	13.3588	6.37449	14.7127	11.3597	2.46907	5.52528	12.6969	22.1074	10.0633	1.63881	24.8548	19.4929	8.92302	18.5015	7.81614	16.2985	5.14829	19.1435	8.30131	19.7748	12.3273	22.6607	8.54318	5.50896	10.0605	9.05787	17.1677	7.55991	11.5195	5.35966
ENSSSCG00000000171	CKAP4	cytoskeleton associated protein 4	10.1825	1.84572	0.694357	2.65818	0.00785642	0.026597	5.02599	1.67861	2.37117	2.40649	0	22.4915	24.1746	17.5348	24.3525	5.72519	8.49932	10.7893	34.0792	13.1684	2.76264	3.62768	22.1074	18.6889	9.83289	19.9592	8.20754	14.4141	6.16715	2.23318	1.35821	0	0	0	14.4302	0	17.7345	1.70864	0	12.935	1.13223	15.6529	0	30.4288	21.4386
ENSSSCG00000000175	ADCY6	adenylate cyclase 6	52.7414	-1.31735	0.293382	-4.49023	7.11469e-06	6.39587e-05	35.1819	95.6807	94.8468	114.308	42.984	21.8667	18.3393	29.2246	37.707	41.9847	98.8046	18.3091	42.031	58.4347	52.4902	54.4151	14.0684	71.8805	117.995	24.4782	14.6197	63.8339	20.5572	71.4619	63.8356	60.0634	51.961	105.15	29.9294	73.9635	17.7345	56.385	47.377	102.043	56.6117	34.8403	74.3391	12.1715	15.0071
ENSSSCG00000000176	DDX23	DEAD-box helicase 23	50.6052	0.401958	0.196821	2.04226	0.0411261	0.0998919	40.2079	20.1433	27.2685	34.8941	71.64	71.2231	59.186	58.4493	46.3482	28.6259	49.9335	70.9479	30.6712	37.8591	60.7781	48.9736	77.9789	34.5026	42.6092	80.2133	68.9946	54.9109	65.783	46.8968	71.9849	39.4703	16.4087	49.8078	44.894	49.309	71.9231	61.5109	53.9878	35.9305	41.8926	55.0375	54.1794	49.9902	48.2369
ENSSSCG00000000185	PRKAG1	protein kinase AMP-activated non-catalytic subunit gamma 1	10.0912	-0.724355	0.285127	-2.54046	0.0110706	0.0351165	16.3345	15.1075	8.2991	9.62596	7.71507	4.99811	6.66885	9.93638	9.42676	7.63358	15.9362	6.86592	18.1756	13.1684	12.4319	12.6969	5.62734	12.9385	3.27763	8.28494	8.72051	13.0413	11.3064	6.69955	12.2238	6.86439	10.9392	5.5342	7.48234	18.4909	12.8082	11.9604	6.61075	7.18611	12.4546	7.06904	5.03994	13.2583	10.7193
ENSSSCG00000000189	LMBR1L	limb development membrane protein 1 like	38.9766	0.961615	0.21586	4.45481	8.39681e-06	7.38569e-05	35.1819	21.8219	29.6396	30.0811	18.7366	67.4745	51.6836	57.8648	77.7708	17.1756	20.1859	60.1585	79.5181	32.9209	34.533	36.2768	65.9203	35.9402	24.5822	45.9438	51.5536	25.3963	38.0308	23.4484	23.0895	39.4703	16.4087	19.3697	44.894	36.9818	61.578	20.5036	33.0538	38.805	30.5703	44.9389	39.0595	56.2934	33.2299
ENSSSCG00000000190	TUBA1B	tubulin alpha 1a	262.66	-0.842436	0.214351	-3.93017	8.4887e-05	0.000570965	383.232	429.724	199.178	322.47	317.42	173.06	126.708	162.489	266.306	645.038	211.421	232.46	277.177	240.323	247.256	257.565	129.831	293.272	344.151	135.948	140.811	283.477	158.29	315.995	374.865	260.847	207.844	556.188	230.349	203.4	183.749	201.619	337.148	215.583	404.207	117.649	273.417	186.051	197.236
ENSSSCG00000000209	NCKAP5L	NCK associated protein 5 like	12.0279	0.842024	0.235903	3.56936	0.000357855	0.00197592	16.3345	13.4289	5.92793	8.42272	7.71507	19.3677	18.7561	20.4572	19.6391	0	7.43691	25.502	9.08778	11.5223	8.28793	14.5107	19.6957	5.75044	6.55526	16.1933	17.6975	8.23663	14.39	4.46637	5.43282	3.4322	2.73479	19.3697	17.1025	14.3818	19.705	10.2518	9.91613	8.62333	7.92563	15.1479	8.81989	20.4308	6.43159
ENSSSCG00000000215	SMARCD1	SWI/SNF related, matrix associated, actin dependent regulator of chromatin, subfamily d, member 1	25.8049	0.691494	0.234209	2.95246	0.00315253	0.0125419	15.078	11.7503	28.454	21.6584	27.5538	24.9906	34.1778	25.7177	27.4947	28.6259	19.1235	48.7153	38.6231	28.8058	15.1945	30.8352	39.3914	5.75044	31.1375	32.3866	46.9369	19.9052	18.5015	14.5157	28.5223	20.5932	21.8783	16.6026	39.5495	18.4909	39.9025	29.0468	33.0538	12.935	18.1157	36.86	11.3399	32.385	11.7913
ENSSSCG00000000217	RACGAP1	Rac GTPase activating protein 1	14.0825	-1.45379	0.403447	-3.60343	0.000314045	0.00176008	7.53899	11.7503	13.0414	9.62596	9.91938	6.8724	6.66885	10.5209	1.57113	38.1679	16.9986	12.424	1.13597	14.8144	13.8132	19.9522	9.64687	14.3761	13.1105	13.5572	6.66862	6.17747	32.8915	31.2646	10.8656	17.161	5.46958	33.2052	5.34453	24.6545	15.2713	27.3382	14.3233	21.5583	11.3223	11.6134	15.1198	12.3889	1.07193
ENSSSCG00000000233	ACVR1B	activin A receptor type 1B	87.2689	-4.81058	0.471019	-10.2131	1.73173e-24	2.8613e-22	162.088	152.753	88.9189	160.032	103.602	4.37335	5.41844	4.67594	3.92782	57.2519	213.546	3.92338	141.997	234.562	232.062	103.389	4.42148	232.893	103.245	5.27223	1.28243	272.495	64.7551	40.1973	134.462	53.199	98.4525	16.6026	2.13781	51.3636	3.44837	18.795	94.7541	103.48	139.265	3.02959	54.1794	14.5624	218.674
ENSSSCG00000000240	KRT85	keratin, type II cuticular Hb5	3.44629	2.18759	0.732051	2.9883	0.00280531	0.0113755	0	0	1.18559	0	5.51077	0	8.75286	4.09145	8.6412	0	1.06242	3.26949	3.40792	0	1.38132	0	6.8332	0	0	7.15517	13.8502	2.05916	0	0	2.71641	0	10.9392	0	6.41343	4.10909	10.3451	5.12591	0	1.43722	2.26447	9.08876	0	13.693	1.07193
ENSSSCG00000000257	ITGB7	integrin subunit beta 7	309.554	1.27397	0.154761	8.23185	1.84338e-16	1.17949e-14	255.069	208.148	265.571	168.454	243.576	529.175	451.814	479.284	502.761	175.572	293.227	493.039	452.117	269.129	247.256	96.1334	560.322	169.638	278.598	503.122	552.213	293.087	242.575	180.888	309.671	240.254	194.17	196.464	451.078	178.745	540.409	172.572	211.544	137.973	217.389	326.691	206.638	487.731	290.494
ENSSSCG00000000258	RARG	retinoic acid receptor gamma	24.0352	1.98964	0.213629	9.3135	1.23685e-20	1.37988e-18	23.8735	8.39305	17.7838	9.62596	12.1237	63.7259	41.6803	47.3439	56.5606	3.81679	18.0611	46.4267	13.6317	12.3454	11.0506	14.5107	62.7046	14.3761	16.3881	45.1906	46.9369	9.60941	19.5293	10.0493	12.2238	13.7288	8.20437	5.5342	48.1008	18.4909	53.2034	10.2518	5.50896	17.2467	14.719	31.3057	15.1198	39.7748	18.2228
ENSSSCG00000000259	CSAD	cysteine sulfinic acid decarboxylase	5.07818	1.15947	0.505523	2.2936	0.0218132	0.0602343	2.513	3.35722	4.74234	4.81298	4.40861	11.2458	5.00164	1.16899	11.7834	0	2.12483	9.48151	5.67986	6.58419	4.14396	0	5.62734	8.62566	6.55526	6.02541	8.20754	3.43193	8.22287	2.23318	5.43282	0	5.46958	0	10.1546	0	4.43362	5.12591	8.81433	0	0	9.08876	15.1198	5.21637	3.2158
ENSSSCG00000000261	-	insulin like growth factor binding protein 6	0.884837	-4.11365	1.37274	-2.99666	0.00272954	0.0111263	2.513	0	0	1.20325	3.30646	0	0	0	0	0	2.12483	0	0	4.11512	1.38132	3.62768	0	1.43761	0	0	0	2.05916	7.19501	0	0	0	2.73479	0	0	0	0	1.70864	1.10179	0	0	0	0	0	0
ENSSSCG00000000263	TNS2	tensin 2	3.20463	-2.93593	0.999746	-2.93668	0.00331745	0.0131101	5.02599	5.03583	0	2.40649	23.1452	1.24953	0.416803	1.16899	0	11.4504	6.37449	0	0	1.64605	1.38132	23.5799	0.401953	0	0	1.12976	0.512971	2.74554	13.3622	0	1.35821	0	0	0	0	2.05454	0	5.12591	2.20358	1.43722	6.7934	2.01973	2.51997	0.434698	0
ENSSSCG00000000264	MFSD5	major facilitator superfamily domain containing 5	17.3895	0.824281	0.279826	2.94569	0.0032223	0.0127728	16.3345	5.03583	7.11351	10.8292	11.0215	16.8686	20.0065	22.7952	36.9215	17.1756	13.8114	33.3488	22.7194	18.1065	15.1945	19.9522	25.725	14.3761	8.19407	20.7123	21.0318	15.7869	15.4179	13.3991	25.8059	0	0	33.2052	25.1193	10.2727	24.1386	11.9604	9.91613	8.62333	15.8513	24.7416	26.4597	25.2125	15.0071
ENSSSCG00000000265	ESPL1	extra spindle pole bodies like 1, separase	11.9744	-0.869272	0.365334	-2.37939	0.0173413	0.0502903	3.76949	5.03583	1.18559	10.8292	16.5323	8.74669	4.58483	3.50696	3.92782	9.54198	7.43691	6.21202	17.0396	11.5223	6.9066	19.9522	6.43125	15.8137	8.19407	10.1679	11.5419	6.86386	30.8358	8.93273	6.79103	8.58049	10.9392	5.5342	11.758	22.6	3.44837	34.1727	25.3412	22.9955	13.5868	20.7022	10.0799	16.7359	18.2228
ENSSSCG00000000274	PCBP2	poly(rC) binding protein 2	680.213	-0.653709	0.192652	-3.39321	0.000690792	0.00349764	501.343	1190.13	635.474	703.899	961.078	482.942	347.197	506.171	590.744	1091.6	777.688	489.115	660	619.737	700.33	955.893	362.16	461.473	1111.12	399.937	290.085	630.789	454.314	1078.63	480.805	1283.64	760.272	1037.66	503.989	562.945	469.471	854.318	861.601	556.205	722.365	496.348	866.87	391.445	678.533
ENSSSCG00000000275	MAP3K12	mitogen-activated protein kinase kinase kinase 12	5.52256	0.932829	0.403638	2.31105	0.02083	0.0580227	2.513	5.03583	4.74234	0	6.61292	4.37335	11.2537	4.67594	7.85563	1.9084	1.06242	8.17372	5.67986	0	2.76264	5.44151	6.02929	1.43761	1.63881	7.90835	9.74645	2.74554	6.16715	6.69955	4.07462	8.58049	5.46958	5.5342	9.0857	2.05454	5.41886	11.9604	4.40717	7.18611	2.26447	8.0789	8.81989	13.693	4.28773
ENSSSCG00000000276	TARBP2	TARBP2 subunit of RISC loading complex	20.8499	0.785015	0.281354	2.79014	0.00526858	0.0191413	16.3345	1.67861	24.8973	21.6584	12.1237	23.1163	29.1762	36.2386	36.1359	24.8091	20.1859	24.5211	28.3993	22.2216	19.3385	19.9522	23.7152	12.9385	27.8598	28.9973	30.0088	9.60941	10.2786	18.9821	25.8059	1.7161	16.4087	33.2052	36.8772	14.3818	19.2123	13.6691	8.81433	20.1211	30.5703	21.2071	16.3798	21.9522	9.64739
ENSSSCG00000000289	NFE2	nuclear factor, erythroid 2	695.397	-1.06261	0.176732	-6.01255	1.82626e-09	3.97966e-08	681.022	829.233	699.495	667.801	742.851	343.62	298.431	391.61	594.671	1385.5	783	327.603	853.115	599.984	656.127	665.678	220.27	937.321	1020.98	258.339	167.229	561.464	579.712	740.3	555.506	868.346	921.625	1394.62	466.577	702.654	260.106	1129.41	1072.04	885.328	790.299	653.886	934.909	450.782	1029.05
ENSSSCG00000000291	-	G protein-coupled receptor 84	505.093	-3.88547	0.281357	-13.8098	2.22579e-43	3.22814e-40	885.831	790.625	687.639	768.874	600.673	40.6097	62.9373	47.3439	60.4884	635.496	712.881	21.9056	765.645	967.053	832.937	756.37	53.4597	1252.16	435.925	41.8013	25.6486	1507.99	605.409	280.264	647.864	392.986	757.537	345.888	41.1529	392.418	14.7787	287.051	656.668	754.541	989.572	40.3945	468.714	59.3362	1009.76
ENSSSCG00000000292	ZNF385A	zinc finger protein 385A	9.5261	1.01832	0.447962	2.27323	0.0230123	0.0628804	8.79549	18.4647	0	18.0487	2.20431	13.7448	22.0906	6.42942	14.9257	5.72519	11.6866	19.9439	10.2237	10.6993	2.76264	14.5107	14.8723	11.5009	11.4717	4.89565	14.1067	0.686386	13.3622	6.69955	4.07462	3.4322	2.73479	8.30131	17.6369	6.16363	19.2123	5.12591	6.61075	4.31166	2.26447	14.1381	0	11.0848	8.57546
ENSSSCG00000000293	ITGA5	integrin subunit alpha 5	83.498	0.928657	0.268407	3.45988	0.000540406	0.00283985	64.0814	25.1791	133.971	64.9752	93.683	129.951	105.868	126.835	116.263	19.084	62.6825	118.028	68.1583	76.5412	88.4045	47.1598	106.116	20.1265	90.1348	102.809	101.312	86.4846	86.3402	103.843	73.3431	63.4956	71.1046	22.1368	152.319	84.2363	111.333	104.227	84.838	30.1816	66.8018	78.2644	110.879	121.281	43.9492
ENSSSCG00000000295	NCKAP1L	NCK associated protein 1 like	248.177	0.359976	0.157654	2.28333	0.0224107	0.0616476	236.222	181.29	245.416	286.372	174.14	330.5	272.172	310.366	278.875	175.572	311.288	237.692	294.217	292.173	280.408	155.99	327.592	307.648	245.822	320.477	313.682	369.276	214.823	190.937	264.85	180.19	188.701	174.327	268.295	193.127	312.816	126.439	204.933	212.709	243.43	230.754	172.618	255.82	296.925
ENSSSCG00000000299	TESPA1	thymocyte expressed, positive selection associated 1	20.548	0.848593	0.302245	2.80763	0.00499077	0.0183248	22.617	20.1433	42.6811	20.4552	17.6345	31.2382	20.4233	22.7952	12.569	3.81679	21.2483	26.8098	20.4475	34.567	11.0506	25.3937	28.9406	10.0633	18.027	31.6334	24.6226	17.1597	9.25073	23.4484	36.6715	15.4449	8.20437	2.7671	20.8437	4.10909	21.1828	3.41727	28.6466	7.18611	23.7769	29.286	34.0196	24.1257	24.6544
ENSSSCG00000000359	-	biogenesis of lysosomal organelles complex 1 subunit 1	29.9186	-0.839076	0.295954	-2.83516	0.00458032	0.0170955	45.2339	58.7513	35.5676	40.9103	59.5163	18.1182	15.0049	18.1193	21.9958	66.7939	37.1845	32.6949	7.95181	24.6907	20.7198	32.6491	14.0684	18.6889	47.5256	9.4147	7.43808	8.23663	26.7243	33.4977	23.0895	5.14829	41.0219	47.0407	23.5159	32.8727	8.37461	42.7159	50.6824	40.2422	29.4381	29.7909	55.4393	11.3021	24.6544
ENSSSCG00000000361	CD63	CD63 molecule	126.652	-0.550393	0.174736	-3.14985	0.00163356	0.0072096	174.653	146.039	125.672	196.129	82.6615	104.336	74.6077	88.8429	156.327	295.801	121.115	76.8329	122.685	101.232	117.412	99.7611	89.6355	148.074	158.965	76.4474	51.8101	158.555	85.3123	137.341	103.224	137.288	128.535	174.327	122.39	199.291	111.826	126.439	132.215	133.662	176.628	96.9468	127.258	88.0263	91.1142
ENSSSCG00000000367	-	transmembrane protein 198-like	4.54207	1.32859	0.437832	3.03448	0.00240948	0.0100354	3.76949	3.35722	3.55676	6.01623	0	4.99811	9.16967	5.26043	10.9979	1.9084	3.18725	9.15456	2.27194	6.58419	1.38132	3.62768	15.2742	2.87522	1.63881	5.64882	3.33431	2.05916	7.19501	4.46637	4.07462	3.4322	0	0	5.34453	2.05454	5.91149	6.83454	1.10179	2.87444	6.7934	4.54438	7.55991	6.73781	2.14386
ENSSSCG00000000368	MMP19	matrix metallopeptidase 19	3.22489	-1.96422	0.76304	-2.57421	0.010047	0.0324373	10.052	0	3.55676	3.60974	0	0.624764	1.25041	0	0.785563	1.9084	2.12483	1.96169	3.40792	1.64605	4.14396	1.81384	0.401953	11.5009	4.91644	0.376588	0.769457	1.37277	0	8.93273	5.43282	10.2966	8.20437	5.5342	3.74117	0	0	6.83454	1.10179	7.18611	0	0	7.55991	0.434698	4.28773
ENSSSCG00000000370	DGKA	diacylglycerol kinase alpha	106.604	1.0757	0.158149	6.80177	1.0334e-11	3.46761e-10	84.1854	92.3235	143.456	50.5363	70.5378	171.185	165.054	168.918	130.404	59.1603	77.5563	171.648	98.8296	99.5859	104.98	39.9044	151.134	58.942	81.9407	238.004	173.897	91.2893	77.0894	149.623	71.9849	80.6566	87.5133	52.5749	170.49	73.9635	138.427	82.0145	70.5147	73.2983	86.0497	99.4715	93.2389	152.144	75.0353
ENSSSCG00000000376	SUOX	sulfite oxidase	9.55509	0.826167	0.366192	2.25611	0.024064	0.065181	2.513	0	13.0414	3.60974	12.1237	11.2458	9.16967	9.93638	17.2824	1.9084	6.37449	20.2708	12.4957	8.23024	5.52528	14.5107	12.8625	0	11.4717	12.0508	17.954	4.11832	8.22287	6.69955	12.2238	8.58049	2.73479	11.0684	13.8958	8.21817	18.7197	10.2518	20.934	4.31166	6.7934	8.58383	5.03994	12.1715	7.50353
ENSSSCG00000000379	ESYT1	extended synaptotagmin 1	144.114	0.504257	0.171295	2.9438	0.00324211	0.0128474	113.085	127.574	118.559	102.276	98.0916	176.183	207.568	201.066	164.968	93.5114	160.425	263.194	141.997	97.1168	131.225	117.899	263.681	100.633	121.272	166.075	225.451	126.295	197.349	98.26	119.522	99.5337	82.0437	138.355	147.509	147.927	241.878	111.061	203.831	153.783	92.8431	163.093	71.8191	142.363	91.1142
ENSSSCG00000000382	SMARCC2	SWI/SNF related, matrix associated, actin dependent regulator of chromatin subfamily c member 2	106.041	0.552795	0.173514	3.18588	0.00144313	0.00645553	72.8769	94.0021	100.775	103.479	116.828	146.195	149.632	126.25	131.975	68.7023	77.5563	134.049	117.005	107.816	62.1594	77.995	145.507	84.819	93.4124	152.518	141.837	110.508	115.12	120.592	65.1938	97.8176	43.7567	41.5065	143.768	149.982	150.743	76.8886	154.251	89.1077	91.7109	103.511	90.7189	112.152	72.8914
ENSSSCG00000000393	PAN2	poly(A) specific ribonuclease subunit PAN2	100.542	0.399913	0.14514	2.75536	0.00586279	0.0209637	113.085	68.823	104.331	108.292	100.296	129.951	122.123	118.652	99.7665	93.5114	111.554	101.027	124.957	146.498	99.4551	67.112	100.89	81.9437	111.439	196.579	137.989	124.922	98.6745	122.825	92.3579	89.2371	87.5133	35.9723	118.114	76.0181	105.914	56.385	71.6165	80.4844	67.934	105.026	80.639	99.5458	69.6756
ENSSSCG00000000394	-	canopy FGF signaling regulator 2	11.3366	0.623286	0.294714	2.11489	0.0344395	0.0869515	17.591	8.39305	4.74234	3.60974	7.71507	14.3696	20.8402	19.8728	10.2123	7.63358	1.06242	17.3283	6.81583	16.4605	8.28793	16.3245	17.284	11.5009	8.19407	17.6996	15.1326	11.6686	5.13929	15.6323	9.50744	0	13.674	5.5342	18.1714	14.3818	13.7935	13.6691	4.40717	8.62333	10.1901	12.6233	12.5998	16.0838	5.35966
ENSSSCG00000000396	STAT2	signal transducer and activator of transcription 2	136.604	-1.11053	0.153758	-7.22258	5.10122e-13	2.08734e-11	178.423	166.182	237.117	103.479	190.673	68.724	82.1102	78.9065	68.344	122.137	219.92	70.294	164.716	176.127	185.097	190.453	59.891	150.949	126.189	64.3966	58.2222	202.484	97.6466	215.502	162.985	159.597	131.27	149.424	49.1697	143.818	69.9526	232.374	148.742	106.354	183.422	89.8778	186.478	68.8996	167.221
ENSSSCG00000000402	RBMS2	RNA binding motif single stranded interacting protein 2	4.40466	-1.37323	0.549696	-2.49816	0.0124841	0.0384691	1.2565	0	2.37117	3.60974	5.51077	3.12382	2.50082	4.67594	0	3.81679	2.12483	2.61559	3.40792	4.11512	4.14396	7.25535	6.02929	4.31283	9.83289	3.38929	4.36025	4.11832	8.22287	2.23318	9.50744	0	0	5.5342	2.13781	18.4909	1.9705	22.2123	4.40717	2.87444	3.3967	1.00986	5.03994	2.17349	0
ENSSSCG00000000403	BAZ2A	bromodomain adjacent to zinc finger domain 2A	236.475	-0.34702	0.151248	-2.29438	0.0217688	0.0601755	265.121	256.827	216.962	304.421	212.716	233.662	219.655	215.678	165.754	97.3282	353.784	215.459	203.339	232.916	263.832	284.773	206.604	250.144	180.27	239.51	214.165	319.856	301.163	180.888	289.298	199.067	303.562	201.998	173.697	281.472	230.548	201.619	221.46	291.756	226.447	210.556	287.277	193.44	275.487
ENSSSCG00000000406	PTGES3	prostaglandin E synthase 3	115.878	-1.02786	0.221958	-4.63085	3.64171e-06	3.54477e-05	174.653	147.718	68.7639	123.934	122.339	129.326	65.4381	55.5268	71.4863	211.832	100.929	61.4663	99.9656	186.003	77.354	143.293	64.3125	258.77	167.159	115.989	62.0695	95.4077	290.884	88.2107	73.3431	126.991	134.005	146.656	72.1511	160.254	70.9379	126.439	124.502	133.662	58.8761	80.2841	80.639	75.8547	71.8195
ENSSSCG00000000411	NAB2	NGFI-A binding protein 2	8.09883	0.98173	0.391302	2.50888	0.0121115	0.0375871	7.53899	8.39305	4.74234	6.01623	6.61292	7.49717	21.6738	12.8588	12.569	0	8.49932	7.51982	4.54389	6.58419	6.9066	7.25535	7.23515	2.87522	9.83289	5.27223	12.3113	6.17747	9.25073	5.58296	19.0149	10.2966	0	8.30131	13.8958	6.16363	8.86723	0	6.61075	11.4978	2.26447	5.55424	10.0799	19.1267	6.43159
ENSSSCG00000000433	B4GALNT1	beta-1,4-N-acetyl-galactosaminyltransferase 1	4.12667	3.26258	0.760245	4.29149	1.77481e-05	0.000143092	2.513	0	3.55676	0	4.40861	14.9943	8.33606	7.59841	20.4246	0	0	6.53897	0	0	0	0	8.44101	0	0	4.14247	14.1067	0	0	1.11659	6.79103	0	5.46958	0	13.3613	0	19.2123	0	5.50896	2.87444	1.13223	4.54438	0	5.86842	0
ENSSSCG00000000437	ARHGAP9	Rho GTPase activating protein 9	75.2318	1.38561	0.262569	5.27713	1.31223e-07	1.86993e-06	67.8509	35.2508	29.6396	58.959	45.1883	151.818	116.705	137.356	192.463	40.0763	33.9973	105.277	99.9656	58.4347	67.6847	34.4629	139.478	84.819	60.6361	137.455	115.675	78.248	61.6715	32.3812	35.3133	34.322	13.674	47.0407	115.442	71.909	148.28	35.8813	45.1735	17.2467	32.8348	94.9271	27.7197	144.102	84.6826
ENSSSCG00000000443	GLI1	GLI family zinc finger 1	2.0292	2.02115	0.803367	2.51584	0.0118748	0.0370109	2.513	0	0	0	0	2.49906	3.33442	5.26043	11.7834	0	0	2.94254	3.40792	1.64605	0	0	1.60781	0	3.27763	3.38929	4.36025	1.37277	1.02786	1.11659	1.35821	5.14829	0	0	1.06891	4.10909	3.44837	1.70864	0	0	6.7934	1.00986	1.25998	3.69493	0
ENSSSCG00000000457	USP15	ubiquitin specific peptidase 15	150.001	-1.52464	0.144479	-10.5527	4.9357e-26	9.76146e-24	222.4	199.754	272.685	205.755	200.592	62.4764	62.9373	63.7097	65.9873	139.313	232.669	55.2543	114.733	193.411	241.731	192.267	46.2246	171.076	137.66	57.2414	49.5017	216.898	132.594	160.789	188.791	181.906	175.027	193.697	67.8755	154.091	55.1739	170.864	139.928	202.648	228.711	67.6608	162.538	69.769	293.709
ENSSSCG00000000458	MON2	MON2 homolog, regulator of endosome-to-Golgi trafficking	37.2507	-0.405198	0.164531	-2.46274	0.0137881	0.0417094	31.4124	38.608	26.0829	33.6909	25.3495	35.6115	35.8451	29.8091	25.9236	38.1679	35.0597	31.3871	36.3511	26.3368	33.1517	45.3459	31.7543	47.4411	19.6658	27.8675	26.1615	48.047	58.588	56.9462	32.5969	29.1737	51.961	47.0407	28.326	41.0909	33.4984	56.385	40.7663	56.0516	36.2315	48.4734	22.6797	36.732	47.165
ENSSSCG00000000466	XPOT	exportin for tRNA	15.0245	0.812697	0.376336	2.1595	0.0308115	0.0798775	12.565	8.39305	18.9694	4.81298	4.40861	13.12	29.1762	26.3022	13.3546	1.9084	13.8114	17.0013	7.95181	16.4605	13.8132	12.6969	16.0781	5.75044	14.7493	18.8294	25.6486	9.60941	13.3622	31.2646	19.0149	15.4449	21.8783	0	11.2235	20.5454	15.764	3.41727	27.5448	7.18611	14.719	31.8107	6.29992	8.9113	32.158
ENSSSCG00000000475	IRAK3	interleukin 1 receptor associated kinase 3	38.0253	-0.539485	0.226829	-2.37838	0.017389	0.050375	52.7729	50.3583	13.0414	38.5039	24.2474	43.1087	32.9274	42.0835	21.2102	32.4427	47.8087	50.677	39.759	46.0893	46.9649	32.6491	24.9211	61.8172	36.0539	22.5953	35.1385	52.8517	48.3094	35.7309	38.0297	49.7668	24.6131	41.5065	21.9126	47.2545	28.5722	29.0468	53.9878	53.1772	40.7604	39.8896	27.7197	17.1706	37.5176
ENSSSCG00000000487	SLC35E3	solute carrier family 35 member E3	2.70017	2.4741	0.724518	3.41482	0.000638236	0.00328376	0	6.71444	0	1.20325	0	5.62288	3.33442	11.6899	3.14225	3.81679	1.06242	7.51982	0	1.64605	1.38132	0	3.61758	0	6.55526	4.51906	3.84728	0.686386	3.08358	8.93273	2.71641	1.7161	0	0	2.13781	0	3.44837	0	0	0	3.3967	7.06904	1.25998	3.04288	2.14386
ENSSSCG00000000500	-	RAB3A interacting protein	21.5777	0.971667	0.27686	3.5096	0.000448785	0.00241666	12.565	5.03583	29.6396	19.2519	20.9409	51.8554	29.1762	37.992	31.4225	13.3588	5.31208	35.6374	26.1274	21.3986	20.7198	25.3937	27.7347	23.0018	14.7493	35.3993	28.2134	15.1005	35.9751	24.565	12.2238	8.58049	10.9392	5.5342	20.3092	10.2727	27.0943	11.9604	6.61075	14.3722	12.4546	30.2959	21.4197	42.8177	16.079
ENSSSCG00000000519	GLIPR1	GLI pathogenesis related 1	25.9963	0.542974	0.214685	2.52916	0.0114335	0.0360399	23.8735	15.1075	28.454	36.0974	22.0431	41.2344	42.9307	38.5765	15.7113	24.8091	23.3731	33.0218	30.6712	32.0979	17.9572	25.3937	46.2246	35.9402	11.4717	36.9056	39.4988	19.9052	21.585	16.7489	12.2238	10.2966	21.8783	5.5342	38.4806	22.6	36.4542	27.3382	20.934	22.9955	19.248	24.2367	15.1198	36.5146	20.3667
ENSSSCG00000000523	BBS10	Bardet-Biedl syndrome 10	2.88036	1.39285	0.635156	2.19292	0.0283132	0.074661	5.02599	3.35722	1.18559	0	0	5.62288	5.00164	7.59841	2.35669	0	3.18725	2.94254	4.54389	1.64605	1.38132	1.81384	3.21562	0	9.83289	6.402	4.36025	1.37277	3.08358	0	2.71641	0	0	0	3.20672	0	6.40411	0	5.50896	0	1.13223	4.54438	8.81989	4.99902	1.07193
ENSSSCG00000000530	-	FYVE, RhoGEF and PH domain containing 4	41.6729	-0.691974	0.188908	-3.66303	0.00024925	0.00144506	60.3119	45.3224	50.9802	70.9915	23.1452	32.4877	28.7594	42.668	31.4225	38.1679	64.8073	27.4637	55.6626	50.2044	48.3462	39.9044	31.3523	51.7539	37.6927	45.5672	28.9829	59.0292	26.7243	36.8475	32.5969	29.1737	68.3698	49.8078	32.0672	43.1454	30.5427	46.1331	44.0717	56.0516	30.5703	30.8008	21.4197	31.5156	50.3808
ENSSSCG00000000534	IPO8	importin 8	26.6285	0.655513	0.221194	2.96353	0.00304136	0.0121776	30.1559	10.0717	22.5261	10.8292	34.1667	29.3639	39.5963	39.161	22.7813	19.084	14.8738	36.9452	27.2633	31.2749	23.4825	18.1384	35.3719	31.6274	11.4717	51.9692	46.1674	18.5324	34.9472	23.4484	36.6715	27.4576	10.9392	8.30131	33.1361	10.2727	45.814	23.9209	14.3233	28.7444	18.1157	35.8501	26.4597	27.386	27.8702
ENSSSCG00000000541	FAR2	fatty acyl-CoA reductase 2	25.2011	-3.72065	0.449516	-8.277	1.26312e-16	8.36932e-15	32.6689	20.1433	17.7838	44.5201	20.9409	2.49906	2.50082	4.09145	0.785563	13.3588	77.5563	4.25033	19.3115	34.567	38.677	34.4629	4.82343	66.13	26.221	7.15517	1.53891	65.8931	23.6408	6.69955	17.6567	15.4449	35.5523	13.8355	2.13781	30.8181	6.89674	18.795	41.8681	57.4888	69.0662	3.53452	22.6797	7.17251	69.6756
ENSSSCG00000000549	PPFIBP1	PPFIA binding protein 1	6.72914	-1.45239	0.490148	-2.96316	0.00304499	0.0121884	1.2565	8.39305	10.6703	2.40649	18.7366	4.99811	0.833606	0	3.14225	0	9.56174	2.94254	7.95181	13.9914	2.76264	7.25535	2.81367	11.5009	6.55526	2.25953	1.7954	18.5324	3.08358	5.58296	9.50744	8.58049	13.674	5.5342	4.27562	22.6	0.985248	3.41727	7.71254	14.3722	4.52893	3.02959	8.81989	0.869395	7.50353
ENSSSCG00000000553	TM7SF3	transmembrane 7 superfamily member 3	103.651	-0.955812	0.225724	-4.23442	2.29143e-05	0.000179748	128.163	141.003	202.735	138.373	56.2098	68.0993	50.0164	55.5268	65.2018	97.3282	145.551	52.9657	77.2461	100.409	158.852	112.458	45.0187	150.949	157.326	51.5926	49.5017	96.7804	35.9751	116.126	115.447	190.487	153.148	152.191	67.8755	123.273	72.4157	85.4318	67.2093	123.601	169.835	49.9882	178.918	33.037	106.121
ENSSSCG00000000554	FGFR1OP2	FGFR1 oncogene partner 2	182.427	-0.57739	0.207421	-2.78366	0.00537497	0.0194671	172.14	161.146	184.951	198.535	130.054	136.199	118.372	71.3081	136.688	232.824	171.049	84.6797	185.163	162.959	241.731	197.708	100.086	237.206	406.426	89.628	53.862	140.023	191.182	236.717	158.91	235.105	276.214	262.875	161.939	166.418	55.1739	271.673	234.682	237.142	176.628	217.625	175.138	192.571	251.904
ENSSSCG00000000555	ITPR2	inositol 1,4,5-trisphosphate receptor type 2	57.4088	0.616529	0.197085	3.12823	0.0017586	0.00764912	55.2859	77.216	66.3928	50.5363	23.1452	69.3488	92.5303	60.2028	38.4926	11.4504	64.8073	80.4294	42.031	63.3728	71.8287	59.8566	72.3515	60.3796	68.8302	74.5645	72.8419	58.3428	56.5322	81.5112	57.0446	82.3727	35.5523	41.5065	70.0133	36.9818	62.5633	23.9209	29.7484	45.9911	45.2893	64.6312	66.7792	52.8158	51.4527
ENSSSCG00000000576	-	lactate dehydrogenase B	148.311	0.44924	0.157761	2.8476	0.00440505	0.0166086	120.624	124.217	129.229	125.138	152.097	171.81	174.64	150.799	229.384	217.557	94.555	189.303	145.404	111.108	116.031	136.038	191.732	79.0685	147.493	184.905	155.943	82.3663	119.232	141.807	169.776	109.83	92.9829	174.327	198.816	166.418	190.153	203.328	147.64	150.908	115.488	156.024	147.418	186.92	83.6107
ENSSSCG00000000588	PLEKHA5	pleckstrin homology domain containing A5	0.840357	2.33782	1.00597	2.32394	0.0201285	0.0565391	0	0	0	2.40649	0	1.24953	4.16803	1.75348	2.35669	0	0	0.980846	0	0	0	1.81384	3.61758	0	0	0.376588	1.53891	0	0	0	0	5.14829	0	0	1.60336	0	0.985248	0	0	0	0	1.51479	0	3.26023	0
ENSSSCG00000000599	DERA	deoxyribose-phosphate aldolase	14.2871	0.808659	0.310513	2.60427	0.00920707	0.0302568	5.02599	10.0717	8.2991	9.62596	22.0431	19.9924	21.6738	16.9503	16.4968	7.63358	2.12483	25.175	19.3115	11.5223	13.8132	12.6969	18.4898	1.43761	29.4987	12.0508	22.8272	10.2958	20.5572	18.9821	20.3731	10.2966	8.20437	8.30131	16.568	14.3818	19.2123	23.9209	6.61075	4.31166	13.5868	13.1282	13.8598	13.9103	13.9351
ENSSSCG00000000607	ART4	ADP-ribosyltransferase 4 (Dombrock blood group)	10.4798	-1.89702	0.477564	-3.97228	7.11866e-05	0.000486746	8.79549	11.7503	5.92793	7.21947	11.0215	1.87429	4.58483	0.584493	0	26.7175	7.43691	0.653897	6.81583	9.05326	6.9066	7.25535	1.60781	11.5009	9.83289	2.25953	1.02594	9.60941	9.25073	7.81614	1.35821	17.161	5.46958	33.2052	4.81008	20.5454	3.44837	39.2986	15.4251	25.87	10.1901	15.6529	21.4197	19.9961	5.35966
ENSSSCG00000000612	ATF7IP	activating transcription factor 7 interacting protein	81.9382	0.316416	0.132615	2.38598	0.0170339	0.0495878	92.9808	75.5374	64.0216	58.959	49.5969	103.086	100.033	113.976	80.913	64.8855	79.6812	103.316	79.5181	83.1254	80.1166	67.112	105.312	46.0035	73.7466	121.638	118.24	75.5025	97.6466	63.6457	71.9849	75.5083	79.3089	110.684	67.3411	96.5635	90.1502	46.1331	85.9398	73.2983	54.3472	112.095	59.2193	103.675	70.7475
ENSSSCG00000000619	FAM234B	family with sequence similarity 234 member B	8.29108	-1.35324	0.623453	-2.17056	0.0299646	0.0780696	2.513	10.0717	4.74234	8.42272	3.30646	0	2.91762	8.76739	0.785563	9.54198	19.1235	3.59643	13.6317	5.76117	0	9.06919	2.00976	8.62566	4.91644	1.50635	4.10377	0	5.13929	8.93273	2.71641	1.7161	8.20437	49.8078	14.9647	36.9818	3.44837	25.6295	9.91613	1.43722	9.05787	11.1085	5.03994	3.69493	2.14386
ENSSSCG00000000623	BCL2L14	BCL2 like 14	5.21189	-2.43731	0.714521	-3.41111	0.000646982	0.00332351	8.79549	16.7861	11.8559	8.42272	8.81723	0	2.50082	0	0	7.63358	1.06242	0.653897	0	13.9914	17.9572	7.25535	0	7.18805	0	0	1.02594	3.43193	10.2786	5.58296	16.2985	1.7161	8.20437	0	1.06891	8.21817	2.46312	5.12591	4.40717	1.43722	10.1901	3.02959	3.77995	0.869395	3.2158
ENSSSCG00000000633	YBX3	Y-box binding protein 3	1913.27	-1.16054	0.229359	-5.05992	4.19426e-07	5.33603e-06	2152.38	5306.08	2139.98	2586.98	3065.09	1020.86	633.124	966.751	1439.94	4005.72	2865.33	1112.28	1295.01	1477.33	2328.91	1953.5	711.055	2436.75	3613.59	787.446	490.144	1235.49	761.644	2089.14	2523.55	3197.09	2904.35	2944.2	986.6	2038.11	1041.9	1821.4	1756.26	1849.7	1716.47	1128.52	2294.43	470.995	1469.62
ENSSSCG00000000645	GABARAPL1	GABA type A receptor associated protein like 1	1989.99	-0.80747	0.254789	-3.16917	0.00152875	0.00680354	2210.18	1744.07	2897.57	2330.69	2851.27	1222.66	967.4	767.439	1388.88	845.419	2148.2	404.108	1616.49	1363.75	1838.54	1518.18	659.203	2783.21	5334.34	948.249	338.817	1562.21	1572.62	1931.7	2482.8	3265.73	3147.74	4305.61	1905.86	2453.12	890.172	1708.64	2834.91	3054.1	2148.98	1860.67	2914.35	603.795	2788.1
ENSSSCG00000000647	OLR1	oxidized low density lipoprotein receptor 1	30.6153	-3.07457	0.34161	-9.00023	2.25249e-19	2.19416e-17	70.3639	53.7155	27.2685	64.9752	42.984	5.62288	10.0033	5.84493	6.28451	20.9924	39.3094	3.59643	42.031	73.2491	22.1011	41.7183	4.01953	80.5061	11.4717	3.76588	1.7954	52.8517	46.2537	33.4977	28.5223	20.5932	49.2262	38.7394	2.67226	14.3818	0.492624	35.8813	38.5627	51.74	71.3307	4.54438	34.0196	3.69493	35.3738
ENSSSCG00000000648	CLEC7A	C-type lectin domain containing 7A	8.31191	-1.19557	0.519152	-2.30293	0.0212825	0.0591066	13.8215	10.0717	11.8559	22.8617	12.1237	3.74858	4.58483	2.92246	2.35669	0	1.06242	2.28864	5.67986	15.6375	5.52528	5.44151	1.60781	12.9385	4.91644	2.63612	1.02594	6.86386	7.19501	1.11659	14.9403	15.4449	10.9392	11.0684	11.758	8.21817	7.88199	5.12591	8.81433	2.87444	33.967	0.504931	12.5998	6.73781	15.0071
ENSSSCG00000000649	CLEC1A	C-type lectin domain family 1 member A	7.3313	-1.5826	0.608523	-2.60071	0.00930298	0.0305105	25.13	0	5.92793	8.42272	1.10215	5.62288	3.75123	4.67594	2.35669	13.3588	8.49932	2.28864	14.7676	11.5223	5.52528	7.25535	1.20586	1.43761	21.3046	2.63612	0.512971	4.8047	1.02786	3.34977	6.79103	8.58049	41.0219	11.0684	4.27562	0	0.492624	5.12591	1.10179	21.5583	6.7934	3.53452	11.3399	2.39084	5.35966
ENSSSCG00000000650	CLEC1B	C-type lectin domain family 1 member B	113.225	-1.56349	0.316717	-4.93655	7.9518e-07	9.42732e-06	126.906	204.79	170.724	87.8369	50.699	41.8592	27.509	21.6262	80.1275	188.931	73.3067	55.5813	71.5662	145.675	165.759	88.8781	27.3328	192.64	335.957	24.1016	31.8042	181.892	31.8636	158.556	129.029	180.19	120.331	130.054	47.0319	160.254	69.9526	175.989	107.976	143.722	146.058	49.4833	229.317	19.344	121.128
ENSSSCG00000000651	CLEC12B	C-type lectin domain family 12 member B	5.4983	-1.40406	0.576607	-2.43503	0.0148904	0.0444622	11.3085	11.7503	9.48468	9.62596	0	3.12382	0.833606	1.75348	4.71338	3.81679	1.06242	3.26949	3.40792	8.23024	11.0506	7.25535	2.81367	10.0633	19.6658	2.25953	1.7954	6.17747	1.02786	2.23318	14.9403	8.58049	0	11.0684	0.534453	2.05454	2.46312	1.70864	6.61075	1.43722	7.92563	1.51479	10.0799	0.217349	8.57546
ENSSSCG00000000653	CD69	CD69 molecule	65.0504	-1.70869	0.253906	-6.72961	1.70121e-11	5.57937e-10	69.1074	62.1085	141.085	50.5363	73.8443	27.4896	25.0082	32.7316	14.9257	59.1603	82.8684	22.2325	39.759	65.0189	139.513	114.272	15.2742	73.3181	57.3585	28.9973	25.6486	143.455	64.7551	88.2107	112.731	84.0888	112.126	33.2052	22.447	43.1454	25.6165	59.8022	57.2932	71.8611	100.769	28.2762	93.2389	23.4737	152.214
ENSSSCG00000000656	CLEC2B	C-type lectin domain family 2, member B	28.3885	-2.13191	0.381432	-5.58923	2.28084e-08	3.90195e-07	56.5424	48.6797	47.4234	25.2682	37.4732	6.24764	3.75123	9.35188	9.42676	7.63358	63.7449	6.53897	23.8554	60.9038	53.8715	38.0906	6.43125	56.0668	31.1375	5.27223	4.10377	67.2658	14.39	48.0134	59.761	12.0127	24.6131	16.6026	11.758	18.4909	1.9705	27.3382	11.0179	20.1211	23.7769	3.53452	57.9593	7.38986	79.323
ENSSSCG00000000657	-	C-type lectin domain family 2 member D	277.502	0.934035	0.24244	3.85264	0.000116849	0.000750237	241.248	198.076	295.211	244.259	231.452	396.1	332.609	384.596	483.121	150.763	362.284	293.6	475.972	284.766	366.05	139.666	317.945	297.585	122.911	307.673	289.829	380.944	140.817	180.888	282.507	156.165	229.722	121.752	363.962	121.218	422.671	133.274	174.083	119.289	378.166	320.126	183.958	480.341	416.982
ENSSSCG00000000660	A2M	alpha-2-macroglobulin	3.855	3.11541	0.748563	4.16185	3.1568e-05	0.000238046	0	0	0	2.40649	0	13.7448	7.50245	10.5209	19.6391	0	0	4.90423	5.67986	2.46907	0	9.06919	6.43125	0	0	4.51906	5.64268	0	1.02786	0	2.71641	0	0	0	5.87898	4.10909	14.2861	0	0	2.87444	2.26447	13.6331	0	6.73781	4.28773
ENSSSCG00000000661	PHC1	polyhomeotic homolog 1	22.5639	0.632563	0.272961	2.31741	0.0204814	0.0572657	13.8215	28.5364	27.2685	24.0649	12.1237	29.9887	36.2619	30.9781	25.9236	22.9008	32.9349	29.4254	21.5835	20.5756	16.5759	23.5799	28.5387	11.5009	36.0539	26.7378	27.9569	4.11832	29.8079	15.6323	8.14923	32.6059	19.1435	13.8355	32.6016	34.9272	26.6017	15.3777	22.0358	12.935	22.6447	22.217	6.29992	20.8655	12.8632
ENSSSCG00000000663	KLRG1	killer cell lectin like receptor G1	10.4776	1.93733	0.352432	5.49704	3.86223e-08	6.23932e-07	2.513	1.67861	3.55676	0	4.40861	23.1163	21.6738	18.7038	13.3546	5.72519	8.49932	18.3091	9.08778	5.76117	6.9066	16.3245	24.1172	0	0	33.1398	22.0578	9.60941	9.25073	10.0493	5.43282	5.14829	2.73479	0	15.4991	4.10909	20.6902	0	11.0179	4.31166	14.719	21.2071	7.55991	19.7787	8.57546
ENSSSCG00000000683	CDCA3	cell division cycle associated 3	6.4083	-1.74537	0.580445	-3.00696	0.00263874	0.0108279	1.2565	5.03583	1.18559	4.81298	6.61292	1.87429	3.33442	0.584493	3.14225	20.9924	14.8738	2.61559	3.40792	2.46907	6.9066	12.6969	0.401953	0	11.4717	1.12976	0	4.8047	14.39	6.69955	9.50744	8.58049	5.46958	5.5342	1.60336	8.21817	1.9705	6.83454	20.934	15.8094	11.3223	6.56411	7.55991	7.17251	2.14386
ENSSSCG00000000684	USP5	ubiquitin specific peptidase 5	51.3407	0.582651	0.199337	2.92294	0.00346744	0.0135714	42.7209	45.3224	37.9387	26.4714	71.64	63.1012	84.611	57.8648	56.5606	45.8015	27.6228	73.2365	57.9346	36.213	45.5836	50.7875	79.5867	33.065	32.7763	65.1497	68.4816	34.3193	46.2537	55.8296	70.6267	63.4956	27.3479	44.2736	59.8587	32.8727	83.2535	63.2195	49.5806	73.2983	27.1736	54.5326	23.9397	55.6413	34.3018
ENSSSCG00000000685	TPI1	triosephosphate isomerase 1	170.947	-0.472738	0.124467	-3.79811	0.000145803	0.000907999	175.91	193.04	151.755	241.852	251.291	130.576	117.538	106.962	193.249	206.107	138.114	102.335	153.356	168.72	128.463	179.57	129.831	188.327	229.434	105.821	91.8218	142.082	204.544	159.673	145.328	168.178	139.474	332.052	136.285	182.854	130.053	228.957	241.292	212.709	177.761	171.172	200.338	118.238	191.876
ENSSSCG00000000687	CD4	CD4 molecule	42.3187	1.4078	0.202341	6.95753	3.4628e-12	1.24236e-10	33.9254	28.5364	35.5676	33.6909	28.656	68.724	65.4381	88.8429	60.4884	15.2672	23.3731	102.662	37.4871	40.3282	44.2023	16.3245	56.6754	7.18805	49.1644	100.549	79.5105	26.0827	39.0586	24.565	50.2536	29.1737	10.9392	27.671	66.8066	26.7091	49.755	13.6691	28.6466	15.8094	44.1571	56.5523	28.9797	64.9873	30.0141
ENSSSCG00000000688	LAG3	lymphocyte activating 3	3.26499	-2.00969	0.792891	-2.53463	0.0112566	0.0356285	0	6.71444	0	8.42272	9.91938	3.74858	1.25041	0.584493	0	13.3588	1.06242	0	0	1.64605	6.9066	0	1.20586	1.43761	0	2.25953	0.769457	6.17747	3.08358	1.11659	5.43282	5.14829	2.73479	0	0	4.10909	0	13.6691	2.20358	11.4978	2.26447	1.51479	6.29992	0.652047	2.14386
ENSSSCG00000000693	NCAPD2	non-SMC condensin I complex subunit D2	47.8875	-1.11113	0.222472	-4.9945	5.89878e-07	7.23654e-06	37.6949	48.6797	36.7531	45.7233	35.2689	26.2401	26.6754	32.7316	29.8514	57.2519	37.1845	22.5595	46.5749	48.5584	13.8132	81.6227	21.3035	47.4411	55.7197	22.9719	30.0088	45.9879	105.869	49.13	21.7313	44.6185	49.2262	91.3144	32.6016	94.509	19.705	82.0145	93.6523	81.9216	46.4216	56.0474	61.7393	54.3372	32.158
ENSSSCG00000000695	IFFO1	intermediate filament family orphan 1	38.2564	0.75104	0.178686	4.20312	2.63267e-05	0.000203098	16.3345	15.1075	39.1243	40.9103	30.8603	76.846	46.6819	48.5129	47.9194	20.9924	42.4966	64.4089	36.3511	34.567	27.6264	34.4629	44.6168	24.4394	26.221	63.2668	57.9657	27.4554	35.9751	25.6816	25.8059	44.6185	16.4087	38.7394	56.652	36.9818	54.1886	42.7159	28.6466	30.1816	35.0992	34.8403	36.5396	52.8158	28.9422
ENSSSCG00000000696	-	NOP2 nucleolar protein	32.1233	0.524191	0.220508	2.3772	0.0174446	0.0504776	25.13	43.6438	29.6396	14.4389	36.3711	29.9887	45.8483	46.7594	45.5627	38.1679	14.8738	46.4267	21.5835	24.6907	31.7704	32.6491	38.1855	11.5009	42.6092	42.5545	44.372	32.2601	43.1701	65.8789	28.5223	36.0381	21.8783	24.9039	30.9983	16.4363	41.873	27.3382	22.0358	22.9955	21.5124	33.3255	34.0196	29.9941	12.8632
ENSSSCG00000000697	-	chromodomain helicase DNA binding protein 4	171.149	0.457377	0.124895	3.66209	0.000250166	0.00144936	148.267	129.253	105.517	175.674	111.317	179.932	259.251	218.016	207.389	116.412	192.297	246.192	139.725	162.136	172.665	186.825	242.378	176.826	186.825	250.808	231.35	159.242	163.43	149.623	129.029	128.707	95.7177	124.52	195.61	172.582	241.386	134.982	157.556	183.964	186.819	200.458	105.839	199.092	107.193
ENSSSCG00000000699	LPAR5	lysophosphatidic acid receptor 5	4.33171	1.34877	0.526196	2.56325	0.0103697	0.0332442	1.2565	11.7503	4.74234	0	0	6.8724	3.75123	11.6899	10.9979	3.81679	0	5.88508	3.40792	2.46907	2.76264	7.25535	4.82343	0	3.27763	9.79129	6.41214	3.43193	0	1.11659	1.35821	1.7161	5.46958	0	8.01679	8.21817	5.41886	6.83454	1.10179	0	5.66117	6.56411	5.03994	6.95516	1.07193
ENSSSCG00000000702	ZNF384	zinc finger protein 384	56.0291	0.433501	0.183979	2.35625	0.0184604	0.0526812	59.0554	36.9294	50.9802	38.5039	38.5754	54.3545	60.0196	59.0338	66.7729	28.6259	38.247	71.9287	74.9742	63.3728	60.7781	23.5799	76.773	47.4411	37.6927	81.7196	78.9976	70.0114	74.0058	62.5291	80.1341	39.4703	30.0827	47.0407	77.4957	28.7636	80.2977	49.5504	52.886	71.8611	38.4959	63.6213	35.2796	61.2924	73.9633
ENSSSCG00000000703	-	vesicle associated membrane protein 1	26.9253	1.82187	0.302701	6.01873	1.75794e-09	3.84361e-08	12.565	26.8577	34.382	10.8292	29.7581	44.983	69.6061	37.4075	37.707	5.72519	16.9986	54.6004	34.0792	18.1065	16.5759	7.25535	67.93	15.8137	11.4717	24.4782	62.0695	24.0235	29.8079	10.0493	8.14923	5.14829	30.0827	2.7671	45.9629	14.3818	45.814	18.795	16.5269	5.74888	14.719	57.5622	16.3798	47.8167	17.1509
ENSSSCG00000000704	TAPBPL	TAP binding protein like	1.4018	2.53854	0.771118	3.29202	0.000994699	0.0047231	0	0	0	0	0	3.74858	4.16803	1.75348	2.35669	0	0	3.26949	0	2.46907	0	0	2.41172	1.43761	1.63881	1.12976	4.10377	0	1.02786	0	1.35821	0	0	0	3.74117	0	4.92624	0	3.30538	0	1.13223	3.02959	3.77995	1.73879	2.14386
ENSSSCG00000000705	CD27	CD27 molecule	10.6671	1.21517	0.36914	3.2919	0.000995146	0.00472351	11.3085	21.8219	18.9694	3.60974	2.20431	17.4934	22.0906	11.6899	14.9257	7.63358	11.6866	11.1163	19.3115	7.40721	16.5759	0	10.4508	4.31283	8.19407	21.0889	22.0578	12.3549	9.25073	12.2825	8.14923	10.2966	10.9392	5.5342	7.48234	0	13.3008	5.12591	4.40717	2.87444	1.13223	13.6331	13.8598	16.0838	5.35966
ENSSSCG00000000706	LTBR	lymphotoxin beta receptor	15.031	-0.934184	0.439123	-2.12738	0.0333881	0.084958	27.643	26.8577	2.37117	21.6584	26.4517	13.12	9.58647	5.84493	4.71338	24.8091	18.0611	4.57728	17.0396	23.8677	19.3385	3.62768	12.0586	31.6274	11.4717	6.402	6.41214	48.047	11.3064	4.46637	4.07462	1.7161	24.6131	22.1368	15.4991	18.4909	16.2566	5.12591	8.81433	25.87	16.9835	11.1085	8.81989	18.9093	6.43159
ENSSSCG00000000712	VWF	von Willebrand factor	191.03	-1.39812	0.372569	-3.75265	0.000174976	0.00106132	143.241	347.472	345.005	656.972	249.087	64.3507	45.0147	75.3996	135.902	458.015	314.475	99.0654	123.821	65.0189	179.572	96.1334	30.9504	403.968	422.814	39.9183	30.7783	203.17	40.0865	467.852	180.641	161.313	175.027	243.505	130.406	123.273	88.1797	196.493	136.622	222.769	182.29	115.629	302.396	112.804	40.7334
ENSSSCG00000000722	RAD51AP1	RAD51 associated protein 1	1.46599	-2.29909	1.07745	-2.13382	0.0328574	0.083849	1.2565	0	0	1.20325	0	0	1.25041	0	1.57113	17.1756	0	0.326949	0	0	0	0	0	4.31283	1.63881	0	0.512971	0	1.02786	1.11659	1.35821	0	0	8.30131	0	0	0.492624	5.12591	0	8.62333	0	1.00986	0	0.869395	0
ENSSSCG00000000723	C12orf4	chromosome 5 C12orf4 homolog	14.8465	0.859646	0.318642	2.69785	0.00697896	0.0241635	8.79549	15.1075	23.7117	0	7.71507	26.2401	22.5074	24.5487	5.49894	3.81679	9.56174	17.6552	20.4475	18.1065	8.28793	12.6969	23.7152	7.18805	18.027	34.6461	24.3661	13.7277	21.585	16.7489	20.3731	8.58049	5.46958	13.8355	14.9647	12.3273	10.8377	11.9604	12.1197	10.0605	4.52893	19.1874	8.81989	21.9522	19.2948
ENSSSCG00000000728	PARP11	poly(ADP-ribose) polymerase family member 11	3.18309	-1.81706	0.79489	-2.28592	0.0222587	0.061304	1.2565	0	4.74234	1.20325	9.91938	1.24953	0.416803	2.33797	0	0	1.06242	0.326949	4.54389	2.46907	12.4319	9.06919	0	1.43761	0	0.753176	3.07783	8.92302	3.08358	10.0493	8.14923	5.14829	0	0	0.534453	2.05454	0	1.70864	2.20358	1.43722	10.1901	2.01973	5.03994	0.869395	6.43159
ENSSSCG00000000735	TSPAN9	tetraspanin 9	62.58	-1.02706	0.303467	-3.38442	0.000713279	0.00359271	74.1334	97.3593	113.816	119.121	49.5969	38.1106	22.0906	34.4851	72.2718	104.962	81.806	41.5225	44.3029	36.213	55.2528	67.112	18.4898	132.26	116.356	23.7251	20.2624	80.3072	23.6408	141.807	84.2087	94.3854	27.3479	88.5473	30.4638	86.2908	36.4542	46.1331	55.0896	37.3678	92.8431	37.3649	78.1191	9.12865	27.8702
ENSSSCG00000000736	TEAD4	TEA domain transcription factor 4	1.06377	-4.31464	1.68218	-2.56491	0.0103202	0.0331308	1.2565	0	0	2.40649	4.40861	0	0	0	0	5.72519	0	0	0	0.823024	0	10.883	0	1.43761	0	0	0	0	3.08358	0	0	0	0	0	0	0	0	0	8.81433	0	0	0.504931	0	0	2.14386
ENSSSCG00000000745	DDX11	DEAD/H-box helicase 11	13.9848	0.901252	0.344311	2.61755	0.00885637	0.0294078	6.28249	6.71444	27.2685	25.2682	9.91938	16.8686	17.5057	18.7038	10.2123	13.3588	7.43691	26.8098	14.7676	12.3454	19.3385	9.06919	10.4508	2.87522	6.55526	22.5953	19.4929	12.3549	14.39	7.81614	16.2985	10.2966	2.73479	2.7671	26.1882	16.4363	18.2271	5.12591	3.30538	4.31166	10.1901	25.7515	26.4597	23.9084	15.0071
ENSSSCG00000000749	SLC6A12	solute carrier family 6 member 12	4.62627	-2.88473	0.7858	-3.67108	0.000241529	0.00140556	0	3.35722	11.8559	0	3.30646	1.87429	1.25041	0.584493	0	11.4504	4.24966	0	2.27194	5.76117	8.28793	0	0	12.9385	3.27763	0	1.7954	8.92302	2.05572	2.23318	10.8656	20.5932	0	8.30131	0.534453	10.2727	0.985248	10.2518	2.20358	2.87444	13.5868	0.504931	8.81989	0.869395	4.28773
ENSSSCG00000000753	WNK1	WNK lysine deficient protein kinase 1	207.307	-0.734953	0.166683	-4.40928	1.03713e-05	8.89135e-05	138.215	174.575	150.569	250.275	146.586	164.313	158.802	174.179	114.692	242.366	190.172	143.53	174.94	202.464	128.463	351.885	148.321	245.831	278.598	172.101	144.145	186.011	415.255	218.852	137.179	214.512	205.109	293.313	161.939	330.781	131.531	254.587	267.735	376.552	187.951	230.249	195.298	235.171	147.927
ENSSSCG00000000765	IL17RA	interleukin 17 receptor A	127.748	0.871838	0.142473	6.1193	9.39847e-10	2.1946e-08	113.085	72.1802	59.2793	108.292	80.4572	186.804	185.477	207.495	213.673	131.679	93.4926	199.439	154.492	107.816	104.98	134.224	204.192	109.258	57.3585	213.525	170.563	108.449	127.455	75.9282	67.9103	72.0761	76.5741	55.342	210.04	78.0726	211.336	114.479	110.179	103.48	79.2563	174.201	85.679	222.131	101.834
ENSSSCG00000000767	-	ATPase H+ transporting V1 subunit E1	3892.91	-1.39056	0.178562	-7.78756	6.83131e-15	3.56676e-13	4533.44	7041.77	4589.4	5142.67	5654.05	2096.71	1852.27	2080.79	2293.06	7917.94	4937.04	1694.25	3427.23	3065.76	3606.63	5581.18	1366.24	5081.95	6864.99	1052.56	728.932	2593.17	2960.23	4361.41	4749.64	5846.75	5537.95	6948.19	1968.39	5189.78	1236.49	3962.32	5837.29	4650.85	3705.8	2068.2	4324.27	876.785	4397.07
ENSSSCG00000000770	MICAL3	microtubule associated monooxygenase, calponin and LIM domain containing 3	9.32087	-1.37218	0.531026	-2.58403	0.00976547	0.0317244	8.79549	5.03583	11.8559	3.60974	3.30646	3.12382	1.66721	1.75348	5.49894	19.084	2.12483	7.51982	6.81583	4.93814	4.14396	12.6969	4.01953	4.31283	4.91644	2.25953	3.5908	3.43193	0	10.0493	16.2985	18.8771	2.73479	52.5749	9.0857	28.7636	8.37461	18.795	2.20358	33.0561	11.3223	5.04931	15.1198	4.56433	2.14386
ENSSSCG00000000774	USP18	ubiquitin specific peptidase 18	140.809	-3.63345	0.309987	-11.7213	9.91549e-32	3.49802e-29	231.196	191.361	271.499	103.479	182.957	18.7429	24.1746	30.9781	19.6391	288.168	212.483	13.0779	204.475	158.021	267.976	246.682	14.4703	142.323	181.908	8.28494	16.1586	157.869	46.2537	225.551	346.342	151.017	144.944	168.793	9.0857	133.545	8.86723	334.892	188.406	100.605	269.472	2.52466	153.718	10.4327	211.171
ENSSSCG00000000784	LRRK2	leucine rich repeat kinase 2	363.34	-1.24423	0.343875	-3.61826	0.000296589	0.0016781	554.116	468.332	509.802	537.851	341.667	184.93	198.398	173.01	121.762	131.679	955.112	153.993	352.151	481.469	669.941	290.214	178.065	704.429	324.485	119.002	171.076	1259.52	263.132	349.493	453.641	367.245	615.328	99.6157	155.526	240.382	187.197	76.8886	156.454	367.929	532.15	151.479	318.776	140.407	813.597
ENSSSCG00000000798	TWF1	twinfilin actin binding protein 1	88.8024	-0.712584	0.269456	-2.64453	0.00818056	0.0275279	120.624	100.717	189.694	89.0402	70.5378	56.8535	45.0147	36.2386	68.344	40.0763	86.0557	34.6566	64.7504	90.5326	138.132	94.3196	43.4109	57.5044	208.129	58.3712	26.418	70.0114	35.9751	93.7937	169.776	120.127	153.148	177.095	75.3579	90.3999	40.8878	87.1404	87.0416	125.038	173.232	49.4833	107.099	27.1686	61.1001
ENSSSCG00000000799	IRAK4	interleukin 1 receptor associated kinase 4	25.7266	-0.551642	0.266091	-2.07313	0.03816	0.0942661	41.4644	21.8219	30.8252	21.6584	25.3495	19.3677	21.257	28.6401	18.068	17.1756	33.9973	17.6552	32.9432	32.9209	27.6264	16.3245	21.3035	34.5026	13.1105	22.2187	20.5188	49.4198	25.6965	22.3318	32.5969	5.14829	46.4914	19.3697	14.4302	10.2727	22.1681	20.5036	15.4251	34.4933	44.1571	18.1775	28.9797	23.4737	51.4527
ENSSSCG00000000800	PUS7L	pseudouridine synthase 7 like	9.45653	0.81016	0.359355	2.25449	0.0241656	0.0653748	12.565	15.1075	2.37117	8.42272	5.51077	9.99622	7.91926	7.01391	13.3546	1.9084	4.24966	9.15456	9.08778	19.7526	6.9066	16.3245	14.0684	1.43761	8.19407	16.5699	11.7983	7.55025	6.16715	15.6323	14.9403	10.2966	5.46958	0	16.0336	4.10909	10.3451	5.12591	3.30538	18.6839	2.26447	14.1381	8.81989	14.5624	9.64739
ENSSSCG00000000804	ANO6	anoctamin 6	177.243	-0.979409	0.264106	-3.70839	0.000208579	0.00123361	296.533	389.437	374.645	287.576	81.5593	84.9679	79.1926	75.9841	135.117	146.946	210.358	107.239	143.132	184.357	205.817	174.128	82.8023	165.325	363.817	79.8367	67.9687	212.78	45.2258	226.668	175.208	293.453	161.353	285.012	125.596	160.254	76.8494	134.982	153.149	316.189	269.472	84.8285	260.817	53.4678	140.423
ENSSSCG00000000807	-	solute carrier family 38 member 1	17.3172	0.675529	0.321256	2.10277	0.0354857	0.0890588	30.1559	8.39305	15.4126	36.0974	7.71507	23.741	27.0922	34.4851	21.2102	9.54198	7.43691	43.1572	26.1274	19.7526	16.5759	9.06919	18.0879	4.31283	13.1105	18.0762	27.444	24.7099	17.4736	23.4484	21.7313	18.8771	16.4087	5.5342	15.4991	4.10909	20.6902	0	5.50896	11.4978	12.4546	22.217	8.81989	17.6053	11.7913
ENSSSCG00000000808	SLC38A2	solute carrier family 38 member 2	341.885	-0.556775	0.134491	-4.13988	3.47489e-05	0.000258154	378.206	280.328	305.881	381.429	203.898	306.759	305.933	286.401	199.533	349.236	343.16	253.712	352.151	313.572	331.517	504.247	239.162	401.093	345.79	256.457	226.22	400.849	453.286	362.892	323.253	351.8	470.384	406.764	253.331	433.509	220.203	398.112	380.118	416.794	246.827	374.659	352.796	479.472	443.78
ENSSSCG00000000841	APPL2	adaptor protein, phosphotyrosine interacting with PH domain and leucine zipper 2	13.5373	0.660528	0.322015	2.05123	0.0402442	0.0981059	3.76949	6.71444	11.8559	24.0649	17.6345	12.4953	22.0906	18.1193	16.4968	11.4504	4.24966	18.963	6.81583	6.58419	5.52528	14.5107	17.284	4.31283	13.1105	10.5445	24.8791	11.6686	17.4736	5.58296	5.43282	15.4449	10.9392	16.6026	17.1025	14.3818	28.0796	11.9604	7.71254	4.31166	13.5868	25.7515	26.4597	14.345	9.64739
ENSSSCG00000000843	TXNRD1	thioredoxin reductase 1	58.5319	-0.694244	0.189523	-3.66312	0.000249162	0.00144506	64.0814	65.4658	47.4234	80.6174	76.0486	39.9849	38.3459	39.161	41.6349	40.0763	86.0557	41.8494	51.1187	88.0635	67.6847	72.5535	40.9992	89.1318	65.5526	35.3993	38.9858	91.9757	63.7273	27.9148	43.4626	60.0634	76.5741	105.15	53.4453	55.4727	36.9468	35.8813	47.377	83.3588	64.5373	43.929	49.1394	46.73	86.8265
ENSSSCG00000000846	HCFC2	host cell factor C2	13.523	0.501115	0.241298	2.07674	0.0378254	0.0936422	7.53899	6.71444	17.7838	9.62596	7.71507	15.6191	14.1713	18.1193	12.569	9.54198	10.6242	17.0013	10.2237	13.9914	22.1011	10.883	19.2937	17.2513	8.19407	28.2441	22.0578	15.1005	15.4179	12.2825	12.2238	13.7288	21.8783	5.5342	18.7058	16.4363	18.7197	10.2518	3.30538	11.4978	6.7934	17.6726	5.03994	12.8236	10.7193
ENSSSCG00000000854	-	stabilin 2	16.7254	-1.28197	0.375478	-3.41424	0.000639591	0.00328943	15.078	72.1802	23.7117	26.4714	23.1452	4.99811	2.08402	6.42942	9.42676	15.2672	18.0611	17.9822	14.7676	18.1065	16.5759	3.62768	2.41172	20.1265	18.027	2.63612	4.87323	12.3549	4.11144	34.6143	24.4477	24.0254	5.46958	33.2052	12.2924	12.3273	6.40411	8.54318	12.1197	27.3072	23.7769	6.56411	47.8794	4.78167	16.079
ENSSSCG00000000870	ARL1	ADP ribosylation factor like GTPase 1	8.08468	0.977491	0.32323	3.02414	0.00249343	0.0103192	8.79549	3.35722	4.74234	4.81298	3.30646	11.8705	16.6721	10.5209	16.4968	0	10.6242	12.424	6.81583	5.76117	9.66925	16.3245	13.2644	11.5009	0	10.5445	11.7983	3.43193	6.16715	6.69955	8.14923	8.58049	10.9392	2.7671	10.1546	2.05454	6.40411	1.70864	5.50896	10.0605	3.3967	8.0789	10.0799	12.1715	9.64739
ENSSSCG00000000874	GAS2L3	growth arrest specific 2 like 3	1.92947	-2.94125	1.08962	-2.69933	0.0069479	0.0240623	0	0	1.18559	2.40649	3.30646	0.624764	1.25041	0	0	20.9924	0	0	1.13597	0	1.38132	0	0	0	0	0	0.256486	0	4.11144	1.11659	0	3.4322	0	2.7671	0	6.16363	1.9705	6.83454	4.40717	5.74888	1.13223	0.504931	1.25998	3.26023	0
ENSSSCG00000000877	SCYL2	SCY1 like pseudokinase 2	45.0931	-0.759582	0.179234	-4.23794	2.25576e-05	0.000177269	51.5164	48.6797	39.1243	51.7395	28.656	30.6134	24.1746	28.0557	35.3503	53.4351	57.3704	31.3871	43.1669	63.3728	62.1594	56.229	31.3523	54.6292	27.8598	29.7505	31.2912	60.402	40.0865	26.7982	43.4626	36.0381	46.4914	66.4105	28.8605	69.8545	35.9616	68.3454	30.8502	58.9261	65.6695	40.8994	44.0995	31.9503	83.6107
ENSSSCG00000000891	LTA4H	leukotriene A4 hydrolase	100.37	-1.64006	0.277792	-5.9039	3.55001e-09	7.22907e-08	135.702	134.289	99.5891	231.023	95.8873	60.6021	43.7643	36.823	58.1317	171.756	212.483	38.253	82.926	175.304	109.124	192.267	46.6265	254.457	104.884	47.8267	35.6515	228.567	112.037	53.5964	63.8356	44.6185	43.7567	91.3144	42.2218	76.0181	34.4837	71.7627	87.0416	160.969	147.19	26.2564	61.7393	25.8645	175.797
ENSSSCG00000000892	HAL	histidine ammonia-lyase	6.6583	-3.39966	0.862133	-3.94332	8.03623e-05	0.000543766	11.3085	1.67861	3.55676	22.8617	3.30646	0	2.50082	1.16899	0	0	9.56174	0	13.6317	17.2835	19.3385	21.7661	2.00976	18.6889	11.4717	0.753176	0.256486	21.9644	4.11144	0	4.07462	0	0	0	1.06891	0	0	6.83454	12.1197	15.8094	7.92563	1.00986	0	2.17349	21.4386
ENSSSCG00000000907	PLXNC1	plexin C1	111.4	1.75359	0.359075	4.88362	1.04153e-06	1.19151e-05	74.1334	88.9663	50.9802	91.4466	29.7581	269.273	178.392	207.495	231.741	24.8091	139.176	125.548	153.356	64.1958	146.42	54.4151	166.007	100.633	39.3315	257.21	135.681	136.591	19.5293	52.4798	63.8356	56.6312	51.961	24.9039	204.161	47.2545	225.129	22.2123	24.2394	74.7355	98.5043	127.748	40.3195	258.862	186.516
ENSSSCG00000000925	C12orf29	chromosome 5 C12orf29 homolog	10.2892	0.654785	0.305606	2.14258	0.032147	0.0823904	11.3085	13.4289	9.48468	7.21947	3.30646	14.3696	7.50245	11.6899	7.85563	0	4.24966	10.4624	9.08778	13.9914	11.0506	9.06919	12.8625	5.75044	8.19407	19.5826	13.3372	8.92302	17.4736	22.3318	12.2238	15.4449	8.20437	2.7671	16.0336	6.16363	12.8082	8.54318	7.71254	5.74888	5.66117	15.6529	13.8598	9.346	8.57546
ENSSSCG00000000926	CEP290	centrosomal protein 290	9.50004	1.22797	0.332635	3.69164	0.000222811	0.00130771	3.76949	1.67861	5.92793	1.20325	12.1237	15.6191	15.8385	18.7038	14.9257	0	9.56174	12.751	9.08778	6.58419	5.52528	9.06919	14.8723	8.62566	0	24.1016	23.8532	13.0413	9.25073	7.81614	14.9403	5.14829	0	16.6026	13.3613	6.16363	9.35986	6.83454	6.61075	1.43722	4.52893	15.6529	8.81989	12.8236	4.28773
ENSSSCG00000000927	TMTC3	transmembrane O-mannosyltransferase targeting cadherins 3	4.95287	1.42146	0.466797	3.04512	0.00232584	0.00973362	0	6.71444	3.55676	4.81298	5.51077	11.2458	7.08565	11.1054	1.57113	0	5.31208	7.51982	0	2.46907	6.9066	5.44151	10.8527	2.87522	3.27763	12.0508	11.0289	0.686386	9.25073	3.34977	4.07462	8.58049	2.73479	0	4.81008	2.05454	5.91149	1.70864	1.10179	4.31166	3.3967	8.58383	3.77995	4.12963	5.35966
ENSSSCG00000000950	E2F7	E2F transcription factor 7	5.24752	-2.46418	0.614316	-4.01126	6.03952e-05	0.000420162	5.02599	1.67861	3.55676	0	2.20431	0.624764	0.416803	1.75348	3.14225	3.81679	8.49932	1.63474	0	6.58419	5.52528	16.3245	1.20586	7.18805	4.91644	1.12976	2.05188	6.17747	20.5572	2.23318	6.79103	5.14829	2.73479	0	0.534453	20.5454	0	20.5036	13.2215	8.62333	5.66117	4.54438	2.51997	5.43372	2.14386
ENSSSCG00000000952	ZDHHC17	zinc finger DHHC-type containing 17	28.3711	0.792141	0.25999	3.04681	0.00231282	0.00969467	16.3345	28.5364	39.1243	18.0487	35.2689	51.2306	39.5963	38.5765	22.7813	3.81679	26.5604	32.6949	13.6317	27.9828	30.3891	41.7183	33.764	14.3761	36.0539	39.1652	54.1185	29.5146	40.0865	27.9148	32.5969	8.58049	21.8783	8.30131	24.0504	18.4909	42.3657	10.2518	16.5269	12.935	22.6447	32.8205	31.4996	41.5136	40.7334
ENSSSCG00000000955	TBC1D22A	TBC1 domain family member 22A	31.0886	0.663454	0.199626	3.32349	0.000888999	0.00432183	16.3345	26.8577	15.4126	21.6584	25.3495	46.2325	44.1811	31.5626	40.8493	11.4504	23.3731	33.3488	44.3029	20.5756	40.0583	36.2768	48.6363	23.0018	39.3315	24.4782	37.7034	30.201	17.4736	29.0314	21.7313	30.8898	38.2871	47.0407	35.2739	20.5454	33.4984	27.3382	38.5627	20.1211	32.8348	29.7909	46.6194	36.5146	25.7264
ENSSSCG00000000958	DYRK2	dual specificity tyrosine phosphorylation regulated kinase 2	87.6319	0.99528	0.215366	4.62135	3.81248e-06	3.69481e-05	67.8509	72.1802	67.5783	20.4552	45.1883	129.326	124.624	140.863	111.55	55.3435	50.9959	163.474	73.8382	73.2491	91.1672	29.0214	138.674	18.6889	73.7466	132.936	157.739	91.2893	80.173	138.457	90.9997	90.9532	103.922	52.5749	110.097	102.727	108.377	71.7627	68.3111	43.1166	81.5208	110.58	65.5192	98.0243	70.7475
ENSSSCG00000000964	LMF2	lipase maturation factor 2	16.1555	0.655305	0.315663	2.07596	0.0378975	0.093742	18.8475	8.39305	13.0414	19.2519	8.81723	21.8667	20.8402	19.8728	20.4246	3.81679	11.6866	23.5403	22.7194	16.4605	13.8132	3.62768	22.1074	10.0633	3.27763	14.6869	25.1356	6.17747	18.5015	17.8655	20.3731	1.7161	2.73479	16.6026	17.1025	8.21817	32.0206	20.5036	26.443	12.935	15.8513	17.6726	10.0799	27.6033	35.3738
ENSSSCG00000000968	SBF1	SET binding factor 1	377.709	0.887503	0.0880622	10.0781	6.90269e-24	1.06001e-21	314.124	256.827	355.676	310.437	297.581	573.533	557.682	506.755	494.905	309.16	341.035	553.197	424.854	332.502	317.704	257.565	565.548	304.773	276.96	613.462	538.363	387.808	299.107	360.659	290.656	291.737	265.275	262.875	567.054	277.363	473.904	247.752	315.112	222.769	296.645	497.862	292.316	527.506	351.594
ENSSSCG00000000970	PPP6R2	protein phosphatase 6 regulatory subunit 2	115.96	0.324344	0.12585	2.57722	0.00995987	0.0322196	113.085	104.074	92.4756	95.0564	126.748	156.191	133.377	126.25	153.97	104.962	125.365	136.338	123.821	107.816	107.743	81.6227	141.085	150.949	108.162	146.869	153.635	157.869	131.566	91.5605	114.089	84.0888	131.27	88.5473	128.269	119.163	128.575	87.1404	80.4308	58.9261	96.2398	107.045	73.0791	130.627	124.344
ENSSSCG00000000971	HDAC10	histone deacetylase 10	35.7922	0.953605	0.188519	5.0584	4.22779e-07	5.37346e-06	26.3865	5.03583	20.1549	28.8779	23.1452	51.8554	62.5205	56.6958	65.2018	45.8015	35.0597	59.5046	31.8072	31.2749	27.6264	23.5799	61.4988	21.5641	16.3881	51.5926	65.1473	19.9052	41.1144	23.4484	48.8954	29.1737	24.6131	22.1368	51.8419	30.8181	54.1886	20.5036	36.3591	21.5583	19.248	36.86	20.1598	54.3372	30.0141
ENSSSCG00000000972	TUBGCP6	tubulin gamma complex associated protein 6	40.9674	0.366901	0.163994	2.23729	0.0252677	0.0678919	25.13	31.8936	47.4234	42.1136	20.9409	52.4802	61.6868	43.2525	41.6349	36.2595	54.1832	59.5046	39.759	20.5756	35.9143	52.6013	48.2343	31.6274	36.0539	54.9819	54.8879	46.6743	40.0865	27.9148	46.179	24.0254	30.0827	52.5749	53.4453	32.8727	52.7108	46.1331	39.6645	33.0561	26.0414	44.9389	25.1997	53.9025	31.086
ENSSSCG00000000980	ALG12	ALG12 alpha-1,6-mannosyltransferase	32.6695	0.810798	0.19882	4.07805	4.54144e-05	0.000327692	16.3345	18.4647	35.5676	28.8779	48.4947	34.362	45.8483	56.1113	34.5648	17.1756	24.4356	29.7523	52.2547	32.9209	26.2451	7.25535	47.8324	27.3146	31.1375	47.0735	44.6285	26.0827	31.8636	26.7982	31.2387	15.4449	30.0827	19.3697	42.7562	34.9272	40.3952	29.0468	17.6287	25.87	37.3637	47.4635	37.7995	47.5994	25.7264
ENSSSCG00000000982	TTLL8	tubulin tyrosine ligase like 8	0.635618	-3.20662	1.43399	-2.23615	0.0253418	0.0680351	1.2565	0	1.18559	6.01623	3.30646	0	0	0	0	0	1.06242	0	0	0.823024	0	1.81384	0	1.43761	0	0	0	1.37277	0	0	1.35821	0	0	0	0	0	0.492624	0	0	0	0	0	2.51997	0	2.14386
ENSSSCG00000000983	-	interleukin 17 receptor E like	1.10162	-4.07914	1.65441	-2.46562	0.0136775	0.0414036	2.513	0	5.92793	0	5.51077	0	0	0	0	0	0	0	2.27194	0.823024	1.38132	12.6969	0	4.31283	0	0	0	0.686386	0	0	0	0	0	0	0	2.05454	0	0	0	0	2.26447	0	2.51997	0	0
ENSSSCG00000000998	RPP40	ribonuclease P/MRP subunit p40	11.8372	0.803078	0.298546	2.68997	0.00714591	0.0246101	1.2565	10.0717	13.0414	9.62596	8.81723	8.74669	13.3377	15.7813	21.2102	7.63358	5.31208	7.19287	13.6317	7.40721	13.8132	7.25535	16.4801	8.62566	13.1105	19.5826	19.4929	3.43193	7.19501	16.7489	10.8656	22.3093	8.20437	16.6026	16.0336	20.5454	12.3156	13.6691	9.91613	5.74888	11.3223	13.6331	11.3399	13.9103	6.43159
ENSSSCG00000001004	SLC22A23	solute carrier family 22 member 23	131.222	-1.42543	0.249423	-5.71491	1.09759e-08	2.01786e-07	98.0068	119.181	157.683	105.886	128.952	46.2325	44.5979	45.5904	69.1296	240.458	100.929	34.9835	145.404	105.347	77.354	194.081	54.2636	198.39	145.854	34.6461	26.418	119.431	208.655	169.722	108.656	132.14	117.596	439.969	63.5999	197.236	34.9763	309.263	217.053	198.337	96.2398	178.241	154.978	101.719	96.4739
ENSSSCG00000001008	BPHL	biphenyl hydrolase like	20.4726	1.21718	0.257864	4.72024	2.35563e-06	2.42253e-05	11.3085	5.03583	14.227	8.42272	31.9624	45.6078	37.0955	35.0696	47.1338	9.54198	11.6866	35.3105	14.7676	15.6375	29.0077	9.06919	29.7445	25.877	13.1105	26.3612	31.8042	19.9052	15.4179	17.8655	21.7313	12.0127	8.20437	5.5342	20.3092	20.5454	26.6017	27.3382	12.1197	5.74888	12.4546	23.7318	23.9397	23.2563	13.9351
ENSSSCG00000001010	WRNIP1	WRN helicase interacting protein 1	71.3145	0.630798	0.138884	4.54189	5.57524e-06	5.1944e-05	65.3379	36.9294	68.7639	50.5363	77.1507	89.966	97.1151	87.6739	83.2697	74.4274	62.6825	85.3336	61.3425	83.1254	58.0155	41.7183	111.743	25.877	72.1078	105.821	92.8478	62.4611	69.8944	58.0628	89.6415	75.5083	71.1046	58.1091	91.3914	65.7454	81.283	54.6763	60.5986	48.8655	63.4051	62.1066	56.6993	98.459	81.4668
ENSSSCG00000001024	RIOK1	RIO kinase 1	28.4605	0.466051	0.186342	2.50106	0.0123824	0.0382369	26.3865	25.1791	41.4955	24.0649	34.1667	36.8611	41.6803	29.2246	27.4947	20.9924	37.1845	42.1764	29.5353	24.6907	16.5759	25.3937	30.9504	21.5641	27.8598	44.0608	36.9339	32.2601	25.6965	27.9148	25.8059	25.7415	5.46958	22.1368	27.7915	18.4909	28.5722	34.1727	20.934	12.935	21.5124	27.2663	36.5396	31.5156	40.7334
ENSSSCG00000001038	-	transmembrane protein 14C	147.726	-0.752295	0.198532	-3.78928	0.000151085	0.00093465	131.932	229.969	179.023	208.161	229.248	98.7127	75.4413	88.8429	145.329	230.916	150.863	103.316	85.1979	91.3556	91.1672	166.873	53.0578	120.759	216.323	62.137	48.9887	116.686	90.4516	98.26	78.7759	173.326	112.126	315.45	123.993	178.745	73.8936	223.831	310.705	175.341	177.761	148.45	251.997	149.536	154.358
ENSSSCG00000001052	PHACTR1	phosphatase and actin regulator 1	81.7069	-0.842852	0.178315	-4.72677	2.28122e-06	2.35204e-05	86.6984	107.431	67.5783	141.983	83.7636	79.345	61.6868	61.3717	98.981	145.038	58.4329	69.967	71.5662	102.878	49.7276	132.41	57.8812	125.072	91.7736	54.2287	52.5795	76.1889	112.037	87.0941	55.6864	56.6312	79.3089	124.52	49.7041	115.054	63.0559	83.7231	147.64	71.8611	83.7853	35.8501	44.0995	49.5555	50.3808
ENSSSCG00000001063	MYLIP	myosin regulatory light chain interacting protein	42.4079	1.22826	0.229	5.36358	8.15872e-08	1.21624e-06	31.4124	20.1433	45.0522	24.0649	15.4301	51.8554	80.8598	68.9701	40.8493	5.72519	7.43691	70.6209	52.2547	23.0447	34.533	32.6491	73.1554	38.8155	36.0539	54.9819	55.9139	24.7099	23.6408	25.6816	52.97	39.4703	16.4087	30.4381	72.6856	43.1454	86.2092	29.0468	29.7484	28.7444	45.2893	68.6707	31.4996	95.6335	46.0931
ENSSSCG00000001064	-	guanosine monophosphate reductase	58.6943	-0.958486	0.301964	-3.17417	0.00150265	0.00669653	31.4124	68.823	79.4342	91.4466	69.4357	30.6134	20.8402	30.9781	56.5606	87.7862	70.1194	32.041	40.895	134.976	89.7859	70.7397	20.0976	63.2548	109.801	37.2822	27.444	27.4554	79.1451	65.8789	19.0149	39.4703	57.4306	113.451	54.5142	59.5817	17.7345	71.7627	73.8201	117.852	48.686	43.4241	69.2992	39.9922	26.7983
ENSSSCG00000001070	FAM8A1	family with sequence similarity 8 member A1	17.4284	1.0038	0.271165	3.7018	0.000214077	0.00126269	12.565	16.7861	10.6703	12.0325	8.81723	21.242	24.1746	17.5348	25.138	5.72519	11.6866	20.2708	32.9432	26.3368	22.1011	1.81384	23.7152	7.18805	6.55526	23.7251	23.0837	16.4733	19.5293	7.81614	24.4477	30.8898	13.674	16.6026	29.3949	18.4909	28.0796	6.83454	5.50896	20.1211	11.3223	21.2071	13.8598	29.5594	11.7913
ENSSSCG00000001073	TPMT	thiopurine S-methyltransferase	9.51792	-1.21667	0.366733	-3.31758	0.000907998	0.00438804	15.078	11.7503	15.4126	13.2357	3.30646	1.87429	2.91762	4.67594	8.6412	7.63358	7.43691	2.94254	12.4957	13.1684	6.9066	16.3245	2.00976	17.2513	19.6658	3.01271	2.82134	16.4733	13.3622	4.46637	16.2985	1.7161	10.9392	5.5342	9.62015	12.3273	2.95574	8.54318	4.40717	15.8094	16.9835	8.58383	17.6398	3.04288	13.9351
ENSSSCG00000001075	DEK	DEK proto-oncogene	240.659	-0.806131	0.14766	-5.45937	4.77835e-08	7.54193e-07	299.046	218.219	256.086	179.284	306.399	133.699	167.972	137.94	139.83	276.717	296.414	144.184	182.892	191.765	263.832	286.586	174.849	148.074	231.073	143.48	121.831	228.567	181.931	238.951	306.954	262.563	404.749	343.121	164.611	443.781	194.587	258.004	381.22	301.816	329.48	167.637	291.057	183.442	403.047
ENSSSCG00000001087	MRS2	magnesium transporter MRS2	14.6528	0.915963	0.319156	2.86995	0.00410538	0.0156603	6.28249	6.71444	16.5982	8.42272	12.1237	19.9924	18.7561	26.8867	14.9257	1.9084	12.749	24.5211	6.81583	16.4605	35.9143	0	14.0684	10.0633	14.7493	28.9973	24.8791	16.4733	12.3343	31.2646	14.9403	12.0127	0	16.6026	16.0336	14.3818	12.8082	13.6691	11.0179	7.18611	9.05787	22.7219	15.1198	15.4318	8.57546
ENSSSCG00000001095	GMNN	geminin DNA replication inhibitor	13.9327	-1.01304	0.329342	-3.07596	0.00209828	0.00890985	18.8475	8.39305	2.37117	26.4714	24.2474	7.49717	16.2553	8.76739	7.85563	36.2595	6.37449	7.51982	15.9036	8.23024	11.0506	19.9522	11.2547	10.0633	11.4717	11.6742	11.5419	14.4141	16.4457	12.2825	6.79103	18.8771	10.9392	5.5342	6.94789	12.3273	19.705	32.4641	30.8502	17.2467	19.248	8.0789	7.55991	16.3012	5.35966
ENSSSCG00000001137	H1-3	H1.3 linker histone, cluster member	150.126	-0.68049	0.32558	-2.09009	0.0366098	0.0912484	90.4678	171.218	77.063	119.121	246.882	81.2193	80.8598	76.5686	69.9151	160.305	53.1208	61.7933	237.418	111.108	44.2023	101.575	82.4003	83.3813	70.469	74.941	56.4268	94.7213	126.427	119.475	198.298	159.597	161.353	130.054	106.356	552.672	99.0174	309.263	159.76	173.904	187.951	174.201	188.998	508.379	254.048
ENSSSCG00000001164	ZNF184	zinc finger protein 184	8.2644	1.22475	0.428633	2.85735	0.004272	0.0161865	5.02599	15.1075	8.2991	8.42272	2.20431	11.2458	10.8369	9.35188	6.28451	0	12.749	16.3474	3.40792	7.40721	2.76264	0	12.8625	2.87522	18.027	14.6869	15.9021	0.686386	4.11144	10.0493	17.6567	8.58049	0	8.30131	13.8958	4.10909	12.8082	8.54318	4.40717	12.935	2.26447	8.0789	7.55991	11.3021	3.2158
ENSSSCG00000001201	ZKSCAN8	zinc finger with KRAB and SCAN domains 8	12.657	1.49342	0.338423	4.4129	1.01996e-05	8.77045e-05	3.76949	8.39305	20.1549	3.60974	7.71507	24.9906	19.5897	22.7952	16.4968	0	14.8738	11.1163	24.9914	10.6993	17.9572	19.9522	12.0586	1.43761	4.91644	22.9719	25.1356	7.55025	13.3622	13.3991	9.50744	15.4449	8.20437	8.30131	22.9815	10.2727	12.3156	1.70864	9.91613	4.31166	13.5868	18.1775	13.8598	11.7368	5.35966
ENSSSCG00000001229	-	patr class I histocompatibility antigen, A-126 alpha chain-like	1010.62	-0.704498	0.195952	-3.59526	0.000324069	0.00181237	1793.02	1567.82	1779.56	1064.87	1322.58	823.439	266.754	730.031	1361.38	2124.04	1870.91	1050.49	854.251	1365.4	799.785	506.061	289.808	1715.07	586.695	355.499	186.978	923.876	429.645	738.067	582.67	600.634	866.929	965.719	979.118	1103.29	447.303	1406.21	1010.34	1283.44	1614.56	849.799	1224.71	772.675	1200.56
ENSSSCG00000001233	TRIM26	tripartite motif containing 26	192.954	-1.36937	0.204998	-6.67991	2.39093e-11	7.68689e-10	231.196	260.184	264.385	96.2596	210.511	89.3412	84.1942	99.9483	87.9831	250	200.797	93.5073	207.883	242.792	222.393	273.89	89.2335	178.264	196.658	75.6942	83.6143	170.91	96.6187	283.614	251.268	241.97	139.474	318.217	95.6671	209.563	76.3567	606.565	266.634	224.207	246.827	71.1953	335.156	93.8947	258.336
ENSSSCG00000001234	TRIM10	tripartite motif containing 10	323.758	-1.50458	0.316554	-4.75298	2.00438e-06	2.09977e-05	163.345	340.758	195.622	227.413	241.372	119.955	104.618	115.73	131.189	601.145	258.167	90.5648	441.893	142.383	157.471	469.784	88.0277	549.167	458.868	62.8902	56.1703	228.567	484.122	331.628	209.164	315.762	546.958	971.253	163.008	460.218	61.0854	594.605	570.728	534.646	395.149	511.495	472.494	456.867	302.285
ENSSSCG00000001235	TRIM15	tripartite motif containing 15	18.267	-1.69264	0.375885	-4.50308	6.69756e-06	6.07106e-05	16.3345	15.1075	4.74234	10.8292	7.71507	4.37335	11.6705	5.84493	7.85563	59.1603	6.37449	5.23118	23.8554	7.40721	13.8132	34.4629	7.6371	21.5641	19.6658	3.76588	4.36025	13.0413	15.4179	13.3991	23.0895	13.7288	38.2871	49.8078	4.81008	34.9272	5.41886	42.7159	36.3591	17.2467	12.4546	17.1677	36.5396	25.8645	20.3667
ENSSSCG00000001236	TRIM40	tripartite motif containing 40	5.3147	-1.76854	0.679012	-2.60458	0.00919864	0.0302519	5.02599	0	1.18559	0	2.20431	0.624764	1.66721	0.584493	0.785563	13.3588	2.12483	0	5.67986	12.3454	4.14396	10.883	2.81367	12.9385	6.55526	0.376588	0.769457	10.2958	4.11144	7.81614	9.50744	6.86439	8.20437	13.8355	0.534453	10.2727	0.492624	15.3777	0	7.18611	6.7934	11.6134	3.77995	6.52047	0
ENSSSCG00000001242	GABBR1	gamma-aminobutyric acid type B receptor subunit 1	55.0274	1.11628	0.211688	5.27324	1.34033e-07	1.90789e-06	42.7209	15.1075	52.1657	39.7071	33.0646	56.8535	107.952	94.1033	76.9852	40.0763	53.1208	96.1229	39.759	39.5051	60.7781	14.5107	129.429	21.5641	50.8032	115.613	101.055	36.3785	65.783	42.4305	35.3133	36.0381	46.4914	22.1368	78.0301	43.1454	80.7903	70.054	45.1735	31.6189	33.967	86.8482	28.9797	62.5965	19.2948
ENSSSCG00000001252	UBD	ubiquitin D	57.0211	-1.86719	0.398751	-4.68259	2.83276e-06	2.8374e-05	76.6464	68.823	113.816	42.1136	92.5809	34.362	10.0033	50.8509	19.6391	78.2442	24.4356	10.7893	47.7108	97.9398	84.2606	34.4629	15.2742	14.3761	127.828	21.8421	7.43808	51.479	78.1173	160.789	99.149	147.584	79.3089	55.342	9.0857	36.9818	5.41886	145.234	49.5806	33.0561	58.8761	16.6627	84.419	4.99902	34.3018
ENSSSCG00000001341	-	-	1765.67	-1.2046	0.147061	-8.1912	2.58635e-16	1.6309e-14	2207.67	2791.53	2700.76	1792.84	1957.42	674.12	729.822	808.938	1119.43	2908.4	2670.91	963.191	1653.98	1831.23	2368.97	1906.34	723.113	1936.46	2073.1	589.737	540.672	1653.5	689.693	2200.8	1889.26	2035.29	1733.86	3337.13	1022.41	2029.89	925.148	1982.02	2298.34	1862.64	2870.21	887.669	3134.84	702.471	2657.32
ENSSSCG00000001379	TUBB	tubulin beta class I	303.371	-0.730333	0.167455	-4.36138	1.29247e-05	0.000108145	267.634	276.971	205.106	364.583	385.754	207.422	238.411	205.157	220.743	526.717	282.603	209.247	162.444	257.606	186.478	395.417	280.563	286.084	345.79	257.963	234.684	218.957	486.177	244.534	245.835	315.762	265.275	492.544	268.295	507.472	238.43	500.63	540.98	438.352	272.868	227.219	347.756	236.476	186.516
ENSSSCG00000001384	VARS2	valyl-tRNA synthetase 2, mitochondrial	29.3707	0.982664	0.2263	4.34231	1.40995e-05	0.000116601	12.565	23.5005	14.227	14.4389	38.5754	35.6115	40.0131	35.6541	32.9937	3.81679	25.498	47.0806	30.6712	37.0361	37.2957	29.0214	38.1855	12.9385	31.1375	45.5672	50.2712	36.3785	20.5572	33.4977	17.6567	12.0127	8.20437	5.5342	42.7562	30.8181	46.7993	25.6295	29.7484	18.6839	21.5124	44.9389	45.3595	48.9035	20.3667
ENSSSCG00000001394	-	-	13.2882	-1.45571	0.462871	-3.14497	0.00166106	0.00729289	32.6689	33.5722	27.2685	6.01623	20.9409	7.49717	6.25205	9.93638	5.49894	7.63358	9.56174	1.30779	9.08778	14.8144	27.6264	34.4629	7.23515	8.62566	9.83289	3.38929	3.5908	11.6686	4.11144	18.9821	39.3879	20.5932	0	19.3697	1.06891	22.6	6.40411	10.2518	12.1197	1.43722	16.9835	2.01973	20.1598	2.82553	21.4386
ENSSSCG00000001400	DDX39B	DExD-box helicase 39B	675.176	0.401298	0.122312	3.28093	0.00103465	0.00488084	787.824	464.975	669.856	712.321	580.835	1042.73	864.866	865.049	713.291	437.023	729.879	682.015	826.988	796.687	729.337	515.13	820.386	531.915	539.17	1069.89	923.861	781.107	716.418	661.022	672.312	612.647	577.041	379.093	660.049	505.418	743.862	473.292	608.189	533.209	550.265	583.196	558.173	721.163	691.396
ENSSSCG00000001404	TNF	tumor necrosis factor	32.3467	-2.18958	0.331563	-6.60381	4.0072e-11	1.22784e-09	54.0294	21.8219	30.8252	27.6746	29.7581	15.6191	10.8369	5.84493	11.7834	28.6259	81.806	12.424	42.031	48.5584	34.533	23.5799	13.6664	61.8172	37.6927	15.8167	8.46402	122.863	63.7273	21.2152	14.9403	24.0254	35.5523	38.7394	6.41343	20.5454	10.8377	35.8813	62.8021	63.2377	58.8761	8.58383	22.6797	11.9542	21.4386
ENSSSCG00000001410	BAG6	BCL2 associated athanogene 6	354.842	-0.542876	0.149742	-3.6254	0.000288513	0.00163666	363.128	426.367	405.47	548.68	439.759	269.273	205.484	293.415	302.442	465.649	483.399	265.809	315.8	255.137	439.26	297.469	214.643	402.531	421.175	226.706	188.004	203.857	252.853	452.22	354.492	478.791	333.644	500.845	273.105	312.291	243.356	457.914	575.135	405.296	278.529	333.76	549.353	179.313	424.485
[truncated: 5,166 more rows]

## Sheet: LOWconvsSE
ENSID	GeneName	GeneDescription	baseMean	log2FoldChange	lfcSE	stat	pvalue	padj	IAIPSBlood1	IAIPSBlood2	IAIPSBlood3	IAIPSBlood4	IAIPSBlood5	IAIPSBlood6	IAIPSBlood7	IAIPSBlood8	IAIPSBlood9	IAIPSBlood10	IAIPSBlood11	IAIPSBlood12	IAIPSBlood13	IAIPSBlood14	IAIPSBlood15	IAIPSBlood16	IAIPSBlood17	IAIPSBlood18	IAIPSBlood19	IAIPSBlood20	IAIPSBlood21	IAIPSBlood22	IAIPSBlood23	IAIPSBlood24	IAIPSBlood25	IAIPSBlood26	IAIPSBlood27	IAIPSBlood28	IAIPSBlood29	IAIPSBlood30	IAIPSBlood31	IAIPSBlood32	IAIPSBlood33	IAIPSBlood34	IAIPSBlood35	IAIPSBlood36	IAIPSBlood37	IAIPSBlood38	IAIPSBlood39
[truncated: 5,900 more rows]

[truncated: 1 more sheets: labelcode]
