# Supplementary material for: Altered hepatic metabolism mediates sepsis preventive effects of reduced glucose supply in infected preterm newborns
Source: bioRxiv preprint, doi:10.1101/2023.09.11.557116, version 3 (2024-08-28)
Supplement: Sup. Table 4 [file 557116_file05.xlsx]

## Sheet: 12h
		V1	V2	V3	V4	V5	V6	V7	V8	V9	V10	V11	V12	V13	V14	V15	V16	V17	V18	V19	V20	V21	V22	V23	V24
	sample	BID038	BID035	BID033	BID036	BID034	BID037	BID063	BID064	BID067	BID065	BID066	BID068	BID097	BID098	BID093	BID095	BID096	BID094	BID123	BID124	BID128	BID125	BID126	BID127
	BGS.ID	BID038	BID035	BID033	BID036	BID034	BID037	BID063	BID064	BID067	BID065	BID066	BID068	BID097	BID098	BID093	BID095	BID096	BID094	BID123	BID124	BID128	BID125	BID126	BID127
	Takeda.ID	Ã†3	G2	H1	I2	L1	T2	B1	F1	F2	I1	N1	Q2	Ã˜2	G3	K1	L2	O2	S1	E2	K2	N3	U2	V2	X2
	Study	Sep	Sep	Sep	Sep	Sep	Sep	Sep	Sep	Sep	Sep	Sep	Sep	Sep	Sep	Sep	Sep	Sep	Sep	Sep	Sep	Sep	Sep	Sep	Sep
	Kill.nr	163	135	111	132	113	138	101	105	119	107	102	124	137	164	110	131	134	112	133	141	159	121	127	139
	Letter	Ã†	G	H	I	L	T	B	F	F	I	N	Q	Ã˜	G	K	L	O	S	E	K	N	U	V	X
	Litter	3	2	1	2	1	2	1	1	2	1	1	2	2	3	1	2	2	1	2	2	3	2	2	2						Summary for DEPs
	Group	HIGH_CON	HIGH_CON	HIGH_CON	HIGH_CON	HIGH_CON	HIGH_CON	HIGH_SE	HIGH_SE	HIGH_SE	HIGH_SE	HIGH_SE	HIGH_SE	LOW_CON	LOW_CON	LOW_CON	LOW_CON	LOW_CON	LOW_CON	LOW_SE	LOW_SE	LOW_SE	LOW_SE	LOW_SE	LOW_SE						HIGH_SE - HIGH_CON		LOW_CON - HIGH_CON		LOW_SE - HIGH_CON		LOW_CON - HIGH_SE		HIGH_SE - LOW_SE		LOW_SE - LOW_CON
	Timepoint	12	12	12	12	12	12	12	12	12	12	12	12	12	12	12	12	12	12	12	12	12	12	12	12						rawp	adjp	rawp	adjp	rawp	adjp	rawp	adjp	rawp	adjp	rawp	adjp
	Unit	Hours	Hours	Hours	Hours	Hours	Hours	Hours	Hours	Hours	Hours	Hours	Hours	Hours	Hours	Hours	Hours	Hours	Hours	Hours	Hours	Hours	Hours	Hours	Hours					N(<=0.1)	216	137	163	67	221	149	255	178	244	130	212	123
	Analysis.Group	HIGH-CON 12 Hours	HIGH-CON 12 Hours	HIGH-CON 12 Hours	HIGH-CON 12 Hours	HIGH-CON 12 Hours	HIGH-CON 12 Hours	HIGH-SE 12 Hours	HIGH-SE 12 Hours	HIGH-SE 12 Hours	HIGH-SE 12 Hours	HIGH-SE 12 Hours	HIGH-SE 12 Hours	LOW-CON 12 Hours	LOW-CON 12 Hours	LOW-CON 12 Hours	LOW-CON 12 Hours	LOW-CON 12 Hours	LOW-CON 12 Hours	LOW-PLACEBO 12 Hours	LOW-PLACEBO 12 Hours	LOW-PLACEBO 12 Hours	LOW-PLACEBO 12 Hours	LOW-PLACEBO 12 Hours	LOW-PLACEBO 12 Hours
	Sex	F	F	m	m	F	m	F	F	m	m	m	F	m	F	m	m	m	F	F	m	m	m	m	m
	BW	908	1387	1165	1015.2	1129	1193	1222	1038.5	1189	1075	1468	793.5	902	993	1206.8	1202.8	1031	1004	1260.6	1405	1219	741.5	1281	1111
	Lifespan	22	22.5	22.5	22.25	22.5	22.5	16.5	21	13	21.25	16	20.25	22.25	21.75	22.5	22.25	22.25	22.25	22.25	22	20	18.25	20.25	21.45					HIGH_SE - HIGH_CON			LOW_CON - HIGH_CON			LOW_SE - HIGH_CON			LOW_CON - HIGH_SE			HIGH_SE - LOW_SE			LOW_SE - LOW_CON
ID	sepsis	0	0	0	0	0	0	1	1	1	0	1	1	0	0	0	0	0	0	0	0	0	0	0	0	Accession ID	Gene ID	Protein Name	Protein Description	rawP	adjp	log2FC	rawP	adjp	log2FC	rawP	adjp	log2FC	rawP	adjp	log2FC	rawP	adjp	log2FC	rawP	adjp	log2FC
1	F1SN68	28.5048	28.5707	28.7665	28.4817	28.6307	28.4826	28.7971	28.3582	28.3344	28.687	28.3683	28.6566	28.5775	28.5546	28.7247	28.5677	28.4228	28.5179	28.7702	28.5412	28.3786	28.5761	28.3764	28.2018	F1SN68	ORM1	F1SN68_PIG	Alpha-1-acid glycoprotein	0.962682	0.85373	-0.0392161	0.99999	0.92338	-0.0119307	0.836621	0.83184	-0.098774	0.956725	0.81194	0.0272854	0.982927	0.85274	0.0595579	0.811567	0.86169	-0.0868433
2	F1SFI7	27.6944	27.4882	27.6225	27.399	27.351	27.6143	27.6447	27.2954	27.4587	27.4696	27.5048	27.8982	27.4851	27.7422	27.5781	27.3253	27.4891	27.5334	27.667	27.6745	27.5222	27.1645	27.3719	27.3344	F1SFI7	AHSG	F1SFI7_PIG	Alpha-2-HS-glycoprotein	0.997287	0.85373	0.0169906	0.997687	0.92338	-0.00271461	0.980021	0.83184	-0.0724808	1	0.81194	-0.0197052	0.938104	0.85274	0.0894714	0.936646	0.86169	-0.0697662
3	P29700	27.6261	27.5679	27.6636	27.2366	27.357	26.8826	27.1504	27.3314	27.3665	27.5665	27.5316	27.7593	27.6922	27.6351	27.2478	27.3458	26.8183	27.7638	27.6945	27.5696	26.8954	27.0831	26.8793	26.6115	P29700	AHSG	FETUA_PIG	Alpha-2-HS-glycoprotein (Fragment)	0.979922	0.85373	0.0619898	0.96786	0.92338	0.0281703	0.707219	0.83184	-0.266733	0.999863	0.81194	-0.0338195	0.468895	0.83543	0.328723	0.40441	0.86169	-0.294903
4	K7GM40	26.3262	26.5452	26.6711	26.518	26.2463	26.5946	26.3342	26.2916	26.1268	26.6017	25.8927	26.4108	26.3724	26.3188	26.5749	26.4248	26.3645	26.3318	26.4808	26.5709	26.2603	26.312	26.2937	26.0329	K7GM40	APOA1	K7GM40_PIG	Apolipoprotein A-I	0.127176	0.48069	-0.207271	0.785918	0.92338	-0.0857148	0.3264	0.77082	-0.158454	0.606017	0.81194	0.121556	0.974527	0.85274	-0.0488165	0.854685	0.86169	-0.0727396
5	A0A287B9R5	26.5234	25.1784	27.0736	25.4258	26.5952	26.0081	26.3531	26.2751	26.5147	26.6775	26.3086	26.2533	26.3081	26.0124	26.0984	26.3047	26.2923	26.7347	26.4866	26.2949	26.482	25.407	25.2109	26.0487	A0A287B9R5	SERPINA3-2	A0A287B9R5_PIG	SERPIN domain-containing protein	0.828737	0.85373	0.262954	0.915394	0.92338	0.157675	0.995154	0.83184	-0.145741	0.996787	0.81194	-0.105279	0.73809	0.85274	0.408695	0.813745	0.86169	-0.303416
6	A0A286ZT13	25.8729	26.7599	26.337	26.1774	26.3634	26.7575	26.2834	25.7889	26.1443	25.8634	26.4489	26.1097	26.1814	26.21	25.9233	25.924	25.858	26.1224	26.4078	26.1753	25.8065	25.4653	26.2334	26.0632	A0A286ZT13	ALB	A0A286ZT13_PIG	Serum albumin	0.252654	0.70519	-0.271573	0.117661	0.61789	-0.3415	0.132775	0.44223	-0.352772	0.979662	0.81194	-0.0699267	0.981506	0.85274	0.0811993	1	0.86169	-0.0112726
7	P09571	25.5897	26.1011	26.537	26.0338	26.2015	25.6487	26.3728	25.3797	25.0907	25.9496	26.3336	25.6843	25.7205	26.1198	25.7182	25.5818	24.6821	25.8921	26.2835	26.0164	25.8612	25.1148	25.7812	25.2584	P09571	TF	TRFE_PIG	Serotransferrin	0.581646	0.85373	-0.216866	0.343348	0.92338	-0.399535	0.915308	0.83184	-0.299399	0.982651	0.81194	-0.182669	0.944536	0.85274	0.0825336	0.767841	0.86169	0.100135
8	Q8MJ76	25.5612	25.8631	26.0939	25.4676	25.9383	25.7087	25.7722	25.7093	25.3937	25.9469	25.8414	25.6692	25.6991	25.8657	25.9885	25.7168	25.3326	25.5727	26.1221	25.9566	25.735	25.525	25.3863	25.2745	Q8MJ76	AFP	FETA_PIG	Alpha-fetoprotein	0.908642	0.85373	-0.0500035	0.959496	0.92338	-0.0762465	0.992848	0.83184	-0.105559	0.998107	0.81194	-0.026243	0.983924	0.85274	0.0555551	0.996714	0.86169	-0.0293121
9	P50447	25.6142	25.7251	25.9215	25.7831	25.6295	25.8623	25.4489	25.2337	25.4453	25.6203	25.8343	25.6372	25.7696	25.9284	25.757	25.6202	25.5236	25.6144	26.0596	25.8563	25.7504	25.6758	25.6198	25.4068	P50447	SERPINA1	A1AT_PIG	Alpha-1-antitrypsin	0.0908592	0.36947	-0.219334	0.929737	0.92338	-0.0537351	0.983225	0.83184	-0.0278307	0.320259	0.69135	0.165599	0.230258	0.5655	-0.191503	0.995565	0.86169	0.0259044
10	P02067	25.5495	26.3005	25.922	26.0519	26.0442	25.9611	26.0194	26.3376	25.9812	26.3137	25.5867	25.4467	26.5831	26.1996	26.564	27.6153	26.0944	26.6545	25.9038	25.8433	25.3449	25.8299	25.4224	25.6391	P02067	HBB	HBB_PIG	Hemoglobin subunit beta	0.99932	0.85373	-0.0239762	0.00536868	0.07665	0.646963	0.374423	0.83184	-0.307664	0.00353377	0.02152	0.670939	0.445243	0.81707	0.283688	4.57651e-06	0.00012	-0.954627
11	F1SFI6	25.5339	25.5251	25.2348	25.1045	25.2264	25.327	25.3061	24.8326	24.7909	24.9526	25.4454	25.475	25.0701	25.5169	25.2881	24.4841	24.3599	25.4321	25.0888	25.3331	25.1424	25.2989	25.2285	25.1365	F1SFI6	FETUB	F1SFI6_PIG	Fetuin B	0.563935	0.85373	-0.191518	0.305426	0.92338	-0.300079	0.995182	0.83184	-0.120591	0.970201	0.81194	-0.108562	0.738241	0.85274	-0.0709265	0.443443	0.86169	0.179488
12	F1SFI5	25.1235	24.9107	25.2597	25.0348	25.2665	25.1884	24.7655	24.545	24.501	24.8245	24.4661	25.0507	24.8633	25.0268	25.1948	24.3627	25.1829	25.1061	25.0127	25.1118	24.7128	24.9695	24.9485	24.6182	F1SFI5	HRG	F1SFI5_PIG	Uncharacterized protein	0.000834265	0.00912	-0.438461	0.537604	0.92338	-0.174498	0.33994	0.78942	-0.235012	0.078448	0.26452	0.263963	0.196544	0.52411	-0.20345	0.982822	0.86169	-0.0605133
13	F1RGX4	24.5387	25.3894	24.8745	25.1645	25.1017	25.1839	25.007	25.4418	25.5011	25.2466	24.5755	24.4316	25.8644	25.414	25.6527	26.8764	25.4598	25.8399	24.9756	24.839	24.4139	24.7649	24.4519	24.711	F1RGX4	LOC100737768	F1RGX4_PIG	GLOBIN domain-containing protein	0.999978	0.85373	-0.0081858	0.000780863	0.01542	0.809065	0.280662	0.71653	-0.349412	0.00067299	0.00486	0.817251	0.299662	0.65849	0.341227	6.97139e-08	0	-1.15848
14	A0A287AHK1	24.2785	23.8087	24.1884	24.3457	24.0341	24.0797	24.0151	23.6628	23.798	24.1814	23.4767	24.156	23.6966	24.2396	23.9642	23.9875	24.1708	23.96	23.8486	23.9451	24.1814	24.0945	24.0205	23.8405	A0A287AHK1	GC	A0A287AHK1_PIG	GC vitamin D binding protein	0.122972	0.4688	-0.240852	0.69985	0.92338	-0.119391	0.633543	0.83184	-0.134082	0.689748	0.81194	0.121461	0.781529	0.85274	-0.10677	0.999136	0.86169	-0.0146908
15	A0A287B5W2;P00761	23.3138	23.8753	24.3129	23.7664	23.8263	23.4957	23.9476	24.0937	23.6601	24.319	24.071	23.6035	23.6198	23.6651	23.6263	23.7899	24.1088	23.3704	24.034	23.8082	23.4552	23.7641	23.8809	22.9378	A0A287B5W2;P00761	LOC100302368;	A0A287B5W2_PIG;TRYP_PIG	Trypsinogen isoform X1;Trypsin	0.688197	0.85373	0.184087	0.96071	0.92338	-0.0683604	0.827149	0.83184	-0.118381	0.386462	0.76977	-0.252448	0.21752	0.55152	0.302468	0.980762	0.86169	-0.0500205
16	A0A5G2QIE9;P50390	23.7955	23.579	23.8541	23.5844	23.9293	23.3811	23.8186	23.6013	23.4168	23.5676	23.5781	23.7232	23.4676	23.7488	23.5955	23.6224	23.6867	23.7882	23.4187	23.6898	23.6499	23.9688	23.793	21.7444	A0A5G2QIE9;P50390	TTR	A0A5G2QIE9_PIG;TTHY_PIG	Transthyretin	0.989595	0.85373	-0.0696336	0.999972	0.92338	-0.0356916	0.680319	0.83184	-0.309808	0.993439	0.81194	0.033942	0.848055	0.85274	0.240175	0.690463	0.86169	-0.274117
17	A0A5G2R7M3	23.5415	23.4891	23.7768	23.9461	23.5868	23.6103	23.8714	23.4344	23.8421	23.8993	23.2792	24.0045	23.5957	23.4676	23.6146	23.8905	23.6988	23.3202	24.0347	23.9901	24.0645	24.0341	23.9585	23.9387	A0A5G2R7M3	ITIH4	A0A5G2R7M3_PIG	Inter-alpha-trypsin inhibitor heavy chain H4	0.90216	0.85373	0.0634018	0.855866	0.92338	-0.060538	0.0164247	0.09405	0.345006	0.452362	0.81194	-0.12394	0.103982	0.35362	-0.281604	0.000737718	0.00875	0.405544
18	K7GQ48	23.5188	24.0349	24.0667	24.0529	23.9854	23.9315	23.5579	23.5435	24.0475	23.7603	23.2546	23.7942	23.5519	23.6244	23.6213	23.8383	23.8128	23.6793	23.7008	23.644	23.4833	23.5892	23.712	23.4495	K7GQ48	A2M	K7GQ48_PIG	Alpha-2-macroglobulin	0.0206729	0.12491	-0.272022	0.0286147	0.27376	-0.243689	0.000254538	0.00338	-0.335225	0.99849	0.81194	0.028333	0.641373	0.85274	0.0632037	0.472538	0.86169	-0.0915367
19	A0A5G2RHA4;I3L651	23.351	23.4015	23.9219	23.3276	23.9033	23.0875	24.2673	24.1491	23.4209	23.9631	23.5405	23.4199	23.1392	23.8166	23.7477	23.723	23.6542	23.4978	24.1567	24.0104	24.2759	23.9234	23.6846	23.7812	A0A5G2RHA4;I3L651	FGB	A0A5G2RHA4_PIG;I3L651_PIG	Fibrinogen beta chain	0.360339	0.84937	0.294682	0.780658	0.92338	0.0976268	7.68643e-06	0.00014	0.473237	0.894716	0.81194	-0.197055	0.0146803	0.09678	-0.178556	0.000313084	0.00433	0.375611
20	A0A286ZUY9;A0A287AAD5	23.6685	23.2043	22.4975	23.241	22.4659	23.1355	22.0991	23.2916	23.7068	23.8591	22.167	23.8451	23.3559	23.3944	23.7039	22.8466	23.4622	22.7255	23.4016	23.6358	23.4108	23.5854	23.7282	23.4768	A0A286ZUY9;A0A287AAD5	A1BG	A0A286ZUY9_PIG;A0A287AAD5_PIG	Alpha-1B-glycoprotein	0.767425	0.85373	0.126019	0.854094	0.92338	0.212663	0.510997	0.83184	0.50432	0.997929	0.81194	0.0866439	0.976411	0.85274	-0.378301	0.923415	0.86169	0.291657
21	A0A287AT48	22.8743	22.2722	24.2752	22.292	24.0916	23.1234	23.2515	23.3525	23.5616	23.8317	23.1594	23.2418	23.5282	21.8369	23.6079	23.5955	23.4171	23.906	23.84	23.6692	23.0658	22.7655	22.0206	23.4679	A0A287AT48	SERPINA3-2	A0A287AT48_PIG	SERPIN domain-containing protein	0.998584	0.85373	0.244972	0.972423	0.92338	0.16051	0.992455	0.83184	-0.0166173	0.993497	0.81194	-0.084462	0.99945	0.85274	0.261589	0.999034	0.86169	-0.177127
22	A0A5G2QUU1;F1RX35;I3LJW2	23.0699	23.2423	23.7624	23.2035	23.6353	22.9893	24.0518	23.9681	23.2679	23.9773	23.0741	23.2078	23.0897	23.4726	23.4326	23.6663	23.5187	23.2508	23.7694	23.813	24.0983	23.8669	23.6821	23.8196	A0A5G2QUU1;F1RX35;I3LJW2	FGG	A0A5G2QUU1_PIG;F1RX35_PIG;I3LJW2_PIG	Fibrinogen gamma chain	0.458327	0.85373	0.274073	0.922256	0.92338	0.0880401	0.000492807	0.00535	0.524441	0.836039	0.81194	-0.186033	0.0764126	0.29105	-0.250368	0.00319761	0.03077	0.436401
23	P04366	23.1483	22.7668	23.2625	22.9996	23.1227	23.0055	22.5002	22.7382	22.2106	22.7933	22.2641	22.7396	22.9673	23.4309	23.4603	22.9388	23.3876	23.214	23.1973	22.8967	23.0255	22.8076	23.1361	22.4924	P04366	AMBP	AMBP_PIG	Protein AMBP (Fragment)	3.96979e-05	0.00063	-0.509906	0.299199	0.92338	0.182261	0.931408	0.83184	-0.124955	1.82299e-09	0	0.692167	0.0016126	0.01893	-0.38495	0.0865997	0.36762	-0.307216
24	F1RUM1	22.2119	23.1607	23.4702	22.2733	23.2631	22.1586	23.4125	23.3264	22.1452	23.0198	22.6433	22.7053	22.696	22.7871	23.3007	23.1981	22.1933	23.3007	23.3289	23.3579	22.7413	22.8298	22.2557	21.9366	F1RUM1	AFM	F1RUM1_PIG	Afamin	0.978035	0.85373	0.119109	0.712972	0.92338	0.156365	0.530548	0.83184	-0.0145793	0.486511	0.81194	0.0372558	0.376809	0.75804	0.133688	0.985515	0.86169	-0.170944
25	F1RX36	22.8477	22.9363	23.3957	22.9831	23.3991	22.9558	23.7162	23.7792	23.0771	23.534	23.0576	22.8059	22.8063	23.2623	23.1887	23.3839	23.3981	23.0563	23.6598	23.5338	23.6975	23.4959	23.5001	23.5199	F1RX36	FGA	F1RX36_PIG	Fibrinogen alpha chain	0.48733	0.85373	0.242052	0.851569	0.92338	0.0963251	8.90389e-05	0.00128	0.481556	0.924802	0.81194	-0.145727	0.0304287	0.15998	-0.239504	0.00171918	0.01816	0.385231
26	A0A5G2QUE0	22.9407	22.8242	22.8466	22.7238	22.7834	22.8236	22.9398	22.416	22.7303	22.884	22.4287	22.9918	22.5946	22.9075	22.9294	22.8462	22.7864	22.8973	22.9919	22.8864	22.7559	22.733	22.7516	22.5762	A0A5G2QUE0	SERPINC1	A0A5G2QUE0_PIG	SERPIN domain-containing protein	0.66071	0.85373	-0.0919537	0.992776	0.92338	0.00316739	0.99998	0.83184	-0.0412132	0.491935	0.81194	0.0951211	0.706061	0.85274	-0.0507405	0.989328	0.86169	-0.0443806
27	F1SBS4	22.5691	22.6685	22.7848	22.751	22.6753	22.5644	22.6432	22.3612	22.7923	22.582	22.5937	22.7135	22.5601	22.9026	22.7697	22.8367	22.8157	22.6987	23.1933	22.9522	23.0203	22.7069	23.1418	22.9451	F1SBS4	C3	F1SBS4_PIG	Complement C3	0.871943	0.85373	-0.0545709	0.537766	0.92338	0.0950401	5.0108e-05	0.00081	0.324406	0.154911	0.4451	0.149611	9.35431e-07	3e-05	-0.378977	0.00750091	0.06071	0.229366
28	A0A286ZFW3	22.5693	22.6996	22.5487	21.9756	22.6199	22.0374	22.7375	22.2052	22.1626	22.6982	22.4682	22.4755	22.5405	22.5088	22.5597	22.8236	22.15	22.7571	22.855	22.6652	22.6883	22.7727	22.289	22.3018	A0A286ZFW3	APOH	A0A286ZFW3_PIG	Apolipoprotein H	0.981004	0.85373	0.0494466	0.455311	0.92338	0.14816	0.174178	0.52191	0.186914	0.695792	0.81194	0.0987133	0.344405	0.71814	-0.137467	0.926969	0.86169	0.038754
29	A0A5K1UCV8;F1RG45	22.6163	21.9464	22.7297	22.3019	22.5081	22.5925	22.6141	22.8548	22.6258	23.0663	22.8262	22.7169	22.414	22.9944	22.7672	22.3146	22.5609	22.377	22.6507	22.5964	22.6206	22.8548	22.5255	22.6565	A0A5K1UCV8;F1RG45	AGT	A0A5K1UCV8_PIG;F1RG45_PIG	Angiotensinogen	0.0124409	0.08148	0.334846	0.717774	0.92338	0.1222	0.148896	0.4681	0.201603	0.184294	0.49468	-0.212646	0.849038	0.85274	0.133243	0.671503	0.86169	0.0794031
30	P48819	22.0039	22.0113	22.3238	22.7308	22.4833	22.4462	21.797	22.1852	21.6768	22.3093	21.4834	21.7555	21.9898	22.3195	22.6574	22.3839	22.6206	22.6073	22.3137	22.3764	22.0917	22.5725	22.2388	22.1848	P48819	VTN	VTNC_PIG	Vitronectin	0.00380321	0.03138	-0.465296	0.921631	0.92338	0.0965744	0.97998	0.83184	-0.0368845	0.000349699	0.00264	0.56187	0.0196295	0.12279	-0.428411	0.731374	0.86169	-0.133459
31	P20305	21.9642	22.1771	22.3991	21.9724	22.2593	22.0402	22.3266	21.912	21.8711	22.1581	22.1245	22.2274	22.503	22.7167	22.9563	22.7842	22.5853	22.7433	22.7135	22.4032	22.3884	22.628	22.4322	22.3914	P20305	GSN	GELS_PIG	Gelsolin (Fragment)	0.744714	0.85373	-0.03209	1.12133e-14	0	0.579446	5.25397e-07	1e-05	0.357427	0	0	0.611536	1.53947e-08	0	-0.389517	0.12599	0.49012	-0.22202
32	F1SIB1;Q19AZ8	22.3293	22.0849	22.6112	22.4849	22.2443	22.3961	22.3253	21.8081	22.1768	22.2883	21.988	22.3682	22.0638	22.4484	22.3717	22.3074	22.4073	22.1115	22.2373	22.2351	22.4265	22.3137	22.6285	22.2124	F1SIB1;Q19AZ8	F2	F1SIB1_PIG;THRB_PIG	Prothrombin	0.137679	0.51325	-0.199313	0.771757	0.92338	-0.0734061	0.956313	0.83184	-0.0162066	0.644452	0.81194	0.125907	0.394599	0.77741	-0.183106	0.972093	0.86169	0.0571994
33	A0A5G2QLU1;P27917	21.8064	21.5443	22	21.6764	22.0949	21.6066	21.6644	22.22	21.6798	21.8263	21.6657	22.1417	22.8368	22.9552	22.5761	23.3176	23.3601	22.8301	23.2507	22.6854	22.4168	23.3622	23.1026	22.5627	A0A5G2QLU1;P27917	APOC3	A0A5G2QLU1_PIG;APOC3_PIG	Apolipoprotein C-III	0.957208	0.85373	0.0782071	1.07692e-14	0	1.19123	8.07687e-13	0	1.10863	5.26801e-13	0	1.11302	3.28251e-11	0	-1.03043	0.980018	0.86169	-0.0825956
34	F1SRC8	22.4177	22.3021	22.106	22.5078	22.3584	22.576	22.0126	21.5421	22.2596	22.335	21.9323	22.5755	22.3503	22.2309	22.0727	22.0697	22.0867	22.0691	22.0913	22.2085	22.3958	22.2693	22.1886	22.2524	F1SRC8	CLEC3B	F1SRC8_PIG	C-type lectin domain family 3 member B	0.16974	0.56231	-0.268492	0.068207	0.45537	-0.231456	0.134604	0.44435	-0.143672	0.985869	0.81194	0.0370353	0.998823	0.85274	-0.12482	0.99781	0.86169	0.0877842
35	A0A5S8KLN1;Q29549	21.4994	22.3531	22.342	22.2388	22.337	22.2062	22.071	21.8227	21.9101	21.9688	22.1159	22.1355	22.0321	22.2335	22.454	22.2531	21.9975	22.2887	22.2802	22.1995	21.5934	22.0809	22.1456	21.9112	A0A5S8KLN1;Q29549	CLU	A0A5S8KLN1_PIG;CLUS_PIG	Clusterin	0.0575266	0.26395	-0.158754	0.915621	0.92338	0.0470682	0.854518	0.83184	-0.12762	0.00994362	0.05201	0.205822	0.424812	0.80545	-0.0311332	0.472461	0.86169	-0.174689
36	P18650	22.0825	21.9966	21.7747	21.8904	21.7308	22.4575	21.6694	21.997	21.3529	21.6052	20.8291	21.8351	22.6456	23.1451	22.8979	23.1874	23.2556	23.1135	22.7856	22.4231	22.4865	22.8382	22.5788	22.4347	P18650	APOE	APOE_PIG	Apolipoprotein E	0.0087618	0.06425	-0.440584	2.74225e-14	0	1.0521	2.93583e-05	0.00048	0.60241	0	0	1.49268	2.66454e-14	0	-1.04299	0.0171672	0.11522	-0.449687
37	O02668	22.1589	22.0368	22.3426	22.1533	22.1669	21.4062	21.6419	21.9565	20.9733	21.5748	20.9218	21.8845	21.9255	22.3725	22.64	21.9362	22.4648	22.0353	22.2527	22.2391	22.1309	21.7325	22.4026	21.5681	O02668	ITIH2	ITIH2_PIG	Inter-alpha-trypsin inhibitor heavy chain H2	0.00816063	0.06089	-0.551991	0.553055	0.92338	0.184936	0.94462	0.83184	0.0101956	4.29722e-05	0.00043	0.736926	0.00147852	0.0176	-0.562186	0.878776	0.86169	-0.17474
38	F1S643;K7GLV1	22.1092	22.29	22.1656	21.9294	22.243	21.9508	22.1418	21.8054	22.1131	22.2983	22.0299	22.4047	22.0772	22.0842	22.1587	22.3817	22.1722	22.2121	22.0022	21.9891	22.1168	22.0655	22.1346	22.0214	F1S643;K7GLV1	CFH	F1S643_PIG;K7GLV1_PIG	Uncharacterized protein	0.995543	0.85373	0.0175358	0.787294	0.92338	0.0663768	0.913018	0.83184	-0.059727	0.896549	0.81194	0.048841	0.813608	0.85274	0.0772627	0.375523	0.86169	-0.126104
39	A0A481BCM9	22.027	21.7465	22.3405	22.4079	22.0782	21.9615	22.0156	21.7157	21.7575	22.253	21.7961	21.7822	22.1493	22.184	22.6585	22.2974	22.3001	22.2748	22.333	21.9716	22.1065	21.8066	22.3615	21.9122	A0A481BCM9	APOA2	A0A481BCM9_PIG	Apolipoprotein A-II preproprotein	0.158046	0.55045	-0.206907	0.255367	0.92338	0.2171	0.99763	0.83184	-0.0116721	0.000563398	0.00418	0.424007	0.285232	0.63327	-0.195235	0.185673	0.63864	-0.228772
40	P14460	22.349	21.4847	22.0051	21.3605	21.5896	22.0056	22.8352	22.5974	21.8584	23.0257	21.941	22.3371	22.1612	22.4867	22.0004	22.7962	22.1508	22.0953	21.2769	22.334	23.0017	22.0401	22.8617	22.6114	P14460	FGA	FIBA_PIG	Fibrinogen alpha chain (Fragment)	0.0284977	0.15775	0.633395	0.195259	0.81134	0.482691	0.104118	0.38511	0.555224	0.84788	0.81194	-0.150704	0.97837	0.85274	0.0781712	0.980876	0.86169	0.0725331
41	Q2LE37	21.7397	21.8821	21.8937	21.4358	21.6457	21.5033	21.4938	21.4521	21.4863	21.5741	21.4557	21.6881	21.7757	21.8726	21.9725	22.1551	22.2256	21.8747	21.8421	21.8254	21.737	21.7789	21.7722	21.5892	Q2LE37	APOM	APOM_PIG	Apolipoprotein M	0.158261	0.55045	-0.158371	0.000468361	0.01114	0.295965	0.709225	0.83184	0.0740687	6.68107e-09	0	0.454336	0.0110341	0.07946	-0.23244	0.0237647	0.14596	-0.221896
42	F1SCC9	22.8319	19.7905	22.8469	18.9565	22.4978	21.7179	21.6098	22.4389	21.9204	22.669	22.3528	21.7796	21.487	22.2378	21.4421	21.5528	22.0454	22.4264	21.8112	21.6989	22.7571	19.9864	20.6036	21.3402	F1SCC9	LOC106504545	F1SCC9_PIG	SERPIN domain-containing protein	0.577786	0.85373	0.688176	0.768414	0.92338	0.424992	0.960889	0.83184	-0.0740065	0.98749	0.81194	-0.263184	0.897166	0.85274	0.762183	0.971965	0.86169	-0.498998
43	K7GPT9	21.4956	21.8899	22.0165	21.7075	21.8809	21.5833	22.3069	21.9145	21.9815	22.3792	22.1022	22.1274	21.6647	21.8425	21.745	22.1217	21.5825	22.0023	22.3561	22.2112	22.4542	22.3828	22.0993	21.85	K7GPT9	CFB	K7GPT9_PIG	Complement factor B	0.00261864	0.0234	0.373024	0.907569	0.92338	0.0641522	6.9616e-05	0.00106	0.463302	0.0255484	0.1133	-0.308872	0.76819	0.85274	-0.0902779	0.00080068	0.00937	0.39915
44	A0A5G2QEW1	21.7388	21.9284	22.0343	22.5279	21.9005	22.0812	22.2219	21.8522	22.0869	22.1864	21.9285	22.2906	21.6921	21.6501	21.3315	22.1684	21.6593	21.0182	22.0002	22.4702	22.4737	22.1566	22.5111	22.3923	A0A5G2QEW1	ITIH4	A0A5G2QEW1_PIG	Inter-alpha-trypsin inhibitor heavy chain H4	0.822497	0.85373	0.059256	0.000199598	0.00617	-0.448544	0.513021	0.83184	0.298844	3.95686e-06	5e-05	-0.5078	0.9573	0.85274	-0.239588	6.7753e-07	2e-05	0.747388
45	A0A287AJV9	21.6751	21.6546	21.8963	21.7308	22.0742	21.4443	21.7278	21.489	21.84	21.9234	21.1161	22.3402	21.6612	21.7732	21.7588	21.8282	21.9383	21.6342	21.4333	21.7718	21.8722	22.1734	22.4556	21.8949	A0A287AJV9	CFH	A0A287AJV9_PIG	Uncharacterized protein	0.999975	0.85373	-0.00646676	0.99963	0.92338	0.0197902	0.680201	0.83184	0.187661	0.998976	0.81194	0.026257	0.655195	0.85274	-0.194127	0.725777	0.86169	0.16787
46	A0A287AHT8	21.6665	21.8046	21.9375	21.8098	21.8935	21.8976	21.592	21.4458	21.5548	21.8582	21.4285	21.9136	21.6784	21.8252	21.8817	21.7334	21.833	21.661	21.7553	21.7396	21.6305	21.5814	21.6755	21.5415	A0A287AHT8	KNG1	A0A287AHT8_PIG	Kininogen 1	0.0163271	0.10151	-0.202738	0.765433	0.92338	-0.0661154	0.0474394	0.21437	-0.180957	0.204003	0.52846	0.136623	0.992696	0.85274	-0.0217815	0.336346	0.86169	-0.114841
47	F6Q469	21.1765	22.1676	21.6847	22.6551	21.577	22.0315	21.7466	21.0938	21.4115	21.0806	20.9786	21.8617	22.0499	21.6389	21.2317	21.9219	21.9993	21.4622	21.918	22.4813	21.0042	22.3414	22.4094	22.1414	F6Q469	SERPINA3-2	F6Q469_PIG	SERPIN domain-containing protein	0.0111959	0.07564	-0.51996	0.738445	0.92338	-0.164774	0.999998	0.83184	0.167202	0.161785	0.45839	0.355186	0.0291477	0.1571	-0.687162	0.748721	0.86169	0.331976
48	A0A287A481;A0A5G2QU84;A0A5G2QXR3;F1SB81	21.8327	21.6047	21.8826	21.7504	21.5012	21.4316	21.728	21.1899	21.4173	21.6823	21.3926	22.0455	21.7517	21.9702	21.5935	21.7913	21.7245	21.7433	21.8628	21.5738	21.9372	21.8034	21.7596	21.3731	A0A287A481;A0A5G2QU84;A0A5G2QXR3;F1SB81	PLG	A0A287A481_PIG;A0A5G2QU84_PIG;A0A5G2QXR3_PIG;F1SB81_PIG	Plasminogen	0.840901	0.85373	-0.0912411	0.74654	0.92338	0.0952274	0.882067	0.83184	0.0511353	0.260625	0.62367	0.186469	0.41322	0.79224	-0.142376	0.9945	0.86169	-0.0440921
49	F1RKY2	21.5288	21.3004	21.7921	21.4995	21.4603	21.3997	21.5597	21.0292	21.1705	21.6741	21.0044	21.4997	21.3844	21.9772	21.5547	22.1346	21.8142	21.589	21.4997	21.3367	21.753	21.5532	21.6781	21.0634	F1RKY2	SERPIND1	F1RKY2_PIG	Serpin family D member 1	0.558219	0.85373	-0.173865	0.256239	0.92338	0.245561	0.999546	0.83184	-0.0161052	0.00939947	0.04948	0.419426	0.652886	0.85274	-0.15776	0.208472	0.69171	-0.261666
50	A0A287B3S3	21.3307	21.385	21.5173	21.8741	21.6398	20.8713	21.0055	21.0939	20.2369	20.9819	20.5549	21.196	21.2752	21.6744	21.8865	21.4432	21.7741	21.507	21.722	21.4407	21.5089	21.0024	21.6656	20.769	A0A287B3S3	ITIH1	A0A287B3S3_PIG	Inter-alpha-trypsin inhibitor heavy chain H1	0.00207809	0.01918	-0.591517	0.647863	0.92338	0.157028	0.999943	0.83184	-0.0849055	1.21809e-05	0.00015	0.748546	0.00381093	0.03798	-0.506612	0.612649	0.86169	-0.241934
51	A0A287AL89;A0A5G2QCT3;F1SM61	21.5564	21.5003	21.6022	21.5028	21.6489	21.0037	21.5813	21.4472	21.3293	21.5483	21.5006	21.4911	21.371	21.4603	21.4237	21.1549	21.377	21.2434	20.9801	20.9168	20.954	21.2645	21.0258	20.9372	A0A287AL89;A0A5G2QCT3;F1SM61	FBLN1	A0A287AL89_PIG;A0A5G2QCT3_PIG;F1SM61_PIG	Fibulin-1	0.998108	0.85373	0.0138903	0.431187	0.92338	-0.130687	3.81694e-07	1e-05	-0.455994	0.332516	0.70611	-0.144577	1.07234e-07	0	0.469884	0.00051014	0.00631	-0.325307
52	A0A287BN06	20.9769	22.0821	21.421	21.4373	21.4736	21.9701	21.2817	21.4206	21.4654	21.0243	21.1916	21.132	21.8095	21.3945	21.379	22.0661	21.4067	21.4561	21.8879	22.0779	21.4795	21.485	22.1012	21.9694	A0A287BN06	PZP	A0A287BN06_PIG	Uncharacterized protein	0.104548	0.41202	-0.307563	0.995451	0.92338	0.0251632	0.418497	0.83184	0.273325	0.0637182	0.22804	0.332726	0.00309383	0.03268	-0.580888	0.541406	0.86169	0.248162
53	A0A5K1UE53;F1SJW8	21.3313	21.4171	21.4697	21.6235	21.4058	21.5565	21.4134	20.9779	21.5314	21.2416	21.3036	21.3007	21.1692	21.4962	21.5988	20.9876	21.5636	21.4554	21.6188	21.6166	21.3678	21.2852	21.5802	21.2759	A0A5K1UE53;F1SJW8	SERPING1	A0A5K1UE53_PIG;F1SJW8_PIG	Serpin family G member 1;Plasma protease C1 inhibitor	0.275728	0.74629	-0.172554	0.780568	0.92338	-0.088854	0.998685	0.83184	-0.00991497	0.837409	0.81194	0.0836995	0.387027	0.76778	-0.162639	0.860531	0.86169	0.078939
54	A0A5G2QAT5;F1SMF4	19.8808	21.7439	21.6465	20.9718	21.402	21.4168	21.5239	20.8498	21.1901	21.0099	21.5998	20.8616	21.7271	21.5571	21.3451	21.2132	20.9899	20.6887	21.5866	21.4979	21.235	20.6958	20.9155	20.3241	A0A5G2QAT5;F1SMF4	ITGA2	A0A5G2QAT5_PIG;F1SMF4_PIG	Integrin subunit alpha 2	0.999998	0.85373	-0.00446905	0.995574	0.92338	0.0765361	0.922675	0.83184	-0.134503	0.994532	0.81194	0.0810051	0.928175	0.85274	0.130034	0.817009	0.86169	-0.211039
55	F1SQ09	21.1647	21.1911	20.7837	21.5012	21.2207	21.3888	20.9893	21.2945	21.3655	21.2296	21.3066	21.3331	21.1561	20.8749	21.2348	20.7095	21.2801	21.0367	20.9263	21.073	21.0758	21.0249	21.1943	20.8855	F1SQ09	LUM	F1SQ09_PIG	Lumican	0.966112	0.85373	0.044706	0.264485	0.92338	-0.159707	0.14545	0.46234	-0.178422	0.102003	0.3179	-0.204413	0.0487846	0.21592	0.223128	0.984653	0.86169	-0.0187157
56	A0A286ZY95	21.6451	20.9822	20.7708	20.9748	21.3177	20.5336	21.0741	21.309	21.4754	21.0299	21.5257	20.3458	20.3775	20.7645	19.9358	20.4694	20.8707	20.7603	20.5879	20.5962	20.3876	20.8227	20.6387	21.0379	A0A286ZY95	FN1	A0A286ZY95_PIG	Fibronectin 1	0.963959	0.85373	0.0892626	0.0456328	0.35586	-0.507681	0.336219	0.78698	-0.35888	0.0115513	0.05928	-0.596944	0.140696	0.42427	0.448142	0.812208	0.86169	0.148801
57	F1RXM6	21.2684	21.1128	20.9845	21.3279	20.9019	21.2938	20.7268	20.7257	21.2414	21.0014	20.8742	21.2808	20.9923	21.0474	21.0148	20.9212	20.9472	20.7398	20.9057	20.735	21.1134	21.1906	21.0882	21.2261	F1RXM6	SERPINA7	F1RXM6_PIG	Thyroxine-binding globulin	0.622029	0.85373	-0.173172	0.00966365	0.12455	-0.204434	0.0203322	0.10827	-0.105072	0.266876	0.6294	-0.0312618	0.401601	0.78207	-0.0681005	0.999737	0.86169	0.0993623
58	A0A287A3C2;A0A287BIP4	21.0633	20.7389	21.0848	21.3201	20.6314	20.6789	20.7036	20.3657	20.8192	21.1381	20.7435	21.0042	21.1533	21.0565	20.5466	20.8355	20.8199	20.7932	20.676	20.838	21.3983	20.9015	21.2587	21.3065	A0A287A3C2;A0A287BIP4	F12	A0A287A3C2_PIG;A0A287BIP4_PIG	Coagulation factor XII	0.933084	0.85373	-0.123862	0.895219	0.92338	-0.0521057	0.975152	0.83184	0.143551	0.999708	0.81194	0.0717567	0.784971	0.85274	-0.267413	0.680409	0.86169	0.195656
59	A0A287AG13	20.8603	20.7758	20.9648	21.0827	21.178	21.3653	20.6748	20.6505	20.4074	21.0572	20.3224	20.9979	21.076	20.9253	21.2709	21.6542	21.434	21.0724	21.1595	21.0426	20.9356	21.4183	21.25	21.0066	A0A287AG13	APOB	A0A287AG13_PIG	Apolipoprotein B	0.027963	0.15681	-0.352775	0.468299	0.92338	0.200985	0.957667	0.83184	0.0976217	0.000122994	0.0011	0.55376	0.0075695	0.0636	-0.450397	0.78785	0.86169	-0.103363
60	Q68RU1	20.4124	21.0475	21.016	21.0764	20.9289	21.1303	20.8964	20.5677	20.3019	20.6992	20.1715	20.8431	19.4305	21.0719	21.1866	20.4365	20.8944	20.6444	20.5066	20.4191	20.5931	20.3886	21.0961	20.3811	Q68RU1	ApoN	Q68RU1_PIG	Ovarian and testicular apolipoprotein N	0.321867	0.82104	-0.355284	0.465915	0.92338	-0.324568	0.408442	0.83184	-0.371168	0.995361	0.81194	0.0307159	0.999616	0.85274	0.0158839	0.999189	0.86169	-0.0465998
61	A0A287AJI4;A0A287B9B3;A0A5G2QN21;A0A5G2QSG7;A0A5G2RFF8	20.8723	20.8348	21.1009	20.7815	20.8616	20.7181	20.6877	20.6891	21.0475	21.1102	20.8006	20.744	20.8097	20.885	20.965	21.0498	21.103	20.694	20.806	20.9996	20.9316	21.1758	21.0487	20.8242	A0A287AJI4;A0A287B9B3;A0A5G2QN21;A0A5G2QSG7;A0A5G2RFF8	SERPINF2	A0A287AJI4_PIG;A0A287B9B3_PIG;A0A5G2QN21_PIG;A0A5G2QSG7_PIG;A0A5G2RFF8_PIG	Serpin family F member 2;Alpha-2-antiplasmin isoform X2;Serpin family F member 2;Serpin family F member 2;Serpin family F member 2	0.996203	0.85373	-0.0150296	0.97502	0.92338	0.0562444	0.90341	0.83184	0.102808	0.919251	0.81194	0.0712741	0.806122	0.85274	-0.117838	0.992402	0.86169	0.0465635
62	F1SH94	20.339	19.6776	21.3965	19.9144	21.2332	20.9898	20.1835	20.6069	20.14	20.9062	20.2397	20.5626	21.3352	20.9844	21.6055	20.6388	21.4844	21.2203	20.77	20.006	20.798	20.974	20.9708	19.8752	F1SH94	ITIH3	F1SH94_PIG	Inter-alpha-trypsin inhibitor heavy chain 3	0.795458	0.85373	-0.151943	0.0706924	0.46859	0.619659	0.999791	0.83184	-0.0260868	0.00537494	0.03051	0.771602	0.788771	0.85274	-0.125856	0.0971728	0.39882	-0.645746
63	A0A140TAK8	21.2481	21.0984	20.8021	20.0215	20.8779	19.8803	20.575	20.3399	20.4154	20.8824	20.4593	20.4119	21.3002	21.2024	20.5983	20.8576	20.5768	20.462	21.5508	20.7338	21.6668	21.1198	20.2258	20.7633	A0A140TAK8	APOH	A0A140TAK8_PIG	Apolipoprotein H	0.917377	0.85373	-0.140729	0.724566	0.92338	0.178165	0.176126	0.52586	0.355325	0.333153	0.70611	0.318894	0.0393181	0.19037	-0.496054	0.727284	0.86169	0.17716
64	A0A5G2QTC8;F1RF27;F1RF28;I3L8H4	21.1954	20.8677	20.6291	20.7359	20.5515	20.766	20.5664	20.219	20.7059	19.8717	21.0307	20.3151	20.8379	20.7644	20.4813	20.1558	20.4318	20.8217	20.6139	20.2782	20.2616	20.1821	20.4055	20.5324	A0A5G2QTC8;F1RF27;F1RF28;I3L8H4	THBS4	A0A5G2QTC8_PIG;F1RF27_PIG;F1RF28_PIG;I3L8H4_PIG	Thrombospondin 4	0.0882819	0.36069	-0.339477	0.570943	0.92338	-0.208793	0.0633352	0.26212	-0.412003	0.727433	0.81194	0.130684	0.996867	0.85274	0.0725253	0.595407	0.86169	-0.203209
65	F1RK01	20.4129	20.6619	21.153	20.8839	20.8649	20.8713	20.7695	20.3185	20.4403	21.0558	19.9973	21.0695	20.3466	20.7116	20.675	20.9612	20.8886	20.6397	21.0535	20.9845	20.8899	20.9175	20.7123	20.4563	F1RK01	CPB2	F1RK01_PIG	Carboxypeptidase B2	0.565121	0.85373	-0.199519	0.908496	0.92338	-0.104205	0.997991	0.83184	0.0276889	0.92689	0.81194	0.0953132	0.477478	0.84346	-0.227208	0.829334	0.86169	0.131894
66	A0A5G2RAY1;I3LBF1;Q29545	21.0854	20.6363	20.8488	20.4762	20.6893	20.554	20.7616	20.2295	20.3052	20.5298	20.7809	20.8842	20.6319	21.1747	20.5783	20.3258	20.2792	20.7	20.552	20.6707	20.8546	20.3555	20.2794	20.4321	A0A5G2RAY1;I3LBF1;Q29545	TF;TF;ICA	A0A5G2RAY1_PIG;I3LBF1_PIG;ICA_PIG	Serotransferrin;Serotransferrin;Inhibitor of carbonic anhydrase	0.761412	0.85373	-0.133137	0.856528	0.92338	-0.100024	0.691445	0.83184	-0.190943	0.996913	0.81194	0.0331126	0.999278	0.85274	0.0578061	0.985509	0.86169	-0.0909187
67	A0A287BQR3;A0A5K1UZA2	21.3927	21.0013	20.7706	20.5207	21.0041	21.2826	20.644	21.086	21.3526	20.0073	20.4254	20.787	20.6084	20.8519	20.2845	20.3959	21.4403	20.6473	20.5594	20.5904	20.7919	20.4754	20.3282	21.1723	A0A287BQR3;A0A5K1UZA2	FCN2	A0A287BQR3_PIG;A0A5K1UZA2_PIG	Ficolin-2	0.583347	0.85373	-0.278295	0.526629	0.92338	-0.290609	0.379527	0.83184	-0.342405	0.999781	0.81194	-0.0123142	0.98431	0.85274	0.0641105	0.991442	0.86169	-0.0517963
68	F1SCC7	20.6341	20.4938	20.6618	20.5395	20.2238	21.1501	21.9668	21.7451	21.971	22.4455	21.8747	22.1759	20.7206	20.8835	19.7971	21.122	20.4341	20.2626	22.1982	22.341	22.6927	22.3293	21.9582	22.1525	F1SCC7	LOC396684	F1SCC7_PIG	SERPIN domain-containing protein	0	0	1.41265	0.898428	0.92338	-0.0805417	0	0	1.66147	0	0	-1.49319	0.998809	0.85274	-0.248825	0	0	1.74202
69	A0A5G2QCL1	20.5642	20.5781	20.6627	20.853	20.5732	20.757	20.4105	20.255	20.8241	20.6105	20.7444	20.5272	20.4658	20.5378	20.3617	20.3258	20.4203	20.5912	20.4426	20.2398	20.5386	20.3158	20.6025	20.5043	A0A5G2QCL1	C4A	A0A5G2QCL1_PIG	Uncharacterized protein	0.494499	0.85373	-0.102743	0.00894954	0.11697	-0.214246	0.00316163	0.02517	-0.224088	0.296372	0.66992	-0.111502	0.161042	0.457	0.121344	0.982545	0.86169	-0.00984184
70	A0A5G2R7T8;A0A5G2R920;A0A5G2RJ15	20.2325	20.3207	20.4965	20.2712	20.4807	20.168	20.2725	19.8802	19.8827	20.6205	19.8306	20.4231	20.1048	20.4151	20.3901	20.4692	20.0755	20.2444	20.1	20.0393	20.4818	20.4921	20.1941	19.9344	A0A5G2R7T8;A0A5G2R920;A0A5G2RJ15	PROS1	A0A5G2R7T8_PIG;A0A5G2R920_PIG;A0A5G2RJ15_PIG	Protein S	0.461357	0.85373	-0.176646	0.987771	0.92338	-0.0450808	0.809248	0.83184	-0.121314	0.676709	0.81194	0.131565	0.953242	0.85274	-0.0553315	0.936915	0.86169	-0.0762334
71	A0A287AYJ8;Q0PM28	20.6913	20.1081	20.4697	20.2476	20.4612	19.9675	20.269	20.1061	19.9786	20.6009	20.3896	20.7209	20.2584	20.5228	20.3363	20.3004	20.1037	20.375	19.9259	20.3248	20.7362	20.2461	19.7956	19.855	A0A287AYJ8;Q0PM28	SERPINF1	A0A287AYJ8_PIG;Q0PM28_PIG	Serpin family F member 1;Pigment epithelium-derived factor	0.992601	0.85373	0.019944	0.999748	0.92338	-0.00814648	0.733554	0.83184	-0.176986	0.984044	0.81194	-0.0280905	0.631476	0.85274	0.196931	0.771801	0.86169	-0.16884
72	A0A287BGD6	20.0445	19.7522	20.5863	20.0648	20.0938	20.1251	20.7922	20.1727	20.5075	20.509	20.2377	20.5858	19.9433	20.2312	20.5236	20.0629	20.467	20.1052	20.7022	20.4055	21.0385	20.9947	20.4754	20.1382	A0A287BGD6	ITIH4	A0A287BGD6_PIG	Inter-alpha-trypsin inhibitor heavy chain H4	0.0636531	0.28298	0.356357	0.899872	0.92338	0.11106	0.00473569	0.03547	0.514639	0.291383	0.66447	-0.245297	0.791987	0.85274	-0.158282	0.0343496	0.18722	0.403579
73	F1SCF1;Q9GK37	20.1415	19.3341	21.0784	20.1526	20.1701	19.8804	20.5871	19.407	20.3452	20.3981	19.2745	20.1749	19.9958	20.9633	19.8508	20.1671	20.0141	20.4329	20.0179	20.584	20.1777	20.3085	20.5846	20.0721	F1SCF1;Q9GK37	SERPINA6;Serpina6	F1SCF1_PIG;CBG_PIG	Serpin family A member 6;Corticosteroid-binding globulin	0.97973	0.85373	-0.0950541	0.96921	0.92338	0.111129	0.914216	0.83184	0.164608	0.835349	0.81194	0.206183	0.730177	0.85274	-0.259662	0.996392	0.86169	0.0534795
74	F1S4I1	20.6031	20.4222	20.307	20.2939	20.1005	20.5866	20.2498	20.1419	20.4583	20.3496	20.19	20.5118	20.3658	20.3685	20.1523	20.272	20.3619	20.1942	20.1063	20.0594	20.1087	20.0664	20.2121	20.1039	F1S4I1	GOLM1	F1S4I1_PIG	Golgi membrane protein 1	0.998507	0.85373	-0.0686349	0.119568	0.61988	-0.0997291	3.94529e-12	0	-0.276049	0.103286	0.31925	-0.0310942	1.0504e-10	0	0.207414	1.29927e-06	4e-05	-0.17632
75	A0A287AQ20	20.0368	20.2372	20.5771	19.8384	20.3185	19.5809	20.0657	20.0268	19.8731	19.9771	19.8264	20.3733	20.1682	19.9553	20.2531	20.5919	20.1282	20.1816	20.2676	20.3005	20.1138	20.1806	19.9562	20.0612	A0A287AQ20	CFI	A0A287AQ20_PIG	Complement factor I isoform 1 preproprotein	0.929336	0.85373	-0.074427	0.708114	0.92338	0.114906	0.914642	0.83184	0.0485054	0.337764	0.71035	0.189333	0.599588	0.85274	-0.122932	0.978101	0.86169	-0.0664002
76	F1RQ75	20.218	19.5933	19.8529	19.4851	19.8708	19.975	19.7824	19.8874	19.4961	20.1393	19.3139	20.3013	19.7968	20.0294	20.2735	20.2028	20.2724	20.0166	20.0432	20.1962	20.4728	20.0426	19.9899	20.2445	F1RQ75	F9	F1RQ75_PIG	Coagulation factor IX	0.999732	0.85373	-0.0124383	0.178635	0.77464	0.266056	0.0533693	0.23238	0.332342	0.148196	0.42882	0.278494	0.0418462	0.19705	-0.34478	0.938484	0.86169	0.0662859
77	F1SCF0	17.0046	20.0004	20.7952	15.4139	20.6515	20.8584	15.7839	15.2215	20.3526	15.6204	15.624	20.4184	21.4489	15.0539	15.054	20.6818	20.611	20.0317	21.8792	21.7085	16.6652	20.451	15.5734	21.546	F1SCF0	SERPINA1	F1SCF0_PIG	Alpha-1-antitrypsin	0.43338	0.85373	-1.95052	0.998685	0.92338	-0.307119	0.999735	0.83184	0.516566	0.534492	0.81194	1.64341	0.470517	0.83658	-2.46709	0.995001	0.86169	0.823685
78	F1RZN7	20.0863	20.0453	20.5548	20.2484	20.2511	20.047	20.1191	19.6984	20.0324	19.9574	19.7151	20.177	19.7807	20.3893	20.4464	20.0699	20.1442	19.9854	20.3498	20.2369	20.0648	19.8968	20.0627	20.0338	F1RZN7	KLKB1	F1RZN7_PIG	Uncharacterized protein	0.080054	0.33506	-0.255572	0.941853	0.92338	-0.0695034	0.882142	0.83184	-0.0980008	0.273648	0.63852	0.186068	0.393091	0.77622	-0.157571	0.997667	0.86169	-0.0284975
79	A0A5G2QSF4;A0A5G2R164;A0A5G2RIA8;A0A5G2RJM5	20.2226	19.5833	20.3833	19.7595	20.1139	20.3693	19.9008	19.4756	18.8237	20.0806	19.2925	19.41	19.9945	20.2081	20.3149	20.4689	20.3835	20.0366	19.7104	20.222	20.2665	19.73	20.39	19.5418	A0A5G2QSF4;A0A5G2R164;A0A5G2RIA8;A0A5G2RJM5	PROC	A0A5G2QSF4_PIG;A0A5G2R164_PIG;A0A5G2RIA8_PIG;A0A5G2RJM5_PIG	Vitamin K-dependent protein C	0.00275748	0.02439	-0.574773	0.846039	0.92338	0.16241	0.963464	0.83184	-0.0952244	8.65011e-05	0.00078	0.737183	0.0270259	0.15138	-0.479549	0.566863	0.86169	-0.257634
80	F1RHM8	21.5156	18.5968	14.2878	17.3733	15.1207	19.5324	21.6774	18.6437	20.5335	21.5087	16.7131	19.4293	18.7677	20.1061	21.7857	19.0221	17.7517	20.4472	17.1185	16.2252	21.3145	17.6871	17.8464	17.4745	F1RHM8	RANBP1	F1RHM8_PIG	RAN binding protein 1	0.0955232	0.38299	2.01321	0.188286	0.7976	1.90901	0.994731	0.83184	0.206599	0.985531	0.81194	-0.1042	0.235214	0.57267	1.80661	0.324106	0.86169	-1.70241
81	A0A287AHI7;A0A287ASX3;Q6PP07	19.7711	20.761	20.7849	20.7487	20.1256	20.9591	20.4822	19.9704	19.7042	19.8815	20.4709	20.0312	20.123	20.2177	19.4351	19.9066	20.5005	19.4872	20.4857	20.113	20.1726	20.1228	19.9719	19.7151	A0A287AHI7;A0A287ASX3;Q6PP07	ADIPOQ	A0A287AHI7_PIG;A0A287ASX3_PIG;Q6PP07_PIG	C1q domain-containing protein;C1q domain-containing protein;Adiponectin	0.116701	0.45308	-0.435039	0.0135501	0.16006	-0.580054	0.102373	0.38376	-0.428213	0.846304	0.81194	-0.145015	0.999284	0.85274	-0.00682621	0.901608	0.86169	0.151841
82	A0A5G2QZJ2;A0A5G2R5B2;F1ST89	19.8287	20.1246	20.2735	20.444	20.3053	20.2663	19.9231	19.8361	20.022	20.1139	20.0207	20.2135	20.0057	20.2272	20.1354	20.2671	20.1706	19.7751	17.0172	20.3175	16.2564	20.39	19.1904	20.2538	A0A5G2QZJ2;A0A5G2R5B2;F1ST89	RECK	A0A5G2QZJ2_PIG;A0A5G2R5B2_PIG;F1ST89_PIG	Reversion inducing cysteine rich protein with kazal motifs	0.979166	0.85373	-0.185533	0.97756	0.92338	-0.110196	0.0132899	0.07993	-1.30285	0.999999	0.81194	0.0753369	0.0412085	0.19511	1.11731	0.0363108	0.19411	-1.19265
83	Q9TUQ3	19.984	20.3565	20.2204	20.4536	20.1756	20.2115	20.1686	19.7301	20.301	20.3072	19.6327	20.1726	20.1658	20.279	20.1102	20.1874	20.3753	20.1143	20.0956	20.0115	19.9266	19.9102	20.1178	19.864	Q9TUQ3	C7	CO7_PIG	Complement component C7	0.297092	0.77714	-0.181577	0.986846	0.92338	-0.0282887	0.0166986	0.09497	-0.246	0.494652	0.81194	0.153289	0.626252	0.85274	0.0644224	0.0361675	0.19411	-0.217711
84	A0A287AGS7;O02840;Q8WNW5	20.0579	20.0353	19.9596	19.7776	19.6955	20.3125	19.9214	19.8045	20.2481	20.0652	19.8201	19.6044	19.9615	19.9753	19.8937	19.4299	20.135	19.8898	19.7422	20.0623	19.7383	19.7733	19.9927	19.9049	A0A287AGS7;O02840;Q8WNW5	CDH5	A0A287AGS7_PIG;CADH5_PIG;Q8WNW5_PIG	Cadherin-5	0.935724	0.85373	-0.0624838	0.732875	0.92338	-0.092215	0.577754	0.83184	-0.104143	0.970624	0.81194	-0.0297312	0.894426	0.85274	0.0416592	0.992452	0.86169	-0.011928
85	F1S682	19.805	20.0457	19.9342	19.8889	20.042	20.1242	19.9074	19.7388	19.7234	19.9566	19.4813	20.0649	19.7202	19.9644	19.8644	19.8313	19.7696	20.0376	20.0947	19.6409	19.697	20.0672	19.9348	19.5771	F1S682	QSOX1	F1S682_PIG	Sulfhydryl oxidase	0.208437	0.63591	-0.161251	0.74879	0.92338	-0.108726	0.733722	0.83184	-0.138049	0.788493	0.81194	0.0525251	0.825286	0.85274	-0.0232024	0.999955	0.86169	-0.0293227
86	A0A5G2Q7R0;A0A5G2QW87	20.3344	20.0315	19.9742	20.2691	19.6941	20.0238	20.0417	19.533	19.9317	19.2666	20.2573	19.748	19.583	19.6027	20.0597	19.0458	20.001	19.5859	19.3521	19.412	19.6208	19.1651	19.7152	19.67	A0A5G2Q7R0;A0A5G2QW87	COL6A1	A0A5G2Q7R0_PIG;A0A5G2QW87_PIG	Collagen type VI alpha 1 chain	0.352686	0.84811	-0.258119	0.0387979	0.32584	-0.408154	0.0014957	0.01418	-0.5653	0.729935	0.81194	-0.150035	0.165557	0.46519	0.307181	0.702886	0.86169	-0.157147
87	F1RS37	21.4438	21.3743	19.4928	20.7693	20.0729	20.4918	19.4708	19.0392	19.1078	19.5459	20.5875	19.4539	19.7032	20.644	19.7008	19.6849	20.382	21.1056	19.6823	19.0358	18.801	18.6959	18.2673	19.1288	F1RS37	POSTN	F1RS37_PIG	Periostin	0.00128437	0.01281	-1.07326	0.690128	0.92338	-0.404029	2.44341e-06	6e-05	-1.67227	0.0516191	0.19411	0.669236	0.466811	0.83484	0.59901	0.000315228	0.00433	-1.26825
88	A0A286ZKB4;A0A287AIM8	19.596	19.7656	19.8485	19.7502	19.7905	20.0097	19.8102	19.5717	19.839	19.9938	19.8281	19.8602	19.8949	20.0905	19.8042	19.9761	20.0827	19.6305	20.1816	20.3056	20.2953	20.158	20.3658	19.9572	A0A286ZKB4;A0A287AIM8	C5	A0A286ZKB4_PIG;A0A287AIM8_PIG	Complement C5a anaphylatoxin	0.988294	0.85373	0.0237052	0.517159	0.92338	0.119733	2.48623e-06	6e-05	0.417159	0.719508	0.81194	0.0960273	1.16854e-05	0.00028	-0.393454	0.000894104	0.01032	0.297427
89	F1S8N1	19.492	19.615	19.7396	19.5006	19.4764	19.3514	19.8105	19.2351	19.8329	19.958	19.4024	19.8856	19.6026	19.6345	19.8535	19.9355	19.4847	19.4865	19.9903	19.7186	19.7959	20.1266	20.0906	19.86	F1S8N1	HGFAC	F1S8N1_PIG	HGF activator	0.448094	0.85373	0.158255	0.634767	0.92338	0.137021	0.00282335	0.02314	0.401164	0.99208	0.81194	-0.0212339	0.174222	0.482	-0.24291	0.0830025	0.3611	0.264144
90	A0A287BAB3	19.4493	20.8425	18.9416	19.4798	19.041	19.7511	19.9405	18.3348	19.4824	19.2379	18.4739	19.8171	21.0008	20.0383	19.5246	20.1614	20.1352	17.8045	19.7613	20.053	20.2195	19.4354	19.7219	19.5794	A0A287BAB3	NA	A0A287BAB3_PIG	Ig-like domain-containing protein	0.990048	0.85373	-0.369809	0.938843	0.92338	0.193236	0.990892	0.83184	0.210834	0.824973	0.81194	0.563045	1	0.85274	-0.580643	0.823842	0.86169	0.0175979
91	A0A287A1S6;A0A287BLD2;A0A5G2QQE9	19.9652	20.3157	19.3152	20.4432	19.5755	20.0729	19.2656	19.696	19.8276	19.5324	20.0668	19.4119	19.284	19.1532	18.9231	19.1803	18.9675	19.4486	18.6021	18.2742	19.1308	18.4242	18.365	18.6217	A0A287A1S6;A0A287BLD2;A0A5G2QQE9	COL1A1	A0A287A1S6_PIG;A0A287BLD2_PIG;A0A5G2QQE9_PIG	Collagen alpha-1(I) chain preproprotein;Collagen type I alpha 1 chain;Collagen type I alpha 1 chain	0.236011	0.69112	-0.314567	1.26701e-05	0.00069	-0.788516	1.33227e-15	0	-1.37829	0.022555	0.10273	-0.473948	1.23398e-09	0	1.06372	0.00222802	0.0227	-0.589771
92	A0A480P2B4	19.3621	19.2464	19.719	19.3035	19.7049	19.2363	19.3268	19.0236	18.7795	19.4847	18.984	19.5679	19.8008	19.7261	20.0409	20.0836	20.1799	20.0493	19.9113	19.7283	19.4471	19.92	19.5255	19.2717	A0A480P2B4	SERPINA5	A0A480P2B4_PIG	Plasma serine protease inhibitor preproprotein	0.265888	0.73119	-0.234279	7.52742e-05	0.00279	0.551414	0.291654	0.73441	0.205293	6.05676e-09	0	0.785693	0.00228839	0.02514	-0.439572	0.0527215	0.26391	-0.346121
93	A0A287BHL7;I3LC64	19.4884	19.9596	19.7985	19.8922	19.5783	19.7506	19.8305	19.2683	19.5699	19.7323	19.7496	19.7721	19.6084	19.6034	19.7591	19.7195	19.7599	19.8381	19.7522	19.4491	19.6566	19.7183	19.4128	19.2968	A0A287BHL7;I3LC64	ECM1	A0A287BHL7_PIG;I3LC64_PIG	Extracellular matrix protein 1	0.750309	0.85373	-0.0908161	0.98475	0.92338	-0.0298661	0.136094	0.44618	-0.19696	0.920369	0.81194	0.06095	0.635123	0.85274	0.106144	0.249603	0.75844	-0.167094
94	A0A287A3Z4;F1SC80;P27485	19.3014	18.9941	19.811	18.6017	19.749	17.9014	19.4732	19.4377	18.4652	19.1046	19.2684	18.9755	18.8465	19.5874	19.8615	19.5088	19.3706	19.8559	19.6277	19.9528	19.5322	19.7027	19.3232	18.6746	A0A287A3Z4;F1SC80;P27485	RBP4	A0A287A3Z4_PIG;F1SC80_PIG;RET4_PIG	Retinol-binding protein 4;Retinol-binding protein;Retinol-binding protein 4	0.931059	0.85373	0.0609922	0.0388232	0.32584	0.445341	0.00117433	0.01182	0.409095	0.00848185	0.04524	0.384349	0.00041562	0.0066	-0.348103	0.630598	0.86169	-0.0362464
95	A0A5G2R0K3;F1RN41	19.3642	18.4559	19.765	19.298	19.2838	19.5233	19.4248	19.1705	19.0452	19.591	18.5421	19.5054	18.8859	19.9067	19.4842	19.8703	19.9384	19.558	19.4648	19.2771	20.0556	20.1168	19.6912	19.6017	A0A5G2R0K3;F1RN41	F10	A0A5G2R0K3_PIG;F1RN41_PIG	Uncharacterized protein	0.987404	0.85373	-0.0685241	0.423781	0.92338	0.325548	0.233102	0.64042	0.419482	0.249124	0.61047	0.394072	0.120654	0.38582	-0.488006	0.976745	0.86169	0.0939337
96	P24853	19.5176	18.0953	17.77	18.4785	17.9263	18.7298	18.286	18.4979	18.5501	18.4844	18.5336	19.1424	19.4493	19.8528	18.997	19.5036	20.0175	19.5679	18.281	18.5361	19.4553	20.0664	19.0015	19.4596	P24853	IGFBP2	IBP2_PIG	Insulin-like growth factor-binding protein 2	0.450168	0.85373	0.162827	3.88054e-06	0.00025	1.1451	0.0897508	0.34577	0.713742	0.006623	0.03627	0.982268	0.845204	0.85274	-0.550914	0.0840391	0.3611	-0.431354
97	A0A5G2QFE3;F1SS24	19.5626	19.5112	19.4246	19.2375	19.9081	18.7347	18.5706	20.2051	19.7243	19.463	20.0679	18.1688	18.8568	18.6312	18.3859	18.6068	18.9173	18.9514	18.5267	19.1428	18.407	19.62	18.9138	19.5079	A0A5G2QFE3;F1SS24	FN1	A0A5G2QFE3_PIG;F1SS24_PIG	Fibronectin 1	0.999557	0.85373	-0.0298169	0.0628296	0.4358	-0.67156	0.450934	0.83184	-0.376753	0.081754	0.27229	-0.641743	0.515862	0.85274	0.346936	0.766586	0.86169	0.294807
98	F6PSJ3	19.2161	18.101	19.0846	18.9408	19.4116	18.6837	17.9019	19.3269	17.753	18.4789	18.4366	18.5526	20.0459	19.9013	19.9773	20.4218	20.5827	20.2233	19.6615	19.7261	19.1126	20.4226	20.2858	19.9317	F6PSJ3	APOC2	F6PSJ3_PIG	Uncharacterized protein	0.158464	0.55045	-0.497993	5.23378e-07	4e-05	1.28577	0.000632633	0.00668	0.950438	2.76112e-13	0	1.78376	3.06147e-08	0	-1.44843	0.513861	0.86169	-0.335331
99	F1SAT8	19.4908	19.4525	18.9478	19.7816	19.2296	19.6083	19.483	19.48	19.4578	19.2855	19.4407	19.132	18.9607	19.344	19.3443	18.9772	19.3493	19.4275	19.0665	19.4631	19.1125	19.2934	19.362	19.3534	F1SAT8	CD93	F1SAT8_PIG	CD93 molecule	0.985073	0.85373	-0.0385966	0.335324	0.92338	-0.184586	0.573491	0.83184	-0.143262	0.544309	0.81194	-0.145989	0.781893	0.85274	0.104665	0.98346	0.86169	0.041324
100	A0A5S6HM44;Q8SPS7	19.7719	17.6183	18.6835	18.4046	18.3115	20.1801	20.8623	22.1451	21.6702	22.1871	20.2716	21.5354	21.2338	19.5738	19.7373	21.3209	20.4315	20.0251	22.3094	21.9958	22.6981	22.5007	22.2207	22.1373	A0A5S6HM44;Q8SPS7	HP	A0A5S6HM44_PIG;HPT_PIG	Haptoglobin	4.92939e-12	0	2.61694	0.00033413	0.0094	1.55873	0	0	3.48199	0.0155845	0.07525	-1.05821	0.204882	0.53046	-0.86505	4.47779e-06	0.00012	1.92326
101	A0A5G2R5W3;K7GKY0	19.2573	19.7604	19.4353	19.2688	19.367	19.326	19.4454	19.4723	19.4576	19.5597	19.2746	19.3983	19.3348	19.4581	19.3355	19.2487	19.4131	19.438	19.362	19.093	19.1641	19.2059	18.6911	18.9248	A0A5G2R5W3;K7GKY0	CD109	A0A5G2R5W3_PIG;K7GKY0_PIG	CD109 molecule;CD109 antigen isoform 1 preproprotein	0.977377	0.85373	0.0321685	0.999126	0.92338	-0.0311266	0.00253038	0.02137	-0.328995	0.949837	0.81194	-0.0632952	0.000446433	0.00696	0.361164	0.00285513	0.0281	-0.297868
102	F1SL22	19.5997	18.9744	18.7017	19.1089	18.7349	18.4778	19.5306	21.123	20.4217	20.0523	20.5956	19.3002	19.3088	19.094	18.5943	18.924	19.204	18.6835	18.9863	19.5846	19.5618	19.7941	19.872	19.3452	F1SL22	VWF	F1SL22_PIG	von Willebrand factor	4.55801e-07	1e-05	1.23769	0.999961	0.92338	0.0352304	0.10912	0.39423	0.591103	7.757e-07	1e-05	-1.20246	0.0209083	0.12891	0.64659	0.107965	0.43691	0.555873
103	A0A287BM29;F1SJT7	19.3859	20.4441	20.0182	20.3621	19.9675	19.897	20.2725	20.6383	20.7137	20.5288	20.3185	20.0502	19.346	19.704	19.8554	19.1322	19.3042	19.4456	19.2172	19.0454	19.7402	19.3964	19.6209	19.4089	A0A287BM29;F1SJT7	APOA4	A0A287BM29_PIG;F1SJT7_PIG	Apolipoprotein A-IV	0.0368212	0.19264	0.407866	0.00131174	0.02341	-0.547916	0.000244125	0.00329	-0.607619	5.53503e-10	0	-0.955782	5.06273e-11	0	1.01548	0.959958	0.86169	-0.0597026
104	P06867	17.1549	19.3805	19.7791	18.7144	19.334	19.369	19.2183	18.1904	19.6896	19.3706	18.7625	19.1718	18.0505	19.0532	18.6951	19.3675	18.5361	19.2542	19.737	18.9372	18.7524	19.0179	20.5163	19.8784	P06867	PLG	PLMN_PIG	Plasminogen	0.989581	0.85373	0.111873	0.975331	0.92338	-0.129239	0.579648	0.83184	0.517879	0.886316	0.81194	-0.241111	0.765178	0.85274	-0.406007	0.312042	0.85491	0.647118
105	A0A5K1TWC1;F1SQX9	19.1639	19.9383	19.0729	19.4839	18.6266	20.0423	19.178	18.1582	18.9797	19.1295	18.092	20.0207	19.6365	19.7486	18.8536	19.7893	18.9856	19.2099	19.2388	18.8913	19.674	19.0691	19.4878	19.366	A0A5K1TWC1;F1SQX9	APOD	A0A5K1TWC1_PIG;F1SQX9_PIG	Apolipoprotein D	0.623456	0.85373	-0.461606	1	0.92338	-0.0173934	0.689983	0.83184	-0.100156	0.625334	0.81194	0.444213	0.999862	0.85274	-0.36145	0.672157	0.86169	-0.0827629
106	F1SH96	18.1981	19.3761	19.5997	19.4527	19.4543	18.0465	19.0036	19.109	17.7357	19.161	18.1996	18.3157	18.8492	18.8711	20.1386	19.6443	19.7119	19.7494	19.4609	19.4756	18.3898	19.0394	19.0359	17.7709	F1SH96	ITIH1	F1SH96_PIG	Inter-alpha-trypsin inhibitor heavy chain H1	0.052946	0.2496	-0.4338	0.214014	0.85512	0.472859	0.986973	0.83184	-0.159175	6.03469e-05	0.00058	0.906658	0.0470416	0.21218	-0.274625	0.419381	0.86169	-0.632033
107	I3LEE6	19.5107	19.0135	18.8489	19.3254	19.1122	19.4481	19.0885	19.2	19.795	19.0611	20.1666	19.1133	18.7598	19.0629	18.7828	18.2901	18.2572	19.457	18.855	18.7415	19.147	19.0895	18.4923	18.842	I3LEE6	PCOLCE	I3LEE6_PIG	Procollagen C-endopeptidase enhancer	0.752371	0.85373	0.19429	0.119278	0.61988	-0.441506	0.337366	0.78698	-0.348583	0.00742125	0.0401	-0.635795	0.0411417	0.19511	0.542873	0.958976	0.86169	0.0929222
108	A0A286ZJL9;A0A287A2V7;A0A287ATT2;A0A287B9G9	18.5942	19.9248	18.7601	19.1337	18.4795	19.6469	19.2046	18.2262	18.7938	18.618	18.4032	19.3864	20.1853	18.9572	19.0855	19.5389	19.4793	18.1356	18.9993	19.1504	19.5106	18.4068	19.1031	18.6335	A0A286ZJL9;A0A287A2V7;A0A287ATT2;A0A287B9G9	NA	A0A286ZJL9_PIG;A0A287A2V7_PIG;A0A287ATT2_PIG;A0A287B9G9_PIG	Uncharacterized protein	0.900619	0.85373	-0.317855	0.962025	0.92338	0.140426	0.507626	0.83184	-0.122584	0.653936	0.81194	0.458281	0.910955	0.85274	-0.195271	0.23343	0.73509	-0.26301
109	A0A287A690;A0A287AJ76	19.0881	19.7638	19.0342	19.6203	19.2826	19.6117	19.2556	20.0164	19.9983	19.5828	19.0726	18.8382	20.0804	20.168	20.1221	21.3181	20.1698	20.2022	19.3139	19.4018	18.5296	19.1218	19.1139	19.4884	A0A287A690;A0A287AJ76	PRDX2	A0A287A690_PIG;A0A287AJ76_PIG	Peroxiredoxin-2;Peroxiredoxin	0.982581	0.85373	0.0605523	2.96188e-05	0.00131	0.943332	0.487391	0.83184	-0.238557	0.000296453	0.00233	0.882779	0.322286	0.68878	0.299109	1.62408e-08	0	-1.18189
110	O11780	18.9657	19.1558	18.8097	18.9796	19.264	19.2779	18.4924	18.2214	18.3878	17.7602	19.3933	17.5874	19.2468	18.9513	18.9774	18.3257	18.3695	19.811	18.9586	18.2672	17.9999	17.9745	17.5563	18.1191	O11780	TGFBI	BGH3_PIG	Transforming growth factor-beta-induced protein ig-h3	0.0122755	0.08102	-0.768372	0.985128	0.92338	-0.128495	0.00580735	0.0408	-0.929515	0.0375016	0.15075	0.639877	0.98894	0.85274	0.161143	0.0141166	0.09939	-0.80102
111	F1RN76	18.8761	18.6903	18.9544	18.5448	18.6812	18.8494	19.2785	18.8544	19.146	19.5133	17.8702	19.5409	18.615	19.3282	18.9115	19.3115	19.0059	19.0826	18.9367	18.8722	19.3173	19.1667	18.8364	19.0687	F1RN76	CD5L	F1RN76_PIG	Uncharacterized protein	0.472732	0.85373	0.267876	0.374983	0.92338	0.27646	0.352538	0.81191	0.266983	0.998086	0.81194	0.00858451	0.994626	0.85274	0.000892911	0.999824	0.86169	-0.00947742
112	F1S902	18.5622	19.0842	18.4858	19.2243	18.5525	19.2176	19.1866	19.0179	18.6508	18.6736	19.2617	18.7786	18.8449	18.5506	18.5614	18.4602	18.6395	18.9861	18.687	18.3332	18.3906	18.6137	18.2484	18.3573	F1S902	COMP	F1S902_PIG	Cartilage oligomeric matrix protein	0.947939	0.85373	0.0737669	0.588885	0.92338	-0.180639	0.0224631	0.11737	-0.416076	0.27329	0.63852	-0.254406	0.00423812	0.04036	0.489843	0.344548	0.86169	-0.235437
113	A0A5G2QC96	19.1794	19.3561	18.6615	19.1353	18.937	19.0416	18.5189	18.77	18.9282	18.2435	18.3396	18.747	18.9655	19.5159	18.8446	18.8834	18.9869	18.5858	18.6416	18.6301	18.8425	18.8939	18.5993	19.0631	A0A5G2QC96	F13B	A0A5G2QC96_PIG	Coagulation factor XIII B chain	0.00376084	0.03133	-0.460619	0.890225	0.92338	-0.0881262	0.00379637	0.02912	-0.273399	0.0369101	0.15075	0.372493	0.999954	0.85274	-0.187221	0.0298651	0.17242	-0.185272
114	A0A287A6X2;A0A287BFR9;A0A287BQU3;F1S4H5;I3LTV7	19.222	11.7725	19.2091	20.5247	16.8216	20.7097	15.0807	18.3337	17.2512	18.8585	17.4874	23.5072	20.9505	21.8037	19.454	18.5481	17.8344	17.7897	17.743	9.80554	18.9307	18.7522	18.9716	21.2933	A0A287A6X2;A0A287BFR9;A0A287BQU3;F1S4H5;I3LTV7	NTRK2	A0A287A6X2_PIG;A0A287BFR9_PIG;A0A287BQU3_PIG;F1S4H5_PIG;I3LTV7_PIG	Tyrosine-protein kinase receptor;Neurotrophic receptor tyrosine kinase 2;Tyrosine-protein kinase receptor;BDNF/NT-3 growth factors receptor isoform X5;Tyrosine-protein kinase receptor	0.995511	0.85373	0.376507	0.872428	0.92338	1.35348	0.975038	0.83184	-0.460558	0.952286	0.81194	0.976972	0.916735	0.85274	0.837066	0.633142	0.86169	-1.81404
115	I3LUR7	19.3588	19.0055	18.9266	19.0552	19.0059	19.1586	18.8129	18.6299	19.0689	18.7944	19.1483	18.9819	18.8212	18.9463	18.7937	18.4047	18.7461	19.1179	18.6142	18.5883	18.9094	19.2876	18.6148	18.6534	I3LUR7	COL6A3	I3LUR7_PIG	Collagen type VI alpha 3 chain	0.411455	0.85373	-0.179027	0.0839957	0.52048	-0.280095	0.0586901	0.24906	-0.307143	0.838516	0.81194	-0.101068	0.743436	0.85274	0.128116	0.99715	0.86169	-0.0270479
116	Q0Z8R0	19.0222	18.8155	18.6163	18.2126	18.7822	18.1725	19.1253	19.1254	18.465	18.7494	19.3216	19.3779	18.8549	18.6861	18.7171	18.668	18.4181	18.7621	18.5079	18.8042	19.1488	18.6748	18.0228	18.3892	Q0Z8R0	CST3	Q0Z8R0_PIG	Cystatin C	0.0301281	0.16465	0.423911	0.853429	0.92338	0.0808377	0.939335	0.83184	-0.0122786	0.211508	0.53935	-0.343073	0.174541	0.482	0.43619	0.996973	0.86169	-0.0931163
117	F1SFA7	18.879	19.2081	18.3815	19.2832	19.0747	18.9238	18.4356	18.7312	18.8649	18.5155	18.8806	18.0097	18.2716	17.9065	17.7874	17.9057	18.0094	18.417	17.5696	17.5011	17.7701	17.0747	17.1962	17.4864	F1SFA7	COL1A2	F1SFA7_PIG	Fibrillar collagen NC1 domain-containing protein	0.0565648	0.26093	-0.38547	1.11456e-08	0	-0.908764	0	0	-1.52533	0.00413004	0.02457	-0.523294	1.43707e-12	0	1.13987	0.00035869	0.00478	-0.616571
118	A0A0A0MY58;A0A286ZNH4;A0A287A1M4;A0A287ARX1;A0A287BP38;P01846	18.6268	20.1864	18.1218	18.6814	18.0396	19.1901	18.6031	17.4242	18.4915	19.0502	17.6687	18.9357	19.5687	18.4273	18.6862	19.3602	18.8935	17.2744	19.2037	18.9086	19.1273	18.2156	19.0692	17.7845	A0A0A0MY58;A0A286ZNH4;A0A287A1M4;A0A287ARX1;A0A287BP38;P01846	NA	A0A0A0MY58_PIG;A0A286ZNH4_PIG;A0A287A1M4_PIG;A0A287ARX1_PIG;A0A287BP38_PIG;LAC_PIG	Uncharacterized protein;Uncharacterized protein;Uncharacterized protein;Uncharacterized protein;Uncharacterized protein;Ig lambda chain C region	0.865629	0.85373	-0.445471	0.983997	0.92338	-0.105958	0.768821	0.83184	-0.0895164	0.975259	0.81194	0.339513	0.997329	0.85274	-0.355955	0.921093	0.86169	0.0164417
119	A0A5G2QXT5	18.57	19.6411	17.7727	18.7905	17.3606	18.9157	18.9021	16.6986	18.6134	18.4522	17.6306	18.8411	20.111	18.6675	18.5245	19.1114	18.9313	16.8603	19.0071	18.7941	19.0697	18.3424	18.8514	18.4818	A0A5G2QXT5	NA	A0A5G2QXT5_PIG	Uncharacterized protein	0.999999	0.85373	-0.318782	0.965104	0.92338	0.192574	0.954206	0.83184	0.249318	0.971232	0.81194	0.511355	0.961172	0.85274	-0.5681	0.756093	0.86169	0.0567443
120	P79263	19.3763	18.7921	19.0009	18.4064	17.768	19.7294	19.4426	17.9247	18.9662	19.3882	19.5644	20.088	19.8447	19.3028	18.9508	19.327	18.1051	19.497	19.6867	18.2093	21.1957	19.0379	18.4923	19.655	P79263	ITIH4	ITIH4_PIG	Inter-alpha-trypsin inhibitor heavy chain H4	0.797122	0.85373	0.383479	0.870043	0.92338	0.325703	0.611462	0.83184	0.533954	0.998983	0.81194	-0.0577759	0.986737	0.85274	-0.150475	0.961896	0.86169	0.208251
121	A0A286ZM84;A0A286ZTU7;A0A287AJE3	17.867	19.1596	13.02	17.3762	13.75	17.1432	19.9111	18.2334	19.1319	16.6492	20.5263	18.8908	18.7473	18.2926	20.234	20.9011	20.4416	20.863	18.3415	20.5868	20.4815	19.0844	19.7266	18.5164	A0A286ZM84;A0A286ZTU7;A0A287AJE3	LOC106504547	A0A286ZM84_PIG;A0A286ZTU7_PIG;A0A287AJE3_PIG	SERPIN domain-containing protein	0.0138345	0.08925	2.50446	0.000131825	0.00453	3.52727	0.0019021	0.01692	3.07021	0.609581	0.81194	1.02281	0.90703	0.85274	-0.565743	0.949914	0.86169	-0.457066
122	A0A287AP71;A0A5G2RAV3;F1SQL2	18.8502	18.8471	18.7224	18.9013	18.5669	19.0882	18.7289	18.3321	18.3464	18.7074	18.6058	19.1438	18.6404	18.9157	18.5694	18.3225	18.6148	18.5187	18.2745	18.5032	18.7893	18.6632	18.7018	18.6003	A0A287AP71;A0A5G2RAV3;F1SQL2	EFEMP1	A0A287AP71_PIG;A0A5G2RAV3_PIG;F1SQL2_PIG	EGF containing fibulin extracellular matrix protein 1	0.372037	0.85373	-0.185312	0.183407	0.78434	-0.232433	0.172796	0.52096	-0.240652	0.976182	0.81194	-0.0471212	0.963543	0.85274	0.0553396	0.999831	0.86169	-0.00821833
123	K7GQN2	15.7329	17.6866	19.4777	18.1708	19.6608	18.6841	19.5415	19.2052	17.8463	19.7741	18.7038	17.6904	17.9502	18.399	18.797	17.2757	18.7099	19.3844	19.2868	19.4774	17.9505	18.2093	19.0322	17.8673	K7GQN2	FAP	K7GQN2_PIG	Fibroblast activation protein alpha	0.999983	0.85373	0.55809	0.948392	0.92338	0.183922	0.124392	0.42903	0.401776	0.962605	0.81194	-0.374167	0.200409	0.52601	0.156314	0.316629	0.85688	0.217854
124	Q5U9S1	19.0931	15.8981	15.8142	18.6171	15.9504	18.4987	15.8272	18.8573	15.3669	18.6769	18.5519	15.6455	18.9268	15.5747	19.1626	15.7642	18.531	15.7243	18.9695	18.9574	19.0682	19.1772	18.6379	18.6996	Q5U9S1	MBL1	MBL1_PIG	Mannose-binding protein A	0.996237	0.85373	-0.157657	0.992186	0.92338	-0.0313381	0.319465	0.77082	1.60637	0.999908	0.81194	0.126319	0.219108	0.55178	-1.76402	0.176884	0.6233	1.63771
125	I3LS87	18.5948	18.9412	18.1687	18.603	18.2612	18.7251	18.8244	18.6824	18.7924	18.5027	18.8409	18.6371	18.5906	18.4537	18.4694	18.2381	18.3584	18.5088	18.5449	18.5436	18.5242	18.2799	18.3389	18.1896	I3LS87	VASN	I3LS87_PIG	Vasorin	0.32163	0.82104	0.164317	0.732104	0.92338	-0.112507	0.618808	0.83184	-0.145499	0.0328763	0.139	-0.276825	0.0219503	0.13155	0.309816	0.996653	0.86169	-0.0329918
126	I3LDM7	19.847	13.5066	12.3821	19.757	19.5456	20.2166	18.6041	14.8729	19.3105	12.2292	18.5298	14.0577	15.1071	19.8398	12.3313	14.8022	14.6084	14.4947	18.9316	19.1199	14.7007	19.461	19.5231	13.943	I3LDM7	GLO1	I3LDM7_PIG	Lactoylglutathione lyase	0.837328	0.85373	-1.27515	0.476843	0.92338	-2.34527	0.996259	0.83184	0.0707274	0.930031	0.81194	-1.07012	0.731847	0.85274	-1.34588	0.344683	0.86169	2.416
127	F1SM72	18.8018	18.7981	18.4356	18.2806	18.4361	18.3278	18.5396	18.5878	18.563	18.4755	18.731	18.536	18.5803	18.6368	18.6102	18.3461	18.5115	18.4988	18.4425	18.4505	18.3081	18.5239	18.2067	18.1926	F1SM72	NCAM1	F1SM72_PIG	Neural cell adhesion molecule 1	0.850996	0.85373	0.0588408	0.95865	0.92338	0.0173247	0.379438	0.83184	-0.159278	0.990705	0.81194	-0.0415161	0.0808699	0.30264	0.218119	0.141095	0.53357	-0.176603
128	A0A287AIJ3	18.3682	19.0933	19.0576	18.3472	18.4559	18.2964	18.5587	18.211	18.3565	19.1875	18.4133	19.2007	18.8378	18.9075	18.5808	19.2903	18.3904	18.6304	18.1543	18.1018	18.5185	18.5027	18.4113	17.7605	A0A287AIJ3	GPX3	A0A287AIJ3_PIG	Glutathione peroxidase	0.992805	0.85373	0.0515288	0.805174	0.92338	0.169764	0.246441	0.6646	-0.361573	0.923294	0.81194	0.118235	0.145545	0.43011	0.413101	0.0264667	0.15699	-0.531336
129	A0A5G2Q7A4;A0A5G2Q848;A0A5G2QCA1;A0A5G2RA57;F1S2C1;K7GME7;K7GST7	18.7946	18.3428	18.1896	18.931	18.4716	18.5825	18.0509	18.1786	18.4254	18.209	18.6467	18.4381	18.0331	18.2464	18.1709	18.1021	18.6532	18.177	17.8656	18.2436	18.1612	18.5139	17.9124	18.2312	A0A5G2Q7A4;A0A5G2Q848;A0A5G2QCA1;A0A5G2RA57;F1S2C1;K7GME7;K7GST7	COL11A2	A0A5G2Q7A4_PIG;A0A5G2Q848_PIG;A0A5G2QCA1_PIG;A0A5G2RA57_PIG;F1S2C1_PIG;K7GME7_PIG;K7GST7_PIG	Collagen type XI alpha 2 chain	0.238745	0.69357	-0.227247	0.02525	0.25196	-0.321562	0.00229285	0.01976	-0.397368	0.776802	0.81194	-0.0943153	0.31753	0.68031	0.170121	0.854353	0.86169	-0.0758061
130	P14287	18.9897	18.4138	18.1699	17.7032	18.2447	18.1799	19.5846	19.0014	19.1318	19.1335	19.7069	19.316	18.1509	18.4799	18.1791	17.9005	18.7114	17.9788	18.3223	18.64	18.8163	18.414	18.4366	18.2719	P14287	SPP1	OSTP_PIG	Osteopontin	2.81175e-12	0	1.02884	0.992097	0.92338	-0.0500896	0.454983	0.83184	0.199997	4.04232e-13	0	-1.07893	2.78963e-06	8e-05	0.828839	0.285463	0.81621	0.250087
131	A0A5K1UBC7;I3LD86	18.0593	18.1906	18.1819	18.4035	18.162	18.4746	17.8598	17.8207	18.2524	18.2534	18.2473	17.9348	18.3376	18.2731	18.5926	18.3251	18.3308	18.2617	18.261	18.2479	18.1687	18.3342	18.646	18.301	A0A5K1UBC7;I3LD86	PGLYRP2	A0A5K1UBC7_PIG;I3LD86_PIG	N-acetylmuramoyl-L-alanine amidase	0.0270964	0.15401	-0.18389	0.702653	0.92338	0.108154	0.999369	0.83184	0.0811679	0.000791547	0.00547	0.292045	0.0244794	0.14175	-0.265058	0.775066	0.86169	-0.0269864
132	A0A5G2QKZ4;B6VNT8;P68137	18.3258	18.3096	17.3607	17.7978	17.8037	18.4603	18.1274	19.5969	19.199	18.4901	19.6742	17.8008	18.2435	17.8583	17.8886	19.731	17.5562	18.8928	18.0339	18.0946	18.4081	18.2596	17.9473	17.7407	A0A5G2QKZ4;B6VNT8;P68137	ACTC1;ACTC1;ACTA1	A0A5G2QKZ4_PIG;B6VNT8_PIG;ACTS_PIG	Uncharacterized protein;Actin, alpha cardiac muscle 1;Actin, alpha skeletal muscle	0.0613899	0.2766	0.805071	0.732879	0.92338	0.352047	0.999513	0.83184	0.0710295	0.472579	0.81194	-0.453024	0.097102	0.34192	0.734042	0.796953	0.86169	-0.281018
133	I3L5U6	18.1804	17.8475	18.4056	17.972	18.2569	17.7093	18.7309	18.008	17.6238	18.597	18.5903	18.7715	18.7568	18.6411	18.9478	18.8659	17.7193	19.0507	18.9613	19.1264	19.2955	19.17	18.2695	18.4043	I3L5U6	LBP	I3L5U6_PIG	Uncharacterized protein	0.55413	0.85373	0.324995	0.0119333	0.14571	0.601668	5.33166e-05	0.00084	0.809231	0.325831	0.69968	0.276673	0.0158663	0.10301	-0.484236	0.443182	0.86169	0.207563
134	F1RRW5	18.264	18.2159	18.528	18.6841	18.2357	18.6148	18.5071	18.4082	18.7171	18.705	18.0743	18.3544	18.2385	18.3363	18.4478	18.0825	18.4904	18.1976	17.8915	17.9821	17.9473	18.1895	18.3891	17.9628	F1RRW5	ACE	F1RRW5_PIG	Angiotensin-converting enzyme	0.979781	0.85373	0.0372617	0.377713	0.92338	-0.124927	0.000117152	0.00166	-0.363378	0.192144	0.50741	-0.162188	1.90597e-05	0.00041	0.40064	0.0278375	0.164	-0.238452
135	F1RMN6	19.2561	18.115	18.3296	18.3621	18.5428	19.2142	17.2409	18.5576	19.5831	18.0734	18.0446	17.3396	16.0544	19.4205	18.8195	17.7944	18.2707	17.6129	18.1875	19.7835	18.7848	17.9966	19.3609	18.6648	F1RMN6	SMPD1	F1RMN6_PIG	Sphingomyelin phosphodiesterase	0.668223	0.85373	-0.49676	0.428839	0.92338	-0.641231	0.995551	0.83184	0.159687	0.980026	0.81194	-0.144472	0.542172	0.85274	-0.656447	0.296501	0.83912	0.800919
136	A0A287BPF4	18.7629	18.0934	17.8353	18.2055	18.1586	18.2824	18.3404	17.9223	18.0994	17.471	18.4996	18.1787	18.2637	18.3197	17.9882	17.7142	18.3445	18.4555	18.0935	18.1384	17.9331	18.3555	17.9887	18.3431	A0A287BPF4	COL6A3	A0A287BPF4_PIG	Collagen type VI alpha 3 chain	0.775049	0.85373	-0.137782	0.999736	0.92338	-0.0420501	0.998662	0.83184	-0.0809667	0.826997	0.81194	0.0957322	0.868014	0.85274	-0.0568156	0.999883	0.86169	-0.0389166
137	A0A5G2QWE9;A0A5G2R2Y1;F1SSL6	18.3243	18.8064	18.6933	19.1202	18.3076	18.6024	18.2579	18.456	18.2965	18.062	18.2666	18.522	17.8351	18.3961	18.4278	18.204	18.5389	18.1099	18.5651	18.2983	18.29	18.3212	18.0823	18.3546	A0A5G2QWE9;A0A5G2R2Y1;F1SSL6	PSMA3	A0A5G2QWE9_PIG;A0A5G2R2Y1_PIG;F1SSL6_PIG	Proteasome subunit alpha type	0.0304858	0.16491	-0.332224	0.00811492	0.10758	-0.3904	0.0509984	0.22558	-0.32381	0.967706	0.81194	-0.0581759	0.999631	0.85274	-0.00841328	0.942912	0.86169	0.0665892
138	A0A5G2RD43;A0A5G2RI05	18.5086	18.2592	18.5355	18.8048	18.3944	17.996	17.897	17.9357	18.7373	18.2096	17.4885	18.372	18.2073	18.2801	17.9898	17.8915	18.1569	17.8876	17.7625	17.9187	18.2204	17.8657	18.4038	18.2753	A0A5G2RD43;A0A5G2RI05	LOC110256000	A0A5G2RD43_PIG;A0A5G2RI05_PIG	Amine oxidase	0.190981	0.60466	-0.309738	0.0942607	0.54332	-0.347558	0.0921178	0.35326	-0.342025	0.986366	0.81194	-0.0378206	0.978954	0.85274	0.0322872	0.999904	0.86169	0.00553335
139	A0A287A4Y3	17.9557	18.6688	17.0951	18.1516	17.314	18.5745	18.7843	16.6109	17.9603	17.4998	17.0472	18.5568	19.9537	18.7013	17.919	18.5667	18.2832	16.0822	18.1001	18.295	18.3604	17.6107	18.5232	18.1816	A0A287A4Y3	NA	A0A287A4Y3_PIG	Ig-like domain-containing protein	0.990446	0.85373	-0.21672	0.866997	0.92338	0.291059	0.971149	0.83184	0.21854	0.970515	0.81194	0.507779	0.905021	0.85274	-0.435259	0.627228	0.86169	-0.0725193
140	Q711S8	18.0751	17.3539	18.0945	17.9277	18.2015	17.9709	17.6416	18.059	17.4673	18.0242	17.8311	18.0751	18.2416	18.5291	18.3632	18.5013	18.6771	18.2299	18.4311	18.6173	18.6348	18.4785	18.347	18.2535	Q711S8	SPP2	SPP24_PIG	Secreted phosphoprotein 24	0.885221	0.85373	-0.0875423	0.000370159	0.00987	0.486451	0.000157549	0.00216	0.523103	2.08627e-05	0.00023	0.573994	5.80428e-06	0.00016	-0.610645	0.992037	0.86169	0.0366513
141	A0A286ZQ85;F1RYI8	18.5262	18.391	17.1029	19.0037	17.794	18.8572	17.0404	17.4135	17.72	17.3905	18.4579	17.5089	17.7973	17.6182	17.5224	17.5633	16.8734	18.1973	17.1646	16.4218	17.7954	16.911	17.1186	17.3331	A0A286ZQ85;F1RYI8	COL3A1	A0A286ZQ85_PIG;F1RYI8_PIG	Uncharacterized protein;Collagen alpha-1(III) chain preproprotein	0.0654	0.28864	-0.690651	0.0678732	0.45537	-0.683851	0.000301467	0.00365	-1.15507	1	0.81194	0.0067993	0.342168	0.71521	0.464416	0.324398	0.86169	-0.471216
142	F1SAE9	18.379	18.4081	17.9233	18.5216	17.9867	18.3505	17.9016	18.1188	18.7691	18.1629	18.1921	18.4192	18.3989	18.5397	18.0278	18.1963	18.5063	18.1624	18.1098	18.1743	17.9608	18.2185	18.2011	18.2677	F1SAE9	LAMB1	F1SAE9_PIG	Laminin subunit beta 1	0.280131	0.74644	-0.000936152	0.936659	0.92338	0.0436866	0.00286156	0.02323	-0.106178	0.620697	0.81194	0.0446227	1.14897e-05	0.00028	0.105242	0.000232827	0.0036	-0.149864
143	F1RM45	18.4324	18.0177	17.7913	18.0182	17.8278	18.5979	17.391	17.7685	17.3098	17.3499	16.6934	18.2467	18.8975	19.3105	18.9152	19.0256	19.0653	19.0722	18.5006	18.3846	18.8456	18.6561	18.6623	18.8232	F1RM45	APOE	F1RM45_PIG	Apolipoprotein E	0.000962316	0.01007	-0.654333	2.74776e-10	0	0.93349	0.00364612	0.02822	0.531199	0	0	1.58782	7.34952e-11	0	-1.18553	0.0232411	0.14376	-0.402291
144	A0A286ZSJ7	18.5201	18.7374	18.1553	18.3231	18.2798	17.8784	18.2614	17.1131	18.1406	17.6382	18.2361	18.3314	18.6393	18.2006	17.8782	18.3625	18.1695	18.996	18.656	18.455	18.8737	18.0723	17.8517	18.6713	A0A286ZSJ7	C1QC	A0A286ZSJ7_PIG	Complement C1q C chain	0.271227	0.74112	-0.362205	0.9663	0.92338	0.0586709	0.806089	0.83184	0.114317	0.108223	0.33199	0.420876	0.0407446	0.19507	-0.476522	0.969279	0.86169	0.055646
145	A0A287AS25;A0A5G2QKR9;A0A5G2R4M3	18.0228	17.4779	18.996	17.1457	18.6441	18.0947	17.8666	18.2427	16.7732	18.0631	17.5637	17.8005	18.6357	18.0582	18.983	18.4252	18.8424	18.8161	18.307	17.1271	18.1396	18.4229	17.5988	17.5048	A0A287AS25;A0A5G2QKR9;A0A5G2R4M3	ITIH3	A0A287AS25_PIG;A0A5G2QKR9_PIG;A0A5G2R4M3_PIG	Inter-alpha-trypsin inhibitor heavy chain 3	0.140047	0.51325	-0.345229	0.0667867	0.45239	0.563255	0.999993	0.83184	-0.213473	3.03732e-05	0.00032	0.908484	0.201453	0.52636	-0.131756	0.0846453	0.3611	-0.776728
146	A0A287BH90;F1SMJ6	17.4383	18.1881	18.6432	18.0143	18.5414	17.7797	18.4023	17.4931	17.5784	18.2428	17.8497	17.5659	18.0587	18.1247	18.5052	18.5571	17.8434	18.4539	18.5456	18.4802	18.4386	18.4539	18.123	18.1078	A0A287BH90;F1SMJ6	C9	A0A287BH90_PIG;F1SMJ6_PIG	MACPF domain-containing protein	0.0478037	0.23304	-0.245455	0.717017	0.92338	0.156359	0.0601923	0.25415	0.257358	0.00230442	0.01446	0.401813	1.82131e-05	0.0004	-0.502812	0.421101	0.86169	0.100999
147	A0A287AG58	17.6451	18.8635	17.8181	17.5285	17.8952	17.9062	18.2295	17.9822	18.2365	17.6358	18.2183	18.2538	18.5901	18.1079	18.1389	18.7026	18.2681	18.1147	19.0221	18.8407	18.1212	18.1914	18.5732	18.634	A0A287AG58	PZP	A0A287AG58_PIG	Uncharacterized protein	0.652464	0.85373	0.149922	0.0199901	0.2108	0.377609	0.000319861	0.00382	0.621002	0.358109	0.73091	0.227687	0.0434033	0.20263	-0.47108	0.591859	0.86169	0.243393
148	O46409	18.8055	19.5111	18.9868	19.5551	18.8378	18.9096	19.6152	19.6528	19.4814	19.4633	19.0149	19.0774	18.273	18.4742	18.483	18.1659	18.2687	18.4282	18.0989	17.8173	18.4464	18.5614	18.8745	18.8606	O46409	APOA4	APOA4_PIG	Apolipoprotein A-IV	0.306003	0.79561	0.28319	2.21596e-05	0.00108	-0.75215	0.00040472	0.00451	-0.657808	7.68933e-10	0	-1.03534	6.40569e-08	0	0.940998	0.945372	0.86169	0.0943417
149	A0A075B7H9	17.4566	19.1664	17.9491	17.565	18.8175	18.2687	19.2689	18.5371	17.1224	19.3566	18.8999	17.9281	18.0561	17.1633	17.6208	18.7906	17.5054	17.7437	17.7312	18.7992	18.3049	19.1811	16.7939	16.7052	A0A075B7H9	NA	A0A075B7H9_PIG	Ig-like domain-containing protein	0.879306	0.85373	0.314945	0.800773	0.92338	-0.390574	0.920064	0.83184	-0.28465	0.352988	0.72737	-0.705518	0.525894	0.85274	0.599595	0.994143	0.86169	0.105924
150	A0A287BCT9;A0A287BJ87	18.0432	18.223	17.9862	18.4196	18.083	18.2806	18.0809	17.8535	18.2734	18.0273	17.6817	18.1638	18.0438	18.0394	18.1304	17.9684	18.4667	17.7746	17.9116	18.0251	17.8837	17.9342	18.2112	18.0271	A0A287BCT9;A0A287BJ87	EXTL2	A0A287BCT9_PIG;A0A287BJ87_PIG	Exostosin like glycosyltransferase 2	0.500247	0.85373	-0.159165	0.484672	0.92338	-0.102062	0.00889152	0.05807	-0.173785	1	0.81194	0.0571039	0.350471	0.72374	0.0146198	0.262645	0.78703	-0.0717237
151	A0A5G2RA87;F1RWV1;K7GQR1	18.031	18.1114	17.4983	17.7006	17.5014	18.0265	18.3587	17.4933	18.0522	17.3407	17.9004	18.5212	18.1691	17.832	17.8256	18.144	18.057	17.9062	18.0784	18.1131	18.2553	17.9236	18.1822	18.1791	A0A5G2RA87;F1RWV1;K7GQR1	CFP	A0A5G2RA87_PIG;F1RWV1_PIG;K7GQR1_PIG	Complement factor properdin	0.291638	0.76992	0.132862	0.384252	0.92338	0.177424	0.245508	0.66422	0.3104	0.99672	0.81194	0.0445619	0.999254	0.85274	-0.177537	0.985057	0.86169	0.132975
152	P50828	17.9557	17.6299	17.5577	18.0555	18.0391	17.9128	17.5796	17.4536	17.651	17.2411	17.6081	18.278	17.935	18.9561	17.663	18.1233	18.2278	17.9125	18.9304	18.665	18.8714	18.7503	18.9022	18.8918	P50828	HPX	HEMO_PIG	Hemopexin	0.84609	0.85373	-0.223207	0.0532768	0.39553	0.277846	5.68767e-13	0	0.976764	0.00597065	0.03337	0.501053	1.69753e-13	0	-1.19997	2.39296e-06	7e-05	0.698918
153	A0A286ZIU5;A0A287ARJ8;F1SCC6	17.2784	17.4144	18.6547	16.371	18.5128	18.3724	21.6311	21.3394	19.8912	21.5598	20.782	20.9841	16.7637	17.992	16.5262	18.048	15.2896	18.7067	21.0307	21.0801	21.6745	21.5729	20.7248	20.4525	A0A286ZIU5;A0A287ARJ8;F1SCC6	SERPINA3-2	A0A286ZIU5_PIG;A0A287ARJ8_PIG;F1SCC6_PIG	SERPIN domain-containing protein	3.88578e-14	0	3.26397	0.65363	0.92338	-0.546243	0	0	3.32196	0	0	-3.81022	0.616211	0.85274	-0.0579829	0	0	3.8682
154	A0A5G2QG32;A0A5G2QIU0;F1RL77;I3LJV6	17.8966	18.1809	17.923	18.2166	17.9315	17.9715	18.4421	17.8628	18.2759	18.2444	18.1647	18.0847	17.9711	17.7455	17.9536	17.8838	17.9015	18.1229	17.9748	17.5473	18.0514	18.0361	17.8888	17.4934	A0A5G2QG32;A0A5G2QIU0;F1RL77;I3LJV6	CSF1R	A0A5G2QG32_PIG;A0A5G2QIU0_PIG;F1RL77_PIG;I3LJV6_PIG	Colony stimulating factor 1 receptor	0.355217	0.84811	0.15909	0.783379	0.92338	-0.090294	0.223265	0.62427	-0.188067	0.0503371	0.19065	-0.249384	0.00271009	0.02903	0.347157	0.73984	0.86169	-0.0977732
155	A0A5G2QBJ9	17.6603	17.6005	17.5083	16.511	17.7919	16.6027	17.1767	17.2335	17.5245	16.5315	17.4778	17.4705	17.239	17.6895	17.8628	17.9127	17.4778	17.5165	18.0178	17.9066	17.7241	17.9514	18.1123	17.5517	A0A5G2QBJ9	APOF	A0A5G2QBJ9_PIG	Apolipoprotein F	0.995303	0.85373	-0.0433788	0.155176	0.72729	0.337253	0.00120805	0.01188	0.598188	0.0921673	0.30204	0.380632	0.000584446	0.00864	-0.641567	0.334925	0.86169	0.260935
156	F1RM49	18.021	17.8255	17.906	17.919	17.9491	18.2477	18.0531	17.8753	17.841	18.0319	18.2098	17.7513	17.7301	17.8211	18.0904	17.3987	17.4833	17.877	17.802	18.0437	17.809	18.019	17.8262	17.6202	F1RM49	PCDH12	F1RM49_PIG	Protocadherin 12	0.962016	0.85373	-0.0176433	0.0308552	0.28634	-0.244611	0.708125	0.83184	-0.124722	0.120722	0.3662	-0.226968	0.942363	0.85274	0.107079	0.377039	0.86169	0.119888
157	A0A287ATP0	18.4719	17.9998	17.6013	17.8689	17.7015	17.5129	17.9022	18.0844	17.584	18.0632	18.4846	17.9198	17.5963	17.7487	17.8474	17.6608	17.6385	17.9679	17.6914	17.949	17.5003	17.9539	17.3186	17.6735	A0A287ATP0	HSPG2	A0A287ATP0_PIG	Heparan sulfate proteoglycan 2	0.706021	0.85373	0.146991	0.90771	0.92338	-0.1161	0.788047	0.83184	-0.178245	0.304768	0.67883	-0.263091	0.199016	0.52601	0.325236	0.992243	0.86169	-0.0621447
158	F1S0J2	17.5549	18.2169	17.8931	17.9978	17.9639	18.1573	17.7893	17.8958	18.0331	17.7414	17.3426	17.7242	17.5847	18.2422	17.7225	17.8349	17.8207	17.9519	18.0768	18.2418	18.1629	18.0923	18.2531	18.2477	F1S0J2	C4BPA	F1S0J2_PIG	Uncharacterized protein	0.193413	0.6101	-0.209591	0.819303	0.92338	-0.104505	0.126052	0.42903	0.215106	0.691128	0.81194	0.105086	0.000225205	0.00386	-0.424697	0.010062	0.0778	0.319611
159	A0A287BHP5	17.742	17.645	18.3908	17.9292	17.9651	17.9023	18.0157	17.9948	17.9348	18.3656	17.8289	17.4296	17.1666	18.1952	18.1431	18.1581	18.0358	17.8426	17.7042	18.0188	17.9217	18.0127	17.5797	17.5276	A0A287BHP5	MAN2B1	A0A287BHP5_PIG	Alpha-mannosidase	0.985271	0.85373	-0.00083109	0.994397	0.92338	-0.00551493	0.851338	0.83184	-0.13498	0.999621	0.81194	-0.00468384	0.971966	0.85274	0.134149	0.939048	0.86169	-0.129465
160	A0A5S6GE30;B3SP85	18.4041	17.825	17.9628	18.0846	17.9382	17.8355	18.2096	17.4674	18.4087	18.6781	17.5393	18.2044	17.2264	18.4837	17.5413	18.22	18.0798	17.6149	18.2204	17.9718	18.8778	18.2498	18.6869	18.5896	A0A5S6GE30;B3SP85	IFI30	A0A5S6GE30_PIG;GILT_PIG	Gamma-interferon-inducible-lysosomal thiol reductase	0.772598	0.85373	0.0762358	0.819047	0.92338	-0.14734	0.251142	0.6696	0.424343	0.2765	0.64075	-0.223576	0.834722	0.85274	-0.348107	0.0320931	0.18047	0.571683
161	Q9GLP1	17.668	17.8084	17.9916	17.5296	17.6478	17.4644	17.5125	17.1319	16.673	17.3671	16.9584	17.5856	17.8665	18.0577	18.234	18.3566	17.9158	17.7649	17.9874	17.9245	17.6181	17.493	17.7503	17.7164	Q9GLP1	F5	FA5_PIG	Coagulation factor V	0.000937883	0.00993	-0.480204	0.0186767	0.19922	0.347609	0.841816	0.83184	0.0633055	7.40716e-11	0	0.827814	3.74495e-05	0.00075	-0.54351	0.163241	0.58903	-0.284304
162	A0A286ZR55;A0A287ACM4	18.0172	18.1207	18.0256	17.2063	17.8713	17.9103	17.9083	17.8901	18.1707	17.6811	18.0078	18.1562	17.0659	17.8102	17.7724	17.65	17.8353	17.6385	17.8522	17.8803	17.4887	17.7096	17.4709	18.1269	A0A286ZR55;A0A287ACM4	NEO1	A0A286ZR55_PIG;A0A287ACM4_PIG	Neogenin 1	0.849404	0.85373	0.110445	0.441682	0.92338	-0.229842	0.98055	0.83184	-0.103818	0.098423	0.31619	-0.340287	0.645082	0.85274	0.214263	0.690386	0.86169	0.126024
163	I3LF89	17.4691	17.613	18.1596	18.1093	18.0033	18.218	17.9015	18.0392	18.7434	18.378	18.0413	17.9411	17.8432	17.7624	17.4452	18.3551	18.1933	17.4559	18.2451	18.3793	18.2593	18.6226	18.8096	18.5953	I3LF89	CPN2	I3LF89_PIG	Carboxypeptidase N subunit 2	0.14117	0.51325	0.245372	0.618607	0.92338	-0.0861835	0.00906162	0.05849	0.556471	0.0051752	0.02995	-0.331555	0.73363	0.85274	-0.311099	5.58044e-05	0.00112	0.642654
164	A0A286ZIC1	17.6976	17.5889	17.8419	17.6713	17.5821	17.8517	17.4912	17.2783	17.5758	17.5047	16.643	17.5745	17.6931	17.2828	18.3834	17.6027	17.9235	18.0959	17.7052	17.7884	17.9597	18.0082	18.2216	18.0175	A0A286ZIC1	GSN	A0A286ZIC1_PIG	Gelsolin	0.0734929	0.31528	-0.361011	0.885303	0.92338	0.124655	0.502942	0.83184	0.244509	0.00933462	0.04946	0.485666	0.00103335	0.01362	-0.60552	0.898062	0.86169	0.119854
165	A0A5G2QKI1;Q8MJ39	18.4215	18.3704	18.2237	17.9555	17.9824	18.1678	19.8921	19.5982	20.0348	19.5617	19.814	19.3103	18.1826	17.957	17.9383	17.7582	18.1293	17.785	19.0567	19.3257	18.8466	19.0899	18.9597	18.7904	A0A5G2QKI1;Q8MJ39	MGP	A0A5G2QKI1_PIG;MGP_PIG	Matrix Gla protein	0	0	1.51499	0.139157	0.67237	-0.228463	1.25278e-12	0	0.824636	0	0	-1.74346	1.88475e-09	0	0.690357	0	0	1.0531
166	A0A5G2QTX6;A0A5G2R4E4;F1SC57	17.9311	17.9687	17.8526	17.8914	17.5022	17.6921	17.8497	17.5784	17.8127	17.4915	17.3292	18.1115	17.3847	17.8903	17.7469	17.5678	18.2743	17.6601	17.8769	17.9051	17.6354	18.1494	18.2276	17.8323	A0A5G2QTX6;A0A5G2R4E4;F1SC57	PLTP	A0A5G2QTX6_PIG;A0A5G2R4E4_PIG;F1SC57_PIG	Phospholipid transfer protein	0.915711	0.85373	-0.110865	0.992138	0.92338	-0.0523503	0.770715	0.83184	0.13142	0.983129	0.81194	0.0585143	0.421386	0.80219	-0.242284	0.588408	0.86169	0.18377
167	P00339	18.5819	17.7776	17.0798	17.3561	17.2542	17.4926	17.5753	19.5269	18.3046	17.5238	18.1402	17.5038	18.6225	17.9516	17.6668	18.6292	17.8643	18.2121	17.5757	17.73	17.8697	17.7237	17.6408	17.7901	P00339	LDHA	LDHA_PIG	L-lactate dehydrogenase A chain	0.237813	0.69357	0.505392	0.125087	0.63088	0.56738	0.907252	0.83184	0.131287	0.98749	0.81194	0.0619879	0.660784	0.85274	0.374105	0.434883	0.86169	-0.436093
168	A0A287A6K7	17.8276	17.9914	18.0807	17.9597	17.6676	17.7419	17.833	17.6049	17.6263	17.8031	17.4823	17.1253	16.1281	17.0714	17.8117	16.9667	17.8846	16.6896	17.6321	17.9538	17.3403	17.9	17.8595	17.6512	A0A287A6K7	APMAP	A0A287A6K7_PIG	Adipocyte plasma membrane associated protein	0.43409	0.85373	-0.298992	0.000404128	0.00987	-0.786127	0.737017	0.83184	-0.155315	0.050107	0.19065	-0.487135	0.971887	0.85274	-0.143677	0.0136125	0.09742	0.630812
169	A0A287BPL8;I3L5Z1	17.5867	17.9489	17.912	17.2404	17.7038	17.2548	17.8148	17.3669	17.1174	17.5216	17.6199	17.6025	17.618	17.8582	17.7394	17.4425	17.473	17.8422	17.7657	17.4744	16.8938	17.5891	17.0454	17.1564	A0A287BPL8;I3L5Z1	CDH1	A0A287BPL8_PIG;I3L5Z1_PIG	Uncharacterized protein	0.716082	0.85373	-0.100577	0.822701	0.92338	0.0544464	0.520861	0.83184	-0.286972	0.227278	0.56619	0.155024	0.987865	0.85274	0.186394	0.110695	0.44381	-0.341418
170	F1S021	18.135	17.5629	17.1979	17.7398	17.566	17.7197	17.3564	17.2069	17.3413	16.9994	18.0175	17.3542	17.5819	17.4869	17.2713	17.0079	17.4516	17.8544	17.2872	17.2465	17.2985	17.1122	16.8789	17.4897	F1S021	COL5A1	F1S021_PIG	Fibrillar collagen NC1 domain-containing protein	0.254788	0.70519	-0.274264	0.579023	0.92338	-0.211212	0.049743	0.22238	-0.434726	0.946572	0.81194	0.0630526	0.859887	0.85274	0.160461	0.526714	0.86169	-0.223514
171	F1RUE4	16.1392	18.1397	17.7017	17.946	16.9329	17.4013	17.2755	16.8928	17.5975	17.7318	17.1335	18.015	17.9847	18.0123	17.6611	17.8538	17.616	16.8948	17.7303	17.047	16.704	17.6851	18.015	17.3974	F1RUE4	GPLD1	F1RUE4_PIG	Glycosylphosphatidylinositol specific phospholipase D1	0.961536	0.85373	0.064212	0.64435	0.92338	0.293651	0.960053	0.83184	0.0530066	0.915235	0.81194	0.229439	0.802385	0.85274	0.0112055	0.353146	0.86169	-0.240645
172	F1RLC4	18.0264	17.5673	17.4087	17.8523	17.5748	17.9087	17.8017	17.5762	17.8836	17.3736	17.7291	17.548	17.4631	17.6466	17.7316	17.3491	17.9915	17.974	17.443	17.4346	17.3443	17.5059	17.3386	17.5519	F1RLC4	LOX	F1RLC4_PIG	Lysyl oxidase homolog	0.912251	0.85373	-0.0709952	0.996378	0.92338	-0.0303975	0.0667311	0.27453	-0.286666	0.972108	0.81194	0.0405977	0.264367	0.61254	0.215671	0.0983423	0.40172	-0.256269
173	A0A287APX1;A0A5G2QNJ7;Q29095	18.1371	17.728	17.1549	17.6269	17.2716	17.2842	18.1004	17.8705	17.4694	17.5245	17.5993	18.1547	17.4674	17.7305	17.5915	17.6273	17.4281	17.2498	17.4277	17.7222	17.6982	18.1924	17.1468	17.4435	A0A287APX1;A0A5G2QNJ7;Q29095	PTGDS	A0A287APX1_PIG;A0A5G2QNJ7_PIG;PTGDS_PIG	Prostaglandin-H2 D-isomerase	0.350296	0.84811	0.252666	0.999554	0.92338	-0.0180043	0.810152	0.83184	0.0713234	0.419565	0.81129	-0.270671	0.893221	0.85274	0.181343	0.852972	0.86169	0.0893277
174	A0A5G2R1Q1;F1SB67	17.8248	17.7258	17.7325	17.7288	17.59	17.8137	17.6664	17.6528	17.8619	17.5172	17.5326	17.7358	17.6285	17.9853	17.6698	17.6841	17.8623	17.4715	17.6627	17.5049	17.3655	17.1745	17.4944	17.3028	A0A5G2R1Q1;F1SB67	IGF2R	A0A5G2R1Q1_PIG;F1SB67_PIG	Fibronectin type-II domain-containing protein;Insulin-like growth factor II receptor	0.973792	0.85373	-0.0748302	0.999036	0.92338	-0.0190312	5.94562e-06	0.00012	-0.318465	0.991607	0.81194	0.055799	0.000214825	0.00376	0.243635	5.33741e-06	0.00014	-0.299434
175	A0A0H5ANC0	17.8371	17.7348	17.5908	17.5418	17.4127	17.6618	17.598	17.6337	17.8149	17.8494	17.849	17.8505	17.5687	17.7083	17.5486	17.6851	17.3852	17.9069	17.5259	17.394	17.7578	17.8749	17.0539	17.4985	A0A0H5ANC0	OGN	A0A0H5ANC0_PIG	Osteoglycin	0.536919	0.85373	0.136082	0.999484	0.92338	0.0039612	0.790062	0.83184	-0.11234	0.615993	0.81194	-0.132121	0.115756	0.37435	0.248422	0.712464	0.86169	-0.116301
176	I3LMU6	17.8491	17.7711	17.5482	17.4194	17.3898	17.6283	17.4352	17.1959	17.3898	17.4761	17.4532	17.7809	17.2698	17.8239	17.434	17.2693	17.3143	17.7072	17.2148	17.3263	17.3059	17.7504	17.1724	17.4506	I3LMU6	RCN3	I3LMU6_PIG	Reticulocalbin 3	0.490551	0.85373	-0.145809	0.72089	0.92338	-0.13123	0.29686	0.74527	-0.230909	0.984752	0.81194	0.0145787	0.981104	0.85274	0.0851006	0.87889	0.86169	-0.0996793
177	A0A287BEH3;F1SDV5	17.9854	17.5422	17.6897	18.1441	17.5959	17.8403	17.5053	17.4298	17.8294	17.7045	17.2266	17.9095	17.651	17.7731	17.5792	17.588	17.9194	17.5313	17.6095	17.3534	17.2014	17.8043	17.5673	17.4215	A0A287BEH3;F1SDV5	EMILIN3	A0A287BEH3_PIG;F1SDV5_PIG	Elastin microfibril interfacer 3	0.503889	0.85373	-0.198733	0.592977	0.92338	-0.125923	0.00210196	0.0185	-0.306677	0.998428	0.81194	0.0728096	0.168885	0.47145	0.107944	0.0760127	0.34646	-0.180754
178	A0A5G2QE94;F1SIE1	18.3378	17.6245	17.4936	17.7149	17.2378	17.9803	17.6381	17.307	17.9532	17.4613	17.9261	17.6761	17.2059	17.5748	17.1539	17.1396	17.5082	17.7221	17.4405	17.4612	17.5841	17.6349	17.5282	17.5639	A0A5G2QE94;F1SIE1	ISLR	A0A5G2QE94_PIG;F1SIE1_PIG	Immunoglobulin superfamily containing leucine rich repeat	0.999968	0.85373	-0.0711701	0.0323061	0.2951	-0.347396	0.285459	0.72289	-0.195987	0.0460382	0.17725	-0.276226	0.370233	0.75009	0.124816	0.833858	0.86169	0.151409
179	A0A286ZN92;A0A287AGI2;A0A287B8T0;A0A287BJL7;A0A5S6H3C2;A0A5S6I4J7;P23695	17.8677	16.5972	16.9991	17.3398	16.7309	17.4111	16.8767	17.037	16.5418	16.9655	17.0931	17.2735	18.0587	18.1446	18.0761	18.3828	18.4845	17.9151	17.3088	17.101	17.8049	17.9449	17.3699	17.7631	A0A286ZN92;A0A287AGI2;A0A287B8T0;A0A287BJL7;A0A5S6H3C2;A0A5S6I4J7;P23695	IGF2	A0A286ZN92_PIG;A0A287AGI2_PIG;A0A287B8T0_PIG;A0A287BJL7_PIG;A0A5S6H3C2_PIG;A0A5S6I4J7_PIG;IGF2_PIG	Insulin-like growth factor II	0.680961	0.85373	-0.193082	2.63313e-08	0	1.0193	0.188005	0.55735	0.391084	1.88547e-11	0	1.21239	0.0109236	0.07933	-0.584166	0.00122678	0.01398	-0.62822
180	A0A287AL82	17.232	18.3663	17.8384	15.6483	17.1141	14.7894	15.6791	16.2849	18.057	16.3799	16.6883	18.1651	16.1422	17.7866	16.3651	17.6504	17.2833	15.9911	14.9073	18.7099	13.456	18.6688	15.3533	18.5313	A0A287AL82	SEMA4B	A0A287AL82_PIG	Semaphorin 4B	0.999935	0.85373	0.0443021	0.999952	0.92338	0.0383874	0.992677	0.83184	-0.22697	1	0.81194	-0.00591478	0.987543	0.85274	0.271272	0.987234	0.86169	-0.265357
181	A0A5G2Q8I9;F1SLX2	17.0584	17.9344	18.055	17.7097	17.7176	17.3525	17.4615	17.5525	17.5256	17.9715	17.0915	17.8464	17.1903	17.6661	17.5827	17.4652	17.7469	17.4469	17.473	17.5764	17.6351	17.3927	17.7925	17.1593	A0A5G2Q8I9;F1SLX2	A2M	A0A5G2Q8I9_PIG;F1SLX2_PIG	Alpha-2-macroglobulin	0.974575	0.85373	-0.0630916	0.848512	0.92338	-0.121588	0.818914	0.83184	-0.133114	0.979402	0.81194	-0.0584964	0.967092	0.85274	0.0700222	0.999811	0.86169	-0.0115259
182	A0A5K1TZS7;D5L7X4	18.1146	17.0842	17.3576	17.9297	17.3138	18.1136	16.5004	17.598	16.8211	17.5837	17.3299	16.7152	17.7906	17.455	17.8226	16.9411	17.8135	17.1298	17.4989	17.4668	17.3383	17.7965	17.635	17.4667	A0A5K1TZS7;D5L7X4	MASP1	A0A5K1TZS7_PIG;D5L7X4_PIG	Mannan binding lectin serine peptidase 1;Complement component MASP3	0.0183884	0.1135	-0.560895	0.720846	0.92338	-0.160157	0.730463	0.83184	-0.118548	0.252947	0.61613	0.400738	0.276556	0.62701	-0.442346	1	0.86169	0.0416083
183	A0A5G2R1P5;F1RQZ0	17.6317	17.1551	17.0861	17.3253	17.15	17.3097	17.4831	17.0217	17.4641	17.1377	17.1202	17.6783	17.2233	17.1494	17.2207	17.2029	17.5664	17.1768	17.2128	17.4912	17.422	17.4289	17.0013	17.2929	A0A5G2R1P5;F1RQZ0	GRN	A0A5G2R1P5_PIG;F1RQZ0_PIG	Uncharacterized protein	0.789968	0.85373	0.041201	0.998148	0.92338	-0.0197444	0.999585	0.83184	0.0318882	0.696263	0.81194	-0.0609453	0.779618	0.85274	0.00931273	0.999915	0.86169	0.0516326
184	F1SPS6	16.7569	17.7169	16.7753	17.816	17.2948	17.9001	16.8249	16.4838	17.7371	17.1801	17.4977	18.3299	17.4637	17.5454	17.4578	17.3231	17.0967	17.663	17.462	17.548	17.0674	17.8403	17.8231	17.67	F1SPS6	MST1	F1SPS6_PIG	Hepatocyte growth factor-like protein	0.997277	0.85373	-0.0344027	0.994939	0.92338	0.048262	0.994887	0.83184	0.191816	0.999977	0.81194	0.0826646	0.999961	0.85274	-0.226218	0.999999	0.86169	0.143554
185	I3L638	16.4065	17.3105	18.1698	17.4169	18.821	15.2103	17.1377	18.4319	14.3646	18.7499	17.8643	15.7125	15.6682	15.5183	19.0949	17.4671	17.3135	18.7351	17.631	17.7123	16.6316	17.8878	17.406	14.9602	I3L638	VTN	I3L638_PIG	Vitronectin	0.220037	0.65834	-0.179028	0.995958	0.92338	0.0770264	0.656403	0.83184	-0.184361	0.147741	0.42882	0.256054	0.029055	0.1571	0.00533343	0.77356	0.86169	-0.261387
186	A0A287B1U6;A0A5G2QRA1;F1SGY4	17.7188	17.6468	17.6961	17.74	17.6175	17.8155	17.4682	17.3171	17.6939	17.5717	17.1649	17.6149	17.3932	17.6631	17.5871	17.427	17.6309	17.4134	17.3854	17.1279	17.3193	17.3981	17.2526	17.3837	A0A287B1U6;A0A5G2QRA1;F1SGY4	NELL2	A0A287B1U6_PIG;A0A5G2QRA1_PIG;F1SGY4_PIG	Neural EGFL like 2	0.00587734	0.04713	-0.233984	0.0345384	0.30819	-0.186633	4.16248e-08	0	-0.394613	0.943837	0.81194	0.0473509	0.0692973	0.27428	0.160629	0.0104553	0.07875	-0.20798
187	F1SE30	17.498	18.5034	14.0506	17.6657	17.8977	13.9949	17.9642	18.0433	17.7176	17.7219	17.7381	17.8165	17.9728	17.7451	15.0107	16.5898	17.8117	17.7718	16.1659	18.0613	17.8838	17.7072	15.3324	18.3787	F1SE30	ANK1	F1SE30_PIG	Ankyrin 1	0.234751	0.69112	1.23186	0.716927	0.92338	0.548593	0.497379	0.83184	0.653149	0.847689	0.81194	-0.683267	0.974508	0.85274	0.578711	0.981163	0.86169	0.104556
188	A0A287A5G1;A0A287AA77;A0A287AAR4;A0A5G2QZX1;I3LVD5;Q6QAQ1	17.5088	17.4052	16.5181	16.9871	17.104	17.2257	17.4835	18.9685	18.6461	17.6322	19.254	17.124	17.3802	16.7557	17.3183	19.0386	16.8231	18.0464	17.2446	17.4592	17.5544	17.6096	17.3417	17.2337	A0A287A5G1;A0A287AA77;A0A287AAR4;A0A5G2QZX1;I3LVD5;Q6QAQ1	ACTG1;ACTG1;ACTB;ACTG1;ACTG1;ACTB	A0A287A5G1_PIG;A0A287AA77_PIG;A0A287AAR4_PIG;A0A5G2QZX1_PIG;I3LVD5_PIG;ACTB_PIG	Actin gamma 1;Actin gamma 1;Actin, cytoplasmic 1;Actin gamma 1;Actin gamma 1;Actin, cytoplasmic 1	0.00912917	0.06638	1.05992	0.625619	0.92338	0.43557	0.912295	0.83184	0.282414	0.223345	0.56077	-0.624354	0.0803787	0.30213	0.77751	0.952551	0.86169	-0.153156
189	A0A287AZ81;A0A5G2R840;F1S5J5	17.5355	16.6422	17.8637	17.0266	17.5722	17.3185	17.4111	15.3565	16.6178	17.0931	16.4258	17.1823	17.096	18.2342	18.3423	17.6623	17.6655	17.2265	17.3926	17.5426	17.2741	17.7272	17.7215	17.6079	A0A287AZ81;A0A5G2R840;F1S5J5	HABP2	A0A287AZ81_PIG;A0A5G2R840_PIG;F1S5J5_PIG	Hyaluronan binding protein 2	0.074633	0.31701	-0.645348	0.529717	0.92338	0.378015	0.900608	0.83184	0.217872	0.000962116	0.00654	1.02336	0.013008	0.08948	-0.863221	0.9174	0.86169	-0.160143
190	F1SFI4	17.8497	17.5671	17.6925	17.48	17.6428	18.0378	17.2521	17.2743	16.9115	17.7373	17.3662	17.6473	17.526	17.5574	17.5249	17.6584	17.444	17.4955	17.4469	17.2455	17.5258	17.5658	17.4992	17.5276	F1SFI4	KNG1	F1SFI4_PIG	Kininogen 1	0.00362538	0.0308	-0.346864	0.301897	0.92338	-0.177282	0.0888402	0.34498	-0.24319	0.352884	0.72737	0.169582	0.76725	0.85274	-0.103674	0.914098	0.86169	-0.0659079
191	A0A287AFQ4	16.8743	16.4659	17.7751	17.1974	17.2701	16.4609	17.6202	16.9591	17.1888	17.6892	17.1149	17.5684	17.4847	17.2332	17.4872	17.7732	17.5989	17.3112	17.7134	17.7286	17.4304	17.5595	17.6178	17.2525	A0A287AFQ4	C8G	A0A287AFQ4_PIG	Complement C8 gamma chain	0.164493	0.55376	0.349499	0.0382776	0.32584	0.474141	0.019707	0.10698	0.543117	0.925969	0.81194	0.124642	0.80946	0.85274	-0.193618	0.99126	0.86169	0.068976
192	F1S6Q3	17.7329	17.5727	17.1693	17.5379	17.3608	17.4199	17.4254	16.8848	17.4609	16.8014	17.3908	17.4395	17.2606	17.6008	17.2113	17.0497	17.572	17.3881	17.3085	17.2784	17.0921	17.3175	17.5826	17.2996	F1S6Q3	CILP2	F1S6Q3_PIG	Cartilage intermediate layer protein 2	0.294059	0.77394	-0.231778	0.802143	0.92338	-0.118516	0.504303	0.83184	-0.15246	0.825982	0.81194	0.113263	0.990439	0.85274	-0.0793187	0.950715	0.86169	-0.0339441
193	P51779	17.7593	17.479	17.185	17.2669	16.9563	17.6245	17.544	17.0417	17.4666	17.1193	17.3121	17.7759	17.6228	17.5716	17.2511	17.382	17.5724	17.4567	17.04	17.2026	17.303	17.2469	16.9905	17.6615	P51779	CFD	CFAD_PIG	Complement factor D	0.82359	0.85373	-0.00191087	0.767361	0.92338	0.0975872	0.234413	0.64042	-0.137754	0.99983	0.81194	0.099498	0.0576226	0.24247	0.135843	0.0224331	0.14148	-0.235342
194	A0A286ZYQ7	17.1838	17.002	18.4853	15.4947	16.2101	20.0148	15.5634	18.8446	19.0742	18.255	16.1705	14.5066	16.0099	16.7989	19.1833	19.9206	17.5501	19.1802	16.8949	17.7854	18.2654	18.7463	18.4733	19.1623	A0A286ZYQ7	NA	A0A286ZYQ7_PIG	Ig-like domain-containing protein	0.971666	0.85373	-0.329382	0.898524	0.92338	0.70873	0.93451	0.83184	0.822823	0.669637	0.81194	1.03811	0.738996	0.85274	-1.15221	0.999736	0.86169	0.114093
195	Q69DK8	17.5771	17.8879	17.285	17.8811	17.6187	17.7575	18.388	17.765	18.3332	18.1184	18.5595	18.1409	17.5031	17.4806	17.4704	17.5467	17.6097	18.0815	18.1462	18.4151	18.6731	18.479	17.9866	18.3127	Q69DK8	NA	C1S_PIG	Complement C1s subcomponent	0.000106617	0.00158	0.549617	0.972248	0.92338	-0.0525414	4.13654e-06	8e-05	0.667568	1.79084e-05	0.0002	-0.602158	0.846571	0.85274	-0.117952	1.50411e-07	1e-05	0.72011
196	A0A287A016;A0A287BE48	17.7787	17.3746	17.331	17.5928	17.1874	17.3872	17.6579	17.6318	17.9799	17.5127	17.8135	17.8808	17.601	17.5388	17.3323	17.1668	17.7241	17.2759	17.1548	17.4256	17.482	17.4718	17.7014	17.4181	A0A287A016;A0A287BE48	PLXDC2	A0A287A016_PIG;A0A287BE48_PIG	Plexin domain containing 2	3.139e-05	0.00055	0.304159	0.996926	0.92338	-0.00214719	0.735364	0.83184	0.000326711	1.63526e-05	0.00019	-0.306306	3.39696e-06	0.0001	0.303832	0.833137	0.86169	0.0024739
197	I3LJP2	17.3152	17.7468	17.3589	17.2887	17.2614	17.157	17.4401	17.0851	17.1972	17.2769	17.1391	17.1976	17.2657	17.4882	17.4262	17.1958	17.4826	17.582	17.232	17.1848	17.0973	17.1419	17.0518	17.1156	I3LJP2	SELENOP	I3LJP2_PIG	Uncharacterized protein	0.204262	0.62592	-0.132039	0.700883	0.92338	0.0520568	0.0585686	0.24906	-0.217457	0.0132633	0.06599	0.184096	0.928839	0.85274	0.085418	0.00148643	0.01629	-0.269514
198	A0A5G2QZ85;K7GL83;K7GP99	18.734	16.4977	17.7927	16.9489	16.878	17.8994	18.5165	20.719	18.943	20.7964	18.94	17.9742	17.9901	18.5916	18.3018	19.5915	15.5137	18.3908	20.6193	18.9091	16.2615	20.9321	18.6333	15.7823	A0A5G2QZ85;K7GL83;K7GP99	ILF3	A0A5G2QZ85_PIG;K7GL83_PIG;K7GP99_PIG	Interleukin enhancer binding factor 3	0.0710092	0.30771	1.85639	0.820976	0.92338	0.604801	0.429437	0.83184	1.06451	0.409626	0.79734	-1.25159	0.832141	0.85274	0.791887	0.904717	0.86169	0.459706
199	A0A287A2E8;A0A5G2QN46;F1SU88	17.3344	17.5193	17.4494	17.6757	17.317	17.2394	17.6392	17.4519	17.8434	17.6851	17.4463	17.5799	17.4802	17.4373	17.5239	17.2612	17.4143	16.9792	17.261	17.1956	17.3869	17.5263	17.6709	17.2636	A0A287A2E8;A0A5G2QN46;F1SU88	MERTK	A0A287A2E8_PIG;A0A5G2QN46_PIG;F1SU88_PIG	MER proto-oncogene, tyrosine kinase;MER proto-oncogene, tyrosine kinase;MER proto-oncogene, tyrosine kinase	0.13502	0.50588	0.185102	0.695119	0.92338	-0.0731918	0.798474	0.83184	-0.0384776	0.00658126	0.03627	-0.258294	0.0139118	0.093	0.22358	0.99861	0.86169	0.0347142
200	P14477	17.8707	17.5043	17.712	16.8378	17.0513	16.6415	18.2391	17.858	16.9997	18.2123	17.508	17.5313	17.5034	18.1974	17.2764	18.5663	18.0102	17.46	18.077	17.8109	19.0087	17.6262	18.0223	18.6678	P14477	FGB	FIBB_PIG	Fibrinogen beta chain (Fragment)	0.253847	0.70519	0.45512	0.0864305	0.52385	0.565997	0.00055013	0.0059	0.932555	0.963408	0.81194	0.110877	0.18257	0.49988	-0.477435	0.335494	0.86169	0.366558
201	A0A5G2QB32;A0A5G2QPE1;I3LQD3	16.2563	23.4537	16.1472	16.8018	16.0023	23.9637	17.0475	17.0376	20.4131	16.0086	16.9411	17.1047	17.2819	19.4943	21.1379	16.5167	16.759	17.1083	21.5771	16.5838	16.9026	16.2284	18.6058	20.3586	A0A5G2QB32;A0A5G2QPE1;I3LQD3	CAPN2	A0A5G2QB32_PIG;A0A5G2QPE1_PIG;I3LQD3_PIG	Calpain-2 catalytic subunit	0.738846	0.85373	-1.34537	0.960792	0.92338	-0.721114	0.997412	0.83184	-0.394759	0.95493	0.81194	0.624258	0.857805	0.85274	-0.950612	0.991175	0.86169	0.326354
202	I3LQH7	17.294	18.1727	17.3186	18.0794	17.55	17.5878	17.7804	18.1577	17.9305	18.1079	17.5349	17.5417	18.3301	18.5328	18.187	19.9969	18.5704	18.3751	17.515	17.5219	17.0982	17.6974	17.2429	17.712	I3LQH7	BLVRB	I3LQH7_PIG	Biliverdin reductase B	0.799087	0.85373	0.175081	2.10219e-05	0.00108	0.998293	0.64257	0.83184	-0.202524	0.00161735	0.01023	0.823212	0.192649	0.52241	0.377605	1.67473e-07	1e-05	-1.20082
203	A0A286ZPI8;A0A287B6Q2	17.1886	17.5901	17.1531	17.1646	16.9538	17.782	17.6611	17.1676	17.6751	17.5175	17.4601	17.9156	17.6588	17.7883	17.1557	17.3082	17.6853	17.1291	17.4811	16.794	17.2157	17.3178	17.6205	17.4209	A0A286ZPI8;A0A287B6Q2	CD55	A0A286ZPI8_PIG;A0A287B6Q2_PIG	Uncharacterized protein	0.0314969	0.1689	0.260798	0.600529	0.92338	0.148877	0.904718	0.83184	0.0029791	0.430027	0.81194	-0.111921	0.0103541	0.07784	0.257819	0.228581	0.73175	-0.145898
204	A0A5G2Q8S2;F1S9J3;I3LDA4	18.1831	17.1476	17.0224	17.0076	17.0041	16.9634	17.6914	17.4379	17.2362	17.2186	17.6323	17.6257	17.2156	17.4919	16.9806	17.0408	17.357	17.0684	17.02	17.4419	17.3802	17.5184	17.0609	17.2908	A0A5G2Q8S2;F1S9J3;I3LDA4	PXDN	A0A5G2Q8S2_PIG;F1S9J3_PIG;I3LDA4_PIG	Peroxidasin	0.0458679	0.22817	0.252322	0.999793	0.92338	-0.0289779	0.935154	0.83184	0.064009	0.0393959	0.1553	-0.2813	0.275324	0.62649	0.188313	0.903975	0.86169	0.0929869
205	A0A286ZTA4;A0A286ZZC9;A0A5G2RHD6	18.6428	18.2828	17.4954	17.434	17.7444	17.5616	17.291	15.6265	17.9744	16.6371	16.9742	19.1682	18.4008	18.6466	16.9106	16.9652	18.4266	16.8724	17.5743	17.1817	17.5914	17.7093	18.0688	16.588	A0A286ZTA4;A0A286ZZC9;A0A5G2RHD6	ALDOB	A0A286ZTA4_PIG;A0A286ZZC9_PIG;A0A5G2RHD6_PIG	Fructose-bisphosphate aldolase	0.911742	0.85373	-0.58158	0.99104	0.92338	-0.156458	0.304549	0.76001	-0.407918	0.982628	0.81194	0.425122	0.748406	0.85274	-0.173662	0.44699	0.86169	-0.251461
206	P15468	17.343	17.5068	17.3322	17.0832	17.0345	16.8487	17.2403	16.8569	16.7052	16.9301	16.845	17.0987	17.1727	17.5879	17.4355	17.4723	16.9536	17.5522	17.47	17.2209	17.428	17.0992	16.615	16.6845	P15468	RNASE4	RNAS4_PIG	Ribonuclease 4	0.172289	0.56638	-0.245383	0.272065	0.92338	0.170941	0.999781	0.83184	-0.105157	0.000721207	0.00512	0.416324	0.230017	0.5655	-0.140226	0.232541	0.73497	-0.276098
207	A2SW51	17.0883	17.1894	17.347	17.2313	17.1606	17.1976	17.1586	17.2786	17.4857	17.7357	17.72	17.4679	17.0754	17.3332	17.0789	17.4073	17.3244	17.0092	17.391	17.7243	17.8228	17.6536	17.8899	17.6563	A2SW51	CD14	A2SW51_PIG	Monocyte differentiation antigen CD14	0.00109456	0.01118	0.272085	0.973347	0.92338	0.00237536	9.6436e-08	0	0.48729	0.000340979	0.0026	-0.26971	0.203708	0.52902	-0.215205	1.10483e-08	0	0.484915
208	A0A286ZWS8	17.1962	16.8949	16.4767	17.2643	16.9496	17.3875	16.4829	16.7813	17.2884	16.1975	17.4642	16.6443	16.837	17.0134	16.5501	16.6466	16.9007	17.4978	16.5678	16.3959	17.3103	16.8455	16.7076	16.6736	A0A286ZWS8	COL2A1	A0A286ZWS8_PIG	Collagen type II alpha 1 chain	0.679526	0.85373	-0.218428	0.925819	0.92338	-0.120598	0.503384	0.83184	-0.278069	0.961877	0.81194	0.0978293	0.989512	0.85274	0.0596411	0.851355	0.86169	-0.15747
209	F1S788	17.4652	16.6901	17.3444	16.5406	17.1972	16.6963	17.4654	16.7859	16.8725	17.2995	17.0317	17.3507	17.0138	17.2399	17.3536	17.2451	17.1402	17.1939	17.3957	17.3241	17.806	17.1636	17.3155	17.3895	F1S788	C8A	F1S788_PIG	Complement C8 alpha chain	0.729152	0.85373	0.145334	0.251372	0.92338	0.208782	0.000293612	0.00365	0.410094	0.872239	0.81194	0.0634482	0.0251855	0.14389	-0.26476	0.0895251	0.37819	0.201312
210	A0A287A4X6;A0A5G2QL34;A0A5G2QTJ9;I3LU56	17.2812	17.2619	17.048	17.0798	16.9618	17.0213	17.4914	17.4278	17.2914	17.4866	17.5139	17.549	16.5029	16.9978	17.3081	16.5819	16.9836	17.3565	16.8238	16.9158	17.1184	17.2245	16.892	16.9167	A0A287A4X6;A0A5G2QL34;A0A5G2QTJ9;I3LU56	ICOSLG	A0A287A4X6_PIG;A0A5G2QL34_PIG;A0A5G2QTJ9_PIG;I3LU56_PIG	Ig-like domain-containing protein	0.00692974	0.05357	0.350997	0.544612	0.92338	-0.15391	0.900894	0.83184	-0.127154	3.12361e-05	0.00033	-0.504907	0.00117348	0.01523	0.478151	0.929932	0.86169	0.0267564
211	A0A286ZP75;A0A287BK77;A0A5G2RBH0;F1SJL1;I3LTZ7	16.911	17.3166	17.432	17.2205	17.2588	17.0535	17.1355	16.9976	17.1774	17.1239	17.1811	16.9918	17.2151	16.8972	17.2549	16.9524	17.2747	17.4017	17.2627	17.3699	16.5026	17.123	17.2075	16.9401	A0A286ZP75;A0A287BK77;A0A5G2RBH0;F1SJL1;I3LTZ7	IGDCC4	A0A286ZP75_PIG;A0A287BK77_PIG;A0A5G2RBH0_PIG;F1SJL1_PIG;I3LTZ7_PIG	Immunoglobulin superfamily DCC subclass member 4	0.0671822	0.2926	-0.0975364	0.987869	0.92338	-0.0327498	0.667066	0.83184	-0.131089	0.146816	0.42882	0.0647866	0.653448	0.85274	0.0335529	0.834501	0.86169	-0.0983395
212	A0A287B3W6;A0A5G2RGR8;I3LFP1	17.2015	17.1854	17.8229	16.8628	17.5707	16.9871	17.8264	17.5075	17.4227	17.5907	17.9121	17.5244	16.56	17.8606	17.4669	17.1103	16.6742	16.9067	17.5848	17.3523	16.789	17.1525	16.2951	16.9511	A0A287B3W6;A0A5G2RGR8;I3LFP1	LOC100739735	A0A287B3W6_PIG;A0A5G2RGR8_PIG;I3LFP1_PIG	Peptidase S1 domain-containing protein	0.322484	0.82104	0.358909	0.887222	0.92338	-0.175269	0.905982	0.83184	-0.250923	0.076503	0.25903	-0.534179	0.109034	0.35939	0.609833	0.999995	0.86169	-0.0756542
213	F1RZ89	17.1621	17.7311	16.88	16.8376	16.957	17.2284	17.1043	16.8047	16.7326	17.3722	17.37	16.6757	17.2504	16.7825	17.4002	17.2145	17.0275	17.4926	16.9163	17.1305	17.3242	17.7939	17.0911	16.1302	F1RZ89	SGSH	F1RZ89_PIG	N-sulfoglucosamine sulfohydrolase	0.927293	0.85373	-0.122794	0.993367	0.92338	0.0618903	0.976453	0.83184	-0.0683491	0.816839	0.81194	0.184684	0.997775	0.85274	-0.0544444	0.90166	0.86169	-0.130239
214	A0A5G2R080	15.3164	15.9881	17.8434	18.4725	17.5653	16.9728	18.5405	18.251	18.1839	18.7512	16.6696	15.6309	17.5598	16.3911	17.4807	17.2466	17.6825	16.4366	18.8245	19.5104	16.159	15.1427	19.3427	15.2953	A0A5G2R080	ITIH2	A0A5G2R080_PIG	Inter-alpha-trypsin inhibitor heavy chain H2	0.799861	0.85373	0.644765	0.999996	0.92338	0.106486	0.995389	0.83184	0.352691	0.815669	0.81194	-0.53828	0.917117	0.85274	0.292074	0.996324	0.86169	0.246205
215	A0A286ZLN2	16.7041	18.0377	17.3688	16.2314	17.5663	16.5625	17.6293	17.3447	16.6923	17.5942	18.0444	17.1225	17.4031	17.0601	17.093	17.5801	16.405	17.8078	17.6573	16.439	15.9007	17.0245	16.419	17.2044	A0A286ZLN2	FBLN1	A0A286ZLN2_PIG	Fibulin-1	0.934555	0.85373	0.326118	0.782344	0.92338	0.146392	0.999199	0.83184	-0.304294	0.98849	0.81194	-0.179726	0.914011	0.85274	0.630412	0.721757	0.86169	-0.450687
216	A0A287ALH4;A0A287AQG0;A0A287B901;A0A2C9F3C8;K7GNA9;K7GPI3;K7GS31;Q95242	17.3135	16.965	16.7755	17.0342	16.6783	16.9242	17.5074	17.2462	17.6717	17.1007	17.3621	17.5079	17.0598	17.0198	17.0113	16.8006	17.1313	17.0638	16.8549	16.7526	16.9021	17.2162	17.2065	16.8304	A0A287ALH4;A0A287AQG0;A0A287B901;A0A2C9F3C8;K7GNA9;K7GPI3;K7GS31;Q95242	PECAM1	A0A287ALH4_PIG;A0A287AQG0_PIG;A0A287B901_PIG;A0A2C9F3C8_PIG;K7GNA9_PIG;K7GPI3_PIG;K7GS31_PIG;PECA1_PIG	Platelet endothelial cell adhesion molecule	4.00568e-06	9e-05	0.450893	0.880919	0.92338	0.0659768	0.999891	0.83184	0.0119801	0.000180055	0.00155	-0.384916	1.74593e-05	0.00039	0.438913	0.856503	0.86169	-0.0539967
217	A0A287BAM0;A0A287BBR1;A0A2C9F3F8;Q29243	16.6528	17.206	17.2793	16.4584	17.4382	16.5039	17.7967	17.4184	16.6967	16.9761	17.5772	17.2653	16.9248	16.6725	17.5323	16.9736	16.2233	17.5682	17.3203	17.1747	17.0818	17.6156	15.8032	16.5024	A0A287BAM0;A0A287BBR1;A0A2C9F3F8;Q29243	DAG1	A0A287BAM0_PIG;A0A287BBR1_PIG;A0A2C9F3F8_PIG;DAG1_PIG	Dystroglycan	0.789065	0.85373	0.365319	0.954265	0.92338	0.0593576	0.686365	0.83184	-0.00675968	0.975421	0.81194	-0.305962	0.997811	0.85274	0.372079	0.925367	0.86169	-0.0661173
218	F1SUE2	17.01	17.7799	17.3331	17.3139	17.4099	17.512	17.4528	17.1067	17.4805	17.5604	17.2487	17.6675	17.4038	17.3822	17.5191	17.1428	17.2563	17.2186	17.2073	17.2388	17.6219	17.0792	16.9421	16.9144	F1SUE2	OMD	F1SUE2_PIG	Osteomodulin	0.995888	0.85373	0.0262697	0.923904	0.92338	-0.0726765	0.229615	0.63562	-0.225879	0.830162	0.81194	-0.0989463	0.147978	0.4358	0.252148	0.553123	0.86169	-0.153202
219	I3LVL5	16.8723	17.2615	16.9371	17.2611	16.9785	16.7444	18.1934	17.5982	17.931	17.6107	17.9476	18.1466	16.9767	17.0131	16.9583	16.6631	17.0574	17.0738	17.1401	17.2978	17.5602	17.7663	17.4687	17.0735	I3LVL5	CRISP3	I3LVL5_PIG	Cysteine rich secretory protein 3	5.81757e-14	0	0.895424	0.982089	0.92338	-0.0520969	0.00716154	0.0479	0.375261	5.32907e-15	0	-0.947521	0.000157361	0.00287	0.520163	0.00153793	0.01665	0.427358
220	A0A5G2QUQ4;Q6YT39	17.3946	17.0186	17.3018	17.2442	17.0959	16.6367	17.5608	16.8726	17.7302	17.128	18.1905	17.3398	16.5279	17.8894	16.7024	16.2615	15.6393	16.631	17.2144	17.3842	17.9936	16.6528	17.3034	16.8532	A0A5G2QUQ4;Q6YT39	LTF	A0A5G2QUQ4_PIG;Q6YT39_PIG	Lactotransferrin	0.248091	0.70253	0.354992	0.0935237	0.54254	-0.506738	0.856251	0.83184	0.118288	0.000272481	0.00218	-0.86173	0.785725	0.85274	0.236704	0.0116359	0.08613	0.625026
221	A0A287BEY3	17.1642	17.2117	16.7008	17.1749	16.8532	17.0825	16.1303	16.3387	15.8689	15.2927	16.1731	16.1884	17.8098	17.3888	17.4363	17.3091	17.6254	17.5367	16.4458	16.4084	16.2754	15.9783	16.352	15.9848	A0A287BEY3	LOC100624077	A0A287BEY3_PIG	Endogenous retrovirus group V member 2 Env polyprotein	8.88178e-16	0	-1.03252	0.000305923	0.00887	0.486494	6.51411e-08	0	-0.790402	0	0	1.51901	0.103166	0.35252	-0.242119	0	0	-1.2769
222	A0A5G2QN76	17.0292	17.2	16.8296	17.2175	16.8417	17.041	17.1852	17.1407	17.4792	16.8139	16.9143	17.142	16.8357	16.7882	17.0189	16.608	17.2535	16.9595	16.8611	17.0666	16.9441	17.0786	16.9985	17.0624	A0A5G2QN76	CD44	A0A5G2QN76_PIG	CD44 molecule (Indian blood group)	0.704638	0.85373	0.0860465	0.607707	0.92338	-0.11586	0.955329	0.83184	-0.0246325	0.102718	0.3187	-0.201906	0.435451	0.81303	0.110679	0.902771	0.86169	0.0912272
223	A0A287AVP6;A0A287B3X4	17.8017	16.5579	16.7109	16.8866	16.6198	17.575	17.1952	16.8928	17.1414	17.0396	17.1367	18.0688	17.0199	17.0566	16.7971	16.4019	16.4276	17.1073	16.7451	17.2318	17.6316	17.3545	16.6182	16.7108	A0A287AVP6;A0A287B3X4	DLK1	A0A287AVP6_PIG;A0A287B3X4_PIG	Delta like non-canonical Notch ligand 1	0.41834	0.85373	0.220425	0.714572	0.92338	-0.223561	1	0.83184	0.0233546	0.0537297	0.19839	-0.443986	0.508607	0.85274	0.19707	0.728795	0.86169	0.246916
224	F1RT17	15.416	17.9715	16.7922	17.8287	17.84	18.5546	16.3209	16.5631	17.4239	16.9565	17.7797	16.7703	17.9443	18.4471	16.8059	17.3466	17.4368	17.8192	15.998	17.4435	17.2303	17.5061	16.4862	18.0157	F1RT17	AGA	F1RT17_PIG	N(4)-(Beta-N-acetylglucosaminyl)-L-asparaginase	0.690141	0.85373	-0.431412	0.978735	0.92338	0.232843	0.700358	0.83184	-0.287217	0.444913	0.81194	0.664255	0.999998	0.85274	-0.144196	0.434255	0.86169	-0.520059
225	I3LLD2	17.0287	17.3714	17.0554	17.2622	16.8783	16.8224	16.8463	16.7067	16.7515	16.9626	17.0081	17.5897	17.1543	17.3781	16.868	16.9228	16.6509	17.0953	17.0942	16.9095	16.218	17.2011	17.0857	16.5243	I3LLD2	OLFM1	I3LLD2_PIG	Noelin isoform 4	0.955293	0.85373	-0.0922475	0.998704	0.92338	-0.058146	0.587678	0.83184	-0.23091	0.984	0.81194	0.0341015	0.883151	0.85274	0.138662	0.666991	0.86169	-0.172764
226	A0A287A826;A0A287AWN4;F1SS80	17.044	16.9084	17.1174	17.2272	16.9194	17.2283	17.095	16.8796	17.0521	17.0169	16.9693	16.7386	16.6304	17.2235	17.1456	16.2644	17.0255	17.0191	16.8476	16.9152	16.89	17.0149	16.9388	16.814	A0A287A826;A0A287AWN4;F1SS80	ADAMTSL4	A0A287A826_PIG;A0A287AWN4_PIG;F1SS80_PIG	ADAMTS like 4	0.722999	0.85373	-0.115524	0.309779	0.92338	-0.189355	0.407291	0.83184	-0.170698	0.900897	0.81194	-0.0738309	0.9498	0.85274	0.0551736	0.999028	0.86169	0.0186573
227	A0A075B7I6	16.7234	18.205	16.1542	16.9946	16.6371	17.1748	17.2452	16.0451	16.6514	16.8017	15.9986	17.3263	17.8938	17.6015	16.6824	17.2683	17.3829	15.7059	16.7572	17.1178	17.3501	16.4883	17.3948	16.3638	A0A075B7I6	NA	A0A075B7I6_PIG	Ig-like domain-containing protein	0.993255	0.85373	-0.303482	0.971164	0.92338	0.107591	0.781244	0.83184	-0.0695202	0.899863	0.81194	0.411073	0.922323	0.85274	-0.233962	0.505006	0.86169	-0.177111
228	F1S1D2	16.8905	16.513	16.8445	16.4473	16.7202	15.8835	16.5085	14.4638	16.5999	15.8537	16.3732	16.2459	17.1267	17.5258	16.3178	17.2355	16.2267	17.2713	17.1719	16.3022	17.0216	16.1558	17.1993	16.7103	F1S1D2	CTHRC1	F1S1D2_PIG	Collagen triple helix repeat containing 1	0.249543	0.70253	-0.54229	0.459417	0.92338	0.400829	0.802389	0.83184	0.210372	0.0055075	0.03099	0.943119	0.03528	0.17578	-0.752662	0.949713	0.86169	-0.190457
229	A0A287BF94;A0A5S6GR81;A1E295	16.7158	16.5146	17.1751	16.9768	16.9154	16.6502	17.3867	17.4703	16.468	17.6149	17.2852	17.0597	16.5265	17.0181	17.0439	17.0293	17.2979	17.1914	16.9101	17.0538	17.2026	17.1328	17.167	16.663	A0A287BF94;A0A5S6GR81;A1E295	CTSB	A0A287BF94_PIG;A0A5S6GR81_PIG;CATB_PIG	Cathepsin B	0.0966625	0.38575	0.389475	0.4769	0.92338	0.193221	0.1407	0.45282	0.196892	0.805993	0.81194	-0.196255	0.999583	0.85274	0.192583	0.860894	0.86169	0.00367194
230	A0A287BDF0;A0A287BPT7;F1SFM5	17.0553	16.7039	16.9635	16.9929	16.6851	17.1791	16.7045	16.9619	17.3304	16.9952	16.8661	16.9478	16.9786	17.25	17.2344	16.8298	17.2488	17.0159	16.9601	16.7879	16.8423	17.0072	17.2192	16.8988	A0A287BDF0;A0A287BPT7;F1SFM5	CNTN3	A0A287BDF0_PIG;A0A287BPT7_PIG;F1SFM5_PIG	Contactin 3;Contactin 3;Contactin-3	0.977452	0.85373	0.0376968	0.406753	0.92338	0.162975	0.999185	0.83184	0.0226438	0.659033	0.81194	0.125278	0.953115	0.85274	0.015053	0.33096	0.86169	-0.140331
231	A0A286ZI83;A0A286ZPA0	17.4133	17.1712	16.9129	17.052	16.9971	16.269	16.8711	16.564	17.3923	16.6621	16.6529	16.7739	16.8022	17.1793	16.5324	16.483	15.9591	16.1254	16.7232	15.9381	17.036	16.6681	17.2101	16.3389	A0A286ZI83;A0A286ZPA0	LOC100520329	A0A286ZI83_PIG;A0A286ZPA0_PIG	Amine oxidase	0.974718	0.85373	-0.149898	0.115028	0.61085	-0.455706	0.442138	0.83184	-0.316899	0.29479	0.66819	-0.305809	0.740057	0.85274	0.167001	0.913124	0.86169	0.138807
232	A0A287AAI1	17.2985	17.5906	16.6762	17.1312	16.8704	16.6501	16.8386	16.8041	17.1552	16.9663	17.101	16.6376	16.6131	17.1948	16.7013	16.5146	17.2598	16.9403	16.7206	16.643	16.1588	16.3585	16.7691	16.492	A0A287AAI1	CLEC11A	A0A287AAI1_PIG	C-type lectin domain containing 11A	0.845943	0.85373	-0.119014	0.772675	0.92338	-0.165511	0.0110887	0.06918	-0.512487	0.998856	0.81194	-0.0464961	0.100427	0.35129	0.393473	0.124133	0.49012	-0.346977
233	F1S574;I3LSA5;P00690	15.5102	16.9839	16.9829	16.9479	17.3566	17.1152	16.9309	17.1712	16.3618	16.2505	17.6343	16.5412	16.3743	16.8226	17.0721	16.5037	17.117	17.259	16.1883	16.869	17.3498	17.2331	16.8788	16.7842	F1S574;I3LSA5;P00690	AMY2;LOC100153446;AMY2	F1S574_PIG;I3LSA5_PIG;AMYP_PIG	Alpha-amylase;Alpha-amylase;Pancreatic alpha-amylase	0.988183	0.85373	-0.00115811	0.99991	0.92338	0.0419706	0.982543	0.83184	0.06773	0.980729	0.81194	0.0431287	0.913811	0.85274	-0.0688881	0.988991	0.86169	0.0257594
234	F1RPW2	16.8739	16.7564	17.2624	16.4068	16.6783	15.3327	16.6558	16.3763	15.5007	15.5625	16.1683	16.6751	17.0583	17.3786	17.3943	17.3803	17.0655	16.9224	17.1122	16.8391	16.8527	16.585	16.8525	16.813	F1RPW2	F5	F1RPW2_PIG	Coagulation factor V	0.220213	0.65834	-0.395307	0.00326704	0.05226	0.648134	0.190769	0.56156	0.290652	3.3694e-07	1e-05	1.04344	0.000667327	0.00969	-0.685959	0.498823	0.86169	-0.357482
235	A0A5G2R5Z3;F1SAG9;K7GKE2;K7GP49	17.2617	17.0743	16.9782	17.1678	16.9066	17.0755	17.1297	16.8866	17.1242	17.0276	16.9647	16.9387	16.8056	16.8512	16.8169	16.6901	16.8943	17.0544	16.771	16.7845	16.6123	16.773	16.947	16.8902	A0A5G2R5Z3;F1SAG9;K7GKE2;K7GP49	MCAM	A0A5G2R5Z3_PIG;F1SAG9_PIG;K7GKE2_PIG;K7GP49_PIG	Melanoma cell adhesion molecule	0.706223	0.85373	-0.0654478	0.00204661	0.03453	-0.225265	7.14938e-05	0.00107	-0.281022	0.0534659	0.19839	-0.159817	0.00504312	0.04694	0.215574	0.829917	0.86169	-0.0557576
236	F1SM14	0	16.1763	17.0354	16.2785	17.0487	16.8733	12.0743	12.1965	0	16.6816	16.7992	17.0932	16.9382	0	8.79053	17.2285	17.0757	17.2462	17.3232	7.23608	17.8089	0	17.3824	17.464	F1SM14	SPP2	F1SM14_PIG	Secreted phosphoprotein 24	0.979997	0.85373	-1.42786	0.985124	0.92338	-1.02216	0.975187	0.83184	-1.03292	0.999985	0.81194	0.405698	0.999973	0.85274	-0.39494	0.999831	0.86169	-0.0107579
237	F1RVE7;K7GQ83;K7GS94;Q9GLP0	17.107	17.1312	16.9098	17.2605	16.905	17.16	17.0481	17.0185	17.2796	16.9263	16.696	17.0477	16.8322	16.8608	16.9664	17.0845	17.12	16.9388	16.9807	16.9753	16.6825	16.9846	17.0379	16.7175	F1RVE7;K7GQ83;K7GS94;Q9GLP0	ITGB1	F1RVE7_PIG;K7GQ83_PIG;K7GS94_PIG;ITB1_PIG	Integrin beta;Integrin beta;Integrin beta;Integrin beta-1	0.918494	0.85373	-0.07624	0.370029	0.92338	-0.111796	0.00546465	0.03938	-0.182517	0.791729	0.81194	-0.0355556	0.0627285	0.25722	0.106277	0.268831	0.79607	-0.0707216
238	F1SGS9	18.0228	17.3415	16.7275	16.7543	16.9135	17.0167	17.0219	17.7514	17.6638	17.1915	16.9341	17.2265	19.024	17.2624	17.2546	18.6186	17.4205	17.5227	17.243	17.2786	17.0263	16.8734	16.4517	17.0665	F1SGS9	CAT	F1SGS9_PIG	Catalase	0.876211	0.85373	0.168802	0.0283765	0.27376	0.721067	0.947052	0.83184	-0.139494	0.186326	0.4985	0.552265	0.595028	0.85274	0.308296	0.00525587	0.04598	-0.860561
239	A0A287AT36;A0A5G2QNM7;F1S790	16.5062	16.4722	17.3282	16.4258	17.122	16.4665	16.846	16.5794	16.2061	17.1065	16.6286	16.7944	16.5608	17.0886	17.3636	16.9976	16.9533	17.0694	17.1232	17.2897	17.474	16.6561	17.0813	16.5105	A0A287AT36;A0A5G2QNM7;F1S790	C8B	A0A287AT36_PIG;A0A5G2QNM7_PIG;F1S790_PIG	MACPF domain-containing protein	0.829789	0.85373	-0.026644	0.19453	0.81134	0.285386	0.0192029	0.10562	0.302318	0.0296759	0.12881	0.31203	0.00312655	0.03268	-0.328962	0.729958	0.86169	0.016932
240	F1RRU7	17.1016	16.89	16.5227	17.2303	16.7071	17.449	16.6117	16.9086	17.3384	16.7513	17.4249	16.5648	16.6257	16.6902	16.7662	16.2438	16.6595	16.8709	16.3787	16.5263	16.5338	16.6378	16.8165	16.6523	F1RRU7	MRC2	F1RRU7_PIG	Mannose receptor C type 2	0.98483	0.85373	-0.0501641	0.0475819	0.36797	-0.340733	0.0111907	0.0693	-0.392562	0.113618	0.34724	-0.290569	0.0312626	0.16238	0.342398	0.942079	0.86169	-0.0518288
241	F6PVY0	16.7141	17.1801	17.2566	15.7461	16.4341	15.9464	16.9385	16.704	15.6825	16.3176	16.9811	17.8157	17.8129	16.6955	16.0907	16.7153	16.4319	17.1985	16.7079	16.1506	16.9842	16.8785	16.469	16.801	F6PVY0	FABP5	F6PVY0_PIG	FABP domain-containing protein	0.905108	0.85373	0.19365	0.617068	0.92338	0.27789	0.809943	0.83184	0.118957	0.948781	0.81194	0.0842402	0.995596	0.85274	0.074692	0.99024	0.86169	-0.158932
242	A0A286ZJ21;A0A287ADL0;I3LEW0	17.2025	16.9531	16.9932	16.8296	16.9196	17.1232	16.7237	16.7212	16.6636	16.632	16.425	16.7702	16.8247	17.1647	16.6652	16.5948	16.9055	16.5136	16.3926	16.5339	16.605	16.4567	16.5268	16.2827	A0A286ZJ21;A0A287ADL0;I3LEW0	COLEC11	A0A286ZJ21_PIG;A0A287ADL0_PIG;I3LEW0_PIG	Collectin subfamily member 11	0.000150469	0.00208	-0.347601	0.00492024	0.07364	-0.225455	2.33147e-15	0	-0.537241	0.788973	0.81194	0.122146	0.0017173	0.01989	0.18964	3.3825e-06	0.0001	-0.311786
243	P80928	16.9184	17.1246	16.5477	16.9306	17.0258	16.9995	16.8511	18.0106	17.4423	17.2016	17.5837	16.4666	17.4463	17.1449	17.4373	18.2916	17.4022	17.8112	16.6795	16.798	16.4666	16.7227	16.6774	16.5128	P80928	MIF	MIF_PIG	Macrophage migration inhibitory factor	0.287686	0.76419	0.334903	0.00332253	0.05226	0.664489	0.404704	0.83184	-0.281566	0.339083	0.71065	0.329586	0.00603219	0.05442	0.616469	3.63163e-06	0.0001	-0.946056
244	F1RFU7	17.5617	16.7848	16.8767	16.9161	16.3871	16.5527	17.1013	16.5269	16.8971	16.5691	16.9133	17.2323	16.6107	16.8051	16.3306	16.4783	15.9852	16.6559	15.326	16.5048	17.2352	16.7395	16.2219	16.4021	F1RFU7	CDH11	F1RFU7_PIG	Cadherin 11	0.877097	0.85373	0.0268049	0.139835	0.67237	-0.368874	0.0488874	0.21973	-0.441603	0.026868	0.11851	-0.395679	0.0130817	0.08948	0.468407	0.945102	0.86169	-0.0727288
245	A0A287AGA0;A0A5G2QEF6;A0A5G2R2Y0;A0A5G2R964;A0A5G2RMX9;F1SLW6	17.7114	16.9493	16.8095	17.2026	16.6351	17.5544	17.3648	17.0098	17.0181	16.7749	17.059	17.6391	16.9404	17.1032	16.7096	16.4712	16.9283	16.8194	16.9115	17.0425	17.0407	16.8523	16.5089	16.9757	A0A287AGA0;A0A5G2QEF6;A0A5G2R2Y0;A0A5G2R964;A0A5G2RMX9;F1SLW6	MFAP5	A0A287AGA0_PIG;A0A5G2QEF6_PIG;A0A5G2R2Y0_PIG;A0A5G2R964_PIG;A0A5G2RMX9_PIG;F1SLW6_PIG	Microfibril associated protein 5	0.855671	0.85373	0.000550095	0.115192	0.61085	-0.315086	0.149499	0.4681	-0.255173	0.0171612	0.08142	-0.315637	0.0384324	0.18714	0.255723	1	0.86169	0.0599131
246	A0A287B863;F1SKR0	16.5264	17.1974	16.7807	17.1937	16.8929	16.8571	16.7731	17.2518	18.5165	16.4937	18.0399	16.8174	17.1687	16.4396	16.9764	16.6208	16.9447	16.4979	16.7166	16.4038	16.5581	16.5386	16.6085	16.4521	A0A287B863;F1SKR0	ACAN	A0A287B863_PIG;F1SKR0_PIG	Aggrecan core protein	0.249734	0.70253	0.407362	0.834801	0.92338	-0.133347	0.165426	0.51221	-0.36176	0.0373897	0.15075	-0.540709	0.000547823	0.00824	0.769121	0.582394	0.86169	-0.228413
247	I3LK29	16.4572	16.6256	16.976	16.6983	16.9141	16.7481	16.732	16.6458	16.5075	16.5976	16.2436	16.4844	16.2554	16.6829	16.8377	16.9533	16.8421	16.5259	16.8057	17.0352	16.7737	17.0682	16.8666	16.8257	I3LK29	LCAT	I3LK29_PIG	Phosphatidylcholine-sterol acyltransferase	0.184719	0.587	-0.201389	0.933352	0.92338	-0.0536655	0.490991	0.83184	0.159287	0.501283	0.81194	0.147724	0.0045247	0.04261	-0.360676	0.172428	0.61198	0.212952
248	F1S5Q6	16.8608	16.725	16.9583	16.7619	16.7809	16.6274	16.9774	16.8973	16.9881	17.0107	16.5148	16.9037	16.5403	16.2989	16.9788	16.8998	17.0428	16.5441	16.7342	16.9762	16.6758	16.9683	16.6182	16.7599	F1S5Q6	FLT4	F1S5Q6_PIG	Fms related tyrosine kinase 4	0.779768	0.85373	0.0962531	0.842782	0.92338	-0.0682841	0.992246	0.83184	0.00303615	0.291142	0.66447	-0.164537	0.627835	0.85274	0.093217	0.950038	0.86169	0.0713203
249	I3LKV5	16.9725	16.785	17.1111	16.9402	17.0157	17.0145	16.8426	17.0429	17.0724	16.6179	16.854	16.0092	16.5654	16.8719	16.7512	16.2719	16.8907	16.9181	16.1468	16.0529	16.0611	16.2162	16.3849	16.6926	I3LKV5	ADAMTS13	I3LKV5_PIG	ADAM metallopeptidase with thrombospondin type 1 motif 13	0.351025	0.84811	-0.233328	0.235248	0.89106	-0.261637	2.50998e-06	6e-05	-0.714076	0.99468	0.81194	-0.0283088	0.00401643	0.03868	0.480748	0.00681341	0.05619	-0.452439
250	F1S567	16.9208	16.969	16.9588	16.5987	16.5535	16.7031	17.4327	17.3752	17.3289	17.6458	17.6792	17.4651	16.7101	16.6081	16.7994	16.3168	17.3742	16.7086	16.9018	17.1094	17.3044	17.2348	17.1899	17.1493	F1S567	VCAM1	F1S567_PIG	Uncharacterized protein	1.5938e-09	0	0.703826	0.974477	0.92338	-0.0311171	0.0245423	0.12587	0.364274	1.02457e-10	0	-0.734943	0.00747557	0.06343	0.339552	0.00513144	0.04581	0.395391
251	D5L7X3	17.1179	15.0704	15.6136	17.3661	16.0019	17.1926	15.2463	16.6575	15.1896	16.7756	16.7116	15.2065	17.1241	15.9869	17.2663	15.9739	16.8614	15.8654	16.842	16.7013	17.0092	17.0064	16.9734	17.0144	D5L7X3	MASP1	D5L7X3_PIG	Complement component MASP	0.588668	0.85373	-0.429239	0.999912	0.92338	0.119249	0.775869	0.83184	0.530676	0.555046	0.81194	0.548488	0.130311	0.39885	-0.959915	0.797792	0.86169	0.411427
252	K7GRK7	16.9546	16.6855	16.7468	16.8459	16.9339	17.1083	16.4774	16.5036	16.6274	16.6342	17.174	16.7364	16.545	16.8514	16.7873	16.2827	16.7092	16.9945	16.3662	16.6126	16.6143	16.5472	16.6512	16.3526	K7GRK7	TNXB	K7GRK7_PIG	Uncharacterized protein	0.307215	0.79635	-0.187015	0.308867	0.92338	-0.184158	0.00613746	0.0424	-0.355179	1	0.81194	0.00285672	0.389443	0.77079	0.168165	0.374179	0.86169	-0.171021
253	I3LQ17	14.7942	18.0406	17.6951	15.9136	17.9592	15.9814	16.6139	16.6989	16.3588	17.6573	17.2572	17.3146	17.082	17.0379	16.8856	17.4818	16.2889	17.4313	18.2304	18.3682	16.7736	16.3472	17.6627	16.7911	I3LQ17	PZP	I3LQ17_PIG	Uncharacterized protein	0.998867	0.85373	0.252782	0.807883	0.92338	0.303924	0.192541	0.56281	0.63156	0.888193	0.81194	0.0511416	0.312463	0.67489	-0.378778	0.654353	0.86169	0.327636
254	A0A287AA42;A0A5G2Q7Q6;A0A5G2R4N2	16.7394	16.8489	17.4061	16.9614	16.7922	16.7129	17.0876	17.507	17.6832	15.9881	17.1816	17.1492	17.828	16.4275	15.46	17.6175	15.7024	17.2523	16.4698	16.3368	17.5804	15.5975	16.7536	16.7595	A0A287AA42;A0A5G2Q7Q6;A0A5G2R4N2	NA	A0A287AA42_PIG;A0A5G2Q7Q6_PIG;A0A5G2R4N2_PIG	Ig-like domain-containing protein	0.95189	0.85373	0.189321	0.953856	0.92338	-0.195533	0.832152	0.83184	-0.327202	0.721507	0.81194	-0.384854	0.524657	0.85274	0.516523	0.985939	0.86169	-0.131669
255	A0A287AQD6;A0A5G2QP92	17.0985	16.4839	16.7418	16.6326	16.3254	16.734	16.3857	16.8462	17.0899	15.9392	16.3086	16.4208	16.8323	16.9421	16.4176	16.7017	16.4237	17.0758	16.7443	17.1077	16.345	16.9849	16.5367	16.4716	A0A287AQD6;A0A5G2QP92	MEGF10	A0A287AQD6_PIG;A0A5G2QP92_PIG	Uncharacterized protein	0.722203	0.85373	-0.170999	0.956777	0.92338	0.0628193	0.974547	0.83184	0.0289886	0.408949	0.79734	0.233818	0.476105	0.84302	-0.199988	0.999838	0.86169	-0.0338307
256	Q28944	16.547	15.8734	16.5781	16.2233	16.2901	16.1305	16.3344	16.2781	16.111	16.1349	15.8774	16.486	15.5559	17.1155	16.7545	16.9221	17.0491	16.5629	15.4958	16.4352	17.1124	17.3682	16.3241	16.3803	Q28944	CTSL	CATL1_PIG	Cathepsin L1	0.992067	0.85373	-0.0700981	0.430315	0.92338	0.386281	0.810355	0.83184	0.245598	0.276616	0.64075	0.456379	0.649553	0.85274	-0.315696	0.931614	0.86169	-0.140683
257	F1RRN0	17.4393	16.5517	16.4744	16.8524	16.5192	17.0904	16.5712	16.7144	17.1607	16.4797	16.7077	16.6853	16.297	16.7219	16.5262	14.7354	16.8342	16.7174	16.1566	16.3989	16.5433	16.4538	16.6267	16.5454	F1RRN0	PTK7	F1RRN0_PIG	Protein tyrosine kinase 7 (inactive)	0.975611	0.85373	-0.101386	0.168841	0.75189	-0.515857	0.522789	0.83184	-0.36709	0.356409	0.73073	-0.414471	0.772826	0.85274	0.265704	0.912766	0.86169	0.148767
258	A0A286ZMK5	16.4941	16.4042	16.7404	16.9373	16.7619	16.8805	16.6973	16.7543	16.7311	16.5829	16.7733	16.074	16.587	16.6623	16.6895	16.4343	16.9317	16.6395	16.2884	16.5641	16.4468	16.7292	16.7207	16.3995	A0A286ZMK5	PTPRM	A0A286ZMK5_PIG	Protein tyrosine phosphatase receptor type M	0.729857	0.85373	-0.100906	0.861454	0.92338	-0.0456564	0.0775351	0.30998	-0.178264	0.995116	0.81194	0.05525	0.502602	0.85274	0.0773579	0.340722	0.86169	-0.132608
259	A0A287A7R4;A0A287AQJ5	16.6929	16.6506	16.5263	16.6111	16.5803	16.6651	16.3274	19.3556	17.4787	16.748	17.4932	16.3511	16.8881	16.6389	16.6569	17.5502	16.4242	16.9843	16.2164	16.4087	16.3965	16.8047	16.4525	16.3784	A0A287A7R4;A0A287AQJ5	PKM	A0A287A7R4_PIG;A0A287AQJ5_PIG	Multifunctional fusion protein	0.156143	0.55045	0.671296	0.889395	0.92338	0.23608	0.944626	0.83184	-0.178146	0.528074	0.81194	-0.435216	0.0482348	0.2153	0.849442	0.569485	0.86169	-0.414226
260	A0A480NFS9;A0A5G2QEN6;A0A5G2QUQ9;A0A5G2R215;A0A5G2R8Y6	16.8651	16.4172	16.3413	16.6431	16.3065	16.9335	16.5428	16.0929	16.9725	16.2011	16.6501	16.704	16.3791	16.9139	16.5555	16.0485	16.4319	16.7576	15.8611	15.8199	16.4647	16.3911	16.5851	16.683	A0A480NFS9;A0A5G2QEN6;A0A5G2QUQ9;A0A5G2R215;A0A5G2R8Y6	TGFBR3	A0A480NFS9_PIG;A0A5G2QEN6_PIG;A0A5G2QUQ9_PIG;A0A5G2R215_PIG;A0A5G2R8Y6_PIG	Transforming growth factor beta receptor type 3	0.986569	0.85373	-0.0572238	0.969583	0.92338	-0.0700081	0.320993	0.77082	-0.283619	0.999473	0.81194	-0.0127842	0.514316	0.85274	0.226395	0.566219	0.86169	-0.213611
261	I3LDM1	18.089	18.0242	16.2122	17.1827	16.8494	16.7628	16.7624	16.1279	15.928	16.3974	17.4333	16.2221	16.6933	16.9884	16.5484	16.6722	16.7579	17.7568	16.5895	15.9243	15.6656	15.5535	15.6486	15.9382	I3LDM1	POSTN	I3LDM1_PIG	Periostin	0.0241933	0.14121	-0.708188	0.864804	0.92338	-0.283864	7.40762e-05	0.00109	-1.30008	0.176926	0.47805	0.424324	0.371615	0.75112	0.591895	0.00135877	0.01509	-1.01622
262	A0A287B4E8;A0A480ZQ94;F1SD87	17.1493	16.793	16.5504	16.3587	16.1536	16.4543	16.8006	16.3032	16.4632	16.1618	16.7814	16.8367	16.6781	16.9181	16.3527	16.3047	16.8049	16.4578	16.564	16.5594	16.2582	16.2544	16.1824	16.5022	A0A287B4E8;A0A480ZQ94;F1SD87	FBLN5	A0A287B4E8_PIG;A0A480ZQ94_PIG;F1SD87_PIG	Fibulin 5;Fibulin-5;Fibulin 5	0.992477	0.85373	-0.018703	0.987267	0.92338	0.00952034	0.566475	0.83184	-0.18976	0.999958	0.81194	0.0282233	0.451966	0.82178	0.171057	0.352918	0.86169	-0.19928
263	A0A287B9Q3	17.3201	16.4929	16.787	16.4377	16.6225	16.7447	16.5796	16.7124	16.5313	16.4852	16.6674	16.8184	16.9311	17.1441	16.4589	16.5362	16.6615	16.285	16.7422	16.3194	16.2676	16.3593	16.2688	16.4382	A0A287B9Q3	CNTN1	A0A287B9Q3_PIG	Contactin 1	0.980837	0.85373	-0.101783	0.984704	0.92338	-0.0646867	0.0362627	0.17127	-0.334918	0.999983	0.81194	0.037096	0.135815	0.41128	0.233135	0.077977	0.35076	-0.270231
264	F1SJB5	14.571	13.5303	16.7275	15.1412	15.959	17.5817	16.6316	14.6128	14.3419	17.4281	17.3533	17.6637	16.0697	17.1488	16.8271	18.0772	17.23	15.9086	16.2115	16.1772	16.9724	15.632	14.8535	16.8488	F1SJB5	ANXA1	F1SJB5_PIG	Annexin	0.592456	0.85373	0.753423	0.206732	0.83776	1.29177	0.958635	0.83184	0.53076	0.894158	0.81194	0.53835	0.891855	0.85274	0.222663	0.475764	0.86169	-0.761013
265	F1S795	16.7248	16.4362	16.1585	17.008	16.3333	16.8642	16.7512	16.9532	17.4238	16.8105	17.1653	16.5463	16.6407	16.6123	16.6971	16.1664	16.9208	16.4568	16.2955	16.7073	16.5007	16.907	16.8633	16.5832	F1S795	ROBO4	F1S795_PIG	Roundabout guidance receptor 4	0.0423918	0.21395	0.354217	0.986035	0.92338	-0.00516353	0.99721	0.83184	0.0553041	0.0161776	0.07765	-0.35938	0.030119	0.15933	0.298913	0.99902	0.86169	0.0604677
266	A0A287BCM2;F1RZR6	16.0758	16.8803	16.9408	15.2944	16.9406	14.664	17.0966	16.7981	17.1054	17.143	16.8626	16.3843	16.013	16.1351	16.8522	16.7493	16.2269	16.788	16.599	16.7684	16.6256	16.8096	14.9268	15.4553	A0A287BCM2;F1RZR6	CUTA	A0A287BCM2_PIG;F1RZR6_PIG	CutA divalent cation tolerance homolog	0.167034	0.55765	0.765693	0.68849	0.92338	0.328098	0.907482	0.83184	0.0648177	0.774255	0.81194	-0.437595	0.575561	0.85274	0.700875	0.978448	0.86169	-0.26328
267	A0A5G2QFC2;A0A5G2QPX2;P11708	18.2001	17.2092	16.4775	16.324	16.5288	16.4026	16.7173	18.641	16.9918	16.8156	17.2032	16.7749	17.4511	17.066	17.0443	17.9438	16.5511	17.2438	16.6028	16.4446	16.8532	16.8366	16.1024	16.665	A0A5G2QFC2;A0A5G2QPX2;P11708	MDH1	A0A5G2QFC2_PIG;A0A5G2QPX2_PIG;MDHC_PIG	Malate dehydrogenase;Malate dehydrogenase;Malate dehydrogenase, cytoplasmic	0.665555	0.85373	0.333608	0.488704	0.92338	0.359648	0.955842	0.83184	-0.272942	0.991738	0.81194	0.0260395	0.368798	0.74896	0.60655	0.210312	0.69251	-0.63259
268	A0A287BP22;A0A5G2QC98	16.5281	16.8462	16.4881	16.3521	16.542	16.2927	16.9255	17.1399	16.8674	16.9493	17.3311	16.5641	16.8691	16.5101	16.7947	16.5259	16.5603	16.9913	16.6066	16.8635	16.845	16.5398	15.8114	16.0254	A0A287BP22;A0A5G2QC98	FSTL1	A0A287BP22_PIG;A0A5G2QC98_PIG	Follistatin like 1	0.0149949	0.0953	0.454687	0.502055	0.92338	0.200371	0.997506	0.83184	-0.0595635	0.398844	0.78211	-0.254316	0.0123	0.0857	0.514251	0.385749	0.86169	-0.259935
269	A0A287ACR0;A0A287BIU2;F1RU22	17.234	16.8005	16.8025	16.6105	16.4113	16.634	16.7859	15.9522	16.3398	16.3134	16.5618	17.1026	16.7536	17.0212	16.2149	15.7572	16.6949	16.6519	16.2803	16.205	16.5073	16.318	16.1352	16.6189	A0A287ACR0;A0A287BIU2;F1RU22	EFEMP2	A0A287ACR0_PIG;A0A287BIU2_PIG;F1RU22_PIG	EGF containing fibulin extracellular matrix protein 2	0.510801	0.85373	-0.239536	0.669054	0.92338	-0.233177	0.241432	0.65745	-0.40469	0.995278	0.81194	0.00635932	0.951807	0.85274	0.165154	0.863476	0.86169	-0.171514
270	B9UJD6	16.9647	16.9318	16.8402	17.0236	16.7284	16.5646	16.4999	15.9836	16.3416	16.2311	16.291	15.8476	16.9104	16.7243	16.6491	16.7014	17.0601	17.0318	16.854	16.735	15.7465	16.5437	16.4538	16.3273	B9UJD6	C1QTNF3	B9UJD6_PIG	C1q and tumor necrosis factor related protein 3 isoform b	2.39141e-05	0.00044	-0.6431	0.999634	0.92338	0.00397394	0.0358308	0.1702	-0.398834	7.65826e-06	9e-05	0.647074	0.238394	0.5755	-0.244266	0.0224328	0.14148	-0.402808
271	A0A287B1L8	16.4458	16.7881	16.5949	16.5472	16.6062	16.4003	16.8109	16.9094	16.8023	16.7396	16.6386	16.484	16.6202	16.5523	16.7874	16.4491	16.5015	16.4943	16.3796	16.4983	16.3824	16.5621	16.1929	16.0838	A0A287B1L8	NOTCH1	A0A287B1L8_PIG	Neurogenic locus notch homolog protein 1 preproprotein	0.145055	0.52293	0.167048	0.99975	0.92338	0.00372753	0.0516009	0.22704	-0.213866	0.180309	0.48559	-0.16332	2.17601e-05	0.00045	0.380914	0.0343745	0.18722	-0.217593
272	A0A286ZTX3;F1RS82	15.8409	16.0009	17.368	16.4692	16.9409	16.5892	16.9712	16.6633	16.4846	16.3517	16.9629	16.698	15.5844	15.8342	16.759	15.6942	15.2015	16.6321	16.6892	16.4533	15.7206	17.2577	16.7987	15.1263	A0A286ZTX3;F1RS82	BTD	A0A286ZTX3_PIG;F1RS82_PIG	Biotinidase	0.996792	0.85373	0.153801	0.139579	0.67237	-0.583927	0.999999	0.83184	-0.193892	0.244163	0.60011	-0.737728	0.997163	0.85274	0.347692	0.155523	0.56922	0.390036
273	A0A286ZKA5;A0A5G2QLJ8;A0A5G2QNN2	16.8041	17.1843	16.5655	17.1552	16.4202	16.907	16.423	15.8334	16.4177	16.7488	16.571	17.0872	17.1703	16.1847	15.9005	17.2316	16.3078	17.3058	16.8611	16.1855	17.4379	15.7897	15.4902	17.0456	A0A286ZKA5;A0A5G2QLJ8;A0A5G2QNN2	C1QB	A0A286ZKA5_PIG;A0A5G2QLJ8_PIG;A0A5G2QNN2_PIG	Complement C1q B chain	0.682275	0.85373	-0.325867	0.957949	0.92338	-0.155938	0.638088	0.83184	-0.371065	0.932685	0.81194	0.169928	0.99959	0.85274	0.0451981	0.895076	0.86169	-0.215127
274	A0A287ALC1;A0A287B5C1	16.8311	16.7718	15.7435	15.7578	15.8943	15.9312	16.969	16.3116	16.4517	16.5535	16.485	16.2053	16.4215	16.617	16.2838	16.3267	16.0759	16.6771	16.7825	16.9081	16.8443	16.7714	16.6261	14.8675	A0A287ALC1;A0A287B5C1	NA	A0A287ALC1_PIG;A0A287B5C1_PIG	Uncharacterized protein	0.505664	0.85373	0.341079	0.606561	0.92338	0.245364	0.323656	0.77082	0.311711	0.998867	0.81194	-0.0957153	0.984951	0.85274	0.0293683	0.957189	0.86169	0.0663471
275	F1RUS9	16.8476	16.6726	16.4726	16.2924	16.4045	16.5215	16.5238	16.3744	16.3158	16.5676	16.3868	17.0373	16.1454	16.6877	16.2698	16.1425	16.2798	16.2921	16.3412	15.8049	16.5418	16.5676	15.9611	16.1463	F1RUS9	B4GAT1	F1RUS9_PIG	Beta-1,4-glucuronyltransferase 1	0.969169	0.85373	-0.000940929	0.231231	0.8867	-0.23232	0.0816297	0.3219	-0.308055	0.102071	0.3179	-0.231379	0.0435049	0.20263	0.307114	0.936957	0.86169	-0.0757344
276	A0A286ZLG5	16.7165	16.3188	16.4404	17.1809	16.2354	16.5656	16.7138	16.8183	16.3547	16.4253	16.6487	16.5286	16.1374	16.1806	16.5186	16.3359	17.046	16.2138	16.607	16.5466	16.2466	16.8221	16.4596	16.1435	A0A286ZLG5	NBL1	A0A286ZLG5_PIG	CTCK domain-containing protein	0.999984	0.85373	0.00528531	0.609036	0.92338	-0.17091	0.824308	0.83184	-0.105379	0.586556	0.81194	-0.176195	0.80661	0.85274	0.110664	0.985847	0.86169	0.0655311
277	A0A5G2R401	16.6774	16.2198	16.4446	17.1484	16.1495	16.5093	16.732	16.2235	17.1188	16.8709	16.358	16.9703	16.3198	16.8282	15.9532	17.0262	16.5727	16.9003	16.3768	16.3066	15.7708	16.6573	16.1402	15.5512	A0A5G2R401	TG	A0A5G2R401_PIG	Thyroglobulin	0.642848	0.85373	0.187418	0.976213	0.92338	0.0752338	0.135007	0.44435	-0.391008	0.872922	0.81194	-0.112184	0.00817418	0.06672	0.578426	0.0446125	0.22861	-0.466242
278	A0A286ZYQ3	16.4769	16.2101	16.4894	16.2321	16.1745	16.7354	16.7413	17.8061	16.7071	16.8516	16.9028	16.4446	17.0589	16.2417	16.4445	16.8712	16.6664	16.5636	17.3343	17.299	17.6355	17.5326	16.9998	17.3149	A0A286ZYQ3	FGL1	A0A286ZYQ3_PIG	Fibrinogen like 1	0.00792053	0.05961	0.522538	0.479535	0.92338	0.254657	1.39232e-07	0	0.966323	0.315098	0.68565	-0.267882	0.0749438	0.28941	-0.443785	0.000145462	0.00247	0.711667
279	A0A5G2RNL0	17.8293	16.1589	16.5535	17.1028	16.5031	17.7909	16.3798	17.5715	17.1016	15.729	16.5057	17.3634	16.2437	17.3612	16.6214	16.8121	17.598	17.6278	17.2304	17.7815	16.9768	16.0998	17.0719	16.1382	A0A5G2RNL0	ADAMTS13	A0A5G2RNL0_PIG	ADAM metallopeptidase with thrombospondin type 1 motif 13	0.918408	0.85373	-0.214595	0.987671	0.92338	0.054263	0.999997	0.83184	-0.10666	0.768721	0.81194	0.268858	0.918377	0.85274	-0.107935	0.989765	0.86169	-0.160923
280	P00355	16.8726	16.4097	15.7342	15.7119	16.3486	16.6511	16.1587	18.1552	17.1766	16.3575	16.9921	15.9933	17.1961	17.2372	16.7875	18.5576	16.49	17.5146	15.3243	16.2057	16.3594	16.0244	16.0275	16.2504	P00355	GAPDH	G3P_PIG	Glyceraldehyde-3-phosphate dehydrogenase	0.385355	0.85373	0.517579	0.0111137	0.14	1.00916	0.880531	0.83184	-0.256057	0.433245	0.81194	0.491579	0.102568	0.35252	0.773636	0.000651612	0.00795	-1.26522
281	A0A5G2RIC7;K7GQL2	16.8607	16.7237	16.1419	16.705	16.2173	16.6611	16.4918	16.4586	16.3596	15.809	16.4007	16.7875	16.6418	16.9374	16.0917	16.5743	16.5516	16.1399	16.499	15.9126	16.2016	15.841	16.0936	16.295	A0A5G2RIC7;K7GQL2	F13A1	A0A5G2RIC7_PIG;K7GQL2_PIG	Coagulation factor XIII A chain	0.999806	0.85373	-0.1671	0.995345	0.92338	-0.0621705	3.56663e-06	7e-05	-0.411152	0.998899	0.81194	0.10493	4.93532e-05	0.00094	0.244052	7.33955e-06	0.00018	-0.348981
282	F1S798;I3LJX8	17.3251	16.4306	16.3676	16.682	15.5284	17.5221	16.0633	16.1222	16.3349	16.3608	15.7901	16.9802	15.1407	16.1756	15.6567	14.9337	16.9965	16.5502	17.0431	16.3463	17.1083	16.5364	17.1448	17.0325	F1S798;I3LJX8	ESAM	F1S798_PIG;I3LJX8_PIG	Endothelial cell adhesion molecule	0.647936	0.85373	-0.367396	0.114683	0.61085	-0.733732	0.830437	0.83184	0.22593	0.704874	0.81194	-0.366336	0.195177	0.52303	-0.593325	0.0104571	0.07875	0.959662
283	F1SS26	15.6375	16.071	16.6652	15.6678	16.2343	16.1375	16.9505	17.23	17.756	17.0094	17.6766	16.5352	16.0968	15.4114	15.9807	17.5988	15.7894	16.1953	16.3658	16.8041	16.9713	16.8302	16.2382	16.3722	F1SS26	THBS1	F1SS26_PIG	Uncharacterized protein	1.88563e-05	0.00036	1.1241	0.998211	0.92338	0.109878	0.396519	0.83184	0.528101	4.84713e-05	0.00048	-1.01422	0.0178908	0.11357	0.595998	0.477779	0.86169	0.418224
284	F1SEY1	16.5798	15.8773	16.7853	16.3342	16.2078	16.1859	16.513	16.3559	16.4841	16.4026	16.0523	16.2054	15.4734	16.4709	16.4503	16.3673	16.6965	16.4041	16.1658	16.5964	16.8359	16.3894	16.3025	16.1765	F1SEY1	MAN2B1	F1SEY1_PIG	Alpha-mannosidase	0.99998	0.85373	0.00718795	0.995359	0.92338	-0.0179413	0.916154	0.83184	0.0827206	0.997469	0.81194	-0.0251293	0.917378	0.85274	-0.0755327	0.809032	0.86169	0.100662
285	A0A286ZRX5;A0A287BEN0;A0A287BRY6;F1RW32	16.1841	16.5536	16.4154	17.1217	16.691	16.7726	16.0872	16.0162	16.3745	16.9205	15.7846	15.8767	15.7131	15.9204	16.7353	16.4312	17.5404	16.9112	16.0164	16.0279	15.5918	16.8045	16.5434	16.0306	A0A286ZRX5;A0A287BEN0;A0A287BRY6;F1RW32	SPARCL1	A0A286ZRX5_PIG;A0A287BEN0_PIG;A0A287BRY6_PIG;F1RW32_PIG	SPARC like 1	0.251078	0.704	-0.446452	0.95482	0.92338	-0.0811502	0.128306	0.43251	-0.453961	0.553341	0.81194	0.365302	0.979689	0.85274	0.00750961	0.315598	0.85676	-0.372811
286	F1S8R6	16.6377	16.5021	16.4462	16.8709	16.3039	16.5421	16.2589	16.1187	16.4808	16.625	16.1707	16.5263	16.5791	16.4511	16.262	16.359	16.5851	16.1049	16.1054	16.0565	16.1993	16.2672	16.1539	16.0373	F1S8R6	C8H4orf48	F1S8R6_PIG	Uncharacterized protein	0.365755	0.85373	-0.187123	0.0331618	0.29878	-0.160311	1.3578e-13	0	-0.413915	0.744816	0.81194	0.0268125	2.01533e-07	1e-05	0.226791	2.85434e-06	9e-05	-0.253604
287	P26234	16.851	16.5671	16.1226	16.7367	16.2087	16.4772	16.372	17.8872	17.1299	16.832	16.7935	16.3682	16.5372	16.2704	16.2032	17.2253	16.3937	16.3007	16.3516	16.4027	16.5261	16.2788	16.432	16.3876	P26234	VCL	VINC_PIG	Vinculin	0.164098	0.55376	0.403223	0.999751	0.92338	-0.00550993	0.931348	0.83184	-0.0974418	0.141009	0.4169	-0.408733	0.0457142	0.2095	0.500664	0.952337	0.86169	-0.0919318
288	F1S3G6;I3L7A4	16.6159	16.4097	16.6034	17.1311	16.1316	16.6048	16.2749	15.8567	16.447	16.7527	16.57	16.7912	16.7036	16.4405	16.3003	16.0659	16.4346	16.4758	16.2457	16.0239	15.8029	16.2631	16.1575	16.304	F1S3G6;I3L7A4	OLFM2	F1S3G6_PIG;I3L7A4_PIG	Noelin-2 isoform 1;Noelin-2 isoform 2	0.775728	0.85373	-0.134021	0.470482	0.92338	-0.179308	0.00330343	0.02605	-0.44989	0.95906	0.81194	-0.0452869	0.0554217	0.2363	0.31587	0.156129	0.56922	-0.270583
289	F1RHE6	16.0922	16.6745	16.5639	16.4966	16.6271	16.2121	16.8186	15.946	15.9685	16.3282	17.115	15.7807	16.2371	16.8787	16.3115	16.2907	15.6018	16.4257	16.5489	16.1892	15.9894	15.5705	16.3941	15.6215	F1RHE6	KCTD12	F1RHE6_PIG	Potassium channel tetramerization domain containing 12	0.931244	0.85373	-0.118227	0.931949	0.92338	-0.153502	0.432911	0.83184	-0.392131	1	0.81194	-0.0352751	0.796891	0.85274	0.273903	0.781183	0.86169	-0.238628
290	A0A5G2R7E9;F1SHP1	16.6196	16.3987	16.9969	16.2326	16.6044	15.9519	17.3468	17.047	16.9394	16.928	17.0501	16.7276	16.0546	15.8551	16.6712	16.2701	16.0976	16.4241	16.2895	16.8471	15.9415	16.8359	16.1033	16.046	A0A5G2R7E9;F1SHP1	ADAMTS1	A0A5G2R7E9_PIG;F1SHP1_PIG	Peptidase M12B domain-containing protein	0.0237932	0.13983	0.539129	0.382822	0.92338	-0.238542	0.998839	0.83184	-0.123418	6.9946e-05	0.00066	-0.777672	0.0343005	0.17375	0.662547	0.501203	0.86169	0.115125
291	Q9XSD9	17.8652	16.8818	14.8361	13.7889	14.2685	14.5354	16.454	16.8253	16.7852	14.0267	15.8827	17.0495	17.0405	16.4051	14.1349	16.7892	16.9144	17.4551	17.7302	17.7122	15.9419	17.1583	14.104	16.0517	Q9XSD9	DCN	PGS2_PIG	Decorin	0.332609	0.8344	0.807912	0.0990376	0.56385	1.0939	0.112448	0.40174	1.08705	0.937316	0.81194	0.285986	0.939547	0.85274	-0.27914	0.999987	0.86169	-0.00684622
292	F1RU34	16.9997	15.8137	16.455	15.7632	15.9925	16.0452	16.7254	16.7367	16.1198	16.7275	16.624	16.6621	15.7697	16.3329	16.0159	15.7996	16.1157	16.0959	15.6572	15.3373	16.3463	16.3332	15.8754	15.8562	F1RU34	CST6	F1RU34_PIG	Cystatin E/M	0.00932539	0.06724	0.42103	0.663168	0.92338	-0.156615	0.539663	0.83184	-0.277294	0.00015928	0.00138	-0.577645	0.000347301	0.00562	0.698324	0.994062	0.86169	-0.120679
293	A0A286ZQI5;A0A286ZZM6;A0A287AQ76;A0A287ASJ8	16.4998	16.5407	16.4627	16.7873	16.2625	16.3746	16.3194	16.3206	16.4641	16.443	16.2241	16.4672	15.9185	16.2756	16.1174	16.2988	16.465	16.1518	15.6449	16.073	16.2218	16.2467	16.2081	15.9345	A0A286ZQI5;A0A286ZZM6;A0A287AQ76;A0A287ASJ8	CHL1	A0A286ZQI5_PIG;A0A286ZZM6_PIG;A0A287AQ76_PIG;A0A287ASJ8_PIG	Cell adhesion molecule L1 like	0.582718	0.85373	-0.114875	0.00536891	0.07665	-0.283412	1.65901e-06	4e-05	-0.433085	0.17107	0.4716	-0.168536	0.000742116	0.01043	0.318209	0.254669	0.76844	-0.149673
294	A0A287ATF0;I3LNA2	16.6668	16.3748	16.2908	16.2579	16.2184	16.6084	16.5626	16.498	16.1336	16.3825	16.0949	16.2262	16.1177	16.1401	16.1906	16.2685	16.4813	16.1187	16.0836	16.2875	15.9762	16.2847	15.9531	15.7503	A0A287ATF0;I3LNA2	COLEC10	A0A287ATF0_PIG;I3LNA2_PIG	Collectin subfamily member 10	0.807543	0.85373	-0.0865532	0.272285	0.92338	-0.183358	0.00478459	0.03547	-0.346937	0.797142	0.81194	-0.0968047	0.06728	0.2707	0.260384	0.378984	0.86169	-0.16358
295	A0A5G2R3I8;F1RN44	17.0405	16.6518	15.3792	16.4918	15.1791	15.23	16.7759	16.3949	15.6554	16.0102	16.5595	16.4917	16.7393	15.3306	15.2417	16.4228	16.832	16.7017	16.6756	15.2576	15.0504	15.3914	16.568	14.8432	A0A5G2R3I8;F1RN44	LAMP1	A0A5G2R3I8_PIG;F1RN44_PIG	Uncharacterized protein	0.802054	0.85373	0.319219	0.849741	0.92338	0.215971	0.93103	0.83184	-0.364335	0.999753	0.81194	-0.103248	0.450224	0.82178	0.683553	0.48226	0.86169	-0.580305
296	A0A5G2QSU4;F1SMJ1	17.0083	16.7441	16.208	16.3823	16.0751	17.2357	15.9444	15.1626	16.2133	15.464	16.0311	17.5709	16.106	16.6006	15.7994	16.5562	17.3858	16.3605	15.8595	16.0491	16.834	16.3828	17.1313	16.2933	A0A5G2QSU4;F1SMJ1	C7	A0A5G2QSU4_PIG;F1SMJ1_PIG	Complement component C7	0.638529	0.85373	-0.54455	0.954352	0.92338	-0.140825	0.480325	0.83184	-0.183915	0.908554	0.81194	0.403725	0.994244	0.85274	-0.360635	0.775685	0.86169	-0.0430897
297	A0A287BL66;F1SGH0	16.2382	16.4538	16.2801	16.6517	16.2457	16.6258	16.0916	16.2538	16.5352	16.4668	16.1634	16.4594	16.2344	16.3034	16.3066	16.2436	16.3668	16.019	15.9761	16.2159	16.1224	16.4417	16.3105	16.0654	A0A287BL66;F1SGH0	PTPRG	A0A287BL66_PIG;F1SGH0_PIG	Protein tyrosine phosphatase receptor type G	0.896286	0.85373	-0.087498	0.0149151	0.17088	-0.170266	7.32127e-06	0.00014	-0.227207	0.124078	0.37361	-0.0827682	0.000835987	0.01129	0.139709	0.195155	0.66095	-0.056941
298	A0A286ZYL3;A0A287A2L7;A0A5G2QEI5;A0A5G2QHH4;A0A5G2QIF2;A0A5G2QUX0;A0A5G2QWN3;A0A5G2RB21;F1SL03	16.2492	16.2935	15.8916	16.4289	15.7874	16.3045	16.089	16.0202	16.7282	16.3025	16.206	16.6242	16.1676	16.4867	16.2805	16.1839	16.3043	16.1375	15.9583	15.8835	16.3728	16.5743	16.4328	15.929	A0A286ZYL3;A0A287A2L7;A0A5G2QEI5;A0A5G2QHH4;A0A5G2QIF2;A0A5G2QUX0;A0A5G2QWN3;A0A5G2RB21;F1SL03	ABI3BP	A0A286ZYL3_PIG;A0A287A2L7_PIG;A0A5G2QEI5_PIG;A0A5G2QHH4_PIG;A0A5G2QIF2_PIG;A0A5G2QUX0_PIG;A0A5G2QWN3_PIG;A0A5G2RB21_PIG;F1SL03_PIG	ABI family member 3 binding protein	0.0522797	0.2496	0.169143	0.856957	0.92338	0.100895	0.833982	0.83184	0.0326183	0.289906	0.66447	-0.0682481	0.0114794	0.0813	0.136524	0.36252	0.86169	-0.0682762
299	A0A5G2QFH9;A0A5G2QMM3;A0A5G2QPV6;A0A5G2QQ60;A0A5G2QWR7;A0A5G2R8D4;K7GPV0	16.8077	16.0136	16.2215	16.7416	15.8738	16.2235	15.9956	16.0615	16.6009	16.0991	16.1772	16.404	16.0369	16.6905	16.1156	16.1596	16.6763	15.9999	16.1372	16.1985	16.2213	16.6544	16.5023	16.303	A0A5G2QFH9;A0A5G2QMM3;A0A5G2QPV6;A0A5G2QQ60;A0A5G2QWR7;A0A5G2R8D4;K7GPV0	ADGRG2	A0A5G2QFH9_PIG;A0A5G2QMM3_PIG;A0A5G2QPV6_PIG;A0A5G2QQ60_PIG;A0A5G2QWR7_PIG;A0A5G2R8D4_PIG;K7GPV0_PIG	Adhesion G protein-coupled receptor G2	0.991872	0.85373	-0.0905823	0.970628	0.92338	-0.0338486	0.822596	0.83184	0.022457	0.892871	0.81194	0.0567337	0.720049	0.85274	-0.113039	0.969329	0.86169	0.0563056
300	F1S0Y1	16.6476	16.3026	16.4304	16.7154	16.1703	16.7383	15.7883	15.8513	16.7254	15.6337	16.5216	15.9154	15.9464	16.5081	16.2633	15.3636	15.6801	15.5757	15.2966	15.4684	16.0078	15.6873	15.8915	16.0476	F1S0Y1	HMCN2	F1S0Y1_PIG	Hemicentin 2	0.149335	0.53387	-0.428136	0.000397601	0.00987	-0.611206	3.39894e-06	7e-05	-0.767543	0.303588	0.67883	-0.18307	0.0285521	0.15685	0.339407	0.5676	0.86169	-0.156337
301	A0A5G2QBB0	16.3629	16.5424	16.5584	14.9944	16.4202	15.5323	16.3627	15.7777	15.9919	15.5508	16.2517	16.7974	17.0426	16.6539	16.3432	16.2412	16.2085	16.3719	16.9024	16.0242	16.062	15.8473	15.8292	16.1612	A0A5G2QBB0	KNG1	A0A5G2QBB0_PIG	Kininogen 1	0.994135	0.85373	0.0536014	0.0935409	0.54254	0.408462	0.704884	0.83184	0.0692773	0.164397	0.46418	0.35486	0.841687	0.85274	-0.0156759	0.614415	0.86169	-0.339185
302	A0A5G2RB13;F1SPG5;I3LHL6	16.5742	16.8441	15.4739	15.9055	15.874	15.7477	15.9139	16.3008	16.1533	15.8089	16.5294	16.0714	16.1073	16.5752	16.1487	16.0386	16.7751	16.2961	16.0846	16.0414	15.3125	15.9793	15.92	15.7054	A0A5G2RB13;F1SPG5;I3LHL6	FBLN2	A0A5G2RB13_PIG;F1SPG5_PIG;I3LHL6_PIG	Fibulin 2	0.979401	0.85373	0.0597488	0.3038	0.92338	0.253593	0.847246	0.83184	-0.229379	0.536125	0.81194	0.193844	0.636857	0.85274	0.289127	0.0505736	0.25763	-0.482971
303	A0A5G2QP78;K7GMF9	16.0108	16.693	16.384	16.0137	16.308	16.1553	16.5798	16.5124	16.5014	16.209	16.5598	16.205	16.2007	15.8295	16.2094	16.0696	15.96	16.3111	16.2807	16.1331	15.7234	15.7995	15.9458	15.5065	A0A5G2QP78;K7GMF9	ANPEP	A0A5G2QP78_PIG;K7GMF9_PIG	Aminopeptidase	0.716952	0.85373	0.167087	0.546215	0.92338	-0.16408	0.0400233	0.18384	-0.362651	0.0915065	0.30109	-0.331168	0.00354677	0.03619	0.529738	0.489761	0.86169	-0.19857
304	A0A287ATY3;F1S280	16.03	16.4113	16.2295	16.03	16.1571	15.9727	16.1876	15.9454	16.0422	16.0879	16.084	16.1899	16.3614	16.3562	16.2175	16.1447	16.3807	16.1057	16.1177	15.9778	16.0318	16.2613	16.0629	15.886	A0A287ATY3;F1S280	ENPP2	A0A287ATY3_PIG;F1S280_PIG	Ectonucleotide pyrophosphatase/phosphodiesterase 2	0.883574	0.85373	-0.0489333	0.21215	0.85227	0.122603	0.766243	0.83184	-0.0821954	0.0384569	0.15308	0.171536	0.993882	0.85274	0.0332621	0.0172956	0.11522	-0.204798
305	A0A287ALJ6	16.3792	16.947	16.0784	16.0901	14.3438	15.6394	16.6002	15.6768	15.7706	15.4131	15.5483	16.9971	16.9214	16.2365	16.5384	16.3066	16.3884	14.7869	15.3157	15.9465	16.5862	15.4076	16.2125	15.8321	A0A287ALJ6	NA	A0A287ALJ6_PIG	Ig-like domain-containing protein	0.866354	0.85373	0.088051	0.864176	0.92338	0.283381	0.91048	0.83184	-0.0295418	1	0.81194	0.19533	0.543983	0.85274	0.117593	0.476338	0.86169	-0.312923
306	A0A287BBJ9	16.6074	15.6935	16.6132	16.344	16.4041	16.2687	14.6824	15.3376	14.2628	15.2238	15.264	15.1873	16.327	16.8218	16.772	16.9383	17.0364	16.2489	15.6001	15.063	15.2947	15.5981	14.7849	14.6789	A0A287BBJ9	PCSK9	A0A287BBJ9_PIG	Proprotein convertase subtilisin/kexin type 9	4.07717e-11	0	-1.32882	0.24088	0.90501	0.368915	5.94678e-08	0	-1.15186	0	0	1.69774	0.806104	0.85274	-0.176961	4.4853e-14	0	-1.52078
307	A0A5G2Q956;O97763	16.6921	16.0443	16.0584	15.6797	15.9605	15.8397	16.5989	16.3592	16.1571	16.2512	16.9228	16.6916	16.0611	16.1956	16.0073	16.1635	16.1011	16.1151	15.8072	16.0356	16.2061	16.4223	15.6556	16.1721	A0A5G2Q956;O97763	NPC2	A0A5G2Q956_PIG;NPC2_PIG	NPC intracellular cholesterol transporter 2	0.00595496	0.04731	0.451018	0.940013	0.92338	0.0615251	0.991773	0.83184	0.00403825	0.0388317	0.15382	-0.389492	0.0211101	0.12922	0.446979	0.992357	0.86169	-0.0574868
308	A0A287BG16	16.2461	16.1496	16.1039	16.1794	16.1947	16.3906	16.4477	16.2347	16.2231	16.1674	16.2479	16.0574	15.6752	16.1052	16.234	15.7708	15.9457	16.1462	15.978	16.0101	16.1241	16.0782	15.9521	15.9008	A0A287BG16	B4GALT1	A0A287BG16_PIG	Beta-1,4-galactosyltransferase 1	0.999974	0.85373	0.0189799	0.00620505	0.08725	-0.231212	0.104569	0.38511	-0.203495	0.00694174	0.03776	-0.250192	0.125436	0.39266	0.222475	0.819864	0.86169	0.0277177
309	A0A287ALP4;A0A5G2Q9R1;A0A5G2QF74;A8D737	16.7288	16.2498	16.3152	15.9308	16.2237	15.813	16.4458	16.1972	16.1904	15.9979	16.1984	16.9386	15.6676	16.5723	16.4176	15.8003	16.0791	16.2384	16.0929	15.9746	16.5259	15.8498	15.7644	15.816	A0A287ALP4;A0A5G2Q9R1;A0A5G2QF74;A8D737	CDH13	A0A287ALP4_PIG;A0A5G2Q9R1_PIG;A0A5G2QF74_PIG;A8D737_PIG	Uncharacterized protein;Uncharacterized protein;Uncharacterized protein;Cadherin-13	0.573652	0.85373	0.117814	0.990343	0.92338	-0.0809971	0.887876	0.83184	-0.206277	0.399683	0.78211	-0.198811	0.264456	0.61254	0.324091	0.970874	0.86169	-0.12528
310	A0A287BLX2;A0A5G2RMJ1;I3LDJ1	16.3489	16.7599	15.8458	16.4553	15.9467	16.2546	16.7644	16.9905	16.5798	16.522	17.1391	17.5818	16.9806	16.3496	16.3731	16.2786	16.5533	16.5927	16.5938	16.8226	17.2294	16.7513	16.8522	16.5416	A0A287BLX2;A0A5G2RMJ1;I3LDJ1	FOLR1	A0A287BLX2_PIG;A0A5G2RMJ1_PIG;I3LDJ1_PIG	Folate receptor alpha	0.000158474	0.00216	0.661064	0.342158	0.92338	0.252762	0.00674111	0.04582	0.52995	0.0583026	0.21239	-0.408302	0.85125	0.85274	0.131114	0.341949	0.86169	0.277188
311	P62936	16.2323	16.4773	16.3469	16.2839	15.6036	16.0577	16.1708	16.916	16.3221	16.1316	17.1081	15.6849	15.6023	15.8068	16.3828	17.4461	15.4278	16.9454	16.275	16.381	16.1741	16.1641	16.2953	16.1327	P62936	PPIA	PPIA_PIG	Peptidyl-prolyl cis-trans isomerase A	0.839503	0.85373	0.221961	0.986702	0.92338	0.101595	0.998022	0.83184	0.0700897	0.962048	0.81194	-0.120366	0.922878	0.85274	0.151871	0.998633	0.86169	-0.0315054
312	P02189	14.5786	18.6092	16.96	16.9147	16.3832	17.0363	16.1723	14.0526	16.7838	16.5094	16.5677	18.3312	17.5	17.2219	17.1038	18.0464	16.3275	18.3458	15.4303	16.2163	13.8063	16.9123	17.1907	15.5225	P02189	MB	MYG_PIG	Myoglobin	0.920898	0.85373	-0.344172	0.55822	0.92338	0.677249	0.206372	0.58683	-0.900597	0.231207	0.57171	1.02142	0.605625	0.85274	0.556425	0.0061487	0.0512	-1.57785
313	A0A5G2QH98;A0A5G2RGP6;A0A5G2RKA4;F1S571	16.7321	16.0011	14.9099	15.6228	15.6559	15.8548	15.7117	15.8939	16.0048	15.0071	16.313	15.6095	17.0122	15.7771	15.9401	15.8294	16.1781	16.8978	16.0762	15.644	15.9576	15.7509	15.0069	15.6851	A0A5G2QH98;A0A5G2RGP6;A0A5G2RKA4;F1S571	COL11A1	A0A5G2QH98_PIG;A0A5G2RGP6_PIG;A0A5G2RKA4_PIG;F1S571_PIG	Collagen type XI alpha 1 chain	0.998609	0.85373	-0.0394193	0.160986	0.73282	0.476371	0.999933	0.83184	-0.109322	0.114702	0.34924	0.515791	0.999689	0.85274	0.0699026	0.142161	0.53517	-0.585693
314	A0A480TAV6;F1SJF9	16.957	16.0372	15.8193	15.9271	15.8928	16.1212	16.6119	16.5053	16.1567	15.9638	16.7928	16.2472	15.7937	15.8364	15.9782	15.4709	15.9263	16.1141	15.918	16.1172	16.0978	16.5036	15.5114	15.946	A0A480TAV6;F1SJF9	FAM3C	A0A480TAV6_PIG;F1SJF9_PIG	Family with sequence similarity 3 member C	0.418816	0.85373	0.253841	0.461726	0.92338	-0.272483	0.989561	0.83184	-0.110096	0.0151646	0.07366	-0.526324	0.275598	0.62649	0.363937	0.663588	0.86169	0.162387
315	A0A286ZVN0	16.1707	16.3764	15.9349	17.6793	15.8145	18.73	20.8854	20.7598	19.1926	20.225	19.6484	21.1415	16.1003	18.1351	13.3584	17.3446	15.7219	15.4221	20.5671	20.794	21.9038	21.5748	21.3566	20.2718	A0A286ZVN0	LOC106504547	A0A286ZVN0_PIG	SERPIN domain-containing protein	8.12203e-11	0	3.5245	0.545972	0.92338	-0.770551	2.17404e-12	0	4.29373	6.77236e-15	0	-4.29505	0.92005	0.85274	-0.76923	0	0	5.06428
316	F1S7K2	15.9784	15.9812	16.999	16.3891	16.2641	16.5188	16.4214	16.7254	16.2985	17.5845	16.9927	16.2867	16.1256	15.8265	16.1973	16.2725	15.705	16.7801	16.9008	16.6127	17.2918	16.7591	16.1852	16.4579	F1S7K2	PLIN5	F1S7K2_PIG	Perilipin 5	0.535293	0.85373	0.36308	0.49583	0.92338	-0.203971	0.127022	0.42992	0.346132	0.0360393	0.15004	-0.567051	0.849407	0.85274	0.0169482	0.00190931	0.01992	0.550103
317	A0A5S6GXI4;Q8HZV3	16.5946	16.0592	16.021	16.2631	15.8285	16.1866	16.1168	16.2307	16.4638	16.3061	16.5703	16.0065	16.1058	16.3445	16.2063	16.5799	16.3698	15.9915	16.2328	16.1553	15.6369	16.0349	16.4405	16.0512	A0A5S6GXI4;Q8HZV3	TFRC	A0A5S6GXI4_PIG;TFR1_PIG	Transferrin receptor protein 1	0.744968	0.85373	0.123535	0.886053	0.92338	0.107444	0.851694	0.83184	-0.066911	0.992975	0.81194	-0.0160905	0.281704	0.63116	0.190446	0.406123	0.86169	-0.174356
318	A0A287AJQ2	16.6607	16.1793	15.641	15.9674	15.7192	15.8692	16.2028	17.0152	16.2713	15.9304	16.4896	16.517	16.3136	15.9396	15.754	16.1392	15.6153	16.354	15.8606	15.8439	16.4019	16.1866	15.9866	16.2002	A0A287AJQ2	PGAM1	A0A287AJQ2_PIG	Phosphoglycerate mutase	0.060133	0.27298	0.398264	0.990414	0.92338	0.013166	0.815537	0.83184	0.0738598	0.130228	0.39068	-0.385098	0.413034	0.79224	0.324404	0.932734	0.86169	0.0606938
319	P16611	15.9577	16.1372	15.937	15.8504	15.7295	16.0415	15.6953	15.8397	15.8331	15.8684	16.1606	16.3313	16.1635	16.27	15.6911	15.6064	15.8618	15.8621	15.7396	15.5966	15.9293	15.6636	15.5886	15.6817	P16611	IGFBP3	IBP3_PIG	Insulin-like growth factor-binding protein 3	0.94139	0.85373	0.012519	0.995367	0.92338	-0.0330562	0.0605094	0.2542	-0.242307	0.8571	0.81194	-0.0455752	0.0215369	0.12998	0.254826	0.0941333	0.39192	-0.209251
320	A0A5G2QGW8;A0A5G2R0H3;F6Q5E9	16.3809	16.3061	15.8791	16.2887	16.2331	16.0978	16.143	15.8601	15.5608	15.9376	16.543	15.7882	15.7544	15.9352	15.469	15.7248	15.6652	16.2806	15.7667	15.4831	15.5599	15.9841	15.4956	15.6816	A0A5G2QGW8;A0A5G2R0H3;F6Q5E9	DKK3	A0A5G2QGW8_PIG;A0A5G2R0H3_PIG;F6Q5E9_PIG	Dickkopf WNT signaling pathway inhibitor 3	0.279461	0.74644	-0.225507	0.0222727	0.22713	-0.392753	0.00144447	0.01388	-0.535763	0.699728	0.81194	-0.167246	0.215204	0.5489	0.310256	0.808597	0.86169	-0.14301
321	A0A287A732;F1SLT8	16.6002	15.3459	15.6318	15.679	16.001	16.5496	16.4044	16.5365	16.1879	15.5497	16.9718	15.6482	15.8741	15.5802	15.5965	15.8225	15.769	15.6014	15.3444	15.8895	15.2418	15.8053	15.5665	15.6796	A0A287A732;F1SLT8	CCDC80	A0A287A732_PIG;F1SLT8_PIG	Coiled-coil domain containing 80	0.635898	0.85373	0.248497	0.557129	0.92338	-0.260627	0.225911	0.62745	-0.380061	0.0622271	0.22568	-0.509124	0.0122579	0.0857	0.628558	0.91882	0.86169	-0.119434
322	A0A287B2K4;A0A287B3A2;I3LB28	16.4099	16.2282	15.9006	16.3697	16.02	16.3287	15.9565	16.0218	16.5707	15.849	16.0711	16.4831	16.32	16.353	16.0294	15.6663	16.5133	15.7393	16.1529	15.9715	16.3154	15.8865	16.3875	16.1151	A0A287B2K4;A0A287B3A2;I3LB28	NRP2	A0A287B2K4_PIG;A0A287B3A2_PIG;I3LB28_PIG	Neuropilin	0.873207	0.85373	-0.050822	0.734339	0.92338	-0.105974	0.310865	0.76436	-0.0713559	0.305357	0.67883	-0.0551524	0.108899	0.35939	0.0205339	0.869823	0.86169	0.0346185
323	Q1KS52	15.2974	15.8419	16.0316	16.2709	15.5936	16.1372	16.2571	15.4089	16.0117	16.3033	15.9902	15.8711	15.9195	16.1923	15.8124	15.8956	15.4078	16.0126	16.0112	15.9326	16.3531	16.1428	16.2829	16.3358	Q1KS52	ALS	Q1KS52_PIG	Acid-labile subunit	0.867667	0.85373	0.111634	0.999192	0.92338	0.0112889	0.325845	0.77082	0.314336	0.806946	0.81194	-0.100345	0.778429	0.85274	-0.202702	0.242336	0.74495	0.303047
324	A0A287B6M0;F1RXC2	16.7279	16.7968	15.7978	16.4237	16.0203	16.3146	15.9988	16.6417	16.7824	16.0866	15.9854	16.305	17.9036	16.5559	16.3184	18.0079	16.3016	16.6631	16.546	16.5513	16.115	16.0159	16.1	16.297	A0A287B6M0;F1RXC2	CA2	A0A287B6M0_PIG;F1RXC2_PIG	Carbonic anhydrase	0.99197	0.85373	-0.0468857	0.0278521	0.27207	0.611597	0.84486	0.83184	-0.0759666	0.0734003	0.25166	0.658483	0.734041	0.85274	0.029081	0.00216579	0.02233	-0.687564
325	Q8HZW2	16.6016	16.4395	15.8236	16.5826	16.3374	16.107	15.6912	16.5103	16.298	15.6688	16.4737	16.5318	15.912	15.9449	15.0268	15.2939	16.007	15.8722	16.1132	16.1331	16.263	15.7235	15.7276	15.8067	Q8HZW2	MYOC	Q8HZW2_PIG	Myocilin	0.991699	0.85373	-0.119672	0.00098285	0.01861	-0.639169	0.173092	0.52096	-0.354073	0.00415604	0.02457	-0.519497	0.345817	0.7185	0.2344	0.393554	0.86169	0.285096
326	A0A287BKZ4;F1SP42	15.7954	15.9694	16.1472	16.2867	16.0802	16.1018	16.218	15.8763	16.0692	16.2515	15.7578	16.0003	15.979	16.0782	16.3157	15.4082	15.9806	15.9028	15.6711	15.7854	15.7343	15.9792	16.0816	15.831	A0A287BKZ4;F1SP42	CDH6	A0A287BKZ4_PIG;F1SP42_PIG	Cadherin 6	0.988963	0.85373	-0.0346051	0.621448	0.92338	-0.119349	0.133729	0.44364	-0.216342	0.808069	0.81194	-0.0847441	0.247574	0.58773	0.181737	0.746372	0.86169	-0.0969933
327	A0A286ZIL9;A0A5G2R4W0	16.4089	15.9441	15.8731	16.0673	15.7437	15.9511	16.2287	16.0726	16.2668	16.3839	16.5272	16.4342	15.7783	16.2794	16.0917	15.5337	15.9873	16.013	15.9388	16.0574	16.659	16.3865	16.0466	15.9227	A0A286ZIL9;A0A5G2R4W0	COL18A1	A0A286ZIL9_PIG;A0A5G2R4W0_PIG	Collagen type XVIII alpha 1 chain	0.000187366	0.00247	0.320907	0.887553	0.92338	-0.0507859	0.352405	0.81191	0.170473	9.13326e-06	0.00011	-0.371692	0.123453	0.39185	0.150433	0.0816552	0.35895	0.221259
328	A0A287BGV1	16.1947	16.147	16.0615	16.1328	16.0918	16.212	15.9431	15.7843	15.7613	15.6097	16.3735	15.9038	15.9235	16.0971	16.2496	15.6134	16.0286	16.2155	16.0932	15.8	15.6515	15.7203	15.2172	15.3578	A0A287BGV1	LTBP4	A0A287BGV1_PIG	Latent transforming growth factor beta binding protein 4	0.175938	0.57395	-0.244025	0.854683	0.92338	-0.118676	0.00131704	0.0128	-0.499965	0.6158	0.81194	0.125349	0.317191	0.68031	0.25594	0.0157111	0.10798	-0.381289
329	F1SR05;P00336	17.2779	16.3994	15.7794	16.4056	16.0074	16.4461	15.8391	18.1038	16.9028	16.081	16.5177	16.3202	17.0088	16.4527	15.7602	16.8652	16.3512	16.1689	15.7147	15.9816	16.2104	15.9788	16.4255	16.4163	F1SR05;P00336	LDHB	F1SR05_PIG;LDHB_PIG	L-lactate dehydrogenase;L-lactate dehydrogenase B chain	0.837756	0.85373	0.241474	0.997388	0.92338	0.0485522	0.838972	0.83184	-0.264758	0.921141	0.81194	-0.192921	0.354945	0.73122	0.506232	0.721797	0.86169	-0.31331
330	A0A286ZRI5;Q49I35	16.4927	16.0706	15.3492	15.6284	15.3415	16.3418	15.3965	15.9401	15.9542	15.0221	16.371	15.7433	15.7998	15.8763	15.6842	16.0134	15.8895	16.5719	15.7993	16.255	16.149	15.6434	16.1522	15.958	A0A286ZRI5;Q49I35	LGALS1	A0A286ZRI5_PIG;LEG1_PIG	Galectin;Galectin-1	0.919122	0.85373	-0.132821	0.944174	0.92338	0.10182	0.892669	0.83184	0.122116	0.630989	0.81194	0.234641	0.542847	0.85274	-0.254937	0.998278	0.86169	0.0202965
331	F1SB08;I3LVI7	16.347	16.0038	16.2213	16.4606	16.1835	16.2133	16.0756	15.7963	16.23	15.9801	15.7676	16.0555	15.7449	16.087	15.9009	15.494	16.1156	15.8734	15.6838	15.8363	15.6965	15.9225	16.0222	15.8717	F1SB08;I3LVI7	NOTCH2	F1SB08_PIG;I3LVI7_PIG	Neurogenic locus notch homolog protein 2 isoform 1 preproprotein;Notch receptor 2	0.0322494	0.17186	-0.254093	0.000394981	0.00987	-0.368967	0.000136578	0.0019	-0.399425	0.580793	0.81194	-0.114874	0.374875	0.75592	0.145332	0.982393	0.86169	-0.0304582
332	A0A287BNF7;Q69DL0	16.0354	16.6335	15.7517	16.2992	16.2397	15.8894	16.0391	15.0319	16.1219	15.4823	16.2076	15.9441	16.2519	15.9148	15.6596	16.3142	16.0396	16.8747	16.4315	16.3472	16.4223	15.6696	15.8762	16.6896	A0A287BNF7;Q69DL0	C1QA	A0A287BNF7_PIG;C1QA_PIG	Complement C1q subcomponent subunit A	0.357564	0.84811	-0.336982	0.992603	0.92338	0.0343199	0.905266	0.83184	0.0979117	0.227586	0.56619	0.371302	0.106069	0.35557	-0.434894	0.97545	0.86169	0.0635918
333	A0A286ZRX6;F1RHK7	16.2215	16.1237	15.8894	15.951	15.7589	16.1613	15.7013	15.7541	16.1759	15.9666	15.6052	16.3452	15.4729	16.2293	15.7208	15.8815	15.8677	15.6225	15.7112	15.4917	15.9877	16.3298	16.2005	16.0318	A0A286ZRX6;F1RHK7	PEAR1	A0A286ZRX6_PIG;F1RHK7_PIG	Platelet endothelial aggregation receptor 1	1	0.85373	-0.0929181	0.278026	0.92338	-0.218516	0.727063	0.83184	-0.0588643	0.306515	0.67883	-0.125598	0.770601	0.85274	-0.0340538	0.90451	0.86169	0.159651
334	I3LQ84	16.038	16.2392	16.0744	16.2735	16.1462	16.2678	15.951	16.0447	16.0081	15.8016	16.6094	15.368	16.0165	15.9457	16.1836	15.827	16.1648	16.4042	15.6759	15.6913	15.3836	15.7243	15.452	15.5763	I3LQ84	COL6A2	I3LQ84_PIG	Collagen type VI alpha 2 chain	0.342594	0.84385	-0.209367	0.878472	0.92338	-0.0828656	1.81476e-05	0.00032	-0.589271	0.801916	0.81194	0.126501	0.0101385	0.07689	0.379904	0.00031469	0.00433	-0.506405
335	A0A287BH28;A0A5G2R9S9	15.9537	15.4558	14.8641	15.6645	15.7496	17.1166	16.7327	15.4313	15.7595	16.2425	16.8732	16.2302	16.7976	16.5049	14.6673	16.9081	15.5501	15.7442	16.6068	15.6943	15.9371	15.8839	15.5028	15.0305	A0A287BH28;A0A5G2R9S9	NA	A0A287BH28_PIG;A0A5G2R9S9_PIG	Ig-like domain-containing protein	0.664979	0.85373	0.410826	0.906498	0.92338	0.227998	0.999993	0.83184	-0.0248249	0.968625	0.81194	-0.182828	0.703164	0.85274	0.435651	0.916334	0.86169	-0.252823
336	A0A286ZPV9;A0A287A3N5;A0A287A5A5;A0A287AIH7;A0A287ALX2;A0A287AQB1;A0A287BHG0;F1SAE8	16.1994	15.5541	15.9842	16.1117	15.8173	15.6372	15.9612	15.8435	16.4258	15.546	15.8076	16.0078	15.8089	16.1082	15.8229	15.9172	16.1973	15.6889	15.5918	15.9659	15.4702	16.0739	16.0952	15.7922	A0A286ZPV9;A0A287A3N5;A0A287A5A5;A0A287AIH7;A0A287ALX2;A0A287AQB1;A0A287BHG0;F1SAE8	NRCAM	A0A286ZPV9_PIG;A0A287A3N5_PIG;A0A287A5A5_PIG;A0A287AIH7_PIG;A0A287ALX2_PIG;A0A287AQB1_PIG;A0A287BHG0_PIG;F1SAE8_PIG	Neuronal cell adhesion molecule	0.98363	0.85373	0.0479746	0.996556	0.92338	0.0399072	0.9458	0.83184	-0.0524656	0.998879	0.81194	-0.00806737	0.802297	0.85274	0.10044	0.86377	0.86169	-0.0923728
337	A0A287A5G2;A0A287AHA1;F1RN59	16.1979	16.0667	15.7191	16.0197	16.0331	16.1987	15.9413	15.9659	15.9582	15.936	15.935	15.8679	16.11	16.1598	16.0698	15.9855	16.3249	16.3622	16.001	16.1543	16.0097	16.1497	15.9296	15.8739	A0A287A5G2;A0A287AHA1;F1RN59	PAM	A0A287A5G2_PIG;A0A287AHA1_PIG;F1RN59_PIG	Peptidyl-glycine alpha-amidating monooxygenase isoform X1;Peptidyl-glycine alpha-amidating monooxygenase isoform X2;Peptidyl-glycine alpha-amidating monooxygenase isoform X1	0.383147	0.85373	-0.105139	0.153052	0.72716	0.129524	0.999999	0.83184	-0.0194988	0.00126176	0.00824	0.234664	0.402442	0.78207	-0.0856404	0.158423	0.57404	-0.149023
338	A0A5G2RLP2	16.4531	17.2408	15.7148	15.6181	15.5055	16.684	15.5321	15.837	16.0987	15.2902	16.7811	16.2788	17.1835	15.7846	15.2609	15.5635	15.4841	16.0565	16.0638	15.7819	16.6499	16.1587	16.5996	15.3393	A0A5G2RLP2	LGALS3BP	A0A5G2RLP2_PIG	Galectin 3 binding protein	0.887664	0.85373	-0.233085	0.788129	0.92338	-0.313859	0.99496	0.83184	-0.103867	0.996579	0.81194	-0.0807743	0.96799	0.85274	-0.129218	0.903823	0.86169	0.209992
339	A0A287AQ03;A0A5G2R114;I3LSX8	16.7072	15.7892	15.6481	16.255	15.3477	15.8537	16.0061	16.2014	16.1961	15.9928	15.9219	16.3055	15.5798	16.0156	15.4455	15.8969	16.0984	15.5399	15.7314	15.7595	15.6347	16.6046	15.9991	15.807	A0A287AQ03;A0A5G2R114;I3LSX8	CDH16	A0A287AQ03_PIG;A0A5G2R114_PIG;I3LSX8_PIG	Cadherin 16	0.274812	0.74617	0.170463	0.699936	0.92338	-0.170808	0.916954	0.83184	-0.0107715	0.0243916	0.10936	-0.341271	0.116466	0.37523	0.181234	0.979298	0.86169	0.160037
340	A0A287A900;A0A287AE16;A0A5G2R966;F1SF64	14.9616	15.2824	16.2093	15.527	15.6672	16.7741	15.6328	16.3688	15.7417	16.1216	15.3893	15.7939	15.1591	15.3727	16.5456	14.8359	14.4112	16.0602	15.2966	15.9844	14.519	16.384	16.3295	15.7693	A0A287A900;A0A287AE16;A0A5G2R966;F1SF64	SCIN	A0A287A900_PIG;A0A287AE16_PIG;A0A5G2R966_PIG;F1SF64_PIG	Adseverin	0.999087	0.85373	0.104409	0.661898	0.92338	-0.339483	0.999456	0.83184	-0.0231413	0.762029	0.81194	-0.443892	0.995563	0.85274	0.12755	0.605533	0.86169	0.316342
341	F1RL06	12.9944	19.1199	16.1875	10.2955	10.5984	17.3404	16.9931	13.1013	15.9369	12.8882	15.9877	13.4349	13.2484	12.0886	17.0958	11.9758	17.5946	10.2689	18.5781	17.0421	11.4975	16.3767	12.4309	14.9866	F1RL06	LOC100523213	F1RL06_PIG	Ig-like domain-containing protein	0.997181	0.85373	0.300992	0.952302	0.92338	-0.710671	0.985126	0.83184	0.729325	0.886644	0.81194	-1.01166	0.998603	0.85274	-0.428332	0.811291	0.86169	1.44
342	A0A287BLU7;A0A288CG53;A0A5G2QWH2;A0A5G2QYA4;A0A5G2R8N1	15.8185	16.2401	15.571	15.7221	15.3027	15.6193	16.2116	15.6436	16.4156	15.7391	16.0151	16.5764	16.0996	15.795	15.4203	15.3962	15.8126	15.364	15.6315	15.8224	16.2722	16.0948	16.1931	15.9527	A0A287BLU7;A0A288CG53;A0A5G2QWH2;A0A5G2QYA4;A0A5G2R8N1	SELL	A0A287BLU7_PIG;A0A288CG53_PIG;A0A5G2QWH2_PIG;A0A5G2QYA4_PIG;A0A5G2R8N1_PIG	L-selectin;Selectin L;Selectin L;L-selectin;L-selectin	0.00048975	0.00568	0.387943	0.955732	0.92338	-0.0643375	0.678016	0.83184	0.282157	7.56294e-05	0.00069	-0.45228	0.0603293	0.24977	0.105786	0.357189	0.86169	0.346494
343	Q28833	15.667	15.2412	16.6097	17.247	15.8121	16.9366	16.6124	16.8675	16.5375	16.9676	17.0974	16.7028	16.8865	15.0216	15.3356	14.8977	14.8247	16.0364	16.0098	17.0893	16.0433	16.0111	15.9349	15.0528	Q28833	VWF	VWF_PIG	von Willebrand factor (Fragment)	0.347434	0.84811	0.545284	0.0633981	0.4358	-0.751843	0.694833	0.83184	-0.228714	0.000210814	0.00176	-1.29713	0.0350808	0.17578	0.773998	0.523499	0.86169	0.523129
344	A0A5G2R9A7;F1SHP7	16.0613	15.7507	15.7962	15.8836	15.7691	15.6301	15.8872	15.5156	16.2894	15.9197	15.5986	16.4223	16.1057	15.9683	15.6474	15.6361	16.1447	15.6985	15.8862	15.6142	16.0731	15.9702	15.7092	15.7171	A0A5G2R9A7;F1SHP7	NCAM2	A0A5G2R9A7_PIG;F1SHP7_PIG	Neural cell adhesion molecule 2	0.203724	0.62592	0.123649	0.954994	0.92338	0.0516129	0.955506	0.83184	0.0131498	0.472199	0.81194	-0.0720357	0.112439	0.365	0.110499	0.733773	0.86169	-0.0384632
345	F1RWV2;P35624	16.1842	15.6968	16.1187	16.1719	15.907	16.4331	17.1738	17.1429	18.1757	17.1656	17.9393	16.223	15.028	15.4073	15.9274	15.63	15.5942	15.8687	16.6596	16.7362	16.3239	17.0277	16.3172	16.2692	F1RWV2;P35624	TIMP1	F1RWV2_PIG;TIMP1_PIG	Metalloproteinase inhibitor 1	2.39134e-08	0	1.21815	0.0419602	0.33568	-0.509302	0.333505	0.78317	0.470398	0	0	-1.72745	0.000489097	0.00748	0.747751	8.68667e-05	0.00171	0.9797
346	I3L5Z3	14.1168	15.6119	14.7631	13.6548	15.7835	16.2257	15.9624	15.2376	16.5351	15.9245	14.2738	17.0739	16.7831	16.3941	15.8996	15.7146	15.2804	16.5225	16.1072	15.71	16.5273	14.8466	14.7126	16.1903	I3L5Z3	PRG4	I3L5Z3_PIG	Uncharacterized protein	0.235775	0.69112	0.808578	0.0403387	0.33128	1.07309	0.262737	0.68955	0.656359	0.861023	0.81194	0.264513	1	0.85274	0.152219	0.86024	0.86169	-0.416732
347	A0A5G2Q7F8	16.3011	16.3024	15.8959	15.8318	15.1439	15.0991	15.4226	15.7382	17.2965	15.9096	15.1552	16.8423	16.839	15.5175	16.1446	15.5581	16.7201	16.0544	17.1003	14.619	17.1697	15.1884	16.2258	15.9042	A0A5G2Q7F8	NA	A0A5G2Q7F8_PIG	Ig-like domain-containing protein	0.879463	0.85373	0.298339	0.759686	0.92338	0.376567	0.873557	0.83184	0.272182	0.994865	0.81194	0.0782283	0.999982	0.85274	0.0261568	0.996867	0.86169	-0.104385
348	P04404	15.6488	15.6835	15.8098	15.375	15.7945	15.1036	17.3752	18.3451	17.288	17.271	17.3659	16.9955	15.3038	15.6543	15.7531	15.5925	16.026	16.0347	15.987	16.7349	16.2713	17.5237	17.0885	16.1085	P04404	CHGA	CMGA_PIG	Chromogranin-A (Fragment)	0	0	1.87091	0.873867	0.92338	0.158201	1.72519e-05	0.00031	1.04976	1.7808e-13	0	-1.71271	0.00327579	0.03382	0.82115	0.000380826	0.005	0.891559
349	A0A5G2R481;F1S3T0	12.7064	22.0673	21.2747	15.6738	21.6878	16.0873	21.2372	15.832	22.0304	22.169	15.5949	15.6168	16.2498	22.2112	22.2698	23.3274	22.0762	15.6931	14.5411	13.6072	20.9151	17.9182	21.0147	15.0711	A0A5G2R481;F1S3T0	GNPDA2	A0A5G2R481_PIG;F1S3T0_PIG	Glucosamine-6-phosphate isomerase	0.992738	0.85373	0.497168	0.749095	0.92338	2.05504	0.843624	0.83184	-1.07165	0.886034	0.81194	1.55788	0.695978	0.85274	1.56882	0.253289	0.76695	-3.1267
350	A0A480MVF5;P22298	15.8438	13.4627	15.6343	17.1913	16.4795	16.0689	13.2408	15.7544	16.1623	13.7322	14.0185	13.661	14.541	13.7798	16.0285	13.9241	14.5635	16.5312	13.0605	15.9504	14.0832	16.732	13.2618	16.8592	A0A480MVF5;P22298	SLPI	A0A480MVF5_PIG;SLPI_PIG	Antileukoproteinase;Antileukoproteinase (Fragment)	0.20312	0.62592	-1.35187	0.474036	0.92338	-0.885379	0.477728	0.83184	-0.788886	0.958058	0.81194	0.466487	0.966556	0.85274	-0.56298	0.999992	0.86169	0.0964931
351	A0A287AKU7;A0A287AVF2;A0A287BQB6;F1SMI5;I3LDR6;I3LUI4	16.6291	16.0829	15.5147	15.8268	15.1077	15.9409	16.3666	16.43	16.7336	16.7292	17.8408	16.3052	15.6465	15.6766	15.5049	15.3605	15.8621	16.0559	15.7485	16.1351	15.5935	16.4735	15.5185	15.9216	A0A287AKU7;A0A287AVF2;A0A287BQB6;F1SMI5;I3LDR6;I3LUI4	TNC	A0A287AKU7_PIG;A0A287AVF2_PIG;A0A287BQB6_PIG;F1SMI5_PIG;I3LDR6_PIG;I3LUI4_PIG	Tenascin	0.000701936	0.00783	0.883845	0.855544	0.92338	-0.16598	0.999986	0.83184	0.0480612	2.13479e-05	0.00024	-1.04983	0.00122825	0.01548	0.835784	0.838974	0.86169	0.214041
352	A0A5S8KUU6;P09889	15.5564	16.5293	16.492	13.3931	16.4489	15.927	14.3219	14.2756	16.2866	15.487	16.7386	17.1637	14.4837	16.9469	14.3128	15.5258	16.3235	14.1212	16.5699	14.4808	14.5432	16.1095	13.1452	16.8472	A0A5S8KUU6;P09889	ACP5	A0A5S8KUU6_PIG;PPA5_PIG	Tartrate-resistant acid phosphatase type 5	0.999998	0.85373	-0.0122069	0.940509	0.92338	-0.438795	0.963657	0.83184	-0.441776	0.945629	0.81194	-0.426589	0.967369	0.85274	0.429569	0.999809	0.86169	-0.00298089
353	A0A5G2RAJ8	15.59	16.5269	15.9106	15.7167	15.6812	15.6255	16.0389	15.8433	15.8395	15.6424	15.9294	16.0732	15.999	15.728	15.726	15.9098	15.3865	15.8658	16.1226	15.707	15.5069	15.3809	15.3529	15.5525	A0A5G2RAJ8	ME1	A0A5G2RAJ8_PIG	Malic enzyme	0.975432	0.85373	0.0526504	0.991727	0.92338	-0.0725987	0.578552	0.83184	-0.237981	0.896307	0.81194	-0.125249	0.333992	0.70674	0.290631	0.738849	0.86169	-0.165382
354	A0A5G2QHA4;A0A5G2QRX0;F1RQI0	16.273	15.6608	15.5733	16.0965	15.6929	16.0121	15.5948	15.7616	16.1912	15.6475	16.3165	15.8965	16.3517	15.6833	15.7265	15.3654	15.504	16.6303	15.4456	15.2092	15.4714	15.4923	15.2125	15.5981	A0A5G2QHA4;A0A5G2QRX0;F1RQI0	COL12A1	A0A5G2QHA4_PIG;A0A5G2QRX0_PIG;F1RQI0_PIG	Collagen type XII alpha 1 chain	0.999695	0.85373	0.016597	0.999996	0.92338	-0.00788049	0.0442972	0.20236	-0.479895	0.999436	0.81194	-0.0244775	0.0344368	0.17375	0.496492	0.0397766	0.20751	-0.472015
355	F1SNF3	15.6243	15.9461	15.7592	15.8647	15.6053	15.9508	15.8475	16.0269	16.8016	16.1641	15.886	16.6982	15.8462	15.9767	15.6442	15.7494	16.7199	15.1641	16.2099	16.2015	15.5963	15.5917	16.2369	16.2344	F1SNF3	PODXL	F1SNF3_PIG	Podocalyxin	0.00119866	0.0121	0.445649	0.986534	0.92338	0.0583382	0.995331	0.83184	0.220059	0.00461372	0.02708	-0.38731	0.00988492	0.07664	0.22559	0.999758	0.86169	0.16172
356	A0A286ZYX8	15.8019	16.0585	15.3912	15.6815	15.4692	15.6316	15.8441	16.9576	16.2047	15.5394	16.3473	15.5865	16.0279	15.9048	15.6353	16.384	15.71	16.142	15.5254	15.727	15.5365	15.6437	15.6384	15.694	A0A286ZYX8	ALDOA	A0A286ZYX8_PIG	Fructose-bisphosphate aldolase	0.081199	0.33656	0.407642	0.275427	0.92338	0.295019	0.999806	0.83184	-0.0448131	0.942729	0.81194	-0.112623	0.0793974	0.29975	0.452455	0.236964	0.74122	-0.339832
357	F1SFD1	15.3419	16.0711	15.6039	15.9839	15.664	16.4113	16.2631	16.161	16.5356	16.0596	16.2337	15.8419	15.5955	15.1636	15.877	15.3989	15.4662	15.7693	15.5733	15.7799	15.5286	16.125	16.0012	15.7128	F1SFD1	TIE1	F1SFD1_PIG	Tyrosine kinase with immunoglobulin like and EGF like domains 1	0.0810322	0.33656	0.336479	0.0537707	0.39603	-0.300907	0.778681	0.83184	-0.0592322	5.41883e-06	7e-05	-0.637386	0.011235	0.08024	0.395711	0.428817	0.86169	0.241675
358	A0A287B490	16.3545	15.8836	16.0802	15.8252	15.9296	15.5421	16.2922	15.4818	15.7399	16.1292	16.331	16.0584	15.2383	15.5842	15.7975	15.2104	15.7144	15.3366	15.5912	15.6614	15.8523	15.4841	14.7648	14.9117	A0A287B490	OAF	A0A287B490_PIG	Uncharacterized protein	0.984276	0.85373	0.0695279	0.0291252	0.2758	-0.455668	0.0154724	0.08983	-0.558289	0.0120146	0.06127	-0.525196	0.00894837	0.07235	0.627817	0.988396	0.86169	-0.102621
359	A0A286ZTA8;A0A287BPM1;A0A480VXI4;F1RXW0;Q59IP2	16.1126	15.6258	14.9335	16.3337	15.5108	16.5657	15.1509	15.3679	16.008	13.9863	16.1928	13.7624	13.4656	14.526	14.7149	12.7834	14.7843	15.5761	13.0852	13.6692	13.8951	13.922	14.3898	14.2253	A0A286ZTA8;A0A287BPM1;A0A480VXI4;F1RXW0;Q59IP2	COL5A2	A0A286ZTA8_PIG;A0A287BPM1_PIG;A0A480VXI4_PIG;F1RXW0_PIG;Q59IP2_PIG	Collagen type V alpha 2 chain;Collagen type V alpha 2 chain;Collagen alpha-2(V) chain preproprotein;Collagen alpha-2(V) chain preproprotein;Collagen alpha-2(V) chain	0.269311	0.73824	-0.768975	0.00159156	0.02787	-1.53864	2.4823e-05	0.00042	-1.98259	0.256371	0.61893	-0.769667	0.0235185	0.13711	1.21361	0.704071	0.86169	-0.443946
360	A0A5G2QGW3;F1RTB4	16.2257	15.6979	16.1243	16.1256	16.1803	16.1009	15.3507	15.9667	15.8573	15.5975	15.9635	16.1474	15.2683	16.0964	15.4391	15.1327	15.8247	15.849	15.1455	15.2577	15.5263	15.8695	15.4135	15.8918	A0A5G2QGW3;F1RTB4	WFIKKN2	A0A5G2QGW3_PIG;F1RTB4_PIG	WAP, follistatin/kazal, immunoglobulin, kunitz and netrin domain containing 2;WAP, follistatin/kazal, immunoglobulin, kunitz and netrin domain containing 2	0.342234	0.84385	-0.261936	0.0176261	0.19117	-0.474084	0.0045478	0.03456	-0.558394	0.573782	0.81194	-0.212147	0.313425	0.67489	0.296458	0.964218	0.86169	-0.0843105
361	I3LG75	16.0199	15.5215	15.7878	15.8681	15.5514	15.6131	15.1873	15.1864	15.388	15.781	14.9504	16.4567	15.4245	16.0588	15.0987	15.3393	15.5081	15.0868	14.9796	15.5005	15.4846	16.1142	16.2007	15.825	I3LG75	LOC110259374	I3LG75_PIG	MLV-related proviral Env polyprotein	0.819137	0.85373	-0.235352	0.449995	0.92338	-0.307642	0.97048	0.83184	-0.0428822	0.934539	0.81194	-0.0722899	0.980331	0.85274	-0.19247	0.748163	0.86169	0.264759
362	F1S3Q8	16.4518	16.1347	15.7895	16.7017	16.3317	16.1414	16.7169	16.0025	16.6462	16.6869	16.1522	16.4263	15.6226	16.2908	15.7537	15.7808	14.652	15.2572	16.5864	16.988	16.4872	15.9671	16.9019	16.2256	F1S3Q8	VNN3	F1S3Q8_PIG	Pantetheinase	0.828704	0.85373	0.180033	0.00740906	0.10111	-0.698937	0.520495	0.83184	0.267575	0.000249889	0.00204	-0.87897	0.949422	0.85274	-0.0875418	2.13443e-05	0.00045	0.966512
363	A0A287AD97;A0A287AZ35;A0A287B9M5;F1RMD4	16.6393	15.2477	16.8439	16.0091	15.3656	16.5852	15.7135	16.3562	17.9307	16.3124	16.5563	15.3013	17.7434	16.7489	15.4019	15.5382	15.5418	17.7295	16.5601	14.9085	15.9643	15.8442	16.3079	16.7871	A0A287AD97;A0A287AZ35;A0A287B9M5;F1RMD4	THSD1	A0A287AD97_PIG;A0A287AZ35_PIG;A0A287B9M5_PIG;F1RMD4_PIG	Thrombospondin type 1 domain containing 1	0.947565	0.85373	0.246581	0.902699	0.92338	0.335458	0.996468	0.83184	-0.0531329	0.998948	0.81194	0.0888771	0.878834	0.85274	0.299714	0.801664	0.86169	-0.388591
364	A0A5G2QK30;A0A5G2QND0;J9JIK8;P80895	15.6112	17.3572	14.9045	14.4912	14.7486	16.1427	14.2642	15.2798	17.8338	14.8121	14.6816	15.5678	17.9826	18.674	14.8008	15.8572	14.8353	14.1435	16.4855	14.5068	18.2976	16.0692	16.7361	17.9964	A0A5G2QK30;A0A5G2QND0;J9JIK8;P80895	PCMT1	A0A5G2QK30_PIG;A0A5G2QND0_PIG;J9JIK8_PIG;PIMT_PIG	Protein-L-isoaspartate O-methyltransferase;Protein-L-isoaspartate(D-aspartate) O-methyltransferase;Protein-L-isoaspartate O-methyltransferase;Protein-L-isoaspartate(D-aspartate) O-methyltransferase	0.899415	0.85373	-0.13601	0.847515	0.92338	0.506339	0.701199	0.83184	1.13936	0.999676	0.81194	0.642348	0.982794	0.85274	-1.27537	0.989446	0.86169	0.633024
365	A0A286ZVG3;Q95274	15.8914	15.1287	14.7286	15.372	15.306	15.2186	15.9702	17.1416	16.4402	16.0267	16.6856	15.697	15.9473	15.1566	15.2795	16.7358	15.449	15.5519	15.4398	15.7779	15.8895	15.8934	15.8789	15.6098	A0A286ZVG3;Q95274	LOC110257905;TMSB4	A0A286ZVG3_PIG;TYB4_PIG	Thymosin beta;Thymosin beta-4	3.22714e-05	0.00055	1.05269	0.341528	0.92338	0.412482	0.274189	0.70748	0.474018	0.0254301	0.1133	-0.640204	0.0488772	0.21592	0.578668	0.998138	0.86169	0.061536
366	A0A286ZIM1	15.1005	15.3078	15.9878	16.2773	15.5831	17.6137	15.0364	15.8753	14.9801	16.7811	15.0212	16.8208	15.607	14.9965	16.1345	15.2418	16.9379	17.4899	15.5432	16.4138	15.2352	13.8777	16.7262	15.8566	A0A286ZIM1	NA	A0A286ZIM1_PIG	Ig-like domain-containing protein	0.968434	0.85373	-0.22587	0.999609	0.92338	0.089591	0.818848	0.83184	-0.369573	0.945058	0.81194	0.315461	0.973194	0.85274	0.143703	0.751388	0.86169	-0.459164
367	F1SSE8	16.2971	15.1825	15.3853	15.894	15.7522	15.7168	15.6764	15.5864	15.2908	15.4062	15.7963	15.5245	15.1365	15.5566	15.3642	15.2588	15.7335	15.3013	14.9829	15.5542	15.2294	15.5917	15.4413	15.5325	F1SSE8	COL15A1	F1SSE8_PIG	Collagen type XV alpha 1 chain	0.681052	0.85373	-0.15789	0.122154	0.62141	-0.312812	0.126201	0.42903	-0.315988	0.690055	0.81194	-0.154922	0.683191	0.85274	0.158099	0.999981	0.86169	-0.00317613
368	A0A286ZR66;A0A286ZVK1	16.6688	14.0283	15.3748	15.4234	14.4679	17.2236	16.8877	18.6962	17.9829	18.6476	16.0203	17.7788	17.1358	16.2395	16.1421	17.3403	17.1082	16.1029	18.3729	18.4175	19.0659	18.9811	18.7225	18.6157	A0A286ZR66;A0A286ZVK1	F11	A0A286ZR66_PIG;A0A286ZVK1_PIG	Coagulation factor XI	6.98176e-06	0.00015	2.13778	0.0754794	0.48984	1.14701	1.04901e-10	0	3.16479	0.0755987	0.25704	-0.990776	0.220198	0.55178	-1.02701	0.000114704	0.00211	2.01779
369	H6UWK6	15.0991	15.0019	15.608	15.0896	15.5253	15.2243	15.6933	15.7136	16.237	15.7915	16.0593	15.0922	15.0684	15.2257	15.191	15.7617	15.293	15.9395	15.6881	15.7718	17.5077	15.4213	14.5659	15.5578	H6UWK6	OLFML3	H6UWK6_PIG	Olfactomedin like 3	0.311259	0.80198	0.506427	0.973712	0.92338	0.155159	0.256222	0.67571	0.494057	0.567251	0.81194	-0.351268	0.998858	0.85274	0.0123701	0.464841	0.86169	0.338898
370	A0A287A4W0;A0A287A5T4;A0A287AW81	15.3485	12.8362	13.4882	14.3651	16.4186	14.1357	16.1493	16.6848	14.7237	15.6735	15.5532	17.5141	13.5916	14.9986	13.5767	16.1064	12.8859	15.0688	13.4544	15.9694	14.2689	15.5391	15.1107	16.3263	A0A287A4W0;A0A287A5T4;A0A287AW81	FLNA	A0A287A4W0_PIG;A0A287A5T4_PIG;A0A287AW81_PIG	Filamin A	0.0277052	0.15639	1.61774	0.99987	0.92338	-0.0606928	0.451742	0.83184	0.67942	0.0354367	0.14829	-1.67843	0.610881	0.85274	0.938319	0.474235	0.86169	0.740113
371	A0A5G2Q6R4	16.5428	15.8282	16.3855	16.3789	15.901	16.4721	15.473	15.6756	16.2425	15.0692	16.49	15.2809	15.4543	15.853	15.8182	14.952	15.3953	15.0712	14.259	14.9044	15.5538	15.1215	15.7053	15.4215	A0A5G2Q6R4	HMCN2	A0A5G2Q6R4_PIG	Hemicentin 2	0.0561156	0.26025	-0.546211	2.76307e-05	0.00128	-0.82741	1.68594e-08	0	-1.0905	0.205994	0.52939	-0.281199	0.00726122	0.06286	0.54429	0.410272	0.86169	-0.263091
372	A0A287B654	16.3244	15.9739	14.9136	15.2042	15.2065	15.5737	15.4115	15.4525	15.9025	15.6747	15.82	15.7814	15.7129	16.3024	15.5216	16.1314	15.6554	15.8894	14.7375	15.4219	15.8954	16.184	15.6778	15.7482	A0A287B654	NENF	A0A287B654_PIG	Neudesin neurotrophic factor	0.40536	0.85373	0.141035	0.261818	0.92338	0.336133	0.999733	0.83184	0.0780951	0.996417	0.81194	0.195098	0.449385	0.82178	0.0629399	0.245543	0.74873	-0.258038
373	A0A5G2R2D6	15.426	15.6534	16.0493	16.0228	16.045	15.6743	16.2631	16.0051	15.8409	16.1022	15.7264	15.6655	15.3836	16.834	16.4052	15.6097	16.0552	16.0704	15.8091	15.91	15.123	15.5528	15.6572	15.0896	A0A5G2R2D6	CNTN4	A0A5G2R2D6_PIG	Contactin 4	0.910739	0.85373	0.122076	0.442292	0.92338	0.247902	0.61711	0.83184	-0.28817	0.838464	0.81194	0.125825	0.24614	0.58758	0.410246	0.0316617	0.17921	-0.536072
374	A0A287A371;A0A287BJE4;A0A288CFZ8;Q4Z8N7	15.3886	15.2792	15.8479	16.214	15.7551	15.9234	15.5677	15.3489	15.6088	15.4436	15.0512	15.6357	15.4641	15.9654	15.9907	15.5507	15.9243	14.8169	15.0929	15.1649	15.4952	14.8994	15.8463	15.6498	A0A287A371;A0A287BJE4;A0A288CFZ8;Q4Z8N7	PLA2G7	A0A287A371_PIG;A0A287BJE4_PIG;A0A288CFZ8_PIG;Q4Z8N7_PIG	Platelet-activating factor acetylhydrolase	0.34244	0.84385	-0.292062	0.810552	0.92338	-0.116028	0.0545776	0.23641	-0.376616	0.871319	0.81194	0.176034	0.792887	0.85274	0.0845544	0.320243	0.86169	-0.260588
375	F1S6B5	15.7859	15.4243	15.0472	16.1006	15.132	16.0096	15.4059	15.7459	15.9227	15.287	16.1755	15.6023	15.4586	15.485	15.3742	14.9039	15.3572	15.6405	15.1194	15.4053	15.7995	15.4398	15.3698	15.2342	F1S6B5	FMOD	F1S6B5_PIG	Fibromodulin	0.922201	0.85373	0.106604	0.519332	0.92338	-0.213377	0.557748	0.83184	-0.18859	0.190272	0.50574	-0.319981	0.219829	0.55178	0.295194	0.999991	0.86169	0.0247868
376	A0A287ANZ8;A0A287B2P9;B9ZSM8	16.4411	15.5373	15.3454	15.9055	15.7496	16.1536	15.9542	15.937	16.3803	15.9889	16.433	15.4376	15.45	15.1962	15.7412	15.3826	15.7894	15.7842	15.7255	15.394	15.6826	15.6344	15.2318	15.8579	A0A287ANZ8;A0A287B2P9;B9ZSM8	THY1	A0A287ANZ8_PIG;A0A287B2P9_PIG;B9ZSM8_PIG	Thy-1 cell surface antigen;Thy-1 cell surface antigen;CD90 protein	0.746448	0.85373	0.166421	0.229333	0.88307	-0.298144	0.281663	0.71653	-0.267695	0.0200786	0.09205	-0.464564	0.0295795	0.15844	0.434116	0.999866	0.86169	0.0304482
377	A0A287AWY5	15.8765	15.7004	15.6711	15.9018	15.6887	15.714	15.6402	15.7732	15.8209	15.8671	15.8239	15.384	14.9399	15.5247	15.4556	14.8907	15.4211	15.4545	15.0303	15.4282	15.6067	15.8308	15.5913	15.4238	A0A287AWY5	PCDHGA4	A0A287AWY5_PIG	Protocadherin gamma subfamily A, 4	0.963592	0.85373	-0.0405083	3.16644e-05	0.00134	-0.477641	0.0679039	0.27692	-0.273541	0.000461919	0.00346	-0.437133	0.237491	0.57494	0.233033	0.185839	0.63864	0.2041
378	A0A287AT81;F1SL34;K7GLE8	15.9617	15.8504	15.6379	16.0134	15.6164	15.7731	15.8327	15.5435	15.8077	16.0406	15.5996	16.0975	15.3229	15.7355	15.6944	15.5634	15.8562	15.4861	15.6512	15.5138	15.6386	15.7095	15.613	15.738	A0A287AT81;F1SL34;K7GLE8	ALCAM	A0A287AT81_PIG;F1SL34_PIG;K7GLE8_PIG	Activated leukocyte cell adhesion molecule	0.991378	0.85373	0.0114517	0.121707	0.62141	-0.199067	0.223273	0.62427	-0.164784	0.0644565	0.22968	-0.210518	0.142577	0.42427	0.176236	0.995847	0.86169	0.0342822
379	F1RVS9	16.5477	17.0055	15.2373	16.4224	15.3704	16.0467	15.913	14.9917	15.2	15.8914	16.9261	15.3377	15.5133	15.9085	15.5425	15.8611	15.8021	16.4801	15.5191	15.2555	15.0063	14.8311	14.2256	15.1715	F1RVS9	PI16	F1RVS9_PIG	SCP domain-containing protein	0.540802	0.85373	-0.395003	0.876541	0.92338	-0.253705	0.00357758	0.02795	-1.10346	0.939995	0.81194	0.141298	0.145074	0.43011	0.708459	0.0305882	0.17427	-0.849757
380	A0A5G2R599;F1S715	15.1117	15.4077	16.1575	16.4526	12.3182	15.4347	16.538	15.3486	16.4553	12.5008	15.3655	16.2242	15.0953	15.6234	11.6815	16.4877	15.1347	15.3366	16.2126	14.964	15.5415	15.5965	16.4592	16.2136	A0A5G2R599;F1S715	FUCA2	A0A5G2R599_PIG;F1S715_PIG	Alpha-L-fucosidase	0.825009	0.85373	0.258321	0.989884	0.92338	-0.253852	0.93272	0.83184	0.684183	0.656117	0.81194	-0.512173	0.995914	0.85274	-0.425862	0.79944	0.86169	0.938035
381	A0A5G2QE21;A0A5G2QLL3;F1RLZ2	16.5461	15.4911	15.6773	15.5484	15.5081	15.7345	16.2808	16.0694	15.2708	15.6222	16.2378	16.1869	15.4404	16.1086	15.4169	15.094	15.8046	15.6756	15.431	15.47	15.9576	15.8639	15.1155	15.0734	A0A5G2QE21;A0A5G2QLL3;F1RLZ2	SPINK5	A0A5G2QE21_PIG;A0A5G2QLL3_PIG;F1RLZ2_PIG	Serine peptidase inhibitor, Kazal type 5;Serine peptidase inhibitor, Kazal type 5;Serine peptidase inhibitor, Kazal type 5	0.41905	0.85373	0.193722	0.83956	0.92338	-0.16091	0.739564	0.83184	-0.265669	0.0943469	0.30672	-0.354633	0.0956879	0.33894	0.459392	0.995667	0.86169	-0.104759
382	A0A5G2QNX5	16.4675	15.7412	15.6139	15.7147	15.3567	15.5423	16.212	15.873	15.5876	16.2125	15.981	16.3194	15.6378	16.2347	15.7655	15.6496	15.7631	15.4635	15.2965	15.4924	15.9126	15.9151	15.1513	15.2781	A0A5G2QNX5	DSC2	A0A5G2QNX5_PIG	Desmocollin 2	0.0114105	0.07649	0.291566	0.999121	0.92338	0.0130144	0.266749	0.69471	-0.23168	0.0186519	0.08697	-0.278552	5.71904e-05	0.00107	0.523246	0.196148	0.66095	-0.244694
383	A0A287AFA5;F1SRK6;Q29092	15.5864	15.8456	16.2936	15.6489	16.0999	15.4591	15.7579	16.0312	16.0266	15.5955	15.8573	15.5397	15.4252	15.6723	15.8842	15.7931	15.7931	15.6684	15.929	15.8199	15.5841	15.9176	15.6025	15.5091	A0A287AFA5;F1SRK6;Q29092	HSP90B1	A0A287AFA5_PIG;F1SRK6_PIG;ENPL_PIG	Endoplasmin	0.963764	0.85373	-0.0209059	0.76004	0.92338	-0.116206	0.964969	0.83184	-0.0952093	0.961631	0.81194	-0.0952997	1	0.85274	0.0743034	0.963327	0.86169	0.0209963
384	P18137	14.4924	16.2234	14.1108	16.2981	14.0314	15.8611	15.8482	15.4637	16.2764	15.8885	17.7322	15.0734	13.6027	15.4981	15.8114	15.5777	13.5443	14.1016	15.3385	13.7622	18.4547	13.938	15.71	13.6306	P18137	LALBA	LALBA_PIG	Alpha-lactalbumin	0.547689	0.85373	0.877517	0.84509	0.92338	-0.480231	0.994995	0.83184	-0.0305144	0.142705	0.41888	-1.35775	0.422154	0.80219	0.908032	0.940502	0.86169	0.449717
385	A6ZIC9	16.4644	16.0361	15.9586	15.3627	15.8539	15.8755	16.4238	15.6108	16.0736	16.1826	16.2998	16.1575	15.4621	15.9704	15.4623	15.7875	15.7762	15.2309	15.7455	15.9926	15.8393	15.7358	15.3202	15.7679	A6ZIC9	IGFBP6	A6ZIC9_PIG	Insulin-like growth factor-binding protein 6	0.543215	0.85373	0.199487	0.198375	0.81819	-0.310287	0.701483	0.83184	-0.191641	0.0053141	0.03051	-0.509774	0.0828442	0.30735	0.391128	0.822212	0.86169	0.118646
386	F1SUE4	15.7045	15.7327	15.4078	15.7105	15.45	15.3112	15.2762	15.3052	15.6423	15.18	15.4881	15.3955	15.5716	15.4811	15.4996	15.6749	15.4117	15.6621	15.0824	15.4628	15.0759	15.2735	15.2331	15.2439	F1SUE4	ASPN	F1SUE4_PIG	Asporin	0.148175	0.53194	-0.171558	0.999967	0.92338	-0.00260457	0.00036583	0.00413	-0.324177	0.168479	0.46841	0.168954	0.216592	0.5508	0.152619	0.000282501	0.00415	-0.321573
387	A0A286ZWS0;A0A5G2QTG5	15.1085	15.5212	19.0699	15.5198	15.1677	15.5603	14.6554	15.4987	15.9087	15.5651	15.4563	15.951	15.9108	18.1905	15.7292	15.7918	15.2894	15.9513	16.114	15.8817	15.5191	15.0363	15.5089	15.0607	A0A286ZWS0;A0A5G2QTG5	SH3BGRL3	A0A286ZWS0_PIG;A0A5G2QTG5_PIG	SH3 domain-binding glutamic acid-rich-like protein;SH3 domain binding glutamate rich protein like 3	0.778964	0.85373	-0.485361	0.991778	0.92338	0.15262	0.800141	0.83184	-0.471107	0.60957	0.81194	0.637982	1	0.85274	-0.0142539	0.615962	0.86169	-0.623728
388	F1S3D5	16.5276	15.8709	16.1838	15.9161	16.2555	15.6118	16.1053	16.2541	15.4511	15.8985	16.2925	15.9485	15.8708	15.5363	16.5632	15.9474	15.3802	16.3923	15.9003	16.2961	15.8703	16.4305	16.0841	15.8307	F1S3D5	LMAN2	F1S3D5_PIG	Lectin, mannose binding 2	0.608911	0.85373	-0.0692809	0.913901	0.92338	-0.112581	0.705769	0.83184	0.0076926	0.936615	0.81194	-0.0433	0.152151	0.43756	-0.0769735	0.308218	0.85491	0.120274
389	A0A287AL17;A0A287BJV9;F1S8X2;I3LPI4	15.6737	15.8411	15.8194	16.2537	15.9746	16.1682	15.3788	15.1025	15.1753	15.31	14.9388	16.0713	15.6117	15.8208	15.1554	14.8562	16.0066	15.5968	15.3814	15.5732	15.4726	15.6883	15.9247	15.4251	A0A287AL17;A0A287BJV9;F1S8X2;I3LPI4	CRTAC1	A0A287AL17_PIG;A0A287BJV9_PIG;F1S8X2_PIG;I3LPI4_PIG	Cartilage acidic protein 1	0.00169863	0.01616	-0.625677	0.0551981	0.40334	-0.447237	0.166607	0.51396	-0.377566	0.708778	0.81194	0.17844	0.479308	0.84346	-0.24811	0.976117	0.86169	0.0696708
390	A0A287BJ65;F1RRX1	15.4122	15.4802	15.537	15.6314	15.4355	15.8423	16.6492	16.1997	16.979	16.7486	17.1635	16.9564	15.0519	15.6809	15.3407	14.926	15.7342	15.4176	15.9525	16.6343	16.874	16.6359	16.2797	16.1848	A0A287BJ65;F1RRX1	LCN2	A0A287BJ65_PIG;F1RRX1_PIG	Lipocln_cytosolic_FA-bd_dom domain-containing protein	8.88178e-16	0	1.2263	0.432133	0.92338	-0.197905	7.53622e-07	2e-05	0.870439	0	0	-1.42421	0.0358961	0.17782	0.355864	1.99132e-11	0	1.06834
391	Q29041	13.1951	16.4134	15.8468	15.6251	15.5403	14.9535	16.7575	16.0817	15.5446	15.8105	16.4003	14.8954	15.9134	14.3202	15.1131	16.1953	14.2708	15.801	16.6093	14.8569	16.3011	16.1638	14.0458	15.6809	Q29041	FCN2	FCN2_PIG	Ficolin-2	0.527189	0.85373	0.652633	1	0.92338	0.00660107	0.900671	0.83184	0.34727	0.539959	0.81194	-0.646032	0.924589	0.85274	0.305362	0.897969	0.86169	0.340669
392	F1RQ17	15.4373	15.4202	15.4954	15.668	15.2614	15.0806	15.8939	15.87	16.2312	15.7348	15.7853	15.3303	15.3195	15.4351	15.4472	15.2018	14.7794	15.1027	15.0869	15.3559	15.2257	15.0495	15.3232	15.0924	F1RQ17	ADGRF5	F1RQ17_PIG	Adhesion G protein-coupled receptor F5	0.00248453	0.02268	0.413751	0.370425	0.92338	-0.179563	0.233546	0.64042	-0.204897	2.10651e-06	3e-05	-0.593314	4.33644e-07	2e-05	0.618647	0.988956	0.86169	-0.0253338
393	A0A5G2QGA4	16.0089	15.9187	17.4004	16.6615	16.1493	16.7073	17.6445	17.6402	16.4271	18.8602	17.0056	17.5513	15.5525	16.1612	16.8622	16.5341	14.9496	15.6017	16.8846	17.2209	17.545	16.8603	16.5409	16.9429	A0A5G2QGA4	CRP	A0A5G2QGA4_PIG	C-reactive protein	0.0100849	0.07151	1.04713	0.219604	0.85988	-0.530789	0.318599	0.77082	0.524768	6.22758e-06	8e-05	-1.57792	0.592645	0.85274	0.52236	0.00165138	0.01766	1.05556
394	A0A287AL92;F1S0J3	15.0244	15.3348	15.752	14.9493	15.7689	15.3614	15.196	15.1862	15.2695	15.5977	14.5587	15.2827	15.2485	15.5865	15.8071	15.6536	15.5414	15.4494	15.2835	15.6778	15.5964	15.2862	15.7554	15.4625	A0A287AL92;F1S0J3	C4BPB	A0A287AL92_PIG;F1S0J3_PIG	Complement component 4 binding protein beta;C4b-binding protein beta chain isoform 1	0.596941	0.85373	-0.183348	0.624994	0.92338	0.182634	0.805046	0.83184	0.145146	0.0698581	0.24154	0.365981	0.150547	0.43756	-0.328494	0.99217	0.86169	-0.0374876
395	A0A287AK31;A0A5G2R880;F1RGS0	15.5483	15.2639	15.6928	16.392	15.6028	16.4026	15.0057	15.2873	15.5202	14.7369	15.9169	14.3432	15.1505	14.3845	15.4978	14.8495	15.5562	15.8315	15.2495	15.0831	13.2109	14.6982	15.4554	15.0931	A0A287AK31;A0A5G2R880;F1RGS0	THBS3	A0A287AK31_PIG;A0A5G2R880_PIG;F1RGS0_PIG	Thrombospondin 3	0.0189089	0.11506	-0.682032	0.0910789	0.53835	-0.605405	0.00118755	0.01182	-1.01869	0.918897	0.81194	0.0766268	0.855473	0.85274	0.33666	0.422153	0.86169	-0.413287
396	A0A5G2QDJ9;F1RPU6	16.0554	15.5759	15.0531	15.771	15.1297	15.52	15.7062	15.4794	15.109	15.5682	15.8854	15.9225	15.7087	15.7733	15.3863	15.3893	15.483	15.1407	15.1174	15.352	15.2407	15.3152	14.9061	15.4834	A0A5G2QDJ9;F1RPU6	MPZL1	A0A5G2QDJ9_PIG;F1RPU6_PIG	Myelin protein zero like 1	0.676173	0.85373	0.0942705	0.996859	0.92338	-0.0372713	0.140829	0.45282	-0.281714	0.553813	0.81194	-0.131542	0.0131563	0.08948	0.375984	0.195702	0.66095	-0.244442
397	A0A287AEA2;A0A5G2RB35	16.0164	15.6313	16.3813	15.0752	16.315	15.4046	16.1781	16.242	15.3388	16.2074	16.1818	15.9395	15.5807	15.7035	16.661	15.6454	15.8812	16.6032	16.1809	16.2912	15.5386	16.1041	14.5869	15.5178	A0A287AEA2;A0A5G2RB35	PPIC	A0A287AEA2_PIG;A0A5G2RB35_PIG	Peptidyl-prolyl cis-trans isomerase	0.999988	0.85373	0.210643	0.586512	0.92338	0.208543	0.779797	0.83184	-0.100699	0.63672	0.81194	-0.00209978	0.834946	0.85274	0.311342	0.993876	0.86169	-0.309242
398	F1SAM0;F1SAM2	15.9481	15.142	15.2736	14.8194	17.4268	17.715	15.7802	17.0275	15.1515	15.4409	15.7666	15.7476	15.4426	15.6307	15.2818	15.5633	15.5864	15.6669	15.235	18.1505	15.7904	14.9249	14.2969	15.0056	F1SAM0;F1SAM2	DSC1	F1SAM0_PIG;F1SAM2_PIG	Desmocollin 1	0.967153	0.85373	-0.2351	0.783138	0.92338	-0.525539	0.871836	0.83184	-0.486937	0.963257	0.81194	-0.290439	0.989393	0.85274	0.251836	0.998514	0.86169	0.0386026
399	I3LB93	15.9127	16.1014	14.8278	15.6653	15.2803	15.719	14.868	15.1363	15.5434	15.4574	15.7335	15.7964	15.4271	15.9064	15.1866	14.992	15.2753	15.0456	14.7348	14.5228	15.3281	15.3568	15.1361	15.5392	I3LB93	NOTCH3	I3LB93_PIG	Notch receptor 3	0.999974	0.85373	-0.16194	0.359345	0.92338	-0.278945	0.00492048	0.03577	-0.481444	0.41747	0.80916	-0.117005	0.0139993	0.093	0.319504	0.27263	0.80305	-0.202499
400	A0A287AAF8;A0A287AQV3;A0A287BKL5;I3L5D6	13.886	16.0823	16.0102	6.91355	12.9115	16.3615	15.7929	16.3064	17.5359	15.4369	15.4447	15.2822	15.4228	15.9408	0	16.1341	15.2731	15.5339	16.1321	16.6483	15.4524	15.7092	16.7081	16.0481	A0A287AAF8;A0A287AQV3;A0A287BKL5;I3L5D6	PLD3	A0A287AAF8_PIG;A0A287AQV3_PIG;A0A287BKL5_PIG;I3L5D6_PIG	Phospholipase D family member 3	0.638016	0.85373	2.27234	0.99619	0.92338	-0.64338	0.475205	0.83184	2.42221	0.503062	0.81194	-2.91572	0.99129	0.85274	-0.149866	0.327099	0.86169	3.06559
401	A0A286ZTL0;A0A5G2QI17;Q28989	15.5405	15.0399	15.6898	15.1124	14.7839	15.2765	15.4304	15.4234	15.0432	15.6717	15.3602	15.6093	15.6319	14.7542	15.414	15.6627	15.9007	15.1145	15.5673	15.5751	14.8346	15.6337	14.4663	15.4456	A0A286ZTL0;A0A5G2QI17;Q28989	AMBN	A0A286ZTL0_PIG;A0A5G2QI17_PIG;AMBN_PIG	Ameloblastin	0.784283	0.85373	0.182551	0.878033	0.92338	0.172527	0.99745	0.83184	0.0132975	0.997797	0.81194	-0.0100243	0.688071	0.85274	0.169254	0.780789	0.86169	-0.159229
402	A0A286ZKC5;A0A286ZR68;A0A287A9T4;A0A287BDM6;A0A287BK26;F1RQU2	15.8643	14.5465	15.2914	15.1635	15.1562	15.7326	14.4094	17.3889	16.2691	15.5745	16.8876	14.9556	15.8384	15.1761	14.9267	16.1219	14.7302	15.6764	14.9948	15.3781	15.8188	15.3715	15.7724	14.2773	A0A286ZKC5;A0A286ZR68;A0A287A9T4;A0A287BDM6;A0A287BK26;F1RQU2	HSP90AB1	A0A286ZKC5_PIG;A0A286ZR68_PIG;A0A287A9T4_PIG;A0A287BDM6_PIG;A0A287BK26_PIG;F1RQU2_PIG	Heat shock protein 90 alpha family class B member 1	0.355867	0.84811	0.621781	0.997873	0.92338	0.11921	0.98918	0.83184	-0.0235958	0.470777	0.81194	-0.502571	0.225843	0.56101	0.645377	0.958131	0.86169	-0.142806
403	F1S7Z7	15.5469	15.1901	14.6012	15.5173	14.7621	15.1827	14.4132	14.5401	14.1775	13.0631	14.3453	14.3313	14.9409	14.9847	15.3193	15.2002	15.1681	15.4198	14.6098	14.837	14.6521	14.83	14.6862	15.2094	F1S7Z7	ANGPTL3	F1S7Z7_PIG	Fibrinogen C-terminal domain-containing protein	5.83527e-07	2e-05	-0.988289	0.985772	0.92338	0.0387754	0.475209	0.83184	-0.329319	1.65567e-07	0	1.02706	0.00132676	0.01601	-0.65897	0.264568	0.79005	-0.368094
404	A0A5G2QYD9;A0A5G2RAT8;P00172	14.799	14.0172	14.453	15.8447	15.6437	15.5813	13.7068	14.6142	14.7605	14.3562	13.709	17.5705	14.0388	14.1269	14.4744	15.5669	14.7273	14.5057	18.6962	15.7583	16.897	18.6926	15.666	17.9101	A0A5G2QYD9;A0A5G2RAT8;P00172	CYB5A	A0A5G2QYD9_PIG;A0A5G2RAT8_PIG;CYB5_PIG	Cytochrome b5	0.983692	0.85373	-0.270302	0.879242	0.92338	-0.483185	0.000682093	0.00704	2.21354	0.981975	0.81194	-0.212883	0.000194037	0.00346	-2.48384	1.43654e-05	0.00034	2.69672
405	F1RRV3	16.4527	15.5639	15.0262	16.8031	15.3381	14.2148	14.9259	14.2645	15.2976	16.7918	17.5829	17.4794	14.744	17.2138	13.954	17.2128	14.5446	16.6043	16.9975	15.0523	14.1435	15.3146	14.3043	17.0071	F1RRV3	TG	THYG_PIG	Thyroglobulin	0.87932	0.85373	0.490561	0.982915	0.92338	0.145768	0.998807	0.83184	-0.0965902	0.982791	0.81194	-0.344793	0.940645	0.85274	0.587151	0.996475	0.86169	-0.242358
406	A0A287BIL8	15.6184	15.4752	15.3285	15.6235	15.2596	15.7556	15.9307	16.3287	16.2301	15.515	16.2438	15.8722	15.0168	15.3175	15.0253	15.1575	15.1413	15.3596	15.1945	15.4858	15.8968	15.9814	15.9467	15.9759	A0A287BIL8	HSPA5	A0A287BIL8_PIG	Endoplasmic reticulum chaperone BiP	0.000855212	0.00917	0.509981	0.045435	0.35586	-0.340447	0.396313	0.83184	0.236746	4.09266e-10	0	-0.850427	0.142373	0.42427	0.273235	0.000140672	0.00247	0.577193
407	A0A5G2R9N8;I3LEZ3	15.8397	15.2881	15.1579	15.746	15.4184	15.7594	15.8748	15.6735	15.6534	15.3388	15.3512	15.5648	15.2772	14.914	15.012	15.0042	15.8466	15.3012	15.3423	15.332	14.9586	15.4017	15.3973	15.4384	A0A5G2R9N8;I3LEZ3	LSAMP	A0A5G2R9N8_PIG;I3LEZ3_PIG	Limbic system associated membrane protein	0.974004	0.85373	0.0411851	0.108284	0.5946	-0.309051	0.316127	0.77082	-0.223207	0.0399011	0.15579	-0.350236	0.166612	0.46662	0.264392	0.96433	0.86169	0.0858442
408	A0A5G2QNB8;K7GKU8	15.4408	13.5978	14.1815	15.7889	14.3243	15.6588	14.4332	15.2279	14.2683	15.4255	15.4022	13.9839	15.8512	14.5324	15.6423	14.9259	15.4691	14.4929	15.9002	15.6825	16.0103	15.9024	15.8991	15.9761	A0A5G2QNB8;K7GKU8	MASP2	A0A5G2QNB8_PIG;K7GKU8_PIG	Uncharacterized protein	0.998929	0.85373	-0.0418578	0.876774	0.92338	0.320296	0.0210327	0.11129	1.06309	0.808508	0.81194	0.362154	0.0136402	0.09204	-1.10495	0.124774	0.49012	0.742793
409	A0A5G2R9F7	15.2324	15.8921	14.9748	15.0361	14.8259	15.262	15.8363	16.7878	16.0953	16.109	16.5737	15.2628	16.1132	15.6471	15.0738	17.3354	15.4647	15.7685	15.0631	15.3508	15.709	15.7351	14.831	15.095	A0A5G2R9F7	FKBP1A	A0A5G2R9F7_PIG	Uncharacterized protein	0.00763199	0.05795	0.906935	0.0864514	0.52385	0.696577	0.998566	0.83184	0.0934615	0.846457	0.81194	-0.210358	0.0173285	0.11082	0.813474	0.125939	0.49012	-0.603116
410	A0A287AR98;A0A5G2QV81	16.0032	15.5058	15.4145	15.3028	15.4674	15.578	15.8618	15.3432	15.3355	15.2817	15.2052	15.765	15.2419	15.918	15.1922	15.0582	15.7835	15.309	15.3023	15.1316	15.6763	15.3527	15.2903	15.3918	A0A287AR98;A0A5G2QV81	SBSN	A0A287AR98_PIG;A0A5G2QV81_PIG	Suprabasin	0.999686	0.85373	-0.0798682	0.766469	0.92338	-0.128154	0.425332	0.83184	-0.187777	0.73427	0.81194	-0.0482863	0.452603	0.82178	0.107909	0.928603	0.86169	-0.0596224
411	A0A286ZND5;F1S3U9	15.6377	15.4706	15.5818	15.5009	15.4955	15.3716	15.7599	16.613	15.8505	15.8521	16.0203	15.4224	16.0007	16.0417	15.866	17.4574	16.0033	16.2171	15.2038	15.4299	15.3593	15.3856	15.3078	15.5763	A0A286ZND5;F1S3U9	PRDX1	A0A286ZND5_PIG;F1S3U9_PIG	Peroxiredoxin	0.1407	0.51325	0.410036	0.000631598	0.01302	0.754685	0.863891	0.83184	-0.132593	0.308511	0.67883	0.344649	0.0226282	0.13374	0.542629	1.54099e-05	0.00035	-0.887278
412	A0A287B7B9;A0A287BEM9;A0A5G2QVI0;A0A5S6FYV9;A0A5S6I1G3;Q07717	15.9496	15.4185	15.3603	15.5253	14.9845	16.3965	16.3673	16.3824	16.5217	16.3312	16.7837	15.9452	15.4986	15.1118	15.6082	14.8885	15.5975	14.6435	15.8707	16.6535	16.1115	16.5098	16.2928	16.6288	A0A287B7B9;A0A287BEM9;A0A5G2QVI0;A0A5S6FYV9;A0A5S6I1G3;Q07717	B2M	A0A287B7B9_PIG;A0A287BEM9_PIG;A0A5G2QVI0_PIG;A0A5S6FYV9_PIG;A0A5S6I1G3_PIG;B2MG_PIG	Beta-2-microglobulin	2.17067e-05	0.0004	0.782794	0.0417148	0.33568	-0.381088	0.00310588	0.02497	0.738738	1.03462e-12	0	-1.16388	0.73156	0.85274	0.0440561	1.83545e-09	0	1.11983
413	A0A287BB44;A0A5G2Q7Y9	16.1053	14.1776	14.2053	15.2363	13.7567	15.3256	16.1336	15.6443	14.177	15.6438	16.5793	15.134	15.8326	14.7764	16.3833	14.0382	15.3307	14.6935	15.3207	15.5042	16.1765	15.1506	15.2936	15.4365	A0A287BB44;A0A5G2Q7Y9	MMRN2	A0A287BB44_PIG;A0A5G2Q7Y9_PIG	Multimerin 2	0.240128	0.69357	0.750875	0.836154	0.92338	0.374648	0.43321	0.83184	0.679204	0.736413	0.81194	-0.376227	0.990147	0.85274	0.0716707	0.894596	0.86169	0.304556
414	A0A5G2QV00;F1SN77	15.4136	15.97	15.6223	15.7726	15.5399	16.9713	16.1468	13.5991	15.952	15.9774	15.7034	15.5186	15.3632	15.3246	15.3236	14.1586	15.1895	15.5706	14.8529	15.4556	15.4789	15.2961	15.1871	15.4435	A0A5G2QV00;F1SN77	OSMR	A0A5G2QV00_PIG;F1SN77_PIG	Oncostatin M receptor	0.580726	0.85373	-0.39874	0.0633261	0.4358	-0.72661	0.125542	0.42903	-0.595948	0.616175	0.81194	-0.327871	0.772409	0.85274	0.197208	0.995458	0.86169	0.130663
415	F1RWA3;G9K122;K7GPB4	15.6498	15.5634	15.0372	15.1393	15.0634	15.4302	16.007	16.1456	16.65	15.9407	16.3415	16.0009	15.2701	15.0863	14.8912	15.1766	15.6071	15.1051	15.3992	15.9705	15.9334	15.8522	16.0152	16.0112	F1RWA3;G9K122;K7GPB4	MRC1	F1RWA3_PIG;G9K122_PIG;K7GPB4_PIG	Uncharacterized protein;Macrophage mannose receptor 1;Uncharacterized protein	2.62013e-14	0	0.867084	0.596886	0.92338	-0.124469	0.00163606	0.01505	0.549763	0	0	-0.991553	0.00119049	0.01523	0.317322	7.17677e-06	0.00018	0.674232
416	A0A286ZNV0;I3LUD1	15.3221	15.4053	14.8665	15.1274	14.9373	15.3422	16.3324	15.9144	15.5312	15.6956	15.9098	15.7636	14.8577	15.0953	15.5061	14.8733	14.4566	15.5365	15.3474	15.373	15.794	15.7996	14.6524	15.3304	A0A286ZNV0;I3LUD1	SOD3	A0A286ZNV0_PIG;I3LUD1_PIG	Superoxide dismutase [Cu-Zn]	0.000423495	0.00498	0.691024	0.970626	0.92338	-0.112554	0.374692	0.83184	0.215982	5.20393e-05	0.00051	-0.803578	0.104577	0.35424	0.475041	0.156436	0.56922	0.328537
417	F1RLB2	14.0172	14.519	15.9412	16.3466	16.2108	0	15.1458	15.7816	15.2943	16.4597	15.594	14.1761	14.8425	14.2429	16.1112	15.9736	15.586	13.0713	14.1806	15.1753	14.3674	15.5289	16.2461	13.6613	F1RLB2	SPINK9	F1RLB2_PIG	Serine peptidase inhibitor, Kazal type 9	0.447524	0.85373	2.56945	0.592097	0.92338	2.13212	0.629529	0.83184	2.02079	0.996382	0.81194	-0.437333	0.995017	0.85274	0.548661	0.99999	0.86169	-0.111328
418	A0A288CFT0;D0G7F6	16.2708	14.99	14.3244	15.0329	14.9364	15.0054	14.7042	17.3144	15.7689	15.274	15.8322	14.6635	15.8476	15.4125	15.3484	16.3209	15.4314	15.9983	14.9248	14.7436	15.6637	15.1783	14.685	15.0711	A0A288CFT0;D0G7F6	TPI1	A0A288CFT0_PIG;D0G7F6_PIG	Triosephosphate isomerase	0.446876	0.85373	0.499524	0.215614	0.85512	0.633199	0.999998	0.83184	-0.04891	0.968326	0.81194	0.133675	0.463614	0.83121	0.548434	0.207939	0.69171	-0.682109
419	A0A287AAU1;F1S279	15.9656	15.1186	14.8594	14.7967	14.5005	14.8378	15.4259	15.3873	15.0246	14.5412	15.7404	15.1565	14.7314	15.0422	14.6617	14.2228	15.0199	14.8045	14.4928	14.9144	15.0219	14.9506	14.0676	14.5809	A0A287AAU1;F1S279	CCN3	A0A287AAU1_PIG;F1S279_PIG	Cellular communication network factor 3	0.588207	0.85373	0.19954	0.588073	0.92338	-0.266011	0.46972	0.83184	-0.34173	0.0631413	0.22697	-0.46555	0.0579996	0.24247	0.54127	0.994775	0.86169	-0.0757194
420	A0A286ZV56;A0A287AP40;A0A287BIN3;A0A288CG38	15.4233	15.3691	15.3241	15.7839	15.3416	15.6286	15.2959	15.3679	15.3263	15.6013	15.1712	15.6129	14.4831	15.3293	15.1129	14.9778	15.5889	14.8687	14.6757	15.1864	15.266	15.2199	15.1386	15.1235	A0A286ZV56;A0A287AP40;A0A287BIN3;A0A288CG38	CACNA2D1	A0A286ZV56_PIG;A0A287AP40_PIG;A0A287BIN3_PIG;A0A288CG38_PIG	Calcium voltage-gated channel auxiliary subunit alpha2delta 1	0.921917	0.85373	-0.0825534	0.00509155	0.075	-0.418333	0.011981	0.07365	-0.376767	0.0364921	0.15073	-0.33578	0.0680801	0.27264	0.294213	0.997991	0.86169	0.0415668
421	A0A287ALI8	15.3823	14.9387	15.0792	14.9685	15.1466	14.7688	15.508	15.1633	14.9596	15.0784	15.4952	15.789	15.7066	15.522	15.7914	15.332	15.8583	15.2655	15.8922	15.5022	15.4379	15.5576	15.1444	15.0086	A0A287ALI8	SCRG1	A0A287ALI8_PIG	Stimulator of chondrogenesis 1	0.162148	0.55376	0.284885	0.000567465	0.01284	0.531949	0.0123456	0.07533	0.376453	0.192084	0.50741	0.247064	0.720607	0.85274	-0.091568	0.796385	0.86169	-0.155496
422	A0A5G2QN91	14.9183	15.1416	15.8085	14.0124	15.3044	14.362	15.6904	16.3691	15.6827	15.7838	16.4587	15.7656	14.6915	14.5112	15.3488	17.1357	14.0473	14.6867	14.7451	15.7385	15.5882	15.5862	14.301	14.036	A0A5G2QN91	LOC100158011	A0A5G2QN91_PIG	BPTI/Kunitz inhibitor domain-containing protein	0.0460059	0.22817	1.03385	0.989608	0.92338	0.145683	0.999825	0.83184	0.0746246	0.105272	0.32416	-0.888171	0.0694494	0.27428	0.959229	0.99571	0.86169	-0.071058
423	F1S573	14.0868	15.0375	14.2968	14.3779	15.6762	15.7991	14.8222	15.5361	15.1406	11.1154	16.0654	14.7196	14.3231	16.0045	14.4744	13.9844	15.5577	15.4976	14.569	14.9908	16.8694	16.0019	16.1062	16.3155	F1S573	LOC100153854	F1S573_PIG	Alpha-amylase	0.950674	0.85373	-0.312472	0.993697	0.92338	0.0945713	0.302953	0.75829	0.929785	0.857991	0.81194	0.407044	0.108121	0.35939	-1.24226	0.426147	0.86169	0.835214
424	A0A5G2R860	15.4099	15.6788	14.6215	15.3027	15.0409	15.3699	14.7879	14.414	15.2093	14.7392	15.084	15.1844	15.2451	15.0107	15.1884	15.3035	14.6613	15.8993	15.418	15.0289	15.0588	15.5146	14.6792	15.2303	A0A5G2R860	MMP2	A0A5G2R860_PIG	Uncharacterized protein	0.240695	0.69357	-0.334141	0.999973	0.92338	-0.019226	0.998661	0.83184	-0.0822997	0.228661	0.56714	0.314915	0.346254	0.7185	-0.251841	0.997111	0.86169	-0.0630737
425	E9KYT3;P24854	15.5897	15.1007	14.9281	14.4946	15.0183	14.6565	15.3706	15.3915	15.2296	15.0049	15.4644	15.3862	15.2544	15.216	14.7996	14.8896	15.1837	14.996	15.852	15.658	15.6596	16.1076	15.44	15.4465	E9KYT3;P24854	IGFBP4	E9KYT3_PIG;IBP4_PIG	Insulin-like growth factor-binding protein 4	0.022513	0.13414	0.343201	0.689193	0.92338	0.0918855	1.36299e-10	0	0.729286	0.310935	0.67883	-0.251316	0.000811512	0.01122	-0.386085	8.10928e-08	0	0.637401
426	F1RJ72	14.8906	15.835	15.5024	15.0523	14.1554	16.8177	15.4532	14.797	15.3116	14.7882	15.4032	15.8412	14.6989	16.5101	14.3913	14.1942	14.729	15.603	14.2561	14.9828	15.7069	13.9464	14.6336	14.6209	F1RJ72	CNMD	F1RJ72_PIG	Chondromodulin	0.991794	0.85373	-0.109846	0.825126	0.92338	-0.354505	0.367472	0.82805	-0.684475	0.939218	0.81194	-0.244659	0.536206	0.85274	0.574629	0.855776	0.86169	-0.32997
427	F1S8V7	14.8621	14.925	15.2766	14.9731	15.1945	15.4214	14.8372	15.3068	15.3776	15.1414	15.1577	15.3864	15.423	15.4878	15.2728	15.8665	15.5187	14.9776	15.7184	15.7747	15.8549	15.6689	15.8452	15.9985	F1S8V7	CPN1	F1S8V7_PIG	Carboxypeptidase N catalytic chain	0.818622	0.85373	0.0923951	0.0358164	0.31356	0.315614	1.96315e-08	0	0.701311	0.262341	0.62411	0.223219	1.64769e-06	5e-05	-0.608916	0.00434465	0.0396	0.385697
428	A0A287A502	15.2482	15.4556	15.3568	15.5528	15.3562	15.7609	14.4992	15.2613	15.6534	15.3745	15.4764	15.365	15.0417	15.3526	15.2682	14.8883	15.5768	15.5172	15.0285	15.077	14.9192	15.3224	14.8128	15.1698	A0A287A502	LAMA2	A0A287A502_PIG	Uncharacterized protein	0.552064	0.85373	-0.183426	0.468443	0.92338	-0.180934	0.0105288	0.06669	-0.400129	0.998958	0.81194	0.00249248	0.262883	0.61254	0.216702	0.312226	0.85491	-0.219195
429	A0A5G2QTR9	15.5783	15.5611	14.2197	14.842	14.8814	14.9978	15.1914	17.099	15.7807	15.2861	16.5771	15.1779	15.2184	15.1494	15.1092	15.8263	15.5593	15.474	15.3277	15.5552	15.4626	15.0412	15.0634	15.2454	A0A5G2QTR9	YWHAB	A0A5G2QTR9_PIG	Tyrosine 3-monooxygenase/tryptophan 5-monooxygenase activation protein beta	0.0086265	0.06381	0.838619	0.438475	0.92338	0.376036	0.648228	0.83184	0.269196	0.359994	0.73091	-0.462583	0.230864	0.5655	0.569423	0.990186	0.86169	-0.106841
430	A0A287BSC3;A0A480UBK2	15.0176	15.6694	15.2481	15.6976	15.4953	15.1434	16.0793	15.5539	15.7587	15.2733	15.4557	16.1418	15.4831	15.5744	15.015	15.022	15.3915	15.2902	15.3607	15.1704	14.6246	15.8074	14.8211	15.2472	A0A287BSC3;A0A480UBK2	ALPL	A0A287BSC3_PIG;A0A480UBK2_PIG	Alkaline phosphatase	0.0634594	0.28298	0.331897	0.995649	0.92338	-0.0825118	0.591433	0.83184	-0.206662	0.0370303	0.15075	-0.414409	0.00367432	0.03705	0.538559	0.716874	0.86169	-0.12415
431	A0A286ZRH3;I3LD22	16.1879	15.2637	15.2741	14.5568	15.201	14.6834	15.9037	15.641	15.3184	15.0357	15.4054	16.0534	15.0402	15.3577	15.243	14.6686	15.2484	15.3222	15.185	14.5617	15.3254	15.3087	14.3865	15.1872	A0A286ZRH3;I3LD22	COCH	A0A286ZRH3_PIG;I3LD22_PIG	Cochlin	0.170535	0.56277	0.365113	0.997374	0.92338	-0.0477834	0.997256	0.83184	-0.202053	0.256039	0.61893	-0.412896	0.128146	0.39528	0.567166	0.97872	0.86169	-0.15427
432	A0A287ALB0;A0A287AM33;A0A287BJE5;F1SIW0	15.8276	15.7581	14.5213	15.2297	15.0273	15.5629	14.4214	14.9166	15.6041	14.4248	15.2195	15.1053	15.8023	14.8864	13.3948	15.2866	15.3818	14.9904	13.6925	16.0535	15.5521	15.4053	15.2743	15.357	A0A287ALB0;A0A287AM33;A0A287BJE5;F1SIW0	STAB1	A0A287ALB0_PIG;A0A287AM33_PIG;A0A287BJE5_PIG;F1SIW0_PIG	Stabilin 1	0.946845	0.85373	-0.372541	0.555046	0.92338	-0.364081	0.656722	0.83184	-0.0986889	0.885859	0.81194	0.00846055	0.9398	0.85274	-0.273852	0.999624	0.86169	0.265392
433	A0A286ZVB7;P45846	16.1223	15.9368	16.1838	15.1359	15.7425	15.3756	15.9042	15.0499	14.6979	15.5236	15.1626	16.137	15.7181	15.9524	15.5057	15.4932	15.7876	15.4435	15.7124	15.5138	15.4491	15.2211	15.3164	15.0055	A0A286ZVB7;P45846	DPT	A0A286ZVB7_PIG;DERM_PIG	Dermatopontin	0.217974	0.65834	-0.33698	0.995931	0.92338	-0.099423	0.472506	0.83184	-0.379758	0.332811	0.70611	0.237557	0.974734	0.85274	0.0427782	0.59442	0.86169	-0.280335
434	A0A5G2RJ79	14.4954	14.7104	14.8991	14.065	15.4529	13.8189	15.1244	15.1116	13.3947	15.3392	14.8537	13.1147	15.3697	15.8524	15.4022	15.6389	15.4411	15.8531	15.8078	15.3493	13.7043	15.2965	14.4768	14.6278	A0A5G2RJ79	APOC2	A0A5G2RJ79_PIG	Uncharacterized protein	0.647565	0.85373	-0.0839237	0.000820548	0.01586	1.01928	0.112144	0.40174	0.30345	7.32907e-06	9e-05	1.1032	0.00998026	0.07664	-0.387374	0.497743	0.86169	-0.715831
435	A0A287AX04;A0A5G2QIG1;A0A5K1UHA8;F1RYU5;K7GSK1	15.4299	15.5119	15.2321	15.0842	15.5352	15.1247	15.6907	15.5272	15.29	15.3835	14.9969	15.2789	14.2522	15.208	15.3737	14.4787	14.2869	15.1603	15.2107	15.7299	15.4433	15.1197	14.7994	15.2078	A0A287AX04;A0A5G2QIG1;A0A5K1UHA8;F1RYU5;K7GSK1	ART3	A0A287AX04_PIG;A0A5G2QIG1_PIG;A0A5K1UHA8_PIG;F1RYU5_PIG;K7GSK1_PIG	NAD(P)(+)--arginine ADP-ribosyltransferase	0.999993	0.85373	0.0415231	0.00364713	0.05641	-0.526366	0.909792	0.83184	-0.0678599	0.00538433	0.03051	-0.567889	0.915212	0.85274	0.109383	0.000349234	0.00473	0.458506
436	A0A287AB52;A0A287AZP0	15.0617	16.2839	15.4446	12.561	16.1165	12.2896	15.7046	15.8904	13.1037	15.319	16.0031	10.6845	15.3361	11.9985	15.5539	15.2588	12.484	16.0569	15.1603	14.5228	14.1405	14.3962	11.3018	18.8175	A0A287AB52;A0A287AZP0	MFAP4	A0A287AB52_PIG;A0A287AZP0_PIG	Microfibril associated protein 4	0.871856	0.85373	-0.175338	0.99916	0.92338	-0.178198	0.872321	0.83184	0.096968	0.923824	0.81194	-0.00286045	0.497308	0.85274	-0.272306	0.802363	0.86169	0.275166
437	A0A286ZX40;A0A287B8H8;A0A287BCN4;A0A5G2RAG0;A0A5G2RIA6;A0A5S6IH59;I3LAP5;P37111	17.0124	13.2854	15.8531	13.5899	13.8698	16.6057	15.3714	14.1314	13.5225	15.0142	15.648	15.9119	15.5337	16.8198	14.0532	15.9281	14.4346	16.0411	13.7588	13.7793	15.2982	15.0283	15.3204	14.8371	A0A286ZX40;A0A287B8H8;A0A287BCN4;A0A5G2RAG0;A0A5G2RIA6;A0A5S6IH59;I3LAP5;P37111	ACY1	A0A286ZX40_PIG;A0A287B8H8_PIG;A0A287BCN4_PIG;A0A5G2RAG0_PIG;A0A5G2RIA6_PIG;A0A5S6IH59_PIG;I3LAP5_PIG;ACY1_PIG	Aminoacylase-1	0.9982	0.85373	-0.102815	0.875289	0.92338	0.432358	0.954209	0.83184	-0.365718	0.792165	0.81194	0.535173	0.984801	0.85274	0.262903	0.571885	0.86169	-0.798076
438	A0A287B4U1;A0A287B799;A0A287BJD1;A0A287BPJ1;I3L893	13.9915	16.927	15.4781	13.925	17.5987	13.1554	17.519	14.7905	14.8199	17.7497	15.9422	17.1044	14.5688	14.7076	16.7087	11.5318	13.1701	15.9578	12.5344	12.3224	17.7054	16.7575	15.8999	17.1186	A0A287B4U1;A0A287B799;A0A287BJD1;A0A287BPJ1;I3L893	GDI1	A0A287B4U1_PIG;A0A287B799_PIG;A0A287BJD1_PIG;A0A287BPJ1_PIG;I3L893_PIG	Rab GDP dissociation inhibitor	0.772981	0.85373	1.14168	0.881089	0.92338	-0.738493	0.914136	0.83184	0.210427	0.335638	0.7079	-1.88017	0.993453	0.85274	0.931253	0.503197	0.86169	0.948921
439	A0A075B7I5	15.1253	16.4585	14.0704	15.8497	15.2516	13.5034	16.9519	14.745	13.6182	14.8272	14.216	17.063	17.454	15.6241	14.3729	15.4721	3.86912	0	15.2186	15.2222	15.1625	15.3504	16.0504	15.6714	A0A075B7I5	NA	A0A075B7I5_PIG	Ig-like domain-containing protein	0.999665	0.85373	0.193712	0.190172	0.79855	-3.91112	0.999208	0.83184	0.402741	0.155945	0.44561	-4.10483	0.999984	0.85274	-0.20903	0.144336	0.53877	4.31386
440	A0A287AXR5;A0A480PLY3	15.8982	15.5196	14.2351	14.926	14.8323	15.1916	15.3565	17.1904	15.9118	15.0381	16.4066	15.2502	15.0554	15.1296	14.9759	15.9	14.9022	15.6117	14.9734	15.3112	15.6851	15.3413	14.9925	15.2553	A0A287AXR5;A0A480PLY3	YWHAZ	A0A287AXR5_PIG;A0A480PLY3_PIG	Tyrosine 3-monooxygenase/tryptophan 5-monooxygenase activation protein zeta;14-3-3 protein zeta/delta	0.0415297	0.21084	0.75846	0.904264	0.92338	0.162018	0.865324	0.83184	0.159338	0.213227	0.54115	-0.596442	0.282805	0.63116	0.599122	0.999483	0.86169	-0.00267971
441	F1S981	15.8604	13.707	13.3623	15.1307	13.8079	15.2885	14.415	15.1509	14.1655	14.9638	15.3255	14.266	15.2174	13.9861	15.2376	13.0485	15.0999	13.4882	15.36	15.2875	15.7999	15.5951	15.2638	15.5757	F1S981	SPON1	F1S981_PIG	Spondin 1	0.961764	0.85373	0.188296	0.926922	0.92338	-0.179871	0.154069	0.4806	0.954188	0.689198	0.81194	-0.368167	0.365059	0.74666	-0.765893	0.0292392	0.17109	1.13406
442	A0A286ZNH3	16.7365	15.0682	16.3795	15.1634	16.4467	15.8792	15.5475	15.1159	15.4098	15.4141	14.9705	14.1013	15.4974	16.2012	15.8415	15.9213	14.3323	14.3521	15.4509	15.6963	14.2026	14.0941	15.3667	15.0531	A0A286ZNH3	RIDA	A0A286ZNH3_PIG	2-iminobutanoate/2-iminopropanoate deaminase	0.0872054	0.358	-0.8524	0.384706	0.92338	-0.587956	0.0525898	0.23018	-0.968296	0.880146	0.81194	0.264444	0.992875	0.85274	0.115896	0.736825	0.86169	-0.38034
443	Q9N1F5	15.2085	15.6018	14.977	15.3667	15.2348	15.2587	14.9057	15.8657	15.7086	15.9402	15.3693	14.5109	15.9865	15.6243	15.6448	16.8201	15.6378	15.9713	15.431	15.3621	15.2446	15.368	15.5895	15.4953	Q9N1F5	GSTO1	GSTO1_PIG	Glutathione S-transferase omega-1	0.946268	0.85373	0.108821	0.00658468	0.0912	0.672903	0.979093	0.83184	0.140498	0.0365739	0.15073	0.564082	0.999042	0.85274	-0.0316768	0.0242845	0.14707	-0.532405
444	A0A287AB01;A0A5G2QBI5;A0A5G2QRV2;I3LNI2	13.9393	15.9835	15.0548	14.0694	17.4791	14.8347	16.011	15.8164	14.6324	14.2325	15.7704	14.9426	15.5109	22.5156	16.5481	15.2494	22.3552	22.151	14.5301	17.5349	14.8736	12.5984	14.0671	14.3801	A0A287AB01;A0A5G2QBI5;A0A5G2QRV2;I3LNI2	TFG	A0A287AB01_PIG;A0A5G2QBI5_PIG;A0A5G2QRV2_PIG;I3LNI2_PIG	Trafficking from ER to golgi regulator	1	0.85373	0.00742852	0.000245279	0.00734	3.82824	0.99999	0.83184	-0.562769	0.000302253	0.00235	3.82081	0.999996	0.85274	0.570197	0.000297902	0.0043	-4.39101
445	P20112	15.3685	15.4725	15.1499	16.042	15.4591	15.4169	14.9591	15.3552	15.4799	15.0806	15.5134	14.707	14.364	14.7829	14.9948	14.2762	15.1613	14.9781	14.8612	14.9467	14.8352	13.999	14.5051	14.6562	P20112	SPARC	SPRC_PIG	SPARC	0.310762	0.80198	-0.302286	0.000158264	0.00525	-0.72529	8.11977e-06	0.00015	-0.850939	0.0712457	0.2453	-0.423003	0.0100157	0.07664	0.548653	0.876819	0.86169	-0.125649
446	A0A287ADZ3	16.9353	14.0244	15.6661	15.7478	15.602	15.5506	15.7987	14.2209	14.455	15.0626	16.1877	15.0471	14.7041	14.832	14.8409	15.925	15.3707	13.4256	15.1518	15.3889	16.0544	14.2058	14.7787	15.6681	A0A287ADZ3	LY6G6C	A0A287ADZ3_PIG	Lymphocyte antigen 6 complex locus protein G6c	0.674183	0.85373	-0.459036	0.206313	0.83776	-0.737996	0.619671	0.83184	-0.379778	0.837138	0.81194	-0.27896	0.999366	0.85274	-0.0792586	0.892192	0.86169	0.358218
447	I3LU13	15.3269	15.2611	15.3261	15.7401	15.3653	15.7258	15.2863	15.0649	15.2985	15.0013	15.0392	15.4757	15.0998	15.0981	15.3165	14.8885	15.5597	15.0731	15.0084	14.9675	14.9474	15.0868	15.1521	14.0812	I3LU13	CHST3	I3LU13_PIG	Sulfotransferase	0.249516	0.70253	-0.263232	0.174808	0.7652	-0.284907	0.00033233	0.00387	-0.583657	0.997186	0.81194	-0.0216753	0.103248	0.35252	0.320425	0.142753	0.53517	-0.298749
448	P80054	13.9781	14.4334	14.6947	15.9217	15.2279	15.8276	15.692	14.5385	17.1237	15.0621	15.4027	16.3173	16.0404	15.0497	16.587	14.767	15.2532	15.7087	15.4727	15.4762	15.5541	14.5661	14.6307	14.5951	P80054	PR39	PR39_PIG	Antibacterial protein PR-39	0.273117	0.74392	0.675494	0.560192	0.92338	0.553757	0.996163	0.83184	0.0352584	0.963122	0.81194	-0.121737	0.200707	0.52601	0.640236	0.418823	0.86169	-0.518499
449	A0A287AXU0;A0A5G2R699;I3LP72	14.9785	14.8395	15.2147	15.0356	15.729	14.9585	15.9025	16.44	15.5225	15.5553	16.496	15.0718	14.5977	14.6302	15.6552	14.5804	15.0019	15.5687	15.0845	15.6977	15.5099	15.3235	14.7757	14.9794	A0A287AXU0;A0A5G2R699;I3LP72	ELN	A0A287AXU0_PIG;A0A5G2R699_PIG;I3LP72_PIG	Elastin	0.0158808	0.09946	0.70538	0.861036	0.92338	-0.120272	0.253102	0.6696	0.10248	0.00132189	0.00856	-0.825652	0.765322	0.85274	0.6029	0.0416946	0.21493	0.222752
450	A0A287AW67;F1SD70	15.1664	14.5281	15.154	14.7626	14.871	14.2771	14.7651	15.1247	15.1974	15.0928	15.1421	14.6561	15.1108	15.3742	15.2598	15.337	16.0269	15.0527	14.5859	14.8585	15.2447	14.7808	14.8414	14.7179	A0A287AW67;F1SD70	LGMN	A0A287AW67_PIG;F1SD70_PIG	Legumain	0.446376	0.85373	0.203157	0.000594825	0.0129	0.567005	0.999819	0.83184	0.0449863	0.100451	0.3179	0.363848	0.573838	0.85274	0.158171	0.00133368	0.015	-0.522019
451	A0A286ZWK2;F1S9Q1;F1S9Q3	14.8617	15.1624	14.4888	14.6333	14.9753	15.2216	15.1798	17.5078	16.4096	15.284	16.6406	14.7032	15.7911	15.3261	15.5399	17.0287	15.2108	15.9624	15.1044	15.0686	15.246	15.4533	15.0461	14.8905	A0A286ZWK2;F1S9Q1;F1S9Q3	HSPA8	A0A286ZWK2_PIG;F1S9Q1_PIG;F1S9Q3_PIG	Uncharacterized protein	0.0104678	0.07362	1.06365	0.0443135	0.35148	0.919317	0.932265	0.83184	0.244293	0.966555	0.81194	-0.144337	0.0749705	0.28941	0.819361	0.186616	0.63877	-0.675024
452	A0A287BE47	15.9895	15.4797	15.0092	15.3459	15.1572	15.343	15.6639	14.1622	15.3413	15.3201	15.8374	15.8439	15.0008	15.505	15.0005	14.4728	15.076	14.648	15.4294	15.4398	15.8034	14.9487	15.5403	15.5865	A0A287BE47	CCL14	A0A287BE47_PIG	C-C motif chemokine	0.981333	0.85373	-0.0259763	0.138618	0.67237	-0.436915	0.999753	0.83184	0.0705989	0.0670192	0.23371	-0.410939	0.993652	0.85274	-0.0965752	0.129157	0.49933	0.507514
453	A0A5G2QLY2;A0A5G2RDK0;F1SSL7	15.5363	14.8459	15.1836	14.7726	14.9779	14.8978	15.3924	15.2669	15.5857	14.6512	15.1017	15.5606	14.9076	15.3095	15.0549	14.6556	15.4615	15.1531	14.8613	15.0543	15.0036	15.3645	15.1067	15.2941	A0A5G2QLY2;A0A5G2RDK0;F1SSL7	ARMH4	A0A5G2QLY2_PIG;A0A5G2RDK0_PIG;F1SSL7_PIG	Armadillo like helical domain containing 4	0.405098	0.85373	0.224073	0.950084	0.92338	0.0546895	0.835081	0.83184	0.078407	0.74643	0.81194	-0.169383	0.909955	0.85274	0.145666	0.988292	0.86169	0.0237175
454	A0A5G2QC50;A0A5G2QTA4;A0A5G2R175;C0JPM4	15.4067	15.2636	14.1297	14.5948	14.5403	14.7649	14.2143	13.6303	14.9609	14.1633	14.7508	15.2556	14.5997	15.1129	14.4514	14.7589	14.3755	15.2792	14.7165	14.4436	14.9328	15.2494	14.8251	15.1677	A0A5G2QC50;A0A5G2QTA4;A0A5G2R175;C0JPM4	TIMP2	A0A5G2QC50_PIG;A0A5G2QTA4_PIG;A0A5G2R175_PIG;C0JPM4_PIG	NTR domain-containing protein;NTR domain-containing protein;NTR domain-containing protein;Tissue inhibitor of metalloproteases-2	0.834101	0.85373	-0.287451	0.999738	0.92338	-0.0203757	0.98007	0.83184	0.105876	0.792188	0.81194	0.267076	0.667322	0.85274	-0.393327	0.989836	0.86169	0.126252
455	A0A5G2R2W7	14.8188	15.1335	15.3495	15.3361	15.1139	15.2192	15.2816	15.0431	15.6218	15.2325	15.0408	15.0162	15.2187	15.2025	15.3923	15.1662	15.2349	15.0613	15.1047	14.9937	14.9637	14.7373	14.9407	14.9747	A0A5G2R2W7	NA	A0A5G2R2W7_PIG	Uncharacterized protein	0.950731	0.85373	0.0441747	0.986894	0.92338	0.0508017	0.0145995	0.08595	-0.209375	0.99743	0.81194	0.006627	0.00245369	0.02662	0.25355	0.00379184	0.03535	-0.260177
456	A0A5G2QN51;I3LC80	15.6408	15.0546	14.8632	14.7938	14.7581	15.0809	15.601	15.7801	15.8237	15.3695	16.0723	15.4712	14.2179	14.9955	14.873	14.3786	14.5885	14.2549	14.6045	14.762	14.9783	14.9767	14.9438	14.9	A0A5G2QN51;I3LC80	SEMA7A	A0A5G2QN51_PIG;I3LC80_PIG	Semaphorin 7A (John Milton Hagen blood group)	7.1704e-08	0	0.654424	0.000382213	0.00987	-0.480493	0.470207	0.83184	-0.171047	0	0	-1.13492	4.13549e-10	0	0.825471	0.0768677	0.34852	0.309446
457	F1S5H0	15.8958	15.132	15.1315	14.8571	14.6497	14.9461	15.3938	15.0857	15.3852	15.1155	14.8086	16.1826	14.6412	15.3445	15.0235	14.0374	14.9039	15.1086	14.8606	14.5676	15.2526	15.6402	15.4327	15.0794	F1S5H0	CYTL1	F1S5H0_PIG	Cytokine like 1	0.722635	0.85373	0.226542	0.773234	0.92338	-0.258836	0.929555	0.83184	0.0368337	0.189735	0.50574	-0.485378	0.977518	0.85274	0.189708	0.389771	0.86169	0.29567
458	A0A286ZHY0;A0A480VGP1;A0A5G2QW73;F1SV99;I3LHV9;I3LNH0	15.7887	15.0719	14.8449	15.4833	14.8422	15.1841	15.1868	14.4264	14.9218	14.4964	15.6503	15.1104	15.1432	15.3574	14.8696	14.6482	15.2909	15.381	14.3805	14.7741	14.9431	15.0999	14.5889	14.8791	A0A286ZHY0;A0A480VGP1;A0A5G2QW73;F1SV99;I3LHV9;I3LNH0	COL16A1	A0A286ZHY0_PIG;A0A480VGP1_PIG;A0A5G2QW73_PIG;F1SV99_PIG;I3LHV9_PIG;I3LNH0_PIG	Collagen type XVI alpha 1 chain;Collagen alpha-1(XVI) chain;Collagen type XVI alpha 1 chain;Collagen type XVI alpha 1 chain;Collagen type XVI alpha 1 chain;Collagen type XVI alpha 1 chain	0.584058	0.85373	-0.237156	0.968163	0.92338	-0.0874423	0.126247	0.42903	-0.424894	0.854768	0.81194	0.149714	0.771787	0.85274	0.187738	0.281727	0.81556	-0.337452
459	A0A5G2QD63	15.2726	15.2002	14.3331	14.912	15.14	14.5819	15.2635	15.5347	15.8567	14.3467	16.027	15.2179	15.3139	15.0201	14.6281	14.5109	15.0146	15.389	14.8756	14.9662	15.0052	14.7406	14.6328	14.9114	A0A5G2QD63	COL9A1	A0A5G2QD63_PIG	Collagen type IX alpha 1 chain	0.0919439	0.37211	0.467782	0.943949	0.92338	0.0728102	0.99895	0.83184	-0.051339	0.297907	0.67153	-0.394972	0.148783	0.43667	0.519121	0.976274	0.86169	-0.124149
460	A0A287A8S8;A0A480WPU1;I3LK59	15.1493	13.8976	13.7348	14.8093	14.5975	14.8886	14.0267	17.1306	15.9362	14.8353	15.4326	13.556	15.6894	14.5357	14.9795	16.0483	14.8864	15.7415	14.2486	14.7539	14.58	14.9273	14.5487	14.6475	A0A287A8S8;A0A480WPU1;I3LK59	ENO1	A0A287A8S8_PIG;A0A480WPU1_PIG;I3LK59_PIG	Enolase 1;Alpha-enolase isoform 1;Enolase 1	0.389857	0.85373	0.640051	0.248355	0.91822	0.800607	0.999975	0.83184	0.104815	0.991854	0.81194	0.160556	0.44312	0.81667	0.535236	0.267755	0.79607	-0.695792
461	A0A287B626	14.5366	15.882	14.3878	14.6377	14.2734	14.7923	15.4587	14.4443	15.1762	14.2591	14.3164	14.9927	15.9227	15.3843	14.7937	15.4292	15.3228	13.9425	14.742	15.3128	15.2217	14.6465	16.0265	15.1033	A0A287B626	NA	A0A287B626_PIG	Uncharacterized protein	0.899386	0.85373	0.022917	0.458456	0.92338	0.380888	0.830639	0.83184	0.423826	0.883847	0.81194	0.357971	0.998537	0.85274	-0.400909	0.943811	0.86169	0.0429379
462	A0A5G2R9A9	14.9879	14.6302	14.1298	14.7875	14.6395	14.7818	15.4641	16.6767	16.0974	15.5064	16.5779	15.0084	15.1	14.4985	14.6004	16.9734	14.5135	15.2599	14.9014	15.4649	15.2812	15.2589	14.9652	14.7762	A0A5G2R9A9	PFN1	A0A5G2R9A9_PIG	Profilin	0.000606151	0.00693	1.22903	0.46661	0.92338	0.498165	0.646152	0.83184	0.448513	0.0813888	0.27219	-0.730869	0.0494711	0.21631	0.780521	0.994161	0.86169	-0.049652
463	I3LTD0	14.8802	17.231	15.048	17.3851	15.0213	15.1236	17.3444	15.3707	17.5379	15.845	15.7082	15.3833	14.7786	17.4072	15.1264	14.8792	16.9836	15.1002	14.7863	14.8483	14.8641	17.3623	14.6246	15.2025	I3LTD0	LYVE1	I3LTD0_PIG	Lymphatic vessel endothelial hyaluronan receptor 1	0.888402	0.85373	0.416747	0.999298	0.92338	-0.0690019	0.829026	0.83184	-0.500151	0.834666	0.81194	-0.485749	0.406136	0.78569	0.916899	0.877717	0.86169	-0.43115
464	A0A287A1V5;A0A287BFY0	16.3132	15.1424	14.7781	15.4447	14.8079	15.5248	15.0868	16.2958	15.7158	15.0997	15.517	15.1392	15.3505	15.0191	15.0531	15.5662	15.1651	15.0374	14.7192	15.0207	15.0505	14.7048	15.0401	14.9256	A0A287A1V5;A0A287BFY0	ALDOA	A0A287A1V5_PIG;A0A287BFY0_PIG	Fructose-bisphosphate aldolase	0.906846	0.85373	0.140532	0.90554	0.92338	-0.13663	0.176814	0.52604	-0.425036	0.533043	0.81194	-0.277162	0.0366732	0.18002	0.565568	0.499127	0.86169	-0.288406
465	F1SHI1	15.1209	14.9949	15.2266	15.0514	15.1219	15.1277	15.2117	15.0784	14.8722	15.2203	15.0851	14.9728	14.4522	14.927	15.2091	14.8675	14.8411	15.3018	14.709	14.8748	15.0948	15.033	14.7731	14.629	F1SHI1	EXT2	F1SHI1_PIG	Exostosin glycosyltransferase 2	0.645214	0.85373	-0.0338261	0.104138	0.58534	-0.174137	0.147849	0.4681	-0.254952	0.731191	0.81194	-0.14031	0.808231	0.85274	0.221126	0.999962	0.86169	-0.0808152
466	F1SU75	15.4454	14.8508	15.1199	15.1961	15.093	14.8191	14.0633	15.7624	14.712	14.4491	14.5995	15.0199	15.0367	14.2536	15.2597	14.4422	14.7295	14.7866	14.6907	14.5884	14.7956	14.3886	14.4326	14.0038	F1SU75	OIT3	F1SU75_PIG	Oncoprotein induced transcript 3	0.397389	0.85373	-0.319689	0.396281	0.92338	-0.336011	0.030985	0.14973	-0.604092	0.999999	0.81194	-0.016322	0.611279	0.85274	0.284402	0.602044	0.86169	-0.26808
467	A0A287B5V2;A0A287BEC0;A0A287BJL0;A0A287BQC8;A0A5G2QR26	14.9049	15.8194	15.1528	14.8205	14.367	15.2017	15.0545	14.4473	15.0925	14.5755	14.2497	15.0878	15.6698	15.4613	15.1631	15.6423	15.1629	14.1363	14.7761	15.2774	15.1785	14.8088	16.1078	15.167	A0A287B5V2;A0A287BEC0;A0A287BJL0;A0A287BQC8;A0A5G2QR26	JCHAIN	A0A287B5V2_PIG;A0A287BEC0_PIG;A0A287BJL0_PIG;A0A287BQC8_PIG;A0A5G2QR26_PIG	Joining chain of multimeric IgA and IgM	0.864726	0.85373	-0.293158	0.927224	0.92338	0.161568	0.999997	0.83184	0.174897	0.518332	0.81194	0.454726	0.900287	0.85274	-0.468055	0.925522	0.86169	0.0133292
468	A0A287AKL0;F1S9C0;F6Q5X1;P0DSO0	17.7558	15.4039	18.4132	13.7787	18.0801	18.1964	18.8328	17.8799	18.6921	19.4331	17.2109	18.5672	13.2395	17.1402	17.1642	14.0872	15.8094	13.9907	18.9005	19.5816	20.5919	18.8128	18.2332	18.1818	A0A287AKL0;F1S9C0;F6Q5X1;P0DSO0	;SAA3;;SAA2	A0A287AKL0_PIG;F1S9C0_PIG;F6Q5X1_PIG;SAA2_PIG	Serum amyloid A protein;Serum amyloid A protein;Serum amyloid A protein;Serum amyloid A-2 protein	0.160244	0.55188	1.498	0.052648	0.39401	-1.69947	0.00485155	0.03558	2.1123	3.22816e-05	0.00033	-3.19747	0.612296	0.85274	-0.614299	1.14516e-08	0	3.81177
469	A0A287BH21	14.3293	11.6169	16.4253	12.1033	16.459	13.2258	12.2378	15.6569	16.1701	16.2539	15.9003	15.5435	16.0782	10.3626	15.8081	16.6838	15.9168	16.3595	17.3521	17.6168	16.6313	13.2411	13.753	14.9652	A0A287BH21	SERPINA3-2	A0A287BH21_PIG	SERPIN domain-containing protein	0.608193	0.85373	1.26713	0.746305	0.92338	1.17492	0.608981	0.83184	1.56665	0.996532	0.81194	-0.0922097	0.999982	0.85274	-0.299521	0.994414	0.86169	0.39173
470	A0A287AD51	12.374	17.2232	15.7086	13.916	16.9574	12.6437	13.7682	15.3575	12.7418	15.7563	15.0838	14.1878	13.8253	13.4332	15.9113	15.2706	15.9758	16.713	15.6062	14.3759	13.7448	15.3104	12.097	14.146	A0A287AD51	COL9A3	A0A287AD51_PIG	Collagen type IX alpha 3 chain	0.419773	0.85373	-0.321233	0.835804	0.92338	0.384358	0.998787	0.83184	-0.590443	0.0933086	0.30456	0.705591	0.432382	0.8122	0.26921	0.912509	0.86169	-0.974801
471	F1SHL0	15.7575	15.455	15.0853	14.8052	15.0375	15.7582	15.2879	14.7798	15.0093	14.925	15.5338	13.1362	15.7474	15.1258	15.355	15.5066	14.5809	14.7574	14.0049	15.0891	15.4972	15.4458	14.311	11.9303	F1SHL0	CLEC14A	F1SHL0_PIG	C-type lectin domain containing 14A	0.611213	0.85373	-0.537762	0.97275	0.92338	-0.137606	0.0962336	0.36569	-0.936748	0.862917	0.81194	0.400157	0.677257	0.85274	0.398986	0.21636	0.70641	-0.799142
472	A0A2C9F3C0;Q4FAT7	15.2773	14.5543	15.4615	14.4105	14.3262	15.2537	15.2706	15.4593	15.367	14.7441	14.8414	14.3696	13.8842	15.1177	14.802	15.242	15.3652	14.5614	14.811	15.0523	15.2038	15.0741	15.0342	14.3908	A0A2C9F3C0;Q4FAT7	GUSB	A0A2C9F3C0_PIG;BGLR_PIG	Beta-glucuronidase	0.949383	0.85373	0.128063	0.99194	0.92338	-0.0518746	0.999926	0.83184	0.0471051	0.845014	0.81194	-0.179937	0.96694	0.85274	0.0809574	0.985837	0.86169	0.0989797
473	A0A287BNE7	14.9019	14.6989	15.508	15.2899	15.4464	14.7744	15.2128	15.0523	14.6307	15.385	14.8278	15.6115	15.6559	14.9151	14.9151	14.8874	14.8401	15.4678	14.7638	14.7207	15.6009	15.6774	14.398	15.3423	A0A287BNE7	RTN4RL2	A0A287BNE7_PIG	Reticulon 4 receptor like 2	0.999827	0.85373	0.0167876	0.999917	0.92338	0.0103258	0.999916	0.83184	-0.0193979	0.999998	0.81194	-0.0064618	0.999066	0.85274	0.0361855	0.999311	0.86169	-0.0297237
474	A0A287BRG6;A0A5G2QQ66;A0A5G2R4G6;I3LRS5	16.4549	14.8763	16.7732	13.8022	12.2951	14.3655	12.9818	14.0227	13.8891	15.3187	14.1891	14.8643	14.8428	12.994	16.8678	16.4833	13.5067	16.6306	15.7812	16.2457	16.6732	14.0396	13.9705	13.6814	A0A287BRG6;A0A5G2QQ66;A0A5G2R4G6;I3LRS5	ALDH1A1	A0A287BRG6_PIG;A0A5G2QQ66_PIG;A0A5G2R4G6_PIG;I3LRS5_PIG	Aldehyde dehydrogenase 1 family member A1	0.881372	0.85373	-0.550271	0.947404	0.92338	0.459655	0.993274	0.83184	0.30409	0.575715	0.81194	1.00993	0.758504	0.85274	-0.854361	0.992918	0.86169	-0.155565
475	A0A287BGV6;A0A480I6I0;A0A5G2QE84;F1S285;K7GT00	15.0663	15.348	15.2718	15.3586	14.9507	15.2126	15.1887	14.7169	15.2027	14.5927	15.5011	14.3578	15.5498	15.3096	15.2976	14.9557	15.5764	15.3848	15.2529	14.89	14.6116	14.7323	14.3895	14.6192	A0A287BGV6;A0A480I6I0;A0A5G2QE84;F1S285;K7GT00	COL14A1	A0A287BGV6_PIG;A0A480I6I0_PIG;A0A5G2QE84_PIG;F1S285_PIG;K7GT00_PIG	Collagen type XIV alpha 1 chain;Collagen alpha-1(XIV) chain;Collagen type XIV alpha 1 chain;Collagen type XIV alpha 1 chain;Collagen alpha-1(XIV) chain isoform X2	0.295607	0.77563	-0.274711	0.82379	0.92338	0.144282	0.0196453	0.10698	-0.452109	0.0455829	0.17712	0.418994	0.62848	0.85274	0.177398	0.00067164	0.00808	-0.596392
476	A0A5G2QCI8;A0A5G2QM19;A0A5G2QW46;F1RNW4	16.4353	15.4321	14.8378	15.281	14.6973	15.3715	15.3264	15.4077	15.2983	14.9226	15.435	15.4849	15.2604	15.2042	14.846	15.2112	14.983	15.2609	15.1334	15.1838	15.4806	14.8134	15.2711	15.1161	A0A5G2QCI8;A0A5G2QM19;A0A5G2QW46;F1RNW4	PEPD	A0A5G2QCI8_PIG;A0A5G2QM19_PIG;A0A5G2QW46_PIG;F1RNW4_PIG	Peptidase D	0.856401	0.85373	-0.0300116	0.527315	0.92338	-0.214879	0.471122	0.83184	-0.176124	0.156728	0.44561	-0.184867	0.175477	0.482	0.146112	0.998509	0.86169	0.0387553
477	A0A5G2R8D7;K9IVR7	14.6913	14.2633	14.6661	15.2249	15.0096	15.3158	15.0817	16.6599	15.7189	15.1354	15.7252	15.479	15.0473	14.6307	15.1341	15.8785	14.9616	15.2566	15.0837	15.4436	14.4275	14.8851	15.3657	14.9967	A0A5G2R8D7;K9IVR7	WDR1	A0A5G2R8D7_PIG;K9IVR7_PIG	WD repeat domain 1	0.00478852	0.03913	0.771509	0.660534	0.92338	0.289613	0.949603	0.83184	0.171892	0.136691	0.40708	-0.481896	0.0367605	0.18002	0.599617	0.933503	0.86169	-0.117721
478	A0A287B8M8;F1RVH7	15.2117	14.8428	14.5225	14.6762	14.5751	14.6912	15.2746	15.21	14.9065	14.7785	15.5395	15.3405	14.483	14.9977	14.4823	14.4951	14.6792	15.0911	14.8234	14.9406	15.1021	14.7167	14.0152	14.7526	A0A287B8M8;F1RVH7	IGFBP7	A0A287B8M8_PIG;F1RVH7_PIG	Uncharacterized protein	0.0130445	0.08479	0.421676	0.999999	0.92338	-0.0485316	0.968581	0.83184	-0.028135	0.0133716	0.06613	-0.470208	0.0621776	0.25618	0.449811	0.963697	0.86169	0.0203967
479	A0A5G2RGB6;F1SAL4	12.3273	15.1951	15.6845	14.0953	15.6564	13.753	15.0047	14.1597	15.0351	15.1185	14.9171	14.5145	15.5178	15.3002	16.0966	15.7795	14.9919	15.8348	14.6279	16.552	14.2516	14.359	14.52	14.628	A0A5G2RGB6;F1SAL4	MEP1B	A0A5G2RGB6_PIG;F1SAL4_PIG	Meprin A subunit	0.998227	0.85373	0.339686	0.0174624	0.19117	1.13488	0.597059	0.83184	0.371161	0.0384493	0.15308	0.795196	0.751475	0.85274	-0.0314751	0.389338	0.86169	-0.763721
480	A0A286ZSA0;A0A287A1U0;F1S5Z7	15.1624	15.1053	14.9583	14.4347	15.043	15.0292	14.9081	14.8841	15.15	15.0049	15.2855	14.944	14.7977	14.7817	15.0636	14.6545	14.9006	14.9017	14.4618	14.9366	14.8494	14.9843	14.5259	14.5829	A0A286ZSA0;A0A287A1U0;F1S5Z7	SORT1	A0A286ZSA0_PIG;A0A287A1U0_PIG;F1S5Z7_PIG	Sortilin	0.899855	0.85373	0.0739253	0.727625	0.92338	-0.105532	0.118614	0.41664	-0.232005	0.31088	0.67883	-0.179457	0.0201264	0.12499	0.305931	0.606548	0.86169	-0.126473
481	A0A286ZYQ4	14.48	15.3734	14.6827	15.1144	14.889	15.4457	15.9984	17.3186	16.6346	15.8857	16.3836	15.7809	15.0423	14.4144	15.3446	15.1757	15.1681	14.9843	15.376	16.0391	15.5155	15.7115	15.9311	15.5908	A0A286ZYQ4	LCP1	A0A286ZYQ4_PIG	Lymphocyte cytosolic protein 1	1.88178e-10	0	1.33606	0.99993	0.92338	0.0240094	0.0162898	0.09392	0.696426	2.80828e-10	0	-1.31205	0.00392471	0.03866	0.639638	0.0112663	0.08411	0.672416
482	A0A287B761;F1RIZ9	15.0307	14.7259	15.1743	14.751	15.3335	15.0202	14.8152	14.6998	14.8889	15.0778	14.7646	14.9453	14.5273	14.9167	14.8816	14.8753	17.3554	15.0824	15.1107	14.9771	14.8273	15.2571	14.7798	14.4645	A0A287B761;F1RIZ9	GALNT7	A0A287B761_PIG;F1RIZ9_PIG	Polypeptide N-acetylgalactosaminyltransferase	0.96277	0.85373	-0.140669	0.822035	0.92338	0.267155	0.973277	0.83184	-0.103207	0.53324	0.81194	0.407824	0.99998	0.85274	-0.0374616	0.558268	0.86169	-0.370362
483	A0A287BKI9	15.2995	14.7748	15.0621	15.0613	14.6308	15.1003	15.5013	15.1089	15.3876	15.4786	15.3319	15.4149	14.6916	15.1322	14.97	14.6116	14.6312	15.0286	14.6529	14.8227	15.3321	15.0557	14.9733	14.6891	A0A287BKI9	B3GNT7	A0A287BKI9_PIG	Hexosyltransferase	1.83981e-05	0.00036	0.382389	0.255238	0.92338	-0.143944	0.841707	0.83184	-0.0671968	5.64605e-10	0	-0.526333	6.06009e-06	0.00016	0.449586	0.785703	0.86169	0.0767468
484	A0A286ZVG0;A0A287A0D2	15.4425	14.774	14.779	14.3882	14.5216	14.6863	15.1956	15.4388	15.1864	15.0238	15.6154	15.2908	14.8837	15.0351	14.6684	14.6842	15.0815	14.9474	14.7348	15.0024	15.2634	14.9499	15.0457	15.0473	A0A286ZVG0;A0A287A0D2	PSAP	A0A286ZVG0_PIG;A0A287A0D2_PIG	Saposin-B-Val;Prosaposin	1.19104e-06	3e-05	0.52652	0.674624	0.92338	0.118113	0.114856	0.40539	0.241969	0.000266637	0.00215	-0.408407	0.0466628	0.21218	0.28455	0.636414	0.86169	0.123857
485	A0A5G2R9R4;F1SUA0	15.502	14.9021	14.616	15.119	14.6837	15.0056	15.0004	14.7969	15.2369	14.308	15.4924	14.9766	14.6239	14.9924	14.8994	14.3883	14.8482	15.0515	14.7834	14.7139	14.7262	14.5859	14.6624	14.5461	A0A5G2R9R4;F1SUA0	FBLN7	A0A5G2R9R4_PIG;F1SUA0_PIG	Fibulin 7	0.999997	0.85373	-0.00288737	0.747422	0.92338	-0.170804	0.322096	0.77082	-0.301772	0.758437	0.81194	-0.167917	0.332034	0.70472	0.298885	0.881119	0.86169	-0.130968
486	A0A5G2QK06;A0A5G2RD35;K9IWA3	14.9341	15.6255	15.5741	15.7396	15.2035	15.4174	15.4032	15.5809	15.5162	15.6654	15.3174	14.5319	15.4715	15.1015	16.4271	17.0519	15.992	15.5079	15.2587	14.7034	14.5918	15.4394	15.1154	14.965	A0A5G2QK06;A0A5G2RD35;K9IWA3	ATP6AP1	A0A5G2QK06_PIG;A0A5G2RD35_PIG;K9IWA3_PIG	ATPase H+ transporting accessory protein 1	0.98477	0.85373	-0.0798985	0.20264	0.83208	0.50962	0.102825	0.38376	-0.403443	0.0952198	0.30833	0.589519	0.212827	0.54445	0.323545	9.5766e-05	0.0018	-0.913063
487	A0A5G2QI33;K7GQJ1	15.2859	15.0476	14.9577	14.8753	14.7588	14.71	15.4446	14.9589	15.0554	14.6915	15.1156	15.5068	15.0488	15.3805	14.206	14.3412	15.1303	15.0597	14.7023	15.0331	14.9159	14.8924	14.9295	14.8755	A0A5G2QI33;K7GQJ1	FGFR1	A0A5G2QI33_PIG;K7GQJ1_PIG	Fibroblast growth factor receptor	0.448695	0.85373	0.189576	0.99472	0.92338	-0.0781294	0.999338	0.83184	-0.0477637	0.31605	0.6859	-0.267705	0.576619	0.85274	0.237339	0.982775	0.86169	0.0303657
488	F1RW71	14.9279	15.1267	15.0282	14.2065	14.9965	14.4698	15.7046	15.1814	15.4166	15.4985	15.4853	15.54	14.4198	15.3058	15.1771	14.4648	13.6584	14.9009	14.6599	14.7129	15.2096	15.2681	14.6836	14.5457	F1RW71	MMRN1	F1RW71_PIG	Multimerin 1	0.0020791	0.01918	0.678458	0.931768	0.92338	-0.138129	0.669324	0.83184	0.0540479	0.000223026	0.00184	-0.816587	0.12584	0.39266	0.62441	0.302556	0.84794	0.192177
489	A0A286ZS39;A0A286ZW89;A0A287AN50;A0A287B6G6;A0A287BRA3;I3LGD9	15.3847	14.4179	14.0606	14.2687	14.4054	14.2022	15.0589	15.1177	15.0619	14.2638	15.5201	15.0133	14.414	14.7888	14.6289	14.256	14.8177	14.7255	14.3677	14.4784	14.8439	14.9642	14.3986	14.5413	A0A286ZS39;A0A286ZW89;A0A287AN50;A0A287B6G6;A0A287BRA3;I3LGD9	AGRN	A0A286ZS39_PIG;A0A286ZW89_PIG;A0A287AN50_PIG;A0A287B6G6_PIG;A0A287BRA3_PIG;I3LGD9_PIG	Agrin	0.0109528	0.07564	0.549378	0.736727	0.92338	0.148568	0.655322	0.83184	0.142445	0.174296	0.47805	-0.40081	0.257636	0.60492	0.406933	0.998531	0.86169	-0.00612275
490	Q8MI69	15.4769	14.7407	14.4637	14.6167	14.7228	13.7959	15.3633	15.1696	14.0619	14.7182	15.1726	15.1726	13.8198	14.6346	14.7991	14.6589	14.5306	14.9643	14.5439	14.6014	14.9559	15.5811	14.2911	14.1755	Q8MI69	WFDC2	WFDC2_PIG	WAP four-disulfide core domain protein 2	0.582369	0.85373	0.306911	1	0.92338	-0.0682593	0.752259	0.83184	0.0553669	0.583658	0.81194	-0.375171	0.995691	0.85274	0.251545	0.735412	0.86169	0.123626
491	A0A287AR56	13.9914	15.6981	15.6075	14.477	15.8611	12.9692	15.3841	16.2581	13.3421	16.2009	15.266	14.5182	13.9066	14.1421	16.6358	15.5999	12.7067	16.3026	16.2568	16.4058	13.6267	15.8159	14.5738	12.2465	A0A287AR56	QSOX2	A0A287AR56_PIG	Sulfhydryl oxidase	0.989477	0.85373	0.394177	0.970663	0.92338	0.114892	0.539827	0.83184	0.0535286	0.882183	0.81194	-0.279285	0.433514	0.8122	0.340648	0.788038	0.86169	-0.0613634
492	A0A287AGR4;A0A287B6Z7	15.2954	15.0502	14.4764	14.4769	14.2464	14.4194	15.3945	14.6713	14.9943	14.7017	15.3677	15.5201	14.7943	15.2535	14.9154	15.0103	13.9954	14.6588	15.226	14.1911	15.2814	14.6873	13.9085	14.3513	A0A287AGR4;A0A287B6Z7	ADGRL4	A0A287AGR4_PIG;A0A287B6Z7_PIG	Adhesion G protein-coupled receptor L4	0.0542108	0.25279	0.447466	0.852674	0.92338	0.110485	0.999461	0.83184	-0.0531854	0.303662	0.67883	-0.336981	0.120344	0.38582	0.500652	0.909653	0.86169	-0.163671
493	F1S3G7	15.2126	14.2581	12.9875	15.3532	13.3029	15.3924	15.4994	14.7322	15.7324	13.0131	15.6724	14.9589	14.708	15.0471	14.0658	11.8282	14.3136	13.2865	14.0668	13.3985	17.4326	12.978	14.5289	14.5478	F1S3G7	COL5A3	F1S3G7_PIG	Collagen type V alpha 3 chain	0.37962	0.85373	0.516926	0.7159	0.92338	-0.542914	0.993219	0.83184	0.0743094	0.0460508	0.17725	-1.05984	0.332213	0.70472	0.442617	0.876624	0.86169	0.617224
494	A0A287AKJ2	15.1329	15.1406	14.623	14.1214	14.5842	15.2231	14.8158	14.9816	14.9692	14.7358	15.4237	14.7377	14.3649	14.7017	15.0644	14.3195	15.1601	14.7358	14.2888	14.6839	14.1997	14.614	14.1371	14.4471	A0A287AKJ2	NID2	A0A287AKJ2_PIG	Nidogen 2	0.848318	0.85373	0.139762	0.968711	0.92338	-0.0797913	0.0989715	0.37439	-0.409103	0.587592	0.81194	-0.219553	0.0107805	0.07896	0.548866	0.2302	0.73292	-0.329312
495	P21753	15.1583	14.925	13.8161	14.6569	14.3618	15.3948	15.2631	16.1254	15.4461	14.5086	16.0453	14.8482	14.6679	14.2886	14.577	15.2825	14.393	15.2765	14.6785	15.1532	14.8726	14.8738	14.8957	14.9305	P21753	TMSB10	TYB10_PIG	Thymosin beta-10	0.0523858	0.2496	0.653956	0.998957	0.92338	0.0287573	0.876938	0.83184	0.181884	0.0797475	0.26779	-0.625199	0.312224	0.67489	0.472072	0.924394	0.86169	0.153127
496	F1SCE4;P46202	14.3326	17.1875	14.9388	16.1304	15.0689	15.0792	17.2491	10.1415	16.8355	15.1902	11.8067	14.6001	14.8314	15.036	15.0859	15.765	17.0791	14.9253	15.2025	15.0423	14.3226	14.9687	15.0186	15.0066	F1SCE4;P46202	UABP-2;	F1SCE4_PIG;UFAP2_PIG	SERPIN domain-containing protein;Uteroferrin-associated basic protein 2	0.560341	0.85373	-1.15237	0.999984	0.92338	-0.00243723	0.802966	0.83184	-0.52935	0.589098	0.81194	1.14993	0.985131	0.85274	-0.623018	0.81123	0.86169	-0.526913
497	A0A287B0P6;P28491	15.3926	14.846	14.1568	14.7103	14.9108	14.8021	15.466	15.4157	15.2363	14.9577	15.6883	14.3879	14.0477	14.5	14.7523	15.3072	14.4344	15.107	14.6962	14.8399	14.8125	15.2444	13.8332	14.5975	A0A287B0P6;P28491	CALR	A0A287B0P6_PIG;CALR_PIG	Calreticulin	0.342462	0.84385	0.388886	0.981232	0.92338	-0.111681	0.983146	0.83184	-0.132495	0.176163	0.47805	-0.500567	0.195296	0.52303	0.521381	1	0.86169	-0.0208139
498	A0A5G2QWP0	14.5835	14.8849	14.9262	15.4708	14.9158	15.4332	14.9731	14.9159	15.1336	15.8957	14.6645	16.1594	15.2173	14.5941	15.169	14.3949	15.3646	14.854	14.6634	14.819	14.0059	14.8584	15.1093	14.5622	A0A5G2QWP0	PLXND1	A0A5G2QWP0_PIG	Plexin D1	0.577419	0.85373	0.254635	0.93667	0.92338	-0.103409	0.124632	0.42903	-0.366041	0.256093	0.61893	-0.358045	0.00685796	0.06059	0.620677	0.340805	0.86169	-0.262632
499	A0A286ZIH1;A0A287AXK8;A0A287BHV6;A0A5G2QEL4	15.3802	14.8922	14.7041	14.9466	14.8217	14.88	14.8376	14.6368	15.0414	14.6696	14.6899	15.2	14.883	15.0769	14.7726	14.357	14.9843	14.8797	14.5276	14.7476	14.5307	15.1146	14.9342	14.8451	A0A286ZIH1;A0A287AXK8;A0A287BHV6;A0A5G2QEL4	PTPRF	A0A286ZIH1_PIG;A0A287AXK8_PIG;A0A287BHV6_PIG;A0A5G2QEL4_PIG	Protein tyrosine phosphatase receptor type F	0.950743	0.85373	-0.0915548	0.850483	0.92338	-0.111874	0.613242	0.83184	-0.154148	0.993358	0.81194	-0.0203196	0.906006	0.85274	0.0625932	0.969541	0.86169	-0.0422736
500	A0A5G2QDK7;F1S9T5;Q9GL76	15.0349	15.0868	14.8997	15.0125	14.7102	15.078	14.9539	14.8753	15.2305	14.9283	14.9254	15.0189	14.3719	15.0167	14.9792	14.4898	15.1047	14.7847	14.8411	14.636	14.3476	14.761	14.7516	14.5962	A0A5G2QDK7;F1S9T5;Q9GL76	NECTIN1	A0A5G2QDK7_PIG;F1S9T5_PIG;NECT1_PIG	Nectin-1	0.998049	0.85373	0.0183799	0.354522	0.92338	-0.179169	0.025969	0.12923	-0.314762	0.264802	0.62642	-0.197549	0.0155565	0.10177	0.333142	0.609112	0.86169	-0.135593
501	F1SLL1;K7GRW1	14.9034	14.8346	14.8291	14.8695	14.9121	14.8119	15.2122	15.1075	15.2879	15.3592	15.2199	15.4086	14.4833	15.0616	14.7512	15.1728	14.975	15.3568	14.9356	15.1182	15.2071	15.3409	15.2048	14.9697	F1SLL1;K7GRW1	IL6ST	F1SLL1_PIG;K7GRW1_PIG	Interleukin 6 signal transducer	0.000120234	0.00169	0.405811	0.622008	0.92338	0.106705	0.0178121	0.09994	0.269294	0.0136999	0.06734	-0.299105	0.629338	0.85274	0.136516	0.278651	0.81524	0.162589
502	A0A286ZNF6;A0A286ZU71;A0A287BBB2;A0A287BLQ6;A0A5G2QQM0;F1SN61;I3LRN7	15.3717	13.9594	14.7103	13.0417	15.0693	16.6527	14.5508	15.1375	16.3247	12.3666	16.5426	11.9943	12.8566	15.4342	17.1927	14.1755	15.0178	15.1293	14.4665	13.1535	17.0091	16.2254	14.4872	14.6342	A0A286ZNF6;A0A286ZU71;A0A287BBB2;A0A287BLQ6;A0A5G2QQM0;F1SN61;I3LRN7	SEMA6D	A0A286ZNF6_PIG;A0A286ZU71_PIG;A0A287BBB2_PIG;A0A287BLQ6_PIG;A0A5G2QQM0_PIG;F1SN61_PIG;I3LRN7_PIG	Semaphorin 6D	0.953647	0.85373	-0.314752	0.999549	0.92338	0.166809	0.990852	0.83184	0.19513	0.924142	0.81194	0.48156	0.867939	0.85274	-0.509882	0.997273	0.86169	0.0283214
503	A0A5G2QCF0	15.2661	15.0392	14.7692	14.7253	14.6821	14.6731	15.4694	15.092	15.0445	14.8663	14.9503	14.9247	14.5253	14.8649	14.7806	14.3331	14.68	15.0717	14.4621	14.5143	15.0752	15.3135	14.6884	14.8039	A0A5G2QCF0	NA	A0A5G2QCF0_PIG	Uncharacterized protein	0.440363	0.85373	0.198666	0.786969	0.92338	-0.149909	0.999609	0.83184	-0.049614	0.0750935	0.25639	-0.348575	0.546417	0.85274	0.24828	0.730306	0.86169	0.100295
504	A0A5G2QK84;A0A5G2QKI7;A0A5G2QLL7;A0A5G2R957;F1SR53	14.582	14.9394	14.5473	15.0092	15.1352	15.2057	14.417	15.1088	15.2492	14.82	15.247	14.7568	14.8157	14.5061	15.2856	14.4732	15.1053	14.9554	14.6154	15.0547	14.316	14.7995	14.7804	14.2412	A0A5G2QK84;A0A5G2QKI7;A0A5G2QLL7;A0A5G2R957;F1SR53	ITGA5	A0A5G2QK84_PIG;A0A5G2QKI7_PIG;A0A5G2QLL7_PIG;A0A5G2R957_PIG;F1SR53_PIG	Integrin subunit alpha 5;Integrin subunit alpha 5;Integrin subunit alpha 5;Integrin subunit alpha 5;Integrin alpha-5	0.997582	0.85373	0.0299773	0.967547	0.92338	-0.0462675	0.195466	0.56845	-0.26861	0.915993	0.81194	-0.0762448	0.133514	0.40719	0.298587	0.39832	0.86169	-0.222342
505	F1RGY5	14.3637	14.8744	14.8192	14.4199	14.6536	14.3666	14.849	15.4675	14.946	14.953	15.5375	13.7547	14.8298	14.6199	15.0873	14.6427	15.3064	15.493	15.1518	14.92	14.4958	14.7853	14.4891	14.2726	F1RGY5	NID1	F1RGY5_PIG	Nidogen 1	0.715574	0.85373	0.335039	0.15402	0.72716	0.413611	0.727368	0.83184	0.102876	0.757312	0.81194	0.0785715	1	0.85274	0.232163	0.758915	0.86169	-0.310735
506	A0A287B116;A0A5G2R1Q9	16.4808	14.5687	14.3779	15.4582	15.0378	15.429	14.6096	15.4414	15.4545	14.5965	16.1305	16.739	14.7317	14.8958	14.8885	14.9891	15.3997	14.7691	14.247	14.3542	16.164	14.7687	14.8265	14.267	A0A287B116;A0A5G2R1Q9	TNFRSF21	A0A287B116_PIG;A0A5G2R1Q9_PIG	TNF receptor superfamily member 21	0.372268	0.85373	0.269877	0.758609	0.92338	-0.27976	0.225509	0.62745	-0.45414	0.0535898	0.19839	-0.549636	0.00782886	0.06451	0.724016	0.755401	0.86169	-0.17438
507	A0A287A2R9;A0A5G2QSR7	15.7421	15.2017	14.3982	14.8624	15.0076	15.1825	14.704	16.7632	15.6407	14.9232	15.6808	14.5431	15.1541	14.9756	14.8815	15.5971	14.9249	15.1017	14.5519	14.9856	14.9786	14.7861	14.6668	14.8548	A0A287A2R9;A0A5G2QSR7	CRK	A0A287A2R9_PIG;A0A5G2QSR7_PIG	CRK proto-oncogene, adaptor protein;CRK proto-oncogene, adaptor protein	0.633852	0.85373	0.310062	0.997821	0.92338	0.0400573	0.797977	0.83184	-0.261798	0.751496	0.81194	-0.270005	0.164623	0.46408	0.571861	0.678719	0.86169	-0.301855
508	A0A287A0M2	14.6082	15.1997	15.0017	13.2949	14.5227	14.199	14.6567	14.1453	14.591	14.8423	15.0553	13.7434	14.4092	15.139	15.0156	15.2407	14.5881	15.465	14.9282	14.9809	14.5714	14.6114	14.7596	13.8738	A0A287A0M2	ARSG	A0A287A0M2_PIG	Arylsulfatase G	1	0.85373	0.0346412	0.162569	0.73592	0.505243	0.784895	0.83184	0.149848	0.168767	0.46841	0.470602	0.797123	0.85274	-0.115207	0.695027	0.86169	-0.355395
509	A0A287ATG1	14.832	14.2287	13.5923	14.1541	13.7687	13.7214	14.2333	14.3501	14.685	14.4067	14.8616	14.8204	14.9925	15.1412	14.6327	14.3071	15.242	15.6888	14.6065	14.3418	14.485	14.9739	14.5865	14.6016	A0A287ATG1	UCMA	A0A287ATG1_PIG	Upper zone of growth plate and cartilage matrix associated	0.0305603	0.16491	0.510004	8.34496e-07	6e-05	0.95121	0.00577745	0.0408	0.549693	0.0504674	0.19065	0.441207	0.924211	0.85274	-0.0396892	0.215858	0.70641	-0.401517
510	A0A5G2QDE0;A0A5G2RFS2;I3LQA4	14.0882	14.6031	14.9984	14.9416	15.1031	14.9704	15.4218	14.8801	15.0875	15.1355	15.0363	14.4201	14.147	14.3031	15.0279	14.6502	14.7002	14.9551	14.6963	15.0495	14.8351	14.9284	15.053	14.685	A0A5G2QDE0;A0A5G2RFS2;I3LQA4	PROCR	A0A5G2QDE0_PIG;A0A5G2RFS2_PIG;I3LQA4_PIG	Protein C receptor	0.961331	0.85373	0.21276	0.411411	0.92338	-0.153546	0.624751	0.83184	0.0904335	0.200935	0.52217	-0.366306	0.911818	0.85274	0.122327	0.0331402	0.18395	0.24398
511	A0A287A0E9	14.3373	14.7887	15.8601	16.2208	15.3502	15.0451	14.5347	15.2815	15.1737	16.0135	14.4974	14.975	14.755	15.1122	15.4763	14.7443	15.0061	14.0244	14.2751	14.2954	14.5464	14.972	14.6431	14.6275	A0A287A0E9	CLCA1	A0A287A0E9_PIG	Calcium-activated chloride channel regulator 1	0.863251	0.85373	-0.187736	0.167412	0.75052	-0.413973	0.0022337	0.01945	-0.707105	0.573971	0.81194	-0.226237	0.0279773	0.15469	0.519369	0.40249	0.86169	-0.293132
512	A0A287A1I6	14.9124	14.8228	14.9323	15.259	14.4314	15.5052	14.8669	14.9812	15.3074	14.8048	14.9408	15.2232	14.5571	15.0947	14.9072	14.35	15.2657	14.4466	14.4927	14.5949	14.6259	14.3882	14.9984	14.9041	A0A287A1I6	PCDH18	A0A287A1I6_PIG	Protocadherin 18	0.939868	0.85373	0.0435331	0.381853	0.92338	-0.206969	0.037761	0.17735	-0.309809	0.141534	0.41694	-0.250502	0.0106218	0.07896	0.353342	0.651482	0.86169	-0.10284
513	A0A5G2QM06	15.112	14.9429	15.165	15.3886	14.951	15.0642	14.9512	14.6864	14.7855	14.8241	14.6794	14.7471	14.7732	14.8588	14.7183	14.752	15.1313	14.7884	14.6188	14.8839	14.4852	14.7599	14.6567	14.6292	A0A5G2QM06	FBN2	A0A5G2QM06_PIG	Fibrillin 2	3.05054e-05	0.00055	-0.324987	0.000682285	0.01376	-0.26695	2.67527e-09	0	-0.431635	0.915453	0.81194	0.0580369	0.306758	0.66911	0.106647	0.072846	0.33735	-0.164684
514	F1SQR8	15.9967	15.212	14.99	15.1067	15.5997	14.9858	15.459	16.2056	15.3808	15.1693	15.4347	14.9607	14.851	14.1817	15.5063	15.0859	15.313	14.7484	14.9336	14.8112	14.7736	14.9668	14.3355	14.65	F1SQR8	LTA4H	F1SQR8_PIG	Leukotriene A(4) hydrolase	0.937141	0.85373	0.11988	0.318213	0.92338	-0.367423	0.0508139	0.22558	-0.570032	0.100599	0.3179	-0.487303	0.00927412	0.07428	0.689912	0.796985	0.86169	-0.202609
515	F1RVE6;K7GN82;K7GQ07;K7GS36	14.8631	15.0887	14.5464	14.7191	14.5153	14.8908	14.6152	14.2754	15.3463	14.5694	14.4499	14.6415	14.7696	14.6716	14.6826	14.8794	14.9645	14.6114	14.9158	15.1755	14.6385	15.3579	14.8115	14.9925	F1RVE6;K7GN82;K7GQ07;K7GS36	NRP1	F1RVE6_PIG;K7GN82_PIG;K7GQ07_PIG;K7GS36_PIG	Neuropilin	0.974668	0.85373	-0.120941	0.998701	0.92338	-0.00741273	0.8621	0.83184	0.211389	0.993108	0.81194	0.113528	0.687276	0.85274	-0.33233	0.779014	0.86169	0.218801
516	A0A5G2QAW9;F1S3H9	14.6102	15.2641	14.7272	14.4529	14.5786	14.521	15.3044	14.2435	14.6378	14.2356	14.5896	14.7352	14.5397	14.8335	14.2319	14.7409	14.5169	14.5587	15.1897	15.2657	15.0715	14.4354	15.0007	14.672	A0A5G2QAW9;F1S3H9	LOC100517145	A0A5G2QAW9_PIG;F1S3H9_PIG	Uncharacterized protein;Complement C3	0.968971	0.85373	-0.0679787	0.951167	0.92338	-0.122026	0.142507	0.45646	0.246841	0.999798	0.81194	-0.0540475	0.0494066	0.21631	-0.31482	0.0333496	0.18395	0.368868
517	K7GR72	13.1123	14.7689	14.1291	14.5377	13.7747	15.1346	14.2423	15.2636	15.5194	14.7405	14.7965	14.2746	16.533	14.2487	14.4171	17.7348	15.1928	14.2124	14.7859	14.7654	13.3292	15.5517	15.7463	15.434	K7GR72	SLC4A1	K7GR72_PIG	Anion exchange protein	0.290157	0.76838	0.563257	0.0112906	0.14	1.14691	0.916999	0.83184	0.692512	0.624525	0.81194	0.583656	0.753552	0.85274	-0.129255	0.0946924	0.39236	-0.454402
518	A0A286ZVT6;A0A287AHD5;A0A5G2RF91;F1RIP6	15.0863	14.5146	14.3217	13.939	14.4595	13.2486	15.0351	15.7869	15.2086	13.9262	16.5771	14.2573	15.4632	14.3156	14.1526	13.8389	14.5201	15.6494	14.6767	14.4985	15.4863	13.9055	13.8666	13.3329	A0A286ZVT6;A0A287AHD5;A0A5G2RF91;F1RIP6	NUCB1	A0A286ZVT6_PIG;A0A287AHD5_PIG;A0A5G2RF91_PIG;F1RIP6_PIG	Nucleobindin 1	0.128322	0.4829	0.87025	0.663312	0.92338	0.395004	0.979547	0.83184	0.0327988	0.736577	0.81194	-0.475246	0.312038	0.67489	0.837451	0.88058	0.86169	-0.362205
519	A0A287AZ91;A0A5G2RH88;P80031	14.4719	15.8321	15.0234	16.5664	14.1504	14.0637	14.0971	15.7557	16.2245	16.999	15.4228	14.2994	14.2337	14.9792	14.8836	15.6379	15.4947	15.3916	14.2032	14.8363	13.1251	16.5571	13.3218	15.0036	A0A287AZ91;A0A5G2RH88;P80031	LOC100739163;LOC100739163;GSTP1	A0A287AZ91_PIG;A0A5G2RH88_PIG;GSTP1_PIG	Uncharacterized protein;Uncharacterized protein;Glutathione S-transferase P	0.817036	0.85373	0.448418	0.999997	0.92338	0.0854689	0.542695	0.83184	-0.510133	0.809713	0.81194	-0.362949	0.12849	0.39528	0.958551	0.536186	0.86169	-0.595602
520	A0A287A556;A0A287BLH9	14.0501	16.1493	14.7967	14.0878	14.8053	14.8141	15.8606	14.5923	14.5253	15.008	14.8342	14.8022	15.338	15.2486	14.8746	14.3184	14.3309	14.0841	14.6332	14.1037	14.1258	13.9887	15.3673	13.9632	A0A287A556;A0A287BLH9	LOC100623670;	A0A287A556_PIG;A0A287BLH9_PIG	Ig-like domain-containing protein;Uncharacterized protein	0.958021	0.85373	0.153223	0.999024	0.92338	-0.0847819	0.705815	0.83184	-0.420237	0.918905	0.81194	-0.238005	0.400305	0.78196	0.573461	0.772873	0.86169	-0.335456
521	O62839	15.7339	15.3254	14.2155	14.7698	14.4535	14.9398	14.9773	15.6483	15.6258	15.2344	14.8611	14.7859	16.9098	15.2795	15.047	16.6239	15.4068	15.7088	15.236	15.4163	14.885	14.1408	14.0239	15.0615	O62839	CAT	CATA_PIG	Catalase	0.734273	0.85373	0.282502	0.0113146	0.14	0.922993	0.981946	0.83184	-0.112391	0.175544	0.47805	0.64049	0.534431	0.85274	0.394894	0.00327387	0.03116	-1.03538
522	A0A5G2QZN6;Q5XLD3	15.5546	15.8129	15.3356	13.5442	14.2687	14.5833	14.1457	16.8134	15.0385	15.2017	15.3098	14.8764	15.4434	15.8621	14.8884	15.4534	15.1036	14.7066	14.8079	14.5355	15.4735	15.7177	14.8867	14.3891	A0A5G2QZN6;Q5XLD3	CKM	A0A5G2QZN6_PIG;KCRM_PIG	Creatine kinase M-type	0.72505	0.85373	0.381044	0.648153	0.92338	0.393031	0.956545	0.83184	0.118523	0.999156	0.81194	0.0119867	0.959413	0.85274	0.262521	0.917835	0.86169	-0.274508
523	F1S268	14.4955	13.9305	14.4198	14.172	14.0006	14.2216	13.6944	13.9211	13.9948	13.9094	13.7016	14.3319	14.7558	15.1893	14.866	15.3038	15.2979	14.86	14.4616	14.3512	14.6726	14.6371	14.6524	14.2771	F1S268	CREG1	F1S268_PIG	Cellular repressor of E1A stimulated genes 1	0.149994	0.53401	-0.28113	2.59792e-14	0	0.838798	0.103424	0.38428	0.302002	0	0	1.11993	0.000269365	0.00444	-0.583133	9.562e-07	3e-05	-0.536796
524	Q9TSX9	14.5296	14.7567	14.3396	14.5516	14.8439	15.1689	14.3728	15.7549	14.7723	14.8952	14.662	14.7663	15.1255	14.3318	15.3964	16.0724	15.5723	15.1733	15.0506	15.1209	14.3708	14.6476	19.207	14.2787	Q9TSX9	PRDX6	PRDX6_PIG	Peroxiredoxin-6	0.988385	0.85373	0.17218	0.7429	0.92338	0.580226	0.610471	0.83184	0.747554	0.900587	0.81194	0.408046	0.797996	0.85274	-0.575374	0.994937	0.86169	0.167328
525	F1SIW5	14.8486	14.6232	14.7137	15.1059	14.5055	15.1171	14.4545	14.4947	14.8533	15.0099	14.6764	15.1433	14.9824	14.8517	14.6821	14.3932	14.5723	14.4375	14.1483	14.6275	14.4707	15.052	14.5024	14.6058	F1SIW5	B3GNT2	F1SIW5_PIG	Hexosyltransferase	0.999506	0.85373	-0.0469657	0.350522	0.92338	-0.16581	0.0256693	0.12923	-0.251236	0.429804	0.81194	-0.118844	0.0470299	0.21218	0.20427	0.597501	0.86169	-0.0854263
526	A0A5G2RCQ0;I3LB80	14.8942	15.1388	14.9501	15.0807	15.0143	15.2354	15.1642	15.0399	15.3944	15.3394	15.1555	14.5041	14.9194	14.6776	14.8598	14.8326	14.8207	14.2612	14.7203	14.6742	14.8048	14.6357	14.7775	14.6251	A0A5G2RCQ0;I3LB80	SLC3A2	A0A5G2RCQ0_PIG;I3LB80_PIG	Solute carrier family 3 member 2	0.957611	0.85373	0.0473359	0.0006299	0.01302	-0.323687	5.9982e-05	0.00093	-0.345978	6.80259e-05	0.00065	-0.371023	4.18751e-06	0.00012	0.393313	0.916033	0.86169	-0.0222902
527	A0A287AH19;A0A480LRC7;F1SDM3	14.5978	15.1654	15.2322	14.523	14.5115	14.3701	15.241	14.8172	14.8609	14.8188	14.4348	13.9045	14.1849	12.6082	15.918	15.9764	15.2849	14.4396	15.1776	14.0768	12.8582	14.3232	13.719	14.5107	A0A287AH19;A0A480LRC7;F1SDM3	ADAM12	A0A287AH19_PIG;A0A480LRC7_PIG;F1SDM3_PIG	ADAM metallopeptidase domain 12	0.887683	0.85373	-0.0538188	0.999987	0.92338	0.00199439	0.383937	0.83184	-0.622416	0.902597	0.81194	0.0558132	0.848786	0.85274	0.568597	0.38458	0.86169	-0.62441
528	A0A287ATF2	15.3076	15.0489	14.9211	13.4808	13.6352	14.2533	14.9499	15.5727	14.4801	15.1005	14.8538	15.0546	14.2492	15.2358	14.6153	15.4458	13.5902	14.4546	15.3223	15.355	14.2533	14.8796	14.7806	14.4797	A0A287ATF2	DSG2	A0A287ATF2_PIG	Desmoglein 2	0.204108	0.62592	0.560794	0.858136	0.92338	0.157352	0.250234	0.6696	0.403947	0.658179	0.81194	-0.403441	0.99996	0.85274	0.156847	0.688879	0.86169	0.246594
529	A0A5G2QEG8;F1RUM0	14.4746	13.1278	14.6757	14.987	14.6018	13.7381	14.6844	14.883	13.465	14.7194	14.8381	14.8778	14.9681	13.8778	14.7544	13.8993	15.3753	14.9216	14.768	14.6855	14.5967	14.4131	14.5215	14.2034	A0A5G2QEG8;F1RUM0	ITIH5	A0A5G2QEG8_PIG;F1RUM0_PIG	Inter-alpha-trypsin inhibitor heavy chain 5	0.736989	0.85373	0.310448	0.595887	0.92338	0.36526	0.792777	0.83184	0.263887	0.995704	0.81194	0.0548118	0.999892	0.85274	0.046561	0.990688	0.86169	-0.101373
530	F1SCE6;I3LMU0	13.689	13.0981	14.1211	12.5207	14.0028	13.7532	13.0544	14.0534	14.0631	13.4267	13.6509	13.1419	15.102	15.0565	14.6766	15.2995	15.0459	15.1185	14.8867	15.1077	14.6955	15.1134	14.171	14.682	F1SCE6;I3LMU0	SERPINA11	F1SCE6_PIG;I3LMU0_PIG	Serpin family A member 11	0.99874	0.85373	0.0342247	4.97283e-11	0	1.51899	2.67362e-07	1e-05	1.24523	6.91141e-10	0	1.48477	9.18473e-07	3e-05	-1.21101	0.615274	0.86169	-0.273763
531	F1RMX5	15.5437	14.3012	14.6416	14.3852	14.6711	14.1934	14.8174	14.748	14.4837	14.5349	14.906	15.0351	14.3338	14.8795	14.6744	13.7548	14.8373	14.6672	14.3774	14.7131	14.7655	14.5001	14.063	14.6837	F1RMX5	EPHB4	F1RMX5_PIG	EPH receptor B4	0.797631	0.85373	0.131484	0.970969	0.92338	-0.0981988	0.999996	0.83184	-0.105541	0.541133	0.81194	-0.229682	0.851553	0.85274	0.237025	0.969034	0.86169	-0.00734222
532	F1RN71	15.2623	15.142	14.6601	14.8357	14.7243	14.8321	14.7227	15.0039	15.1361	14.3393	14.4635	15.0527	15.3324	14.9344	14.5617	14.8524	15.069	14.7609	14.9089	14.7699	14.5772	14.7329	14.9048	14.7302	F1RN71	BLMH	F1RN71_PIG	Bleomycin hydrolase	0.998473	0.85373	-0.123084	0.954247	0.92338	0.00900942	0.109402	0.39423	-0.138796	0.91201	0.81194	0.132094	0.222851	0.5568	0.0157118	0.026278	0.15694	-0.147805
533	A0A5G2Q7G7;P22411	15.1771	14.9491	14.4201	14.7411	14.8174	14.5077	14.5251	14.7302	15.1268	14.565	14.4374	15.1495	14.6079	14.9803	14.4491	14.6809	14.9972	14.6416	14.7206	14.6476	14.3772	14.5489	14.5479	14.8754	A0A5G2Q7G7;P22411	DPP4	A0A5G2Q7G7_PIG;DPP4_PIG	Dipeptidyl peptidase 4	0.747305	0.85373	-0.013074	0.999972	0.92338	-0.0425669	0.199242	0.57239	-0.149131	0.728587	0.81194	-0.0294929	0.034466	0.17375	0.136057	0.200669	0.67356	-0.106565
534	I3LIM4	14.8544	15.5533	14.8688	14.3589	14.5565	14.3275	15.6502	14.6173	14.7965	14.9482	15.0573	15.0502	12.9934	14.6099	14.4927	15.6188	15.539	14.4067	14.6815	13.8604	13.4845	14.5329	13.9211	15.7756	I3LIM4	DSG2	I3LIM4_PIG	Desmoglein 2	0.880518	0.85373	0.266712	0.99063	0.92338	-0.143156	0.839825	0.83184	-0.377227	0.728854	0.81194	-0.409868	0.40814	0.78622	0.643938	0.946443	0.86169	-0.23407
535	A0A286ZSH3;Q5ISC6	16.5004	14.6658	14.3893	15.1519	14.6763	16.3989	14.5727	15.0331	14.921	14.8632	15.0157	16.7886	15.5781	15.2082	15.1446	16.9043	15.3979	15.1812	15.7309	14.7564	14.8061	14.7271	14.5997	14.645	A0A286ZSH3;Q5ISC6	HEBP1	A0A286ZSH3_PIG;HEBP1_PIG	Heme-binding protein 1	0.989844	0.85373	-0.0980193	0.793816	0.92338	0.271954	0.376474	0.83184	-0.419531	0.935734	0.81194	0.369974	0.284804	0.63327	0.321512	0.0553718	0.27245	-0.691485
536	K7GLU6	14.4665	15.1538	15.1608	15.2218	14.8994	14.9989	14.35	15.2042	14.556	14.8044	15.114	14.6126	14.0891	14.768	14.7638	14.6444	15.109	14.7299	14.7042	14.7966	14.5757	14.5936	15.1158	14.5535	K7GLU6	ERAP1	K7GLU6_PIG	Aminopeptidase	0.51558	0.85373	-0.210026	0.172207	0.75738	-0.299506	0.252405	0.6696	-0.260313	0.904713	0.81194	-0.0894801	0.956066	0.85274	0.0502869	0.99867	0.86169	0.0391932
537	A0A286ZI08;A0A481C881;P79303	14.425	15.124	15.4467	14.8535	14.9732	14.2279	15.0965	14.9567	13.8076	14.7398	15.4757	14.1995	14.2601	13.4395	15.1988	14.472	14.2633	13.9892	14.6083	14.9894	14.5651	13.488	14.7277	14.3764	A0A286ZI08;A0A481C881;P79303	UGP2	A0A286ZI08_PIG;A0A481C881_PIG;UGPA_PIG	UTP--glucose-1-phosphate uridylyltransferase	0.577522	0.85373	-0.129088	0.0628878	0.4358	-0.57124	0.718622	0.83184	-0.382572	0.669035	0.81194	-0.442152	0.997884	0.85274	0.253484	0.5387	0.86169	0.188669
538	F2Z4Z1	14.0558	16.5249	14.3138	14.0992	13.8873	14.5009	15.5898	15.5587	14.8431	16.6075	14.6729	13.123	15.7872	15.4111	13.5276	14.8745	16.1889	16.1193	15.0463	14.8192	12.6203	16.6137	15.7926	13.8794	F2Z4Z1	YWHAG	F2Z4Z1_PIG	Tyrosine 3-monooxygenase/tryptophan 5-monooxygenase activation protein gamma	0.841192	0.85373	0.502202	0.571511	0.92338	0.754454	0.965049	0.83184	0.231624	0.96664	0.81194	0.252252	0.987642	0.85274	0.270578	0.853234	0.86169	-0.52283
539	A0A287BFP3;A0A5G2QRV6;A0A5G2QW74;I3L9I6	15.0148	14.6543	14.4303	14.5748	14.4415	14.8433	14.713	14.9332	15.2949	14.5213	15.0133	14.6796	14.3976	14.8711	14.7044	14.3558	14.6317	14.6322	14.1069	14.7169	14.3989	14.6279	14.7132	14.7876	A0A287BFP3;A0A5G2QRV6;A0A5G2QW74;I3L9I6	BCAM	A0A287BFP3_PIG;A0A5G2QRV6_PIG;A0A5G2QW74_PIG;I3L9I6_PIG	Basal cell adhesion molecule (Lutheran blood group)	0.396567	0.85373	0.199391	0.948288	0.92338	-0.0610394	0.803046	0.83184	-0.101253	0.152956	0.44103	-0.260431	0.0729098	0.28531	0.300644	0.981176	0.86169	-0.0402132
540	A0A286ZUT9;F1RM86	14.2542	14.4237	15.2644	14.8987	15.25	14.2141	15.4895	15.3089	14.7029	15.5265	15.1358	14.2772	14.3487	14.3542	14.8928	14.4232	13.57	14.6986	14.6363	14.6415	14.6833	14.458	15.2528	14.1729	A0A286ZUT9;F1RM86	ADAMDEC1	A0A286ZUT9_PIG;F1RM86_PIG	ADAM like decysin 1	0.856618	0.85373	0.355923	0.137207	0.67237	-0.336247	0.86111	0.83184	-0.0767148	0.0226618	0.10273	-0.69217	1	0.85274	0.432638	0.0207592	0.13363	0.259532
541	A0A287BRX8;A0A5G2RBC6;F1SJL4;O19112	14.6387	14.8263	14.432	14.7093	14.4304	14.9667	14.66	14.3932	15.0349	13.8341	15.3491	14.0328	14.6231	14.357	14.2679	13.3709	14.0579	14.7891	14.1421	14.3657	13.5363	14.0322	13.7838	14.1636	A0A287BRX8;A0A5G2RBC6;F1SJL4;O19112	CILP	A0A287BRX8_PIG;A0A5G2RBC6_PIG;F1SJL4_PIG;CILP1_PIG	Cartilage intermediate layer protein 1;Cartilage intermediate layer protein 1;Cartilage intermediate layer protein 1;Cartilage intermediate layer protein 1 (Fragment)	0.954207	0.85373	-0.116539	0.24731	0.91802	-0.422901	0.0237528	0.12334	-0.66328	0.537581	0.81194	-0.306362	0.0910148	0.32911	0.546741	0.721539	0.86169	-0.240379
542	F1RKG8	15.1024	14.7526	13.4681	14.5093	14.121	14.5679	14.7554	15.7376	15.2412	14.5276	15.0073	14.0789	14.9014	15.1483	14.9368	16.5529	15.124	15.1658	14.0362	13.7542	14.2776	14.6768	14.3473	14.9403	F1RKG8	PEBP1	F1RKG8_PIG	Uncharacterized protein	0.368736	0.85373	0.471113	0.013626	0.16006	0.884661	0.993276	0.83184	-0.081485	0.492969	0.81194	0.413548	0.256598	0.60413	0.552598	0.00567299	0.04816	-0.966146
543	A0A287AMK6;A0A287ATW9;A0A287BCJ7	14.8285	14.3288	13.2498	13.5868	14.0882	20.7013	20.1269	16.1976	14.1896	13.746	14.4381	15.2206	14.0388	15.8774	20.8994	16.6883	20.8309	12.9069	20.5653	21.0457	15.4785	13.3877	15.1205	12.8907	A0A287AMK6;A0A287ATW9;A0A287BCJ7	PHYKPL	A0A287AMK6_PIG;A0A287ATW9_PIG;A0A287BCJ7_PIG	5-phosphohydroxy-L-lysine phospho-lyase	0.988082	0.85373	0.52256	0.683419	0.92338	1.74306	0.8359	0.83184	1.28415	0.860453	0.81194	1.2205	0.953488	0.85274	-0.76159	0.994438	0.86169	-0.458908
544	Q9N178	15.5934	14.7423	15.0474	14.6334	14.74	14.4063	14.0939	13.821	14.0025	14.0304	13.9091	11.6651	14.2214	14.2512	14.8455	14.3228	13.9559	14.6011	14.8011	13.0123	11.6446	13.9266	13.6761	14.6198	Q9N178	COL10A1	Q9N178_PIG	Type X collagen	0.0116795	0.07768	-1.27348	0.671974	0.92338	-0.494167	0.025914	0.12923	-1.24706	0.227134	0.56619	0.779313	0.998687	0.85274	-0.0264168	0.300885	0.84794	-0.752896
545	F6Q194	15.0943	14.6454	14.1785	14.8974	14.7902	15.1207	14.9018	14.461	14.9395	14.6734	14.9018	14.9296	14.6653	14.7969	14.6719	14.3691	14.7245	14.8433	14.4563	14.3076	14.687	14.5092	14.3177	15.041	F6Q194	FGL2	F6Q194_PIG	Fibroleukin	0.999646	0.85373	0.0134266	0.877927	0.92338	-0.10926	0.392522	0.83184	-0.234622	0.832427	0.81194	-0.122687	0.338411	0.71083	0.248049	0.822568	0.86169	-0.125362
546	A0A287A0J2;A0A5G2RDN7;F1RZU6	14.754	14.7582	15.0451	14.3063	13.9373	14.3122	13.7755	14.2976	14.1474	13.7593	14.7726	14.1939	14.8476	14.6141	14.5331	15.3218	14.5929	15.0185	14.3913	14.9075	14.3883	14.4685	13.8719	14.0192	A0A287A0J2;A0A5G2RDN7;F1RZU6	COL21A1	A0A287A0J2_PIG;A0A5G2RDN7_PIG;F1RZU6_PIG	Collagen alpha-1(XXI) chain isoform X1;Collagen type XXI alpha 1 chain;Collagen type XXI alpha 1 chain	0.233782	0.69112	-0.361124	0.424326	0.92338	0.30246	0.755647	0.83184	-0.177742	0.00366968	0.02202	0.663585	0.835705	0.85274	-0.183383	0.0549059	0.27171	-0.480202
547	F1S274	14.6474	14.1233	14.4391	14.5532	14.841	14.7341	14.7542	14.4734	14.3671	14.4719	14.2715	14.313	13.7275	14.4528	14.7702	13.7527	14.272	14.2658	14.469	14.2789	14.4599	14.6015	14.5211	14.4306	F1S274	EXT1	F1S274_PIG	Exostosin glycosyltransferase 1	0.642704	0.85373	-0.114493	0.035744	0.31356	-0.349538	0.998237	0.83184	-0.0962036	0.454541	0.81194	-0.235045	0.792676	0.85274	-0.0182892	0.0655379	0.31236	0.253334
548	A0A287AGW0;A0A287B2Z5	15.5667	14.2908	14.9698	15.1029	14.1823	12.6225	17.5682	14.3996	14.9464	14.3735	13.9227	15.8478	13.9543	16.9518	14.125	14.2408	12.7327	16.0029	16.2408	14.4013	18.9647	18.5204	18.7995	13.4588	A0A287AGW0;A0A287B2Z5	LOC106504547	A0A287AGW0_PIG;A0A287B2Z5_PIG	SERPIN domain-containing protein	0.813133	0.85373	0.720495	0.959724	0.92338	0.212067	0.00798499	0.05298	2.27508	0.981343	0.81194	-0.508427	0.0945951	0.33822	-1.55458	0.0304804	0.17427	2.06301
549	I3LGE9;I3LUE2	15.2651	15.0198	13.4919	14.3192	13.5341	14.4589	15.0571	14.503	14.6203	14.2005	14.9042	15.0076	14.1679	14.4776	14.2934	14.3941	13.9881	14.8249	14.4691	14.6111	14.9909	14.9357	14.5844	14.8028	I3LGE9;I3LUE2	PTPRS	I3LGE9_PIG;I3LUE2_PIG	Protein tyrosine phosphatase receptor type S	0.17988	0.58022	0.367264	0.992753	0.92338	0.00949234	0.199234	0.57239	0.384166	0.304664	0.67883	-0.357771	1	0.85274	-0.0169017	0.302458	0.84794	0.374673
550	F1RFQ7	14.3541	14.9182	14.8037	15.0253	14.6621	14.6195	14.7335	15.3566	14.7599	15.2846	14.215	14.1135	14.9768	15.0316	15.4768	17.0201	15.1845	15.6387	14.4774	14.6841	14.036	15.0603	14.2237	14.0956	F1RFQ7	RAN	F1RFQ7_PIG	GTP-binding nuclear protein Ran	0.999956	0.85373	0.0133765	0.0167601	0.1878	0.82426	0.601125	0.83184	-0.300959	0.018922	0.08773	0.810884	0.570302	0.85274	0.314335	0.000130915	0.00236	-1.12522
551	A0A287A8M1;A0A287B465;I3LDC7	15.9156	14.8491	14.5437	14.2819	14.5598	13.3191	13.9902	15.1126	14.5536	14.3966	15.1571	13.3498	15.1751	14.6133	14.3115	14.6055	14.5916	13.5665	14.4139	14.5764	14.3334	14.9783	14.487	14.4172	A0A287A8M1;A0A287B465;I3LDC7	IDH1	A0A287A8M1_PIG;A0A287B465_PIG;I3LDC7_PIG	Isocitrate dehydrogenase [NADP]	0.966143	0.85373	-0.151564	0.988457	0.92338	-0.100949	0.998631	0.83184	-0.0438399	0.998983	0.81194	0.0506144	0.990938	0.85274	-0.107724	0.998496	0.86169	0.0571096
552	F1SEL6	15.3521	14.5318	14.1182	14.4973	14.1216	14.6167	14.4357	14.5806	14.5876	14.1697	14.5947	14.8304	14.144	14.8767	13.9551	13.87	14.5879	14.4011	13.8104	14.3886	15.0224	14.3773	14.2419	14.719	F1SEL6	GDF2	F1SEL6_PIG	Growth differentiation factor 2	0.572831	0.85373	-0.00650049	0.303587	0.92338	-0.23382	0.569901	0.83184	-0.113011	0.0175793	0.08244	-0.22732	0.0947181	0.33822	0.10651	0.983312	0.86169	0.120809
553	Q6R953	14.5929	14.7377	14.3195	14.6293	14.5969	14.3918	15.8215	14.9163	15.0345	16.535	15.4643	15.7721	14.5176	15.5574	14.2646	14.7406	14.0346	14.9294	15.2579	14.7682	14.7168	16.3646	14.024	15.302	Q6R953	DEFB1	Q6R953_PIG	Beta-defensin 1	0.00171379	0.01616	1.04594	0.934432	0.92338	0.129355	0.167455	0.51468	0.527571	0.0148695	0.07266	-0.916583	0.473867	0.84079	0.518367	0.429979	0.86169	0.398216
554	A0A480KNV0;A0A5G2QFI9;Q2HXZ9	14.2838	10.5628	15.4292	13.0693	14.3941	13.6291	17.366	16.9756	17.9598	17.3829	17.6341	15.7023	15.051	14.6071	14.8209	14.9182	15.11	15.1674	15.7732	17.4208	17.8986	17.3471	16.414	16.5726	A0A480KNV0;A0A5G2QFI9;Q2HXZ9	SAA3	A0A480KNV0_PIG;A0A5G2QFI9_PIG;Q2HXZ9_PIG	Serum amyloid A protein	0	0	3.60872	0.0121163	0.14603	1.38439	2.66454e-15	0	3.34302	6.51203e-07	1e-05	-2.22433	0.992189	0.85274	0.265705	8.08628e-07	3e-05	1.95862
555	A0A286ZQ31	16.0088	14.9457	14.3852	15.2728	14.7248	14.7974	14.8359	15.3836	15.2041	14.7162	14.6335	14.0038	15.8213	16.4686	15.2842	16.5626	15.3001	15.5804	14.5424	14.8911	15.0467	14.3933	14.6101	15.9406	A0A286ZQ31	BPGM	A0A286ZQ31_PIG	Phosphoglycerate mutase	0.858103	0.85373	-0.22627	0.0211148	0.22016	0.813775	0.990566	0.83184	-0.118391	0.00147437	0.0094	1.04004	0.966255	0.85274	-0.107879	0.00818697	0.06505	-0.932165
556	A0A5G2RJ42;P67937	14.4986	14.3526	14.3755	14.6172	14.1481	14.2979	14.7997	15.4581	14.858	15.0296	15.3727	14.3759	14.7649	14.4835	14.9045	16.844	14.202	14.8623	14.4721	14.5352	14.6156	14.2283	14.3792	14.1434	A0A5G2RJ42;P67937	TPM4	A0A5G2RJ42_PIG;TPM4_PIG	Tropomyosin alpha-4 chain	0.117476	0.45403	0.600691	0.128593	0.64158	0.628541	0.997399	0.83184	0.0139673	0.999996	0.81194	0.0278499	0.0876131	0.32037	0.586724	0.0808998	0.35895	-0.614574
557	I3LBK0	12.9208	14.4767	14.3705	14.8815	14.2957	14.8817	14.1318	12.9505	14.3554	13.9206	14.3412	15.7704	17.8505	14.2069	14.512	15.5291	14.3778	13.7786	14.7483	15.9591	13.8771	15.1081	15.1026	14.8782	I3LBK0	NA	I3LBK0_PIG	Ig-like domain-containing protein	0.999208	0.85373	-0.0594729	0.3667	0.92338	0.737997	0.961101	0.83184	0.641083	0.476203	0.81194	0.79747	0.986909	0.85274	-0.700556	0.705749	0.86169	-0.0969142
558	A0A5G2QL81;A0A5G2R1I2	15.4931	15.7878	14.5615	15.0145	14.7948	14.9644	14.3643	16.1354	15.2999	15.0002	15.0417	14.2663	15.8738	15.4021	14.6877	14.9735	14.4816	15.1226	14.3324	14.7022	14.6416	14.4438	14.6355	14.7967	A0A5G2QL81;A0A5G2R1I2	PSMA4	A0A5G2QL81_PIG;A0A5G2R1I2_PIG	Proteasome subunit alpha type	0.98744	0.85373	-0.0847088	0.999996	0.92338	-0.012467	0.27383	0.70748	-0.510654	0.985146	0.81194	0.0722419	0.451134	0.82178	0.425945	0.243888	0.74632	-0.498187
559	A0A287A113;A0A5G2QHL5;A0A5G2QSV4;F1SA60	9.73583	14.1095	14.8116	15.326	14.9786	10.7257	14.4416	15.1403	10.3024	11.783	14.8492	11.2138	14.2222	9.69733	14.7693	16.1529	14.4212	14.8923	14.9779	10.4364	14.9589	15.1903	14.9919	10.2354	A0A287A113;A0A5G2QHL5;A0A5G2QSV4;F1SA60	SPTB	A0A287A113_PIG;A0A5G2QHL5_PIG;A0A5G2QSV4_PIG;F1SA60_PIG	Spectrin beta chain	0.85671	0.85373	-0.326135	0.914485	0.92338	0.744675	0.960685	0.83184	0.18393	0.484651	0.81194	1.07081	0.635655	0.85274	-0.510065	0.999143	0.86169	-0.560745
560	E0A8P1	12.342	13.8054	11.1269	12.3395	11.6742	14.4462	13.5293	17.4535	14.6822	15.4926	16.2656	15.9424	15.0788	14.1206	15.1849	13.3527	15.8827	14.7181	13.7752	15.6263	14.4246	15.4427	14.4114	14.8322	E0A8P1	IGFBP1	E0A8P1_PIG	Insulin-like growth factor-binding protein 1	8.72465e-07	2e-05	2.93857	0.00171937	0.02955	2.10059	0.00258501	0.02161	2.12973	0.410396	0.79734	-0.837974	0.415573	0.7932	0.808842	0.999993	0.86169	0.0291316
561	A0A5G2QQA2;A0A5G2QR31;A0A5G2QTA1;P31950	14.6939	13.8619	14.285	13.6395	12.9591	14.3768	17.7718	14.5367	18.1887	15.22	14.8829	14.6315	12.9872	16.7541	15.3108	15.0316	14.8511	14.143	17.7719	18.6917	13.1774	19.3408	12.6018	18.1453	A0A5G2QQA2;A0A5G2QR31;A0A5G2QTA1;P31950	S100A11	A0A5G2QQA2_PIG;A0A5G2QR31_PIG;A0A5G2QTA1_PIG;S10AB_PIG	Protein S100;Protein S100;Protein S100;Protein S100-A11	0.195651	0.61266	1.90257	0.778773	0.92338	0.876952	0.0296808	0.14511	2.65213	0.740082	0.81194	-1.02561	0.835517	0.85274	-0.74956	0.238667	0.74201	1.77517
562	A0A287AK19;A0A287BED9;A0A5G2R8G3;F1RTN3;P26042	14.8016	14.3772	13.8623	14.4745	14.3832	14.2475	14.2694	16.9964	15.4118	14.9277	15.1742	13.8044	15.089	13.8214	15.0212	15.7671	15.2095	15.2853	14.5546	14.9049	14.4782	14.5607	14.5586	14.1368	A0A287AK19;A0A287BED9;A0A5G2R8G3;F1RTN3;P26042	MSN	A0A287AK19_PIG;A0A287BED9_PIG;A0A5G2R8G3_PIG;F1RTN3_PIG;MOES_PIG	Moesin	0.151143	0.53587	0.739616	0.252583	0.92338	0.674543	0.983671	0.83184	0.174599	0.994855	0.81194	-0.0650728	0.335314	0.70779	0.565017	0.453979	0.86169	-0.499944
563	A0A287AJZ2;A0A287AS83;A0A287AZ24;A0A5G2QER2;A0A5G2QPJ4;A0A5G2RF44;F1SJV2	15.4812	14.9401	13.7919	14.4013	13.8696	14.4699	14.38	14.4158	15.2013	14.4506	14.4037	14.7018	14.5518	14.6384	14.3318	13.8329	14.4411	14.688	13.922	14.2127	14.1433	14.4567	14.5098	14.76	A0A287AJZ2;A0A287AS83;A0A287AZ24;A0A5G2QER2;A0A5G2QPJ4;A0A5G2RF44;F1SJV2	CADM1	A0A287AJZ2_PIG;A0A287AS83_PIG;A0A287AZ24_PIG;A0A5G2QER2_PIG;A0A5G2QPJ4_PIG;A0A5G2RF44_PIG;F1SJV2_PIG	Cell adhesion molecule 1	0.725566	0.85373	0.0998527	0.991322	0.92338	-0.0783465	0.733275	0.83184	-0.158265	0.55271	0.81194	-0.178199	0.224263	0.5587	0.258118	0.871045	0.86169	-0.0799185
564	A0A5G2QQK1	15.0238	14.9236	14.8009	14.0718	13.5846	14.4504	14.9995	14.5472	14.2905	14.5904	14.5232	14.9495	14.5795	14.4654	14.2397	14.8048	14.2897	14.6124	14.412	14.5739	14.2715	14.6938	13.269	13.6492	A0A5G2QQK1	CCER2	A0A5G2QQK1_PIG	Coiled-coil glutamate rich protein 2	0.861638	0.85373	0.174214	0.994807	0.92338	0.0227567	0.650349	0.83184	-0.330925	0.951157	0.81194	-0.151457	0.218343	0.55178	0.505139	0.477005	0.86169	-0.353682
565	A0A287BC40;A0A287BMY5	14.0838	15.6015	14.4347	12.9578	15.6287	13.7683	16.9633	14.4729	14.0656	14.3349	14.1139	14.6972	14.738	14.469	14.2234	14.6672	12.3498	13.1482	13.7935	15.9758	15.8647	14.6539	13.9041	14.4509	A0A287BC40;A0A287BMY5	PLA1A	A0A287BC40_PIG;A0A287BMY5_PIG	Phospholipase A1 member A	0.897531	0.85373	0.362163	0.874735	0.92338	-0.479888	0.751358	0.83184	0.361338	0.469385	0.81194	-0.842051	0.988757	0.85274	0.000824802	0.285579	0.81621	0.841226
566	F1SGG3	14.7255	15.4327	14.5196	16.3344	16.4579	13.9049	14.4577	15.0111	14.166	13.152	15.1442	14.8357	13.0779	15.7217	13.7692	14.1314	13.2298	14.5407	19.352	13.7577	15.7076	14.1472	15.9646	13.8086	F1SGG3	KRT1	F1SGG3_PIG	Keratin 1	0.536431	0.85373	-0.768068	0.404652	0.92338	-1.15074	0.600187	0.83184	0.227083	0.996026	0.81194	-0.382673	0.0535259	0.23051	-0.99515	0.0242837	0.14707	1.37782
567	F1RF79;P24259	14.0261	14.457	13.2878	14.1049	14.0299	14.5252	15.6527	14.4427	15.6815	14.9912	15.2707	15.3427	14.1453	13.3946	13.9766	14.1161	15.2339	14.596	15.0041	15.1455	15.3528	15.9644	14.7292	14.1646	F1RF79;P24259	NPPB;NPPA	F1RF79_PIG;ANF_PIG	Natriuretic peptides B;Natriuretic peptides A	0.000270188	0.00341	1.15847	0.947556	0.92338	0.171944	0.00566165	0.04045	0.988301	0.00237176	0.01466	-0.986526	0.898508	0.85274	0.170169	0.0252366	0.15177	0.816357
568	F1RPH0;Q7SIB7	14.6105	14.0571	13.8853	14.4258	14.3576	14.4281	14.323	16.5528	15.1598	14.6114	15.2711	13.546	13.8754	14.216	14.4932	15.6018	14.219	14.8759	14.0802	18.3415	13.9795	14.2634	14.2618	14.088	F1RPH0;Q7SIB7	PGK1	F1RPH0_PIG;PGK1_PIG	Phosphoglycerate kinase;Phosphoglycerate kinase 1	0.681245	0.85373	0.61659	0.978432	0.92338	0.2528	0.833616	0.83184	0.541648	0.895104	0.81194	-0.36379	0.995401	0.85274	0.0749426	0.966878	0.86169	0.288848
569	P08059	15.7602	14.3666	13.5529	14.2298	13.6238	14.4802	14.1401	16.3814	15.2068	14.8391	15.3008	14.985	15.5706	14.8622	14.5628	15.7484	14.6954	15.0612	14.5777	14.6665	15.4168	14.6087	14.1788	14.4679	P08059	GPI	G6PI_PIG	Glucose-6-phosphate isomerase	0.0249504	0.14464	0.80662	0.076194	0.48984	0.747851	0.826811	0.83184	0.317174	0.971202	0.81194	-0.0587687	0.277859	0.6283	0.489446	0.448824	0.86169	-0.430677
570	F1SJ86	14.789	14.8823	14.0866	14.9557	14.4095	14.6338	14.6364	14.4248	14.7491	13.572	14.8382	14.4157	14.9885	15.0677	14.4009	13.8758	14.6837	14.6218	14.2784	14.1589	13.8935	14.0151	14.0039	13.9397	F1SJ86	CSPG4	F1SJ86_PIG	Chondroitin sulfate proteoglycan 4	0.804362	0.85373	-0.186766	0.999733	0.92338	-0.0197394	0.0215293	0.1132	-0.577886	0.758669	0.81194	0.167027	0.209711	0.53971	0.39112	0.0135816	0.09742	-0.558146
571	A0A5G2QAF6;A0A5G2QZZ4;A0A5G2R7P3;F1S2T5	14.9097	14.804	15.1096	12.4882	14.9812	14.3506	15.2282	14.3277	12.9921	14.9551	15.1377	14.6265	13.0267	14.2001	14.5137	12.3601	13.5228	14.9834	14.197	13.8979	14.5166	13.0245	13.4115	12.9745	A0A5G2QAF6;A0A5G2QZZ4;A0A5G2R7P3;F1S2T5	LTBP2	A0A5G2QAF6_PIG;A0A5G2QZZ4_PIG;A0A5G2R7P3_PIG;F1S2T5_PIG	Latent transforming growth factor beta binding protein 2	0.968278	0.85373	0.104011	0.226884	0.87728	-0.672731	0.910951	0.83184	-0.770247	0.512981	0.81194	-0.776742	0.997248	0.85274	0.874258	0.647288	0.86169	-0.097516
572	F1RN40	13.4658	12.3523	14.2567	14.3262	13.1076	14.4333	13.1401	13.7531	12.9623	14.0252	12.5651	13.8376	14.4049	14.822	14.2644	15.4196	15.1874	14.9342	14.2489	14.1932	14.5291	15.385	15.0184	14.7271	F1RN40	F7	F1RN40_PIG	Uncharacterized protein	0.794964	0.85373	-0.27641	0.00111387	0.02027	1.18172	0.0176735	0.09983	1.02661	1.79096e-05	0.0002	1.45813	0.000736427	0.01043	-1.30302	0.895526	0.86169	-0.155117
573	Q4A3R3	15.3532	13.3569	14.0511	14.3806	13.5711	15.9648	14.0846	14.0478	17.2863	13.7739	14.583	15.8341	18.9333	15.1291	14.5483	15.6041	14.0622	14.9598	15.4428	14.337	15.0142	13.9214	13.4289	17.5815	Q4A3R3	DMBT1	DMBT1_PIG	Deleted in malignant brain tumors 1 protein	0.75713	0.85373	0.488654	0.463298	0.92338	1.09317	0.997802	0.83184	0.508024	0.969219	0.81194	0.604518	0.880787	0.85274	-0.0193698	0.598933	0.86169	-0.585148
574	I3LTK9	15.0926	14.5846	14.5629	14.6048	14.5204	14.4651	14.6534	13.4328	14.3625	13.8417	14.3623	14.2489	14.1147	15.3496	14.55	14.1038	14.2568	13.736	13.543	13.7551	14.7789	14.3117	13.7078	14.0433	I3LTK9	CEL	I3LTK9_PIG	Carboxylic ester hydrolase	0.209004	0.63591	-0.488159	0.246486	0.91802	-0.286611	0.000638835	0.00668	-0.615108	0.998818	0.81194	0.201548	0.291009	0.64443	0.126949	0.145282	0.53998	-0.328497
575	F1SBC8	13.6032	15.1279	14.9158	14.9986	14.5105	14.1383	15.3773	15.0889	14.795	14.658	13.5996	14.3822	14.5814	15.3606	14.9943	15.2702	14.4909	14.8275	15.1888	13.4525	13.5896	13.7945	14.5974	13.0906	F1SBC8	EMILIN2	F1SBC8_PIG	Elastin microfibril interfacer 2	0.987004	0.85373	0.101108	0.472007	0.92338	0.371744	0.44447	0.83184	-0.59685	0.682778	0.81194	0.270636	0.26686	0.61644	0.697959	0.0160297	0.1087	-0.968595
576	A0A287AZA7;A0A2C9F3G2;A0A5G2QDJ2;A7U5U2;F1S911;P0CG68;P63053	14.9045	13.9652	15.1369	14.7692	14.3053	14.9347	15.0858	15.1505	15.8107	15.25	15.0297	14.3075	15.2302	14.8818	14.9331	16.3774	15.3767	14.8278	14.2057	13.7696	16.6318	13.8404	15.5809	14.289	A0A287AZA7;A0A2C9F3G2;A0A5G2QDJ2;A7U5U2;F1S911;P0CG68;P63053	RPS27A;UBC;UBC;UBB;KXD1;UBC;UBA52	A0A287AZA7_PIG;A0A2C9F3G2_PIG;A0A5G2QDJ2_PIG;A7U5U2_PIG;F1S911_PIG;UBC_PIG;RL40_PIG	Ubiquitin-like domain-containing protein;Polyubiquitin-C;Polyubiquitin-C;Ubiquitin B;Ubiquitin-like domain-containing protein;Polyubiquitin-C;Ubiquitin-60S ribosomal protein L40	0.454305	0.85373	0.436381	0.437251	0.92338	0.601856	0.975425	0.83184	0.0502616	1	0.81194	0.165475	0.301532	0.6609	0.38612	0.231697	0.73497	-0.551594
577	A0A5G2QJN1;F1RI57	14.948	14.1467	14.6489	15.0882	14.3102	14.7656	13.9116	14.104	14.1379	13.8485	14.306	14.2727	14.2972	14.752	14.1144	13.2537	14.4836	14.4952	13.1494	13.6724	14.2664	13.7647	14.2667	14.1007	A0A5G2QJN1;F1RI57	LFNG	A0A5G2QJN1_PIG;F1RI57_PIG	Beta-1,3-N-acetylglucosaminyltransferase;Beta-1,3-N-acetylglucosaminyltransferase	0.037959	0.19739	-0.554479	0.161094	0.73282	-0.418565	0.000861822	0.00879	-0.781214	0.939891	0.81194	0.135914	0.623008	0.85274	0.226735	0.269341	0.79607	-0.362649
578	A0A287AQC2;E7EI20	14.93	14.577	13.5512	15.7088	15.6591	15.7443	15.344	15.0392	15.1083	14.2324	15.0089	14.4601	14.3335	14.2747	14.5975	15.933	14.6414	14.8103	14.5083	13.299	14.454	14.291	14.6734	14.8429	A0A287AQC2;E7EI20	ARHGDIA	A0A287AQC2_PIG;E7EI20_PIG	Rho GDP dissociation inhibitor alpha	0.961614	0.85373	-0.162912	0.863818	0.92338	-0.263354	0.195831	0.56845	-0.683637	0.991116	0.81194	-0.100441	0.434059	0.8122	0.520725	0.597155	0.86169	-0.420283
579	A0A5G2QNL3;A0A5G2RF77;I3LPT1	14.9281	13.521	14.249	14.386	14.5164	14.9927	13.8755	16.785	15.4088	15.12	15.9436	14.528	15.4962	13.9786	14.809	15.6209	13.5705	15.0977	14.4826	14.8751	14.6575	13.7534	14.5258	14.9359	A0A5G2QNL3;A0A5G2RF77;I3LPT1	TKT	A0A5G2QNL3_PIG;A0A5G2RF77_PIG;I3LPT1_PIG	Transketolase	0.123483	0.4688	0.844633	0.885483	0.92338	0.32994	0.999992	0.83184	0.106185	0.466717	0.81194	-0.514693	0.152073	0.43756	0.738448	0.896773	0.86169	-0.223756
580	F1STG6;I3LE48	14.5557	14.4177	14.6831	14.3638	14.5149	14.3593	15.1156	14.4561	15.1337	14.288	15.0453	14.5805	13.7903	14.6336	13.901	14.3829	14.4744	14.267	14.5352	14.3187	14.3911	14.7143	13.8079	14.2004	F1STG6;I3LE48	IL1R2	F1STG6_PIG;I3LE48_PIG	Interleukin 1 receptor type 2	0.254074	0.70519	0.287443	0.482884	0.92338	-0.240864	0.874365	0.83184	-0.154499	0.00610809	0.03391	-0.528308	0.0538452	0.23073	0.441942	0.914541	0.86169	0.0863655
581	A0A5G2QR34;F1RIF8	14.8562	14.79	14.4926	14.4472	14.1631	14.7537	14.8771	16.495	15.6572	15.2387	15.8142	14.1372	14.6706	13.9031	14.6665	15.2864	14.404	14.8112	14.5833	14.812	14.477	14.7453	14.4992	14.5215	A0A5G2QR34;F1RIF8	PGD	A0A5G2QR34_PIG;F1RIF8_PIG	6-phosphogluconate dehydrogenase, decarboxylating;6-phosphogluconate dehydrogenase, decarboxylating	0.0100547	0.07151	0.786111	0.999998	0.92338	0.0398227	0.997738	0.83184	0.0226005	0.0111422	0.05754	-0.746288	0.00724707	0.06286	0.76351	0.996862	0.86169	-0.0172222
582	A0A5G2R3T8;I3LEB3	15.0748	14.1021	13.5595	14.4066	14.3883	13.5179	14.5395	14.4069	14.2879	14.0809	14.272	15.0862	14.6626	14.8474	13.2132	14.4338	15.4273	14.5755	14.7162	13.8972	14.6911	15.1286	14.5687	14.614	A0A5G2R3T8;I3LEB3	PCSK1N	A0A5G2R3T8_PIG;I3LEB3_PIG	Proprotein convertase subtilisin/kexin type 1 inhibitor	0.357829	0.84811	0.270692	0.276782	0.92338	0.351775	0.252065	0.6696	0.427759	0.999366	0.81194	0.0810821	0.995477	0.85274	-0.157066	0.999152	0.86169	0.0759841
583	P80310	14.9411	14.6717	14.4559	12.7631	14.5737	13.7964	14.2525	15.5359	13.8035	14.7665	15.0725	14.7421	13.5098	14.8679	14.7022	14.4904	13.3115	14.7229	14.4459	14.4559	15.3938	13.813	11.9715	11.6919	P80310	S100A12	S10AC_PIG	Protein S100-A12	0.742914	0.85373	0.495206	0.980031	0.92338	0.0671415	0.971384	0.83184	-0.57165	0.92422	0.81194	-0.428064	0.539175	0.85274	1.06686	0.840822	0.86169	-0.638791
584	F1SP85;K7GQ34	14.7415	14.2146	14.8037	14.637	14.2631	14.1273	14.7553	14.7435	14.5584	14.7596	14.224	14.678	14.2972	13.9739	14.518	14.4491	15.2039	14.3212	13.8091	14.4033	14.2984	14.3896	14.1877	14.3978	F1SP85;K7GQ34	TEK	F1SP85_PIG;K7GQ34_PIG	TEK receptor tyrosine kinase	0.723976	0.85373	0.155265	0.995997	0.92338	-0.00399506	0.273429	0.70748	-0.216903	0.588724	0.81194	-0.15926	0.0254383	0.14438	0.372168	0.368851	0.86169	-0.212908
585	A0A5G2Q6W7;F1S3J9	14.3454	14.6018	14.5547	14.0303	14.5463	14.1577	15.4648	15.3232	15.2548	15.3497	14.9957	14.8605	14.0695	14.0214	14.5546	14.5081	14.4089	14.1188	15.0027	14.9231	14.5864	15.0746	14.641	14.4422	A0A5G2Q6W7;F1S3J9	ICAM1	A0A5G2Q6W7_PIG;F1S3J9_PIG	Uncharacterized protein;Intercellular adhesion molecule 1	1.47732e-10	0	0.835421	0.906605	0.92338	-0.0924896	0.00713654	0.0479	0.405634	1.24611e-12	0	-0.927911	0.0073419	0.06292	0.429787	0.000407178	0.00519	0.498124
586	A0A287BPW3;P32196	13.71	14.6204	13.9904	13.7721	13.7085	14.6257	18.0545	17.4219	18.3486	17.8038	18.4729	17.8598	14.3545	13.6258	14.407	15.0699	14.661	13.5294	17.4224	17.5616	17.9198	17.9766	17.3588	16.7784	A0A287BPW3;P32196	LOC102159373;NPG3	A0A287BPW3_PIG;PG3_PIG	Uncharacterized protein;Protegrin-3	0	0	3.9224	0.935529	0.92338	0.203406	0	0	3.43175	0	0	-3.71899	0.0233283	0.13693	0.490647	0	0	3.22835
587	A0A286ZVC3;A0A287BJ64;F1RNP2	16.146	14.4182	16.4582	14.725	12.9039	15.188	14.4842	11.8113	15.0065	17.1807	14.3107	13.9314	14.3055	13.8357	13.2131	15.5196	15.2017	12.9026	14.4496	14.2732	14.418	14.4843	14.7277	13.3557	A0A286ZVC3;A0A287BJ64;F1RNP2	AZGP1	A0A286ZVC3_PIG;A0A287BJ64_PIG;F1RNP2_PIG	MHC_I-like_Ag-recog domain-containing protein	0.794833	0.85373	-0.519074	0.29131	0.92338	-0.810196	0.251748	0.6696	-0.688484	0.829652	0.81194	-0.291122	0.774531	0.85274	0.16941	0.999274	0.86169	0.121712
588	A0A287ASK1;A0A287BB68;I3LIE3;I3LV99	14.3977	14.3743	14.0443	13.9591	14.8927	13.7429	14.908	14.973	14.9228	13.9421	15.2156	13.0573	13.1548	13.0727	13.9718	14.8691	14.5118	14.5541	14.5231	14.4385	13.0811	13.6333	14.261	13.7015	A0A287ASK1;A0A287BB68;I3LIE3;I3LV99	MYH11;MYH11;MYH14;MYH14	A0A287ASK1_PIG;A0A287BB68_PIG;I3LIE3_PIG;I3LV99_PIG	Myosin-11;Myosin-11;Myosin heavy chain 14;Myosin heavy chain 14	0.868031	0.85373	0.267988	0.945063	0.92338	-0.212771	0.887911	0.83184	-0.295379	0.550521	0.81194	-0.480759	0.456166	0.82476	0.563367	0.99777	0.86169	-0.0826082
589	A0A5G2R113;I3LRU9	14.6342	14.5842	13.9427	14.1672	14.5393	14.4092	15.0277	14.0625	13.2944	14.0498	14.3198	15.5469	15.2336	14.4605	14.1465	14.1694	14.3751	14.0971	14.1538	13.6113	13.6649	14.1697	12.9357	13.488	A0A5G2R113;I3LRU9	DMKN	A0A5G2R113_PIG;I3LRU9_PIG	Dermokine	0.999998	0.85373	0.00403475	0.972569	0.92338	0.0342267	0.129882	0.43598	-0.708919	0.975378	0.81194	0.030192	0.12526	0.39266	0.712954	0.0385764	0.20247	-0.743146
590	A0A287AKU3;A0A5G2R514	15.4614	14.6584	14.0238	13.9915	14.5809	14.3411	14.0961	14.2621	14.5833	13.4022	14.244	13.6601	13.1223	14.0045	13.5882	13.2941	13.6814	14.3543	13.1889	14.3609	12.672	14.1818	14.1881	15.0734	A0A287AKU3;A0A5G2R514	CDH15	A0A287AKU3_PIG;A0A5G2R514_PIG	Cadherin 15	0.426529	0.85373	-0.4682	0.052318	0.39401	-0.835368	0.432251	0.83184	-0.565327	0.723565	0.81194	-0.367169	0.999981	0.85274	0.0971272	0.746039	0.86169	0.270041
591	A0A287B8T7;I3LS74	14.3705	14.8237	13.9927	14.7379	13.8028	14.9495	14.8903	14.7418	14.5848	14.8374	14.8319	15.3992	14.2105	14.79	13.613	14.3817	14.4696	14.3722	14.1952	15.1951	15.0866	14.7835	14.0163	14.4671	A0A287B8T7;I3LS74	LOC100512873	A0A287B8T7_PIG;I3LS74_PIG	Antileukoproteinase	0.0283217	0.15775	0.434717	0.902791	0.92338	-0.140005	0.975759	0.83184	0.177803	0.00363879	0.02199	-0.574722	0.141831	0.42427	0.256914	0.694972	0.86169	0.317808
592	A5GFT7	14.4214	15.1309	14.0347	14.8055	13.6969	14.9117	14.4424	13.2956	14.3954	13.6648	14.3224	14.3702	14.6327	14.2103	14.0152	14.2725	15.0234	13.6453	14.4035	13.8545	14.1859	14.2092	14.526	12.7218	A5GFT7	GNAS	A5GFT7_PIG	GNAS complex locus	0.71611	0.85373	-0.418403	0.834	0.92338	-0.200296	0.0338927	0.16191	-0.516725	0.995742	0.81194	0.218107	0.397319	0.78097	0.0983219	0.210048	0.69251	-0.316429
593	O18831	14.3646	14.73	14.6695	14.7337	15.326	13.5045	14.5487	14.1288	13.4983	14.409	14.1425	13.6942	13.7398	13.175	14.3793	14.1887	14.4671	15.2234	14.6478	14.6463	13.2119	14.2564	14.3298	13.3396	O18831	MSTN	GDF8_PIG	Growth/differentiation factor 8	0.0028568	0.02501	-0.484461	0.534721	0.92338	-0.35915	0.876549	0.83184	-0.482743	0.140301	0.41631	0.125311	0.0756362	0.29067	-0.00171775	0.950713	0.86169	-0.123593
594	A0A287AU27	14.2976	13.9507	14.1794	14.3058	14.3846	14.8922	14.6984	15.2828	15.6067	14.3386	16.0726	14.7965	14.4877	13.7851	14.0133	13.0762	14.6287	14.0375	14.0373	13.9201	13.2808	13.9352	14.1037	14.2501	A0A287AU27	DSPP	A0A287AU27_PIG	Uncharacterized protein	0.00677002	0.05281	0.797534	0.462974	0.92338	-0.330321	0.234342	0.64042	-0.413854	1.67118e-05	0.00019	-1.12785	2.4082e-06	7e-05	1.21139	0.965389	0.86169	-0.0835325
595	A0A287BNX9	13.6278	15.4516	14.0793	14.7396	13.3872	15.3273	14.6445	14.5301	15.1012	15.0533	14.2166	15.1966	13.7969	14.676	13.3705	12.5988	13.1546	13.7374	14.5016	14.6168	14.9462	12.4027	14.3282	13.7235	A0A287BNX9	NA	A0A287BNX9_PIG	Ig-like domain-containing protein	0.802094	0.85373	0.354942	0.136091	0.67177	-0.879757	0.888098	0.83184	-0.348978	0.0122507	0.06171	-1.2347	0.378648	0.75996	0.70392	0.490257	0.86169	0.530779
596	F1RWY0	15.5046	10.6162	13.8345	16.8426	12.904	14.6959	15.1755	13.9356	15.1505	15.0644	15.4522	0	9.34269	15.5458	15.0783	10.0372	13.7013	14.1528	15.9804	11.5185	15.049	15.1998	5.719	16.4719	F1RWY0	RGN	F1RWY0_PIG	Regucalcin	0.767034	0.85373	-1.60327	0.911307	0.92338	-1.08995	0.993759	0.83184	-0.743171	0.989467	0.81194	0.513319	0.915752	0.85274	-0.860096	0.980875	0.86169	0.346777
597	A0A287BQ72;F1RYY6	14.775	14.2647	13.2614	14.9441	14.1953	14.878	14.2662	16.416	15.4314	14.7472	15.2647	14.8112	14.8385	14.264	14.3015	15.5265	14.775	14.7327	14.3394	14.8297	14.9667	14.5894	14.4187	14.7054	A0A287BQ72;F1RYY6	TALDO1	A0A287BQ72_PIG;F1RYY6_PIG	Transaldolase	0.0388535	0.19962	0.769727	0.666917	0.92338	0.3533	0.894259	0.83184	0.255127	0.434742	0.81194	-0.416426	0.239709	0.57705	0.514599	0.976327	0.86169	-0.0981732
598	P79380	14.5002	14.3181	14.9984	15.1708	14.8344	15.1559	14.4287	13.607	14.755	11.8599	14.1384	14.3491	14.8955	14.5526	12.1774	13.2946	14.365	11.2417	14.3546	11.7648	13.9952	13.6673	15.336	11.9412	P79380	MT2B	MT2B_PIG	Metallothionein-2B	0.490301	0.85373	-0.973282	0.079287	0.50053	-1.40849	0.0780773	0.30998	-1.31977	0.77719	0.81194	-0.435212	0.758502	0.85274	0.346484	0.999722	0.86169	0.0887273
599	A0A287AC25;A0A2C9F362;A0A2C9F3F9;A0A5G2QR94;F1SRJ7;I3LBI3;K7GM05;K7GR74;P16545	14.7104	14.5432	14.906	14.7802	15.1318	14.9083	14.9378	14.2041	14.0721	14.4249	14.4828	12.9033	13.232	13.9527	14.2356	14.1969	14.0701	14.4089	14.0331	14.208	12.992	14.1128	14.1585	14.2052	A0A287AC25;A0A2C9F362;A0A2C9F3F9;A0A5G2QR94;F1SRJ7;I3LBI3;K7GM05;K7GR74;P16545	IGF1	A0A287AC25_PIG;A0A2C9F362_PIG;A0A2C9F3F9_PIG;A0A5G2QR94_PIG;F1SRJ7_PIG;I3LBI3_PIG;K7GM05_PIG;K7GR74_PIG;IGF1_PIG	Insulin-like growth factor I;Insulin-like growth factor I;Insulin-like growth factor I;Insulin-like growth factor I;Insulin-like growth factor 1 transcript variant 6;Insulin-like growth factor I;Insulin-like growth factor I;Insulin-like growth factor I;Insulin-like growth factor I	0.00147168	0.01419	-0.659159	0.00105788	0.01963	-0.813954	0.00621463	0.04259	-0.878412	0.999999	0.81194	-0.154795	0.99188	0.85274	0.219253	0.990558	0.86169	-0.0644582
600	A0A286ZXX3;F6QA36	14.6173	14.0958	14.3071	13.5096	14.3162	14.5912	14.7913	16.4272	15.7748	14.842	15.8832	14.2447	14.7941	14.0489	14.7	15.0821	13.9216	14.6268	14.9664	14.756	14.9217	13.9718	14.1926	14.2316	A0A286ZXX3;F6QA36	ACTR2	A0A286ZXX3_PIG;F6QA36_PIG	Actin-related protein 2	0.00104961	0.01085	1.08765	0.768099	0.92338	0.289396	0.826765	0.83184	0.267135	0.0327602	0.139	-0.798254	0.0307113	0.16049	0.820515	0.999741	0.86169	-0.022261
601	A0A286ZU93;F1RY44	14.2478	18.24	15.1742	14.2501	13.8671	15.5815	14.9416	13.8299	13.6729	14.1152	13.7336	14.1037	15.798	13.5757	16.0719	15.2367	16.0668	14.5833	15.6573	13.6198	14.4712	15.4337	13.8749	13.8241	A0A286ZU93;F1RY44	CDH17	A0A286ZU93_PIG;F1RY44_PIG	Cadherin-17;Cadherin 17	0.164922	0.55376	-1.16064	1	0.92338	-0.00471033	0.588524	0.83184	-0.746637	0.168597	0.46841	1.15593	0.880636	0.85274	-0.414006	0.565999	0.86169	-0.741926
602	A0A287AU22;A0A287B8K4	13.9704	13.6862	13.9741	14.2	13.706	13.227	14.5477	14.7781	14.9189	14.3345	15.0729	14.2962	14.2048	13.9379	14.4471	14.0131	14.1432	14.4451	13.6527	13.2119	13.6104	14.4993	13.634	13.4041	A0A287AU22;A0A287B8K4	PLVAP	A0A287AU22_PIG;A0A287B8K4_PIG	Plasmalemma vesicle associated protein	5.40503e-06	0.00012	0.864108	0.122542	0.62141	0.404602	0.840149	0.83184	-0.12523	0.0397397	0.15579	-0.459507	8.63796e-08	0	0.989339	0.012116	0.08892	-0.529832
603	I3LAK9	15.2018	13.9562	13.0463	14.0121	14.9745	10.3502	15.326	14.5894	13.5471	14.5116	15.5165	15.3311	14.6753	14.4292	13.492	14.5375	13.7847	14.5175	0	14.1978	15.011	13.1455	13.565	0	I3LAK9	ADAMTS2	I3LAK9_PIG	ADAM metallopeptidase with thrombospondin type 1 motif 2	0.926473	0.85373	1.21342	0.994386	0.92338	0.649179	0.108975	0.39423	-4.2703	0.983935	0.81194	-0.564241	0.0225248	0.13374	5.48372	0.0511424	0.259	-4.91948
604	A0A286ZVC4;A0A287BQK7;F1SLX4	14.5022	14.9366	14.5406	14.979	13.9182	14.9333	14.0632	14.3708	15.1634	13.7371	14.2538	14.9573	14.8559	15.0533	14.4373	14.0036	14.3032	14.132	14.1432	13.7786	14.2721	13.9943	13.5755	14.4173	A0A286ZVC4;A0A287BQK7;F1SLX4	PTPRZ1	A0A286ZVC4_PIG;A0A287BQK7_PIG;F1SLX4_PIG	Protein tyrosine phosphatase receptor type Z1	0.995862	0.85373	-0.210699	0.799787	0.92338	-0.170757	0.000491325	0.00535	-0.604806	0.914896	0.81194	0.0399425	0.00397727	0.03868	0.394107	0.0103614	0.07875	-0.434049
605	A0A286ZT02;A0A287AUX9;A0A5G2QQ19;F1RPW8	13.8183	13.1048	13.109	13.9994	13.8793	16.3038	9.19293	13.8169	14.2445	13.5757	12.8016	15.7181	13.0039	12.643	16.7024	14.423	13.8969	17.5308	13.5723	12.7227	13.6017	13.429	13.5782	14.319	A0A286ZT02;A0A287AUX9;A0A5G2QQ19;F1RPW8	ASRGL1	A0A286ZT02_PIG;A0A287AUX9_PIG;A0A5G2QQ19_PIG;F1RPW8_PIG	Asparaginase and isoaspartyl peptidase 1	0.774668	0.85373	-0.81081	0.888303	0.92338	0.664227	0.906265	0.83184	-0.498631	0.339651	0.71065	1.47504	0.994501	0.85274	-0.312179	0.490559	0.86169	-1.16286
606	A0A287AHQ0;A0A287AV07;F1SB62	14.1743	14.2513	13.7676	13.8465	14.2924	13.448	13.8513	15.5211	15.2121	13.7957	14.382	13.7431	13.9981	15.2988	15.2864	15.299	13.3896	14.0734	15.1663	15.3649	13.1108	14.1887	14.3021	14.9683	A0A287AHQ0;A0A287AV07;F1SB62	ACAT2	A0A287AHQ0_PIG;A0A287AV07_PIG;F1SB62_PIG	Acetyl-CoA acetyltransferase 2	0.618248	0.85373	0.454212	0.317594	0.92338	0.594219	0.323521	0.77082	0.553506	0.957299	0.81194	0.140008	0.953333	0.85274	-0.0992946	0.999992	0.86169	-0.040713
607	A0A287A0J1;A0A287A6Y9;A0A287AGU7;A0A287AHL4;A0A287AZ37;A0A287B5H7;F2Z5B2;P02554;Q767L7	13.2621	14.3077	14.6139	13.6191	13.8031	12.6428	14.6376	14.8451	14.8122	14.3934	14.8174	15.2228	15.4881	13.6257	13.8402	15.9346	12.6031	14.5316	13.9091	14.1832	13.851	14.3938	14.047	14.0662	A0A287A0J1;A0A287A6Y9;A0A287AGU7;A0A287AHL4;A0A287AZ37;A0A287B5H7;F2Z5B2;P02554;Q767L7	TUBB2B;TUBB2B;TUBB2B;TUBB2B;TUBB2B;TUBB2B;TUBB;;TUBB	A0A287A0J1_PIG;A0A287A6Y9_PIG;A0A287AGU7_PIG;A0A287AHL4_PIG;A0A287AZ37_PIG;A0A287B5H7_PIG;F2Z5B2_PIG;TBB_PIG;TBB5_PIG	Tubulin beta chain	0.027104	0.15401	1.07998	0.374955	0.92338	0.629121	0.802363	0.83184	0.366922	0.649356	0.81194	-0.450858	0.27208	0.62257	0.713056	0.90458	0.86169	-0.262199
608	K7GL28	14.5354	14.4582	13.8768	14.1338	14.3794	14.5298	14.0341	14.8141	14.441	14.0305	13.5494	14.464	14.5681	14.6722	14.4414	14.1506	14.4406	14.7536	14.3634	13.8001	13.7184	14.0899	14.2822	14.4904	K7GL28	F8	K7GL28_PIG	Coagulation factor VIII	0.941519	0.85373	-0.0967024	0.297086	0.92338	0.18551	0.88144	0.83184	-0.194849	0.0992929	0.31774	0.282212	0.997891	0.85274	0.0981469	0.0622457	0.29947	-0.380359
609	A0A287AY64;A0A5G2QA01;A0A5G2QIT8;A0A5G2QSD6	14.8676	14.832	13.8083	14.3808	14.3335	14.0423	14.3867	14.4951	14.8429	13.8677	15.0207	12.9415	14.2344	14.0475	13.1044	14.2271	14.1222	14.0973	14.1013	14.1678	14.1365	14.4855	14.2934	14.2511	A0A287AY64;A0A5G2QA01;A0A5G2QIT8;A0A5G2QSD6	GLIPR2	A0A287AY64_PIG;A0A5G2QA01_PIG;A0A5G2QIT8_PIG;A0A5G2QSD6_PIG	GLI pathogenesis related 2	0.968001	0.85373	-0.118299	0.403662	0.92338	-0.405264	0.955163	0.83184	-0.13814	0.68832	0.81194	-0.286964	0.999865	0.85274	0.0198402	0.732999	0.86169	0.267124
610	A0A287AAB8;A0A5G2QNS3;F1SUS0	14.8451	14.3537	14.2616	14.5677	14.3072	14.6848	14.4192	14.2782	14.2229	13.7201	14.5549	14.5454	14.2644	14.2718	13.9998	13.3742	14.2761	14.4375	13.8074	13.9957	14.2855	13.7887	13.7283	14.0998	A0A287AAB8;A0A5G2QNS3;F1SUS0	MFAP2	A0A287AAB8_PIG;A0A5G2QNS3_PIG;F1SUS0_PIG	Microfibril associated protein 2	0.48653	0.85373	-0.213254	0.0625823	0.4358	-0.399407	0.00609939	0.0424	-0.55246	0.704707	0.81194	-0.186152	0.233624	0.57041	0.339206	0.827203	0.86169	-0.153054
611	A0A287A034;A0A287B336;Q28942	16.104	15.7942	15.8388	12.5128	11.8667	15.4421	13.6269	13.7934	13.7404	12.936	13.8432	13.9822	16.1312	11.5664	12.0425	12.1009	14.7746	16.0433	17.179	13.7868	17.1277	13.9366	12.9833	13.4909	A0A287A034;A0A287B336;Q28942	FCGR3A;FCGR3A;FCGR3	A0A287A034_PIG;A0A287B336_PIG;FCGR3_PIG	Uncharacterized protein;Uncharacterized protein;Low affinity immunoglobulin gamma Fc region receptor III	0.716525	0.85373	-0.939435	0.851809	0.92338	-0.816666	0.981849	0.83184	0.157598	0.995045	0.81194	0.12277	0.499648	0.85274	-1.09703	0.632679	0.86169	0.974264
612	A0A287A078;F1S663	14.693	14.5928	14.1228	14.2412	14.0065	14.5584	14.0668	14.5114	14.7747	14.3582	14.8148	14.4208	13.7169	13.9319	14.0946	13.9698	14.3402	14.5736	13.8222	14.1511	14.2423	13.9744	13.6653	13.9766	A0A287A078;F1S663	LAMC1	A0A287A078_PIG;F1S663_PIG	Uncharacterized protein	0.82984	0.85373	0.121992	0.24379	0.91224	-0.264632	0.0301008	0.1463	-0.39716	0.0341894	0.14381	-0.386624	0.00216508	0.0241	0.519152	0.778188	0.86169	-0.132528
613	A0A287AE47;A0A287B310	13.0437	13.9711	13.5274	13.528	13.0656	13.9039	13.8637	14.7889	15.4496	14.5084	15.1688	14.2971	15.633	12.9391	13.5524	16.0419	14.5687	13.5702	14.143	14.2635	12.6334	14.4552	14.1356	14.3108	A0A287AE47;A0A287B310	STOM	A0A287AE47_PIG;A0A287B310_PIG	Stomatin	9.21553e-05	0.00141	1.17279	0.0177157	0.19117	0.877595	0.989244	0.83184	0.483622	0.450389	0.81194	-0.295194	0.00186616	0.02132	0.689167	0.0577513	0.28256	-0.393973
614	A0A5G2QYG4;A0A5K1VAR5;F1RL75	14.7076	14.6974	13.7766	14.341	13.7117	14.5653	13.9327	13.6637	14.4187	13.6987	14.496	14.266	14.3006	14.3207	13.83	14.0414	13.8657	14.3912	14.1627	13.8455	14.0365	14.0302	13.8603	14.3778	A0A5G2QYG4;A0A5K1VAR5;F1RL75	PDGFRB	A0A5G2QYG4_PIG;A0A5K1VAR5_PIG;F1RL75_PIG	Platelet-derived growth factor receptor beta	0.87344	0.85373	-0.220625	0.720539	0.92338	-0.175005	0.190628	0.56156	-0.247763	0.993475	0.81194	0.0456208	0.648719	0.85274	0.0271372	0.74243	0.86169	-0.072758
615	A0A287AUK6;F1RGR4	14.8839	13.9489	13.8358	13.7643	13.9393	14.175	14.3701	14.8227	14.2466	14.1576	14.8801	14.6322	13.7924	14.0579	13.8314	13.3263	14.0906	13.6573	13.167	13.8442	13.3779	13.6513	13.745	13.8143	A0A287AUK6;F1RGR4	EFNA1	A0A287AUK6_PIG;F1RGR4_PIG	Ephrin-A1	0.0539859	0.25279	0.427006	0.337643	0.92338	-0.298552	0.03906	0.18166	-0.491246	0.000202693	0.00171	-0.725557	1.24752e-06	4e-05	0.918252	0.720613	0.86169	-0.192694
616	F1RQW7	14.3655	14.1522	13.8078	14.4409	13.7887	14.9901	14.715	14.6105	15.1783	14.4259	15.1223	14.6633	13.846	14.0345	13.3223	13.7538	13.9403	13.4992	14.2288	14.8979	15.6178	14.912	14.8945	14.7473	F1RQW7	C2	F1RQW7_PIG	Uncharacterized protein	1.87479e-06	4e-05	0.528372	9.2226e-05	0.00329	-0.524849	0.0202163	0.10827	0.62554	0	0	-1.05322	0.230951	0.5655	-0.0971681	4.55114e-12	0	1.15039
617	I3LKI1	14.874	14.3513	14.8044	12.8801	14.1297	14.6118	15.1122	13.9744	15.0338	15.5076	13.8914	13.9585	14.0748	13.8197	15.5135	13.7002	14.7096	14.7995	12.4879	13.3989	10.4273	13.1124	14.0296	14.2963	I3LKI1	SRGN	I3LKI1_PIG	Serglycin	0.925667	0.85373	0.304418	0.993312	0.92338	0.160981	0.0336827	0.16183	-1.3165	0.985555	0.81194	-0.143437	0.00509351	0.04694	1.62092	0.0123902	0.09017	-1.47748
618	A0A287A9T7	14.3584	14.1104	13.8298	14.5897	13.8126	14.6362	14.2253	14.1976	14.3787	14.2305	14.1434	14.8763	14.2439	14.277	14.1333	13.4633	14.3194	13.7541	13.9205	14.08	14.5604	14.4023	14.5541	14.3202	A0A287A9T7	AXL	A0A287A9T7_PIG	Uncharacterized protein	0.418939	0.85373	0.119106	0.458306	0.92338	-0.191015	0.993798	0.83184	0.0834134	0.0175382	0.08244	-0.310121	0.363456	0.74666	0.0356929	0.653111	0.86169	0.274428
619	A0A287B088	15.2495	15.0007	13.9088	14.4952	14.285	14.5926	14.1977	16.2111	15.2008	14.5333	14.7563	13.9104	15.5421	14.5861	14.506	14.8861	14.5303	14.692	14.2851	14.5297	14.3579	13.9596	14.2715	14.3039	A0A287B088	PSMB4	A0A287B088_PIG	Proteasome subunit beta	0.866675	0.85373	0.212969	0.867584	0.92338	0.201809	0.759187	0.83184	-0.304009	1	0.81194	-0.0111598	0.306839	0.66911	0.516978	0.28438	0.81621	-0.505818
620	A0A286ZX26	13.986	14.2648	13.4417	14.6034	13.4211	14.7675	13.4557	14.4171	15.0893	13.5012	13.8424	14.0733	14.2797	14.1519	13.7415	13.4957	14.5053	14.0838	13.7106	14.2309	14	14.059	13.9978	14.4882	A0A286ZX26	CTSD	A0A286ZX26_PIG	Cathepsin D	0.933444	0.85373	-0.0175823	0.991493	0.92338	-0.0377655	0.754083	0.83184	0.000338722	0.819662	0.81194	-0.0201832	0.462243	0.83049	-0.017921	0.885432	0.86169	0.0381042
621	F1SQ22;K7GMU1	13.6436	14.2995	14.2252	14.7716	14.0848	14.3176	14.525	14.0503	14.3495	14.1221	14.2941	14.158	14.0936	13.6477	14.3651	13.7114	14.033	14.3529	14.1009	14.1445	13.9657	14.5945	14.7439	13.9117	F1SQ22;K7GMU1	CD86	F1SQ22_PIG;K7GMU1_PIG	CD86 molecule	0.998323	0.85373	0.0261256	0.456956	0.92338	-0.189764	0.999819	0.83184	0.0198138	0.58938	0.81194	-0.21589	0.999827	0.85274	0.0063118	0.532052	0.86169	0.209578
622	A0A286ZMI3;A0A480TBA9;I3LIF2	14.9688	14.1135	14.0428	15.0102	14.0823	14.9638	13.9194	14.2408	14.1943	13.4195	13.746	14.2421	14.4955	14.0457	14.3081	13.9927	14.581	14.2799	13.9331	13.9639	14.4509	14.2218	13.9829	14.3905	A0A286ZMI3;A0A480TBA9;I3LIF2	CLSTN1	A0A286ZMI3_PIG;A0A480TBA9_PIG;I3LIF2_PIG	Calsyntenin 1	0.0146208	0.09362	-0.569872	0.432658	0.92338	-0.246419	0.0564794	0.24339	-0.373038	0.444226	0.81194	0.323453	0.982582	0.85274	-0.196834	0.694293	0.86169	-0.126619
623	F1RMV7	14.2868	14.0724	15.2829	14.0623	14.824	13.518	14.714	14.4188	14.0428	13.9232	14.243	14.4915	13.1957	14.5295	14.3138	13.7839	14.1271	13.9945	13.966	12.6688	14.6001	13.8968	13.5079	13.7673	F1RMV7	LYPD3	F1RMV7_PIG	LY6/PLAUR domain containing 3	0.972736	0.85373	-0.0355	0.531903	0.92338	-0.350304	0.355439	0.81451	-0.606553	0.814787	0.81194	-0.314804	0.665094	0.85274	0.571053	0.984094	0.86169	-0.256249
624	F1STR1	13.5652	14.1603	14.7634	14.1166	14.7403	13.8423	14.828	15.2784	14.9102	14.942	15.242	13.1357	14.1586	13.3479	14.5696	14.441	15.3637	14.0174	14.6252	14.9421	12.918	15.0428	14.8975	13.7053	F1STR1	CTSC	F1STR1_PIG	Cathepsin C	0.815557	0.85373	0.524693	0.995261	0.92338	0.118357	0.931077	0.83184	0.157152	0.91813	0.81194	-0.406336	0.995349	0.85274	0.367541	0.980691	0.86169	0.0387948
625	A0A287A0A9;F1S3P6;O19113	13.8492	13.8452	13.0058	13.4102	12.4936	13.9845	14.391	14.7033	14.2497	14.1516	15.048	14.2756	13.8985	13.9297	14.2434	15.125	13.9761	13.5378	14.2568	14.4264	15.1872	14.2577	14.212	14.1268	A0A287A0A9;F1S3P6;O19113	CCN2	A0A287A0A9_PIG;F1S3P6_PIG;CCN2_PIG	CCN family member 2	0.000100803	0.00152	1.03846	0.040784	0.332	0.687018	0.00163777	0.01505	0.979764	0.399234	0.78211	-0.351447	0.957753	0.85274	0.0587004	0.721904	0.86169	0.292746
626	A0A287BLX5;F1S1E7	15.2845	14.114	14.2857	13.7863	14.9893	13.3932	14.5068	16.3127	13.8497	15.387	15.6755	13.3088	12.9851	13.7098	13.7002	14.5588	11.9204	14.7521	14.2551	15.1101	14.3451	14.7128	13.8088	12.9974	A0A287BLX5;F1S1E7	DPYS	A0A287BLX5_PIG;F1S1E7_PIG	Dihydropyrimidinase	0.870215	0.85373	0.531249	0.38278	0.92338	-0.704442	0.902884	0.83184	-0.103959	0.0973756	0.31407	-1.23569	0.999932	0.85274	0.635208	0.110354	0.44381	0.600483
627	A0A286ZKR8;A0A5G2QEX1;F1RFB1	14.7743	14.4199	14.0874	14.2728	14.4352	14.2258	13.8913	14.4269	14.227	14.43	13.9161	14.3191	13.9393	14.7106	13.6892	13.8427	14.2761	14.5415	13.8939	13.862	13.59	13.8552	14.3694	13.8515	A0A286ZKR8;A0A5G2QEX1;F1RFB1	PKD1	A0A286ZKR8_PIG;A0A5G2QEX1_PIG;F1RFB1_PIG	Polycystin 1, transient receptor potential channel interacting;Polycystin 1, transient receptor potential channel interacting;Polycystin 1, transient receptor potential channel interacting	0.602078	0.85373	-0.167493	0.664271	0.92338	-0.202665	0.0391133	0.18166	-0.465566	0.999754	0.81194	-0.0351721	0.461861	0.83049	0.298074	0.388511	0.86169	-0.262901
628	A0A287B8B1;A0A5G2QYZ3;A0A5G2R2Q0;F1SRB9	16.225	15.5887	15.6159	13.5764	14.5763	13.9856	14.0056	15.8411	14.5583	14.9539	15.2395	13.8898	13.6973	13.4406	14.442	16.0161	14.0639	14.7998	13.8763	13.3025	15.9371	13.695	13.7287	13.3114	A0A287B8B1;A0A5G2QYZ3;A0A5G2R2Q0;F1SRB9	ST13	A0A287B8B1_PIG;A0A5G2QYZ3_PIG;A0A5G2R2Q0_PIG;F1SRB9_PIG	ST13 Hsp70 interacting protein	0.966541	0.85373	-0.179938	0.687803	0.92338	-0.518022	0.309914	0.76427	-0.952825	0.92479	0.81194	-0.338084	0.613082	0.85274	0.772887	0.905554	0.86169	-0.434803
629	Q0KKC2	15.1518	14.3397	14.3727	14.0685	13.6035	14.1381	13.7025	13.8087	14.3397	13.8982	13.5629	13.7738	15.3887	13.912	14.2902	16.8235	13.7588	14.1084	15.3698	13.9795	13.6376	13.763	13.2149	13.8344	Q0KKC2	MGAT1	Q0KKC2_PIG	Mannosyl (alpha-1,3-)-glycoprotein beta-1,2-N-acetylglucosaminyltransferase	0.697861	0.85373	-0.431435	0.698592	0.92338	0.434538	0.870936	0.83184	-0.312527	0.133832	0.40003	0.865973	0.991541	0.85274	-0.118908	0.242576	0.74495	-0.747065
630	F1RFV5	14.8991	14.981	13.4995	14.26	14.0895	14.0352	13.8161	15.3002	14.7499	13.814	14.4704	14.2165	15.0685	14.6188	15.0102	14.8623	14.6389	14.4566	13.9777	14.1462	13.8642	13.5634	14.8225	13.7732	F1RFV5	PSMB6	F1RFV5_PIG	Proteasome subunit beta	0.97722	0.85373	0.100451	0.177122	0.77169	0.481825	0.816357	0.83184	-0.269535	0.364011	0.73342	0.381374	0.580575	0.85274	0.369986	0.0181313	0.11986	-0.75136
631	K7GPY4;Q2QLE0	13.8842	14.0781	14.3149	14.2472	14.0363	13.837	14.6234	14.4103	14.3657	14.3638	13.5567	14.1983	14.0279	13.7295	14.2004	14.1051	14.3275	14.5568	14.2844	14.0392	14.1156	14.6812	15.0692	13.0095	K7GPY4;Q2QLE0	MET	K7GPY4_PIG;MET_PIG	Hepatocyte growth factor receptor	0.841672	0.85373	0.186769	0.969855	0.92338	0.0916178	0.910609	0.83184	0.13357	0.982501	0.81194	-0.0951517	0.999071	0.85274	0.0531996	0.995675	0.86169	0.0419521
632	A0A5G2QIK1;Q0R678	14.6295	14.3715	14.2931	14.4007	14.0418	14.1989	13.8186	15.3799	14.6309	14.1632	14.9917	13.5335	14.2854	14.0569	14.2537	15.4315	14.3597	14.7618	13.9868	13.651	14.1755	13.8248	13.7196	13.7761	A0A5G2QIK1;Q0R678	PARK7	A0A5G2QIK1_PIG;Q0R678_PIG	DJ-1_PfpI domain-containing protein;DJ-1 protein	0.977153	0.85373	0.0970812	0.868811	0.92338	0.202278	0.171707	0.52096	-0.466915	0.983519	0.81194	0.105197	0.0698105	0.27444	0.563997	0.022545	0.14148	-0.669194
633	A0A5G2RI62;F1RFV3	14.4452	13.9564	12.8652	14.7256	14.4317	14.3496	14.1478	14.1893	14.3668	13.7493	14.3915	14.2685	14.5706	14.5091	14.283	14.1039	14.4748	14.0864	13.6305	13.7438	13.3637	14.5817	14.6646	15.0082	A0A5G2RI62;F1RFV3	VMO1	A0A5G2RI62_PIG;F1RFV3_PIG	Uncharacterized protein;Vitelline membrane outer layer protein 1 homolog	0.991367	0.85373	0.056572	0.855715	0.92338	0.208996	0.999996	0.83184	0.0364455	0.958412	0.81194	0.152424	0.99406	0.85274	0.0201265	0.868153	0.86169	-0.17255
634	A0A287ATV4;A0A287B4G4;A0A5G2QQK3;A0A5G2R1K1;A0A5G2R6S0;I3LKU0	13.088	14.2948	13.5637	14.1027	13.645	14.3937	14.2002	15.6439	15.7625	15.096	15.4392	13.4485	14.3796	14.054	14.3993	16.1813	14.4457	14.6975	13.8356	14.496	13.8889	14.719	13.9427	14.4412	A0A287ATV4;A0A287B4G4;A0A5G2QQK3;A0A5G2R1K1;A0A5G2R6S0;I3LKU0	RAC3;RAC1;RAC1;RAC2;RAC2;RAC2	A0A287ATV4_PIG;A0A287B4G4_PIG;A0A5G2QQK3_PIG;A0A5G2R1K1_PIG;A0A5G2R6S0_PIG;I3LKU0_PIG	Rac family small GTPase 3;Rac family small GTPase 1;Rac family small GTPase 1;Rac family small GTPase 2;Rac family small GTPase 2;Rac family small GTPase 2	0.00349412	0.02998	1.08372	0.0908553	0.53835	0.8449	0.949596	0.83184	0.372562	0.718923	0.81194	-0.238816	0.0288237	0.1571	0.711153	0.282526	0.81556	-0.472338
635	O62680	14.7995	14.354	13.6875	14.2552	13.5613	13.7247	14.5021	15.1667	14.0291	14.1974	13.6395	14.7861	14.2847	13.8293	12.7458	14.0117	14.5563	13.4569	13.2349	14.1578	13.5695	13.8739	13.9185	14.443	O62680	CD59	CD59_PIG	CD59 glycoprotein	0.348755	0.84811	0.323111	0.835943	0.92338	-0.249595	0.7801	0.83184	-0.197441	0.0666286	0.23334	-0.572706	0.0748334	0.28941	0.520552	0.998925	0.86169	0.052154
636	A0A287BBC0;A0A5G2QZT2;A0A5G2RLA8;F1RPW3	13.8742	14.5705	14.1571	13.5915	14.1725	12.6253	14.5946	14.3997	14.3309	13.532	14.2283	14.6446	14.316	14.236	14.0497	14.6573	13.6135	14.2317	14.5856	14.2716	14.3399	14.5597	14.1425	13.0493	A0A287BBC0;A0A5G2QZT2;A0A5G2RLA8;F1RPW3	SELP	A0A287BBC0_PIG;A0A5G2QZT2_PIG;A0A5G2RLA8_PIG;F1RPW3_PIG	Uncharacterized protein	0.228857	0.6818	0.456503	0.28549	0.92338	0.352175	0.209543	0.59382	0.326258	0.99955	0.81194	-0.104328	0.999586	0.85274	0.130246	0.996472	0.86169	-0.025918
637	K7GPF5	14.6231	14.4	14.0579	14.1935	14.4584	14.4753	14.0165	14.3422	14.1885	13.6193	14.6962	13.8286	13.8073	14.0708	14.165	13.5259	14.3669	14.5688	14.1257	14.0833	13.8707	14.111	13.8267	13.6209	K7GPF5	CD248	K7GPF5_PIG	CD248 molecule	0.355611	0.84811	-0.252798	0.352795	0.92338	-0.283898	0.0891336	0.34498	-0.428305	0.999998	0.81194	-0.0310999	0.877381	0.85274	0.175507	0.877643	0.86169	-0.144407
638	K7GS67	13.378	14.3364	13.7973	14.4387	13.3948	14.0982	13.3859	13.8689	14.7643	12.9033	13.0481	14.3465	14.3739	14.0698	13.8179	14.5232	13.959	14.2116	14.2454	14.1553	12.9444	14.3658	13.9937	14.0661	K7GS67	CD55	K7GS67_PIG	Uncharacterized protein	0.972455	0.85373	-0.187769	0.290921	0.92338	0.251998	0.882264	0.83184	0.0545148	0.147157	0.42882	0.439767	0.992153	0.85274	-0.242283	0.0676819	0.31855	-0.197483
639	I3LCH7	14.5304	14.0963	14.2026	14.6895	14.208	14.3624	13.8177	13.9115	14.0873	13.8113	13.884	13.611	13.3852	13.8969	14.2041	13.6733	14.1425	14.4771	13.8686	14.0842	13.3712	13.9849	13.866	13.7072	I3LCH7	GALNT5	I3LCH7_PIG	Polypeptide N-acetylgalactosaminyltransferase	0.00297915	0.02582	-0.494367	0.0390511	0.32584	-0.385004	0.00174758	0.01588	-0.534491	0.865173	0.81194	0.109363	0.995068	0.85274	0.0401237	0.735794	0.86169	-0.149487
640	A0A286ZQ00	14.1556	12.0048	13.4344	13.3705	13.7155	13.4968	13.3507	13.1903	12.67	12.59	13.2981	13.154	13.7443	14.0249	14.1031	14.0293	14.8159	14.1541	14.1056	14.2775	13.7762	14.7139	14.3827	14.2017	A0A286ZQ00	LOC100515857	A0A286ZQ00_PIG	C-C motif chemokine	0.552564	0.85373	-0.32078	0.00753277	0.10131	0.782316	0.00251423	0.02137	0.879989	3.81369e-05	0.00038	1.1031	7.06612e-06	0.00018	-1.20077	0.976489	0.86169	0.0976732
641	F2Z5K2	15.0004	14.5172	14.1826	14.2258	13.8666	14.2735	13.4264	15.488	14.6674	14.1804	14.5539	13.7875	15.2091	14.4272	14.0384	14.7443	13.7609	14.4844	13.6173	14.1085	14.0708	14.2684	14.3241	14.2243	F2Z5K2	PSMA5	F2Z5K2_PIG	Proteasome endopeptidase complex	0.999995	0.85373	0.00624547	0.988616	0.92338	0.0996834	0.747455	0.83184	-0.242109	0.990901	0.81194	0.0934379	0.733965	0.85274	0.248355	0.532558	0.86169	-0.341793
642	B6ECP2	14.1354	13.8619	14.3545	14.6025	14.2737	14.1814	13.7934	14.8903	15.1055	14.3928	13.8443	13.9894	13.5176	13.4907	14.0895	14.3813	14.9759	13.6101	13.6735	14.3673	12.9637	14.3595	14.6956	14.4945	B6ECP2	GP1BA	B6ECP2_PIG	Glycoprotein Ib platelet subunit alpha	0.976371	0.85373	0.101031	0.678483	0.92338	-0.224052	0.687959	0.83184	-0.142547	0.42624	0.81194	-0.325083	0.454735	0.82391	0.243578	0.999998	0.86169	0.0815048
643	A0A287BD23;A0A5G2RAY2	13.8415	13.767	14.9021	12.9207	13.5769	14.6828	14.0874	13.4973	14.8849	13.7331	14.0041	13.4095	14.4158	12.7447	14.6855	13.0049	14.4584	13.3906	15.0951	14.8627	14.3834	15.2451	14.384	14.7012	A0A287BD23;A0A5G2RAY2	POFUT2	A0A287BD23_PIG;A0A5G2RAY2_PIG	Uncharacterized protein	0.999977	0.85373	-0.0124675	0.85797	0.92338	-0.165146	0.164966	0.51221	0.830105	0.875583	0.81194	-0.152679	0.15205	0.43756	-0.842573	0.0194299	0.12651	0.995252
644	A0A287AJC5;A0A287APG4;A0A287AWH3	14.3586	15.2741	13.3104	14.6779	13.3043	14.3883	14.1175	11.5843	14.4874	14.6725	13.4818	15.7243	13.521	16.0343	13.6705	15.2547	14.4993	14.2308	13.6113	14.9335	14.2039	15.0974	12.8955	14.2228	A0A287AJC5;A0A287APG4;A0A287AWH3	NA	A0A287AJC5_PIG;A0A287APG4_PIG;A0A287AWH3_PIG	Uncharacterized protein;Ig-like domain-containing protein;Ig-like domain-containing protein	0.996314	0.85373	-0.207642	0.895181	0.92338	0.316166	0.913414	0.83184	-0.0582127	0.966338	0.81194	0.523808	0.850194	0.85274	-0.149429	0.527991	0.86169	-0.374379
645	A0A287B4J2;A0A5G2Q7X1;F1S4Y7;Q710C4	14.967	13.4665	14.2071	14.066	14.272	13.7837	14.7155	14.6765	14.0944	14.5994	14.6487	14.1312	15.3257	15.0048	15.1564	16.3245	12.5134	15.0559	14.4004	13.3979	13.9824	14.5273	13.366	14.1191	A0A287B4J2;A0A5G2Q7X1;F1S4Y7;Q710C4	AHCY	A0A287B4J2_PIG;A0A5G2Q7X1_PIG;F1S4Y7_PIG;SAHH_PIG	Adenosylhomocysteinase	0.799174	0.85373	0.350588	0.16074	0.73282	0.769744	0.99597	0.83184	-0.161536	0.644013	0.81194	0.419156	0.684658	0.85274	0.512124	0.0964517	0.39775	-0.93128
646	A0A5G2QU06;A0A5G2QZA5;F1RWK7	14.3178	14.2076	14.0316	14.0238	14.0861	13.7059	14.1053	13.7503	14.0054	14.2226	14.2188	14.2696	13.8832	14.1687	14.1988	13.3694	13.8004	13.9118	13.9526	13.8839	14.0551	13.686	13.7749	14.2553	A0A5G2QU06;A0A5G2QZA5;F1RWK7	PLXDC1	A0A5G2QU06_PIG;A0A5G2QZA5_PIG;F1RWK7_PIG	Plexin domain containing 1	0.992208	0.85373	0.0331798	0.561982	0.92338	-0.173425	0.881453	0.83184	-0.12755	0.389616	0.77354	-0.206605	0.742545	0.85274	0.16073	0.947826	0.86169	0.0458745
647	F6QA08	14.3265	14.1801	14.0143	13.7649	13.5935	14.1626	14.0277	14.4558	14.5127	14.2698	14.8822	14.1423	14.1527	14.0471	12.9501	14.5236	13.9698	13.969	13.6798	13.9078	14.0999	14.0734	13.6983	14.1125	F6QA08	PDIA3	F6QA08_PIG	Protein disulfide-isomerase	0.165224	0.55376	0.374771	0.962006	0.92338	-0.0716181	0.930386	0.83184	-0.0783614	0.0547433	0.20032	-0.446389	0.0452872	0.20902	0.453133	0.999167	0.86169	-0.00674335
648	A0A5G2QNL8;F1SE53;Q2HWD6	15.1054	13.6553	14.433	14.5122	13.5079	14.3778	13.9328	14.2524	14.6172	13.488	13.0926	13.876	12.819	14.7785	14.5187	13.4924	14.8765	13.37	12.9948	13.7851	13.7877	13.3176	14.3281	14.2594	A0A5G2QNL8;F1SE53;Q2HWD6	KIT	A0A5G2QNL8_PIG;F1SE53_PIG;KIT_PIG	Mast/stem cell growth factor receptor;Mast/stem cell growth factor receptor;Mast/stem cell growth factor receptor Kit	0.655947	0.85373	-0.38875	0.797405	0.92338	-0.28942	0.369438	0.83024	-0.519808	0.99567	0.81194	0.0993293	0.959632	0.85274	0.131059	0.88088	0.86169	-0.230388
649	F1S1A7	14.1477	14.3745	13.7714	13.6333	12.7602	14.7192	14.302	13.7572	14.9077	14.3255	14.9423	14.8979	13.2632	14.1291	14.1027	13.3879	13.7989	14.2455	13.5239	14.0577	13.9745	13.7333	13.2133	13.7382	F1S1A7	ADAMTS4	F1S1A7_PIG	ADAM metallopeptidase with thrombospondin type 1 motif 4	0.0743703	0.31701	0.621052	0.983035	0.92338	-0.0798173	0.831114	0.83184	-0.194232	0.0295842	0.12881	-0.700869	0.00769353	0.06401	0.815284	0.958846	0.86169	-0.114415
650	A0A5G2REN1	15.3041	14.6772	16.3579	15.6779	14.7733	15.7995	16.7624	16.7262	14.5063	17.5513	15.8945	16.7163	14.524	15.1128	15.8648	15.3703	13.5482	14.3063	15.8969	16.0703	16.3663	15.0201	15.1086	15.9701	A0A5G2REN1	CRP	A0A5G2REN1_PIG	Pentaxin	0.141173	0.51325	0.927835	0.351479	0.92338	-0.643931	0.832809	0.83184	0.307077	0.00101485	0.00684	-1.57177	0.633281	0.85274	0.620758	0.061484	0.29746	0.951008
651	A0A286ZYG3;A0A5G2QW61;A0A5G2R8G6;I3LSV8	14.958	14.4125	12.5689	13.694	13.8324	13.6846	13.9532	14.0907	13.742	14.4015	13.9368	14.4795	11.3552	13.9631	13.8334	12.7653	13.9144	14.247	11.1607	14.6766	13.6304	13.2694	13.4243	14.0459	A0A286ZYG3;A0A5G2QW61;A0A5G2R8G6;I3LSV8	BOC	A0A286ZYG3_PIG;A0A5G2QW61_PIG;A0A5G2R8G6_PIG;I3LSV8_PIG	BOC cell adhesion associated, oncogene regulated;BOC cell adhesion associated, oncogene regulated;BOC cell adhesion associated, oncogene regulated;BOC cell adhesion associated, oncogene regulated	0.95793	0.85373	0.242199	0.759926	0.92338	-0.512028	0.835332	0.83184	-0.49053	0.448051	0.81194	-0.754227	0.544049	0.85274	0.732729	0.999354	0.86169	0.0214983
652	A0A287AS68;A0A5G2QR79;Q29042	13.9922	13.3268	14.8247	14.143	14.0597	14.1448	18.4202	14.6073	14.4819	16.8782	16.825	15.0022	13.1459	14.1489	13.2111	13.2262	16.291	12.8827	13.6343	14.2883	14.3266	14.6016	14.0492	13.3967	A0A287AS68;A0A5G2QR79;Q29042	FCN1	A0A287AS68_PIG;A0A5G2QR79_PIG;FCN1_PIG	Ficolin-1	0.00253257	0.02287	1.95394	0.936713	0.92338	-0.264239	0.992545	0.83184	-0.0324134	0.000281438	0.00223	-2.21818	0.00125805	0.01563	1.98636	0.990552	0.86169	0.231826
653	A0A287AEV6	13.4024	14.158	14.0411	13.6056	14.1612	13.5503	14.5525	14.3903	13.8272	13.7832	13.952	13.5834	13.4911	13.8739	15.3204	14.0426	14.1262	14.0059	14.4424	14.204	13.712	13.9794	13.8872	14.1197	A0A287AEV6	NA	A0A287AEV6_PIG	Uncharacterized protein	0.99947	0.85373	0.194983	0.204047	0.83416	0.32357	0.107428	0.39233	0.237688	0.28693	0.6614	0.128588	0.197534	0.52411	-0.0427051	0.97704	0.86169	-0.0858825
654	A0A286ZWQ1;F1S405	14.7152	14.155	13.3868	13.6721	13.7054	13.8637	14.1416	14.1893	14.2672	13.252	14.8572	13.6947	14.0523	14.2359	13.6925	13.2322	13.8502	13.9958	14.0114	13.6623	13.9152	13.2378	13.5433	13.7833	A0A286ZWQ1;F1S405	LTBP1	A0A286ZWQ1_PIG;F1S405_PIG	Latent transforming growth factor beta binding protein 1	0.888252	0.85373	0.150633	0.999445	0.92338	-0.0732358	0.935972	0.83184	-0.224144	0.839122	0.81194	-0.223869	0.571044	0.85274	0.374777	0.962395	0.86169	-0.150908
655	I3LC14	13.4035	14.7577	13.656	13.7398	14.6863	14.1263	14.4489	14.465	13.6149	15.7354	14.1754	13.7985	13.502	13.2795	14.5947	13.4597	15.4943	14.3764	13.0896	14.0237	14.1353	15.2083	13.6399	13.3533	I3LC14	ADAMTSL2	I3LC14_PIG	ADAMTS like 2	0.849909	0.85373	0.311403	0.999956	0.92338	0.0561679	0.940443	0.83184	-0.153266	0.875225	0.81194	-0.255235	0.526658	0.85274	0.464668	0.920643	0.86169	-0.209434
656	A0A287A042	13.4791	12.9295	14.9525	13.6634	12.8457	13.0291	13.6444	13.8945	14.6973	13.1511	13.7257	14.4386	14.4385	14.7197	14.7208	14.5485	14.6058	13.0361	14.0667	13.8814	13.4558	13.5291	14.8634	13.5723	A0A287A042	MGAM	A0A287A042_PIG	Maltase-glucoamylase	0.524335	0.85373	0.442056	0.0667238	0.45239	0.861674	0.810196	0.83184	0.411573	0.684497	0.81194	0.419618	0.973555	0.85274	0.030483	0.409322	0.86169	-0.450101
657	A0A286ZKG9	15.119	13.4422	14.2094	13.7723	15.8433	14.1935	15.9715	15.1225	13.8457	14.387	15.1549	13.8032	14.7634	14.4647	15.2036	14.5936	13.706	14.861	13.9066	13.9307	15.5852	14.9115	14.1124	14.5908	A0A286ZKG9	PPIB	A0A286ZKG9_PIG	Peptidyl-prolyl cis-trans isomerase	0.99002	0.85373	0.284144	0.927831	0.92338	0.168754	0.51323	0.83184	0.0762105	0.991778	0.81194	-0.11539	0.754855	0.85274	0.207933	0.849611	0.86169	-0.0925432
658	A0A5G2RH47;A0A5G2RLJ6;F1RU52;I3LGH6	14.4399	14.9064	13.3276	14.036	14.6661	14.5795	13.48	14.3863	15.2017	15.2111	13.205	14.4144	14.2444	12.7311	14.0981	14.7995	13.7581	14.5996	14.0253	10.7158	12.8251	13.7159	14.5401	12.1525	A0A5G2RH47;A0A5G2RLJ6;F1RU52;I3LGH6	DPP3	A0A5G2RH47_PIG;A0A5G2RLJ6_PIG;F1RU52_PIG;I3LGH6_PIG	Dipeptidyl peptidase 3	0.999997	0.85373	-0.0094849	0.950953	0.92338	-0.287445	0.0568722	0.24382	-1.33012	0.955683	0.81194	-0.277961	0.0594824	0.24746	1.32064	0.171714	0.61195	-1.04268
659	F1SAM3	13.1853	14.0862	12.8151	13.9635	13.8647	15.1878	13.8749	14.2486	14.0338	14.012	14.3548	18.9462	13.5337	16.83	13.7428	12.9436	13.6518	13.7872	13.5706	14.0025	13.2108	13.8426	13.4639	13.1971	F1SAM3	CDH2	F1SAM3_PIG	Cadherin 2	0.181217	0.58234	1.06129	0.922184	0.92338	0.231095	0.988581	0.83184	-0.302505	0.509723	0.81194	-0.830196	0.128684	0.39528	1.36379	0.779522	0.86169	-0.533599
660	F1RFZ5	14.7877	13.9793	12.8154	0	13.4994	13.6676	13.9343	13.8491	13.753	13.4821	13.6753	14.263	14.1939	14.4753	13.4769	13.2374	13.387	14.295	14.0103	14.0781	14.2289	13.7446	0	14.3989	F1RFZ5	GNPTG	F1RFZ5_PIG	N-acetylglucosamine-1-phosphate transferase subunit gamma	0.652225	0.85373	2.36791	0.534496	0.92338	2.38599	0.959745	0.83184	0.285253	0.997419	0.81194	0.0180787	0.9234	0.85274	2.08266	0.837472	0.86169	-2.10073
661	A0A287AU89;I3L7J4	13.9885	13.8926	12.6961	14.1139	14.1323	13.8991	15.1822	14.6264	13.923	12.8238	15.3006	14.5871	14.8457	12.5202	13.6933	15.2968	13.688	15.4264	13.2507	13.9873	13.5829	13.7325	14.7433	12.675	A0A287AU89;I3L7J4	PCDH1	A0A287AU89_PIG;I3L7J4_PIG	Protocadherin 1	0.508775	0.85373	0.620098	0.703555	0.92338	0.458006	0.998819	0.83184	-0.125105	0.990907	0.81194	-0.162091	0.442582	0.81667	0.745203	0.607897	0.86169	-0.583111
662	A0A287BFX0;A0A480DUX8;A0A5G2RBN6	15.0526	14.6081	13.6856	11.968	13.0988	13.071	16.5953	16.1602	13.8061	13.2707	17.2064	13.9523	13.4706	11.2945	14.6233	14.027	12.8429	15.0523	10.1059	13.1933	14.8575	16.3496	13.5672	12.457	A0A287BFX0;A0A480DUX8;A0A5G2RBN6	TWSG1	A0A287BFX0_PIG;A0A480DUX8_PIG;A0A5G2RBN6_PIG	Twisted gastrulation BMP signaling modulator 1	0.25846	0.71305	1.58448	0.999873	0.92338	-0.0289183	0.997105	0.83184	-0.158931	0.233236	0.57499	-1.6134	0.203375	0.52902	1.74341	0.99911	0.86169	-0.130013
663	F1SJM0	14.1609	14.4653	14.0478	14.4633	13.9927	13.7478	14.9583	15.771	16.5278	15.9933	16.6237	14.2572	14.2854	13.9883	14.3539	13.7298	14.1325	14.1343	14.1754	14.7769	14.4975	14.074	13.5726	13.4823	F1SJM0	PTX3	F1SJM0_PIG	Pentraxin-3	1.06048e-07	0	1.54224	0.982307	0.92338	-0.0422809	0.929935	0.83184	-0.0498453	8.49201e-09	0	-1.58452	7.5482e-09	0	1.59208	0.994635	0.86169	-0.00756442
664	A0A286ZSR6;A0A286ZU24;A0A287A0Q2;A0A287ACL1;F1RJF7	14.7863	13.4333	13.9982	13.4555	14.0269	13.3122	14.7205	14.3964	13.9928	14.5648	14.5537	14.3311	12.4409	13.713	13.3439	13.0939	13.7416	13.9092	13.5503	13.0771	14.6697	13.6939	13.5253	14.3668	A0A286ZSR6;A0A286ZU24;A0A287A0Q2;A0A287ACL1;F1RJF7	SDF4	A0A286ZSR6_PIG;A0A286ZU24_PIG;A0A287A0Q2_PIG;A0A287ACL1_PIG;F1RJF7_PIG	Stromal cell derived factor 4;Stromal cell derived factor 4;Stromal cell derived factor 4;45 kDa calcium-binding protein isoform 2;Stromal cell derived factor 4	0.0185206	0.1135	0.591129	0.0899532	0.53835	-0.461673	0.832323	0.83184	-0.0215592	2.74822e-06	4e-05	-1.0528	0.25525	0.60262	0.612688	0.00939932	0.07333	0.440114
665	A0A287B5Y0;F1RTF8;K7GN66;K7GRZ4	14.5277	13.8082	13.9513	14.0065	14.2215	13.4956	13.743	14.1875	13.8584	13.6604	13.9878	13.9101	13.1631	13.8953	13.8956	12.9045	13.3216	14.0076	13.4008	14.0182	13.7724	14.0249	13.3835	12.8878	A0A287B5Y0;F1RTF8;K7GN66;K7GRZ4	IGSF1	A0A287B5Y0_PIG;F1RTF8_PIG;K7GN66_PIG;K7GRZ4_PIG	Immunoglobulin superfamily member 1	0.848963	0.85373	-0.110612	0.0520131	0.39401	-0.470518	0.393097	0.83184	-0.420525	0.330208	0.70537	-0.359907	0.881194	0.85274	0.309914	0.810009	0.86169	0.0499932
666	A0A286ZVE7;K7GK75;P10668	13.5904	14.253	13.3898	14.0383	14.2218	13.8654	14.0027	15.2771	14.9182	14.3787	15.2347	13.0256	14.2796	14.3129	14.4224	16.5429	14.0865	14.8176	13.5552	13.7808	13.6709	14.0912	13.9006	13.7207	A0A286ZVE7;K7GK75;P10668	CFL1	A0A286ZVE7_PIG;K7GK75_PIG;COF1_PIG	Cofilin-1	0.323714	0.82174	0.579714	0.0869316	0.52385	0.850535	0.948193	0.83184	-0.106528	0.910477	0.81194	0.270821	0.125606	0.39266	0.686243	0.0189351	0.12423	-0.957063
667	A0A287ANS6;A0A287B0L6;A0A287B959;A0A287BFK0;A0A480JJE7;A0A5G2QJ24;A0A5G2QMX0;A0A5G2QQP3;A0A5G2R318;A0A5G2R9I5;A0A5G2RBH4;A0A5G2RFB8;A0A5G2RMV0;B1PEY3;F1RPL1;F2Z587;F2Z5L2;F2Z5L5;F2Z5L6	14.071	13.3789	13.5664	13.2592	13.8156	12.019	13.9353	14.3799	15.5567	14.1328	16.7973	16.3132	13.9163	13.4357	13.6827	17.9046	11.0323	13.5294	12.3205	13.4965	16.1288	13.5943	12.54	13.985	A0A287ANS6;A0A287B0L6;A0A287B959;A0A287BFK0;A0A480JJE7;A0A5G2QJ24;A0A5G2QMX0;A0A5G2QQP3;A0A5G2R318;A0A5G2R9I5;A0A5G2RBH4;A0A5G2RFB8;A0A5G2RMV0;B1PEY3;F1RPL1;F2Z587;F2Z5L2;F2Z5L5;F2Z5L6	H2AFJ;HIST1H2AH;HIST1H2AC;HIST3H2A;HIST1H2AC;H2AFV;H2AFX;;H2AFV;H2AFV;H2AFV;;HIST1H2AA;H2A.Z;LOC100154071;LOC100158121;LOC102159655;HIST2H2AC;HIST2H2AB	A0A287ANS6_PIG;A0A287B0L6_PIG;A0A287B959_PIG;A0A287BFK0_PIG;A0A480JJE7_PIG;A0A5G2QJ24_PIG;A0A5G2QMX0_PIG;A0A5G2QQP3_PIG;A0A5G2R318_PIG;A0A5G2R9I5_PIG;A0A5G2RBH4_PIG;A0A5G2RFB8_PIG;A0A5G2RMV0_PIG;B1PEY3_PIG;F1RPL1_PIG;F2Z587_PIG;F2Z5L2_PIG;F2Z5L5_PIG;F2Z5L6_PIG	Histone H2A	0.0829211	0.34205	1.83417	0.917565	0.92338	0.565158	0.994448	0.83184	0.325833	0.319574	0.69135	-1.26901	0.170861	0.47541	1.50834	0.980262	0.86169	-0.239326
668	A0A287BRD6	13.1878	11.5581	13.3666	13.5606	13.141	12.9406	14.8542	13.1318	13.0601	12.6821	12.5357	11.8978	13.1675	13.9826	14.0624	13.5902	14.5389	14.3938	13.8087	13.7236	13.6586	14.0857	13.777	13.6953	A0A287BRD6	CCL16	A0A287BRD6_PIG	C-C motif chemokine	0.999351	0.85373	0.0678272	0.0215793	0.22251	0.996753	0.0706795	0.28545	0.832357	0.0328019	0.139	0.928925	0.102237	0.35252	-0.76453	0.985165	0.86169	-0.164396
669	F6Q2A5;Q0MVN8;Q19QT8	15.7339	15.4278	14.0339	14.0621	14.4735	14.5244	14.806	14.1318	14.5161	12.6107	12.1106	14.3683	15.0463	12.2697	12.6717	12.7093	14.0347	14.5478	14.7612	11.3906	14.4819	14.0713	14.471	11.0667	F6Q2A5;Q0MVN8;Q19QT8	CRYZ	F6Q2A5_PIG;QOR_PIG;Q19QT8_PIG	Quinone oxidoreductase	0.373996	0.85373	-0.952013	0.325308	0.92338	-1.1627	0.326314	0.77082	-1.33551	0.999626	0.81194	-0.210684	0.999096	0.85274	0.383501	0.99998	0.86169	-0.172817
670	A0A287ALS5;A0A287AW54;A0A5G2R1A1;F1SH32	14.6508	14.4042	13.8101	13.4772	13.6083	13.166	14.15	14.4018	14.0801	13.6105	13.9693	14.0521	13.8095	13.85	14.1614	13.5328	14.1689	14.0061	13.7496	13.9458	14.0553	14.2026	13.6914	13.7906	A0A287ALS5;A0A287AW54;A0A5G2R1A1;F1SH32	GOLIM4	A0A287ALS5_PIG;A0A287AW54_PIG;A0A5G2R1A1_PIG;F1SH32_PIG	Golgi integral membrane protein 4	0.667532	0.85373	0.191191	0.905856	0.92338	0.0686478	0.836257	0.83184	0.0530994	0.969751	0.81194	-0.122543	0.99368	0.85274	0.138091	0.997898	0.86169	-0.0155484
671	A0A286ZNE4	13.1788	14.1358	13.7693	14.3861	13.8519	13.9342	14.0655	13.972	13.8527	13.6918	14.4217	13.8386	13.5335	13.6205	13.99	13.7793	14.1442	13.8361	13.4612	13.4992	13.3378	13.9792	13.6963	13.2506	A0A286ZNE4	SUSD5	A0A286ZNE4_PIG	Sushi domain containing 5	0.916835	0.85373	0.09773	0.947556	0.92338	-0.0587212	0.0621691	0.25934	-0.338617	0.634712	0.81194	-0.156451	0.00999347	0.07664	0.436347	0.188826	0.64379	-0.279896
672	A0A286ZS77;A0A5G2QGZ8;A0A5G2QW86;A0A5G2RDX9;A0A5K1V4A5	13.6705	14.3671	13.9509	14.3081	14.0033	13.8035	13.9524	13.8351	13.562	13.1679	13.7004	13.7566	13.8029	14.0191	13.8161	13.6676	14.2529	13.4831	13.9921	13.6685	13.1886	14.1088	12.885	13.9204	A0A286ZS77;A0A5G2QGZ8;A0A5G2QW86;A0A5G2RDX9;A0A5K1V4A5	BSG	A0A286ZS77_PIG;A0A5G2QGZ8_PIG;A0A5G2QW86_PIG;A0A5G2RDX9_PIG;A0A5K1V4A5_PIG	Ig-like domain-containing protein	0.184299	0.587	-0.354822	0.821385	0.92338	-0.176941	0.203588	0.58089	-0.390011	0.67047	0.81194	0.177881	1	0.85274	0.0351895	0.664241	0.86169	-0.213071
673	A0A5G2QPJ7	16.8796	13.9369	13.8211	14.3865	13.9037	13.9195	14.6762	14.1558	14.2457	14.3792	14.6521	14.4162	13.961	13.9562	14.0108	14.1844	14.0357	14.1067	14.0676	13.6792	14.2423	14.1035	13.7767	13.7148	A0A5G2QPJ7	FAH	A0A5G2QPJ7_PIG	Fumarylacetoacetase	0.994912	0.85373	-0.0536573	0.475572	0.92338	-0.432071	0.316779	0.77082	-0.543834	0.360978	0.73091	-0.378414	0.270879	0.62257	0.490177	0.985257	0.86169	-0.111763
674	F1REZ1;P10859	13.3722	19.0715	19.3133	15.3452	12.8041	12.7443	19.4986	15.3352	16.5934	12.478	16.8907	14.3422	13.6446	19.1751	17.3081	12.1432	12.665	13.5916	12.3163	19.2249	14.3807	12.7007	12.6411	12.6215	F1REZ1;P10859	HAPLN1	F1REZ1_PIG;HPLN1_PIG	Hyaluronan and proteoglycan link protein 1	0.991762	0.85373	0.414576	0.974227	0.92338	-0.687151	0.810863	0.83184	-1.46088	0.893288	0.81194	-1.10173	0.647924	0.85274	1.87545	0.962577	0.86169	-0.773727
675	P79335	9.36285	12.6122	12.451	11.3525	12.1795	12.1874	16.3302	15.9962	17.1157	15.3376	17.0555	14.7699	11.0802	16.3619	12.5494	17.1126	12.6113	11.9103	14.2975	16.1539	13.5816	16.0712	16.29	15.0725	P79335	SERPINE1	PAI1_PIG	Plasminogen activator inhibitor 1	3.80794e-07	1e-05	4.40996	0.114548	0.61085	1.91337	0.000262044	0.00342	3.55355	0.0105029	0.05459	-2.49659	0.649909	0.85274	0.856411	0.226716	0.73175	1.64018
676	K7GRE3	14.1786	14.1222	13.8999	13.8731	13.6244	13.5678	13.8726	13.6822	13.5027	13.5523	14.3587	13.3167	14.0558	13.8504	13.8419	13.7266	13.1016	14.0957	13.9829	13.2916	13.852	14.0771	13.3922	13.9283	K7GRE3	CHRDL1	K7GRE3_PIG	Chordin like 1	0.772645	0.85373	-0.163459	0.968414	0.92338	-0.0989973	0.965906	0.83184	-0.123636	0.960181	0.81194	0.0644614	0.967507	0.85274	-0.0398231	0.999995	0.86169	-0.0246383
677	F1SB42	14.9596	12.8446	12.5504	13.1742	13.9037	14.1754	12.5193	14.6467	13.9171	12.972	13.8649	13.1594	14.3006	13.8421	14.3401	13.6939	14.2605	14.1011	14.1434	14.905	13.3938	13.5767	13.7283	14.2923	F1SB42	EZR	F1SB42_PIG	Ezrin	0.994516	0.85373	-0.0880672	0.481015	0.92338	0.488419	0.614139	0.83184	0.405277	0.335731	0.7079	0.576486	0.460505	0.83049	-0.493345	0.997912	0.86169	-0.083141
678	F1SJZ1	14.9424	14.6326	14.4917	14.356	14.2612	14.781	14.8279	14.8672	15.1554	15.2899	14.9203	15.0569	13.785	14.2156	14.0469	13.9392	14.0068	14.2454	14.0098	13.9119	14.3311	14.4529	14.0256	14.2275	F1SJZ1	STC2	F1SJZ1_PIG	Stanniocalcin-2	0.00029752	0.00365	0.442103	5.20024e-06	0.0003	-0.537672	0.00150959	0.01418	-0.4177	0	0	-0.979776	1.08691e-13	0	0.859803	0.694174	0.86169	0.119972
679	A0A287AT18	15.037	14.4665	13.6236	14.1403	13.4876	14.3183	13.6048	15.4268	14.6612	13.9825	14.3544	13.9691	15.0743	14.4061	13.8167	14.7958	13.9174	14.3186	13.6282	13.9586	14.3423	13.7126	14.1661	14.1844	A0A287AT18	PSMA7	A0A287AT18_PIG	Proteasome subunit alpha type	0.898988	0.85373	0.154209	0.862444	0.92338	0.209225	0.879574	0.83184	-0.180216	0.99977	0.81194	0.0550159	0.507759	0.85274	0.334425	0.416445	0.86169	-0.389441
680	A0A5G2QG83;O19071	15.5752	14.7379	15.104	12.9824	11.9457	12.8038	15.4251	14.5487	12.4566	15.2264	11.6694	16.4932	11.5823	12.3811	15.4438	11.2794	12.2086	15.5252	15.6443	15.6491	14.0401	14.7432	12.5203	14.9583	A0A5G2QG83;O19071	MGAT2	A0A5G2QG83_PIG;MGAT2_PIG	Alpha-1,6-mannosyl-glycoprotein 2-beta-N-acetylglucosaminyltransferase;Alpha-1,6-mannosyl-glycoprotein 2-beta-N-acetylglucosaminyltransferase	0.940742	0.85373	0.445054	0.891902	0.92338	-0.788124	0.450006	0.83184	0.73436	0.575932	0.81194	-1.23318	0.790886	0.85274	-0.289306	0.115931	0.46187	1.52248
681	F1RQD2	14.5165	14.0199	14.5828	13.0162	12.3772	13.3887	13.763	13.7904	14.4132	14.3142	13.8778	13.7796	12.4376	13.0398	13.6763	13.284	13.2839	14.6982	13.8539	13.9789	14.4753	14.4868	13.8342	13.5584	F1RQD2	TIMD4	F1RQD2_PIG	T cell immunoglobulin and mucin domain containing 4	0.731938	0.85373	0.339448	0.882893	0.92338	-0.24693	0.667421	0.83184	0.381005	0.294446	0.66819	-0.586379	0.999072	0.85274	-0.0415563	0.22899	0.73175	0.627935
682	A0A287AYJ5;A0A5G2QMH2;A0A5G2QWZ8;A0A5G2R419;F1RN32;K7GQB9	13.7594	14.17	14.1401	13.8902	13.9395	13.959	13.8151	14.2194	14.261	13.8241	13.8814	13.8023	13.481	14.2364	14.0751	15.4246	14.4636	14.5179	13.2325	13.6582	13.5295	14.0711	13.624	13.2837	A0A287AYJ5;A0A5G2QMH2;A0A5G2QWZ8;A0A5G2R419;F1RN32;K7GQB9	GAS6	A0A287AYJ5_PIG;A0A5G2QMH2_PIG;A0A5G2QWZ8_PIG;A0A5G2R419_PIG;F1RN32_PIG;K7GQB9_PIG	Uncharacterized protein	0.999964	0.85373	-0.00915633	0.232877	0.88713	0.39007	0.137365	0.44684	-0.409885	0.213543	0.54115	0.399227	0.151138	0.43756	0.400728	0.000236909	0.0036	-0.799955
683	F1RUL6;P30034	11.6603	12.7464	14.9662	11.9131	13.7148	14.3387	13.5877	13.1867	14.6848	14.5995	13.8656	11.4819	12.2934	12.8594	14.5773	18.1264	13.1825	12.0653	13.1905	14.682	13.3571	12.0208	12.7765	12.7497	F1RUL6;P30034	PPBP;PF4	F1RUL6_PIG;PLF4_PIG	C-X-C motif chemokine;Platelet factor 4	0.963284	0.85373	0.344458	0.941144	0.92338	0.627484	0.891917	0.83184	-0.0937989	0.999719	0.81194	0.283027	0.63981	0.85274	0.438257	0.563223	0.86169	-0.721283
684	A0A5G2QXY7;Q2VTP6	14.1378	12.2184	13.7467	14.3888	14.6175	13.8708	13.4116	15.4763	14.5432	13.8391	14.3492	14.476	13.8879	12.9082	13.7324	15.4609	14.6809	14.5886	13.7569	14.4124	14.3418	14.2759	12.6162	13.1616	A0A5G2QXY7;Q2VTP6	FKBP1A	A0A5G2QXY7_PIG;Q2VTP6_PIG	Peptidylprolyl isomerase	0.597417	0.85373	0.519236	0.846147	0.92338	0.379812	0.987603	0.83184	-0.0691759	0.975337	0.81194	-0.139425	0.414839	0.7932	0.588412	0.654992	0.86169	-0.448988
685	P82460	13.8767	13.9058	13.2288	13.6781	13.4896	13.498	14.136	14.369	13.8128	13.9319	14.0906	13.2271	14.2317	14.101	14	15.5215	14.4916	14.2049	13.9939	13.8598	13.3249	13.5288	13.5451	14.1106	P82460	TXN	THIO_PIG	Thioredoxin	0.433572	0.85373	0.315077	0.000597651	0.0129	0.81227	0.943496	0.83184	0.114376	0.0822248	0.27275	0.497193	0.805433	0.85274	0.200701	0.00536165	0.04637	-0.697894
686	A0A5G2QZC6;A0A5G2RGI4	13.5738	14.3536	13.1633	14.18	13.8148	14.2018	13.8072	14.9988	14.5163	14.0383	14.4989	12.0606	14.4062	14.396	14.4645	15.8859	14.589	14.7111	13.4756	13.838	12.3589	13.4582	13	13.8769	A0A5G2QZC6;A0A5G2RGI4	UBE2NL	A0A5G2QZC6_PIG;A0A5G2RGI4_PIG	Ubiquitin conjugating enzyme E2 N like (gene/pseudogene)	0.991252	0.85373	0.105494	0.107029	0.59226	0.860912	0.331538	0.78075	-0.546604	0.198664	0.51792	0.755418	0.199718	0.52601	0.652098	0.000400023	0.00517	-1.40752
687	A0A287AWI4;A0A287B2T2;A0A287BEF3	13.4921	13.8977	12.6341	13.1493	13.2365	14.085	14.3475	13.8945	14.2155	13.5985	13.2563	13.1898	13.5696	14.2792	13.4507	13.9912	14.4323	13.5343	13.8803	13.8299	10.3319	14.2107	13.8906	13.6488	A0A287AWI4;A0A287B2T2;A0A287BEF3	PTPRJ	A0A287AWI4_PIG;A0A287B2T2_PIG;A0A287BEF3_PIG	Protein tyrosine phosphatase receptor type J	0.785086	0.85373	0.33455	0.495469	0.92338	0.46041	0.979683	0.83184	-0.1171	0.972933	0.81194	0.125861	0.61946	0.85274	0.451649	0.290288	0.82694	-0.57751
688	Q03472	12.6598	13.7187	13.5683	12.6348	14.4428	13.1644	10.6497	14.2843	12.5797	12.6152	13.9306	12.6627	14.579	13.8706	14.1	14.0229	14.1172	13.4211	9.19054	12.3573	12.522	13.6616	13.0698	13.5761	Q03472	APOR	APOR_PIG	Apolipoprotein R	0.722396	0.85373	-0.577734	0.781704	0.92338	0.653676	0.137273	0.44684	-0.968577	0.195408	0.51271	1.23141	0.666439	0.85274	0.390843	0.0090822	0.0715	-1.62225
689	A0A286ZZX3	12.9786	13.4074	14.0154	14.9259	12.6314	12.8761	14.8686	14.767	14.7309	14.2281	12.725	10.3844	13.2958	14.5302	14.4506	14.8308	12.8257	14.2622	15.2223	14.0997	13.2581	13.2039	13.1753	14.1837	A0A286ZZX3	TIMP3	A0A286ZZX3_PIG	Metalloproteinase inhibitor 3	0.995033	0.85373	0.144873	0.794239	0.92338	0.560085	0.929664	0.83184	0.3847	0.904736	0.81194	0.415212	0.982251	0.85274	-0.239826	0.99082	0.86169	-0.175386
690	P34930	13.9764	14.417	13.3967	13.6575	13.6354	14.4789	13.5936	15.6171	14.0065	13.7269	14.7671	13.0715	14.3252	14.4263	14.1452	14.4945	13.3068	14.2995	14.2432	13.6605	13.8009	13.0448	13.314	13.5171	P34930	HSPA1A	HS71A_PIG	Heat shock 70 kDa protein 1A	0.910096	0.85373	0.203459	0.80501	0.92338	0.239272	0.851743	0.83184	-0.330235	0.995168	0.81194	0.0358134	0.467589	0.83484	0.533694	0.310845	0.85491	-0.569507
691	A0A286ZYN1;A0A287BKE8;A0A5G2QKC3	13.3156	13.7079	13.5721	14.2921	13.8419	13.8482	13.7164	13.869	13.8036	13.9296	13.4786	13.3012	12.9129	13.2816	14.111	13.7942	13.7339	13.8626	13.904	14.431	13.0154	13.6762	13.956	13.6517	A0A286ZYN1;A0A287BKE8;A0A5G2QKC3	H6PD	A0A286ZYN1_PIG;A0A287BKE8_PIG;A0A5G2QKC3_PIG	Hexose-6-phosphate dehydrogenase/glucose 1-dehydrogenase;GDH/6PGL endoplasmic bifunctional protein isoform 1;Hexose-6-phosphate dehydrogenase/glucose 1-dehydrogenase	0.776691	0.85373	-0.0799076	0.819834	0.92338	-0.146949	0.999104	0.83184	0.00941781	0.999617	0.81194	-0.0670415	0.7576	0.85274	-0.0893254	0.758511	0.86169	0.156367
692	A0A5G2QEJ2	14.6187	14.8251	12.963	12.682	13.5992	13.3654	13.813	13.8252	14.8339	13.5022	15.3836	14.0595	13.8537	13.8978	13.1995	13.5687	12.9265	14.7759	14.1402	12.6735	13.8594	14.1892	12.0313	14.1406	A0A5G2QEJ2	NA	A0A5G2QEJ2_PIG	Collagen IV NC1 domain-containing protein	0.48239	0.85373	0.560631	0.989895	0.92338	0.028131	0.99997	0.83184	-0.169848	0.684689	0.81194	-0.5325	0.537637	0.85274	0.730479	0.993619	0.86169	-0.197979
693	K7GLE5;P81245;Q8WMH1	13.9151	14.6469	14.8299	13.8722	15.3093	11.7432	13.8065	13.7054	13.1411	13.7167	13.2082	13.1097	12.2338	13.0944	14.0293	13.644	14.2549	14.1519	13.6363	13.308	11.9501	13.2463	11.741	12.7511	K7GLE5;P81245;Q8WMH1	LOC100626157;;OBP	K7GLE5_PIG;OBP_PIG;Q8WMH1_PIG	Lipocln_cytosolic_FA-bd_dom domain-containing protein;Odorant-binding protein;Odorant binding protein	0.143785	0.52054	-0.604833	0.743001	0.92338	-0.484727	0.107467	0.39233	-1.28065	0.669857	0.81194	0.120107	0.998259	0.85274	0.675815	0.549367	0.86169	-0.795922
694	A0A5G2Q7C7;A0A5G2QFD9;A0A5G2RGB0;A0A5G2RHC2;I3LB89;K7GRR0;Q28832	13.9442	12.4773	12.3161	13.8868	19.6993	13.3125	10.7895	13.9251	13.8945	13.6733	13.9904	20.2596	13.9881	14.0465	12.8679	12.0363	13.396	14.1212	13.4451	13.7657	13.1984	14.0504	13.3793	20.28	A0A5G2Q7C7;A0A5G2QFD9;A0A5G2RGB0;A0A5G2RHC2;I3LB89;K7GRR0;Q28832	LDLR	A0A5G2Q7C7_PIG;A0A5G2QFD9_PIG;A0A5G2RGB0_PIG;A0A5G2RHC2_PIG;I3LB89_PIG;K7GRR0_PIG;LDLR_PIG	Low-density lipoprotein receptor;Low-density lipoprotein receptor;Low-density lipoprotein receptor;Low-density lipoprotein receptor;Low-density lipoprotein receptor;Low-density lipoprotein receptor;Low-density lipoprotein receptor (Fragment)	0.999464	0.85373	0.149345	0.951576	0.92338	-0.863369	0.945839	0.83184	0.413799	0.9175	0.81194	-1.01271	0.971201	0.85274	-0.264454	0.6916	0.86169	1.27717
695	F1SMC0	13.8781	14.3473	13.17	12.5737	12.5808	14.2371	13.9918	14.5038	14.3318	13.908	13.9931	12.9677	13.8758	11.1679	13.8414	15.0118	13.9031	13.574	13.817	12.0056	13.2906	14.4144	13.7549	13.3647	F1SMC0	CAP1	F1SMC0_PIG	Adenylyl cyclase-associated protein	0.71825	0.85373	0.484881	0.99986	0.92338	0.0978106	0.988911	0.83184	-0.0232746	0.765861	0.81194	-0.38707	0.53858	0.85274	0.508155	0.978604	0.86169	-0.121085
696	A0A286ZPY9;A0A286ZXR9;A0A5G2QAE1;A0A5G2QG21;A0A5G2QPW1;A0A5G2REK8;A0A5K1VDV6;B5APU9	13.5122	13.7151	12.9178	14.3265	13.4501	14.6706	13.6275	16.6824	15.7112	14.7542	15.6486	13.3338	13.6483	12.6826	14.6905	15.1154	13.4095	14.2501	13.7779	14.0762	14.2304	14.005	14.2336	14.1097	A0A286ZPY9;A0A286ZXR9;A0A5G2QAE1;A0A5G2QG21;A0A5G2QPW1;A0A5G2REK8;A0A5K1VDV6;B5APU9	ARPC4	A0A286ZPY9_PIG;A0A286ZXR9_PIG;A0A5G2QAE1_PIG;A0A5G2QG21_PIG;A0A5G2QPW1_PIG;A0A5G2REK8_PIG;A0A5K1VDV6_PIG;B5APU9_PIG	Actin-related protein 2/3 complex subunit 4;Actin related protein 2/3 complex subunit 4;Actin-related protein 2/3 complex subunit 4;Actin-related protein 2/3 complex subunit 4;Actin-related protein 2/3 complex subunit 4;Actin related protein 2/3 complex subunit 4;Actin related protein 2/3 complex subunit 4;Actin-related protein 2/3 complex subunit 4	0.023252	0.13759	1.19422	0.995478	0.92338	0.200679	0.995182	0.83184	0.306745	0.047726	0.18284	-0.99354	0.0572643	0.24247	0.887474	1	0.86169	0.106066
697	F1SC70	13.5243	16.7188	16.874	16.8089	12.3851	16.9318	13.0705	13.7685	13.964	13.7008	16.6188	13.2634	12.7962	13.6412	16.5927	16.8869	13.456	13.3705	16.9592	13.8822	13.9937	16.3697	14.0498	13.6553	F1SC70	CTSA	F1SC70_PIG	Carboxypeptidase	0.278893	0.74644	-1.47617	0.420346	0.92338	-1.08322	0.568748	0.83184	-0.722168	0.994796	0.81194	0.392946	0.971061	0.85274	-0.754	0.996851	0.86169	0.361054
698	F1SG31	13.2282	13.2345	13.6547	13.1143	13.8038	13.6359	14.5185	14.0403	13.7958	12.9907	14.1754	13.9734	13.4098	13.6636	13.9182	11.7956	12.1635	13.2031	13.9757	13.4215	12.9752	14.243	11.8945	13.0544	F1SG31	NA	F1SG31_PIG	Lipocln_cytosolic_FA-bd_dom domain-containing protein	0.485608	0.85373	0.470457	0.725476	0.92338	-0.419573	0.999442	0.83184	-0.184522	0.0680374	0.23625	-0.89003	0.441072	0.81641	0.654979	0.793098	0.86169	0.235051
699	F2Z4Y1	13.9567	13.8195	15.353	13.4144	15.0979	13.3377	13.7966	15.5641	14.2788	13.8182	14.518	13.4715	13.3874	13.441	13.3399	14.2989	13.461	13.8027	12.9049	13.7318	13.4469	13.777	13.8274	13.9055	F2Z4Y1	YWHAH	F2Z4Y1_PIG	Tyrosine 3-monooxygenase/tryptophan 5-monooxygenase activation protein eta	0.999429	0.85373	0.0780017	0.280207	0.92338	-0.54139	0.481311	0.83184	-0.564302	0.36047	0.73091	-0.619392	0.596624	0.85274	0.642304	0.991362	0.86169	-0.0229121
700	Q2TNK5	15.6749	12.1344	15.6905	13.2127	12.5213	12.4084	15.3293	13.5944	14.0692	13.5309	14.4538	12.9304	13.1148	13.8302	12.8585	13.2555	13.4871	13.6384	13.1412	13.1821	13.6442	13.9823	15.7228	12.7982	Q2TNK5	ANGPTL4	ANGL4_PIG	Angiopoietin-related protein 4	0.926048	0.85373	0.377664	0.962176	0.92338	-0.242931	0.991345	0.83184	0.138121	0.692485	0.81194	-0.620595	0.990625	0.85274	0.239543	0.864164	0.86169	0.381052
701	A0A286ZTV6;A0A287AQV8;A0A287BGG1;F1SFL4	14.1329	13.0202	13.6203	12.7301	13.6011	12.9925	14.0459	13.3754	13.3595	13.7646	13.5538	13.883	13.7714	13.8308	13.7266	13.6078	14.0933	13.868	13.632	13.5709	12.515	13.2944	13.5617	13.6253	A0A286ZTV6;A0A287AQV8;A0A287BGG1;F1SFL4	SUMF1	A0A286ZTV6_PIG;A0A287AQV8_PIG;A0A287BGG1_PIG;F1SFL4_PIG	Sulfatase modifying factor 1	0.329061	0.83039	0.314202	0.0324358	0.2951	0.466816	0.948422	0.83184	0.0170624	0.721926	0.81194	0.152614	0.69279	0.85274	0.29714	0.132564	0.50351	-0.449753
702	A0A286ZQZ7;A0A5G2QWI8;Q9GLG4	13.2449	13.7545	14.6199	14.6172	14.4099	14.7644	14.631	15.3116	13.048	14.6788	14.2774	14.4148	13.997	13.7108	13.6557	13.7866	14.1882	14.2803	13.8408	13.6922	13.1569	14.3533	13.0927	12.7618	A0A286ZQZ7;A0A5G2QWI8;Q9GLG4	CHGB	A0A286ZQZ7_PIG;A0A5G2QWI8_PIG;SCG1_PIG	Secretogranin-1	0.991245	0.85373	0.158441	0.768618	0.92338	-0.298708	0.121543	0.42515	-0.7522	0.600497	0.81194	-0.457149	0.0792725	0.29975	0.910641	0.561193	0.86169	-0.453491
703	A0A480K168;F8S329	14.6386	14.6611	14.172	14.8134	14.5564	14.6002	14.7179	15.2309	15.4756	15.3037	15.3105	15.0319	13.4297	13.8877	14.0684	13.711	12.9846	13.9507	13.8216	14.1064	14.521	14.7596	14.0903	14.0925	A0A480K168;F8S329	NA	A0A480K168_PIG;F8S329_PIG	Endogenous retrovirus group S71 member 1 Env polyprotein-like;Env protein	0.00143057	0.01411	0.604786	2.01036e-07	2e-05	-0.90157	0.143283	0.45719	-0.341697	0	0	-1.50636	3.89839e-08	0	0.946483	0.00540785	0.04637	0.559872
704	A0A5G2QTK7;A0A5G2R7J8;F2Z5N0	14.5715	14.3246	13.724	13.4289	14.0186	13.5845	13.7951	15.552	14.3673	14.1328	14.6752	13.5468	14.8592	14.3656	14.1767	14.6369	13.7619	14.2708	13.7737	14.1576	13.9532	13.6877	12.9086	13.5315	A0A5G2QTK7;A0A5G2R7J8;F2Z5N0	PSMA6	A0A5G2QTK7_PIG;A0A5G2R7J8_PIG;F2Z5N0_PIG	Proteasome subunit alpha type	0.419851	0.85373	0.402831	0.356266	0.92338	0.403157	0.868688	0.83184	-0.273294	0.999342	0.81194	0.00032601	0.109915	0.3594	0.676125	0.0720133	0.33529	-0.676451
705	F1RL04	13.2631	13.9951	11.5203	12.8981	13.9098	15.5501	13.9531	14.4628	12.2204	13.0724	14.5068	12.3731	14.0697	13.6507	14.4841	12.5757	13.7573	13.0355	14.4313	14.4761	13.0769	12.366	14.5093	12.5783	F1RL04	PPM1F	F1RL04_PIG	Protein phosphatase, Mg2+/Mn2+ dependent 1F	0.998312	0.85373	-0.0913509	0.996344	0.92338	0.0727258	0.99411	0.83184	0.0502153	0.98064	0.81194	0.164077	0.97524	0.85274	-0.141566	0.999969	0.86169	-0.0225105
706	I3LPM2	13.9702	13.4876	12.7066	13.1795	13.756	14.4094	13.8886	13.9306	12.7334	12.7726	13.4201	14.2321	12.8402	14.3994	13.6398	12.6812	10.9794	12.2765	13.7638	13.9495	14.1692	13.2346	13.4844	12.8705	I3LPM2	SEL1L3	I3LPM2_PIG	SEL1L family member 3	0.995071	0.85373	-0.0886687	0.261494	0.92338	-0.78214	0.948985	0.83184	-0.00622122	0.386772	0.76977	-0.693471	0.865937	0.85274	-0.0824475	0.0811956	0.35895	0.775919
707	P62895	12.48	13.1393	13.9005	14.0962	14.0219	13.4151	14.9936	15.3522	14.1153	13.791	14.1918	13.0785	13.0371	12.0465	13.3532	13.2563	14.0729	13.2378	14.2542	14.2268	13.5853	13.1946	14.658	13.1721	P62895	CYCS	CYC_PIG	Cytochrome c	0.343243	0.84385	0.744907	0.678756	0.92338	-0.341531	0.583926	0.83184	0.339654	0.0321138	0.13792	-1.08644	0.98741	0.85274	0.405253	0.0815312	0.35895	0.681185
708	I3LKF3	15.3519	15.8965	11.6954	14.1941	12.3598	14.2514	11.9047	15.0313	14.4501	13.0408	14.8394	14.0092	14.298	13.9251	15.1302	14.2065	13.5146	14.015	14.9419	12.9962	11.8955	11.4356	12.7434	14.8475	I3LKF3	FSCN1	I3LKF3_PIG	Fascin	0.999959	0.85373	-0.0789218	0.966682	0.92338	0.223394	0.720435	0.83184	-0.814839	0.956603	0.81194	0.302315	0.757463	0.85274	0.735917	0.416725	0.86169	-1.03823
709	A0A5S6GT88;P04574	12.9804	14.0268	13.6729	14.2332	13.8664	14.2379	13.8353	15.1227	14.4566	13.9006	13.791	13.5761	13.3855	13.7464	14.1383	14.2482	14.1501	14.1103	14.0065	14.1189	13.292	13.5869	13.3674	13.2144	A0A5S6GT88;P04574	CAPNS1	A0A5S6GT88_PIG;CPNS1_PIG	Calpain small subunit 1	0.645553	0.85373	0.27745	0.955045	0.92338	0.126863	0.747793	0.83184	-0.2386	0.917632	0.81194	-0.150587	0.141303	0.42427	0.516049	0.411526	0.86169	-0.365463
710	A0A287B7Y2	13.6252	13.6719	13.8833	13.8452	13.7675	13.6326	12.4983	12.9526	13.9867	13.2801	12.9743	13.7589	13.4188	13.8646	13.6345	13.5398	14.2063	13.599	14.0448	13.6031	13.2715	13.6582	13.5926	13.5118	A0A287B7Y2	TMEM132C	A0A287B7Y2_PIG	Transmembrane protein 132C	0.0412835	0.21084	-0.495804	0.998518	0.92338	-0.0271243	0.708252	0.83184	-0.123955	0.066022	0.23222	0.468679	0.480925	0.84458	-0.371849	0.786922	0.86169	-0.0968308
711	A0A286ZN14;A0A286ZXH8;I3LK80	11.0363	18.3543	15.2835	14.1032	12.3064	12.3493	14.147	13.4382	15.5611	14.2778	15.4755	13.6324	13.066	14.5209	14.0948	13.9054	17.6286	11.7901	13.464	14.1641	13.8185	14.6962	14.9854	14.3333	A0A286ZN14;A0A286ZXH8;I3LK80	ELANE	A0A286ZN14_PIG;A0A286ZXH8_PIG;I3LK80_PIG	Elastase, neutrophil expressed;Elastase, neutrophil expressed;Elastase, neutrophil expressed	0.934906	0.85373	0.516491	0.999396	0.92338	0.262117	0.999993	0.83184	0.338066	0.966273	0.81194	-0.254374	0.94758	0.85274	0.178425	0.99972	0.86169	0.0759488
712	A0A287AKH1;I3LLG6	14.5343	13.876	13.3256	13.8597	12.9896	14.3363	14.763	13.2337	14.2518	13.3449	13.6397	14.7104	14.7362	14.2457	12.404	12.8433	14.0796	13.8791	11.975	14.0673	14.4945	14.1742	14.073	14.245	A0A287AKH1;I3LLG6	MXRA8	A0A287AKH1_PIG;I3LLG6_PIG	Matrix remodeling associated 8	0.742161	0.85373	0.170335	0.981778	0.92338	-0.122248	0.963511	0.83184	0.0179221	0.518465	0.81194	-0.292584	0.519043	0.85274	0.152413	0.99934	0.86169	0.14017
713	A0A287AHS0;A0A287AUG4;A0A5G2Q7N5;A0A5G2QWK6;F2Z5G3	14.0791	13.1634	13.4187	13.1792	13.5975	15.4135	13.9083	13.8161	13.9588	13.5789	14.202	14.3687	13.7236	14.3657	12.9941	14.2178	13.1926	13.3179	12.7473	12.5982	14.1037	12.8888	14.9273	15.1546	A0A287AHS0;A0A287AUG4;A0A5G2Q7N5;A0A5G2QWK6;F2Z5G3	CALM3;CALM1;CALM3;CALM3;STPG4	A0A287AHS0_PIG;A0A287AUG4_PIG;A0A5G2Q7N5_PIG;A0A5G2QWK6_PIG;F2Z5G3_PIG	Calmodulin	0.97825	0.85373	0.163579	0.959504	0.92338	-0.173271	0.988515	0.83184	-0.0718842	0.807161	0.81194	-0.33685	0.893272	0.85274	0.235464	0.998282	0.86169	0.101387
714	A0A287A461	12.6866	13.2906	13.5967	13.864	13.9755	13.584	13.5789	14.3901	13.8816	14.2827	14.0261	12.6119	14.1102	12.0327	13.7389	13.3331	13.3014	14.287	13.2492	12.8947	13.5808	13.5018	13.1151	12.7627	A0A287A461	CHAD	A0A287A461_PIG	Chondroadherin	0.99073	0.85373	0.29563	0.983296	0.92338	-0.0323461	0.757067	0.83184	-0.315511	0.916052	0.81194	-0.327976	0.640906	0.85274	0.611141	0.915146	0.86169	-0.283165
715	A0A287A3Y9;A0A287BMP7;A0A5S6GLX4;P50578	15.5487	13.6868	13.3241	13.6484	13.3547	13.6444	13.6506	14.7935	13.3267	13.5984	14.5419	13.8543	13.3681	13.0851	13.6758	15.0722	14.2961	14.4215	13.8214	14.0689	14.269	13.6499	13.9136	13.4046	A0A287A3Y9;A0A287BMP7;A0A5S6GLX4;P50578	AKR1A1	A0A287A3Y9_PIG;A0A287BMP7_PIG;A0A5S6GLX4_PIG;AK1A1_PIG	Aldo-keto reductase family 1 member A1	0.992743	0.85373	0.0930638	0.972806	0.92338	0.118621	0.999238	0.83184	-0.013278	0.998536	0.81194	0.025557	0.999069	0.85274	0.106342	0.990512	0.86169	-0.131899
716	A0A5G2QMD8;F1SN67	13.9354	14.1546	13.4031	14.1157	13.6061	14.026	14.0467	13.6593	13.6816	13.6361	13.892	13.4891	13.1114	13.4963	13.4071	13.5098	13.9446	13.9465	13.3497	13.479	13.3239	13.7866	13.4138	13.5747	A0A5G2QMD8;F1SN67	FBN1	A0A5G2QMD8_PIG;F1SN67_PIG	Fibrillin-1	0.733032	0.85373	-0.139374	0.131519	0.65267	-0.30421	0.0400127	0.18384	-0.385532	0.65798	0.81194	-0.164836	0.349745	0.72374	0.246158	0.949318	0.86169	-0.0813219
717	F1RVL7	13.4438	12.6564	13.7516	13.3641	12.7743	12.7082	13.9049	14.4712	14.5003	14.08	14.6015	13.4516	13.4805	12.7345	13.6525	15.0312	12.5942	12.5655	13.2485	13.8269	14.2185	14.2647	13.6894	13.5447	F1RVL7	TREML1	F1RVL7_PIG	Triggering receptor expressed on myeloid cells like 1	0.000839308	0.00912	1.05184	0.968269	0.92338	0.22666	0.324569	0.77082	0.682389	0.00478936	0.02792	-0.825177	0.188313	0.51233	0.369448	0.574956	0.86169	0.455729
718	A0A287BS42;F1RQ01	13.7135	12.2148	13.0819	14.325	13.8447	13.7694	13.3241	15.3371	15.6643	14.2003	14.9162	12.7122	12.0477	11.532	13.6573	16.1502	13.8566	14.2771	13.0439	14.036	13.9721	14.1264	13.68	13.8355	A0A287BS42;F1RQ01	FERMT3	A0A287BS42_PIG;F1RQ01_PIG	Fermitin family member 3	0.354606	0.84811	0.867456	0.9997	0.92338	0.0952389	1	0.83184	0.290728	0.311129	0.67883	-0.772217	0.382908	0.76595	0.576728	0.999702	0.86169	0.195489
719	A0A287AG70;Q8MJ14	13.6001	14.4058	14.1503	13.7171	14.3022	13.8084	14.1028	15.3191	14.6462	14.7889	14.3913	13.5831	14.5204	13.475	14.822	16.1031	13.8918	15.4645	13.7054	13.1126	12.4576	13.6145	13.4888	13.6794	A0A287AG70;Q8MJ14	GPX1	A0A287AG70_PIG;GPX1_PIG	Glutathione peroxidase;Glutathione peroxidase 1	0.796862	0.85373	0.474582	0.0605773	0.43243	0.715485	0.286217	0.72289	-0.654268	0.438476	0.81194	0.240903	0.0672276	0.2707	1.12885	0.000145299	0.00247	-1.36975
720	A0A5G2QPH0;A0A5G2QZP2;A0A5G2RA03;I3LVM3;K7GLN6;K7GS37;K7GSG7	14.5904	13.6215	11.9261	13.4022	10.5155	13.6788	12.9691	13.7614	12.7933	13.8759	13.8922	13.646	14.2022	14.262	13.8474	13.8611	13.4831	12.1828	14.5952	12.428	14.2035	14.2622	14.286	12.8744	A0A5G2QPH0;A0A5G2QZP2;A0A5G2RA03;I3LVM3;K7GLN6;K7GS37;K7GSG7	CD300LG	A0A5G2QPH0_PIG;A0A5G2QZP2_PIG;A0A5G2RA03_PIG;I3LVM3_PIG;K7GLN6_PIG;K7GS37_PIG;K7GSG7_PIG	Ig-like domain-containing protein;IG domain-containing protein;IG domain-containing protein;Ig-like domain-containing protein;Ig-like domain-containing protein;Ig-like domain-containing protein;Ig-like domain-containing protein	0.297996	0.77714	0.533916	0.467196	0.92338	0.684029	0.631391	0.83184	0.819141	0.987687	0.81194	0.150112	0.963693	0.85274	-0.285225	0.997357	0.86169	0.135112
721	A0A5K1UGB8;P20735	13.7216	13.6371	12.1665	13.6291	12.4315	13.2784	12.6872	12.7889	13.6859	16.3845	12.93	14.0555	13.408	13.3161	12.8091	13.9483	13.6379	12.6952	13.5262	13.0842	13.764	13.1384	13.8547	13.4697	A0A5K1UGB8;P20735	GGT1	A0A5K1UGB8_PIG;GGT1_PIG	Glutathione hydrolase 1 proenzyme	0.474891	0.85373	0.611293	0.995957	0.92338	0.158399	0.966033	0.83184	0.328821	0.625558	0.81194	-0.452893	0.790589	0.85274	0.282472	0.99428	0.86169	0.170422
722	A0A5G2Q9S0;Q2EN76	14.0902	13.5955	12.6629	13.7947	13.1304	13.9833	12.1992	14.9655	13.8703	13.7641	13.6032	12.6859	15.4436	13.8018	14.1019	15.051	13.9034	14.7366	12.8667	12.9024	13.166	13.2717	12.8469	13.5038	A0A5G2Q9S0;Q2EN76	NME2	A0A5G2Q9S0_PIG;NDKB_PIG	Nucleoside diphosphate kinase;Nucleoside diphosphate kinase B	0.999805	0.85373	-0.0281249	0.0391531	0.32584	0.963559	0.446687	0.83184	-0.449934	0.0307011	0.13255	0.991684	0.495703	0.85274	0.421809	0.000151928	0.00253	-1.41349
723	A0A5G2QPN7;F1RPC1	14.5626	12.7549	13.6213	13.2476	13.6154	12.7353	13.8584	13.4785	12.5931	13.857	13.0167	13.4906	12.7317	13.3092	13.2244	12.9703	12.4877	13.5426	13.0883	12.6223	11.5432	13.8393	12.9414	13.3815	A0A5G2QPN7;F1RPC1	PIK3IP1	A0A5G2QPN7_PIG;F1RPC1_PIG	Phosphoinositide-3-kinase interacting protein 1	0.999102	0.85373	-0.0404545	0.740146	0.92338	-0.378535	0.618531	0.83184	-0.520194	0.814784	0.81194	-0.33808	0.701048	0.85274	0.47974	0.995947	0.86169	-0.141659
724	A0A287AGJ3	15.3603	12.4082	13.7857	12.5155	14.049	13.9757	13.8291	15.5	13.5444	13.7602	15.7207	13.6542	12.8906	13.2005	14.4764	13.2707	13.4573	14.0281	13.4791	14.4334	14.2424	13.5086	13.5269	13.1555	A0A287AGJ3	BCAT2	A0A287AGJ3_PIG	Branched-chain-amino-acid aminotransferase, mitochondrial	0.540666	0.85373	0.652365	0.981139	0.92338	-0.128466	0.883612	0.83184	0.0419138	0.327592	0.70161	-0.780831	0.951991	0.85274	0.610451	0.678132	0.86169	0.17038
725	K7GP14;P31936	14.1994	13.8989	13.5664	13.9574	13.3385	13.4115	15.0621	15.8574	16.248	14.7197	16.4897	14.2016	13.7778	13.9859	12.9055	12.3871	12.8464	13.8453	13.6178	13.8677	14.5366	13.5648	14.1554	13.667	K7GP14;P31936	IBSP	K7GP14_PIG;SIAL_PIG	Bone sialoprotein 2	7.19601e-07	2e-05	1.7011	0.543889	0.92338	-0.437357	0.953212	0.83184	0.172885	1.95452e-10	0	-2.13846	3.03793e-05	0.00062	1.52821	0.24258	0.74495	0.610242
726	A0A286ZX29	11.808	13.32	15.2283	14.8074	14.4716	13.8012	13.6259	10.1321	14.4911	11.2789	14.2048	13.1345	9.93644	12.7796	14.1787	13.2583	12.2491	11.5081	14.0786	11.8212	14.1297	12.3128	13.5997	13.2043	A0A286ZX29	SERPINB12	A0A286ZX29_PIG	Serpin family B member 12	0.410813	0.85373	-1.09485	0.0841294	0.52048	-1.58769	0.592984	0.83184	-0.715022	0.839924	0.81194	-0.492843	0.994897	0.85274	-0.379823	0.701548	0.86169	0.872666
727	A0A286ZUJ1;A0A480QHS7	12.7457	13.1919	13.7278	13.9359	13.2	13.9275	14.3094	16.2183	14.8011	14.144	15.4303	13.7098	13.2168	12.7192	13.4123	14.2009	13.2629	13.6222	13.6377	14.2081	14.0895	14.252	14.4183	13.8176	A0A286ZUJ1;A0A480QHS7	CORO1A	A0A286ZUJ1_PIG;A0A480QHS7_PIG	Coronin	3.36053e-05	0.00055	1.31399	0.977018	0.92338	-0.0491123	0.393028	0.83184	0.615716	5.38836e-06	7e-05	-1.3631	0.0268233	0.15123	0.69827	0.180422	0.63002	0.664828
728	A0A287BS38;F1RQ47	12.0712	13.1611	15.3208	13.8838	15.1314	14.1907	15.4759	13.2461	13.2298	14.8117	12.9467	14.4696	14.2909	12.7331	14.7282	13.2037	14.6927	13.0154	12.8105	12.4192	14.6933	14.4969	13.6255	13.8612	A0A287BS38;F1RQ47	IDS	A0A287BS38_PIG;F1RQ47_PIG	Sulfatase domain-containing protein	0.999098	0.85373	0.0701233	0.948673	0.92338	-0.182515	0.775911	0.83184	-0.308729	0.905739	0.81194	-0.252638	0.698504	0.85274	0.378852	0.972695	0.86169	-0.126214
729	A0A287AK21;A0A287BK36;F1RJ93	13.5391	13.1282	12.0027	13.1716	13.0441	13.1691	13.6272	15.0475	14.3894	13.7534	14.6497	13.393	13.7544	13.4187	13.1969	15.4553	13.3703	13.7959	12.8806	13.789	14.0103	14.0107	13.9688	13.0913	A0A287AK21;A0A287BK36;F1RJ93	TAGLN2	A0A287AK21_PIG;A0A287BK36_PIG;F1RJ93_PIG	Transgelin	0.00371431	0.03124	1.13423	0.0852138	0.5237	0.82277	0.3652	0.82739	0.615993	0.744621	0.81194	-0.311462	0.341577	0.71521	0.518238	0.898111	0.86169	-0.206777
730	P0DSN9	11.7964	11.1898	14.9497	18.7985	13.6345	19.16	15.0592	15.9687	14.6235	14.7169	14.6154	14.9274	11.9135	15.0545	14.6859	14.8912	13.6807	13.6733	16.3076	16.2847	17.2067	16.4283	17.8571	17.4759	P0DSN9	SAA4	SAA4_PIG	Serum amyloid A-4 protein	0.999876	0.85373	0.0637072	0.581074	0.92338	-0.938288	0.346305	0.80197	2.00523	0.536556	0.81194	-1.002	0.384314	0.76595	-1.94152	0.0160658	0.1087	2.94352
731	A0A5G2R0I5	14.0183	13.1812	14.5162	13.543	13.4349	13.1091	13.8433	13.0358	13.3176	12.4832	13.9134	13.5722	13.0572	10.5695	13.4582	12.7597	13.4398	13.597	13.6493	13.0494	15.0197	12.8694	12.8121	14.347	A0A5G2R0I5	LTBP4	A0A5G2R0I5_PIG	Latent transforming growth factor beta binding protein 4	0.919278	0.85373	-0.27288	0.185589	0.79003	-0.820222	0.996415	0.83184	-0.00929518	0.5169	0.81194	-0.547342	0.977861	0.85274	-0.263584	0.28072	0.81556	0.810926
732	A0A5G2QTE4;F1SB50	13.3715	13.2972	13.7941	13.8466	13.9057	13.7103	13.2136	14.7391	13.018	13.0262	14.0443	11.8076	13.1017	13.342	13.9902	12.7112	13.6737	13.3683	13.4574	13.5925	13.0798	12.8268	13.0651	12.7821	A0A5G2QTE4;F1SB50	RELN	A0A5G2QTE4_PIG;F1SB50_PIG	Reelin	0.318521	0.81824	-0.34612	0.689037	0.92338	-0.289725	0.532583	0.83184	-0.520302	0.92422	0.81194	0.0563947	0.990663	0.85274	0.174183	0.990597	0.86169	-0.230578
733	F1SQ01	13.0902	13.5266	13.8775	12.8794	13.3943	13.806	13.6426	14.8594	14.0807	13.9158	14.2595	12.691	13.8447	13.8891	14.095	15.2573	13.694	14.247	14.7935	13.86	13.6258	13.2276	13.3769	13.1652	F1SQ01	PRDX4	F1SQ01_PIG	Peroxiredoxin	0.403471	0.85373	0.479164	0.0765376	0.48984	0.742188	0.856507	0.83184	0.245822	0.826052	0.81194	0.263025	0.891762	0.85274	0.233341	0.384827	0.86169	-0.496366
734	A0A5G2REY7;A0A5G2RJ53;F1RLL9	13.9139	13.6315	13.2432	14.1212	13.3551	14.0585	12.3444	13.4232	13.8158	13.1209	13.2707	12.5064	12.468	12.8119	13.3174	13.0329	14.0074	13.9325	12.9885	13.234	12.603	13.6582	13.5143	13.6768	A0A5G2REY7;A0A5G2RJ53;F1RLL9	COL4A2	A0A5G2REY7_PIG;A0A5G2RJ53_PIG;F1RLL9_PIG	Collagen type IV alpha 2 chain	0.0598932	0.27298	-0.640321	0.211026	0.85144	-0.458872	0.192282	0.56281	-0.441437	0.948956	0.81194	0.181449	0.972235	0.85274	-0.198885	0.999697	0.86169	0.0174358
735	I3L9V2	15.193	15.0915	14.3226	13.024	14.3712	14.7146	11.9331	14.7779	13.9971	13.3688	14.0511	12.403	13.287	12.2542	14.1729	11.8715	15.1757	15.3876	13.3852	13.6044	14.2963	13.155	14.1489	13.4609	I3L9V2	VAT1	I3L9V2_PIG	Synaptic vesicle membrane protein VAT-1 homolog	0.219856	0.65834	-1.03096	0.499826	0.92338	-0.761307	0.50569	0.83184	-0.777682	0.957956	0.81194	0.269657	0.965571	0.85274	-0.253283	0.999995	0.86169	-0.0163741
736	A0A287ACE8;A0A287BEL4;F1RQC2	13.9839	13.4232	12.9086	12.8902	13.2906	12.801	13.3922	13.3053	13.6709	12.9884	13.3864	13.3016	12.7973	13.4427	13.1485	12.8138	13.6484	13.2429	12.7504	13.2578	13.2719	13.338	13.5218	13.5182	A0A287ACE8;A0A287BEL4;F1RQC2	GALNT10	A0A287ACE8_PIG;A0A287BEL4_PIG;F1RQC2_PIG	Polypeptide N-acetylgalactosaminyltransferase	0.885004	0.85373	0.124534	0.99997	0.92338	-0.0339884	0.91821	0.83184	0.0600903	0.868854	0.81194	-0.158523	0.9999	0.85274	0.0644441	0.896623	0.86169	0.0940787
737	A0A287B6H1;A0A287B9B9;I3LR80	14.0504	13.2603	13.216	14.0398	12.4044	14.189	13.206	13.4469	14.4114	15.3316	13.1613	14.3058	16.431	14.0536	15.2626	13.9347	13.8651	12.6996	13.5433	13.6662	14.1172	14.0889	14.4979	13.4371	A0A287B6H1;A0A287B9B9;I3LR80	IL1RAP	A0A287B6H1_PIG;A0A287B9B9_PIG;I3LR80_PIG	Interleukin 1 receptor accessory protein	0.684604	0.85373	0.450523	0.303255	0.92338	0.847802	0.995865	0.83184	0.365139	0.918994	0.81194	0.397279	0.832106	0.85274	0.0853837	0.433385	0.86169	-0.482663
738	F1SIC9	14.1937	13.3146	13.5563	14.4175	13.4866	14.2622	13.3915	13.6486	13.7953	13.645	13.6466	13.9357	13.4468	14.0283	13.1827	12.3666	14.0897	13.5612	11.707	13.3388	13.256	13.3637	13.9691	11.3693	F1SIC9	LOXL1	F1SIC9_PIG	Lysyl oxidase homolog	0.941582	0.85373	-0.194681	0.539908	0.92338	-0.42592	0.00909476	0.05849	-1.03783	0.866898	0.81194	-0.231239	0.0478404	0.21466	0.843151	0.239054	0.74201	-0.611912
739	E2I6L6;Q28985	14.1688	10.1975	13.049	13.6507	13.4441	13.5718	14.7219	13.3174	13.9611	13.0683	14.5098	13.5301	15.9659	12.3327	14.0861	14.3145	13.5164	13.8407	13.4503	13.7127	14.2776	13.8318	12.7666	13.8561	E2I6L6;Q28985	IGFBP5	E2I6L6_PIG;IBP5_PIG	Insulin-like growth factor-binding protein 5	0.351849	0.84811	0.837801	0.304305	0.92338	0.99574	0.849534	0.83184	0.635535	0.999609	0.81194	0.157939	0.860678	0.85274	0.202266	0.800656	0.86169	-0.360205
740	A0A287AQK7;A0A287B8J5;O02705	13.9304	13.0459	12.138	13.2615	13.0575	13.6029	12.859	16.509	15.0351	13.6066	15.3985	12.7821	13.5744	13.4347	13.1479	14.8443	13.6879	14.0421	12.7256	13.4533	13.4062	13.2922	13.7234	13.4903	A0A287AQK7;A0A287B8J5;O02705	HSP90AA1	A0A287AQK7_PIG;A0A287B8J5_PIG;HS90A_PIG	Heat shock protein HSP 90-alpha	0.0488565	0.2355	1.19234	0.600654	0.92338	0.615861	0.996605	0.83184	0.175832	0.552629	0.81194	-0.576478	0.101507	0.35219	1.01651	0.735718	0.86169	-0.440029
741	A0A286ZRS0;A0A5G2QUF4;F1S4X9	14.2929	13.5545	13.4419	14.3177	13.2243	14.4747	13.325	14.4793	13.7371	14.0361	14.2746	12.8733	14.1195	13.2011	13.7878	13.4123	13.8374	13.8259	13.4208	13.7289	12.4901	13.1268	13.7855	13.5486	A0A286ZRS0;A0A5G2QUF4;F1S4X9	GSS	A0A286ZRS0_PIG;A0A5G2QUF4_PIG;F1S4X9_PIG	Glutathione synthetase	0.980405	0.85373	-0.0967641	0.783009	0.92338	-0.187004	0.0669916	0.27453	-0.534229	0.944608	0.81194	-0.0902399	0.158589	0.45153	0.437465	0.392872	0.86169	-0.347225
742	A0A287A817;F1S887;I3L932	13.5971	13.7759	13.3382	13.8942	13.9869	13.5273	13.1424	13.6167	13.3933	13.5339	13.5433	11.3713	13.2725	12.9546	13.5389	13.9351	12.9022	13.0648	13.4678	13.7908	13.3512	13.6738	13.5671	13.2658	A0A287A817;F1S887;I3L932	LOC102161654	A0A287A817_PIG;F1S887_PIG;I3L932_PIG	Uncharacterized protein	0.0931454	0.37521	-0.5865	0.278731	0.92338	-0.408595	0.748154	0.83184	-0.167211	0.955836	0.81194	0.177905	0.5966	0.85274	-0.419288	0.871108	0.86169	0.241383
743	A0A287A688;A0A287AW61;A0A5G2QR59;A0A5G2QWM0;A0A5G2RBW0;F1SPM5	10.6345	13.2697	13.942	13.4607	14.3756	13.0833	14.1734	14.0256	0	9.9101	14.1764	11.8988	10.1192	11.493	14.0468	13.9851	9.18342	13.4263	14.4305	13.9028	5.9001	12.638	12.3004	10.8407	A0A287A688;A0A287AW61;A0A5G2QR59;A0A5G2QWM0;A0A5G2RBW0;F1SPM5	ANTXR1	A0A287A688_PIG;A0A287AW61_PIG;A0A5G2QR59_PIG;A0A5G2QWM0_PIG;A0A5G2RBW0_PIG;F1SPM5_PIG	ANTXR cell adhesion molecule 1	0.0664185	0.29075	-2.43024	0.963996	0.92338	-1.08534	0.999827	0.83184	-1.45889	0.19616	0.51304	1.3449	0.101366	0.35219	-0.971346	0.948429	0.86169	-0.373557
744	A0A287A191;A0A287B6Z6;I3LVH8	13.939	13.0974	13.6059	13.2306	12.8316	13.6222	13.601	13.7146	13.3346	13.1932	13.8446	13.7693	13.0159	13.518	12.3368	12.7864	13.3799	13.7652	12.5857	13.2276	13.5763	13.9074	13.3142	13.2206	A0A287A191;A0A287B6Z6;I3LVH8	DSC2	A0A287A191_PIG;A0A287B6Z6_PIG;I3LVH8_PIG	Desmocollin 2	0.826641	0.85373	0.188465	0.692677	0.92338	-0.254061	0.993687	0.83184	-0.0824934	0.20903	0.5347	-0.442526	0.693568	0.85274	0.270958	0.841939	0.86169	0.171567
745	Q2XVP4	12.3503	13.5897	12.8848	12.8063	13.326	13.3606	12.5497	14.4244	12.9018	13.8614	14.602	12.2601	13.6788	13.6527	13.3178	15.9848	12.6757	13.6431	12.5945	13.3767	13.025	13.6681	13.5297	12.6596	Q2XVP4	TUBA1B	TBA1B_PIG	Tubulin alpha-1B chain	0.801819	0.85373	0.380275	0.332496	0.92338	0.772508	0.999871	0.83184	0.0893132	0.861369	0.81194	0.392233	0.778374	0.85274	0.290962	0.294849	0.83718	-0.683195
746	A0A287B4U0;I3LFR7	12.9494	13.4369	13.5496	14.0539	13.332	13.1779	13.1408	13.5406	13.9357	13.9151	13.191	13.5146	13.1484	13.6223	14.0021	13.4057	14.13	13.6611	13.4643	13.3648	12.9294	13.6509	13.7068	12.8284	A0A287B4U0;I3LFR7	DPEP2	A0A287B4U0_PIG;I3LFR7_PIG	Dipeptidase	0.911322	0.85373	0.123012	0.651652	0.92338	0.244975	0.868066	0.83184	-0.0924994	0.958137	0.81194	0.121963	0.492067	0.85274	0.215511	0.207765	0.69171	-0.337475
747	A0A5G2QYC6;A0A5S6GBZ7;A0A5S6H4P7;P35750	13.4154	14.3446	13.2697	14.0586	13.717	13.6666	13.5656	14.9031	14.4947	13.7841	14.0804	13.2635	15.2109	13.6106	13.9426	15.4092	14.0085	13.9774	13.9868	13.8256	13.7726	13.3233	13.4535	13.6698	A0A5G2QYC6;A0A5S6GBZ7;A0A5S6H4P7;P35750	CAPN1	A0A5G2QYC6_PIG;A0A5S6GBZ7_PIG;A0A5S6H4P7_PIG;CAN1_PIG	Calpain-1 catalytic subunit	0.768799	0.85373	0.26991	0.159612	0.73282	0.614551	0.968943	0.83184	-0.073392	0.676054	0.81194	0.344642	0.505694	0.85274	0.343302	0.0535207	0.26637	-0.687943
748	A0A2C9F3F0;P04178	13.7369	13.2085	13.2516	12.3873	14.0255	13.0716	17.9664	17.868	14.1611	12.7816	12.444	14.9249	12.7372	14.7629	13.6255	14.3107	13.5387	13.9237	12.4518	17.9428	14.6784	11.7566	12.545	13.1162	A0A2C9F3F0;P04178	SOD1	A0A2C9F3F0_PIG;SODC_PIG	Superoxide dismutase [Cu-Zn]	0.160804	0.55188	1.7441	0.813339	0.92338	0.536241	0.732082	0.83184	0.468222	0.642046	0.81194	-1.20786	0.759277	0.85274	1.27588	0.998251	0.86169	-0.0680193
749	F1SEB5	14.1337	13.0171	13.1568	13.2591	13.2649	13.7205	13.9629	13.3178	13.8415	13.0184	13.1991	14.1623	13.4455	13.3175	12.8256	12.6742	13.361	13.0856	13.1974	13.0881	13.619	13.0374	13.7765	13.4462	F1SEB5	CNTFR	F1SEB5_PIG	Ciliary neurotrophic factor receptor	0.431273	0.85373	0.158316	0.372275	0.92338	-0.307138	0.946307	0.83184	-0.0645881	0.0121988	0.06171	-0.465455	0.236125	0.57326	0.222905	0.746369	0.86169	0.24255
750	A0A286ZIH0;A0A286ZZF0;A0A287BGS6;F1SAI8	13.4337	14.0319	14.3195	14.3096	13.3625	14.1963	14.0655	13.7101	14.0125	13.2206	13.7006	12.146	11.9475	10.7617	13.4875	12.3798	13.6702	13.1825	13.6998	13.5867	11.803	13.157	13.3396	13.2759	A0A286ZIH0;A0A286ZZF0;A0A287BGS6;F1SAI8	HYOU1	A0A286ZIH0_PIG;A0A286ZZF0_PIG;A0A287BGS6_PIG;F1SAI8_PIG	Hypoxia up-regulated 1	0.114818	0.44779	-0.46635	4.53875e-05	0.00182	-1.37073	0.0857613	0.33503	-0.798597	0.166687	0.46741	-0.904378	0.998665	0.85274	0.332247	0.226909	0.73175	0.572131
751	A0A287BGW4	13.9281	12.4576	13.2842	12.8253	13.0047	11.847	13.7187	13.7579	13.5586	13.5678	13.7143	13.9555	12.9213	14.178	13.7167	15.2399	13.4078	14.0561	13.437	12.4584	13.3398	12.5429	14.2804	13.1922	A0A287BGW4	ALAD	A0A287BGW4_PIG	Delta-aminolevulinic acid dehydratase	0.052837	0.2496	0.820979	0.00485603	0.07364	1.02879	0.580403	0.83184	0.317279	0.853134	0.81194	0.207812	0.62769	0.85274	0.5037	0.177059	0.6233	-0.711512
752	A0A286ZMU5;A0A287BBM1;A0A287BHL0;A0A480Q0J7;A0A5G2Q7Y5;A0A5G2QDP8;A0A5G2QGE1;A0A5G2QU32;A0A5G2QVL8;A0A5G2R625;A0A5G2R731;A0A5G2REH8;F1SFQ4;I3LEC2;I3LRF8	13.6681	13.3807	11.4553	12.9247	13.2786	12.9524	13.3535	14.518	13.9545	12.8914	14.0306	12.8128	13.5175	14.0409	13.8972	15.9353	13.8743	14.3647	13.5716	13.5461	13.6571	13.414	13.7457	13.6753	A0A286ZMU5;A0A287BBM1;A0A287BHL0;A0A480Q0J7;A0A5G2Q7Y5;A0A5G2QDP8;A0A5G2QGE1;A0A5G2QU32;A0A5G2QVL8;A0A5G2R625;A0A5G2R731;A0A5G2REH8;F1SFQ4;I3LEC2;I3LRF8	PCBP3;PCBP3;PCBP2;PCBP2;PCBP3;PCBP2;PCBP2;PCBP2;PCBP2;PCBP2;PCBP3;PCBP2;PCBP2;PCBP1;PCBP3	A0A286ZMU5_PIG;A0A287BBM1_PIG;A0A287BHL0_PIG;A0A480Q0J7_PIG;A0A5G2Q7Y5_PIG;A0A5G2QDP8_PIG;A0A5G2QGE1_PIG;A0A5G2QU32_PIG;A0A5G2QVL8_PIG;A0A5G2R625_PIG;A0A5G2R731_PIG;A0A5G2REH8_PIG;F1SFQ4_PIG;I3LEC2_PIG;I3LRF8_PIG	Uncharacterized protein;Uncharacterized protein;Poly(rC) binding protein 2;Poly(RC)-binding protein 2 isoform a;Uncharacterized protein;Poly(rC) binding protein 2;Poly(rC) binding protein 2;Poly(rC) binding protein 2;Poly(rC) binding protein 2;Poly(rC) binding protein 2;Uncharacterized protein;Poly(rC) binding protein 2;Poly(rC) binding protein 2;Poly(rC) binding protein 1;Uncharacterized protein	0.247848	0.70253	0.65017	0.000551567	0.0128	1.32834	0.173238	0.52096	0.658316	0.176227	0.47805	0.67817	0.994983	0.85274	-0.00814579	0.281337	0.81556	-0.670024
753	F1SE75;P37109	11.8803	13.1288	13.5152	12.128	13.3272	11.3197	14.1109	13.4864	11.5422	13.6511	14.1793	12.9682	13.2695	11.5166	13.7041	13.4577	12.7584	12.7725	13.6865	13.7174	13.1553	13.838	13.3784	11.5507	F1SE75;P37109	SPINK4	F1SE75_PIG;ISK4_PIG	Serine protease inhibitor Kazal-type 4	0.693045	0.85373	0.773117	0.781607	0.92338	0.363259	0.0945139	0.36079	0.671146	0.998106	0.81194	-0.409859	0.658496	0.85274	0.101971	0.470718	0.86169	0.307888
754	A0A287A0F3;A0A287A474;P31346;Q1HDU1	12.6178	12.1488	12.8787	13.5136	12.8848	13.608	12.2767	12.6345	13.5239	10.88	12.8497	12.8798	12.8001	13.5282	13.2378	13.7151	13.947	13.3459	12.7597	13.5205	12.7542	13.6014	14.1808	13.5522	A0A287A0F3;A0A287A474;P31346;Q1HDU1	RNASE4;RNASE4;ANG;ANG1	A0A287A0F3_PIG;A0A287A474_PIG;ANGI_PIG;Q1HDU1_PIG	Ribonuclease 4;Ribonuclease 4;Angiogenin;Angiogenin	0.556117	0.85373	-0.434523	0.510849	0.92338	0.487036	0.74144	0.83184	0.452834	0.037471	0.15075	0.921558	0.109608	0.3594	-0.887356	0.986789	0.86169	-0.034202
755	A0A287A1U5;F1SMZ6	15.8152	16.2862	13.4978	12.6833	13.1494	16.459	14.6918	14.839	13.3033	12.2443	13.2513	16.4577	12.3834	15.0186	13.3131	13.4617	16.4625	16.2117	13.1302	13.4665	16.2019	11.4501	12.1621	12.8903	A0A287A1U5;F1SMZ6	HSPE1	A0A287A1U5_PIG;F1SMZ6_PIG	Uncharacterized protein	0.910315	0.85373	-0.51727	0.999873	0.92338	-0.173314	0.618384	0.83184	-1.43163	0.88497	0.81194	0.343955	0.941323	0.85274	0.914364	0.554821	0.86169	-1.25832
756	A0A287AKS6;F1RYP7	14.1293	13.7935	12.8089	13.3154	13.1831	13.348	13.7172	13.4403	13.7388	12.4921	13.8354	13.9471	12.8089	13.5326	12.9555	13.3028	13.9433	13.3632	13.106	13.2287	13.3741	13.4821	13.6913	12.7956	A0A287AKS6;F1RYP7	SCG3	A0A287AKS6_PIG;F1RYP7_PIG	Secretogranin III	0.764894	0.85373	0.0987592	0.988792	0.92338	-0.111979	0.893553	0.83184	-0.150056	0.578509	0.81194	-0.210738	0.403932	0.78319	0.248815	0.976428	0.86169	-0.0380766
757	A0A480M584;A0A5G2QSS3;F1RF77	13.9393	11.5871	15.0662	10.371	12.8332	14.0897	13.4169	12.3632	14.129	10.2352	13.8335	12.3814	14.412	13.9879	13.4943	14.0782	15.2143	14.0426	13.4264	13.173	12.7559	13.1527	13.7325	14.2737	A0A480M584;A0A5G2QSS3;F1RF77	PLOD1	A0A480M584_PIG;A0A5G2QSS3_PIG;F1RF77_PIG	Procollagen-lysine,2-oxoglutarate 5-dioxygenase 1;Procollagen-lysine,2-oxoglutarate 5-dioxygenase 1;Procollagen-lysine,2-oxoglutarate 5-dioxygenase 1	0.977348	0.85373	-0.254564	0.233255	0.88713	1.22379	0.938034	0.83184	0.437951	0.1001	0.3179	1.47835	0.764251	0.85274	-0.692515	0.566794	0.86169	-0.785837
758	A0A287BMT4	12.0038	14.9779	14.7263	13.4605	13.3236	13.8638	14.1343	12.3507	12.2772	14.4949	13.7724	12.4237	16.5689	12.8725	12.8242	13.4393	13.7484	12.3462	13.4154	13.8232	12.2453	13.5677	14.3646	12.9097	A0A287BMT4	NA	A0A287BMT4_PIG	Ig-like domain-containing protein	0.822001	0.85373	-0.483774	0.981661	0.92338	-0.0927406	0.747499	0.83184	-0.338308	0.96304	0.81194	0.391033	0.998456	0.85274	-0.145466	0.915844	0.86169	-0.245567
759	A0A287AQH8;A0A5G2QN66;A0A5G2RDD7;G9F6X8	12.9272	13.4613	12.9877	13.4081	13.386	13.7729	13.2966	13.9741	13.6359	13.3597	14.1145	12.3907	13.1386	13.3302	12.7298	13.2474	13.4911	13.4796	13.214	13.6089	12.9783	13.4569	13.3302	13.1361	A0A287AQH8;A0A5G2QN66;A0A5G2RDD7;G9F6X8	P4HB	A0A287AQH8_PIG;A0A5G2QN66_PIG;A0A5G2RDD7_PIG;G9F6X8_PIG	Prolyl 4-hydroxylase subunit beta;Protein disulfide-isomerase;Protein disulfide-isomerase;Protein disulfide-isomerase	0.905224	0.85373	0.138033	0.951436	0.92338	-0.0877576	0.981888	0.83184	-0.0364866	0.623803	0.81194	-0.225791	0.729578	0.85274	0.17452	0.998876	0.86169	0.051271
760	A0A5G2QW05;F1SKB1;K7GKN3;K7GMZ8	13.0195	14.0086	12.6397	13.8701	13.6941	15.1904	16.4915	16.0065	16.0736	15.9648	15.3287	15.8153	13.1099	12.4862	13.0769	13.3737	13.1855	12.6665	15.0116	14.8357	16.5415	16.2934	15.2218	14.8745	A0A5G2QW05;F1SKB1;K7GKN3;K7GMZ8	CP	A0A5G2QW05_PIG;F1SKB1_PIG;K7GKN3_PIG;K7GMZ8_PIG	Ceruloplasmin	3.60691e-11	0	2.20969	0.0759704	0.48984	-0.753951	4.51361e-06	9e-05	1.72602	0	0	-2.96364	0.337532	0.71072	0.483666	3.12261e-12	0	2.47997
761	F1S505;K7GS01;Q5XW65	13.2675	13.0509	14.6721	13.4818	15.082	13.7544	15.2067	13.8343	13.3868	12.417	13.5895	12.6816	12.7886	12.5457	13.211	13.0393	13.7102	13.6935	14.5964	13.9376	12.3824	13.0121	11.6417	13.5558	F1S505;K7GS01;Q5XW65	BPIFA1	F1S505_PIG;K7GS01_PIG;BPIA1_PIG	BPI fold-containing family A member 1	0.45431	0.85373	-0.365493	0.380174	0.92338	-0.720086	0.811131	0.83184	-0.697142	0.999756	0.81194	-0.354593	0.956464	0.85274	0.331649	0.916058	0.86169	0.022944
762	I3LQ76	16.7601	11.8107	12.1478	14.2555	12.8602	10.972	12.8608	11.903	14.4453	11.9877	10.9633	10.177	7.32839	16.2437	12.4555	12.3166	11.7918	12.5428	12.0307	16.2844	11.1239	15.2796	11.3427	4.22987	I3LQ76	UPTI	I3LQ76_PIG	BPTI/Kunitz inhibitor domain-containing protein	0.885338	0.85373	-1.07819	0.94314	0.92338	-1.02124	0.900802	0.83184	-1.41915	0.998513	0.81194	0.0569533	0.999998	0.85274	0.340955	0.998932	0.86169	-0.397908
763	F1S232;Q29228	14.8446	14.0378	13.1584	12.6941	13.7408	12.3629	13.5961	15.7201	14.5402	13.2954	14.7936	11.3931	13.8767	13.7235	13.8403	15.4637	13.891	14.5343	13.268	13.2664	12.6906	13.6124	12.3742	13.1746	F1S232;Q29228	ALDH9A1	F1S232_PIG;AL9A1_PIG	4-trimethylaminobutyraldehyde dehydrogenase	0.843376	0.85373	0.416674	0.409116	0.92338	0.748514	0.923442	0.83184	-0.408722	0.884915	0.81194	0.33184	0.483582	0.84578	0.825396	0.126208	0.49012	-1.15724
764	I3LDM6	13.9991	12.6957	13.9334	12.2889	14.4145	13.7075	12.6862	11.8306	13.8636	11.268	12.8522	12.587	13.275	13.5341	13.9317	14.0639	12.3636	14.8128	13.4795	13.143	13.3794	13.9699	12.8643	13.86	I3LDM6	KRT3	I3LDM6_PIG	Keratin 3	0.0615731	0.2766	-0.99189	0.961944	0.92338	0.157027	0.999957	0.83184	-0.0571555	0.0165829	0.07913	1.14892	0.0661985	0.27015	-0.934734	0.972101	0.86169	-0.214182
765	A0A287AN90;A0A287AZD5	12.8338	13.5065	11.9179	13.1674	13.2599	13.4892	13.2843	13.5868	14.3515	13.3512	14.5104	13.1917	13.539	13.1763	13.4367	12.5095	12.8677	13.5041	13.2767	13.9068	13.4758	13.9617	13.496	13.7721	A0A287AN90;A0A287AZD5	MMP9	A0A287AN90_PIG;A0A287AZD5_PIG	Uncharacterized protein;Matrix metalloproteinase-9	0.0341067	0.18064	0.683533	0.961979	0.92338	0.143116	0.114924	0.40539	0.619069	0.122544	0.37035	-0.540417	0.978963	0.85274	0.0644636	0.274944	0.80712	0.475954
766	F1RMZ8	10.9687	15.3579	15.0165	13.2813	15.361	11.9868	15.5001	12.5156	15.8579	10.0682	9.65006	13.5006	9.63841	13.2798	15.255	0	0	14.5237	12.3765	15.355	14.3911	14.4182	13.3534	13.1657	F1RMZ8	ATP6V1B2	F1RMZ8_PIG	Vacuolar proton pump subunit B	0.97613	0.85373	-0.813306	0.10722	0.59226	-4.87922	0.962407	0.83184	0.181293	0.250309	0.61153	-4.06592	0.81204	0.85274	-0.994599	0.0298602	0.17242	5.06051
767	A0A5G2R8T9;F1SMI8	13.9316	13.4908	12.7111	13.0524	12.8536	14.1523	10.882	13.1496	13.6447	13.4748	13.0679	13.9721	13.3133	14.0051	12.3509	13.4743	13.948	13.1996	12.3525	13.494	15.0936	14.6543	13.7735	14.7779	A0A5G2R8T9;F1SMI8	C6	A0A5G2R8T9_PIG;F1SMI8_PIG	Uncharacterized protein	0.999934	0.85373	-0.333423	0.998141	0.92338	0.0165669	0.888908	0.83184	0.659014	0.999511	0.81194	0.34999	0.891331	0.85274	-0.992437	0.803315	0.86169	0.642447
768	A0A5G2QCV7;A0A5G2RDR7;F1RM55	13.9556	13.9768	13.107	13.8015	13.163	13.2635	13.0479	13.4275	13.2705	13.2578	13.6595	12.915	14.0352	13.8853	13.5656	13.8079	13.0147	13.9438	13.5996	13.2603	12.814	13.3157	12.8117	12.1955	A0A5G2QCV7;A0A5G2RDR7;F1RM55	MAN2A1	A0A5G2QCV7_PIG;A0A5G2RDR7_PIG;F1RM55_PIG	Mannosidase alpha class 2A member 1;Alpha-mannosidase;Alpha-mannosidase	0.499752	0.85373	-0.281549	0.760625	0.92338	0.164186	0.100116	0.37701	-0.545121	0.0830069	0.27423	0.445735	0.785644	0.85274	0.263572	0.00519318	0.04589	-0.709307
769	A0A287BFI2;A0A5G2R5L4;K9J4M9	14.3876	13.6471	13.4186	13.9227	13.5567	13.4197	13.597	13.4244	13.7205	13.6421	14.0449	13.4091	12.577	10.0161	13.2148	11.9043	12.3786	12.8167	11.7166	11.7692	13.4375	12.9148	13.5586	13.5249	A0A287BFI2;A0A5G2R5L4;K9J4M9	COLEC12	A0A287BFI2_PIG;A0A5G2R5L4_PIG;K9J4M9_PIG	Collectin subfamily member 12;Collectin subfamily member 12;Collectin sub-family member 12	0.99558	0.85373	-0.0857299	4.69892e-05	0.00182	-1.57415	0.0243401	0.12561	-0.905128	0.000127221	0.00113	-1.48842	0.0453656	0.20902	0.819398	0.396009	0.86169	0.66902
770	A0A287AEL2	13.6156	13.7975	13.2069	14.5379	13.9639	13.3753	12.9496	13.1839	13.4794	11.0881	12.3713	13.5493	13.1617	14.9223	13.3053	13.7767	13.7356	12.6253	16.0318	12.052	14.2939	12.8177	14.0416	12.7943	A0A287AEL2	KRT14	A0A287AEL2_PIG	Keratin 14	0.18225	0.58347	-0.979267	0.99996	0.92338	-0.161722	0.992274	0.83184	-0.0776632	0.206305	0.52939	0.817546	0.128659	0.39528	-0.901604	0.987092	0.86169	0.0840583
771	Q007T2	13.1405	13.44	12.2355	13.262	12.5296	13.4015	13.7027	14.6263	14.7202	13.561	14.7225	9.11329	14.1443	13.514	13.049	15.2252	13.2375	13.847	13.1834	13.6132	13.6524	13.8626	13.3668	13.8383	Q007T2	CDC42	CDC42_PIG	Cell division control protein 42 homolog	0.906132	0.85373	0.406137	0.628088	0.92338	0.834624	0.934968	0.83184	0.584612	0.952529	0.81194	0.428487	0.999902	0.85274	-0.178475	0.934061	0.86169	-0.250012
772	A0A287AKL6;A0A287AVP9	14.0074	12.8742	12.708	14.3982	13.1473	14.2068	12.3984	12.6369	11.704	12.4963	12.5298	13.5249	13.3492	13.5779	13.0345	11.7705	13.9465	14.3924	12.1933	11.5597	12.4978	12.805	14.0122	14.601	A0A287AKL6;A0A287AVP9	APLP1	A0A287AKL6_PIG;A0A287AVP9_PIG	Amyloid beta precursor like protein 1	0.119226	0.45873	-1.00858	0.97754	0.92338	-0.211817	0.631442	0.83184	-0.612143	0.277186	0.64075	0.79676	0.775678	0.85274	-0.396434	0.847083	0.86169	-0.400326
773	A0A286ZJR8;A0A287AD30	12.8746	13.3952	13.0002	16.0798	17.6262	12.9382	13.057	12.192	12.937	13.1719	13.4981	16.876	12.6232	12.8776	17.1959	12.5394	14.4139	12.934	17.8312	17.6283	16.8942	13.3996	12.3131	12.3956	A0A286ZJR8;A0A287AD30	SVEP1	A0A286ZJR8_PIG;A0A287AD30_PIG	Sushi, von Willebrand factor type A, EGF and pentraxin domain containing 1;Sushi, von Willebrand factor type A, EGF and pentraxin domain containing 1	0.916849	0.85373	-0.697057	0.975996	0.92338	-0.555035	0.820976	0.83184	0.75797	0.995897	0.81194	0.142022	0.440297	0.81641	-1.45503	0.56044	0.86169	1.31301
774	A0A287AE80;A0A287BL83	11.8048	13.3887	9.68208	12.6234	17.2289	16.1765	12.9658	9.37782	12.7538	7.82912	12.586	13.494	16.3468	9.27537	14.4839	13.1663	17.1879	13.7341	13.3361	16.9292	13.7104	14.5114	10.268	17.1301	A0A287AE80;A0A287BL83	LOC100622246	A0A287AE80_PIG;A0A287BL83_PIG	Uncharacterized protein	0.478793	0.85373	-1.98297	0.986208	0.92338	0.548347	0.972878	0.83184	0.830138	0.291518	0.66447	2.53132	0.271985	0.62257	-2.81311	0.999625	0.86169	0.281791
775	A0A5G2QKD9;F1S418	16.0957	13.6447	12.0215	12.9051	12.9703	13.7084	11.7583	15.2197	13.5788	12.3354	13.4026	16.2371	13.0102	12.8629	12.6566	14.9324	14.1131	12.4426	11.3941	12.5188	16.5939	12.3543	10.5399	11.8655	A0A5G2QKD9;F1S418	PRDX3	A0A5G2QKD9_PIG;F1S418_PIG	Peroxiredoxin	0.733696	0.85373	0.197701	0.990707	0.92338	-0.221302	0.3083	0.76427	-1.01317	0.559319	0.81194	-0.419003	0.0579699	0.24247	1.21087	0.45379	0.86169	-0.791866
776	P43030	12.9115	13.1223	13.2642	11.0533	11.1936	13.5341	12.2965	13.8809	14.7479	13.0782	14.0505	13.3743	10.4221	14.0822	12.7009	16.0293	12.3054	12.6942	13.0293	12.1902	13.7267	13.243	13.1171	13.5065	P43030	PPBP	CXCL7_PIG	Platelet basic protein	0.333564	0.8344	1.05821	0.861805	0.92338	0.525809	0.820059	0.83184	0.6223	0.813188	0.81194	-0.532397	0.872861	0.85274	0.435907	0.999559	0.86169	0.0964905
777	Q6QR67	14.4165	12.6506	13.1463	13.5178	13.2273	12.7652	16.3114	16.0126	16.2769	16.0689	16.6883	15.7051	11.6435	14.1942	12.6108	12.5151	12.9346	13.1577	15.0177	16.0727	15.4861	16.211	15.4544	14.8616	Q6QR67	RETN	Q6QR67_PIG	Resistin	0	0	2.88992	0.431003	0.92338	-0.444619	2.35367e-14	0	2.22998	0	0	-3.33454	0.240624	0.57763	0.659938	0	0	2.6746
778	A0A286ZRR3;A0A286ZTB0;A0A286ZVY0;A0A480MVX6;A0A5G2QT34;A0A5G2QX06;A0A5G2R406;A0A5G2R8J3;F1ST01	13.1314	13.6883	13.1503	13.2634	14.3201	13.3113	13.1594	14.963	14.072	14.1305	14.4828	12.9022	14.6658	13.1844	13.8393	15.8304	13.6017	14.9087	13.9624	13.3428	14.1018	12.2574	12.9339	13.8368	A0A286ZRR3;A0A286ZTB0;A0A286ZVY0;A0A480MVX6;A0A5G2QT34;A0A5G2QX06;A0A5G2R406;A0A5G2R8J3;F1ST01	SELENBP1	A0A286ZRR3_PIG;A0A286ZTB0_PIG;A0A286ZVY0_PIG;A0A480MVX6_PIG;A0A5G2QT34_PIG;A0A5G2QX06_PIG;A0A5G2R406_PIG;A0A5G2R8J3_PIG;F1ST01_PIG	Selenium binding protein 1	0.633319	0.85373	0.474179	0.143219	0.68509	0.860911	0.997266	0.83184	-0.0716009	0.777421	0.81194	0.386732	0.530426	0.85274	0.54578	0.0906604	0.38113	-0.932511
779	A0A5G2QM17;A0A5G2QZA1	12.4063	12.856	16.7568	14.4497	12.4417	17.1181	16.9814	15.756	13.9278	11.7827	13.8912	15.353	15.6731	13.1463	11.7666	15.7665	12.7522	13.7493	14.2558	12.24	12.7951	13.2834	12.1155	13.0789	A0A5G2QM17;A0A5G2QZA1	YWHAQ	A0A5G2QM17_PIG;A0A5G2QZA1_PIG	Tyrosine 3-monooxygenase/tryptophan 5-monooxygenase activation protein theta	0.989136	0.85373	0.27725	0.927273	0.92338	-0.529107	0.405645	0.83184	-1.37666	0.78975	0.81194	-0.806357	0.245873	0.58758	1.65391	0.763917	0.86169	-0.847549
780	A0A480L8N8;I3LUZ5	13.027	13.5065	13.4825	0.231145	13.1293	13.663	13.2669	14.4017	13.2106	13.4237	14.6245	13.6591	12.8167	13.2573	13.24	12.9881	12.7279	13.6426	14.9292	14.0049	14.4905	13.3368	12.3216	13.7121	A0A480L8N8;I3LUZ5	KAZALD1	A0A480L8N8_PIG;I3LUZ5_PIG	Kazal-type serine protease inhibitor domain-containing protein 1 isoform X1;Uncharacterized protein	0.24089	0.69357	2.59118	0.394301	0.92338	1.93887	0.124098	0.42903	2.62592	0.992125	0.81194	-0.652313	0.98066	0.85274	-0.0347379	0.90609	0.86169	0.687051
781	A0A287A734;A0A287AWU7;A0A287BLF6;A0A5G2R3E3;A0A5G2R4M0;A0A5G2RBT6;I3LK97	13.0103	13.7343	13.7025	13.2119	13.247	13.3978	13.935	13.3611	13.6744	13.5176	14.0202	13.4181	13.2828	13.213	13.5395	13.2869	13.2057	13.6504	13.1258	12.9965	12.5151	12.4008	13.5457	12.7028	A0A287A734;A0A287AWU7;A0A287BLF6;A0A5G2R3E3;A0A5G2R4M0;A0A5G2RBT6;I3LK97	NA	A0A287A734_PIG;A0A287AWU7_PIG;A0A287BLF6_PIG;A0A5G2R3E3_PIG;A0A5G2R4M0_PIG;A0A5G2RBT6_PIG;I3LK97_PIG	Uncharacterized protein	0.335335	0.83639	0.270426	0.999137	0.92338	-0.0209248	0.0129609	0.07852	-0.502847	0.273875	0.63852	-0.291351	1.66342e-05	0.00039	0.773274	0.0157091	0.10798	-0.481923
782	F1SGP8	13.4821	13.8753	13.568	12.4993	13.9077	13.252	12.9974	13.0205	12.8423	16.3567	13.6793	13.1895	13.0276	13.2805	13.0198	11.055	13.9508	14.6396	13.7014	12.4121	12.5852	12.9015	16.0535	13.0804	F1SGP8	RCN1	F1SGP8_PIG	Reticulocalbin-1	0.976431	0.85373	0.250206	0.980311	0.92338	-0.268529	0.99901	0.83184	0.0249299	0.856447	0.81194	-0.518735	0.993934	0.85274	0.225277	0.951597	0.86169	0.293459
783	A0A2C9F3B6;O02826	13.4492	13.4242	12.3819	13.7793	12.3013	12.6895	13.307	12.4155	12.2945	12.552	14.3387	14.2727	13.1872	13.1122	12.7762	12.1364	13.5011	13.1828	13.448	12.9867	13.7355	13.1405	12.5691	12.734	A0A2C9F3B6;O02826	MSMB	A0A2C9F3B6_PIG;MSMB_PIG	Beta-microseminoprotein	0.939356	0.85373	0.192525	0.999941	0.92338	-0.0215628	0.955144	0.83184	0.0980777	0.955233	0.81194	-0.214087	0.999974	0.85274	0.094447	0.964844	0.86169	0.11964
784	A0A5G2QE07;A0A5G2QFK8;A0A5G2R7M4;F6Q8W1;K7GRV5	12.8537	14.2539	12.7462	13.0281	15.0206	14.0285	13.0302	14.5403	13.0773	13.8862	13.7078	14.575	11.4152	12.8329	14.129	13.2727	13.388	14.0519	12.6033	15.2799	12.6619	13.0045	11.9966	13.0584	A0A5G2QE07;A0A5G2QFK8;A0A5G2R7M4;F6Q8W1;K7GRV5	LGALS3	A0A5G2QE07_PIG;A0A5G2QFK8_PIG;A0A5G2R7M4_PIG;F6Q8W1_PIG;K7GRV5_PIG	Galectin	0.990387	0.85373	0.147661	0.837123	0.92338	-0.47356	0.828227	0.83184	-0.554383	0.666855	0.81194	-0.621221	0.659895	0.85274	0.702044	0.99998	0.86169	-0.0808228
785	A0A5S6HM99;A0A5S6IIV1;P10775	13.7836	13.6797	12.7418	13.1737	12.5419	13.7436	14.9768	14.4695	14.1074	13.0436	13.9128	13.4212	13.2713	13.5088	12.9844	13.8149	12.9205	13.3986	12.988	13.516	13.2361	13.4048	13.2403	13.3676	A0A5S6HM99;A0A5S6IIV1;P10775	RNH1	A0A5S6HM99_PIG;A0A5S6IIV1_PIG;RINI_PIG	Ribonuclease inhibitor	0.0217875	0.13072	0.711163	0.991431	0.92338	0.0390463	0.988559	0.83184	0.0147639	0.0524795	0.19644	-0.672117	0.0671084	0.2707	0.696399	0.999981	0.86169	-0.0242824
786	A0A287AIZ4;A0A287ASA4;A0A287BHZ3	14.1954	12.561	13.2272	13.3438	13.4901	13.501	14.1447	13.3598	12.8432	12.7211	13.3457	13.6416	13.2121	13.7393	13.4017	13.2	13.6485	13.0951	12.9	13.3267	13.3305	13.0509	13.5195	13.759	A0A287AIZ4;A0A287ASA4;A0A287BHZ3	SLC38A10	A0A287AIZ4_PIG;A0A287ASA4_PIG;A0A287BHZ3_PIG	Solute carrier family 38 member 10	0.997163	0.85373	-0.0437252	0.999532	0.92338	-0.00364831	0.999858	0.83184	-0.0720013	0.989878	0.81194	0.0400769	0.999373	0.85274	0.0282761	0.997774	0.86169	-0.068353
787	A0A287B262	12.7213	14.1451	13.8423	11.7994	12.431	12.4745	13.7805	14.0578	13.5228	12.9654	13.8315	13.137	13.8351	12.4831	14.8698	15.2105	12.7129	14.9058	13.0292	13.7247	15.1687	13.1509	13.9128	12.7018	A0A287B262	NA	A0A287B262_PIG	HMA domain-containing protein	0.514111	0.85373	0.646912	0.0970437	0.5559	1.10061	0.479539	0.83184	0.712434	0.784164	0.81194	0.453696	0.99967	0.85274	-0.0655213	0.835984	0.86169	-0.388174
788	A0A287B250;A0A287B2P1	13.0309	12.2252	12.1432	12.966	12.7916	13.2977	12.7691	14.3763	13.8877	12.4197	14.2081	11.8576	12.2645	12.4465	12.635	14.4371	13.1565	13.5739	11.7972	13.4022	12.5602	12.7765	13.2385	12.9491	A0A287B250;A0A287B2P1	CLIC1	A0A287B250_PIG;A0A287B2P1_PIG	Chloride intracellular channel protein	0.546403	0.85373	0.510656	0.89268	0.92338	0.34315	0.996022	0.83184	0.0448558	0.930842	0.81194	-0.167506	0.43186	0.8122	0.4658	0.782818	0.86169	-0.298294
789	A0A287BKG2;F1S7U3	12.4487	13.4807	11.6882	13.2101	12.8929	13.599	15.1261	14.7658	15.4896	14.1138	15.6765	14.1395	11.3446	14.0874	13.4381	12.8745	12.7286	13.3515	13.0852	15.3723	14.9579	14.4755	13.7919	14.3735	A0A287BKG2;F1S7U3	CHI3L1	A0A287BKG2_PIG;F1S7U3_PIG	Chitinase-3-like protein 1	9.66584e-06	0.0002	1.99864	0.997801	0.92338	0.0841914	0.00479447	0.03547	1.45614	2.68473e-05	0.00029	-1.91445	0.564618	0.85274	0.542501	0.00607138	0.05105	1.37195
790	F1SR66	13.8176	12.7963	12.6421	13.3386	13.248	13.3482	13.4673	13.4002	12.8634	13.0236	13.4831	14.0435	13.0529	13.3622	12.6458	12.974	13.4748	13.5707	12.4518	12.0498	13.5823	13.2952	12.3721	12.9248	F1SR66	EPHA4	F1SR66_PIG	EPH receptor A4	0.857991	0.85373	0.181704	0.999649	0.92338	-0.0183992	0.485586	0.83184	-0.419165	0.902227	0.81194	-0.200103	0.126001	0.39266	0.600869	0.404841	0.86169	-0.400766
791	A0A5G2QBU0;A0A5G2R1I7;F1S179	13.8741	14.6897	12.9911	14.6854	11.6785	14.2119	9.93137	11.1126	13.1359	11.5027	11.6905	15.2383	14.2056	13.0139	10.5015	11.6115	12.4203	14.737	12.6999	14.802	15.3159	14.3641	12.2794	12.2085	A0A5G2QBU0;A0A5G2R1I7;F1S179	TSTD1	A0A5G2QBU0_PIG;A0A5G2R1I7_PIG;F1S179_PIG	Thiosulfate sulfurtransferase like domain containing 1	0.359579	0.84937	-1.58654	0.598454	0.92338	-0.940162	0.956072	0.83184	-0.0768227	0.976995	0.81194	0.646374	0.741279	0.85274	-1.50971	0.900265	0.86169	0.86334
792	A0A287BPP9;I3LQ51	14.1599	14.0417	13.0727	14.0006	12.5491	14.0206	13.3954	15.3174	13.9733	13.952	13.899	13.1238	14.8762	13.6398	13.4125	14.1482	13.4927	14.1729	12.5277	13.668	13.7822	12.8817	13.0331	11.393	A0A287BPP9;I3LQ51	PSMB1	A0A287BPP9_PIG;I3LQ51_PIG	Proteasome subunit beta;Proteasome subunit beta type-1	0.854969	0.85373	0.302723	0.865539	0.92338	0.316263	0.171401	0.52096	-0.75983	0.999998	0.81194	0.0135399	0.0247532	0.14237	1.06255	0.0208318	0.13363	-1.07609
793	A0A287A0A6;A0A5G2R0Y2	12.9347	13.7685	13.1662	12.9614	13.1588	12.2691	12.7466	12.9156	13.0672	13.1965	13.8831	12.7189	13.6902	13.0003	13.4019	12.9968	12.5693	13.8026	13.5287	13.1411	13.0915	13.0184	12.7003	13.1906	A0A287A0A6;A0A5G2R0Y2	COL6A6	A0A287A0A6_PIG;A0A5G2R0Y2_PIG	Collagen type VI alpha 6 chain	0.997026	0.85373	0.04486	0.757606	0.92338	0.200401	0.966304	0.83184	0.0686607	0.861765	0.81194	0.155541	0.993141	0.85274	-0.0238007	0.957231	0.86169	-0.131741
794	A0A287A8F5;A0A287AK14;A0A287BIA0;A0A287BNG7;A0A5G2QPK3;A0A5G2RJR4;F1SRS9;P24786	14.0552	10.6741	13.6651	13.8585	12.7437	12.0548	13.3082	13.5282	13.6432	10.7886	13.6507	14.2946	13.8223	13.04	13.5271	12.3952	13.4681	13.1249	13.148	13.5979	14.178	13.8926	0	13.2867	A0A287A8F5;A0A287AK14;A0A287BIA0;A0A287BNG7;A0A5G2QPK3;A0A5G2RJR4;F1SRS9;P24786	NTRK3	A0A287A8F5_PIG;A0A287AK14_PIG;A0A287BIA0_PIG;A0A287BNG7_PIG;A0A5G2QPK3_PIG;A0A5G2RJR4_PIG;F1SRS9_PIG;NTRK3_PIG	Tyrosine-protein kinase receptor;NT-3 growth factor receptor;NT-3 growth factor receptor;Tyrosine-protein kinase receptor;Tyrosine-protein kinase receptor;Tyrosine-protein kinase receptor;Tyrosine-protein kinase receptor;NT-3 growth factor receptor	0.995534	0.85373	0.360317	0.991523	0.92338	0.387659	0.827547	0.83184	-1.49139	0.999928	0.81194	0.0273421	0.70064	0.85274	1.85171	0.648496	0.86169	-1.87905
795	A0A287ATD0;F1SGI7	12.5526	13.9798	13.6146	12.2013	14.4134	11.9442	13.6394	13.3442	13.0849	13.828	13.9575	13.6157	13.6624	11.0799	13.203	13.5559	13.8667	12.9484	17.331	14.001	13.1779	14.1697	12.0647	12.7117	A0A287ATD0;F1SGI7	KRT75	A0A287ATD0_PIG;F1SGI7_PIG	Keratin 75	0.873069	0.85373	0.460636	0.999974	0.92338	-0.0649689	0.406471	0.83184	0.791679	0.892828	0.81194	-0.525605	0.846578	0.85274	-0.331043	0.409394	0.86169	0.856648
796	A0A286ZV23;A0A5G2QBP1;A0A5G2QTG3;A0A5G2R2I8;A0A5G2RCJ6;I3LMY0	13.4912	13.293	14.1401	13.7431	12.4407	13.0571	14.1931	13.1395	13.3898	12.6484	13.7009	11.8439	12.8859	13.5482	13.1409	13.0296	12.9872	13.0585	13.299	14.5732	11.4701	12.6621	12.8532	13.3821	A0A286ZV23;A0A5G2QBP1;A0A5G2QTG3;A0A5G2R2I8;A0A5G2RCJ6;I3LMY0	EGFR	A0A286ZV23_PIG;A0A5G2QBP1_PIG;A0A5G2QTG3_PIG;A0A5G2R2I8_PIG;A0A5G2RCJ6_PIG;I3LMY0_PIG	Receptor protein-tyrosine kinase	0.947916	0.85373	-0.208281	0.89851	0.92338	-0.252469	0.807936	0.83184	-0.320927	0.998656	0.81194	-0.0441873	0.983267	0.85274	0.112645	0.996308	0.86169	-0.0684581
797	A0A5G2R5F2;F1SD66	12.7816	12.6104	11.5834	12.3706	12.4814	13.1343	15.1264	15.8131	14.8171	14.9273	14.4994	14.5077	11.9592	12.8957	12.8072	13.4609	13.4946	13.252	13.3754	14.639	13.346	14.9442	14.5311	14.6728	A0A5G2R5F2;F1SD66	CHGA	A0A5G2R5F2_PIG;F1SD66_PIG	Chromogranin-A	1.33227e-15	0	2.45486	0.37008	0.92338	0.484629	5.16684e-08	0	1.75775	6.20233e-10	0	-1.97024	0.134518	0.4088	0.697112	0.000155901	0.00255	1.27312
798	A0A286ZZL6;A0A287ALG9;A0A5G2Q9S9;A0A5G2QPH4;A0A5G2R267;F1SGT2;K7GLU2	13.8177	13.4826	13.5983	13.1138	13.2562	13.6432	13.0691	14.4485	13.2033	13.9816	13.54	13.498	13.9324	13.6064	13.8227	14.4076	13.0163	13.6521	13.1316	13.2902	10.6284	11.7031	12.8576	12.5597	A0A286ZZL6;A0A287ALG9;A0A5G2Q9S9;A0A5G2QPH4;A0A5G2R267;F1SGT2;K7GLU2	APIP	A0A286ZZL6_PIG;A0A287ALG9_PIG;A0A5G2Q9S9_PIG;A0A5G2QPH4_PIG;A0A5G2R267_PIG;F1SGT2_PIG;K7GLU2_PIG	Methylthioribulose-1-phosphate dehydratase	0.974885	0.85373	0.138143	0.83214	0.92338	0.254275	0.00856497	0.05638	-1.12353	0.973556	0.81194	0.116132	0.00200443	0.0226	1.26168	0.000248914	0.00372	-1.37781
799	A0A287BRL8	13.4184	13.4929	12.9786	13.3685	13.1542	13.6471	13.9659	14.5503	14.3225	13.5765	14.6433	13.6474	12.9769	12.9169	13.1889	13.2146	13.1894	13.6255	13.358	14.0275	13.5984	13.2624	12.6581	13.4456	A0A287BRL8	MARCKS	A0A287BRL8_PIG	Myristoylated alanine rich protein kinase C substrate	0.000305405	0.00369	0.774398	0.845254	0.92338	-0.157919	0.995169	0.83184	0.0484018	6.83367e-06	9e-05	-0.932317	0.00128711	0.01576	0.725996	0.711057	0.86169	0.206321
800	A0A287B7V8;A0A287BLQ5;F1RMT6;F1RMU0;I3LAP4;I3LK54;I3LKY2	13.4047	13.8536	13.4774	13.7033	13.526	13.3861	13.1603	13.7988	13.3782	12.8745	13.8712	13.1888	12.6376	11.7441	13.9727	12.8916	12.8196	13.1748	12.7561	13.6839	12.8122	13.5639	10.8125	12.8222	A0A287B7V8;A0A287BLQ5;F1RMT6;F1RMU0;I3LAP4;I3LK54;I3LKY2	PCDHGA4;PCDHGA4;PCDHGA4;PCDHGA6;PCDHGA4;PCDHGA4;PCDHGA4	A0A287B7V8_PIG;A0A287BLQ5_PIG;F1RMT6_PIG;F1RMU0_PIG;I3LAP4_PIG;I3LK54_PIG;I3LKY2_PIG	Protocadherin gamma subfamily A, 4;Protocadherin gamma subfamily A, 4;Protocadherin gamma subfamily A, 4;Protocadherin gamma subfamily A, 6;Protocadherin gamma subfamily A, 4;Protocadherin gamma subfamily A, 4;Protocadherin gamma subfamily A, 4	0.955349	0.85373	-0.179926	0.18333	0.78434	-0.685176	0.0782371	0.30998	-0.816723	0.437224	0.81194	-0.505251	0.230826	0.5655	0.636797	0.971964	0.86169	-0.131547
801	F1REZ2;I3LFP3;K7GLS1	12.5307	12.8734	12.997	12.7267	12.9485	13.165	13.5985	14.0655	15.4779	13.45	16.0244	13.2053	13.2425	13.628	12.721	12.6978	13.021	13.4329	12.7243	13.3828	13.4361	12.5963	13.1975	12.7798	F1REZ2;I3LFP3;K7GLS1	VCAN	F1REZ2_PIG;I3LFP3_PIG;K7GLS1_PIG	Versican	8.66807e-05	0.00135	1.43003	0.938382	0.92338	0.250297	0.999747	0.83184	0.145892	0.00122995	0.00809	-1.17974	0.000238086	0.004	1.28414	0.96181	0.86169	-0.104405
802	A0A287B4B7;A0A5G2QSK4	13.3127	13.1912	12.5765	12.9478	13.233	12.9316	12.8602	14.9453	14.3291	13.5579	14.1606	12.0527	14.6666	13.1142	13.7079	15.2105	13.5331	14.4992	13.0914	13.281	12.6392	12.9881	11.8631	12.8852	A0A287B4B7;A0A5G2QSK4	GDI2	A0A287B4B7_PIG;A0A5G2QSK4_PIG	Rab GDP dissociation inhibitor	0.356019	0.84811	0.618837	0.0263869	0.2605	1.08978	0.877314	0.83184	-0.240803	0.644793	0.81194	0.470945	0.0896703	0.32562	0.859639	0.00243019	0.02419	-1.33058
803	F1S6S9	10.6882	12.7581	13.1358	14.2306	13.075	13.6827	15.5895	15.2019	16.4163	15.4977	15.9883	15.1278	10.7334	12.115	13.5187	12.464	12.0895	15.7004	14.6514	15.5237	15.0485	16.0611	15.2296	14.8893	F1S6S9	PRTN3	F1S6S9_PIG	Proteinase 3	3.31099e-05	0.00055	2.70851	0.982736	0.92338	-0.158237	0.00035653	0.00408	2.30553	3.72671e-06	5e-05	-2.86675	0.967628	0.85274	0.402985	5.18513e-05	0.00107	2.46377
804	Q7M2W6	15.8824	10.5343	10.9139	13.636	10.5467	11.876	11.5691	15.5671	13.4712	10.9255	10.8354	15.6868	13.8698	15.7351	16.072	15.1014	10.5003	10.0886	11.4052	10.317	15.1752	11.171	11.2933	14.3207	Q7M2W6	CRYAB	CRYAB_PIG	Alpha-crystallin B chain	0.532573	0.85373	0.777645	0.577189	0.92338	1.32967	0.995714	0.83184	0.0488561	0.999611	0.81194	0.552022	0.481935	0.84462	0.728789	0.453304	0.86169	-1.28081
805	A0A287AKM8	13.5311	13.2179	13.1636	13.0955	13.26	12.7138	13.8733	13.4843	11.2443	13.399	13.0898	14.2759	12.4945	12.9583	12.468	12.4376	12.2472	13.1632	11.0031	10.8726	13.8592	13.4789	9.95057	12.771	A0A287AKM8	CDSN	A0A287AKM8_PIG	Corneodesmosin	0.999257	0.85373	0.0641409	0.800619	0.92338	-0.535496	0.198089	0.57239	-1.17439	0.729094	0.81194	-0.599637	0.153855	0.43951	1.23853	0.682048	0.86169	-0.638897
806	F1RGK2	13.1065	13.3852	13.2546	13.234	13.5962	12.84	13.7475	13.661	13.6339	13.0196	13.366	13.2176	12.6429	12.8245	14.5941	12.3993	12.6696	13.4859	14.0582	13.2342	12.5737	13.3037	13.3254	12.8005	F1RGK2	MEGF8	F1RGK2_PIG	Multiple EGF like domains 8	0.996371	0.85373	0.204833	0.98746	0.92338	-0.13336	0.830386	0.83184	-0.0201376	0.950185	0.81194	-0.338193	0.934598	0.85274	0.22497	0.634087	0.86169	0.113223
807	F1S3J7	13.318	12.9121	12.9571	13.3321	12.4513	13.2069	12.6807	12.7881	13.4931	13.3515	12.6978	12.7446	13.0929	12.8542	12.6806	12.9974	13.9879	12.438	13.1672	12.9374	12.5225	13.0677	13.0474	13.7234	F1S3J7	PAPLN	F1S3J7_PIG	Papilin, proteoglycan like sulfated glycoprotein	0.999869	0.85373	-0.0702716	0.981253	0.92338	-0.0210853	0.841467	0.83184	0.04803	0.971282	0.81194	0.0491863	0.834796	0.85274	-0.118302	0.965084	0.86169	0.0691153
808	A0A5G2RCJ7;I3L826	13.3231	13.0452	12.99	13.1146	13.5489	13.6473	13.5246	13.2287	13.831	12.8989	12.8494	13.3363	13.0051	13.0456	13.1427	12.8036	13.0109	12.8058	12.6368	12.9036	12.9521	12.7658	12.8963	13.0962	A0A5G2RCJ7;I3L826	MAN1C1	A0A5G2RCJ7_PIG;I3L826_PIG	alpha-1,2-Mannosidase;alpha-1,2-Mannosidase	1	0.85373	-5.64145e-05	0.101069	0.5719	-0.309258	0.0188735	0.10449	-0.403088	0.101348	0.3179	-0.309202	0.0192965	0.1216	0.403032	0.900394	0.86169	-0.0938298
809	A0A287AXI8	14.5742	13.647	12.8658	12.4006	13.0502	13.477	14.5544	14.0884	14.7718	13.8149	14.544	14.27	13.0875	13.6835	13.0872	12.7921	12.9735	13.6607	13.8517	13.8695	14.1941	14.0264	13.2905	13.9357	A0A287AXI8	FSTL3	A0A287AXI8_PIG	Follistatin like 3	1.83071e-06	4e-05	1.00477	0.987549	0.92338	-0.121711	0.0249674	0.1265	0.525499	1.78293e-07	0	-1.12648	0.161668	0.45726	0.479269	0.00790915	0.06342	0.647211
810	A0A5G2QAS4;A0A5G2QEA9;A0A5G2QNG4;A2TEQ2;B3TFD9	12.1343	13.8076	13.6344	14.0878	13.7598	13.3027	13.287	13.6649	13.3194	13.7089	13.7883	13.1132	13.2679	13.2249	12.4857	13.0015	12.8809	12.7566	12.5734	13.2892	12.2935	13.5665	13.3815	12.2601	A0A5G2QAS4;A0A5G2QEA9;A0A5G2QNG4;A2TEQ2;B3TFD9	NECTIN2	A0A5G2QAS4_PIG;A0A5G2QEA9_PIG;A0A5G2QNG4_PIG;A2TEQ2_PIG;B3TFD9_PIG	Uncharacterized protein;Uncharacterized protein;Uncharacterized protein;Nectin-2 isoform alpha;Nectin-2 isoform delta	0.999621	0.85373	0.0258719	0.128126	0.64158	-0.518164	0.0685912	0.27836	-0.560379	0.101932	0.3179	-0.544036	0.0529484	0.22918	0.586251	0.988424	0.86169	-0.0422148
811	A5GFX7	12.3578	13.1872	15.7744	12.2855	15.5093	12.4763	17.5844	13.3128	14.5189	14.9047	13.8259	12.9097	15.8838	11.8718	12.9979	13.0057	12.512	12.6371	13.218	14.3431	12.1339	12.1099	12.4915	12.0294	A5GFX7	CTSZ	A5GFX7_PIG	Cathepsin Z	0.622021	0.85373	0.910962	0.925713	0.92338	-0.447024	0.633033	0.83184	-0.877451	0.264847	0.62642	-1.35799	0.0846154	0.31122	1.78841	0.932635	0.86169	-0.430428
812	A0A5G2QZZ3	11.4938	13.5081	11.8962	12.7767	10.7964	11.5628	12.0512	10.8696	12.9405	13.5146	12.5111	16.227	12.7064	11.1589	10.8843	13.9033	12.7633	13.04	13.4472	12.4994	11.4393	13.6471	11.7181	14.8431	A0A5G2QZZ3	LOC110258364	A0A5G2QZZ3_PIG	LIM zinc-binding domain-containing protein	0.159263	0.551	1.01334	0.858957	0.92338	0.403704	0.790863	0.83184	0.926709	0.562813	0.81194	-0.609636	0.735248	0.85274	0.0866316	0.99803	0.86169	0.523004
813	A0A287B7K8;F1S1C9	13.6308	13.6976	13.981	12.9458	13.7519	13.4976	12.9819	13.1456	12.9011	12.7969	13.7589	13.0756	12.8742	13.5794	13.9351	13.0747	12.6487	13.3061	12.9861	13.3332	12.5564	13.303	13.0528	12.6548	A0A287B7K8;F1S1C9	OLFML2B	A0A287B7K8_PIG;F1S1C9_PIG	Olfactomedin like 2B	0.0263633	0.15181	-0.474102	0.283736	0.92338	-0.347736	0.0446853	0.20303	-0.603049	0.73129	0.81194	0.126366	0.999611	0.85274	0.128947	0.793596	0.86169	-0.255313
814	F1S3Q7;Q9BDJ5	12.4695	12.7784	13.6616	13.2205	13.8952	13.6279	13.5685	13.3176	13.2104	12.295	13.4447	11.4281	13.0123	13.3593	13.5239	9.60838	13.6596	13.348	13.8169	13.4419	11.144	13.0021	12.463	13.4402	F1S3Q7;Q9BDJ5	VNN1	F1S3Q7_PIG;VNN1_PIG	Pantetheinase	0.886694	0.85373	-0.398163	0.814712	0.92338	-0.523606	0.943424	0.83184	-0.390857	0.998523	0.81194	-0.125442	0.998974	0.85274	-0.00730582	0.990029	0.86169	0.132748
815	A0A5G2R8I6;D9U8D1;F2Z536	12.4382	11.5811	13.9322	13.3806	12.6011	11.7479	12.3887	12.9706	12.3527	14.3992	13.0334	13.3936	14.3667	13.4301	13.8982	13.2874	13.1425	12.5031	13.349	13.1269	13.9213	14.4346	13.2875	12.2462	A0A5G2R8I6;D9U8D1;F2Z536	DYNLL2;DYNLL1;DYNLL2	A0A5G2R8I6_PIG;D9U8D1_PIG;F2Z536_PIG	Dynein light chain	0.593599	0.85373	0.476198	0.219105	0.85988	0.824497	0.412509	0.83184	0.780729	0.90501	0.81194	0.348299	0.987807	0.85274	-0.304531	0.986083	0.86169	-0.043768
816	A0A286ZRV9;A0A5G2QWT2	12.1501	11.7588	12.3525	14.1694	12.1606	13.7322	12.0294	11.9417	13.8419	11.045	11.2322	13.6847	15.2967	12.4184	13.1476	13.2331	14.2268	12.2606	13.341	14.359	13.9392	13.0324	15.0168	14.27	A0A286ZRV9;A0A5G2QWT2	NA	A0A286ZRV9_PIG;A0A5G2QWT2_PIG	Ig-like domain-containing protein	0.983722	0.85373	-0.424763	0.426688	0.92338	0.709946	0.367216	0.82805	1.27245	0.261614	0.62411	1.13471	0.262128	0.61254	-1.69722	0.997984	0.86169	0.562506
817	F1SEC5	13.4619	13.8102	13.7298	12.2979	13.0667	13.2401	13.9702	13.4295	12.2186	14.0507	14.6297	13.2013	12.2485	12.9976	12.5731	12.5039	12.9554	13.766	12.0169	13.4185	12.4664	12.4804	12.5145	12.4761	F1SEC5	CGREF1	F1SEC5_PIG	Uncharacterized protein	0.899863	0.85373	0.315572	0.515611	0.92338	-0.427033	0.319181	0.77082	-0.705642	0.176549	0.47805	-0.742605	0.108896	0.35939	1.02121	0.978614	0.86169	-0.278609
818	A0A5G2RFM2;F1RMZ6;I3LQJ4	13.6032	13.4895	13.0306	12.6451	13.5927	12.5736	13.3203	12.7491	13.3063	14.254	13.7683	13.0681	12.7232	13.3426	13.6998	13.1803	13.0074	13.8536	13.3664	12.8909	12.4602	13.3805	12.0639	12.6953	A0A5G2RFM2;F1RMZ6;I3LQJ4	GFRA2	A0A5G2RFM2_PIG;F1RMZ6_PIG;I3LQJ4_PIG	GDNF family receptor alpha 2;GDNF family receptor alpha-2;GDNF family receptor alpha 2	0.773625	0.85373	0.255205	0.878218	0.92338	0.145362	0.773693	0.83184	-0.346269	0.996832	0.81194	-0.109843	0.246861	0.58767	0.601474	0.312942	0.85491	-0.491632
819	A0A287B5M2	15.5146	9.40502	12.7271	13.8302	15.5462	15.5553	11.7364	11.2516	16.5364	13.0299	13.4517	15.1807	8.75362	13.6979	12.3127	13.2733	14.5227	14.5319	10.7273	9.39981	14.0539	9.89187	14.4011	15.1465	A0A287B5M2	MUC4	A0A287B5M2_PIG	Uncharacterized protein	0.997483	0.85373	-0.231943	0.848972	0.92338	-0.914367	0.552435	0.83184	-1.49299	0.925397	0.81194	-0.682425	0.670914	0.85274	1.26104	0.950367	0.86169	-0.57862
820	A0A286ZQ21;A0A5G2QWW1;I3LVB2	14.0002	11.6515	13.4703	12.9681	12.6327	12.1567	12.122	11.7163	13.268	11.6566	13.2045	12.8436	12.7873	13.9801	13.6405	12.5802	13.9474	11.6185	13.0959	12.8603	12.8847	13.3798	13.452	13.8478	A0A286ZQ21;A0A5G2QWW1;I3LVB2	MEGF6	A0A286ZQ21_PIG;A0A5G2QWW1_PIG;I3LVB2_PIG	Multiple EGF like domains 6	0.81219	0.85373	-0.344759	0.938698	0.92338	0.279084	0.837532	0.83184	0.440172	0.463869	0.81194	0.623842	0.326686	0.69644	-0.78493	0.992564	0.86169	0.161088
821	A0A287AJ27;A0A287AY78;F1SIC6;M3VK17	12.7872	13.3409	13.2945	13.4363	13.5099	12.6128	13.4219	13.3752	12.8774	13.6286	12.9944	13.3906	12.7535	12.5289	13.65	13.2997	13.4907	13.1619	13.2119	12.942	12.2343	12.9706	12.9179	12.1302	A0A287AJ27;A0A287AY78;F1SIC6;M3VK17	CD276	A0A287AJ27_PIG;A0A287AY78_PIG;F1SIC6_PIG;M3VK17_PIG	CD276 molecule	0.999787	0.85373	0.117759	0.999949	0.92338	-0.0161524	0.265567	0.69379	-0.429102	0.999154	0.81194	-0.133911	0.384078	0.76595	0.54686	0.22741	0.73175	-0.412949
822	A0A5G2R274;P80276	12.8177	12.0178	12.2622	12.1667	12.7591	12.7793	12.8696	14.9249	13.8787	12.7035	14.0704	12.3493	12.5267	12.5826	12.8237	13.27	12.4033	13.0833	12.4031	13.0136	12.6359	13.2928	11.5686	13.1777	A0A5G2R274;P80276	AKR1B1	A0A5G2R274_PIG;ALDR_PIG	Aldo-keto reductase family 1 member B1	0.015168	0.09569	0.998947	0.80098	0.92338	0.314448	0.939158	0.83184	0.214824	0.171034	0.4716	-0.684499	0.0957112	0.33894	0.784123	0.988954	0.86169	-0.0996241
823	A0A5G2Q8C3;A0A5G2QIC5;A0A5G2R924;F1RNB8	13.7194	13.8147	16.0401	11.5741	12.3382	10.9316	10.7619	10.7269	15.0579	13.1827	11.7481	14.4218	13.2509	14.1372	13.297	15.4628	12.7372	11.8649	12.2317	12.3824	13.6931	12.8449	13.4085	11.6125	A0A5G2Q8C3;A0A5G2QIC5;A0A5G2R924;F1RNB8	SPTA1	A0A5G2Q8C3_PIG;A0A5G2QIC5_PIG;A0A5G2R924_PIG;F1RNB8_PIG	Spectrin alpha, erythrocytic 1;Spectrin alpha, erythrocytic 1;Spectrin alpha, erythrocytic 1;Spectrin alpha, erythrocytic 1	0.949356	0.85373	-0.419769	0.980993	0.92338	0.388683	0.901929	0.83184	-0.374141	0.795478	0.81194	0.808452	0.998417	0.85274	-0.0456278	0.698175	0.86169	-0.762824
824	A0A287BF97	12.2005	11.7246	13.8583	10.9339	13.1216	13.2595	13.5592	15.2196	13.2725	13.4397	14.147	13.1119	12.4446	12.5648	13.4858	15.1776	12.5728	14.3973	12.2458	13.0921	12.7812	13.2528	13.0114	12.3791	A0A287BF97	EEF1D	A0A287BF97_PIG	Eukaryotic translation elongation factor 1 delta	0.0769165	0.3235	1.27525	0.169337	0.75189	0.92407	0.770519	0.83184	0.277336	0.981122	0.81194	-0.351182	0.56452	0.85274	0.997916	0.735975	0.86169	-0.646733
825	F6Q697;K7GME6	12.2301	14.2844	13.5006	14.163	14.0587	13.3781	12.7665	13.5857	13.9318	13.4523	13.8166	12.1744	11.8083	12.6287	11.5104	13.1983	12.6495	13.5611	13.6892	13.1022	13.3484	13.7341	11.0154	13.293	F6Q697;K7GME6	S100A9	F6Q697_PIG;K7GME6_PIG	EF-hand domain-containing protein	0.886513	0.85373	-0.314589	0.0814087	0.51045	-1.04309	0.590017	0.83184	-0.572082	0.346499	0.71762	-0.728502	0.94563	0.85274	0.257493	0.695167	0.86169	0.471008
826	A0A287BPE2	12.704	13.1723	12.7187	12.913	13.08	13.4117	14.459	14.2311	14.944	14.2284	14.9396	13.4918	12.7623	13.2791	12.9639	12.4763	13.3852	14.9345	13.4314	13.609	13.5063	13.4796	13.6683	13.2554	A0A287BPE2	CSF1	A0A287BPE2_PIG	Colony stimulating factor 1	3.58455e-06	8e-05	1.38237	0.674217	0.92338	0.300256	0.263118	0.68955	0.491719	0.000854649	0.00586	-1.08212	0.0162311	0.10459	0.890655	0.881046	0.86169	0.191463
827	P51525	13.1736	12.981	12.4626	12.484	11.7812	12.4023	14.9592	14.7739	15.2795	14.7125	15.8448	14.4793	11.785	13.3912	11.8115	13.4633	11.2585	10.9168	13.443	13.9497	14.5061	14.6957	13.865	13.8052	P51525	NA	PF12_PIG	Prophenin-2	1.11022e-16	0	2.46074	0.381462	0.92338	-0.443066	0.00033366	0.00387	1.49667	0	0	-2.9038	0.000843149	0.01129	0.964068	1.74963e-07	1e-05	1.93974
828	I3LES7;I3LUA0	14.6732	13.6205	12.0436	12.4258	14.0216	13.8965	15.139	12.3612	12.8216	13.4237	12.787	12.2961	13.466	13.2623	12.6805	10.4311	12.4141	11.3653	13.565	13.9957	13.6604	13.4106	13.3062	12.9955	I3LES7;I3LUA0	LIPG	I3LES7_PIG;I3LUA0_PIG	Lipase G, endothelial type;Lipase G, endothelial type	0.919606	0.85373	-0.30877	0.110762	0.60463	-1.17698	0.97673	0.83184	0.0420366	0.370696	0.74321	-0.868207	0.732525	0.85274	-0.350807	0.0383464	0.20247	1.21901
829	A0A287B1T2	15.3582	15.5062	13.8842	13.8192	13.2132	12.9298	13.9917	11.5524	12.1371	14.4633	14.215	11.495	13.6561	14.6833	14.3553	12.5315	13.4983	15.1464	9.19172	11.903	13.8133	12.196	13.3427	12.3807	A0A287B1T2	EHD3	A0A287B1T2_PIG	EH domain containing 3	0.194837	0.61235	-1.14274	0.98043	0.92338	-0.139986	0.0144232	0.08562	-1.98057	0.383699	0.7674	1.00276	0.754187	0.85274	0.837821	0.0372755	0.19804	-1.84058
830	A0A5G2QHN7;A0A5G2RDZ7;A0A5G2REB0;A0A5K1UD05;A0A5S8KXS2;Q29221	11.6156	10.6433	15.7027	12.1892	12.0461	12.4164	15.935	15.996	15.1253	13.2164	15.4086	16.203	14.7802	12.2212	11.6091	14.2759	16.0013	13.2231	11.9717	12.2447	12.6263	12.9143	12.3182	12.3926	A0A5G2QHN7;A0A5G2RDZ7;A0A5G2REB0;A0A5K1UD05;A0A5S8KXS2;Q29221	CAPZA2;CAPZA2;CAPZA2;CAPZA1;CAPZA2;CAPZA2	A0A5G2QHN7_PIG;A0A5G2RDZ7_PIG;A0A5G2REB0_PIG;A0A5K1UD05_PIG;A0A5S8KXS2_PIG;CAZA2_PIG	F-actin-capping protein subunit alpha;F-actin-capping protein subunit alpha;F-actin-capping protein subunit alpha;F-actin-capping protein subunit alpha;F-actin-capping protein subunit alpha;F-actin-capping protein subunit alpha-2	0.000112241	0.00161	2.8785	0.333797	0.92338	1.24959	0.987829	0.83184	-0.0242437	0.0544724	0.20022	-1.6289	4.54613e-05	0.00089	2.90274	0.181794	0.63226	-1.27384
831	A0A5G2QZ16;F1RWJ5	13.1585	13.6041	13.119	12.9522	13.1525	13.0948	13.3174	13.9304	13.9628	12.8556	13.0163	12.8415	13.6769	14.5436	14.1516	15.8291	14.3977	14.3177	12.863	13.3604	12.678	13.2983	13.1377	13.4121	A0A5G2QZ16;F1RWJ5	KPNB1	A0A5G2QZ16_PIG;F1RWJ5_PIG	Karyopherin subunit beta 1;Importin subunit beta-1	0.945176	0.85373	0.140451	1.62913e-06	0.00012	1.30592	0.997931	0.83184	-0.0553044	2.76742e-05	0.0003	1.16547	0.889969	0.85274	0.195756	3.81819e-07	1e-05	-1.36122
832	A0A288CG57	12.6494	12.8872	12.6779	13.0225	13.1724	13.0379	12.7704	14.7561	13.5182	13.1536	14.1728	12.032	13.0542	13.0566	13.5796	15.8379	12.9644	14.1051	12.5574	13.0055	12.8744	12.86	13.119	12.878	A0A288CG57	EEF1A1	A0A288CG57_PIG	Elongation factor 1-alpha	0.585076	0.85373	0.492662	0.161035	0.73282	0.858397	0.992271	0.83184	-0.0255093	0.844743	0.81194	0.365735	0.433014	0.8122	0.518171	0.0842706	0.3611	-0.883906
833	A0A287AFV9;I3LGV0	16.2493	12.561	13.1089	13.7559	12.3119	15.3633	12.7222	12.8734	13.5925	15.1951	12.9719	12.2495	11.7818	11.7952	12.5756	12.2458	13.4249	15.6434	12.7767	13.485	11.074	13.2074	13.0721	14.9864	A0A287AFV9;I3LGV0	CDON	A0A287AFV9_PIG;I3LGV0_PIG	Cell adhesion associated, oncogene regulated;Cell adhesion associated, oncogene regulated	0.816652	0.85373	-0.624272	0.485665	0.92338	-0.980553	0.636378	0.83184	-0.791443	0.946188	0.81194	-0.356281	0.987088	0.85274	0.167171	0.996779	0.86169	0.18911
834	P12026	13.6981	13.3842	12.1678	12.5688	12.6573	12.1992	13.2201	13.9197	12.6966	12.488	13.6131	13.0656	13.1701	13.3929	12.9954	14.5949	13.4483	13.5435	12.4342	13.3945	12.3662	13.4438	12.6541	12.585	P12026	DBI	ACBP_PIG	Acyl-CoA-binding protein	0.510071	0.85373	0.387947	0.0249358	0.25153	0.744949	0.964268	0.83184	0.0337443	0.470128	0.81194	0.357003	0.823522	0.85274	0.354202	0.0912019	0.38155	-0.711205
835	A0A5G2Q717;A0A5G2R7W7	12.3448	0	13.4705	12.6436	13.6526	14.1155	13.5951	14.4528	13.2711	12.8145	14.4845	12.4466	12.8485	13.5071	13.3499	0	13.3055	12.5009	11.7466	13.131	0	14.4296	12.0363	0	A0A5G2Q717;A0A5G2R7W7	ELN	A0A5G2Q717_PIG;A0A5G2R7W7_PIG	Elastin	0.793888	0.85373	2.47292	0.999974	0.92338	-0.119179	0.80999	0.83184	-2.48058	0.775118	0.81194	-2.5921	0.281806	0.63116	4.9535	0.820609	0.86169	-2.3614
836	A3F9C4;A3F9C5;Q2V6R9	13.6807	12.9512	12.4665	13.089	12.5504	12.9668	13.3247	13.4574	13.5853	12.1336	13.0195	13.6093	12.6869	12.8939	12.2036	12.222	13.1325	13.2064	12.1637	12.8875	12.5276	13.3986	13.1423	13.0207	A3F9C4;A3F9C5;Q2V6R9	MADCAM1	A3F9C4_PIG;A3F9C5_PIG;Q2V6R9_PIG	Mucosal addressin cell adhesion molecule-1 isoform b;Mucosal addressin cell adhesion molecule-1 isoform c;Mucosal addressin cell adhesion molecule 1 isoform a	0.619842	0.85373	0.237536	0.856275	0.92338	-0.226534	0.991054	0.83184	-0.094012	0.192784	0.50746	-0.46407	0.486356	0.84889	0.331548	0.96278	0.86169	0.132522
837	P12067;P12068;P12069	11.4988	11.7031	12.1784	12.6861	12.7018	11.4407	14.6875	13.8695	13.7801	13.3882	14.6926	13.3374	12.7934	11.6277	13.2751	12.9758	12.1149	13.0863	13.6504	13.7903	13.5484	14.3552	12.8217	13.4374	P12067;P12068;P12069	NA	LYSC1_PIG;LYSC2_PIG;LYSC3_PIG	Lysozyme C-1;Lysozyme C-2;Lysozyme C-3	6.39528e-10	0	1.92439	0.121093	0.62141	0.610702	1.3175e-08	0	1.56575	0.000199217	0.00169	-1.31369	0.997547	0.85274	0.358649	0.000467777	0.00587	0.955043
838	I3LII3	12.5398	12.637	12.11	12.5134	12.4622	12.9621	12.483	14.5607	13.4008	12.2091	14.2156	11.4242	12.6349	12.5286	12.9125	14.5546	12.9339	14.0937	12.276	11.8948	12.2796	12.5395	12.7679	13.0358	I3LII3	EEF2	I3LII3_PIG	Eukaryotic translation elongation factor 2	0.594321	0.85373	0.5115	0.30681	0.92338	0.738959	0.991658	0.83184	-0.0718055	0.961026	0.81194	0.227459	0.437006	0.81416	0.583305	0.177896	0.62372	-0.810765
839	B0FYK2	13.5072	13.0536	13.2813	10.8454	13.9642	14.2186	12.7583	13.0427	13.6271	11.9401	12.5283	11.7911	11.7875	12.4299	12.5323	11.7045	14.1452	12.4766	12.4775	13.2226	14.4319	12.7601	13.2594	12.5857	B0FYK2	CXCL9	B0FYK2_PIG	C-X-C motif chemokine	0.675382	0.85373	-0.530436	0.548187	0.92338	-0.632369	0.999984	0.83184	-0.022176	0.996771	0.81194	-0.101934	0.718351	0.85274	-0.50826	0.571582	0.86169	0.610193
840	A7YX24	13.183	12.9209	12.958	13.347	12.3698	13.1582	13.0698	13.9972	12.2498	13.0321	13.3347	11.4778	14.5831	13.3544	15.0308	15.2994	14.948	13.6438	13.7391	13.9562	12.4129	13.8922	13.6396	13.8252	A7YX24	SNCG	A7YX24_PIG	Gamma-synuclein	0.981131	0.85373	-0.129261	0.00017862	0.00572	1.48711	0.593171	0.83184	0.588043	3.16765e-05	0.00033	1.61637	0.365923	0.74666	-0.717304	0.0228405	0.1423	-0.899066
841	Q29056	12.3123	9.762	12.6299	10.9753	11.4426	10.7916	13.8969	17.4586	16.8138	15.2877	17.067	15.4178	9.91533	9.79857	11.4603	10.9463	9.98964	9.47443	14.0381	16.417	15.1865	17.4175	16.415	16.1052	Q29056	IL1RN	IL1RA_PIG	Interleukin-1 receptor antagonist protein	0	0	4.67136	0.104705	0.58534	-1.05485	1.06581e-14	0	4.61093	0	0	-5.72621	0.905716	0.85274	0.060428	0	0	5.66578
842	A0A075B7J0	14.8075	12.551	12.3098	16.708	12.1725	14.5654	11.4633	12.4272	13.757	12.952	11.6243	11.5699	12.7956	13.2802	12.93	11.2181	14.5162	10.1944	12.0037	13.4454	12.9479	13.607	16.5564	12.3424	A0A075B7J0	NA	A0A075B7J0_PIG	Ig-like domain-containing protein	0.199511	0.62247	-1.55342	0.117852	0.61789	-1.36329	0.585597	0.83184	-0.368529	0.995406	0.81194	0.190131	0.923757	0.85274	-1.18489	0.806071	0.86169	0.994759
843	A0A5G2RHU2;A5GFY8;K7GNA5	12.4182	16.4252	14.9768	11.1862	14.7071	12.1268	14.5751	11.382	12.8855	14.4973	11.3784	15.4906	12.5406	11.5845	12.9278	12.9331	12.0857	11.6987	12.1319	13.9859	11.4802	12.4934	13.5972	12.1452	A0A5G2RHU2;A5GFY8;K7GNA5	PHGDH	A0A5G2RHU2_PIG;SERA_PIG;K7GNA5_PIG	D-3-phosphoglycerate dehydrogenase	0.98417	0.85373	-0.271902	0.339604	0.92338	-1.34499	0.687967	0.83184	-1.00109	0.553912	0.81194	-1.07309	0.874694	0.85274	0.729186	0.948814	0.86169	0.343905
844	A0A287AAP0;A0A5G2R332	12.9581	12.0015	13.6076	13.1667	12.558	13.1414	13.5372	12.2381	13.968	13.6791	13.223	12.0198	14.0486	14.1837	12.4759	12.8526	11.8121	13.2366	13.884	13.8242	12.0475	12.345	12.9424	13.0864	A0A287AAP0;A0A5G2R332	LOC100522130	A0A287AAP0_PIG;A0A5G2R332_PIG	Fumarylacetoacetate hydrolase domain-containing protein 2;FAA_hydrolase domain-containing protein	0.956821	0.85373	0.205294	0.973242	0.92338	0.196024	0.998024	0.83184	0.116048	0.999849	0.81194	-0.0092701	0.989006	0.85274	0.0892461	0.994571	0.86169	-0.079976
845	A0A287AD45;Q45FY6	13.0595	13.3718	12.739	13.0969	13.0533	13.196	13.5486	15.0876	13.863	13.5641	14.0177	12.7581	13.8607	12.8555	13.5942	14.3172	13.1941	13.7651	13.1455	13.5236	12.3477	13.1212	12.4268	13.0513	A0A287AD45;Q45FY6	HPRT1	A0A287AD45_PIG;HPRT_PIG	Hypoxanthine phosphoribosyltransferase;Hypoxanthine-guanine phosphoribosyltransferase	0.0449637	0.22561	0.720422	0.264534	0.92338	0.511688	0.942774	0.83184	-0.150084	0.868601	0.81194	-0.208734	0.0107124	0.07896	0.870506	0.0781723	0.35076	-0.661772
846	A0A287BHY5	12.3499	13.2273	13.0976	13.5749	13.4036	9.19514	12.3043	12.137	12.4399	12.0717	12.779	13.1435	9.57695	13.4367	12.6348	11.902	11.6109	12.761	14.0352	12.8315	13.1186	12.9467	13.8308	8.49098	A0A287BHY5	KRT2	A0A287BHY5_PIG	IF rod domain-containing protein	1	0.85373	0.00450276	0.974711	0.92338	-0.487678	0.946537	0.83184	0.0675715	0.973653	0.81194	-0.49218	0.948127	0.85274	-0.0630688	0.757884	0.86169	0.555249
847	A0A5G2QVP2;I3L8B2	11.8564	12.3335	12.6858	13.6899	13.2803	13.4702	13.5276	13.6402	13.3297	12.4309	13.8888	13.2541	11.8462	11.6276	11.994	12.698	13.5209	13.2724	11.0902	12.3177	11.7759	11.0474	10.356	11.0101	A0A5G2QVP2;I3L8B2	COL9A2	A0A5G2QVP2_PIG;I3L8B2_PIG	Uncharacterized protein	0.565864	0.85373	0.459221	0.62978	0.92338	-0.392841	2.21846e-05	0.00038	-1.61978	0.0627456	0.22655	-0.852062	1.35679e-08	0	2.079	0.00236763	0.02384	-1.22694
848	O19063	16.9413	13.2581	14.4599	15.1269	12.2152	15.1653	14.892	14.1352	12.9237	13.7286	11.9039	16.1625	13.1026	13.7272	12.8925	13.3718	12.7418	13.7084	13.6799	13.8109	15.5343	14.8977	13.772	14.1439	O19063	APCS	SAMP_PIG	Serum amyloid P-component	0.929473	0.85373	-0.570123	0.160203	0.73282	-1.27039	0.985579	0.83184	-0.221345	0.483888	0.81194	-0.700271	0.99567	0.85274	-0.348778	0.336208	0.86169	1.04905
849	A0A286ZMX6	12.6647	10.2647	10.0217	13.14	15.0563	10.7271	15.2486	14.0473	11.3256	11.5203	12.1765	15.2529	8.96172	15.3161	13.8603	13.9508	16.3552	11.8265	9.99851	12.1854	12.1837	14.7084	15.8051	8.7954	A0A286ZMX6	MT1D	A0A286ZMX6_PIG	Metallothionein	0.70378	0.85373	1.28277	0.564641	0.92338	1.39933	0.958535	0.83184	0.300298	0.995764	0.81194	0.116558	0.948911	0.85274	0.982475	0.86217	0.86169	-1.09903
850	I3LAB6	13.7835	13.3962	12.9043	12.8249	12.8976	13.1142	12.5424	14.4394	13.5527	13.038	13.1098	12.8419	14.0458	13.5268	10.9023	13.4739	13.5389	13.1116	12.5527	13.2683	12.9897	12.5296	12.906	12.9162	I3LAB6	PSMA2	I3LAB6_PIG	Proteasome subunit alpha type	0.97409	0.85373	0.100616	0.999869	0.92338	-0.0535402	0.860619	0.83184	-0.293019	0.960612	0.81194	-0.154156	0.645917	0.85274	0.393635	0.88388	0.86169	-0.239479
851	F1RIE3	13.2007	12.6257	12.904	12.8333	12.8711	11.7408	13.1612	12.2038	13.09	12.5588	11.8353	11.7596	11.3264	13.7036	11.9637	12.8762	13.2603	13.0086	13.3865	12.3867	12.245	13.6136	13.5106	12.6868	F1RIE3	VWCE	F1RIE3_PIG	von Willebrand factor C and EGF domains	0.859466	0.85373	-0.261172	0.997487	0.92338	-0.00613155	0.615132	0.83184	0.275593	0.763764	0.81194	0.255041	0.194366	0.52303	-0.536766	0.716976	0.86169	0.281725
852	A0A286ZXS6	13.3817	12.6179	12.1499	9.00992	11.0626	0	13.0689	12.8851	13.5329	13.1268	13.6464	12.6049	12.6718	13.3655	12.6275	13.4048	13.5456	11.8977	14.1117	13.5002	13.5195	12.0924	11.7138	12.8744	A0A286ZXS6	LOC100516039	A0A286ZXS6_PIG	C-C motif chemokine	0.0388424	0.19962	3.44052	0.0393257	0.32584	3.21516	0.0248532	0.1265	3.26502	0.999998	0.81194	-0.225362	0.995235	0.85274	0.175505	0.995843	0.86169	0.0498572
853	A0A287BL81;A0A287BLM4	11.0771	14.1956	8.68149	14.9703	13.979	14.2075	9.10762	12.9508	8.21537	10.4779	14.4614	13.1733	14.1736	13.5157	8.25191	0	14.2808	0	12.6521	14.1518	13.095	0	10.5278	0	A0A287BL81;A0A287BLM4	COL6A3	A0A287BL81_PIG;A0A287BLM4_PIG	Collagen type VI alpha 3 chain	0.948067	0.85373	-1.45408	0.360797	0.92338	-4.48148	0.407983	0.83184	-4.44734	0.694796	0.81194	-3.02739	0.736749	0.85274	2.99326	0.999966	0.86169	0.0341372
[truncated: 152 more rows]

## Sheet: 22h
		V1	V2	V3	V4	V5	V6	V7	V8	V9	V10	V11	V12	V13	V14	V15	V16	V17	V18	V19	V20	V21	V22	V23	V24
[truncated: 1,024 more rows]

## Sheet: PE_12hHighSEvsLOWSE
Annotation Cluster 1	Enrichment Score: 6.639781514145521
[truncated: 47 more rows]

## Sheet: PE_22hHighSEvsLOWSE
Annotation Cluster 1	Enrichment Score: 8.264089009355011
[truncated: 61 more rows]

## Sheet: 12hhighlow
Gene	rawP	adjp	log2FC
[truncated: 1,005 more rows]

## Sheet: 22hhighvslow
Gene	rawP	adjp	log2FC
[truncated: 1,009 more rows]
